# Supplementary material for: A Conserved MicroRNA Regulatory Circuit Is Differentially Controlled during Limb/Appendage Regeneration
Source: PLoS One. 2016 Jun 29;11(6):e0157106. doi: 10.1371/journal.pone.0157106 (PMC4927183; doi:10.1371/journal.pone.0157106)
Supplement: S9 Table — Statistics are given for bichir and axolotl assemblies as reported from the Trinity assembly software. For example, the number of transcripts, N50 length and percent of CEGMA proteins found in the assembly are reported. (XLSX) [file pone.0157106.s013.xlsx]

## Sheet: Sheet 1
S9 Table: Summary statistics of bichir and axolotl de novo transcriptome assemblies.
Organism	Bichir	Axolotl
Program	Trinity	Trinity
Assembly KMER	25	25
Min Contig Size	200	200
Trimmed	trimmo	trimmo
Normalized	trinity	trinity
Norm KMER	25	25
Norm COV	50	50
Label:	Polypterus.Trinity.K25.200.mincov-2	Axolotl.Trinity.K25.200.mincov-2
Transcripts:	Trinity.fasta	Trinity.fasta
Total trinity transcripts: 92864	136024	92864
Total trinity components: 73787	94273	73787
Contig N50	2213	2508
Number Transcripts:	136024	92864
Complete_ORFS:	25170	14892
Unique_ Annotations:	24043	20682
Mean 1K Longest:	2226	1756
Median 1K Longest:	1949	1505
CEGMA	99.19	99.6
num_reads	167215658	99886254
num_mapped	113893177	66210805
percent_mapped	68.11	66.29
percent_umapped_multimapper	25.22	24.71
percent_unmapped	6.64	9
Hit_%_Coverage_Bin	Count	Count
100	96	280
90	2981	3230
80	9183	8995
70	17569	14954
60	25434	19571
50	32018	23265
40	37202	26314
30	40664	28495
20	41259	28944
10	41274	28951
Top Ten Taxonomy	Danio rerio	Chrysemys picta bellii
	Chrysemys picta bellii	Xenopus (Silurana) tropicalis
	Maylandia zebra	Xenopus laevis
	Oreochromis niloticus	Gallus gallus
	Xenopus (Silurana) tropicalis	Anolis carolinensis
	Ficedula albicollis	Ficedula albicollis
	Oryzias latipes	Falco peregrinus
	Gallus gallus	Homo sapiens
	Homo sapiens	Melopsittacus undulatus
	Takifugu rubripes	Anas platyrhynchos
