# Supplementary material for: A Conserved MicroRNA Regulatory Circuit Is Differentially Controlled during Limb/Appendage Regeneration
Source: PLoS One. 2016 Jun 29;11(6):e0157106. doi: 10.1371/journal.pone.0157106 (PMC4927183; doi:10.1371/journal.pone.0157106)
Supplement: S12 Table — mRNA expression analysis results for regenerating axolotl forelimbs at 7 dpa compared to 0 dpa. Fold-change is expressed as log2. The average level of normalized expression across 0 dpa, 3 dpa, 7 dpa and 14 dpa samples and normalized read counts per sample are reported as expressed as log2 cpm. (XLSX) [file pone.0157106.s016.xlsx]

## Sheet: Sheet1
S12 Table: mRNA gene expression profiles of regenerating axolotl forelimbs.
Gene	logFC	logCPM	PValue	FDR	0DPA	3DPA	6DPA	14DPA	gene_id	transcript_id	Top_BLASTX_hit	RNAMMER	prot_id	prot_coords	Top_BLASTP_hit	Pfam	SignalP	TmHMM	eggnog	gene_ontology
comp100_c0_seq1	4.30815	-1.80611	0.631196	1	-Inf	3.70044	1.58496	1.58496	comp100_c0	.	.	.	.	.	.	.	.	.	.	.
comp10000_c0_seq1	0.651333	-0.618282	0.769907	1	3.16993	1.58496	4.64386	3.32193	comp10000_c0	.	.	.	.	.	.	.	.	.	.	.
comp10002_c0_seq1	4.70486	-1.78284	0.446576	1	-Inf	3.32193	2	2.32193	comp10002_c0	.	.	.	.	.	.	.	.	.	.	.
comp10003_c0_seq1	-1.60456	6.35458	0.297754	1	10.5915	11.7574	9.80413	10.3805	comp10003_c0	sp|P02721|ATP5J_BOVIN^P02721^Q:388-164,H:15-87^60%ID^E:-19.56^RecName: Full=ATP synthase-coupling factor 6, mitochondrial;^Eukaryota; Metazoa; Chordata; Craniata; Vertebrata; Euteleostomi; Mammalia; Eutheria; Laurasiatheria; Cetartiodactyla; Ruminantia; Pecora; Bovidae; Bovinae; Bos	.	m.4170	107-430[-]	sp|P02721|ATP5J_BOVIN^P02721^Q:1-107,H:1-105^59.8131%ID^E:-31.21^RecName: Full=ATP synthase-coupling factor 6, mitochondrial;^Eukaryota; Metazoa; Chordata; Craniata; Vertebrata; Euteleostomi; Mammalia; Eutheria; Laurasiatheria; Cetartiodactyla; Ruminantia; Pecora; Bovidae; Bovinae; Bos	PF05511.6^ATP-synt_F6^Mitochondrial ATP synthase coupling factor 6^1-99^E:1.6e-36	.	.	.	GO:0005753^cellular_component^mitochondrial proton-transporting ATP synthase complex`GO:0000276^cellular_component^mitochondrial proton-transporting ATP synthase complex, coupling factor F(o)`GO:0016887^molecular_function^ATPase activity`GO:0015078^molecular_function^hydrogen ion transmembrane transporter activity`GO:0015986^biological_process^ATP synthesis coupled proton transport
comp10004_c0_seq1	-3.4171	-1.05662	0.13192	1	3.70044	3.70044	1	2.58496	comp10004_c0	.	.	.	.	.	.	.	.	.	.	.
comp10005_c0_seq1	0.899575	-1.32966	0.723548	1	1.58496	2	3.32193	3.32193	comp10005_c0	.	.	.	.	.	.	.	.	.	.	.
comp10006_c0_seq1	-0.903326	-0.702598	0.66688	1	4	3.32193	3.90689	1.58496	comp10006_c0	.	.	.	.	.	.	.	.	.	.	.
comp10009_c0_seq1	3.75915	-1.48892	0.629402	1	-Inf	4.58496	1	0	comp10009_c0	.	.	.	.	.	.	.	.	.	.	.
comp10011_c0_seq1	-1.18993	-1.51596	0.706707	1	2	3.58496	1.58496	2.32193	comp10011_c0	.	.	.	.	.	.	.	.	.	.	.
comp10012_c0_seq1	-0.693534	0.423248	0.745651	1	4.52356	5.35755	4.64386	4.39232	comp10012_c0	.	.	.	.	.	.	.	.	.	.	.
comp10012_c0_seq2	5.67693	-1.22864	0.215356	1	-Inf	4	3	3	comp10012_c0	.	.	.	.	.	.	.	.	.	.	.
comp10014_c0_seq1	-3.54835	0.788362	0.110264	1	6.20945	4.64386	3.45943	3	comp10014_c0	sp|Q29277|PPR1B_PIG^Q29277^Q:3-143,H:59-105^72.3404%ID^E:-12.17^RecName: Full=Protein phosphatase 1 regulatory subunit 1B;^Eukaryota; Metazoa; Chordata; Craniata; Vertebrata; Euteleostomi; Mammalia; Eutheria; Laurasiatheria; Cetartiodactyla; Suina; Suidae; Sus	.	m.4171	3-509[+]	sp|Q29277|PPR1B_PIG^Q29277^Q:1-47,H:59-105^72.3404%ID^E:-12.32^RecName: Full=Protein phosphatase 1 regulatory subunit 1B;^Eukaryota; Metazoa; Chordata; Craniata; Vertebrata; Euteleostomi; Mammalia; Eutheria; Laurasiatheria; Cetartiodactyla; Suina; Suidae; Sus	PF05395.7^DARPP-32^Protein phosphatase inhibitor 1/DARPP-32^1-82^E:2.7e-13	.	.	NOG39986^Protein phosphatase 1, regulatory (inhibitor) subunit 1B	GO:0005737^cellular_component^cytoplasm`GO:0004864^molecular_function^protein phosphatase inhibitor activity`GO:0007165^biological_process^signal transduction
comp10015_c0_seq1	-1.43226	-0.155744	0.502304	1	4.08746	4.52356	3.45943	4.24793	comp10015_c0	.	.	.	.	.	.	.	.	.	.	.
comp10016_c0_seq1	0.34565	-1.0534	0.906858	1	2	3.90689	3.16993	3	comp10016_c0	.	.	.	.	.	.	.	.	.	.	.
comp10017_c0_seq1	1.11407	-1.47832	0.769407	1	0	4.08746	2	2	comp10017_c0	.	.	.	.	.	.	.	.	.	.	.
comp10018_c0_seq1	-0.785489	-1.64562	0.832905	1	1.58496	1	1.58496	3.58496	comp10018_c0	.	.	.	.	.	.	.	.	.	.	.
comp10019_c0_seq1	-0.00976039	-1.44083	1	1	2	3	2.80735	2.58496	comp10019_c0	sp|Q9H649|NSUN3_HUMAN^Q9H649^Q:174-4,H:11-67^63.1579%ID^E:-16.13^RecName: Full=Putative methyltransferase NSUN3;^Eukaryota; Metazoa; Chordata; Craniata; Vertebrata; Euteleostomi; Mammalia; Eutheria; Euarchontoglires; Primates; Haplorrhini; Catarrhini; Hominidae; Homo	.	.	.	.	.	.	.	COG0144^tRNA and rRNA cytosine-C5-methylases	GO:0008168^molecular_function^methyltransferase activity	.
comp1002_c0_seq1	2.08614	-2.1073	0.435483	1	0	2	3	-Inf	comp1002_c0	.	.	.	.	.	.	.	.	.	.	.
comp10020_c0_seq1	-0.547256	6.4709	0.718878	1	10.3083	11.807	10.5784	10.7211	comp10020_c0	sp|Q7YRK7|COX6C_TARSY^Q7YRK7^Q:121-345,H:1-75^76%ID^E:-26.39^RecName: Full=Cytochrome c oxidase subunit 6C;^Eukaryota; Metazoa; Chordata; Craniata; Vertebrata; Euteleostomi; Mammalia; Eutheria; Euarchontoglires; Primates; Haplorrhini; Tarsiiformes; Tarsiidae; Tarsius	.	.	.	.	.	.	.	.	GO:0016021^cellular_component^integral to membrane`GO:0005743^cellular_component^mitochondrial inner membrane`GO:0004129^molecular_function^cytochrome-c oxidase activity	.
comp10021_c0_seq1	-0.0791436	-0.87843	1	1	2.58496	4.32193	3.32193	2.58496	comp10021_c0	.	.	.	.	.	.	.	.	.	.	.
comp10022_c0_seq1	-0.542336	-1.68245	0.801785	1	2.32193	3	2.58496	0	comp10022_c0	.	.	.	.	.	.	.	.	.	.	.
comp10022_c0_seq2	1.84203	-0.871063	0.406191	1	2.32193	1	5	-Inf	comp10022_c0	.	.	.	.	.	.	.	.	.	.	.
comp10023_c0_seq1	0.50331	1.23442	0.813581	1	4.90689	6.04439	6.22882	4.85798	comp10023_c0	.	.	.	.	.	.	.	.	.	.	.
comp10024_c0_seq1	-7.72058	-1.57967	0.0367356	0.679141	4.24793	-Inf	-Inf	-Inf	comp10024_c0	.	.	.	.	.	.	.	.	.	.	.
comp10026_c0_seq1	0.175216	-1.22151	1	1	1	4.80735	2	-Inf	comp10026_c0	.	.	.	.	.	.	.	.	.	.	.
comp10028_c0_seq1	2.65234	-0.188086	0.291748	1	1	4.16993	4.52356	4.80735	comp10028_c0	.	.	.	.	.	.	.	.	.	.	.
comp10031_c0_seq1	1.68047	-1.54989	0.50803	1	0	3.80735	2.58496	1.58496	comp10031_c0	.	.	.	.	.	.	.	.	.	.	.
comp10032_c0_seq1	0.451785	5.83889	0.763637	1	9.09276	10.9751	10.3619	10.4553	comp10032_c0	sp|B0BLS0|OST4_RAT^B0BLS0^Q:333-223,H:1-37^97.2973%ID^E:-12.06^RecName: Full=Dolichyl-diphosphooligosaccharide--protein glycosyltransferase subunit 4;^Eukaryota; Metazoa; Chordata; Craniata; Vertebrata; Euteleostomi; Mammalia; Eutheria; Euarchontoglires; Glires; Rodentia; Sciurognathi; Muroidea; Muridae; Murinae; Rattus	.	.	.	.	.	.	.	NOG42173^Dolichyl-Diphosphooligosaccharide--Protein glycosyltransferase subunit 4	GO:0005789^cellular_component^endoplasmic reticulum membrane`GO:0016021^cellular_component^integral to membrane	.
comp10033_c0_seq1	0.49982	-0.163145	0.865235	1	3	4.24793	4.32193	4.58496	comp10033_c0	.	.	.	.	.	.	.	.	.	.	.
comp10034_c0_seq1	0.899575	-0.568739	0.722702	1	1.58496	4.90689	3.32193	3.70044	comp10034_c0	sp|Q9HBT7|ZN287_HUMAN^Q9HBT7^Q:343-549,H:23-91^36.2319%ID^E:-6.44^RecName: Full=Zinc finger protein 287;^Eukaryota; Metazoa; Chordata; Craniata; Vertebrata; Euteleostomi; Mammalia; Eutheria; Euarchontoglires; Primates; Haplorrhini; Catarrhini; Hominidae; Homo	.	m.4174	1-552[+]	sp|Q9HBT7|ZN287_HUMAN^Q9HBT7^Q:115-183,H:23-91^36.2319%ID^E:-6.44^RecName: Full=Zinc finger protein 287;^Eukaryota; Metazoa; Chordata; Craniata; Vertebrata; Euteleostomi; Mammalia; Eutheria; Euarchontoglires; Primates; Haplorrhini; Catarrhini; Hominidae; Homo	PF02023.12^SCAN^SCAN domain^129-183^E:5.8e-11	sigP:1^11^0.472^YES	.	COG5048^FOG: Zn-finger	GO:0005634^cellular_component^nucleus`GO:0003677^molecular_function^DNA binding`GO:0046872^molecular_function^metal ion binding`GO:0003700^molecular_function^sequence-specific DNA binding transcription factor activity`GO:0008270^molecular_function^zinc ion binding`GO:0045893^biological_process^positive regulation of transcription, DNA-dependent`GO:0042035^biological_process^regulation of cytokine…
comp10035_c0_seq1	-1.33449	-1.70879	0.617473	1	1.58496	3.32193	1	2.32193	comp10035_c0	.	.	.	.	.	.	.	.	.	.	.
comp10036_c0_seq1	-0.395421	-1.35432	0.919332	1	2.58496	2	3	3	comp10036_c0	.	.	.	.	.	.	.	.	.	.	.
comp1004_c0_seq1	1.11407	-1.87709	0.771386	1	0	3	2	2	comp1004_c0	.	.	.	.	.	.	.	.	.	.	.
comp10040_c0_seq1	-0.228632	-0.871184	1	1	2.58496	3.80735	3.16993	3.58496	comp10040_c0	.	.	.	.	.	.	.	.	.	.	.
comp10042_c0_seq1	0.74162	-1.70863	0.868874	1	1	3.16993	2.58496	1.58496	comp10042_c0	.	.	.	.	.	.	.	.	.	.	.
comp10043_c0_seq1	0.486037	-1.84679	1	1	1	2.32193	2.32193	2.32193	comp10043_c0	.	.	.	.	.	.	.	.	.	.	.
comp10045_c0_seq1	0.758752	-0.196875	0.737876	1	2.58496	4.80735	4.16993	4.32193	comp10045_c0	.	.	.	.	.	.	.	.	.	.	.
comp10046_c0_seq1	5.27127	-1.66958	0.267354	1	-Inf	4	2.58496	-Inf	comp10046_c0	sp|Q14246|EMR1_HUMAN^Q14246^Q:292-2,H:736-832^67.0103%ID^E:-31.67^RecName: Full=EGF-like module-containing mucin-like hormone receptor-like 1;^Eukaryota; Metazoa; Chordata; Craniata; Vertebrata; Euteleostomi; Mammalia; Eutheria; Euarchontoglires; Primates; Haplorrhini; Catarrhini; Hominidae; Homo	.	.	.	.	.	.	.	NOG239437^SPC25, NDC80 kinetochore complex component, homolog (S. cerevisiae) protein	GO:0009897^cellular_component^external side of plasma membrane`GO:0005887^cellular_component^integral to plasma membrane`GO:0005509^molecular_function^calcium ion binding`GO:0004930^molecular_function^G-protein coupled receptor activity`GO:0007155^biological_process^cell adhesion`GO:0007218^biological_process^neuropeptide signaling pathway	.
comp10048_c0_seq1	-1.16184	-1.17682	0.599911	1	3.16993	4	2.80735	-Inf	comp10048_c0	.	.	.	.	.	.	.	.	.	.	.
comp10049_c0_seq1	-1.98353	-1.23693	0.418519	1	2.80735	3.58496	1.58496	3	comp10049_c0	.	.	.	.	.	.	.	.	.	.	.
comp1005_c0_seq1	1.47697	-0.883084	0.55202	1	1.58496	3	3.90689	3.80735	comp1005_c0	.	.	.	.	.	.	.	.	.	.	.
comp10050_c0_seq1	0.17763	-1.70257	1	1	1.58496	3.16993	2.58496	1	comp10050_c0	.	.	.	.	.	.	.	.	.	.	.
comp10052_c0_seq1	-0.388775	-1.2726	1	1	1.58496	3	2	3.80735	comp10052_c0	sp|Q9WVQ0|PMFBP_MOUSE^Q9WVQ0^Q:318-103,H:894-965^52.7778%ID^E:-15.21^RecName: Full=Polyamine-modulated factor 1-binding protein 1;^Eukaryota; Metazoa; Chordata; Craniata; Vertebrata; Euteleostomi; Mammalia; Eutheria; Euarchontoglires; Glires; Rodentia; Sciurognathi; Muroidea; Muridae; Murinae; Mus; Mus	.	m.4175	1-321[-]	sp|Q9WVQ0|PMFBP_MOUSE^Q9WVQ0^Q:2-73,H:894-965^52.7778%ID^E:-15.21^RecName: Full=Polyamine-modulated factor 1-binding protein 1;^Eukaryota; Metazoa; Chordata; Craniata; Vertebrata; Euteleostomi; Mammalia; Eutheria; Euarchontoglires; Glires; Rodentia; Sciurognathi; Muroidea; Muridae; Murinae; Mus; Mus	.	.	.	NOG138716^Polyamine modulated factor 1 binding protein 1	GO:0005737^cellular_component^cytoplasm
comp10053_c0_seq1	0.17763	-1.11992	1	1	1.58496	4.24793	2.58496	2.80735	comp10053_c0	sp|Q6ZQ18|EFR3B_MOUSE^Q6ZQ18^Q:1-411,H:60-196^90.5109%ID^E:-68.67^RecName: Full=Protein EFR3 homolog B;^Eukaryota; Metazoa; Chordata; Craniata; Vertebrata; Euteleostomi; Mammalia; Eutheria; Euarchontoglires; Glires; Rodentia; Sciurognathi; Muroidea; Muridae; Murinae; Mus; Mus	.	m.4176	1-414[+]	sp|Q6ZQ18|EFR3B_MOUSE^Q6ZQ18^Q:1-137,H:60-196^90.5109%ID^E:-68.67^RecName: Full=Protein EFR3 homolog B;^Eukaryota; Metazoa; Chordata; Craniata; Vertebrata; Euteleostomi; Mammalia; Eutheria; Euarchontoglires; Glires; Rodentia; Sciurognathi; Muroidea; Muridae; Murinae; Mus; Mus	.	.	.	NOG246896^Calcium ion binding protein	.
comp10054_c0_seq1	-0.584043	-1.21587	0.827383	1	2.58496	3	2.80735	3.16993	comp10054_c0	.	.	.	.	.	.	.	.	.	.	.
comp10055_c0_seq1	0.0301205	-1.6518	1	1	2.32193	2	3.16993	1	comp10055_c0	.	.	.	.	.	.	.	.	.	.	.
comp10056_c0_seq1	1.16469	-0.621313	0.599436	1	2	3.70044	4	4.08746	comp10056_c0	.	.	m.4177	1-408[-]	.	PF00078.22^RVT_1^Reverse transcriptase (RNA-dependent DNA polymerase)^7-131^E:8.1e-17	.	.	.	.
comp10058_c0_seq1	0.175216	-1.7628	1	1	1	3.16993	2	2	comp10058_c0	.	.	.	.	.	.	.	.	.	.	.
comp10059_c0_seq1	-1.16184	-1.16613	0.599852	1	3.16993	3.16993	2.80735	2.58496	comp10059_c0	sp|Q924A2|CIC_MOUSE^Q924A2^Q:125-235,H:89-123^59.4595%ID^E:-3.28^RecName: Full=Protein capicua homolog;^Eukaryota; Metazoa; Chordata; Craniata; Vertebrata; Euteleostomi; Mammalia; Eutheria; Euarchontoglires; Glires; Rodentia; Sciurognathi; Muroidea; Muridae; Murinae; Mus; Mus	.	.	.	.	.	.	.	NOG12793^Calcium ion binding protein	GO:0005634^cellular_component^nucleus`GO:0003677^molecular_function^DNA binding`GO:0006355^biological_process^regulation of transcription, DNA-dependent`GO:0006351^biological_process^transcription, DNA-dependent	.
comp10062_c0_seq1	0.394675	-1.49332	1	1	1.58496	3	2.80735	2.58496	comp10062_c0	sp|Q3V3E1|UBS3A_MOUSE^Q3V3E1^Q:230-3,H:216-291^65.7895%ID^E:-25.88^RecName: Full=Ubiquitin-associated and SH3 domain-containing protein A;^Eukaryota; Metazoa; Chordata; Craniata; Vertebrata; Euteleostomi; Mammalia; Eutheria; Euarchontoglires; Glires; Rodentia; Sciurognathi; Muroidea; Muridae; Murinae; Mus; Mus	.	.	.	.	.	.	.	.	GO:0005829^cellular_component^cytosol`GO:0005634^cellular_component^nucleus`GO:0050860^biological_process^negative regulation of T cell receptor signaling pathway`GO:0001817^biological_process^regulation of cytokine production	.
comp10063_c0_seq1	-0.806431	-0.759659	0.756303	1	3.16993	4.16993	3.16993	3.16993	comp10063_c0	.	.	.	.	.	.	.	.	.	.	.
comp10064_c0_seq1	5.84372	-1.04355	0.17948	1	-Inf	4.9542	3.16993	-Inf	comp10064_c0	.	.	.	.	.	.	.	.	.	.	.
comp10065_c0_seq1	5.01568	-1.8244	0.338925	1	-Inf	3	2.32193	2.32193	comp10065_c0	sp|Q69566|U88_HHV6U^Q69566^Q:75-146,H:118-141^50%ID^E:-1.76138^RecName: Full=Uncharacterized protein U88;^Viruses; dsDNA viruses, no RNA stage; Herpesvirales; Herpesviridae; Betaherpesvirinae; Roseolovirus	.	.	.	.	.	.	.	.	GO:0016021^cellular_component^integral to membrane	.
comp10066_c0_seq1	0.394675	-1.61066	1	1	1.58496	2	2.80735	2.80735	comp10066_c0	.	.	.	.	.	.	.	.	.	.	.
comp10068_c0_seq1	0.175216	-1.86278	1	1	1	2.80735	2	2	comp10068_c0	.	.	.	.	.	.	.	.	.	.	.
comp10069_c0_seq1	5.01568	-1.53292	0.336032	1	-Inf	3.45943	2.32193	3	comp10069_c0	.	.	.	.	.	.	.	.	.	.	.
comp1007_c0_seq1	0.750086	-1.11435	0.799414	1	1.58496	4.16993	3.16993	2.32193	comp1007_c0	sp|Q9Z1S8|GAB2_MOUSE^Q9Z1S8^Q:1-390,H:468-589^75.3846%ID^E:-50.23^RecName: Full=GRB2-associated-binding protein 2;^Eukaryota; Metazoa; Chordata; Craniata; Vertebrata; Euteleostomi; Mammalia; Eutheria; Euarchontoglires; Glires; Rodentia; Sciurognathi; Muroidea; Muridae; Murinae; Mus; Mus	.	m.68	1-393[+]	sp|Q9Z1S8|GAB2_MOUSE^Q9Z1S8^Q:1-130,H:468-589^75.3846%ID^E:-50.23^RecName: Full=GRB2-associated-binding protein 2;^Eukaryota; Metazoa; Chordata; Craniata; Vertebrata; Euteleostomi; Mammalia; Eutheria; Euarchontoglires; Glires; Rodentia; Sciurognathi; Muroidea; Muridae; Murinae; Mus; Mus	.	.	.	NOG83177^Grb2-Associated-Binding protein 2	GO:0005737^cellular_component^cytoplasm`GO:0005886^cellular_component^plasma membrane`GO:0005547^molecular_function^phosphatidylinositol-3,4,5-trisphosphate binding`GO:0043325^molecular_function^phosphatidylinositol-3,4-bisphosphate binding`GO:0005068^molecular_function^transmembrane receptor protein tyrosine kinase adaptor activity`GO:0030316^biological_process^osteoclast differentiation`GO:0048…
comp10070_c0_seq1	0.175216	-1.77077	1	1	1	3.32193	2	1.58496	comp10070_c0	.	.	.	.	.	.	.	.	.	.	.
comp10072_c0_seq1	-1.79413	-0.766874	0.408568	1	3.80735	4.24793	2.80735	2	comp10072_c0	sp|P11029|ACAC_CHICK^P11029^Q:357-1,H:713-831^77.3109%ID^E:-49.42^RecName: Full=Acetyl-CoA carboxylase;^Eukaryota; Metazoa; Chordata; Craniata; Vertebrata; Euteleostomi; Archosauria; Dinosauria; Saurischia; Theropoda; Coelurosauria; Aves; Neognathae; Galliformes; Phasianidae; Phasianinae; Gallus	.	m.4178	1-420[-]	sp|P11029|ACAC_CHICK^P11029^Q:1-140,H:692-831^76.4286%ID^E:-59.28^RecName: Full=Acetyl-CoA carboxylase;^Eukaryota; Metazoa; Chordata; Craniata; Vertebrata; Euteleostomi; Archosauria; Dinosauria; Saurischia; Theropoda; Coelurosauria; Aves; Neognathae; Galliformes; Phasianidae; Phasianinae; Gallus	PF00364.17^Biotin_lipoyl^Biotin-requiring enzyme^62-127^E:3.6e-15	.	.	COG0511^Biotin carboxyl carrier protein	GO:0005737^cellular_component^cytoplasm`GO:0003989^molecular_function^acetyl-CoA carboxylase activity`GO:0005524^molecular_function^ATP binding`GO:0004075^molecular_function^biotin carboxylase activity`GO:0046872^molecular_function^metal ion binding`GO:0006633^biological_process^fatty acid biosynthetic process`GO:2001295^biological_process^malonyl-CoA biosynthetic process
comp10073_c0_seq1	2.25293	-1.51587	0.367561	1	0	1.58496	3.16993	3.32193	comp10073_c0	sp|Q5ZJ27|HOOK1_CHICK^Q5ZJ27^Q:287-3,H:84-178^72.6316%ID^E:-32.96^RecName: Full=Protein Hook homolog 1;^Eukaryota; Metazoa; Chordata; Craniata; Vertebrata; Euteleostomi; Archosauria; Dinosauria; Saurischia; Theropoda; Coelurosauria; Aves; Neognathae; Galliformes; Phasianidae; Phasianinae; Gallus	.	.	.	.	.	.	.	NOG130433^Hook homolog protein	GO:0070695^cellular_component^FHF complex`GO:0005874^cellular_component^microtubule`GO:0045022^biological_process^early endosome to late endosome transport`GO:0007032^biological_process^endosome organization`GO:0008333^biological_process^endosome to lysosome transport`GO:0007040^biological_process^lysosome organization`GO:0000226^biological_process^microtubule cytoskeleton organization`GO:0015031…	.
comp10074_c0_seq1	0.486037	-1.62686	1	1	1	3.58496	2.32193	1.58496	comp10074_c0	.	.	.	.	.	.	.	.	.	.	.
comp10075_c0_seq1	-3.88381	-0.615089	0.0851619	1	4.16993	4.90689	1	0	comp10075_c0	sp|O75578|ITA10_HUMAN^O75578^Q:518-9,H:232-401^72.9412%ID^E:-67.61^RecName: Full=Integrin alpha-10;^Eukaryota; Metazoa; Chordata; Craniata; Vertebrata; Euteleostomi; Mammalia; Eutheria; Euarchontoglires; Primates; Haplorrhini; Catarrhini; Hominidae; Homo	.	m.4179	3-518[-]	sp|O75578|ITA10_HUMAN^O75578^Q:1-170,H:232-401^72.9412%ID^E:-67.61^RecName: Full=Integrin alpha-10;^Eukaryota; Metazoa; Chordata; Craniata; Vertebrata; Euteleostomi; Mammalia; Eutheria; Euarchontoglires; Primates; Haplorrhini; Catarrhini; Hominidae; Homo	PF00092.23^VWA^von Willebrand factor type A domain^6-118^E:2.3e-19	.	.	NOG247042^Mitochondrial ribosomal protein L55	GO:0008305^cellular_component^integrin complex`GO:0005518^molecular_function^collagen binding`GO:0046872^molecular_function^metal ion binding`GO:0007160^biological_process^cell-matrix adhesion`GO:0007229^biological_process^integrin-mediated signaling pathway
comp10076_c0_seq1	1.14729	-1.13836	0.761181	1	1	3.32193	3	3.70044	comp10076_c0	sp|Q5TZA2|CROCC_HUMAN^Q5TZA2^Q:10-306,H:1082-1180^60.6061%ID^E:-28.08^RecName: Full=Rootletin;^Eukaryota; Metazoa; Chordata; Craniata; Vertebrata; Euteleostomi; Mammalia; Eutheria; Euarchontoglires; Primates; Haplorrhini; Catarrhini; Hominidae; Homo	.	m.4181	1-357[+]	sp|Q5TZA2|CROCC_HUMAN^Q5TZA2^Q:4-118,H:1082-1196^59.1304%ID^E:-33.18^RecName: Full=Rootletin;^Eukaryota; Metazoa; Chordata; Craniata; Vertebrata; Euteleostomi; Mammalia; Eutheria; Euarchontoglires; Primates; Haplorrhini; Catarrhini; Hominidae; Homo	.	.	.	NOG12793^Calcium ion binding protein	GO:0015629^cellular_component^actin cytoskeleton`GO:0005814^cellular_component^centriole`GO:0035253^cellular_component^ciliary rootlet`GO:0005886^cellular_component^plasma membrane`GO:0019894^molecular_function^kinesin binding`GO:0005198^molecular_function^structural molecule activity`GO:0007049^biological_process^cell cycle`GO:0030030^biological_process^cell projection organization`GO:0051297^bi…
comp10078_c0_seq1	-0.228632	-0.739281	1	1	2.58496	3.58496	3.16993	4.16993	comp10078_c0	.	.	.	.	.	.	.	.	.	.	.
comp10080_c0_seq1	0.630582	-1.38247	0.827925	1	2	2.58496	3.45943	2.32193	comp10080_c0	.	.	m.4182	3-311[+]	.	.	.	.	.	.
comp10081_c0_seq1	-3.52065	-0.773098	0.116555	1	4.75489	3	2	-Inf	comp10081_c0	.	.	.	.	.	.	.	.	.	.	.
comp10082_c0_seq1	0.168352	-1.60434	1	1	0	3.90689	1	2.32193	comp10082_c0	.	.	.	.	.	.	.	.	.	.	.
comp10083_c0_seq1	-0.614747	-1.133	0.848165	1	2.80735	3	3	3.16993	comp10083_c0	.	.	.	.	.	.	.	.	.	.	.
comp10084_c0_seq1	-1.63447	-1.037	0.510005	1	3.16993	4.08746	2.32193	2.32193	comp10084_c0	.	.	m.4184	1-336[-]	.	.	.	.	.	.
comp10087_c0_seq1	-0.704089	-0.447802	0.738747	1	3.70044	3.70044	3.80735	3.90689	comp10087_c0	.	.	.	.	.	.	.	.	.	.	.
comp10089_c0_seq1	0.583298	-1.7424	0.89207	1	1.58496	2.80735	3	0	comp10089_c0	.	.	.	.	.	.	.	.	.	.	.
comp1009_c0_seq1	-1.276	-1.37738	0.65875	1	2.80735	3.80735	2.32193	0	comp1009_c0	.	.	.	.	.	.	.	.	.	.	.
comp10090_c0_seq1	1.11407	-1.86893	0.771341	1	0	2.80735	2	2.32193	comp10090_c0	.	.	.	.	.	.	.	.	.	.	.
comp10091_c0_seq1	-0.565488	-0.153466	0.797644	1	4	4.64386	4.24793	3.45943	comp10091_c0	.	.	.	.	.	.	.	.	.	.	.
comp10092_c0_seq1	0.394675	-1.52598	1	1	1.58496	2.58496	2.80735	2.80735	comp10092_c0	.	.	.	.	.	.	.	.	.	.	.
comp10093_c0_seq1	1.92397	1.43805	0.384399	1	3.45943	7.53916	6.20945	3	comp10093_c0	.	.	.	.	.	.	.	.	.	.	.
comp10094_c0_seq1	-2.44931	-0.69504	0.236039	1	4.24793	3.58496	2.58496	2.80735	comp10094_c0	.	.	.	.	.	.	.	.	.	.	.
comp10095_c0_seq1	-0.584043	-1.31932	0.827701	1	2.58496	3.45943	2.80735	2	comp10095_c0	.	.	.	.	.	.	.	.	.	.	.
comp10096_c0_seq1	6.36649	-1.34335	0.117864	1	-Inf	3.90689	3.70044	0	comp10096_c0	.	.	.	.	.	.	.	.	.	.	.
comp10097_c0_seq1	1.46356	-0.355645	0.605301	1	1	2.80735	3.32193	5.35755	comp10097_c0	sp|Q54U49|MED12_DICDI^Q54U49^Q:183-88,H:675-706^50%ID^E:-0.49^RecName: Full=Putative mediator of RNA polymerase II transcription subunit 12;^Eukaryota; Amoebozoa; Mycetozoa; Dictyosteliida; Dictyostelium	.	.	.	.	.	.	.	.	GO:0016592^cellular_component^mediator complex`GO:0001104^molecular_function^RNA polymerase II transcription cofactor activity`GO:0006367^biological_process^transcription initiation from RNA polymerase II promoter	.
comp10098_c0_seq1	-0.803369	-0.89074	0.757842	1	2.80735	4.52356	2.80735	2.32193	comp10098_c0	.	.	m.4185	1-456[-]	.	.	.	.	.	.
comp10099_c0_seq1	-2.27114	-0.417692	0.291935	1	4.64386	3.90689	3.16993	2.32193	comp10099_c0	sp|Q6NWF1|GTR12_DANRE^Q6NWF1^Q:276-172,H:50-84^65.7143%ID^E:-14.958^RecName: Full=Solute carrier family 2, facilitated glucose transporter member 12;^Eukaryota; Metazoa; Chordata; Craniata; Vertebrata; Euteleostomi; Actinopterygii; Neopterygii; Teleostei; Ostariophysi; Cypriniformes; Cyprinidae; Danio	.	m.4188	1-414[-]	sp|Q32NG5|GTR12_XENLA^Q32NG5^Q:22-138,H:16-131^65.812%ID^E:-34.58^RecName: Full=Solute carrier family 2, facilitated glucose transporter member 12;^Eukaryota; Metazoa; Chordata; Craniata; Vertebrata; Euteleostomi; Amphibia; Batrachia; Anura; Pipoidea; Pipidae; Xenopodinae; Xenopus; Xenopus	PF00083.19^Sugar_tr^Sugar (and other) transporter^46-138^E:7e-13	.	ExpAA=66.99^PredHel=3^Topology=i40-62o82-102i115-137o	.	GO:0012505^cellular_component^endomembrane system`GO:0016021^cellular_component^integral to membrane`GO:0022891^molecular_function^substrate-specific transmembrane transporter activity`GO:0008643^biological_process^carbohydrate transport
comp101_c0_seq1	1.31408	-1.13598	0.674879	1	1	3.90689	3.16993	3	comp101_c0	.	.	.	.	.	.	.	.	.	.	.
comp1010_c0_seq1	-6.93705	-1.90394	0.0810713	0.998568	3.45943	2	-Inf	-Inf	comp1010_c0	.	.	.	.	.	.	.	.	.	.	.
comp10100_c0_seq1	-7.79423	-1.51954	0.0345909	0.664388	4.32193	-Inf	-Inf	-Inf	comp10100_c0	sp|P25975|CATL1_BOVIN^P25975^Q:224-3,H:10-83^58.1081%ID^E:-18.57^RecName: Full=Cathepsin L1;^Eukaryota; Metazoa; Chordata; Craniata; Vertebrata; Euteleostomi; Mammalia; Eutheria; Laurasiatheria; Cetartiodactyla; Ruminantia; Pecora; Bovidae; Bovinae; Bos	.	.	.	.	.	.	.	COG4870^Cysteine protease	GO:0005764^cellular_component^lysosome`GO:0008234^molecular_function^cysteine-type peptidase activity`GO:0006508^biological_process^proteolysis	.
comp10101_c0_seq1	-0.803369	-1.18854	0.758478	1	2.80735	2.32193	2.80735	3.45943	comp10101_c0	.	.	.	.	.	.	.	.	.	.	.
comp10102_c0_seq1	1.37852	-0.798648	0.552026	1	1.58496	3.80735	3.80735	3.70044	comp10102_c0	.	.	.	.	.	.	.	.	.	.	.
comp10103_c0_seq1	-0.450146	1.66704	0.837278	1	5.49185	6.56986	5.85798	6.18982	comp10103_c0	.	.	.	.	.	.	.	.	.	.	.
comp10103_c0_seq2	-5.09364	-1.47114	0.335506	1	1.58496	4.58496	-Inf	-Inf	comp10103_c0	.	.	.	.	.	.	.	.	.	.	.
comp10104_c0_seq1	1.68047	-1.63321	0.508842	1	0	3.58496	2.58496	1.58496	comp10104_c0	sp|Q6ZUK4|TMM26_HUMAN^Q6ZUK4^Q:129-224,H:1-32^68.75%ID^E:-4.77^RecName: Full=Transmembrane protein 26;^Eukaryota; Metazoa; Chordata; Craniata; Vertebrata; Euteleostomi; Mammalia; Eutheria; Euarchontoglires; Primates; Haplorrhini; Catarrhini; Hominidae; Homo	.	.	.	.	.	.	.	.	GO:0016021^cellular_component^integral to membrane	.
comp10105_c0_seq1	-0.797918	-1.04933	0.799278	1	2.32193	2.32193	2.32193	4.24793	comp10105_c0	.	.	.	.	.	.	.	.	.	.	.
comp10108_c0_seq1	-3.35132	-0.707777	0.135351	1	4.58496	3.80735	2	0	comp10108_c0	.	.	.	.	.	.	.	.	.	.	.
comp10109_c0_seq1	-1.276	-0.803244	0.65677	1	2.80735	3.80735	2.32193	4.08746	comp10109_c0	.	.	.	.	.	.	.	.	.	.	.
comp10110_c0_seq1	-2.00181	0.211361	0.337105	1	4.52356	5.52356	3.32193	4.08746	comp10110_c0	.	.	.	.	.	.	.	.	.	.	.
comp10111_c0_seq1	1.94251	-1.00477	0.45026	1	1	4	3.80735	2.58496	comp10111_c0	.	.	.	.	.	.	.	.	.	.	.
comp10112_c0_seq1	2.25293	-1.89104	0.372257	1	0	1	3.16993	2	comp10112_c0	.	.	.	.	.	.	.	.	.	.	.
comp10113_c0_seq1	-0.79321	-1.95894	0.869838	1	2	2.32193	2	1	comp10113_c0	.	.	.	.	.	.	.	.	.	.	.
comp10114_c0_seq1	-0.943834	-0.862146	0.631068	1	3.45943	3.58496	3.32193	2.80735	comp10114_c0	.	.	m.4189	2-328[-]	sp|A6NEL2|SWAHB_HUMAN^A6NEL2^Q:6-28,H:68-96^62.069%ID^E:-0.13^RecName: Full=Ankyrin repeat domain-containing protein SOWAHB;^Eukaryota; Metazoa; Chordata; Craniata; Vertebrata; Euteleostomi; Mammalia; Eutheria; Euarchontoglires; Primates; Haplorrhini; Catarrhini; Hominidae; Homo	.	.	.	NOG130045^Ankyrin repeat domain 56 protein	.
comp10115_c0_seq1	-1.05667	-1.53007	0.724767	1	2.58496	3.16993	2.32193	1.58496	comp10115_c0	.	.	.	.	.	.	.	.	.	.	.
comp10116_c0_seq1	-0.6383	-1.21916	0.807982	1	3	3.32193	3.16993	1.58496	comp10116_c0	.	.	.	.	.	.	.	.	.	.	.
comp10117_c0_seq1	6.36649	-0.831925	0.116201	1	-Inf	3.58496	3.70044	4.16993	comp10117_c0	sp|Q9H799|CE042_HUMAN^Q9H799^Q:249-371,H:1329-1369^65.8537%ID^E:-7.33^RecName: Full=Uncharacterized protein C5orf42;^Eukaryota; Metazoa; Chordata; Craniata; Vertebrata; Euteleostomi; Mammalia; Eutheria; Euarchontoglires; Primates; Haplorrhini; Catarrhini; Hominidae; Homo	.	m.4190	3-380[+]	sp|Q9H799|CE042_HUMAN^Q9H799^Q:83-123,H:1329-1369^65.8537%ID^E:-7.32^RecName: Full=Uncharacterized protein C5orf42;^Eukaryota; Metazoa; Chordata; Craniata; Vertebrata; Euteleostomi; Mammalia; Eutheria; Euarchontoglires; Primates; Haplorrhini; Catarrhini; Hominidae; Homo	.	.	.	.	GO:0016021^cellular_component^integral to membrane
comp10118_c0_seq1	-0.785489	-1.8375	0.833737	1	1.58496	3.58496	1.58496	-Inf	comp10118_c0	sp|Q95333|XPP2_PIG^Q95333^Q:212-3,H:544-610^65.7143%ID^E:-19.97^RecName: Full=Xaa-Pro aminopeptidase 2;^Eukaryota; Metazoa; Chordata; Craniata; Vertebrata; Euteleostomi; Mammalia; Eutheria; Laurasiatheria; Cetartiodactyla; Suina; Suidae; Sus	.	.	.	.	.	.	.	COG0006^Xaa-Pro aminopeptidase	GO:0031225^cellular_component^anchored to membrane`GO:0005886^cellular_component^plasma membrane`GO:0004177^molecular_function^aminopeptidase activity`GO:0046872^molecular_function^metal ion binding`GO:0008237^molecular_function^metallopeptidase activity`GO:0009987^biological_process^cellular process`GO:0006508^biological_process^proteolysis	.
comp10119_c0_seq1	1.31408	-1.64896	0.678135	1	1	3	3.16993	1	comp10119_c0	.	.	.	.	.	.	.	.	.	.	.
comp10120_c0_seq1	0.74162	-1.37794	0.867832	1	1	3.32193	2.58496	3.16993	comp10120_c0	sp|Q3B725|ZBT24_RAT^Q3B725^Q:6-146,H:85-131^76.5957%ID^E:-13.784^RecName: Full=Zinc finger and BTB domain-containing protein 24;^Eukaryota; Metazoa; Chordata; Craniata; Vertebrata; Euteleostomi; Mammalia; Eutheria; Euarchontoglires; Glires; Rodentia; Sciurognathi; Muroidea; Muridae; Murinae; Rattus	.	.	.	.	.	.	.	COG5048^FOG: Zn-finger	GO:0005634^cellular_component^nucleus`GO:0003677^molecular_function^DNA binding`GO:0046872^molecular_function^metal ion binding`GO:0003700^molecular_function^sequence-specific DNA binding transcription factor activity`GO:0008270^molecular_function^zinc ion binding`GO:0006351^biological_process^transcription, DNA-dependent	.
comp10121_c0_seq1	-0.662512	0.405676	0.763514	1	4.75489	4.85798	4.90689	4.16993	comp10121_c0	.	.	.	.	.	.	.	.	.	.	.
comp10123_c0_seq1	-2.04591	-0.932218	0.384266	1	3.58496	3.80735	2.32193	2.80735	comp10123_c0	.	.	.	.	.	.	.	.	.	.	.
comp10125_c0_seq1	0.0922722	7.53152	0.955541	1	10.7557	12.6933	11.6653	12.4328	comp10125_c0	sp|Q3ZC10|SMD1_BOVIN^Q3ZC10^Q:160-447,H:1-96^98.9583%ID^E:-45.83^RecName: Full=Small nuclear ribonucleoprotein Sm D1;^Eukaryota; Metazoa; Chordata; Craniata; Vertebrata; Euteleostomi; Mammalia; Eutheria; Laurasiatheria; Cetartiodactyla; Ruminantia; Pecora; Bovidae; Bovinae; Bos	.	.	.	.	.	.	.	COG1958^Small nuclear ribonucleoprotein (snRNP) homolog	GO:0071013^cellular_component^catalytic step 2 spliceosome`GO:0005737^cellular_component^cytoplasm`GO:0005689^cellular_component^U12-type spliceosomal complex`GO:0006397^biological_process^mRNA processing`GO:0008380^biological_process^RNA splicing	.
comp10126_c0_seq1	-0.7705	-1.87011	0.771347	1	1	3	1	2.32193	comp10126_c0	.	.	.	.	.	.	.	.	.	.	.
comp10127_c0_seq1	1.14729	-1.19301	0.761351	1	1	4.16993	3	2.32193	comp10127_c0	.	.	.	.	.	.	.	.	.	.	.
comp10129_c0_seq1	0.717353	-1.71342	1	1	0	3.16993	1.58496	2.80735	comp10129_c0	.	.	.	.	.	.	.	.	.	.	.
comp1013_c0_seq1	1.42489	-1.85298	0.618754	1	0	2.32193	2.32193	2.58496	comp1013_c0	.	.	.	.	.	.	.	.	.	.	.
comp10130_c0_seq1	0.0301205	-1.1311	1	1	2.32193	2.58496	3.16993	3.58496	comp10130_c0	.	.	m.4193	2-352[-]	.	.	.	.	.	.
comp10131_c0_seq1	-1.05667	-1.45058	0.724248	1	2.58496	3.45943	2.32193	1.58496	comp10131_c0	.	.	.	.	.	.	.	.	.	.	.
comp10132_c0_seq1	-1.38466	-1.08045	0.530666	1	3.58496	3.32193	3	1.58496	comp10132_c0	.	.	.	.	.	.	.	.	.	.	.
comp10133_c0_seq1	-0.900352	6.55043	0.556839	1	10.5343	11.8029	10.4512	10.8734	comp10133_c0	sp|Q9UDW1|QCR9_HUMAN^Q9UDW1^Q:359-240,H:23-62^77.5%ID^E:-13.22^RecName: Full=Cytochrome b-c1 complex subunit 9;^Eukaryota; Metazoa; Chordata; Craniata; Vertebrata; Euteleostomi; Mammalia; Eutheria; Euarchontoglires; Primates; Haplorrhini; Catarrhini; Hominidae; Homo	.	.	.	.	.	.	.	.	GO:0005743^cellular_component^mitochondrial inner membrane`GO:0070469^cellular_component^respiratory chain`GO:0008121^molecular_function^ubiquinol-cytochrome-c reductase activity`GO:0006122^biological_process^mitochondrial electron transport, ubiquinol to cytochrome c`GO:0044281^biological_process^small molecule metabolic process	.
comp10134_c0_seq2	5.48831	-1.75236	0.268232	1	-Inf	3.70044	2.80735	-Inf	comp10134_c0	.	.	.	.	.	.	.	.	.	.	.
comp10135_c0_seq1	-0.312205	-0.0614846	0.919306	1	3.58496	5.04439	4.08746	4.08746	comp10135_c0	.	.	.	.	.	.	.	.	.	.	.
comp10136_c0_seq1	1.03502	-1.09717	0.722571	1	1.58496	3.32193	3.45943	3.32193	comp10136_c0	.	.	.	.	.	.	.	.	.	.	.
comp1014_c0_seq1	3.75915	-1.58388	0.629892	1	-Inf	4.16993	1	2	comp1014_c0	.	.	.	.	.	.	.	.	.	.	.
comp10140_c0_seq1	2.53786	-0.718666	0.316287	1	0	4.16993	3.45943	4.16993	comp10140_c0	.	.	.	.	.	.	.	.	.	.	.
comp10141_c0_seq1	-1.10874	-1.67364	0.678345	1	2.32193	2.80735	2	2	comp10141_c0	.	.	.	.	.	.	.	.	.	.	.
comp10142_c0_seq1	2.08614	-1.42864	0.427275	1	0	3.32193	3	2.80735	comp10142_c0	.	.	.	.	.	.	.	.	.	.	.
comp10143_c0_seq1	0.911499	9.14613	0.647421	1	12.0509	14.2862	13.7797	13.8664	comp10143_c0	sp|Q9WU82|CTNB1_RAT^Q9WU82^Q:3133-791,H:1-781^97.8233%ID^E:-10000^RecName: Full=Catenin beta-1;^Eukaryota; Metazoa; Chordata; Craniata; Vertebrata; Euteleostomi; Mammalia; Eutheria; Euarchontoglires; Glires; Rodentia; Sciurognathi; Muroidea; Muridae; Murinae; Rattus	.	m.4194	788-3133[-]	sp|Q0VCX4|CTNB1_BOVIN^Q0VCX4^Q:1-781,H:1-781^98.2074%ID^E:-10000^RecName: Full=Catenin beta-1;^Eukaryota; Metazoa; Chordata; Craniata; Vertebrata; Euteleostomi; Mammalia; Eutheria; Laurasiatheria; Cetartiodactyla; Ruminantia; Pecora; Bovidae; Bovinae; Bos	PF00514.18^Arm^Armadillo/beta-catenin-like repeat^229-262^E:9.4e-07`PF05804.7^KAP^Kinesin-associated protein (KAP)^334-487^E:7e-06`PF00514.18^Arm^Armadillo/beta-catenin-like repeat^350-390^E:2.2e-08`PF00514.18^Arm^Armadillo/beta-catenin-like repeat^432-473^E:9.7e-06`PF00514.18^Arm^Armadillo/beta-catenin-like repeat^584-622^E:1.2e-07	.	.	.	GO:0045177^cellular_component^apical part of cell`GO:0016323^cellular_component^basolateral plasma membrane`GO:0030877^cellular_component^beta-catenin destruction complex`GO:0070369^cellular_component^beta-catenin-TCF7L2 complex`GO:0016342^cellular_component^catenin complex`GO:0005938^cellular_component^cell cortex`GO:0005924^cellular_component^cell-substrate adherens junction`GO:0005813^cellular…
comp10143_c0_seq1	0.911499	9.14613	0.647421	1	12.0509	14.2862	13.7797	13.8664	comp10143_c0	sp|Q9WU82|CTNB1_RAT^Q9WU82^Q:3133-791,H:1-781^97.8233%ID^E:-10000^RecName: Full=Catenin beta-1;^Eukaryota; Metazoa; Chordata; Craniata; Vertebrata; Euteleostomi; Mammalia; Eutheria; Euarchontoglires; Glires; Rodentia; Sciurognathi; Muroidea; Muridae; Murinae; Rattus	.	m.4196	3132-3431[+]	.	.	.	.	.	.
comp10145_c0_seq1	-3.71478	-1.3573	0.102626	1	4	0	1	2.32193	comp10145_c0	.	.	.	.	.	.	.	.	.	.	.
comp10146_c0_seq1	1.89752	-1.70721	0.509609	1	0	3	2.80735	2	comp10146_c0	.	.	.	.	.	.	.	.	.	.	.
comp10147_c0_seq1	-2.15893	1.13189	0.315749	1	5.67243	5.39232	4.32193	5.80735	comp10147_c0	.	.	.	.	.	.	.	.	.	.	.
comp10148_c0_seq1	-0.490991	-0.26806	0.826129	1	3.58496	3.58496	3.90689	4.58496	comp10148_c0	.	.	.	.	.	.	.	.	.	.	.
comp10149_c0_seq1	-7.79423	-1.51954	0.0345909	0.664388	4.32193	-Inf	-Inf	-Inf	comp10149_c0	sp|P41250|SYG_HUMAN^P41250^Q:1-252,H:560-643^84.5238%ID^E:-36.09^RecName: Full=Glycine--tRNA ligase;^Eukaryota; Metazoa; Chordata; Craniata; Vertebrata; Euteleostomi; Mammalia; Eutheria; Euarchontoglires; Primates; Haplorrhini; Catarrhini; Hominidae; Homo	.	.	.	.	.	.	.	COG0423^Glycyl-tRNA synthetase (class II)	GO:0005829^cellular_component^cytosol`GO:0005759^cellular_component^mitochondrial matrix`GO:0030141^cellular_component^secretory granule`GO:0005524^molecular_function^ATP binding`GO:0004820^molecular_function^glycine-tRNA ligase activity`GO:0046983^molecular_function^protein dimerization activity`GO:0008219^biological_process^cell death`GO:0015966^biological_process^diadenosine tetraphosphate bio…	.
comp10150_c0_seq1	0.399798	-0.872983	0.877593	1	2.58496	3.80735	3.80735	2.80735	comp10150_c0	.	.	.	.	.	.	.	.	.	.	.
comp10152_c0_seq1	5.27127	-1.69847	0.267655	1	-Inf	3.70044	2.58496	1	comp10152_c0	.	.	.	.	.	.	.	.	.	.	.
comp10153_c0_seq1	-1.44873	-0.761326	0.488705	1	3.45943	2.58496	2.80735	4.16993	comp10153_c0	.	.	.	.	.	.	.	.	.	.	.
comp10154_c0_seq1	0.658551	-1.17114	0.807835	1	2.32193	2.58496	3.80735	2.58496	comp10154_c0	.	.	.	.	.	.	.	.	.	.	.
comp10155_c0_seq1	1.26039	6.23964	0.412103	1	7.11894	11.1118	9.19722	12.0427	comp10155_c0	.	.	.	.	.	.	.	.	.	.	.
comp10158_c0_seq1	-1.98353	-1.11646	0.417738	1	2.80735	4.45943	1.58496	1.58496	comp10158_c0	.	.	.	.	.	.	.	.	.	.	.
comp10159_c0_seq1	0.862042	1.64172	0.688726	1	4.58496	6.24793	6.26679	6.53916	comp10159_c0	.	.	.	.	.	.	.	.	.	.	.
comp10160_c0_seq1	-0.014473	7.53445	0.993214	1	11.0458	12.391	11.8486	12.3487	comp10160_c0	sp|P84246|H33_RABIT^P84246^Q:950-543,H:1-136^100%ID^E:-69.26^RecName: Full=Histone H3.3;^Eukaryota; Metazoa; Chordata; Craniata; Vertebrata; Euteleostomi; Mammalia; Eutheria; Euarchontoglires; Glires; Lagomorpha; Leporidae; Oryctolagus	.	m.4197	540-950[-]	sp|Q5E9F8|H33_BOVIN^Q5E9F8^Q:1-136,H:1-136^100%ID^E:-70.06^RecName: Full=Histone H3.3;^Eukaryota; Metazoa; Chordata; Craniata; Vertebrata; Euteleostomi; Mammalia; Eutheria; Laurasiatheria; Cetartiodactyla; Ruminantia; Pecora; Bovidae; Bovinae; Bos	PF00125.19^Histone^Core histone H2A/H2B/H3/H4^58-132^E:5.9e-33	.	.	COG2036^Histones H3 and H4	GO:0000786^cellular_component^nucleosome`GO:0005634^cellular_component^nucleus`GO:0003677^molecular_function^DNA binding`GO:0006334^biological_process^nucleosome assembly
comp10161_c0_seq1	5.67693	-1.3476	0.216131	1	-Inf	3.32193	3	3.32193	comp10161_c0	.	.	.	.	.	.	.	.	.	.	.
comp10162_c0_seq1	5.84372	-1.37628	0.181265	1	-Inf	3	3.16993	3.32193	comp10162_c0	.	.	.	.	.	.	.	.	.	.	.
comp10163_c0_seq1	-0.109331	7.11978	0.945361	1	10.1762	13.236	10.8842	11.0908	comp10163_c0	sp|P97825|HN1_MOUSE^P97825^Q:313-245,H:132-154^82.6087%ID^E:-23.4245^RecName: Full=Hematological and neurological expressed 1 protein;^Eukaryota; Metazoa; Chordata; Craniata; Vertebrata; Euteleostomi; Mammalia; Eutheria; Euarchontoglires; Glires; Rodentia; Sciurognathi; Muroidea; Muridae; Murinae; Mus; Mus	.	m.4198	242-706[-]	sp|Q3T0T5|HN1_BOVIN^Q3T0T5^Q:1-154,H:1-154^52.2581%ID^E:-35.26^RecName: Full=Hematological and neurological expressed 1 protein;^Eukaryota; Metazoa; Chordata; Craniata; Vertebrata; Euteleostomi; Mammalia; Eutheria; Laurasiatheria; Cetartiodactyla; Ruminantia; Pecora; Bovidae; Bovinae; Bos	.	.	.	NOG85721^Hematological and neurological expressed 1 protein	GO:0005634^cellular_component^nucleus
comp10165_c0_seq1	1.88494	6.89661	0.23967	1	9.25974	12.2255	11.9622	11.1408	comp10165_c0	.	.	.	.	.	.	.	.	.	.	.
comp10165_c1_seq1	2.25791	5.64606	0.148542	1	6.90689	11.0721	9.98299	10.7591	comp10165_c1	sp|O13024|INCEA_XENLA^O13024^Q:2001-1375,H:318-515^56.8075%ID^E:-149.321^RecName: Full=Inner centromere protein A;^Eukaryota; Metazoa; Chordata; Craniata; Vertebrata; Euteleostomi; Amphibia; Batrachia; Anura; Pipoidea; Pipidae; Xenopodinae; Xenopus; Xenopus	.	m.4199	193-3054[-]	sp|Q0IHP2|INCE_XENTR^Q0IHP2^Q:286-804,H:262-763^63.3645%ID^E:-190.435^RecName: Full=Inner centromere protein;^Eukaryota; Metazoa; Chordata; Craniata; Vertebrata; Euteleostomi; Amphibia; Batrachia; Anura; Pipoidea; Pipidae; Xenopodinae; Xenopus; Silurana	PF12178.3^INCENP_N^Chromosome passenger complex (CPC) protein INCENP N terminal^5-41^E:8.4e-11`PF03941.10^INCENP_ARK-bind^Inner centromere protein, ARK binding region^860-918^E:3e-16	.	.	.	GO:0005694^cellular_component^chromosome`GO:0032133^cellular_component^chromosome passenger complex`GO:0000775^cellular_component^chromosome, centromeric region`GO:0005737^cellular_component^cytoplasm`GO:0005874^cellular_component^microtubule`GO:0005634^cellular_component^nucleus`GO:0005819^cellular_component^spindle`GO:0019901^molecular_function^protein kinase binding`GO:0051301^biological_proce…
comp10166_c0_seq1	0.175216	-1.43657	1	1	1	2.58496	2	3.70044	comp10166_c0	.	.	.	.	.	.	.	.	.	.	.
comp10168_c0_seq1	-5.49807	-1.90176	0.269926	1	2	2.58496	-Inf	2.58496	comp10168_c0	.	.	.	.	.	.	.	.	.	.	.
comp10169_c0_seq1	0.929692	7.41734	0.570845	1	9.55267	13.0128	11.2998	12.4891	comp10169_c0	sp|P18248|PCNA_XENLA^P18248^Q:122-904,H:1-261^93.1034%ID^E:-135.34^RecName: Full=Proliferating cell nuclear antigen;^Eukaryota; Metazoa; Chordata; Craniata; Vertebrata; Euteleostomi; Amphibia; Batrachia; Anura; Pipoidea; Pipidae; Xenopodinae; Xenopus; Xenopus	.	m.4201	122-907[+]	sp|P18248|PCNA_XENLA^P18248^Q:1-261,H:1-261^93.1034%ID^E:-135.55^RecName: Full=Proliferating cell nuclear antigen;^Eukaryota; Metazoa; Chordata; Craniata; Vertebrata; Euteleostomi; Amphibia; Batrachia; Anura; Pipoidea; Pipidae; Xenopodinae; Xenopus; Xenopus	PF00705.13^PCNA_N^Proliferating cell nuclear antigen, N-terminal domain^1-125^E:1.4e-59`PF02144.11^Rad1^Repair protein Rad1/Rec1/Rad17^2-230^E:2.1e-06`PF04139.8^Rad9^Rad9^12-213^E:7e-09`PF02747.10^PCNA_C^Proliferating cell nuclear antigen, C-terminal domain^127-254^E:2e-65	.	.	.	GO:0043626^cellular_component^PCNA complex`GO:0070557^cellular_component^PCNA-p21 complex`GO:0003677^molecular_function^DNA binding`GO:0030337^molecular_function^DNA polymerase processivity factor activity`GO:0006260^biological_process^DNA replication`GO:0006275^biological_process^regulation of DNA replication`GO:0019985^biological_process^translesion synthesis
comp1017_c0_seq1	5.84372	-1.70621	0.184221	1	-Inf	2.80735	3.16993	2	comp1017_c0	.	.	.	.	.	.	.	.	.	.	.
comp10170_c0_seq1	-1.15077	7.37131	0.482261	1	11.5551	11.7997	11.2216	12.0881	comp10170_c0	sp|Q6P6Q2|K2C5_RAT^Q6P6Q2^Q:426-1,H:120-258^62.6761%ID^E:-42.13^RecName: Full=Keratin, type II cytoskeletal 5;^Eukaryota; Metazoa; Chordata; Craniata; Vertebrata; Euteleostomi; Mammalia; Eutheria; Euarchontoglires; Glires; Rodentia; Sciurognathi; Muroidea; Muridae; Murinae; Rattus	.	m.4204	1-693[-]	sp|Q922U2|K2C5_MOUSE^Q922U2^Q:44-231,H:59-256^56.2189%ID^E:-48.68^RecName: Full=Keratin, type II cytoskeletal 5;^Eukaryota; Metazoa; Chordata; Craniata; Vertebrata; Euteleostomi; Mammalia; Eutheria; Euarchontoglires; Glires; Rodentia; Sciurognathi; Muroidea; Muridae; Murinae; Mus; Mus	PF00038.16^Filament^Intermediate filament protein^133-231^E:1e-27	.	.	NOG146769^Protein involved in intermediate filament-based process	GO:0045095^cellular_component^keratin filament`GO:0005739^cellular_component^mitochondrion`GO:0005886^cellular_component^plasma membrane`GO:0005198^molecular_function^structural molecule activity
comp10173_c0_seq1	0.754394	-0.777158	0.757856	1	2	4.39232	3.58496	3.16993	comp10173_c0	.	.	.	.	.	.	.	.	.	.	.
comp10174_c0_seq1	0.881544	7.45349	0.591777	1	10.1124	12.5866	11.8114	12.4798	comp10174_c0	sp|Q66KV4|BAFB_XENLA^Q66KV4^Q:1496-1236,H:3-89^90.8046%ID^E:-41.19^RecName: Full=Barrier-to-autointegration factor B;^Eukaryota; Metazoa; Chordata; Craniata; Vertebrata; Euteleostomi; Amphibia; Batrachia; Anura; Pipoidea; Pipidae; Xenopodinae; Xenopus; Xenopus	.	.	.	.	.	.	.	.	GO:0005694^cellular_component^chromosome`GO:0005634^cellular_component^nucleus`GO:0003677^molecular_function^DNA binding	.
comp10175_c0_seq1	-1.6677	-1.5172	0.769573	1	1	4.08746	0	2.32193	comp10175_c0	.	.	.	.	.	.	.	.	.	.	.
comp10176_c0_seq1	-1.78504	-0.131246	0.478897	1	3.32193	4.9542	2.32193	4.85798	comp10176_c0	.	.	.	.	.	.	.	.	.	.	.
comp10179_c0_seq1	0.74162	-1.85544	0.869427	1	1	2.58496	2.58496	1.58496	comp10179_c0	sp|B8JK76|SDCG8_DANRE^B8JK76^Q:109-5,H:201-235^65.7143%ID^E:-5.93^RecName: Full=Serologically defined colon cancer antigen 8 homolog;^Eukaryota; Metazoa; Chordata; Craniata; Vertebrata; Euteleostomi; Actinopterygii; Neopterygii; Teleostei; Ostariophysi; Cypriniformes; Cyprinidae; Danio	.	.	.	.	.	.	.	NOG69678^Serologically defined colon cancer antigen 8 protein	GO:0030054^cellular_component^cell junction`GO:0005814^cellular_component^centriole	.
comp10180_c0_seq1	-7.47393	-1.24194	0.0448431	0.748651	4	3.16993	-Inf	1.58496	comp10180_c0	.	.	.	.	.	.	.	.	.	.	.
comp10181_c0_seq1	0.677035	-0.286886	0.779786	1	2.58496	4.70044	4.08746	4.16993	comp10181_c0	.	.	.	.	.	.	.	.	.	.	.
comp10182_c0_seq1	0.17763	-1.26391	1	1	1.58496	0	2.58496	4.16993	comp10182_c0	.	.	.	.	.	.	.	.	.	.	.
comp10183_c0_seq1	0.399798	-0.943266	0.877621	1	2.58496	3.32193	3.80735	3	comp10183_c0	.	.	.	.	.	.	.	.	.	.	.
comp10184_c0_seq1	-0.809129	-0.600937	0.718468	1	3.58496	4.70044	3.58496	1	comp10184_c0	.	.	.	.	.	.	.	.	.	.	.
comp10186_c0_seq1	-0.7705	-1.754	0.770718	1	1	3.90689	1	0	comp10186_c0	.	.	.	.	.	.	.	.	.	.	.
comp10189_c0_seq1	1.47697	-0.626094	0.552506	1	1.58496	4.45943	3.90689	3.58496	comp10189_c0	sp|Q96JJ3|ELMO2_HUMAN^Q96JJ3^Q:1-372,H:571-694^91.9355%ID^E:-67.4736^RecName: Full=Engulfment and cell motility protein 2;^Eukaryota; Metazoa; Chordata; Craniata; Vertebrata; Euteleostomi; Mammalia; Eutheria; Euarchontoglires; Primates; Haplorrhini; Catarrhini; Hominidae; Homo	.	m.4207	1-453[+]	sp|Q96JJ3|ELMO2_HUMAN^Q96JJ3^Q:1-150,H:571-720^93.3333%ID^E:-78.32^RecName: Full=Engulfment and cell motility protein 2;^Eukaryota; Metazoa; Chordata; Craniata; Vertebrata; Euteleostomi; Mammalia; Eutheria; Euarchontoglires; Primates; Haplorrhini; Catarrhini; Hominidae; Homo	.	.	.	.	GO:0005856^cellular_component^cytoskeleton`GO:0005829^cellular_component^cytosol`GO:0016020^cellular_component^membrane`GO:0005543^molecular_function^phospholipid binding`GO:0010333^molecular_function^terpene synthase activity`GO:0006915^biological_process^apoptotic process`GO:0060326^biological_process^cell chemotaxis`GO:0006909^biological_process^phagocytosis
comp10190_c0_seq1	-0.521499	-0.978296	0.825308	1	3.16993	3.70044	3.45943	2	comp10190_c0	.	.	.	.	.	.	.	.	.	.	.
comp10191_c0_seq1	-2.97934	-0.558058	0.191299	1	4.52356	2.80735	2.32193	3.58496	comp10191_c0	.	.	.	.	.	.	.	.	.	.	.
comp10192_c0_seq1	-1.05667	-1.45058	0.724248	1	2.58496	3.45943	2.32193	1.58496	comp10192_c0	sp|Q9HSB8|Y309_HALSA^Q9HSB8^Q:74-184,H:57-93^45.9459%ID^E:-0.26^RecName: Full=Uncharacterized aldolase VNG_0309C;^Archaea; Euryarchaeota; Halobacteria; Halobacteriales; Halobacteriaceae; Halobacterium	.	.	.	.	.	.	.	COG1830^DhnA-type fructose-1,6-bisphosphate aldolase and related enzymes	GO:0016836^molecular_function^hydro-lyase activity`GO:0008152^biological_process^metabolic process	.
comp10193_c0_seq1	-1.18993	-1.08896	0.704695	1	2	4.70044	1.58496	2	comp10193_c0	.	.	.	.	.	.	.	.	.	.	.
comp10194_c0_seq1	0.378036	2.41396	0.853802	1	5.78136	7.96578	6.97728	6.18982	comp10194_c0	sp|Q9R0Q2|LT4R1_RAT^Q9R0Q2^Q:325-1032,H:20-251^46.1864%ID^E:-64.6425^RecName: Full=Leukotriene B4 receptor 1;^Eukaryota; Metazoa; Chordata; Craniata; Vertebrata; Euteleostomi; Mammalia; Eutheria; Euarchontoglires; Glires; Rodentia; Sciurognathi; Muroidea; Muridae; Murinae; Rattus	.	m.4210	268-1350[+]	sp|Q9R0Q2|LT4R1_RAT^Q9R0Q2^Q:268-317,H:264-313^48%ID^E:-65.1059^RecName: Full=Leukotriene B4 receptor 1;^Eukaryota; Metazoa; Chordata; Craniata; Vertebrata; Euteleostomi; Mammalia; Eutheria; Euarchontoglires; Glires; Rodentia; Sciurognathi; Muroidea; Muridae; Murinae; Rattus	PF00001.16^7tm_1^7 transmembrane receptor (rhodopsin family)^37-289^E:1.3e-42	.	ExpAA=154.19^PredHel=7^Topology=o25-47i59-81o96-117i137-159o187-209i229-251o271-293i	.	GO:0016021^cellular_component^integral to membrane`GO:0005886^cellular_component^plasma membrane`GO:0001632^molecular_function^leukotriene B4 receptor activity`GO:0004974^molecular_function^leukotriene receptor activity`GO:0006954^biological_process^inflammatory response
comp10197_c0_seq1	5.84372	-1.51725	0.182407	1	-Inf	3.90689	3.16993	0	comp10197_c0	.	.	.	.	.	.	.	.	.	.	.
comp10198_c0_seq1	-0.785489	-1.58146	0.83265	1	1.58496	2.80735	1.58496	3.16993	comp10198_c0	sp|A0A8J8|ANGP2_CANFA^A0A8J8^Q:3-242,H:230-309^72.5%ID^E:-27.39^RecName: Full=Angiopoietin-2;^Eukaryota; Metazoa; Chordata; Craniata; Vertebrata; Euteleostomi; Mammalia; Eutheria; Laurasiatheria; Carnivora; Caniformia; Canidae; Canis	.	.	.	.	.	.	.	.	GO:0005615^cellular_component^extracellular space`GO:0046872^molecular_function^metal ion binding`GO:0001525^biological_process^angiogenesis`GO:0030154^biological_process^cell differentiation`GO:0016525^biological_process^negative regulation of angiogenesis`GO:0043537^biological_process^negative regulation of blood vessel endothelial cell migration`GO:0010812^biological_process^negative regulatio…	.
comp10199_c0_seq1	0.486037	-1.76322	1	1	1	3.16993	2.32193	1.58496	comp10199_c0	.	.	.	.	.	.	.	.	.	.	.
comp102_c0_seq1	0.34565	-1.26151	0.907124	1	2	2.80735	3.16993	3.16993	comp102_c0	.	.	.	.	.	.	.	.	.	.	.
comp1020_c0_seq1	0.74162	-1.7165	0.868903	1	1	3.32193	2.58496	1	comp1020_c0	.	.	.	.	.	.	.	.	.	.	.
comp10200_c0_seq1	-0.467159	6.57228	0.759658	1	10.4898	11.7004	10.84	10.8114	comp10200_c0	sp|Q99643|C560_HUMAN^Q99643^Q:3215-2751,H:1-155^69.6774%ID^E:-59.16^RecName: Full=Succinate dehydrogenase cytochrome b560 subunit, mitochondrial;^Eukaryota; Metazoa; Chordata; Craniata; Vertebrata; Euteleostomi; Mammalia; Eutheria; Euarchontoglires; Primates; Haplorrhini; Catarrhini; Hominidae; Homo	.	m.4211	2706-3233[-]	sp|Q99643|C560_HUMAN^Q99643^Q:7-175,H:1-169^68.0473%ID^E:-64.11^RecName: Full=Succinate dehydrogenase cytochrome b560 subunit, mitochondrial;^Eukaryota; Metazoa; Chordata; Craniata; Vertebrata; Euteleostomi; Mammalia; Eutheria; Euarchontoglires; Primates; Haplorrhini; Catarrhini; Hominidae; Homo	PF01127.17^Sdh_cyt^Succinate dehydrogenase/Fumarate reductase transmembrane subunit^53-171^E:7.3e-27	.	ExpAA=59.65^PredHel=3^Topology=i81-103o113-135i155-174o	COG2009^Succinate dehydrogenase/fumarate reductase, cytochrome b subunit	GO:0016021^cellular_component^integral to membrane`GO:0005749^cellular_component^mitochondrial respiratory chain complex II`GO:0009055^molecular_function^electron carrier activity`GO:0020037^molecular_function^heme binding`GO:0046872^molecular_function^metal ion binding`GO:0000104^molecular_function^succinate dehydrogenase activity`GO:0022904^biological_process^respiratory electron transport chai…
comp10201_c0_seq1	2.02467	-0.625809	0.361353	1	1.58496	3	4.45943	4	comp10201_c0	.	.	.	.	.	.	.	.	.	.	.
comp10204_c0_seq1	-0.289237	1.20878	0.903519	1	5.08746	5.88264	5.61471	5.64386	comp10204_c0	.	.	.	.	.	.	.	.	.	.	.
comp10205_c0_seq1	-2.34201	-1.01617	0.309541	1	3.16993	3.80735	1.58496	3.32193	comp10205_c0	sp|Q08DL5|COE2_BOVIN^Q08DL5^Q:1-381,H:352-480^93.0233%ID^E:-59.85^RecName: Full=Transcription factor COE2;^Eukaryota; Metazoa; Chordata; Craniata; Vertebrata; Euteleostomi; Mammalia; Eutheria; Laurasiatheria; Cetartiodactyla; Ruminantia; Pecora; Bovidae; Bovinae; Bos	.	m.4212	1-384[+]	sp|Q08DL5|COE2_BOVIN^Q08DL5^Q:1-127,H:352-480^93.0233%ID^E:-59.85^RecName: Full=Transcription factor COE2;^Eukaryota; Metazoa; Chordata; Craniata; Vertebrata; Euteleostomi; Mammalia; Eutheria; Laurasiatheria; Cetartiodactyla; Ruminantia; Pecora; Bovidae; Bovinae; Bos	.	.	.	.	GO:0005634^cellular_component^nucleus`GO:0003677^molecular_function^DNA binding`GO:0046872^molecular_function^metal ion binding`GO:0007275^biological_process^multicellular organismal development`GO:0006355^biological_process^regulation of transcription, DNA-dependent`GO:0006351^biological_process^transcription, DNA-dependent
comp10206_c0_seq1	0.17763	-1.59818	1	1	1.58496	3.16993	2.58496	2	comp10206_c0	.	.	.	.	.	.	.	.	.	.	.
comp10207_c0_seq1	-1.76421	-1.87371	0.476074	1	2.58496	2	1.58496	1.58496	comp10207_c0	.	.	.	.	.	.	.	.	.	.	.
comp10208_c0_seq1	0.175216	-1.94078	1	1	1	3.16993	2	0	comp10208_c0	.	.	.	.	.	.	.	.	.	.	.
comp10209_c0_seq1	0.559691	7.03556	0.722561	1	10.5746	11.5957	11.9516	11.4231	comp10209_c0	.	.	.	.	.	.	.	.	.	.	.
comp10210_c0_seq1	-0.482389	-1.57268	1	1	2	3.70044	2.32193	0	comp10210_c0	.	.	.	.	.	.	.	.	.	.	.
comp10211_c0_seq1	-9.49017	0.110803	0.00750611	0.423867	6.02237	-Inf	-Inf	-Inf	comp10211_c0	.	.	.	.	.	.	.	.	.	.	.
comp10212_c0_seq1	0.760007	-0.528303	0.718793	1	2.80735	4.08746	4.39232	3.16993	comp10212_c0	.	.	.	.	.	.	.	.	.	.	.
comp10213_c0_seq1	-3.93877	-1.24918	0.183947	1	3.32193	2.32193	0	3.58496	comp10213_c0	.	.	.	.	.	.	.	.	.	.	.
comp10214_c0_seq1	-0.29847	-0.339548	0.928701	1	2.80735	5.52356	3.32193	2.58496	comp10214_c0	.	.	.	.	.	.	.	.	.	.	.
comp10216_c0_seq1	0.00261045	7.94954	0.998973	1	11.4858	13.3295	12.3058	12.2556	comp10216_c0	sp|Q99MN1|SYK_MOUSE^Q99MN1^Q:151-1800,H:37-589^84.2676%ID^E:-279.14^RecName: Full=Lysine--tRNA ligase;^Eukaryota; Metazoa; Chordata; Craniata; Vertebrata; Euteleostomi; Mammalia; Eutheria; Euarchontoglires; Glires; Rodentia; Sciurognathi; Muroidea; Muridae; Murinae; Mus; Mus	.	m.4213	1-1809[+]	sp|Q99MN1|SYK_MOUSE^Q99MN1^Q:25-600,H:11-589^84.456%ID^E:-291.83^RecName: Full=Lysine--tRNA ligase;^Eukaryota; Metazoa; Chordata; Craniata; Vertebrata; Euteleostomi; Mammalia; Eutheria; Euarchontoglires; Glires; Rodentia; Sciurognathi; Muroidea; Muridae; Murinae; Mus; Mus	PF01336.20^tRNA_anti^OB-fold nucleic acid binding domain^135-214^E:4.5e-13`PF00152.15^tRNA-synt_2^tRNA synthetases class II (D, K and N)^232-583^E:4.6e-92	.	.	COG1190^Lysyl-tRNA synthetase (class II)	GO:0005739^cellular_component^mitochondrion`GO:0005524^molecular_function^ATP binding`GO:0004824^molecular_function^lysine-tRNA ligase activity`GO:0046872^molecular_function^metal ion binding`GO:0003676^molecular_function^nucleic acid binding`GO:0006430^biological_process^lysyl-tRNA aminoacylation
comp10217_c0_seq1	-0.213899	1.83284	0.932769	1	4.75489	7.70736	5.35755	6.22882	comp10217_c0	sp|Q52L34|MTHSD_XENLA^Q52L34^Q:840-595,H:312-393^59.7561%ID^E:-133.405^RecName: Full=Methenyltetrahydrofolate synthase domain-containing protein;^Eukaryota; Metazoa; Chordata; Craniata; Vertebrata; Euteleostomi; Amphibia; Batrachia; Anura; Pipoidea; Pipidae; Xenopodinae; Xenopus; Xenopus	.	m.4214	574-1797[-]	sp|Q52L34|MTHSD_XENLA^Q52L34^Q:320-401,H:312-393^59.7561%ID^E:-141.454^RecName: Full=Methenyltetrahydrofolate synthase domain-containing protein;^Eukaryota; Metazoa; Chordata; Craniata; Vertebrata; Euteleostomi; Amphibia; Batrachia; Anura; Pipoidea; Pipidae; Xenopodinae; Xenopus; Xenopus	PF01812.15^5-FTHF_cyc-lig^5-formyltetrahydrofolate cyclo-ligase family^15-212^E:7.9e-29	.	.	.	GO:0030272^molecular_function^5-formyltetrahydrofolate cyclo-ligase activity`GO:0005524^molecular_function^ATP binding`GO:0003723^molecular_function^RNA binding`GO:0009396^biological_process^folic acid-containing compound biosynthetic process
comp10217_c0_seq1	-0.213899	1.83284	0.932769	1	4.75489	7.70736	5.35755	6.22882	comp10217_c0	sp|Q52L34|MTHSD_XENLA^Q52L34^Q:840-595,H:312-393^59.7561%ID^E:-133.405^RecName: Full=Methenyltetrahydrofolate synthase domain-containing protein;^Eukaryota; Metazoa; Chordata; Craniata; Vertebrata; Euteleostomi; Amphibia; Batrachia; Anura; Pipoidea; Pipidae; Xenopodinae; Xenopus; Xenopus	.	m.4215	1681-1983[+]	.	.	.	.	.	.
comp10217_c0_seq2	1.09763	1.56885	0.604064	1	4.75489	6.16993	6.67243	5.75489	comp10217_c0	sp|Q52L34|MTHSD_XENLA^Q52L34^Q:1371-973,H:141-271^72.1805%ID^E:-122.573^RecName: Full=Methenyltetrahydrofolate synthase domain-containing protein;^Eukaryota; Metazoa; Chordata; Craniata; Vertebrata; Euteleostomi; Amphibia; Batrachia; Anura; Pipoidea; Pipidae; Xenopodinae; Xenopus; Xenopus	.	m.4216	574-1797[-]	sp|Q52L34|MTHSD_XENLA^Q52L34^Q:320-401,H:312-393^59.7561%ID^E:-130.587^RecName: Full=Methenyltetrahydrofolate synthase domain-containing protein;^Eukaryota; Metazoa; Chordata; Craniata; Vertebrata; Euteleostomi; Amphibia; Batrachia; Anura; Pipoidea; Pipidae; Xenopodinae; Xenopus; Xenopus	PF01812.15^5-FTHF_cyc-lig^5-formyltetrahydrofolate cyclo-ligase family^15-212^E:1.6e-30	.	.	.	GO:0030272^molecular_function^5-formyltetrahydrofolate cyclo-ligase activity`GO:0005524^molecular_function^ATP binding`GO:0003723^molecular_function^RNA binding`GO:0009396^biological_process^folic acid-containing compound biosynthetic process
comp10218_c0_seq1	-0.29847	-0.94925	0.928198	1	2.80735	3.58496	3.32193	3.16993	comp10218_c0	.	.	.	.	.	.	.	.	.	.	.
comp10219_c0_seq1	-2.09586	-0.704002	0.380875	1	3.32193	4.58496	2	3.32193	comp10219_c0	.	.	.	.	.	.	.	.	.	.	.
comp10220_c0_seq1	-0.68458	-0.245231	0.757849	1	3.45943	4.9542	3.58496	3.90689	comp10220_c0	.	.	.	.	.	.	.	.	.	.	.
comp10221_c0_seq1	3.1586	-0.507118	0.183672	1	0	5.08746	4.08746	3	comp10221_c0	.	.	.	.	.	.	.	.	.	.	.
comp10222_c0_seq1	1.41037	-0.130322	0.527586	1	2	4.58496	4.24793	4.80735	comp10222_c0	.	.	m.4218	38-337[+]	.	.	.	.	.	.
comp10224_c0_seq1	-1.46634	-1.34941	0.554274	1	3	3.45943	2.32193	1.58496	comp10224_c0	.	.	.	.	.	.	.	.	.	.	.
comp10225_c0_seq1	-1.73893	-1.59824	0.508494	1	2	3.32193	1	2.58496	comp10225_c0	.	.	.	.	.	.	.	.	.	.	.
comp10226_c0_seq1	1.72282	-0.932327	0.543473	1	1	3.32193	3.58496	3.90689	comp10226_c0	.	.	.	.	.	.	.	.	.	.	.
comp10227_c0_seq1	-0.542336	-1.06165	0.799301	1	2.32193	3.58496	2.58496	3.58496	comp10227_c0	.	.	.	.	.	.	.	.	.	.	.
comp10228_c0_seq1	-3.93877	-1.04178	0.182804	1	3.32193	4.58496	0	1	comp10228_c0	.	.	.	.	.	.	.	.	.	.	.
comp10230_c0_seq1	-0.00986995	-0.492593	1	1	3	3.58496	3.80735	4.32193	comp10230_c0	.	.	.	.	.	.	.	.	.	.	.
comp10231_c0_seq1	0	-1.40168	1	1	-Inf	4.90689	-Inf	-Inf	comp10231_c0	sp|Q6IFU8|K1C17_RAT^Q6IFU8^Q:176-90,H:399-427^58.6207%ID^E:-2.57^RecName: Full=Keratin, type I cytoskeletal 17;^Eukaryota; Metazoa; Chordata; Craniata; Vertebrata; Euteleostomi; Mammalia; Eutheria; Euarchontoglires; Glires; Rodentia; Sciurognathi; Muroidea; Muridae; Murinae; Rattus	.	.	.	.	.	.	.	NOG148784^Protein involved in cell differentiation involved in embryonic placenta development	GO:0071944^cellular_component^cell periphery`GO:0005737^cellular_component^cytoplasm`GO:0045095^cellular_component^keratin filament`GO:0032395^molecular_function^MHC class II receptor activity`GO:0005200^molecular_function^structural constituent of cytoskeleton`GO:0045109^biological_process^intermediate filament organization`GO:0045103^biological_process^intermediate filament-based process`GO:003…	.
comp10232_c0_seq1	2.33955	1.36186	0.301531	1	3	6.64386	6.16993	5.88264	comp10232_c0	.	.	.	.	.	.	.	.	.	.	.
comp10236_c0_seq1	1.09278	2.46884	0.591662	1	5.24793	6.89482	7.15987	7.50779	comp10236_c0	sp|P23470|PTPRG_HUMAN^P23470^Q:2237-696,H:1-514^84.0467%ID^E:-297.634^RecName: Full=Receptor-type tyrosine-protein phosphatase gamma;^Eukaryota; Metazoa; Chordata; Craniata; Vertebrata; Euteleostomi; Mammalia; Eutheria; Euarchontoglires; Primates; Haplorrhini; Catarrhini; Hominidae; Homo	.	m.4219	3-2237[-]	sp|P23470|PTPRG_HUMAN^P23470^Q:1-640,H:1-640^80.4688%ID^E:-10000^RecName: Full=Receptor-type tyrosine-protein phosphatase gamma;^Eukaryota; Metazoa; Chordata; Craniata; Vertebrata; Euteleostomi; Mammalia; Eutheria; Euarchontoglires; Primates; Haplorrhini; Catarrhini; Hominidae; Homo	PF00194.16^Carb_anhydrase^Eukaryotic-type carbonic anhydrase^60-320^E:1.5e-57`PF00041.16^fn3^Fibronectin type III domain^349-429^E:6e-09	sigP:1^26^0.657^YES	.	COG5599^Protein tyrosine phosphatase	GO:0005887^cellular_component^integral to plasma membrane`GO:0005001^molecular_function^transmembrane receptor protein tyrosine phosphatase activity`GO:0007169^biological_process^transmembrane receptor protein tyrosine kinase signaling pathway
comp10238_c0_seq1	1.94251	-0.992556	0.45022	1	1	3.16993	3.80735	3.58496	comp10238_c0	.	.	.	.	.	.	.	.	.	.	.
comp10239_c0_seq1	0.868414	-1.26804	0.698994	1	2	1	3.70044	3.16993	comp10239_c0	sp|Q9STG6|DUT_ARATH^Q9STG6^Q:3-176,H:85-143^45.7627%ID^E:-6.39^RecName: Full=Deoxyuridine 5'-triphosphate nucleotidohydrolase;^Eukaryota; Viridiplantae; Streptophyta; Embryophyta; Tracheophyta; Spermatophyta; Magnoliophyta; eudicotyledons; core eudicotyledons; rosids; malvids; Brassicales; Brassicaceae; Camelineae; Arabidopsis	.	.	.	.	.	.	.	COG0756^dUTPase	GO:0005829^cellular_component^cytosol`GO:0004170^molecular_function^dUTP diphosphatase activity`GO:0000287^molecular_function^magnesium ion binding`GO:0006281^biological_process^DNA repair`GO:0006226^biological_process^dUMP biosynthetic process`GO:0046080^biological_process^dUTP metabolic process	.
comp1024_c0_seq1	-0.136668	-1.26472	1	1	2.32193	3.80735	3	1.58496	comp1024_c0	sp|Q8IVT5|KSR1_HUMAN^Q8IVT5^Q:16-255,H:27-106^65%ID^E:-21.7^RecName: Full=Kinase suppressor of Ras 1;^Eukaryota; Metazoa; Chordata; Craniata; Vertebrata; Euteleostomi; Mammalia; Eutheria; Euarchontoglires; Primates; Haplorrhini; Catarrhini; Hominidae; Homo	.	.	.	.	.	.	.	COG0515^Serine/threonine protein kinase	GO:0005789^cellular_component^endoplasmic reticulum membrane`GO:0005622^cellular_component^intracellular`GO:0005524^molecular_function^ATP binding`GO:0046872^molecular_function^metal ion binding`GO:0004672^molecular_function^protein kinase activity`GO:0004674^molecular_function^protein serine/threonine kinase activity`GO:0007265^biological_process^Ras protein signal transduction	.
comp10240_c0_seq1	1.31408	-0.943737	0.674368	1	1	4.45943	3.16993	3	comp10240_c0	.	.	.	.	.	.	.	.	.	.	.
comp10241_c0_seq1	6.12865	-1.81084	0.158793	1	-Inf	2.58496	3.45943	0	comp10241_c0	.	.	.	.	.	.	.	.	.	.	.
comp10242_c0_seq1	-0.221499	-1.67571	1	1	1	2.32193	1.58496	3.32193	comp10242_c0	.	.	.	.	.	.	.	.	.	.	.
comp10243_c0_seq1	0	-2.16971	1	1	-Inf	3.45943	-Inf	1	comp10243_c0	.	.	.	.	.	.	.	.	.	.	.
comp10245_c0_seq1	-0.395421	-1.34778	0.919321	1	2.58496	3.16993	3	2	comp10245_c0	.	.	.	.	.	.	.	.	.	.	.
comp10246_c0_seq1	-4.52965	-1.62027	0.445136	1	1	4.16993	-Inf	1.58496	comp10246_c0	.	.	.	.	.	.	.	.	.	.	.
comp10249_c0_seq1	-1.26337	7.04577	0.428323	1	11.1867	12.4846	10.7406	11.0244	comp10249_c0	sp|P00125|CY1_BOVIN^P00125^Q:250-1014,H:71-325^81.5686%ID^E:-126.81^RecName: Full=Cytochrome c1, heme protein, mitochondrial;^Eukaryota; Metazoa; Chordata; Craniata; Vertebrata; Euteleostomi; Mammalia; Eutheria; Laurasiatheria; Cetartiodactyla; Ruminantia; Pecora; Bovidae; Bovinae; Bos	.	m.4222	1-1017[+]	sp|P00125|CY1_BOVIN^P00125^Q:41-338,H:26-325^77%ID^E:-136.31^RecName: Full=Cytochrome c1, heme protein, mitochondrial;^Eukaryota; Metazoa; Chordata; Craniata; Vertebrata; Euteleostomi; Mammalia; Eutheria; Laurasiatheria; Cetartiodactyla; Ruminantia; Pecora; Bovidae; Bovinae; Bos	PF02167.10^Cytochrom_C1^Cytochrome C1 family^109-325^E:5.5e-83	.	.	COG2857^Cytochrome c1	GO:0030054^cellular_component^cell junction`GO:0016021^cellular_component^integral to membrane`GO:0005743^cellular_component^mitochondrial inner membrane`GO:0070469^cellular_component^respiratory chain`GO:0009055^molecular_function^electron carrier activity`GO:0020037^molecular_function^heme binding`GO:0005506^molecular_function^iron ion binding`GO:0022900^biological_process^electron transport ch…
comp1025_c0_seq1	-2.05446	-1.88799	0.372214	1	2.32193	2.32193	1	2	comp1025_c0	.	.	.	.	.	.	.	.	.	.	.
comp10250_c0_seq1	5.84372	-1.1405	0.179852	1	-Inf	3.80735	3.16993	3.45943	comp10250_c0	.	.	.	.	.	.	.	.	.	.	.
comp10251_c0_seq1	-0.366441	-0.371116	0.864225	1	3.45943	3.80735	3.90689	4.24793	comp10251_c0	.	.	.	.	.	.	.	.	.	.	.
comp10252_c0_seq1	-7.86431	-1.46136	0.0310772	0.626411	4.39232	-Inf	-Inf	-Inf	comp10252_c0	.	.	.	.	.	.	.	.	.	.	.
comp10254_c0_seq1	5.99321	-1.6178	0.156853	1	-Inf	3.16993	3.32193	1.58496	comp10254_c0	.	.	.	.	.	.	.	.	.	.	.
comp10256_c0_seq1	3.1586	-0.258753	0.186381	1	0	5.70044	4.08746	2.58496	comp10256_c0	.	.	.	.	.	.	.	.	.	.	.
comp10257_c0_seq1	1.67276	6.28509	0.27779	1	8.82655	11.9233	11.3168	9.96434	comp10257_c0	sp|P79251|VATG1_BOVIN^P79251^Q:652-407,H:37-118^63.4146%ID^E:-34.6975^RecName: Full=V-type proton ATPase subunit G 1;^Eukaryota; Metazoa; Chordata; Craniata; Vertebrata; Euteleostomi; Mammalia; Eutheria; Laurasiatheria; Cetartiodactyla; Ruminantia; Pecora; Bovidae; Bovinae; Bos	.	m.4226	404-760[-]	sp|P79251|VATG1_BOVIN^P79251^Q:1-118,H:1-118^72.0339%ID^E:-42.58^RecName: Full=V-type proton ATPase subunit G 1;^Eukaryota; Metazoa; Chordata; Craniata; Vertebrata; Euteleostomi; Mammalia; Eutheria; Laurasiatheria; Cetartiodactyla; Ruminantia; Pecora; Bovidae; Bovinae; Bos	PF03179.10^V-ATPase_G^Vacuolar (H+)-ATPase G subunit^3-106^E:3.5e-36	.	.	.	GO:0005829^cellular_component^cytosol`GO:0005886^cellular_component^plasma membrane`GO:0016471^cellular_component^vacuolar proton-transporting V-type ATPase complex`GO:0016820^molecular_function^hydrolase activity, acting on acid anhydrides, catalyzing transmembrane movement of substances`GO:0015992^biological_process^proton transport
comp10258_c0_seq1	-2.6289	-0.553356	0.26188	1	3.45943	5.12928	1.58496	2.80735	comp10258_c0	.	.	.	.	.	.	.	.	.	.	.
comp10259_c0_seq1	-8.22551	-1.14707	0.0213227	0.54117	4.75489	-Inf	-Inf	-Inf	comp10259_c0	sp|Q5RCT4|CSRP1_PONAB^Q5RCT4^Q:334-35,H:94-193^77%ID^E:-43.74^RecName: Full=Cysteine and glycine-rich protein 1;^Eukaryota; Metazoa; Chordata; Craniata; Vertebrata; Euteleostomi; Mammalia; Eutheria; Euarchontoglires; Primates; Haplorrhini; Catarrhini; Hominidae; Pongo	.	m.4228	1-333[-]	.	.	.	.	.	.
comp1026_c0_seq1	-1.76421	-1.92881	0.476834	1	2.58496	1.58496	1.58496	1.58496	comp1026_c0	.	.	.	.	.	.	.	.	.	.	.
comp10260_c0_seq1	-0.0795486	-1.11249	1	1	3.16993	0	3.90689	2.58496	comp10260_c0	.	.	.	.	.	.	.	.	.	.	.
comp10261_c0_seq1	0.17763	-0.695351	1	1	1.58496	4.90689	2.58496	3.58496	comp10261_c0	.	.	m.4230	75-440[-]	.	.	.	.	.	.
comp10262_c0_seq1	-0.728847	-1.94562	1	1	0	3.16993	0	2.32193	comp10262_c0	.	.	.	.	.	.	.	.	.	.	.
comp10264_c0_seq1	4.70486	-1.65115	0.445397	1	-Inf	2.80735	2	3.32193	comp10264_c0	.	.	.	.	.	.	.	.	.	.	.
comp10265_c0_seq1	-1.31241	-1.2663	0.559557	1	3.32193	2.80735	2.80735	2	comp10265_c0	.	.	.	.	.	.	.	.	.	.	.
comp10266_c0_seq1	5.84372	-1.52461	0.182472	1	-Inf	4	3.16993	-Inf	comp10266_c0	.	.	.	.	.	.	.	.	.	.	.
comp10267_c0_seq1	3.07197	-0.853109	0.200534	1	0	4.39232	4	2.58496	comp10267_c0	.	.	.	.	.	.	.	.	.	.	.
comp10268_c0_seq1	0.568596	2.08902	0.787229	1	5.2854	7.01123	6.67243	6.74147	comp10268_c0	.	.	.	.	.	.	.	.	.	.	.
comp10269_c0_seq1	-8.22551	-1.14707	0.0213227	0.54117	4.75489	-Inf	-Inf	-Inf	comp10269_c0	sp|P22314|UBA1_HUMAN^P22314^Q:2-211,H:707-776^78.5714%ID^E:-29.94^RecName: Full=Ubiquitin-like modifier-activating enzyme 1;^Eukaryota; Metazoa; Chordata; Craniata; Vertebrata; Euteleostomi; Mammalia; Eutheria; Euarchontoglires; Primates; Haplorrhini; Catarrhini; Hominidae; Homo	.	.	.	.	.	.	.	COG0476^Dinucleotide-utilizing enzymes involved in molybdopterin and thiamine biosynthesis family 2	GO:0005524^molecular_function^ATP binding`GO:0016874^molecular_function^ligase activity`GO:0008641^molecular_function^small protein activating enzyme activity`GO:0008219^biological_process^cell death`GO:0016567^biological_process^protein ubiquitination	.
comp1027_c0_seq1	-2.63613	-1.86556	0.511372	1	2	3.16993	0	1.58496	comp1027_c0	.	.	.	.	.	.	.	.	.	.	.
comp10270_c0_seq1	-5.46632	-0.898008	0.0460049	0.75986	4.85798	2	0	-Inf	comp10270_c0	sp|Q61879|MYH10_MOUSE^Q61879^Q:222-1,H:456-529^95.9459%ID^E:-36.08^RecName: Full=Myosin-10;^Eukaryota; Metazoa; Chordata; Craniata; Vertebrata; Euteleostomi; Mammalia; Eutheria; Euarchontoglires; Glires; Rodentia; Sciurognathi; Muroidea; Muridae; Murinae; Mus; Mus	.	.	.	.	.	.	.	COG5022^Myosin heavy chain	GO:0030424^cellular_component^axon`GO:0005938^cellular_component^cell cortex`GO:0032154^cellular_component^cleavage furrow`GO:0005829^cellular_component^cytosol`GO:0043197^cellular_component^dendritic spine`GO:0030426^cellular_component^growth cone`GO:0030496^cellular_component^midbody`GO:0016460^cellular_component^myosin II complex`GO:0043025^cellular_component^neuronal cell body`GO:0001725^cell…	.
comp10271_c0_seq1	0.34565	-0.806307	0.906765	1	2	4.70044	3.16993	2.80735	comp10271_c0	sp|Q9UDV7|ZN282_HUMAN^Q9UDV7^Q:72-191,H:198-237^55%ID^E:-6.16^RecName: Full=Zinc finger protein 282;^Eukaryota; Metazoa; Chordata; Craniata; Vertebrata; Euteleostomi; Mammalia; Eutheria; Euarchontoglires; Primates; Haplorrhini; Catarrhini; Hominidae; Homo	.	m.4231	42-425[+]	sp|Q9UDV7|ZN282_HUMAN^Q9UDV7^Q:11-50,H:198-237^55%ID^E:-6.16^RecName: Full=Zinc finger protein 282;^Eukaryota; Metazoa; Chordata; Craniata; Vertebrata; Euteleostomi; Mammalia; Eutheria; Euarchontoglires; Primates; Haplorrhini; Catarrhini; Hominidae; Homo	PF01352.22^KRAB^KRAB box^18-51^E:3.1e-13	.	.	COG5048^FOG: Zn-finger	GO:0005634^cellular_component^nucleus`GO:0003677^molecular_function^DNA binding`GO:0046872^molecular_function^metal ion binding`GO:0008270^molecular_function^zinc ion binding`GO:0045892^biological_process^negative regulation of transcription, DNA-dependent`GO:0006351^biological_process^transcription, DNA-dependent
comp10272_c0_seq1	1.31408	-0.882083	0.674308	1	1	4.75489	3.16993	2.58496	comp10272_c0	.	.	m.4232	1-342[-]	.	.	.	.	.	.
comp10274_c0_seq1	3.39105	-0.908964	0.153526	1	0	3.90689	4.32193	2.32193	comp10274_c0	.	.	.	.	.	.	.	.	.	.	.
comp10275_c0_seq1	-0.221499	-1.19436	1	1	1	4.58496	1.58496	2.32193	comp10275_c0	.	.	.	.	.	.	.	.	.	.	.
comp10276_c0_seq1	-3.18428	0.612634	0.154129	1	5.39232	5.70044	3	4.32193	comp10276_c0	.	.	.	.	.	.	.	.	.	.	.
comp10277_c0_seq1	0.34565	-0.991068	0.90681	1	2	4.39232	3.16993	2.32193	comp10277_c0	sp|P97325|SIAT6_MOUSE^P97325^Q:1-396,H:233-364^90.9091%ID^E:-67.86^RecName: Full=CMP-N-acetylneuraminate-beta-1,4-galactoside alpha-2,3-sialyltransferase;^Eukaryota; Metazoa; Chordata; Craniata; Vertebrata; Euteleostomi; Mammalia; Eutheria; Euarchontoglires; Glires; Rodentia; Sciurognathi; Muroidea; Muridae; Murinae; Mus; Mus	.	m.4234	1-399[+]	sp|P97325|SIAT6_MOUSE^P97325^Q:1-132,H:233-364^90.9091%ID^E:-67.86^RecName: Full=CMP-N-acetylneuraminate-beta-1,4-galactoside alpha-2,3-sialyltransferase;^Eukaryota; Metazoa; Chordata; Craniata; Vertebrata; Euteleostomi; Mammalia; Eutheria; Euarchontoglires; Glires; Rodentia; Sciurognathi; Muroidea; Muridae; Murinae; Mus; Mus	PF00777.13^Glyco_transf_29^Glycosyltransferase family 29 (sialyltransferase)^1-131^E:4.6e-29	.	.	NOG257001^Blue (type 1) copper domain protein	GO:0032580^cellular_component^Golgi cisterna membrane`GO:0030173^cellular_component^integral to Golgi membrane`GO:0003836^molecular_function^beta-galactoside (CMP) alpha-2,3-sialyltransferase activity`GO:0008118^molecular_function^N-acetyllactosaminide alpha-2,3-sialyltransferase activity`GO:0006486^biological_process^protein glycosylation
comp10278_c0_seq1	2.25293	-1.97991	0.373514	1	0	2.32193	3.16993	-Inf	comp10278_c0	.	.	.	.	.	.	.	.	.	.	.
comp1028_c0_seq1	-5.0692	-1.14241	0.0666434	0.897544	4.45943	2.58496	0	-Inf	comp1028_c0	sp|Q3KNY0|IGFN1_MOUSE^Q3KNY0^Q:6-377,H:367-490^42.7419%ID^E:-23.68^RecName: Full=Immunoglobulin-like and fibronectin type III domain-containing protein 1;^Eukaryota; Metazoa; Chordata; Craniata; Vertebrata; Euteleostomi; Mammalia; Eutheria; Euarchontoglires; Glires; Rodentia; Sciurognathi; Muroidea; Muridae; Murinae; Mus; Mus	.	m.69	3-380[+]	sp|Q86VF2|IGFN1_HUMAN^Q86VF2^Q:3-125,H:588-710^40.6504%ID^E:-23.68^RecName: Full=Immunoglobulin-like and fibronectin type III domain-containing protein 1;^Eukaryota; Metazoa; Chordata; Craniata; Vertebrata; Euteleostomi; Mammalia; Eutheria; Euarchontoglires; Primates; Haplorrhini; Catarrhini; Hominidae; Homo	PF00041.16^fn3^Fibronectin type III domain^61-107^E:4.6e-06	.	.	NOG12793^Calcium ion binding protein	GO:0005634^cellular_component^nucleus`GO:0030018^cellular_component^Z disc
comp10280_c0_seq1	0.168352	-2.35287	1	1	0	2.58496	1	0	comp10280_c0	.	.	.	.	.	.	.	.	.	.	.
comp10281_c0_seq1	-0.00976039	-1.54296	1	1	2	3.16993	2.80735	1.58496	comp10281_c0	sp|Q9CQM1|CA210_MOUSE^Q9CQM1^Q:86-196,H:73-109^51.3514%ID^E:-1.99^RecName: Full=Uncharacterized protein C1orf210 homolog;^Eukaryota; Metazoa; Chordata; Craniata; Vertebrata; Euteleostomi; Mammalia; Eutheria; Euarchontoglires; Glires; Rodentia; Sciurognathi; Muroidea; Muridae; Murinae; Mus; Mus	.	.	.	.	.	.	.	.	GO:0016021^cellular_component^integral to membrane	.
comp10282_c0_seq1	0.630582	-0.822934	0.826844	1	2	4.24793	3.45943	3.32193	comp10282_c0	.	.	.	.	.	.	.	.	.	.	.
comp10283_c0_seq1	0.717353	-1.14055	1	1	0	4.70044	1.58496	2.58496	comp10283_c0	.	.	.	.	.	.	.	.	.	.	.
comp10284_c0_seq1	5.67693	-1.8337	0.220765	1	-Inf	3.16993	3	0	comp10284_c0	.	.	.	.	.	.	.	.	.	.	.
comp10286_c0_seq1	0.97408	-0.828042	0.645252	1	2	3.32193	3.80735	3.80735	comp10286_c0	.	.	.	.	.	.	.	.	.	.	.
comp10287_c0_seq1	-0.258942	6.58208	0.865475	1	10.2562	11.9484	10.8146	10.8757	comp10287_c0	sp|P53041|PPP5_HUMAN^P53041^Q:2569-2592,H:342-349^62.5%ID^E:-252.09^RecName: Full=Serine/threonine-protein phosphatase 5;^Eukaryota; Metazoa; Chordata; Craniata; Vertebrata; Euteleostomi; Mammalia; Eutheria; Euarchontoglires; Primates; Haplorrhini; Catarrhini; Hominidae; Homo	.	m.4235	1-1473[+]	sp|P53041|PPP5_HUMAN^P53041^Q:4-490,H:3-499^84.9095%ID^E:-254.25^RecName: Full=Serine/threonine-protein phosphatase 5;^Eukaryota; Metazoa; Chordata; Craniata; Vertebrata; Euteleostomi; Mammalia; Eutheria; Euarchontoglires; Primates; Haplorrhini; Catarrhini; Hominidae; Homo	PF13414.1^TPR_11^TPR repeat^17-84^E:2.8e-16`PF00515.23^TPR_1^Tetratricopeptide repeat^19-52^E:1.2e-05`PF07719.12^TPR_2^Tetratricopeptide repeat^19-52^E:0.00057`PF13181.1^TPR_8^Tetratricopeptide repeat^29-50^E:0.007`PF13371.1^TPR_9^Tetratricopeptide repeat^29-83^E:0.49`PF13414.1^TPR_11^TPR repeat^71-118^E:2.2e-07`PF00515.23^TPR_1^Tetratricopeptide repeat^88-120^E:2.1e-05`PF07719.12^TPR_2^Tetratric…	.	.	COG0639^Diadenosine tetraphosphatase and related serine/threonine protein phosphatases	GO:0005829^cellular_component^cytosol`GO:0005794^cellular_component^Golgi apparatus`GO:0043005^cellular_component^neuron projection`GO:0043025^cellular_component^neuronal cell body`GO:0005634^cellular_component^nucleus`GO:0046872^molecular_function^metal ion binding`GO:0004722^molecular_function^protein serine/threonine phosphatase activity`GO:0004871^molecular_function^signal transducer activity…
comp10287_c0_seq1	-0.258942	6.58208	0.865475	1	10.2562	11.9484	10.8146	10.8757	comp10287_c0	sp|P53041|PPP5_HUMAN^P53041^Q:2569-2592,H:342-349^62.5%ID^E:-252.09^RecName: Full=Serine/threonine-protein phosphatase 5;^Eukaryota; Metazoa; Chordata; Craniata; Vertebrata; Euteleostomi; Mammalia; Eutheria; Euarchontoglires; Primates; Haplorrhini; Catarrhini; Hominidae; Homo	.	m.4236	4048-4353[-]	.	.	.	.	.	.
comp10288_c0_seq1	-2.34201	-1.66225	0.315592	1	3.16993	1	1.58496	2.32193	comp10288_c0	.	.	.	.	.	.	.	.	.	.	.
comp10289_c0_seq1	0.0301205	-0.953601	1	1	2.32193	3.45943	3.16993	3.70044	comp10289_c0	sp|P52736|ZN133_HUMAN^P52736^Q:332-204,H:279-321^53.4884%ID^E:-9.3^RecName: Full=Zinc finger protein 133;^Eukaryota; Metazoa; Chordata; Craniata; Vertebrata; Euteleostomi; Mammalia; Eutheria; Euarchontoglires; Primates; Haplorrhini; Catarrhini; Hominidae; Homo	.	.	.	.	.	.	.	COG5048^FOG: Zn-finger	GO:0005634^cellular_component^nucleus`GO:0003677^molecular_function^DNA binding`GO:0046872^molecular_function^metal ion binding`GO:0003700^molecular_function^sequence-specific DNA binding transcription factor activity`GO:0008270^molecular_function^zinc ion binding`GO:0006351^biological_process^transcription, DNA-dependent	.
comp10290_c0_seq1	-0.127414	8.45765	0.9444	1	12.0042	13.795	12.6941	12.9135	comp10290_c0	sp|Q99LE6|ABCF2_MOUSE^Q99LE6^Q:2384-1050,H:15-468^86.7841%ID^E:-299.786^RecName: Full=ATP-binding cassette sub-family F member 2;^Eukaryota; Metazoa; Chordata; Craniata; Vertebrata; Euteleostomi; Mammalia; Eutheria; Euarchontoglires; Glires; Rodentia; Sciurognathi; Muroidea; Muridae; Murinae; Mus; Mus	.	m.4237	579-2426[-]	sp|Q99LE6|ABCF2_MOUSE^Q99LE6^Q:1-614,H:1-624^88.4615%ID^E:-10000^RecName: Full=ATP-binding cassette sub-family F member 2;^Eukaryota; Metazoa; Chordata; Craniata; Vertebrata; Euteleostomi; Mammalia; Eutheria; Euarchontoglires; Glires; Rodentia; Sciurognathi; Muroidea; Muridae; Murinae; Mus; Mus	PF00005.22^ABC_tran^ABC transporter^173-253^E:1.7e-13`PF12848.2^ABC_tran_2^ABC transporter^292-370^E:2.3e-20`PF00005.22^ABC_tran^ABC transporter^433-541^E:4.6e-20`PF13304.1^AAA_21^AAA domain^493-559^E:1.6e-06	.	.	COG0488^ATPase components of ABC transporters with duplicated ATPase domains	GO:0005739^cellular_component^mitochondrion`GO:0005524^molecular_function^ATP binding`GO:0016887^molecular_function^ATPase activity`GO:0006200^biological_process^ATP catabolic process
comp10292_c0_seq1	0.175216	-1.66248	1	1	1	3.32193	2	2.32193	comp10292_c0	.	.	.	.	.	.	.	.	.	.	.
comp10293_c0_seq1	-8.32827	-1.05341	0.0196543	0.531469	4.85798	-Inf	-Inf	-Inf	comp10293_c0	sp|P08855|ICAL_RABIT^P08855^Q:49-138,H:472-501^53.3333%ID^E:-2.46^RecName: Full=Calpastatin;^Eukaryota; Metazoa; Chordata; Craniata; Vertebrata; Euteleostomi; Mammalia; Eutheria; Euarchontoglires; Glires; Lagomorpha; Leporidae; Oryctolagus	.	m.4239	1-315[+]	sp|P51125|ICAL_MOUSE^P51125^Q:17-99,H:546-634^37.3626%ID^E:-5.48^RecName: Full=Calpastatin;^Eukaryota; Metazoa; Chordata; Craniata; Vertebrata; Euteleostomi; Mammalia; Eutheria; Euarchontoglires; Glires; Rodentia; Sciurognathi; Muroidea; Muridae; Murinae; Mus; Mus	PF00748.14^Calpain_inhib^Calpain inhibitor^3-47^E:7.4e-09	.	.	NOG25116^Calpastatin protein	GO:0004869^molecular_function^cysteine-type endopeptidase inhibitor activity
comp10294_c0_seq1	0.958666	-1.37834	0.867833	1	1	3.32193	2.80735	3	comp10294_c0	sp|A6QR20|ANR32_BOVIN^A6QR20^Q:117-19,H:696-728^57.5758%ID^E:-15.7066^RecName: Full=Ankyrin repeat domain-containing protein 32;^Eukaryota; Metazoa; Chordata; Craniata; Vertebrata; Euteleostomi; Mammalia; Eutheria; Laurasiatheria; Cetartiodactyla; Ruminantia; Pecora; Bovidae; Bovinae; Bos	.	m.4241	1-300[-]	sp|A6QR20|ANR32_BOVIN^A6QR20^Q:1-94,H:635-728^52.1277%ID^E:-22.75^RecName: Full=Ankyrin repeat domain-containing protein 32;^Eukaryota; Metazoa; Chordata; Craniata; Vertebrata; Euteleostomi; Mammalia; Eutheria; Laurasiatheria; Cetartiodactyla; Ruminantia; Pecora; Bovidae; Bovinae; Bos	.	.	.	.	.
comp10296_c0_seq1	-1.63447	-0.829702	0.509623	1	3.16993	4.32193	2.32193	3.16993	comp10296_c0	.	.	.	.	.	.	.	.	.	.	.
comp10297_c0_seq1	5.67693	-1.39773	0.216507	1	-Inf	4.08746	3	1.58496	comp10297_c0	.	.	.	.	.	.	.	.	.	.	.
comp10298_c0_seq1	1.49619	0.577939	0.470367	1	3.32193	5.42626	5.64386	4.64386	comp10298_c0	.	.	.	.	.	.	.	.	.	.	.
comp10299_c0_seq1	0.178862	-1.19901	1	1	2	3.90689	3	2.32193	comp10299_c0	.	.	.	.	.	.	.	.	.	.	.
comp1030_c0_seq1	0.717353	-2.01073	1	1	0	3.16993	1.58496	1	comp1030_c0	.	.	.	.	.	.	.	.	.	.	.
comp10300_c0_seq1	2.25293	-1.0636	0.364052	1	0	3.80735	3.16993	3.58496	comp10300_c0	sp|Q0V7M1|KPSH1_BOVIN^Q0V7M1^Q:323-3,H:114-220^91.5888%ID^E:-50.46^RecName: Full=Serine/threonine-protein kinase H1;^Eukaryota; Metazoa; Chordata; Craniata; Vertebrata; Euteleostomi; Mammalia; Eutheria; Laurasiatheria; Cetartiodactyla; Ruminantia; Pecora; Bovidae; Bovinae; Bos	.	m.4243	3-323[-]	sp|Q0V7M1|KPSH1_BOVIN^Q0V7M1^Q:1-107,H:114-220^91.5888%ID^E:-50.46^RecName: Full=Serine/threonine-protein kinase H1;^Eukaryota; Metazoa; Chordata; Craniata; Vertebrata; Euteleostomi; Mammalia; Eutheria; Laurasiatheria; Cetartiodactyla; Ruminantia; Pecora; Bovidae; Bovinae; Bos	PF00069.20^Pkinase^Protein kinase domain^3-107^E:3.8e-28`PF07714.12^Pkinase_Tyr^Protein tyrosine kinase^4-106^E:1.1e-16	.	.	COG0515^Serine/threonine protein kinase	GO:0005789^cellular_component^endoplasmic reticulum membrane`GO:0005794^cellular_component^Golgi apparatus`GO:0005815^cellular_component^microtubule organizing center`GO:0016607^cellular_component^nuclear speck`GO:0005886^cellular_component^plasma membrane`GO:0005524^molecular_function^ATP binding`GO:0004674^molecular_function^protein serine/threonine kinase activity
comp10302_c0_seq1	-0.801089	-1.19741	0.722928	1	2.58496	3.45943	2.58496	3	comp10302_c0	.	.	.	.	.	.	.	.	.	.	.
comp10303_c0_seq1	1.14729	-1.70946	0.763979	1	1	3.16993	3	0	comp10303_c0	sp|Q9D666|SUN1_MOUSE^Q9D666^Q:1-63,H:890-910^80.9524%ID^E:-3.96^RecName: Full=SUN domain-containing protein 1;^Eukaryota; Metazoa; Chordata; Craniata; Vertebrata; Euteleostomi; Mammalia; Eutheria; Euarchontoglires; Glires; Rodentia; Sciurognathi; Muroidea; Muridae; Murinae; Mus; Mus	.	.	.	.	.	.	.	.	GO:0002080^cellular_component^acrosomal membrane`GO:0005639^cellular_component^integral to nuclear inner membrane`GO:0005521^molecular_function^lamin binding`GO:0008270^molecular_function^zinc ion binding	.
comp10304_c0_seq1	0.350244	-0.120827	0.901383	1	3.58496	3.32193	4.75489	4.39232	comp10304_c0	.	.	.	.	.	.	.	.	.	.	.
comp10307_c0_seq1	1.11407	-2.10552	0.77271	1	0	2	2	2	comp10307_c0	.	.	.	.	.	.	.	.	.	.	.
comp10308_c0_seq1	0.1621	1.62054	0.955286	1	5.16993	7.21917	6.14975	4.90689	comp10308_c0	sp|Q6GQW0|BTBDB_MOUSE^Q6GQW0^Q:3-1337,H:559-1005^89.7092%ID^E:-230.07^RecName: Full=Ankyrin repeat and BTB/POZ domain-containing protein BTBD11;^Eukaryota; Metazoa; Chordata; Craniata; Vertebrata; Euteleostomi; Mammalia; Eutheria; Euarchontoglires; Glires; Rodentia; Sciurognathi; Muroidea; Muridae; Murinae; Mus; Mus	.	m.4244	3-1340[+]	sp|Q6GQW0|BTBDB_MOUSE^Q6GQW0^Q:1-445,H:559-1005^89.7092%ID^E:-230.07^RecName: Full=Ankyrin repeat and BTB/POZ domain-containing protein BTBD11;^Eukaryota; Metazoa; Chordata; Craniata; Vertebrata; Euteleostomi; Mammalia; Eutheria; Euarchontoglires; Glires; Rodentia; Sciurognathi; Muroidea; Muridae; Murinae; Mus; Mus	PF12796.2^Ank_2^Ankyrin repeats (3 copies)^27-124^E:1.7e-13`PF13637.1^Ank_4^Ankyrin repeats (many copies)^27-71^E:5.9e-05`PF00023.25^Ank^Ankyrin repeat^51-79^E:1.5e-09`PF13606.1^Ank_3^Ankyrin repeat^51-79^E:3.1e-06`PF13637.1^Ank_4^Ankyrin repeats (many copies)^97-155^E:4.1e-07`PF00023.25^Ank^Ankyrin repeat^98-123^E:2.9e-05`PF12796.2^Ank_2^Ankyrin repeats (3 copies)^127-200^E:3e-07`PF00023.25^Ank^…	.	.	COG0666^FOG: Ankyrin repeat	GO:0016021^cellular_component^integral to membrane
comp10311_c0_seq1	-2.35673	-1.19735	0.306847	1	3.58496	2.32193	2	3	comp10311_c0	.	.	.	.	.	.	.	.	.	.	.
comp10313_c0_seq1	-0.7705	-1.67144	0.770296	1	1	4.16993	1	-Inf	comp10313_c0	.	.	.	.	.	.	.	.	.	.	.
comp10316_c0_seq1	-0.163027	-0.841856	1	1	2.80735	3.90689	3.45943	3.16993	comp10316_c0	.	.	.	.	.	.	.	.	.	.	.
comp10317_c0_seq1	-2.53253	-1.64708	0.283907	1	2.80735	3.58496	1	-Inf	comp10317_c0	.	.	.	.	.	.	.	.	.	.	.
comp10318_c0_seq1	1.15883	-0.847114	0.656756	1	1.58496	4.45943	3.58496	2.80735	comp10318_c0	.	.	.	.	.	.	.	.	.	.	.
comp10319_c0_seq1	0.17763	-1.72547	1	1	1.58496	2.32193	2.58496	2.32193	comp10319_c0	.	.	.	.	.	.	.	.	.	.	.
comp10320_c0_seq1	0.786656	7.33309	0.627823	1	10.2009	12.695	11.8049	12.0182	comp10320_c0	sp|P19218|GP2_RAT^P19218^Q:522-94,H:35-180^38%ID^E:-15.11^RecName: Full=Pancreatic secretory granule membrane major glycoprotein GP2;^Eukaryota; Metazoa; Chordata; Craniata; Vertebrata; Euteleostomi; Mammalia; Eutheria; Euarchontoglires; Glires; Rodentia; Sciurognathi; Muroidea; Muridae; Murinae; Rattus	.	m.4246	1-933[-]	sp|P19218|GP2_RAT^P19218^Q:138-280,H:35-180^38%ID^E:-15.19^RecName: Full=Pancreatic secretory granule membrane major glycoprotein GP2;^Eukaryota; Metazoa; Chordata; Craniata; Vertebrata; Euteleostomi; Mammalia; Eutheria; Euarchontoglires; Glires; Rodentia; Sciurognathi; Muroidea; Muridae; Murinae; Rattus	.	sigP:1^19^0.853^YES	.	NOG147599^Glycoprotein 2 (zymogen granule membrane)	GO:0031225^cellular_component^anchored to membrane`GO:0016324^cellular_component^apical plasma membrane`GO:0005576^cellular_component^extracellular region`GO:0003823^molecular_function^antigen binding`GO:0002412^biological_process^antigen transcytosis by M cells in mucosal-associated lymphoid tissue
comp10321_c0_seq1	-1.02042	-1.14328	0.657424	1	2.80735	3.90689	2.58496	2.32193	comp10321_c0	sp|O14526|FCHO1_HUMAN^O14526^Q:3-182,H:361-420^46.6667%ID^E:-8.6837^RecName: Full=FCH domain only protein 1;^Eukaryota; Metazoa; Chordata; Craniata; Vertebrata; Euteleostomi; Mammalia; Eutheria; Euarchontoglires; Primates; Haplorrhini; Catarrhini; Hominidae; Homo	.	m.4247	3-329[+]	sp|Q8K285|FCHO1_MOUSE^Q8K285^Q:1-41,H:357-397^58.5366%ID^E:-9.02081^RecName: Full=FCH domain only protein 1;^Eukaryota; Metazoa; Chordata; Craniata; Vertebrata; Euteleostomi; Mammalia; Eutheria; Euarchontoglires; Glires; Rodentia; Sciurognathi; Muroidea; Muridae; Murinae; Mus; Mus	.	.	.	.	GO:0030136^cellular_component^clathrin-coated vesicle`GO:0005905^cellular_component^coated pit`GO:0005886^cellular_component^plasma membrane`GO:0048268^biological_process^clathrin coat assembly`GO:0072583^biological_process^clathrin-mediated endocytosis
comp10322_c0_seq1	-1.276	-1.34799	0.658551	1	2.80735	3.32193	2.32193	2.32193	comp10322_c0	.	.	.	.	.	.	.	.	.	.	.
comp10323_c0_seq1	2.77569	-0.820287	0.247388	1	0	3.45943	3.70044	4.16993	comp10323_c0	.	.	.	.	.	.	.	.	.	.	.
comp10324_c0_seq1	-2.04591	-1.43019	0.387834	1	3.58496	2.80735	2.32193	-Inf	comp10324_c0	.	.	.	.	.	.	.	.	.	.	.
comp10325_c0_seq1	-0.542336	-0.998207	0.799196	1	2.32193	4.16993	2.58496	3.16993	comp10325_c0	sp|F1MBP6|KLHL3_BOVIN^F1MBP6^Q:3-347,H:393-507^90.4348%ID^E:-54.41^RecName: Full=Kelch-like protein 3;^Eukaryota; Metazoa; Chordata; Craniata; Vertebrata; Euteleostomi; Mammalia; Eutheria; Laurasiatheria; Cetartiodactyla; Ruminantia; Pecora; Bovidae; Bovinae; Bos	.	m.4249	3-350[+]	sp|F1MBP6|KLHL3_BOVIN^F1MBP6^Q:1-115,H:393-507^92.1739%ID^E:-56.73^RecName: Full=Kelch-like protein 3;^Eukaryota; Metazoa; Chordata; Craniata; Vertebrata; Euteleostomi; Mammalia; Eutheria; Laurasiatheria; Cetartiodactyla; Ruminantia; Pecora; Bovidae; Bovinae; Bos	PF01344.20^Kelch_1^Kelch motif^1-36^E:1.5e-09`PF01344.20^Kelch_1^Kelch motif^38-85^E:3.4e-15`PF07646.10^Kelch_2^Kelch motif^38-84^E:3.8e-05`PF13418.1^Kelch_4^Galactose oxidase, central domain^42-84^E:3.8e-05`PF13964.1^Kelch_6^Kelch motif^45-88^E:1.1e-06`PF13415.1^Kelch_3^Galactose oxidase, central domain^49-94^E:1.3e-07	.	.	.	GO:0005856^cellular_component^cytoskeleton`GO:0005829^cellular_component^cytosol`GO:0072156^biological_process^distal tubule morphogenesis`GO:0016567^biological_process^protein ubiquitination`GO:0070294^biological_process^renal sodium ion absorption
comp10326_c0_seq1	-0.7705	-1.58333	0.769871	1	1	3.70044	1	2.58496	comp10326_c0	.	.	.	.	.	.	.	.	.	.	.
comp10327_c0_seq1	6.12865	-1.51067	0.155899	1	-Inf	3.80735	3.45943	-Inf	comp10327_c0	.	.	.	.	.	.	.	.	.	.	.
comp1033_c0_seq1	-0.00976039	-1.14024	1	1	2	3.58496	2.80735	3.32193	comp1033_c0	.	.	.	.	.	.	.	.	.	.	.
comp10330_c0_seq1	-2.63613	-1.83262	0.510993	1	2	2.32193	0	2.80735	comp10330_c0	sp|P61259|SOX14_MACFA^P61259^Q:3-41,H:60-72^100%ID^E:-6.7555^RecName: Full=Transcription factor SOX-14;^Eukaryota; Metazoa; Chordata; Craniata; Vertebrata; Euteleostomi; Mammalia; Eutheria; Euarchontoglires; Primates; Haplorrhini; Catarrhini; Cercopithecidae; Cercopithecinae; Macaca	.	.	.	.	.	.	.	.	GO:0005634^cellular_component^nucleus`GO:0043565^molecular_function^sequence-specific DNA binding`GO:0000122^biological_process^negative regulation of transcription from RNA polymerase II promoter`GO:0006351^biological_process^transcription, DNA-dependent	.
comp10331_c0_seq1	5.99321	-1.89772	0.15974	1	-Inf	1	3.32193	2	comp10331_c0	.	.	.	.	.	.	.	.	.	.	.
comp10332_c0_seq1	1.33303	-0.910419	0.521402	1	2	3	4.16993	3.16993	comp10332_c0	.	.	.	.	.	.	.	.	.	.	.
comp10334_c0_seq1	0.394675	-1.86076	1	1	1.58496	-Inf	2.80735	2.58496	comp10334_c0	.	.	.	.	.	.	.	.	.	.	.
comp10335_c0_seq1	1.83279	5.18284	0.24298	1	7.04439	9.87191	9.69523	10.5068	comp10335_c0	.	.	m.4250	1094-1570[-]	.	.	.	ExpAA=34.38^PredHel=2^Topology=i5-27o32-54i	.	.
comp10335_c0_seq1	1.83279	5.18284	0.24298	1	7.04439	9.87191	9.69523	10.5068	comp10335_c0	.	.	m.4251	1164-1571[-]	sp|Q8VDM6|HNRL1_MOUSE^Q8VDM6^Q:115-134,H:831-851^71.4286%ID^E:-5.88566^RecName: Full=Heterogeneous nuclear ribonucleoprotein U-like protein 1;^Eukaryota; Metazoa; Chordata; Craniata; Vertebrata; Euteleostomi; Mammalia; Eutheria; Euarchontoglires; Glires; Rodentia; Sciurognathi; Muroidea; Muridae; Murinae; Mus; Mus	.	.	.	.	GO:0005634^cellular_component^nucleus`GO:0030529^cellular_component^ribonucleoprotein complex`GO:0003723^molecular_function^RNA binding`GO:0006355^biological_process^regulation of transcription, DNA-dependent`GO:0009615^biological_process^response to virus`GO:0006396^biological_process^RNA processing`GO:0006351^biological_process^transcription, DNA-dependent
comp10335_c0_seq2	0.652597	6.97776	0.677979	1	9.91588	12.2315	11.3859	11.7727	comp10335_c0	.	.	m.4252	1094-1834[-]	.	.	.	ExpAA=52.11^PredHel=2^Topology=i5-27o105-127i	.	.
comp10335_c0_seq2	0.652597	6.97776	0.677979	1	9.91588	12.2315	11.3859	11.7727	comp10335_c0	.	.	m.4253	1164-1835[-]	sp|Q9BUJ2|HNRL1_HUMAN^Q9BUJ2^Q:125-189,H:766-834^57.7465%ID^E:-17.8843^RecName: Full=Heterogeneous nuclear ribonucleoprotein U-like protein 1;^Eukaryota; Metazoa; Chordata; Craniata; Vertebrata; Euteleostomi; Mammalia; Eutheria; Euarchontoglires; Primates; Haplorrhini; Catarrhini; Hominidae; Homo	.	.	.	.	GO:0005654^cellular_component^nucleoplasm`GO:0030529^cellular_component^ribonucleoprotein complex`GO:0003723^molecular_function^RNA binding`GO:0000398^biological_process^mRNA splicing, via spliceosome`GO:0006355^biological_process^regulation of transcription, DNA-dependent`GO:0009615^biological_process^response to virus`GO:0006351^biological_process^transcription, DNA-dependent
comp10336_c0_seq1	0.175216	-1.54608	1	1	1	3	2	3.16993	comp10336_c0	.	.	.	.	.	.	.	.	.	.	.
comp10337_c0_seq1	0.180111	-1.2922	1	1	2.58496	2.80735	3.58496	1.58496	comp10337_c0	.	.	.	.	.	.	.	.	.	.	.
comp10338_c0_seq1	0.175216	-1.49808	1	1	1	3	2	3.32193	comp10338_c0	.	.	.	.	.	.	.	.	.	.	.
comp10339_c0_seq1	0.0447967	-0.413058	1	1	3.45943	3.70044	4.32193	3.70044	comp10339_c0	sp|Q9UL68|MYT1L_HUMAN^Q9UL68^Q:562-521,H:1093-1106^42.8571%ID^E:-1.89268^RecName: Full=Myelin transcription factor 1-like protein;^Eukaryota; Metazoa; Chordata; Craniata; Vertebrata; Euteleostomi; Mammalia; Eutheria; Euarchontoglires; Primates; Haplorrhini; Catarrhini; Hominidae; Homo	.	.	.	.	.	.	.	.	GO:0005634^cellular_component^nucleus`GO:0003677^molecular_function^DNA binding`GO:0046872^molecular_function^metal ion binding`GO:0003700^molecular_function^sequence-specific DNA binding transcription factor activity`GO:0008270^molecular_function^zinc ion binding`GO:0030154^biological_process^cell differentiation`GO:0007399^biological_process^nervous system development`GO:0006351^biological_proc…	.
comp1034_c0_seq1	0.394675	-1.5986	1	1	1.58496	3.16993	2.80735	1.58496	comp1034_c0	.	.	.	.	.	.	.	.	.	.	.
comp10341_c0_seq1	2.08614	-1.49057	0.427866	1	0	2.58496	3	3.16993	comp10341_c0	.	.	.	.	.	.	.	.	.	.	.
comp10343_c0_seq1	0.74162	-1.66106	0.868705	1	1	1.58496	2.58496	3.16993	comp10343_c0	.	.	.	.	.	.	.	.	.	.	.
comp10344_c0_seq1	-0.809129	-0.0902642	0.722666	1	3.58496	4.58496	3.58496	4.75489	comp10344_c0	.	.	.	.	.	.	.	.	.	.	.
comp10345_c0_seq1	1.68047	-0.496511	0.505501	1	0	5.20945	2.58496	4.08746	comp10345_c0	sp|Q91892|CLCC1_XENLA^Q91892^Q:306-590,H:272-366^31.5789%ID^E:-7.7^RecName: Full=Chloride channel CLIC-like protein 1;^Eukaryota; Metazoa; Chordata; Craniata; Vertebrata; Euteleostomi; Amphibia; Batrachia; Anura; Pipoidea; Pipidae; Xenopodinae; Xenopus; Xenopus	.	m.4256	2-322[-]	.	.	.	.	.	.
comp10346_c0_seq1	-1.55502	7.49825	0.352675	1	12.4686	10.676	11.7309	10.3026	comp10346_c0	sp|Q28808|IFI6_PANTR^Q28808^Q:707-546,H:65-121^59.6491%ID^E:-6.42^RecName: Full=Interferon alpha-inducible protein 6;^Eukaryota; Metazoa; Chordata; Craniata; Vertebrata; Euteleostomi; Mammalia; Eutheria; Euarchontoglires; Primates; Haplorrhini; Catarrhini; Hominidae; Pan	.	.	.	.	.	.	.	NOG245779^Sarcoglycan, epsilon protein	GO:0016021^cellular_component^integral to membrane`GO:0005739^cellular_component^mitochondrion`GO:0043066^biological_process^negative regulation of apoptotic process`GO:0043154^biological_process^negative regulation of cysteine-type endopeptidase activity involved in apoptotic process`GO:0051902^biological_process^negative regulation of mitochondrial depolarization`GO:0001836^biological_process^r…	.
comp10347_c0_seq1	-1.31241	-0.898574	0.557942	1	3.32193	3.58496	2.80735	3.32193	comp10347_c0	.	.	m.4259	1-384[-]	.	.	.	.	.	.
comp10348_c0_seq1	-0.6383	-0.74435	0.807396	1	3	4.58496	3.16993	2.58496	comp10348_c0	.	.	.	.	.	.	.	.	.	.	.
comp10350_c0_seq1	0.486037	-1.36357	1	1	1	3.80735	2.32193	2.80735	comp10350_c0	.	.	.	.	.	.	.	.	.	.	.
comp10351_c0_seq1	-3.55617	-1.31801	0.115083	1	4.39232	-Inf	1.58496	-Inf	comp10351_c0	.	.	.	.	.	.	.	.	.	.	.
comp10353_c0_seq1	-0.956997	-1.24043	0.711323	1	3.32193	3.16993	3.16993	0	comp10353_c0	.	.	.	.	.	.	.	.	.	.	.
comp10355_c0_seq1	-0.388775	-1.10132	1	1	1.58496	3.45943	2	4	comp10355_c0	sp|P61591|MCPH1_GORGO^P61591^Q:171-64,H:5-40^72.2222%ID^E:-7.22^RecName: Full=Microcephalin;^Eukaryota; Metazoa; Chordata; Craniata; Vertebrata; Euteleostomi; Mammalia; Eutheria; Euarchontoglires; Primates; Haplorrhini; Catarrhini; Hominidae; Gorilla	.	.	.	.	.	.	.	.	GO:0005815^cellular_component^microtubule organizing center	.
comp10355_c0_seq2	3.44648	0.543411	0.166832	1	1	5.58496	5.32193	5.2854	comp10355_c0	sp|Q5IFK1|MCPH1_MACFA^Q5IFK1^Q:681-82,H:5-205^66.6667%ID^E:-70.5^RecName: Full=Microcephalin;^Eukaryota; Metazoa; Chordata; Craniata; Vertebrata; Euteleostomi; Mammalia; Eutheria; Euarchontoglires; Primates; Haplorrhini; Catarrhini; Cercopithecidae; Cercopithecinae; Macaca	.	m.4261	1-711[-]	sp|Q5IFK1|MCPH1_MACFA^Q5IFK1^Q:11-210,H:5-205^66.6667%ID^E:-70.58^RecName: Full=Microcephalin;^Eukaryota; Metazoa; Chordata; Craniata; Vertebrata; Euteleostomi; Mammalia; Eutheria; Euarchontoglires; Primates; Haplorrhini; Catarrhini; Cercopithecidae; Cercopithecinae; Macaca	PF00533.21^BRCT^BRCA1 C Terminus (BRCT) domain^9-86^E:3.3e-07`PF12738.2^PTCB-BRCT^twin BRCT domain^17-81^E:1.8e-11	.	.	.	GO:0005815^cellular_component^microtubule organizing center
comp10357_c0_seq1	5.84372	-1.53721	0.182585	1	-Inf	2.32193	3.16993	3.16993	comp10357_c0	.	.	.	.	.	.	.	.	.	.	.
comp10359_c0_seq1	0.74162	-1.15216	0.867345	1	1	4.52356	2.58496	2	comp10359_c0	.	.	.	.	.	.	.	.	.	.	.
comp1036_c0_seq1	2.08614	-1.49057	0.427866	1	0	2.58496	3	3.16993	comp1036_c0	.	.	.	.	.	.	.	.	.	.	.
comp10360_c0_seq1	0.758752	-0.722017	0.734764	1	2.58496	2	4.16993	4	comp10360_c0	.	.	.	.	.	.	.	.	.	.	.
comp10362_c0_seq1	1.9562	1.07131	0.369138	1	3.16993	5.72792	5.9542	5.88264	comp10362_c0	.	.	.	.	.	.	.	.	.	.	.
comp10365_c0_seq1	0.291659	2.77659	0.882321	1	5.24793	8.76487	6.35755	7.2854	comp10365_c0	sp|Q9CYZ6|CS060_MOUSE^Q9CYZ6^Q:449-649,H:103-165^38.2353%ID^E:-17.4^RecName: Full=Uncharacterized protein C19orf60 homolog;^Eukaryota; Metazoa; Chordata; Craniata; Vertebrata; Euteleostomi; Mammalia; Eutheria; Euarchontoglires; Glires; Rodentia; Sciurognathi; Muroidea; Muridae; Murinae; Mus; Mus	.	m.4263	2-664[+]	sp|Q9CYZ6|CS060_MOUSE^Q9CYZ6^Q:150-220,H:103-169^38.8889%ID^E:-18.6378^RecName: Full=Uncharacterized protein C19orf60 homolog;^Eukaryota; Metazoa; Chordata; Craniata; Vertebrata; Euteleostomi; Mammalia; Eutheria; Euarchontoglires; Glires; Rodentia; Sciurognathi; Muroidea; Muridae; Murinae; Mus; Mus	.	.	ExpAA=20.24^PredHel=1^Topology=i21-43o	.	.
comp10365_c0_seq2	0	0.0247736	1	1	-Inf	6.35755	-Inf	4.16993	comp10365_c0	sp|Q9CYZ6|CS060_MOUSE^Q9CYZ6^Q:366-566,H:103-165^38.2353%ID^E:-3.42^RecName: Full=Uncharacterized protein C19orf60 homolog;^Eukaryota; Metazoa; Chordata; Craniata; Vertebrata; Euteleostomi; Mammalia; Eutheria; Euarchontoglires; Glires; Rodentia; Sciurognathi; Muroidea; Muridae; Murinae; Mus; Mus	.	.	.	.	.	.	.	.	.	.
comp10367_c0_seq1	-0.274281	-0.267355	0.91288	1	3.45943	4.52356	4	4	comp10367_c0	sp|O43559|FRS3_HUMAN^O43559^Q:316-627,H:1-106^87.7358%ID^E:-48.18^RecName: Full=Fibroblast growth factor receptor substrate 3;^Eukaryota; Metazoa; Chordata; Craniata; Vertebrata; Euteleostomi; Mammalia; Eutheria; Euarchontoglires; Primates; Haplorrhini; Catarrhini; Hominidae; Homo	.	m.4264	316-630[+]	sp|O43559|FRS3_HUMAN^O43559^Q:1-104,H:1-106^87.7358%ID^E:-48.61^RecName: Full=Fibroblast growth factor receptor substrate 3;^Eukaryota; Metazoa; Chordata; Craniata; Vertebrata; Euteleostomi; Mammalia; Eutheria; Euarchontoglires; Primates; Haplorrhini; Catarrhini; Hominidae; Homo	PF02174.12^IRS^PTB domain (IRS-1 type)^18-104^E:1.7e-29	.	.	.	GO:0005886^cellular_component^plasma membrane`GO:0008543^biological_process^fibroblast growth factor receptor signaling pathway
comp10368_c0_seq1	-0.733268	5.97745	0.62532	1	9.8933	11.043	9.97728	10.4969	comp10368_c0	sp|P07552|QCR10_BOVIN^P07552^Q:416-360,H:1-19^68.4211%ID^E:-13.4957^RecName: Full=Cytochrome b-c1 complex subunit 10;^Eukaryota; Metazoa; Chordata; Craniata; Vertebrata; Euteleostomi; Mammalia; Eutheria; Laurasiatheria; Cetartiodactyla; Ruminantia; Pecora; Bovidae; Bovinae; Bos	.	.	.	.	.	.	.	NOG70565^Ubiquinol-Cytochrome c reductase	GO:0016021^cellular_component^integral to membrane`GO:0005743^cellular_component^mitochondrial inner membrane`GO:0070469^cellular_component^respiratory chain`GO:0009055^molecular_function^electron carrier activity`GO:0008121^molecular_function^ubiquinol-cytochrome-c reductase activity`GO:0022900^biological_process^electron transport chain	.
comp10369_c0_seq1	-1.26011	-0.873721	0.562226	1	3.45943	3.16993	3	3.45943	comp10369_c0	.	.	.	.	.	.	.	.	.	.	.
comp1037_c0_seq1	-2.53253	-2.05764	0.289704	1	2.80735	1.58496	1	0	comp1037_c0	.	.	.	.	.	.	.	.	.	.	.
comp10370_c0_seq1	5.48831	-2.06886	0.271946	1	-Inf	2.80735	2.80735	-Inf	comp10370_c0	.	.	.	.	.	.	.	.	.	.	.
comp10371_c0_seq1	-5.0692	-1.16809	0.0667398	0.898511	4.45943	2	0	0	comp10371_c0	.	.	.	.	.	.	.	.	.	.	.
comp10373_c0_seq1	1.94251	-0.688151	0.450263	1	1	5	3.80735	2	comp10373_c0	.	.	.	.	.	.	.	.	.	.	.
comp10374_c0_seq1	0.34565	-1.31165	0.90721	1	2	3.80735	3.16993	1	comp10374_c0	.	.	.	.	.	.	.	.	.	.	.
comp10375_c0_seq1	1.89752	-1.04155	0.504681	1	0	4	2.80735	3.70044	comp10375_c0	.	.	.	.	.	.	.	.	.	.	.
comp10377_c0_seq1	1.11407	-1.31994	0.768806	1	0	3.70044	2	3.45943	comp10377_c0	.	.	.	.	.	.	.	.	.	.	.
comp10378_c0_seq1	-2.20266	0.0176335	0.297721	1	4	5.55459	2.58496	4.08746	comp10378_c0	.	.	.	.	.	.	.	.	.	.	.
comp10381_c0_seq1	1.89752	-1.06773	0.504771	1	0	4.32193	2.80735	3.16993	comp10381_c0	.	.	.	.	.	.	.	.	.	.	.
comp10382_c0_seq1	-1.85092	8.65072	0.335029	1	13.1613	13.9679	12.1277	12.0861	comp10382_c0	sp|Q06055|AT5G2_HUMAN^Q06055^Q:97-516,H:1-141^73.9726%ID^E:-45.89^RecName: Full=ATP synthase lipid-binding protein, mitochondrial;^Eukaryota; Metazoa; Chordata; Craniata; Vertebrata; Euteleostomi; Mammalia; Eutheria; Euarchontoglires; Primates; Haplorrhini; Catarrhini; Hominidae; Homo	.	m.4265	1-519[+]	sp|Q06055|AT5G2_HUMAN^Q06055^Q:33-172,H:1-141^82.2695%ID^E:-54.39^RecName: Full=ATP synthase lipid-binding protein, mitochondrial;^Eukaryota; Metazoa; Chordata; Craniata; Vertebrata; Euteleostomi; Mammalia; Eutheria; Euarchontoglires; Primates; Haplorrhini; Catarrhini; Hominidae; Homo	PF00137.16^ATP-synt_C^ATP synthase subunit C^104-171^E:4.8e-17	sigP:1^21^0.709^YES	ExpAA=63.36^PredHel=3^Topology=o10-32i111-133o148-170i	COG0636^F0F1-type ATP synthase, subunit c/Archaeal/vacuolar-type H+-ATPase, subunit K	GO:0016021^cellular_component^integral to membrane`GO:0005753^cellular_component^mitochondrial proton-transporting ATP synthase complex`GO:0045263^cellular_component^proton-transporting ATP synthase complex, coupling factor F(o)`GO:0015078^molecular_function^hydrogen ion transmembrane transporter activity`GO:0008289^molecular_function^lipid binding`GO:0005215^molecular_function^transporter activi…
comp10383_c0_seq1	-1.02998	-0.509607	0.623794	1	3.80735	3.58496	3.58496	3.80735	comp10383_c0	.	.	.	.	.	.	.	.	.	.	.
comp10384_c0_seq1	1.27285	-1.71233	0.606092	1	1.58496	1.58496	3.70044	-Inf	comp10384_c0	.	.	.	.	.	.	.	.	.	.	.
comp10385_c0_seq1	-1.21964	7.74231	0.47386	1	11.9381	13.4201	11.5358	10.9322	comp10385_c0	sp|P53506|ACT8_XENLA^P53506^Q:261-1,H:1-87^100%ID^E:-45.25^RecName: Full=Actin, cytoplasmic type 8;^Eukaryota; Metazoa; Chordata; Craniata; Vertebrata; Euteleostomi; Amphibia; Batrachia; Anura; Pipoidea; Pipidae; Xenopodinae; Xenopus; Xenopus	.	.	.	.	.	.	.	.	GO:0005737^cellular_component^cytoplasm`GO:0005856^cellular_component^cytoskeleton`GO:0005524^molecular_function^ATP binding	.
comp10387_c0_seq1	2.25293	-1.53613	0.367782	1	0	3.58496	3.16993	1	comp10387_c0	.	.	.	.	.	.	.	.	.	.	.
comp10388_c0_seq1	5.27127	-1.28258	0.264051	1	-Inf	4.58496	2.58496	1	comp10388_c0	.	.	.	.	.	.	.	.	.	.	.
comp10389_c0_seq1	0.486037	-1.22994	1	1	1	4.16993	2.32193	2.80735	comp10389_c0	.	.	.	.	.	.	.	.	.	.	.
comp10390_c0_seq1	0.74162	-1.6042	0.868511	1	1	3.16993	2.58496	2.32193	comp10390_c0	.	.	.	.	.	.	.	.	.	.	.
comp10393_c0_seq1	-0.228632	-0.941079	1	1	2.58496	4.32193	3.16993	2.32193	comp10393_c0	sp|P11369|POL2_MOUSE^P11369^Q:27-359,H:1054-1164^31.5315%ID^E:-13.36^RecName: Full=Retrovirus-related Pol polyprotein LINE-1;^Eukaryota; Metazoa; Chordata; Craniata; Vertebrata; Euteleostomi; Mammalia; Eutheria; Euarchontoglires; Glires; Rodentia; Sciurognathi; Muroidea; Muridae; Murinae; Mus; Mus	.	.	.	.	.	.	.	.	GO:0004519^molecular_function^endonuclease activity`GO:0046872^molecular_function^metal ion binding`GO:0003723^molecular_function^RNA binding`GO:0003964^molecular_function^RNA-directed DNA polymerase activity`GO:0090305^biological_process^nucleic acid phosphodiester bond hydrolysis`GO:0006278^biological_process^RNA-dependent DNA replication	.
comp10394_c0_seq1	4.3457	8.2931	0.0321279	0.640943	8.37938	14.1215	13.5428	11.8541	comp10394_c0	.	.	m.4269	222-605[-]	.	.	.	.	.	.
comp10395_c0_seq1	-0.79321	-1.04345	0.867194	1	2	4.24793	2	3.32193	comp10395_c0	.	.	.	.	.	.	.	.	.	.	.
comp10397_c0_seq1	3.36091	2.14226	0.14687	1	2.32193	7.48382	6.52356	7.22882	comp10397_c0	.	.	.	.	.	.	.	.	.	.	.
comp10398_c0_seq1	1.89752	-1.44294	0.50708	1	0	3.58496	2.80735	2.58496	comp10398_c0	.	.	.	.	.	.	.	.	.	.	.
comp10399_c0_seq1	5.27127	-1.36248	0.264607	1	-Inf	4.58496	2.58496	-Inf	comp10399_c0	.	.	.	.	.	.	.	.	.	.	.
comp104_c0_seq1	-1.73893	-2.23512	0.515888	1	2	2	1	0	comp104_c0	.	.	.	.	.	.	.	.	.	.	.
comp104_c0_seq2	0.958666	-2.0745	0.870313	1	1	0	2.80735	1.58496	comp104_c0	.	.	.	.	.	.	.	.	.	.	.
comp1040_c0_seq1	2.86195	-1.66328	1	1	-Inf	1	0	4.08746	comp1040_c0	.	.	.	.	.	.	.	.	.	.	.
comp10401_c0_seq1	0.168352	-1.70512	1	1	0	3	1	3.16993	comp10401_c0	.	.	.	.	.	.	.	.	.	.	.
comp10402_c0_seq1	7.74644	9.68321	0.00465642	0.398415	6.26679	15.5143	14.8322	13.6765	comp10402_c0	sp|A1L595|K1C17_BOVIN^A1L595^Q:2-658,H:224-441^70.7763%ID^E:-81.76^RecName: Full=Keratin, type I cytoskeletal 17;^Eukaryota; Metazoa; Chordata; Craniata; Vertebrata; Euteleostomi; Mammalia; Eutheria; Laurasiatheria; Cetartiodactyla; Ruminantia; Pecora; Bovidae; Bovinae; Bos	.	m.4271	2-661[+]	sp|A1L595|K1C17_BOVIN^A1L595^Q:1-219,H:224-441^70.7763%ID^E:-82.12^RecName: Full=Keratin, type I cytoskeletal 17;^Eukaryota; Metazoa; Chordata; Craniata; Vertebrata; Euteleostomi; Mammalia; Eutheria; Laurasiatheria; Cetartiodactyla; Ruminantia; Pecora; Bovidae; Bovinae; Bos	PF00038.16^Filament^Intermediate filament protein^1-178^E:1.5e-66	.	.	NOG148784^Protein involved in cell differentiation involved in embryonic placenta development	GO:0071944^cellular_component^cell periphery`GO:0005737^cellular_component^cytoplasm`GO:0005882^cellular_component^intermediate filament`GO:0032395^molecular_function^MHC class II receptor activity`GO:0005198^molecular_function^structural molecule activity`GO:0045109^biological_process^intermediate filament organization`GO:0031424^biological_process^keratinization`GO:0002009^biological_process^mo…
comp10403_c0_seq1	-1.50545	-1.83552	0.53683	1	2.32193	2.58496	1.58496	1.58496	comp10403_c0	.	.	.	.	.	.	.	.	.	.	.
comp10404_c0_seq1	-0.226806	-1.43292	1	1	2	2.80735	2.58496	3	comp10404_c0	.	.	.	.	.	.	.	.	.	.	.
comp10405_c0_seq1	-0.785489	-1.35064	0.831857	1	1.58496	4.24793	1.58496	2	comp10405_c0	.	.	.	.	.	.	.	.	.	.	.
comp10407_c0_seq1	2.66167	-1.31593	0.280365	1	0	3.58496	3.58496	2	comp10407_c0	.	.	.	.	.	.	.	.	.	.	.
comp10408_c0_seq1	1.59901	-0.963334	0.603111	1	1	4.64386	3.45943	1.58496	comp10408_c0	.	.	m.4274	36-407[-]	.	.	.	.	.	.
comp10409_c0_seq1	-1.77716	-1.42311	0.453245	1	3	3.16993	2	2	comp10409_c0	.	.	.	.	.	.	.	.	.	.	.
comp10411_c0_seq1	0.53216	9.55121	0.797932	1	12.5805	15.3712	13.93	13.6072	comp10411_c0	sp|P40121|CAPG_HUMAN^P40121^Q:1139-135,H:12-347^62.5%ID^E:-117.67^RecName: Full=Macrophage-capping protein;^Eukaryota; Metazoa; Chordata; Craniata; Vertebrata; Euteleostomi; Mammalia; Eutheria; Euarchontoglires; Primates; Haplorrhini; Catarrhini; Hominidae; Homo	.	m.4275	129-1142[-]	sp|P40121|CAPG_HUMAN^P40121^Q:2-336,H:12-347^62.5%ID^E:-117.87^RecName: Full=Macrophage-capping protein;^Eukaryota; Metazoa; Chordata; Craniata; Vertebrata; Euteleostomi; Mammalia; Eutheria; Euarchontoglires; Primates; Haplorrhini; Catarrhini; Hominidae; Homo	PF00626.17^Gelsolin^Gelsolin repeat^20-97^E:8.7e-16`PF00626.17^Gelsolin^Gelsolin repeat^136-208^E:2.3e-19`PF00626.17^Gelsolin^Gelsolin repeat^259-326^E:2.8e-12	.	.	.	GO:0005737^cellular_component^cytoplasm`GO:0008290^cellular_component^F-actin capping protein complex`GO:0042470^cellular_component^melanosome`GO:0031965^cellular_component^nuclear membrane`GO:0005730^cellular_component^nucleolus`GO:0051016^biological_process^barbed-end actin filament capping`GO:0030031^biological_process^cell projection assembly`GO:0006461^biological_process^protein complex asse…
comp10414_c0_seq1	-0.136668	-0.980655	1	1	2.32193	2.32193	3	4.16993	comp10414_c0	.	.	.	.	.	.	.	.	.	.	.
comp10415_c0_seq1	-0.0791436	-0.45841	1	1	2.58496	4.90689	3.32193	3.80735	comp10415_c0	sp|Q92478|CLC2B_HUMAN^Q92478^Q:20-376,H:29-147^37.8151%ID^E:-22.05^RecName: Full=C-type lectin domain family 2 member B;^Eukaryota; Metazoa; Chordata; Craniata; Vertebrata; Euteleostomi; Mammalia; Eutheria; Euarchontoglires; Primates; Haplorrhini; Catarrhini; Hominidae; Homo	.	m.4277	2-382[+]	sp|Q92478|CLC2B_HUMAN^Q92478^Q:7-125,H:29-147^37.8151%ID^E:-22.05^RecName: Full=C-type lectin domain family 2 member B;^Eukaryota; Metazoa; Chordata; Craniata; Vertebrata; Euteleostomi; Mammalia; Eutheria; Euarchontoglires; Primates; Haplorrhini; Catarrhini; Hominidae; Homo	PF00059.16^Lectin_C^Lectin C-type domain^32-123^E:1.1e-07	.	.	.	GO:0005887^cellular_component^integral to plasma membrane`GO:0030246^molecular_function^carbohydrate binding
comp10416_c0_seq1	0.180111	-1.2725	1	1	2.58496	3.32193	3.58496	0	comp10416_c0	.	.	.	.	.	.	.	.	.	.	.
comp10419_c0_seq1	-0.614747	-0.684472	0.847966	1	2.80735	4.75489	3	3	comp10419_c0	.	.	.	.	.	.	.	.	.	.	.
comp1042_c0_seq1	-1.79033	-1.38443	0.387324	1	3.58496	2.80735	2.58496	-Inf	comp1042_c0	.	.	.	.	.	.	.	.	.	.	.
comp10421_c0_seq1	0.590107	3.15254	0.751875	1	6.65821	7.71425	8.06609	7.53138	comp10421_c0	.	.	.	.	.	.	.	.	.	.	.
comp10423_c0_seq1	1.83684	-1.00535	0.493283	1	1	3.45943	3.70044	3.45943	comp10423_c0	sp|Q86Y25|Z354C_HUMAN^Q86Y25^Q:340-227,H:248-285^73.6842%ID^E:-9.19^RecName: Full=Zinc finger protein 354C;^Eukaryota; Metazoa; Chordata; Craniata; Vertebrata; Euteleostomi; Mammalia; Eutheria; Euarchontoglires; Primates; Haplorrhini; Catarrhini; Hominidae; Homo	.	.	.	.	.	.	.	COG5048^FOG: Zn-finger	GO:0005634^cellular_component^nucleus`GO:0003677^molecular_function^DNA binding`GO:0046872^molecular_function^metal ion binding`GO:0008270^molecular_function^zinc ion binding`GO:0006355^biological_process^regulation of transcription, DNA-dependent`GO:0006351^biological_process^transcription, DNA-dependent	.
comp10424_c0_seq1	-4.1887	0.856573	0.0695389	0.914116	6.20945	5.42626	2.80735	2.58496	comp10424_c0	.	.	.	.	.	.	.	.	.	.	.
comp10426_c0_seq1	-1.58682	-1.29223	0.545169	1	2.80735	3.80735	2	2	comp10426_c0	.	.	.	.	.	.	.	.	.	.	.
comp10429_c0_seq1	1.13073	8.20167	0.527601	1	10.6239	13.6771	12.572	13.0372	comp10429_c0	sp|P84104|SRSF3_MOUSE^P84104^Q:723-685,H:135-147^100%ID^E:-47.9107^RecName: Full=Serine/arginine-rich splicing factor 3;^Eukaryota; Metazoa; Chordata; Craniata; Vertebrata; Euteleostomi; Mammalia; Eutheria; Euarchontoglires; Glires; Rodentia; Sciurognathi; Muroidea; Muridae; Murinae; Mus; Mus	.	.	.	.	.	.	.	.	GO:0016607^cellular_component^nuclear speck`GO:0000166^molecular_function^nucleotide binding`GO:0003723^molecular_function^RNA binding`GO:0008286^biological_process^insulin receptor signaling pathway`GO:0006397^biological_process^mRNA processing`GO:0008380^biological_process^RNA splicing	.
comp10429_c0_seq2	1.23499	7.34913	0.450877	1	9.6987	12.0112	11.7511	12.6636	comp10429_c0	sp|P84104|SRSF3_MOUSE^P84104^Q:723-685,H:135-147^100%ID^E:-47.8826^RecName: Full=Serine/arginine-rich splicing factor 3;^Eukaryota; Metazoa; Chordata; Craniata; Vertebrata; Euteleostomi; Mammalia; Eutheria; Euarchontoglires; Glires; Rodentia; Sciurognathi; Muroidea; Muridae; Murinae; Mus; Mus	.	.	.	.	.	.	.	.	GO:0016607^cellular_component^nuclear speck`GO:0000166^molecular_function^nucleotide binding`GO:0003723^molecular_function^RNA binding`GO:0008286^biological_process^insulin receptor signaling pathway`GO:0006397^biological_process^mRNA processing`GO:0008380^biological_process^RNA splicing	.
comp1043_c0_seq1	-2.95166	-2.00927	0.373938	1	2.32193	2	0	2	comp1043_c0	.	.	.	.	.	.	.	.	.	.	.
comp10431_c0_seq1	-1.17312	8.01443	0.503297	1	12.9133	10.4848	12.5575	10.8673	comp10431_c0	sp|Q14532|K1H2_HUMAN^Q14532^Q:506-450,H:45-63^68.4211%ID^E:-0.49^RecName: Full=Keratin, type I cuticular Ha2;^Eukaryota; Metazoa; Chordata; Craniata; Vertebrata; Euteleostomi; Mammalia; Eutheria; Euarchontoglires; Primates; Haplorrhini; Catarrhini; Hominidae; Homo	.	m.4281	1-510[+]	.	.	.	.	.	.
comp10432_c0_seq1	0.97572	9.06133	0.621377	1	11.5522	14.2453	13.3453	14.1522	comp10432_c0	sp|P62995|TRA2B_HUMAN^P62995^Q:452-772,H:110-216^95.3271%ID^E:-57.2866^RecName: Full=Transformer-2 protein homolog beta;^Eukaryota; Metazoa; Chordata; Craniata; Vertebrata; Euteleostomi; Mammalia; Eutheria; Euarchontoglires; Primates; Haplorrhini; Catarrhini; Hominidae; Homo	.	m.4282	62-994[+]	sp|Q3ZBT6|TRA2B_BOVIN^Q3ZBT6^Q:131-310,H:110-288^89.6175%ID^E:-132.911^RecName: Full=Transformer-2 protein homolog beta;^Eukaryota; Metazoa; Chordata; Craniata; Vertebrata; Euteleostomi; Mammalia; Eutheria; Laurasiatheria; Cetartiodactyla; Ruminantia; Pecora; Bovidae; Bovinae; Bos	PF00076.17^RRM_1^RNA recognition motif. (a.k.a. RRM, RBD, or RNP domain)^143-211^E:3.3e-20`PF14259.1^RRM_6^RNA recognition motif (a.k.a. RRM, RBD, or RNP domain)^145-211^E:1.5e-14`PF13893.1^RRM_5^RNA recognition motif. (a.k.a. RRM, RBD, or RNP domain)^155-215^E:7e-10	.	.	.	GO:0005634^cellular_component^nucleus`GO:0003729^molecular_function^mRNA binding`GO:0000166^molecular_function^nucleotide binding`GO:0000398^biological_process^mRNA splicing, via spliceosome`GO:0048026^biological_process^positive regulation of mRNA splicing, via spliceosome`GO:0000381^biological_process^regulation of alternative mRNA splicing, via spliceosome
comp10433_c0_seq1	1.89752	-1.26374	0.505757	1	0	4.45943	2.80735	1	comp10433_c0	.	.	.	.	.	.	.	.	.	.	.
comp10434_c0_seq1	-0.797918	-1.22671	0.799725	1	2.32193	4.32193	2.32193	1	comp10434_c0	.	.	.	.	.	.	.	.	.	.	.
comp10435_c0_seq1	-1.33449	-1.93377	0.61951	1	1.58496	3.16993	1	1	comp10435_c0	.	.	.	.	.	.	.	.	.	.	.
comp10436_c0_seq1	0.702478	3.65369	0.691358	1	6.83289	8.77479	8.35315	8.11374	comp10436_c0	.	.	m.4285	1562-1888[-]	.	.	.	.	.	.
comp10436_c0_seq1	0.702478	3.65369	0.691358	1	6.83289	8.77479	8.35315	8.11374	comp10436_c0	.	.	m.4284	243-590[-]	.	.	.	.	.	.
comp10437_c0_seq1	-7.79423	-1.51954	0.0345909	0.664388	4.32193	-Inf	-Inf	-Inf	comp10437_c0	.	.	.	.	.	.	.	.	.	.	.
comp10439_c0_seq1	2.40242	-1.3708	0.318733	1	0	3	3.32193	3	comp10439_c0	.	.	.	.	.	.	.	.	.	.	.
comp10440_c0_seq1	-1.10874	-1.55412	0.677368	1	2.32193	2.32193	2	3	comp10440_c0	.	.	.	.	.	.	.	.	.	.	.
comp10441_c0_seq1	1.15883	-0.770436	0.6568	1	1.58496	4.24793	3.58496	3.58496	comp10441_c0	.	.	m.4286	1-426[+]	.	.	.	.	.	.
comp10442_c0_seq1	-0.808391	-0.97413	0.695463	1	3.45943	3.16993	3.45943	2.32193	comp10442_c0	.	.	.	.	.	.	.	.	.	.	.
comp10443_c0_seq1	-0.127132	2.31025	0.951221	1	6.22882	7.03342	6.91886	6.50779	comp10443_c0	.	.	.	.	.	.	.	.	.	.	.
comp10444_c0_seq1	0.486037	-1.91638	1	1	1	2.58496	2.32193	1.58496	comp10444_c0	.	.	.	.	.	.	.	.	.	.	.
comp10445_c0_seq1	5.48831	-1.76857	0.268409	1	-Inf	0	2.80735	3.32193	comp10445_c0	.	.	.	.	.	.	.	.	.	.	.
comp10446_c0_seq1	-0.395421	-0.927917	0.918875	1	2.58496	4.16993	3	3	comp10446_c0	.	.	.	.	.	.	.	.	.	.	.
comp10447_c0_seq1	0.486037	-1.65511	1	1	1	3.16993	2.32193	2.32193	comp10447_c0	.	.	.	.	.	.	.	.	.	.	.
comp10448_c0_seq1	-0.221499	-1.35636	1	1	1	4.24793	1.58496	2.32193	comp10448_c0	.	.	.	.	.	.	.	.	.	.	.
comp10449_c0_seq1	-2.6765	-0.914582	0.237912	1	3.90689	3.16993	2	3.16993	comp10449_c0	sp|Q2KIC2|ETV1_BOVIN^Q2KIC2^Q:431-264,H:422-477^91.0714%ID^E:-26.78^RecName: Full=ETS translocation variant 1;^Eukaryota; Metazoa; Chordata; Craniata; Vertebrata; Euteleostomi; Mammalia; Eutheria; Laurasiatheria; Cetartiodactyla; Ruminantia; Pecora; Bovidae; Bovinae; Bos	.	.	.	.	.	.	.	.	GO:0005634^cellular_component^nucleus`GO:0043565^molecular_function^sequence-specific DNA binding`GO:0003700^molecular_function^sequence-specific DNA binding transcription factor activity`GO:0007411^biological_process^axon guidance`GO:0007638^biological_process^mechanosensory behavior`GO:0007517^biological_process^muscle organ development`GO:0045893^biological_process^positive regulation of trans…	.
comp1045_c0_seq1	-0.79321	-1.65824	0.868695	1	2	3.45943	2	1	comp1045_c0	.	.	.	.	.	.	.	.	.	.	.
comp10450_c0_seq1	-2.09586	-1.38061	0.383654	1	3.32193	2.32193	2	2.58496	comp10450_c0	.	.	.	.	.	.	.	.	.	.	.
comp10451_c0_seq1	0.958666	-1.24886	0.867527	1	1	3.90689	2.80735	2.80735	comp10451_c0	.	.	.	.	.	.	.	.	.	.	.
comp10454_c0_seq1	1.47697	-0.634841	0.552466	1	1.58496	4.24793	3.90689	3.80735	comp10454_c0	.	.	.	.	.	.	.	.	.	.	.
comp10455_c0_seq1	0.182147	0.371263	0.944559	1	4.90689	0	5.90689	1	comp10455_c0	sp|P62893|RL39_RAT^P62893^Q:309-268,H:38-51^100%ID^E:-0.72^RecName: Full=60S ribosomal protein L39;^Eukaryota; Metazoa; Chordata; Craniata; Vertebrata; Euteleostomi; Mammalia; Eutheria; Euarchontoglires; Glires; Rodentia; Sciurognathi; Muroidea; Muridae; Murinae; Rattus	.	.	.	.	.	.	.	COG2167^Ribosomal protein L39E	GO:0005840^cellular_component^ribosome`GO:0003735^molecular_function^structural constituent of ribosome`GO:0006412^biological_process^translation	.
comp10456_c0_seq1	-2.53253	-1.93054	0.287798	1	2.80735	2	1	1	comp10456_c0	.	.	.	.	.	.	.	.	.	.	.
comp10457_c0_seq1	0.958666	-1.52435	0.868253	1	1	2.32193	2.80735	3.16993	comp10457_c0	sp|P14270|PDE4D_RAT^P14270^Q:1-249,H:201-283^95.1807%ID^E:-38.64^RecName: Full=cAMP-specific 3',5'-cyclic phosphodiesterase 4D;^Eukaryota; Metazoa; Chordata; Craniata; Vertebrata; Euteleostomi; Mammalia; Eutheria; Euarchontoglires; Glires; Rodentia; Sciurognathi; Muroidea; Muridae; Murinae; Rattus	.	.	.	.	.	.	.	NOG122287^Phosphodiesterase	GO:0005813^cellular_component^centrosome`GO:0005794^cellular_component^Golgi apparatus`GO:0016020^cellular_component^membrane`GO:0030016^cellular_component^myofibril`GO:0004115^molecular_function^3',5'-cyclic-AMP phosphodiesterase activity`GO:0030552^molecular_function^cAMP binding`GO:0046872^molecular_function^metal ion binding`GO:0006198^biological_process^cAMP catabolic process`GO:0043623^biol…	.
comp10459_c0_seq1	-0.801089	-1.33225	0.723562	1	2.58496	2.80735	2.58496	3	comp10459_c0	.	.	.	.	.	.	.	.	.	.	.
comp1046_c0_seq1	1.89752	-1.98742	0.512816	1	0	2.58496	2.80735	0	comp1046_c0	.	.	.	.	.	.	.	.	.	.	.
comp10461_c0_seq1	-0.803369	-0.463183	0.758763	1	2.80735	5	2.80735	3.80735	comp10461_c0	sp|Q1KKZ4|HXAAB_TAKRU^Q1KKZ4^Q:217-14,H:27-94^50%ID^E:-12.65^RecName: Full=Homeobox protein Hox-A10b;^Eukaryota; Metazoa; Chordata; Craniata; Vertebrata; Euteleostomi; Actinopterygii; Neopterygii; Teleostei; Euteleostei; Neoteleostei; Acanthomorpha; Acanthopterygii; Percomorpha; Tetraodontiformes; Tetradontoidea; Tetraodontidae; Takifugu	.	.	.	.	.	.	.	.	GO:0005634^cellular_component^nucleus`GO:0043565^molecular_function^sequence-specific DNA binding`GO:0003700^molecular_function^sequence-specific DNA binding transcription factor activity`GO:0007275^biological_process^multicellular organismal development`GO:0006351^biological_process^transcription, DNA-dependent	.
comp10462_c0_seq1	-1.58682	-1.32546	0.545423	1	2.80735	2.80735	2	3.16993	comp10462_c0	.	.	.	.	.	.	.	.	.	.	.
comp10464_c0_seq1	-0.221499	-1.67761	1	1	1	3.58496	1.58496	2	comp10464_c0	.	.	.	.	.	.	.	.	.	.	.
comp10465_c0_seq1	0.17763	-0.892623	1	1	1.58496	3.32193	2.58496	4.39232	comp10465_c0	.	.	.	.	.	.	.	.	.	.	.
comp10466_c0_seq1	-0.300601	-0.312953	0.895023	1	3.80735	3.80735	4.32193	3.70044	comp10466_c0	.	.	.	.	.	.	.	.	.	.	.
comp10469_c0_seq1	-0.00976039	-1.35191	1	1	2	3	2.80735	3	comp10469_c0	.	.	.	.	.	.	.	.	.	.	.
comp1047_c0_seq1	-0.388775	-1.33574	1	1	1.58496	3.45943	2	3.32193	comp1047_c0	.	.	.	.	.	.	.	.	.	.	.
comp10471_c0_seq1	0.958666	-1.14198	0.867329	1	1	4	2.80735	3.16993	comp10471_c0	sp|O43298|ZBT43_HUMAN^O43298^Q:1-363,H:312-431^74.3802%ID^E:-48.03^RecName: Full=Zinc finger and BTB domain-containing protein 43;^Eukaryota; Metazoa; Chordata; Craniata; Vertebrata; Euteleostomi; Mammalia; Eutheria; Euarchontoglires; Primates; Haplorrhini; Catarrhini; Hominidae; Homo	.	m.4288	1-366[+]	sp|O43298|ZBT43_HUMAN^O43298^Q:1-121,H:312-431^74.3802%ID^E:-48.03^RecName: Full=Zinc finger and BTB domain-containing protein 43;^Eukaryota; Metazoa; Chordata; Craniata; Vertebrata; Euteleostomi; Mammalia; Eutheria; Euarchontoglires; Primates; Haplorrhini; Catarrhini; Hominidae; Homo	PF13894.1^zf-C2H2_4^C2H2-type zinc finger^65-84^E:0.0051`PF00096.21^zf-C2H2^Zinc finger, C2H2 type^66-84^E:0.012`PF13912.1^zf-C2H2_6^C2H2-type zinc finger^66-73^E:100`PF13465.1^zf-H2C2_2^Zinc-finger double domain^79-100^E:0.00019`PF00096.21^zf-C2H2^Zinc finger, C2H2 type^90-112^E:5.6e-05`PF13912.1^zf-C2H2_6^C2H2-type zinc finger^90-104^E:12`PF13894.1^zf-C2H2_4^C2H2-type zinc finger^92-112^E:0.051…	.	.	COG5048^FOG: Zn-finger	GO:0005634^cellular_component^nucleus`GO:0003677^molecular_function^DNA binding`GO:0046872^molecular_function^metal ion binding`GO:0008270^molecular_function^zinc ion binding`GO:0006355^biological_process^regulation of transcription, DNA-dependent`GO:0006351^biological_process^transcription, DNA-dependent
comp10472_c0_seq1	-0.449812	9.59426	0.829376	1	13.1389	15.1893	13.5064	13.9878	comp10472_c0	sp|P62850|RS24_RAT^P62850^Q:510-340,H:1-57^96.4912%ID^E:-55.9356^RecName: Full=40S ribosomal protein S24;^Eukaryota; Metazoa; Chordata; Craniata; Vertebrata; Euteleostomi; Mammalia; Eutheria; Euarchontoglires; Glires; Rodentia; Sciurognathi; Muroidea; Muridae; Murinae; Rattus	.	m.4290	118-603[-]	sp|P62850|RS24_RAT^P62850^Q:32-161,H:1-130^98.4615%ID^E:-69.42^RecName: Full=40S ribosomal protein S24;^Eukaryota; Metazoa; Chordata; Craniata; Vertebrata; Euteleostomi; Mammalia; Eutheria; Euarchontoglires; Glires; Rodentia; Sciurognathi; Muroidea; Muridae; Murinae; Rattus	PF01282.14^Ribosomal_S24e^Ribosomal protein S24e^54-136^E:6e-37	.	.	COG2004^Ribosomal protein S24E	GO:0022627^cellular_component^cytosolic small ribosomal subunit`GO:0005730^cellular_component^nucleolus`GO:0000166^molecular_function^nucleotide binding`GO:0003735^molecular_function^structural constituent of ribosome`GO:0000462^biological_process^maturation of SSU-rRNA from tricistronic rRNA transcript (SSU-rRNA, 5.8S rRNA, LSU-rRNA)`GO:0006414^biological_process^translational elongation`GO:0006…
comp10473_c0_seq1	-1.63447	-1.2303	0.511087	1	3.16993	2.80735	2.32193	3	comp10473_c0	.	.	.	.	.	.	.	.	.	.	.
comp10474_c0_seq1	-0.171719	9.92115	0.936717	1	13.2293	15.2059	13.8749	14.7841	comp10474_c0	.	.	m.4291	787-1242[-]	sp|P26350|PTMA_MOUSE^P26350^Q:46-151,H:1-111^62.5%ID^E:-29.02^RecName: Full=Prothymosin alpha;^Eukaryota; Metazoa; Chordata; Craniata; Vertebrata; Euteleostomi; Mammalia; Eutheria; Euarchontoglires; Glires; Rodentia; Sciurognathi; Muroidea; Muridae; Murinae; Mus; Mus	PF03247.9^Prothymosin^Prothymosin/parathymosin family^47-151^E:6e-19	.	ExpAA=15.94^PredHel=1^Topology=i23-40o	NOG44821^Prothymosin, alpha protein	GO:0005634^cellular_component^nucleus
comp10475_c0_seq1	-7.72058	-1.57967	0.0367356	0.679141	4.24793	-Inf	-Inf	-Inf	comp10475_c0	sp|Q9D805|CAN9_MOUSE^Q9D805^Q:200-3,H:272-337^69.697%ID^E:-24.49^RecName: Full=Calpain-9;^Eukaryota; Metazoa; Chordata; Craniata; Vertebrata; Euteleostomi; Mammalia; Eutheria; Euarchontoglires; Glires; Rodentia; Sciurognathi; Muroidea; Muridae; Murinae; Mus; Mus	.	.	.	.	.	.	.	.	GO:0005737^cellular_component^cytoplasm`GO:0005509^molecular_function^calcium ion binding`GO:0004198^molecular_function^calcium-dependent cysteine-type endopeptidase activity`GO:0006508^biological_process^proteolysis	.
comp10476_c0_seq1	0.583298	-1.26921	0.890836	1	1.58496	3.70044	3	2.58496	comp10476_c0	.	.	.	.	.	.	.	.	.	.	.
comp10477_c0_seq1	2.40242	-1.18928	0.317293	1	0	3.45943	3.32193	3.32193	comp10477_c0	.	.	.	.	.	.	.	.	.	.	.
comp10479_c0_seq1	1.46908	9.30059	0.473961	1	11.4843	14.1235	13.7708	14.5504	comp10479_c0	sp|Q5RF83|CIRBP_PONAB^Q5RF83^Q:61-312,H:1-84^73.8095%ID^E:-31.2567^RecName: Full=Cold-inducible RNA-binding protein;^Eukaryota; Metazoa; Chordata; Craniata; Vertebrata; Euteleostomi; Mammalia; Eutheria; Euarchontoglires; Primates; Haplorrhini; Catarrhini; Hominidae; Pongo	.	m.4294	61-555[+]	sp|O93235|CIRBA_XENLA^O93235^Q:3-164,H:2-161^68.2635%ID^E:-54.91^RecName: Full=Cold-inducible RNA-binding protein A;^Eukaryota; Metazoa; Chordata; Craniata; Vertebrata; Euteleostomi; Amphibia; Batrachia; Anura; Pipoidea; Pipidae; Xenopodinae; Xenopus; Xenopus	PF00076.17^RRM_1^RNA recognition motif. (a.k.a. RRM, RBD, or RNP domain)^8-78^E:2.7e-23`PF14259.1^RRM_6^RNA recognition motif (a.k.a. RRM, RBD, or RNP domain)^8-78^E:3e-17`PF13893.1^RRM_5^RNA recognition motif. (a.k.a. RRM, RBD, or RNP domain)^24-80^E:2.5e-10	.	.	.	GO:0010494^cellular_component^cytoplasmic stress granule`GO:0005654^cellular_component^nucleoplasm`GO:0005634^cellular_component^nucleus`GO:0019899^molecular_function^enzyme binding`GO:0003730^molecular_function^mRNA 3'-UTR binding`GO:0000166^molecular_function^nucleotide binding`GO:0070181^molecular_function^SSU rRNA binding`GO:0030371^molecular_function^translation repressor activity`GO:0016477…
comp10479_c0_seq1	1.46908	9.30059	0.473961	1	11.4843	14.1235	13.7708	14.5504	comp10479_c0	sp|Q5RF83|CIRBP_PONAB^Q5RF83^Q:61-312,H:1-84^73.8095%ID^E:-31.2567^RecName: Full=Cold-inducible RNA-binding protein;^Eukaryota; Metazoa; Chordata; Craniata; Vertebrata; Euteleostomi; Mammalia; Eutheria; Euarchontoglires; Primates; Haplorrhini; Catarrhini; Hominidae; Pongo	.	m.4295	278-625[+]	.	.	.	.	.	.
comp1048_c0_seq1	2.08614	-1.07647	0.424861	1	0	4	3	3.45943	comp1048_c0	.	.	.	.	.	.	.	.	.	.	.
comp10480_c0_seq1	-0.79321	-1.6426	0.868641	1	2	3.16993	2	2	comp10480_c0	.	.	.	.	.	.	.	.	.	.	.
comp10481_c0_seq1	-0.803369	-1.30058	0.758935	1	2.80735	3.90689	2.80735	-Inf	comp10481_c0	.	.	.	.	.	.	.	.	.	.	.
comp10482_c0_seq1	0.503163	11.2425	0.840083	1	14.3474	16.4829	15.6679	15.9547	comp10482_c0	sp|P51968|RO31_XENLA^P51968^Q:169-723,H:17-201^95.1351%ID^E:-99.02^RecName: Full=Heterogeneous nuclear ribonucleoprotein A3 homolog 1;^Eukaryota; Metazoa; Chordata; Craniata; Vertebrata; Euteleostomi; Amphibia; Batrachia; Anura; Pipoidea; Pipidae; Xenopodinae; Xenopus; Xenopus	.	m.4299	4138-4443[+]	.	.	.	.	.	.
comp10482_c0_seq1	0.503163	11.2425	0.840083	1	14.3474	16.4829	15.6679	15.9547	comp10482_c0	sp|P51968|RO31_XENLA^P51968^Q:169-723,H:17-201^95.1351%ID^E:-99.02^RecName: Full=Heterogeneous nuclear ribonucleoprotein A3 homolog 1;^Eukaryota; Metazoa; Chordata; Craniata; Vertebrata; Euteleostomi; Amphibia; Batrachia; Anura; Pipoidea; Pipidae; Xenopodinae; Xenopus; Xenopus	.	m.4297	163-1323[+]	sp|P51968|RO31_XENLA^P51968^Q:3-385,H:17-372^78.6458%ID^E:-164.06^RecName: Full=Heterogeneous nuclear ribonucleoprotein A3 homolog 1;^Eukaryota; Metazoa; Chordata; Craniata; Vertebrata; Euteleostomi; Amphibia; Batrachia; Anura; Pipoidea; Pipidae; Xenopodinae; Xenopus; Xenopus	PF00076.17^RRM_1^RNA recognition motif. (a.k.a. RRM, RBD, or RNP domain)^15-81^E:2.7e-16`PF14259.1^RRM_6^RNA recognition motif (a.k.a. RRM, RBD, or RNP domain)^15-83^E:3.9e-16`PF13893.1^RRM_5^RNA recognition motif. (a.k.a. RRM, RBD, or RNP domain)^29-81^E:1.9e-05`PF00076.17^RRM_1^RNA recognition motif. (a.k.a. RRM, RBD, or RNP domain)^106-174^E:1.1e-18`PF14259.1^RRM_6^RNA recognition motif (a.k.a…	.	.	.	GO:0005634^cellular_component^nucleus`GO:0030529^cellular_component^ribonucleoprotein complex`GO:0000166^molecular_function^nucleotide binding`GO:0003723^molecular_function^RNA binding
comp10483_c0_seq1	0.543769	1.61264	0.802238	1	4.80735	6.75489	6.16993	6.04439	comp10483_c0	sp|Q5JWR5|DOP1_HUMAN^Q5JWR5^Q:389-63,H:539-647^83.4862%ID^E:-213.781^RecName: Full=Protein dopey-1;^Eukaryota; Metazoa; Chordata; Craniata; Vertebrata; Euteleostomi; Mammalia; Eutheria; Euarchontoglires; Primates; Haplorrhini; Catarrhini; Hominidae; Homo	.	m.4300	60-1340[-]	sp|Q5JWR5|DOP1_HUMAN^Q5JWR5^Q:1-426,H:222-647^93.1925%ID^E:-229.52^RecName: Full=Protein dopey-1;^Eukaryota; Metazoa; Chordata; Craniata; Vertebrata; Euteleostomi; Mammalia; Eutheria; Euarchontoglires; Primates; Haplorrhini; Catarrhini; Hominidae; Homo	.	.	.	COG5221^Dopey and related predicted leucine zipper transcription factors	GO:0015031^biological_process^protein transport
comp10484_c0_seq1	-0.226806	-0.983544	1	1	2	4.32193	2.58496	3.16993	comp10484_c0	sp|P03360|POL_AVIRE^P03360^Q:78-200,H:247-287^39.0244%ID^E:-2.2^RecName: Full=Pol polyprotein;^Viruses; Retro-transcribing viruses; Retroviridae; Orthoretrovirinae; Gammaretrovirus	.	.	.	.	.	.	.	.	GO:0003887^molecular_function^DNA-directed DNA polymerase activity`GO:0003676^molecular_function^nucleic acid binding`GO:0004523^molecular_function^ribonuclease H activity`GO:0003964^molecular_function^RNA-directed DNA polymerase activity`GO:0015074^biological_process^DNA integration`GO:0006310^biological_process^DNA recombination`GO:0075713^biological_process^establishment of integrated proviral…	.
comp10485_c0_seq1	-0.629377	9.35309	0.756969	1	13.1673	14.8379	13.3552	13.5292	comp10485_c0	sp|Q90YU5|RL23_ICTPU^Q90YU5^Q:465-55,H:4-140^99.2701%ID^E:-72.42^RecName: Full=60S ribosomal protein L23;^Eukaryota; Metazoa; Chordata; Craniata; Vertebrata; Euteleostomi; Actinopterygii; Neopterygii; Teleostei; Ostariophysi; Siluriformes; Ictaluridae; Ictalurus	.	m.4302	52-549[-]	sp|Q90YU5|RL23_ICTPU^Q90YU5^Q:26-165,H:1-140^99.2857%ID^E:-74.15^RecName: Full=60S ribosomal protein L23;^Eukaryota; Metazoa; Chordata; Craniata; Vertebrata; Euteleostomi; Actinopterygii; Neopterygii; Teleostei; Ostariophysi; Siluriformes; Ictaluridae; Ictalurus	PF00238.14^Ribosomal_L14^Ribosomal protein L14p/L23e^46-163^E:5.1e-35	.	.	.	GO:0005840^cellular_component^ribosome`GO:0003735^molecular_function^structural constituent of ribosome`GO:0006412^biological_process^translation
comp10486_c0_seq1	-1.73893	-1.72565	0.509806	1	2	2.58496	1	2.80735	comp10486_c0	.	.	.	.	.	.	.	.	.	.	.
comp10487_c0_seq1	-0.447959	-0.890656	0.928182	1	2.80735	3.70044	3.16993	3.45943	comp10487_c0	sp|Q864R9|MRP1_MACFA^Q864R9^Q:270-7,H:7-94^54.5455%ID^E:-27.5^RecName: Full=Multidrug resistance-associated protein 1;^Eukaryota; Metazoa; Chordata; Craniata; Vertebrata; Euteleostomi; Mammalia; Eutheria; Euarchontoglires; Primates; Haplorrhini; Catarrhini; Cercopithecidae; Cercopithecinae; Macaca	.	.	.	.	.	.	.	.	GO:0016021^cellular_component^integral to membrane`GO:0005886^cellular_component^plasma membrane`GO:0005524^molecular_function^ATP binding`GO:0042626^molecular_function^ATPase activity, coupled to transmembrane movement of substances`GO:0006200^biological_process^ATP catabolic process	.
comp10488_c0_seq1	-0.801089	-1.29885	0.72339	1	2.58496	3.80735	2.58496	1.58496	comp10488_c0	.	.	.	.	.	.	.	.	.	.	.
comp1049_c0_seq1	-0.7705	-1.97902	0.771966	1	1	2.58496	1	2.32193	comp1049_c0	.	.	.	.	.	.	.	.	.	.	.
comp10491_c0_seq1	1.72282	-0.985233	0.543588	1	1	3	3.58496	3.90689	comp10491_c0	.	.	.	.	.	.	.	.	.	.	.
comp10496_c0_seq1	-1.16571	13.0929	0.698919	1	17.2322	18.5636	16.8838	16.9398	comp10496_c0	sp|P17508|EF1A3_XENLA^P17508^Q:1807-494,H:1-438^93.379%ID^E:-241.72^RecName: Full=Elongation factor 1-alpha, oocyte form;^Eukaryota; Metazoa; Chordata; Craniata; Vertebrata; Euteleostomi; Amphibia; Batrachia; Anura; Pipoidea; Pipidae; Xenopodinae; Xenopus; Xenopus	.	m.4304	422-1807[-]	sp|P13549|EF1A0_XENLA^P13549^Q:1-460,H:1-460^92.8261%ID^E:-251.04^RecName: Full=Elongation factor 1-alpha, somatic form;^Eukaryota; Metazoa; Chordata; Craniata; Vertebrata; Euteleostomi; Amphibia; Batrachia; Anura; Pipoidea; Pipidae; Xenopodinae; Xenopus; Xenopus	PF00009.22^GTP_EFTU^Elongation factor Tu GTP binding domain^5-237^E:6.9e-56`PF03144.20^GTP_EFTU_D2^Elongation factor Tu domain 2^260-326^E:1.3e-16`PF03143.12^GTP_EFTU_D3^Elongation factor Tu C-terminal domain^334-441^E:2.1e-33	.	.	.	GO:0005737^cellular_component^cytoplasm`GO:0005525^molecular_function^GTP binding`GO:0003924^molecular_function^GTPase activity`GO:0003746^molecular_function^translation elongation factor activity`GO:0006184^biological_process^GTP catabolic process
comp10497_c0_seq1	-1.18993	-1.92803	0.709777	1	2	3.16993	1.58496	-Inf	comp10497_c0	.	.	.	.	.	.	.	.	.	.	.
comp10498_c0_seq1	5.48831	-1.86001	0.26944	1	-Inf	2.32193	2.80735	2.32193	comp10498_c0	.	.	.	.	.	.	.	.	.	.	.
comp10499_c0_seq1	-3.25277	-1.10982	0.153772	1	4.08746	3	1.58496	1.58496	comp10499_c0	sp|Q5M8K0|R9BP_XENTR^Q5M8K0^Q:152-334,H:27-85^57.377%ID^E:-11.97^RecName: Full=Regulator of G-protein signaling 9-binding protein;^Eukaryota; Metazoa; Chordata; Craniata; Vertebrata; Euteleostomi; Amphibia; Batrachia; Anura; Pipoidea; Pipidae; Xenopodinae; Xenopus; Silurana	.	.	.	.	.	.	.	NOG83219^Protein involved in negative regulation of signal transduction	GO:0009968^biological_process^negative regulation of signal transduction	.
comp105_c0_seq1	1.89752	-1.98742	0.512816	1	0	2.58496	2.80735	0	comp105_c0	.	.	.	.	.	.	.	.	.	.	.
comp10500_c0_seq1	-0.137954	0.464209	1	1	3.32193	5.55459	4	5.52356	comp10500_c0	sp|Q96CG3|TIFA_HUMAN^Q96CG3^Q:2-148,H:103-151^65.3061%ID^E:-10.72^RecName: Full=TRAF-interacting protein with FHA domain-containing protein A;^Eukaryota; Metazoa; Chordata; Craniata; Vertebrata; Euteleostomi; Mammalia; Eutheria; Euarchontoglires; Primates; Haplorrhini; Catarrhini; Hominidae; Homo	.	.	.	.	.	.	.	NOG46924^Traf-Interacting protein with forkhead-associated domain-containing protein	GO:0007249^biological_process^I-kappaB kinase/NF-kappaB cascade	.
comp10502_c0_seq1	-1.50545	-1.82724	0.536729	1	2.32193	2.32193	1.58496	2	comp10502_c0	.	.	.	.	.	.	.	.	.	.	.
comp10503_c0_seq1	-1.56274	0.358079	0.456438	1	4.75489	5.61471	4	3.80735	comp10503_c0	sp|Q499U8|TMCO4_RAT^Q499U8^Q:196-264,H:521-543^43.4783%ID^E:-0.56469^RecName: Full=Transmembrane and coiled-coil domain-containing protein 4;^Eukaryota; Metazoa; Chordata; Craniata; Vertebrata; Euteleostomi; Mammalia; Eutheria; Euarchontoglires; Glires; Rodentia; Sciurognathi; Muroidea; Muridae; Murinae; Rattus	.	.	.	.	.	.	.	.	GO:0016021^cellular_component^integral to membrane	.
comp10504_c0_seq1	2.20785	-0.677267	0.320815	1	1.58496	3.58496	4.64386	3	comp10504_c0	.	.	.	.	.	.	.	.	.	.	.
comp10505_c0_seq1	0.49825	-1.16567	0.877897	1	2.58496	2.58496	3.90689	2	comp10505_c0	.	.	.	.	.	.	.	.	.	.	.
comp10509_c0_seq1	2.13312	-0.299233	0.416757	1	1	5.35755	4	3.58496	comp10509_c0	sp|Q866G7|TSCOT_CANFA^Q866G7^Q:539-631,H:392-422^70.9677%ID^E:-40.508^RecName: Full=Thymic stromal cotransporter homolog;^Eukaryota; Metazoa; Chordata; Craniata; Vertebrata; Euteleostomi; Mammalia; Eutheria; Laurasiatheria; Carnivora; Caniformia; Canidae; Canis	.	m.4310	2-634[+]	sp|Q866G7|TSCOT_CANFA^Q866G7^Q:1-18,H:223-240^61.1111%ID^E:-46.9927^RecName: Full=Thymic stromal cotransporter homolog;^Eukaryota; Metazoa; Chordata; Craniata; Vertebrata; Euteleostomi; Mammalia; Eutheria; Laurasiatheria; Carnivora; Caniformia; Canidae; Canis	.	.	ExpAA=77.51^PredHel=4^Topology=i76-98o113-135i142-164o168-190i	.	GO:0016324^cellular_component^apical plasma membrane`GO:0016021^cellular_component^integral to membrane`GO:0005215^molecular_function^transporter activity
comp10510_c0_seq1	0.616761	-0.973315	0.795918	1	2.80735	2.32193	4.24793	2.32193	comp10510_c0	.	.	.	.	.	.	.	.	.	.	.
comp10511_c0_seq1	-0.226806	-0.617898	1	1	2	4.45943	2.58496	4.32193	comp10511_c0	.	.	.	.	.	.	.	.	.	.	.
comp10513_c0_seq1	-0.785489	-1.22064	0.831513	1	1.58496	3.58496	1.58496	3.70044	comp10513_c0	.	.	.	.	.	.	.	.	.	.	.
comp10517_c0_seq1	-1.09017	10.263	0.630476	1	14.9101	14.7729	14.6372	13.2046	comp10517_c0	sp|O77691|S10A6_HORSE^O77691^Q:443-192,H:5-86^30.9524%ID^E:-5.9^RecName: Full=Protein S100-A6;^Eukaryota; Metazoa; Chordata; Craniata; Vertebrata; Euteleostomi; Mammalia; Eutheria; Laurasiatheria; Perissodactyla; Equidae; Equus	.	m.4313	120-458[-]	sp|O77691|S10A6_HORSE^O77691^Q:6-89,H:5-86^30.9524%ID^E:-6.29^RecName: Full=Protein S100-A6;^Eukaryota; Metazoa; Chordata; Craniata; Vertebrata; Euteleostomi; Mammalia; Eutheria; Laurasiatheria; Perissodactyla; Equidae; Equus	PF01023.14^S_100^S-100/ICaBP type calcium binding domain^6-48^E:2.4e-05`PF13833.1^EF_hand_6^EF-hand domain pair^49-80^E:2e-05	.	.	NOG40006^S100 calcium binding protein A6	GO:0005829^cellular_component^cytosol`GO:0031234^cellular_component^extrinsic to internal side of plasma membrane`GO:0005635^cellular_component^nuclear envelope`GO:0048471^cellular_component^perinuclear region of cytoplasm`GO:0001726^cellular_component^ruffle`GO:0005509^molecular_function^calcium ion binding`GO:0008270^molecular_function^zinc ion binding
comp10518_c0_seq1	2.37265	8.5901	0.220987	1	10.1611	13.5893	13.3512	13.6671	comp10518_c0	sp|Q99729|ROAA_HUMAN^Q99729^Q:702-613,H:303-332^86.6667%ID^E:-99.7027^RecName: Full=Heterogeneous nuclear ribonucleoprotein A/B;^Eukaryota; Metazoa; Chordata; Craniata; Vertebrata; Euteleostomi; Mammalia; Eutheria; Euarchontoglires; Primates; Haplorrhini; Catarrhini; Hominidae; Homo	.	m.4315	610-1623[-]	sp|Q99729|ROAA_HUMAN^Q99729^Q:12-18,H:16-22^100%ID^E:-124.731^RecName: Full=Heterogeneous nuclear ribonucleoprotein A/B;^Eukaryota; Metazoa; Chordata; Craniata; Vertebrata; Euteleostomi; Mammalia; Eutheria; Euarchontoglires; Primates; Haplorrhini; Catarrhini; Hominidae; Homo	PF00076.17^RRM_1^RNA recognition motif. (a.k.a. RRM, RBD, or RNP domain)^69-136^E:1.1e-19`PF14259.1^RRM_6^RNA recognition motif (a.k.a. RRM, RBD, or RNP domain)^69-136^E:2.7e-14`PF00076.17^RRM_1^RNA recognition motif. (a.k.a. RRM, RBD, or RNP domain)^152-219^E:1.1e-18`PF14259.1^RRM_6^RNA recognition motif (a.k.a. RRM, RBD, or RNP domain)^152-218^E:8e-14	.	.	COG0724^RNA-binding proteins (RRM domain)	GO:0005737^cellular_component^cytoplasm`GO:0005634^cellular_component^nucleus`GO:0030529^cellular_component^ribonucleoprotein complex`GO:0003729^molecular_function^mRNA binding`GO:0000166^molecular_function^nucleotide binding`GO:0001837^biological_process^epithelial to mesenchymal transition`GO:0045893^biological_process^positive regulation of transcription, DNA-dependent
comp10518_c0_seq2	1.05253	9.25963	0.603134	1	11.4707	14.8192	13.3405	14.2551	comp10518_c0	sp|Q99729|ROAA_HUMAN^Q99729^Q:449-360,H:303-332^86.6667%ID^E:-99.7851^RecName: Full=Heterogeneous nuclear ribonucleoprotein A/B;^Eukaryota; Metazoa; Chordata; Craniata; Vertebrata; Euteleostomi; Mammalia; Eutheria; Euarchontoglires; Primates; Haplorrhini; Catarrhini; Hominidae; Homo	.	m.4318	357-1370[-]	sp|Q99729|ROAA_HUMAN^Q99729^Q:12-18,H:16-22^100%ID^E:-124.731^RecName: Full=Heterogeneous nuclear ribonucleoprotein A/B;^Eukaryota; Metazoa; Chordata; Craniata; Vertebrata; Euteleostomi; Mammalia; Eutheria; Euarchontoglires; Primates; Haplorrhini; Catarrhini; Hominidae; Homo	PF00076.17^RRM_1^RNA recognition motif. (a.k.a. RRM, RBD, or RNP domain)^69-136^E:1.1e-19`PF14259.1^RRM_6^RNA recognition motif (a.k.a. RRM, RBD, or RNP domain)^69-136^E:2.7e-14`PF00076.17^RRM_1^RNA recognition motif. (a.k.a. RRM, RBD, or RNP domain)^152-219^E:1.1e-18`PF14259.1^RRM_6^RNA recognition motif (a.k.a. RRM, RBD, or RNP domain)^152-218^E:8e-14	.	.	COG0724^RNA-binding proteins (RRM domain)	GO:0005737^cellular_component^cytoplasm`GO:0005634^cellular_component^nucleus`GO:0030529^cellular_component^ribonucleoprotein complex`GO:0003729^molecular_function^mRNA binding`GO:0000166^molecular_function^nucleotide binding`GO:0001837^biological_process^epithelial to mesenchymal transition`GO:0045893^biological_process^positive regulation of transcription, DNA-dependent
comp10519_c0_seq1	-2.89101	-1.75115	0.207364	1	3.16993	2.58496	1	0	comp10519_c0	.	.	.	.	.	.	.	.	.	.	.
comp1052_c0_seq1	1.47697	-0.858988	0.552007	1	1.58496	3.80735	3.90689	3.32193	comp1052_c0	.	.	m.70	3-482[+]	.	.	.	.	.	.
comp10522_c0_seq1	-0.649515	1.5965	0.772798	1	5.35755	5.61471	5.52356	6.75489	comp10522_c0	sp|Q17R31|TATD3_HUMAN^Q17R31^Q:89-874,H:7-268^70.6107%ID^E:-103.34^RecName: Full=Putative deoxyribonuclease TATDN3;^Eukaryota; Metazoa; Chordata; Craniata; Vertebrata; Euteleostomi; Mammalia; Eutheria; Euarchontoglires; Primates; Haplorrhini; Catarrhini; Hominidae; Homo	.	m.4321	62-901[+]	sp|Q17R31|TATD3_HUMAN^Q17R31^Q:10-271,H:7-268^70.6107%ID^E:-103.39^RecName: Full=Putative deoxyribonuclease TATDN3;^Eukaryota; Metazoa; Chordata; Craniata; Vertebrata; Euteleostomi; Mammalia; Eutheria; Euarchontoglires; Primates; Haplorrhini; Catarrhini; Hominidae; Homo	PF01026.16^TatD_DNase^TatD related DNase^12-268^E:8e-54	.	.	COG0084^Mg-dependent DNase	GO:0005634^cellular_component^nucleus`GO:0016888^molecular_function^endodeoxyribonuclease activity, producing 5'-phosphomonoesters`GO:0046872^molecular_function^metal ion binding`GO:0090305^biological_process^nucleic acid phosphodiester bond hydrolysis
comp10523_c0_seq1	0.97408	-1.11542	0.645836	1	2	3	3.80735	2.80735	comp10523_c0	.	.	.	.	.	.	.	.	.	.	.
comp10524_c0_seq1	1.68047	-1.10668	0.504925	1	0	3.32193	2.58496	4.08746	comp10524_c0	.	.	.	.	.	.	.	.	.	.	.
comp10525_c0_seq1	5.27127	-1.55433	0.266221	1	-Inf	0	2.58496	3.90689	comp10525_c0	.	.	.	.	.	.	.	.	.	.	.
comp10526_c0_seq1	2.25293	-1.65499	0.369161	1	0	3	3.16993	1.58496	comp10526_c0	sp|P38401|GNAI1_CAVPO^P38401^Q:5-247,H:43-123^61.7284%ID^E:-19.62^RecName: Full=Guanine nucleotide-binding protein G(i) subunit alpha-1;^Eukaryota; Metazoa; Chordata; Craniata; Vertebrata; Euteleostomi; Mammalia; Eutheria; Euarchontoglires; Glires; Rodentia; Hystricognathi; Caviidae; Cavia	.	.	.	.	.	.	.	.	GO:0005813^cellular_component^centrosome`GO:0005794^cellular_component^Golgi apparatus`GO:0030496^cellular_component^midbody`GO:0005634^cellular_component^nucleus`GO:0005886^cellular_component^plasma membrane`GO:0005525^molecular_function^GTP binding`GO:0046872^molecular_function^metal ion binding`GO:0004871^molecular_function^signal transducer activity`GO:0007049^biological_process^cell cycle`GO…	.
comp10527_c0_seq1	-3.96966	-0.649308	0.0792703	0.985275	4.80735	3.70044	1.58496	-Inf	comp10527_c0	.	.	m.4322	3-344[+]	.	.	.	.	.	.
comp10528_c0_seq1	-1.96776	0.745876	0.366344	1	5.24793	6.24793	4.08746	3.58496	comp10528_c0	.	.	.	.	.	.	.	.	.	.	.
comp10530_c0_seq1	-1.37637	10.4733	0.554943	1	14.7482	15.8277	14.1892	14.2928	comp10530_c0	sp|P63244|GBLP_HUMAN^P63244^Q:1026-76,H:1-317^95.5836%ID^E:-183.06^RecName: Full=Guanine nucleotide-binding protein subunit beta-2-like 1;^Eukaryota; Metazoa; Chordata; Craniata; Vertebrata; Euteleostomi; Mammalia; Eutheria; Euarchontoglires; Primates; Haplorrhini; Catarrhini; Hominidae; Homo	.	m.4323	73-1026[-]	sp|P63247|GBLP_CHICK^P63247^Q:1-317,H:1-317^95.5836%ID^E:-183.19^RecName: Full=Guanine nucleotide-binding protein subunit beta-2-like 1;^Eukaryota; Metazoa; Chordata; Craniata; Vertebrata; Euteleostomi; Archosauria; Dinosauria; Saurischia; Theropoda; Coelurosauria; Aves; Neognathae; Galliformes; Phasianidae; Phasianinae; Gallus	PF00400.27^WD40^WD domain, G-beta repeat^9-44^E:8e-07`PF00400.27^WD40^WD domain, G-beta repeat^55-91^E:4.5e-11`PF00400.27^WD40^WD domain, G-beta repeat^96-133^E:2.9e-11`PF00400.27^WD40^WD domain, G-beta repeat^145-178^E:3.2e-08`PF08662.6^eIF2A^Eukaryotic translation initiation factor eIF2A^148-274^E:6.3e-05`PF00400.27^WD40^WD domain, G-beta repeat^183-220^E:1.1e-08`PF00400.27^WD40^WD domain, G-be…	.	.	COG2319^FOG: WD40 repeat	GO:0005737^cellular_component^cytoplasm`GO:0030425^cellular_component^dendrite`GO:0030496^cellular_component^midbody`GO:0043025^cellular_component^neuronal cell body`GO:0005634^cellular_component^nucleus`GO:0048471^cellular_component^perinuclear region of cytoplasm`GO:0001891^cellular_component^phagocytic cup`GO:0008200^molecular_function^ion channel inhibitor activity`GO:0030292^molecular_functi…
comp10531_c0_seq1	-0.488811	-0.765451	0.807377	1	3	4.16993	3.32193	3.16993	comp10531_c0	.	.	.	.	.	.	.	.	.	.	.
comp10532_c0_seq2	-3.59079	-1.83814	1	1	0	4.16993	-Inf	-Inf	comp10532_c0	.	.	.	.	.	.	.	.	.	.	.
comp10534_c0_seq1	-1.01275	10.0656	0.64751	1	14.0899	15.6554	13.8944	13.882	comp10534_c0	sp|P26373|RL13_HUMAN^P26373^Q:197-661,H:40-194^90.3226%ID^E:-89.0373^RecName: Full=60S ribosomal protein L13;^Eukaryota; Metazoa; Chordata; Craniata; Vertebrata; Euteleostomi; Mammalia; Eutheria; Euarchontoglires; Primates; Haplorrhini; Catarrhini; Hominidae; Homo	.	m.4324	80-715[+]	sp|P26373|RL13_HUMAN^P26373^Q:1-211,H:1-211^91.4692%ID^E:-108^RecName: Full=60S ribosomal protein L13;^Eukaryota; Metazoa; Chordata; Craniata; Vertebrata; Euteleostomi; Mammalia; Eutheria; Euarchontoglires; Primates; Haplorrhini; Catarrhini; Hominidae; Homo	PF01294.13^Ribosomal_L13e^Ribosomal protein L13e^8-185^E:1.4e-90	.	.	COG4352^Ribosomal protein L13E	GO:0022625^cellular_component^cytosolic large ribosomal subunit`GO:0003723^molecular_function^RNA binding`GO:0003735^molecular_function^structural constituent of ribosome`GO:0000184^biological_process^nuclear-transcribed mRNA catabolic process, nonsense-mediated decay`GO:0006614^biological_process^SRP-dependent cotranslational protein targeting to membrane`GO:0006414^biological_process^translatio…
comp10535_c0_seq1	-1.47888	7.1533	0.360495	1	11.6078	12.0088	10.9462	11.1624	comp10535_c0	.	.	.	.	.	.	.	.	.	.	.
comp10535_c0_seq2	-1.01071	7.06935	0.52495	1	11.5142	10.4656	11.3208	11.5401	comp10535_c0	.	.	.	.	.	.	.	.	.	.	.
comp10536_c0_seq1	-0.136668	-1.45026	1	1	2.32193	3.32193	3	1	comp10536_c0	.	.	.	.	.	.	.	.	.	.	.
comp10537_c0_seq1	1.03502	-1.0664	0.722483	1	1.58496	4	3.45943	2.58496	comp10537_c0	.	.	.	.	.	.	.	.	.	.	.
comp10539_c0_seq1	1.59901	-1.47673	0.605974	1	1	3.45943	3.45943	0	comp10539_c0	.	.	.	.	.	.	.	.	.	.	.
comp1054_c0_seq1	0.899575	-1.51184	0.724644	1	1.58496	2	3.32193	2.58496	comp1054_c0	.	.	.	.	.	.	.	.	.	.	.
comp10540_c0_seq1	1.72282	-1.68743	0.549008	1	1	2.58496	3.58496	-Inf	comp10540_c0	sp|Q0JKK6|WOX7_ORYSJ^Q0JKK6^Q:180-299,H:194-235^52.381%ID^E:-1.07^RecName: Full=WUSCHEL-related homeobox 7;^Eukaryota; Viridiplantae; Streptophyta; Embryophyta; Tracheophyta; Spermatophyta; Magnoliophyta; Liliopsida; Poales; Poaceae; BEP clade; Ehrhartoideae; Oryzeae; Oryza	.	m.4326	1-318[+]	sp|Q5RCX2|L2GL2_PONAB^Q5RCX2^Q:35-68,H:363-398^38.8889%ID^E:-0.14^RecName: Full=Lethal(2) giant larvae protein homolog 2;^Eukaryota; Metazoa; Chordata; Craniata; Vertebrata; Euteleostomi; Mammalia; Eutheria; Euarchontoglires; Primates; Haplorrhini; Catarrhini; Hominidae; Pongo	.	.	.	.	GO:0005737^cellular_component^cytoplasm`GO:0007049^biological_process^cell cycle`GO:0051301^biological_process^cell division`GO:0006887^biological_process^exocytosis
comp10541_c0_seq1	-0.79321	-0.98282	0.867136	1	2	4.32193	2	3.45943	comp10541_c0	.	.	.	.	.	.	.	.	.	.	.
comp10542_c0_seq1	0.683793	10.0062	0.754919	1	12.7419	14.6407	14.243	15.3168	comp10542_c0	sp|P02316|HMGN1_BOVIN^P02316^Q:312-380,H:4-26^56.5217%ID^E:-4.39979^RecName: Full=Non-histone chromosomal protein HMG-14;^Eukaryota; Metazoa; Chordata; Craniata; Vertebrata; Euteleostomi; Mammalia; Eutheria; Laurasiatheria; Cetartiodactyla; Ruminantia; Pecora; Bovidae; Bovinae; Bos	.	.	.	.	.	.	.	NOG29368^High-Mobility group nucleosome binding domain protein	GO:0000785^cellular_component^chromatin`GO:0005634^cellular_component^nucleus`GO:0031492^molecular_function^nucleosomal DNA binding	.
comp10543_c0_seq1	0.486037	-1.35638	1	1	1	3.70044	2.32193	3	comp10543_c0	.	.	.	.	.	.	.	.	.	.	.
comp10544_c0_seq1	-1.09823	9.20173	0.585214	1	13.2478	14.7261	12.9669	13.1572	comp10544_c0	sp|P62843|RS15_MOUSE^P62843^Q:144-326,H:1-61^76.9231%ID^E:-59.6005^RecName: Full=40S ribosomal protein S15;^Eukaryota; Metazoa; Chordata; Craniata; Vertebrata; Euteleostomi; Mammalia; Eutheria; Euarchontoglires; Glires; Rodentia; Sciurognathi; Muroidea; Muridae; Murinae; Mus; Mus	.	m.4328	144-581[+]	sp|P62846|RS15_CHICK^P62846^Q:1-145,H:1-145^97.931%ID^E:-76.96^RecName: Full=40S ribosomal protein S15;^Eukaryota; Metazoa; Chordata; Craniata; Vertebrata; Euteleostomi; Archosauria; Dinosauria; Saurischia; Theropoda; Coelurosauria; Aves; Neognathae; Galliformes; Phasianidae; Phasianinae; Gallus	PF00203.16^Ribosomal_S19^Ribosomal protein S19^47-128^E:1.2e-35	.	.	COG0185^Ribosomal protein S19	GO:0022627^cellular_component^cytosolic small ribosomal subunit`GO:0003723^molecular_function^RNA binding`GO:0003735^molecular_function^structural constituent of ribosome`GO:0006412^biological_process^translation
comp10546_c0_seq1	-0.7705	-1.66943	0.770286	1	1	3.45943	1	2.58496	comp10546_c0	.	.	.	.	.	.	.	.	.	.	.
comp10547_c0_seq1	-2.86417	1.26413	0.184871	1	6.75489	4.16993	4.70044	1	comp10547_c0	sp|Q5SX39|MYH4_MOUSE^Q5SX39^Q:2-349,H:1220-1335^68.9655%ID^E:-37.72^RecName: Full=Myosin-4;^Eukaryota; Metazoa; Chordata; Craniata; Vertebrata; Euteleostomi; Mammalia; Eutheria; Euarchontoglires; Glires; Rodentia; Sciurognathi; Muroidea; Muridae; Murinae; Mus; Mus	.	m.4329	2-352[+]	sp|Q5SX39|MYH4_MOUSE^Q5SX39^Q:1-116,H:1220-1335^69.8276%ID^E:-40.15^RecName: Full=Myosin-4;^Eukaryota; Metazoa; Chordata; Craniata; Vertebrata; Euteleostomi; Mammalia; Eutheria; Euarchontoglires; Glires; Rodentia; Sciurognathi; Muroidea; Muridae; Murinae; Mus; Mus	PF01576.14^Myosin_tail_1^Myosin tail^1-116^E:1.1e-25	.	.	COG5022^Myosin heavy chain	GO:0030016^cellular_component^myofibril`GO:0032982^cellular_component^myosin filament`GO:0005524^molecular_function^ATP binding`GO:0003774^molecular_function^motor activity`GO:0006936^biological_process^muscle contraction`GO:0014823^biological_process^response to activity
comp10548_c0_seq1	-0.766733	10.4511	0.738998	1	14.3219	15.8488	14.3725	14.7374	comp10548_c0	sp|Q58DW0|RL4_BOVIN^Q58DW0^Q:595-1125,H:166-342^88.7006%ID^E:-164.411^RecName: Full=60S ribosomal protein L4;^Eukaryota; Metazoa; Chordata; Craniata; Vertebrata; Euteleostomi; Mammalia; Eutheria; Laurasiatheria; Cetartiodactyla; Ruminantia; Pecora; Bovidae; Bovinae; Bos	.	m.4330	100-1260[+]	sp|Q9D8E6|RL4_MOUSE^Q9D8E6^Q:1-383,H:1-398^83.4171%ID^E:-188.52^RecName: Full=60S ribosomal protein L4;^Eukaryota; Metazoa; Chordata; Craniata; Vertebrata; Euteleostomi; Mammalia; Eutheria; Euarchontoglires; Glires; Rodentia; Sciurognathi; Muroidea; Muridae; Murinae; Mus; Mus	PF00573.17^Ribosomal_L4^Ribosomal protein L4/L1 family^22-262^E:5e-46`PF14374.1^Ribos_L4_asso_C^60S ribosomal protein L4 C-terminal domain^276-343^E:3.1e-30	.	.	COG0088^Ribosomal protein L4	GO:0022625^cellular_component^cytosolic large ribosomal subunit`GO:0005730^cellular_component^nucleolus`GO:0030529^cellular_component^ribonucleoprotein complex`GO:0003735^molecular_function^structural constituent of ribosome`GO:0006412^biological_process^translation
comp10549_c0_seq1	0.54846	0.875709	0.827061	1	3.58496	6.30378	4.9542	5.49185	comp10549_c0	.	.	.	.	.	.	.	.	.	.	.
comp1055_c0_seq1	-2.31321	-1.62959	0.32154	1	2.58496	3.16993	1	2	comp1055_c0	.	.	.	.	.	.	.	.	.	.	.
comp10550_c0_seq1	0.899575	-0.697297	0.72232	1	1.58496	2.80735	3.32193	4.70044	comp10550_c0	sp|Q9BS31|ZN649_HUMAN^Q9BS31^Q:3-245,H:266-346^59.2593%ID^E:-23.45^RecName: Full=Zinc finger protein 649;^Eukaryota; Metazoa; Chordata; Craniata; Vertebrata; Euteleostomi; Mammalia; Eutheria; Euarchontoglires; Primates; Haplorrhini; Catarrhini; Hominidae; Homo	.	.	.	.	.	.	.	COG5048^FOG: Zn-finger	GO:0005634^cellular_component^nucleus`GO:0003677^molecular_function^DNA binding`GO:0046872^molecular_function^metal ion binding`GO:0008270^molecular_function^zinc ion binding`GO:0006355^biological_process^regulation of transcription, DNA-dependent`GO:0006351^biological_process^transcription, DNA-dependent	.
comp10552_c0_seq1	-3.04157	-1.20859	0.183669	1	3.32193	2.32193	1	3.58496	comp10552_c0	.	.	.	.	.	.	.	.	.	.	.
comp10554_c0_seq1	0.597033	6.38872	0.693984	1	9.24555	12.1053	10.66	10.8329	comp10554_c0	sp|P55795|HNRH2_HUMAN^P55795^Q:407-3,H:9-142^65.1852%ID^E:-46.79^RecName: Full=Heterogeneous nuclear ribonucleoprotein H2;^Eukaryota; Metazoa; Chordata; Craniata; Vertebrata; Euteleostomi; Mammalia; Eutheria; Euarchontoglires; Primates; Haplorrhini; Catarrhini; Hominidae; Homo	.	m.4331	3-413[-]	sp|Q5RD26|HNRH2_PONAB^Q5RD26^Q:3-137,H:9-142^65.1852%ID^E:-47.1^RecName: Full=Heterogeneous nuclear ribonucleoprotein H2;^Eukaryota; Metazoa; Chordata; Craniata; Vertebrata; Euteleostomi; Mammalia; Eutheria; Euarchontoglires; Primates; Haplorrhini; Catarrhini; Hominidae; Pongo	PF14259.1^RRM_6^RNA recognition motif (a.k.a. RRM, RBD, or RNP domain)^8-78^E:6.4e-14`PF00076.17^RRM_1^RNA recognition motif. (a.k.a. RRM, RBD, or RNP domain)^9-77^E:1.1e-09	.	.	.	GO:0015629^cellular_component^actin cytoskeleton`GO:0005737^cellular_component^cytoplasm`GO:0005654^cellular_component^nucleoplasm`GO:0030529^cellular_component^ribonucleoprotein complex`GO:0000166^molecular_function^nucleotide binding`GO:0003723^molecular_function^RNA binding
comp10554_c0_seq2	0.33883	4.13173	0.842121	1	7.65105	8.73471	8.80735	8.77479	comp10554_c0	sp|Q5E9J1|HNRPF_BOVIN^Q5E9J1^Q:221-3,H:74-142^65.7534%ID^E:-19.39^RecName: Full=Heterogeneous nuclear ribonucleoprotein F;^Eukaryota; Metazoa; Chordata; Craniata; Vertebrata; Euteleostomi; Mammalia; Eutheria; Laurasiatheria; Cetartiodactyla; Ruminantia; Pecora; Bovidae; Bovinae; Bos	.	.	.	.	.	.	.	.	GO:0005654^cellular_component^nucleoplasm`GO:0005681^cellular_component^spliceosomal complex`GO:0000166^molecular_function^nucleotide binding`GO:0003727^molecular_function^single-stranded RNA binding`GO:0006397^biological_process^mRNA processing`GO:0043484^biological_process^regulation of RNA splicing`GO:0008380^biological_process^RNA splicing	.
comp10556_c0_seq1	0.486037	-1.52111	1	1	1	3.45943	2.32193	2.58496	comp10556_c0	.	.	.	.	.	.	.	.	.	.	.
comp10557_c0_seq1	0.717353	-1.74477	1	1	0	3.70044	1.58496	1.58496	comp10557_c0	.	.	.	.	.	.	.	.	.	.	.
comp10558_c0_seq1	0.394675	-1.73394	1	1	1.58496	2.58496	2.80735	1.58496	comp10558_c0	.	.	.	.	.	.	.	.	.	.	.
comp10560_c0_seq1	-0.803369	-0.823765	0.757831	1	2.80735	4.45943	2.80735	3	comp10560_c0	.	.	.	.	.	.	.	.	.	.	.
comp10561_c0_seq1	-0.649929	3.17084	0.731765	1	6.61471	9.04166	6.78136	7.31288	comp10561_c0	sp|O88566|AXIN2_MOUSE^O88566^Q:194-991,H:34-302^76.9517%ID^E:-245.841^RecName: Full=Axin-2;^Eukaryota; Metazoa; Chordata; Craniata; Vertebrata; Euteleostomi; Mammalia; Eutheria; Euarchontoglires; Glires; Rodentia; Sciurognathi; Muroidea; Muridae; Murinae; Mus; Mus	.	m.4334	2-2302[+]	sp|O88566|AXIN2_MOUSE^O88566^Q:30-761,H:1-749^67.6862%ID^E:-282.89^RecName: Full=Axin-2;^Eukaryota; Metazoa; Chordata; Craniata; Vertebrata; Euteleostomi; Mammalia; Eutheria; Euarchontoglires; Glires; Rodentia; Sciurognathi; Muroidea; Muridae; Murinae; Mus; Mus	PF00615.14^RGS^Regulator of G protein signaling domain^110-228^E:9.4e-26`PF08833.5^Axin_b-cat_bind^Axin beta-catenin binding domain^463-499^E:1.8e-17	.	.	.	GO:0030877^cellular_component^beta-catenin destruction complex`GO:0005938^cellular_component^cell cortex`GO:0005813^cellular_component^centrosome`GO:0016023^cellular_component^cytoplasmic membrane-bounded vesicle`GO:0005881^cellular_component^cytoplasmic microtubule`GO:0005634^cellular_component^nucleus`GO:0005886^cellular_component^plasma membrane`GO:0014069^cellular_component^postsynaptic densi…
comp10561_c0_seq2	1.42548	1.32747	0.503001	1	4	5.90689	6.24793	6.02237	comp10561_c0	sp|O88566|AXIN2_MOUSE^O88566^Q:89-157,H:1-23^78.2609%ID^E:-243.749^RecName: Full=Axin-2;^Eukaryota; Metazoa; Chordata; Craniata; Vertebrata; Euteleostomi; Mammalia; Eutheria; Euarchontoglires; Glires; Rodentia; Sciurognathi; Muroidea; Muridae; Murinae; Mus; Mus	.	m.4337	2-2308[+]	sp|O88566|AXIN2_MOUSE^O88566^Q:30-758,H:1-746^67.4232%ID^E:-280.8^RecName: Full=Axin-2;^Eukaryota; Metazoa; Chordata; Craniata; Vertebrata; Euteleostomi; Mammalia; Eutheria; Euarchontoglires; Glires; Rodentia; Sciurognathi; Muroidea; Muridae; Murinae; Mus; Mus	PF00615.14^RGS^Regulator of G protein signaling domain^110-228^E:9.5e-26`PF08833.5^Axin_b-cat_bind^Axin beta-catenin binding domain^463-499^E:1.8e-17	.	.	.	GO:0030877^cellular_component^beta-catenin destruction complex`GO:0005938^cellular_component^cell cortex`GO:0005813^cellular_component^centrosome`GO:0016023^cellular_component^cytoplasmic membrane-bounded vesicle`GO:0005881^cellular_component^cytoplasmic microtubule`GO:0005634^cellular_component^nucleus`GO:0005886^cellular_component^plasma membrane`GO:0014069^cellular_component^postsynaptic densi…
comp10562_c0_seq1	0.181262	0.529334	0.964414	1	3.45943	6.12928	4.45943	4.80735	comp10562_c0	.	.	.	.	.	.	.	.	.	.	.
comp10563_c0_seq1	-0.136668	-1.09602	1	1	2.32193	4.08746	3	2.32193	comp10563_c0	.	.	.	.	.	.	.	.	.	.	.
comp10564_c0_seq1	4.30815	-1.82964	0.631345	1	-Inf	4	1.58496	-Inf	comp10564_c0	.	.	.	.	.	.	.	.	.	.	.
comp10565_c0_seq1	0.297465	1.74495	0.89429	1	5.16993	6.55459	6.2854	6.35755	comp10565_c0	sp|Q9P2D0|IBTK_HUMAN^Q9P2D0^Q:2-1282,H:243-668^69.0867%ID^E:-175.94^RecName: Full=Inhibitor of Bruton tyrosine kinase;^Eukaryota; Metazoa; Chordata; Craniata; Vertebrata; Euteleostomi; Mammalia; Eutheria; Euarchontoglires; Primates; Haplorrhini; Catarrhini; Hominidae; Homo	.	m.4340	2-1285[+]	sp|Q9P2D0|IBTK_HUMAN^Q9P2D0^Q:1-427,H:243-668^69.0867%ID^E:-175.94^RecName: Full=Inhibitor of Bruton tyrosine kinase;^Eukaryota; Metazoa; Chordata; Craniata; Vertebrata; Euteleostomi; Mammalia; Eutheria; Euarchontoglires; Primates; Haplorrhini; Catarrhini; Hominidae; Homo	PF00415.13^RCC1^Regulator of chromosome condensation (RCC1) repeat^5-56^E:2.2e-11`PF00651.26^BTB^BTB/POZ domain^312-401^E:2.4e-16	.	.	COG5184^Alpha-tubulin suppressor and related RCC1 domain-containing proteins	GO:0005737^cellular_component^cytoplasm`GO:0016020^cellular_component^membrane`GO:0005634^cellular_component^nucleus`GO:0019901^molecular_function^protein kinase binding`GO:0030292^molecular_function^protein tyrosine kinase inhibitor activity`GO:0051209^biological_process^release of sequestered calcium ion into cytosol
comp10566_c0_seq1	0.868414	-0.902397	0.69783	1	2	3.58496	3.70044	3.45943	comp10566_c0	.	.	.	.	.	.	.	.	.	.	.
comp10569_c0_seq1	1.14729	-1.24227	0.761525	1	1	3.80735	3	2.80735	comp10569_c0	.	.	.	.	.	.	.	.	.	.	.
comp10570_c0_seq1	-0.83868	9.23023	0.676542	1	13.1331	14.7402	13.1118	13.346	comp10570_c0	sp|P62902|RL31_RAT^P62902^Q:417-58,H:6-125^91.6667%ID^E:-56.92^RecName: Full=60S ribosomal protein L31;^Eukaryota; Metazoa; Chordata; Craniata; Vertebrata; Euteleostomi; Mammalia; Eutheria; Euarchontoglires; Glires; Rodentia; Sciurognathi; Muroidea; Muridae; Murinae; Rattus	.	m.4341	55-477[-]	sp|P62902|RL31_RAT^P62902^Q:16-140,H:1-125^94.4%ID^E:-63.56^RecName: Full=60S ribosomal protein L31;^Eukaryota; Metazoa; Chordata; Craniata; Vertebrata; Euteleostomi; Mammalia; Eutheria; Euarchontoglires; Glires; Rodentia; Sciurognathi; Muroidea; Muridae; Murinae; Rattus	PF01198.14^Ribosomal_L31e^Ribosomal protein L31e^33-116^E:2.2e-38	.	.	COG2097^Ribosomal protein L31E	GO:0005840^cellular_component^ribosome`GO:0003735^molecular_function^structural constituent of ribosome`GO:0006412^biological_process^translation
comp10571_c0_seq1	-0.521499	-1.14347	0.82561	1	3.16993	3.45943	3.45943	0	comp10571_c0	.	.	.	.	.	.	.	.	.	.	.
comp10574_c0_seq1	-0.00976039	-1.15702	1	1	2	3.16993	2.80735	3.58496	comp10574_c0	.	.	.	.	.	.	.	.	.	.	.
comp10575_c0_seq1	0.482752	0.811953	0.834561	1	3.90689	5.42626	5.20945	5.72792	comp10575_c0	sp|Q15329|E2F5_HUMAN^Q15329^Q:554-631,H:240-269^60%ID^E:-84.3599^RecName: Full=Transcription factor E2F5;^Eukaryota; Metazoa; Chordata; Craniata; Vertebrata; Euteleostomi; Mammalia; Eutheria; Euarchontoglires; Primates; Haplorrhini; Catarrhini; Hominidae; Homo	.	m.4342	2-811[+]	sp|Q15329|E2F5_HUMAN^Q15329^Q:1-210,H:56-269^87.3832%ID^E:-101.09^RecName: Full=Transcription factor E2F5;^Eukaryota; Metazoa; Chordata; Craniata; Vertebrata; Euteleostomi; Mammalia; Eutheria; Euarchontoglires; Primates; Haplorrhini; Catarrhini; Hominidae; Homo	PF02319.15^E2F_TDP^E2F/DP family winged-helix DNA-binding domain^1-61^E:2.2e-22	.	.	.	GO:0005654^cellular_component^nucleoplasm`GO:0005667^cellular_component^transcription factor complex`GO:0003677^molecular_function^DNA binding`GO:0003700^molecular_function^sequence-specific DNA binding transcription factor activity`GO:0000080^biological_process^G1 phase of mitotic cell cycle`GO:0045944^biological_process^positive regulation of transcription from RNA polymerase II promoter`GO:000…
comp10577_c0_seq1	0.583298	-1.6032	0.891647	1	1.58496	1.58496	3	2.80735	comp10577_c0	.	.	.	.	.	.	.	.	.	.	.
comp10578_c0_seq1	2.65234	-1.31141	0.288151	1	1	-Inf	4.52356	1	comp10578_c0	.	.	.	.	.	.	.	.	.	.	.
comp10579_c0_seq1	0.486037	-1.44283	1	1	1	4.24793	2.32193	0	comp10579_c0	.	.	.	.	.	.	.	.	.	.	.
comp1058_c0_seq1	5.01568	-1.69806	0.337597	1	-Inf	3.70044	2.32193	1.58496	comp1058_c0	.	.	.	.	.	.	.	.	.	.	.
comp10580_c0_seq1	1.09484	-0.302542	0.671444	1	2.32193	4.80735	4.24793	3.90689	comp10580_c0	.	.	.	.	.	.	.	.	.	.	.
comp10581_c0_seq1	2.25293	-1.3777	0.366186	1	0	3.16993	3.16993	3	comp10581_c0	.	.	.	.	.	.	.	.	.	.	.
comp10582_c0_seq1	-1.10874	-1.64437	0.678097	1	2.32193	3.32193	2	1	comp10582_c0	.	.	.	.	.	.	.	.	.	.	.
comp10584_c0_seq1	0.336116	1.73158	0.878645	1	4.9542	6.84549	6.10852	6.35755	comp10584_c0	.	.	.	.	.	.	.	.	.	.	.
comp10585_c0_seq1	4.30815	-1.6818	0.630441	1	-Inf	3.45943	1.58496	2.80735	comp10585_c0	.	.	.	.	.	.	.	.	.	.	.
comp10586_c0_seq1	5.21065	0.847207	0.0394494	0.700158	0	5.12928	6.14975	5.58496	comp10586_c0	.	.	.	.	.	.	.	.	.	.	.
comp10586_c0_seq2	0.583298	-1.75041	0.892096	1	1.58496	3	3	-Inf	comp10586_c0	.	.	.	.	.	.	.	.	.	.	.
comp10587_c0_seq1	-1.76421	-1.32366	0.469831	1	2.58496	2.58496	1.58496	3.58496	comp10587_c0	sp|P0DKB5|TPBGL_HUMAN^P0DKB5^Q:1-54,H:349-366^88.8889%ID^E:-2.1^RecName: Full=Trophoblast glycoprotein-like;^Eukaryota; Metazoa; Chordata; Craniata; Vertebrata; Euteleostomi; Mammalia; Eutheria; Euarchontoglires; Primates; Haplorrhini; Catarrhini; Hominidae; Homo	.	.	.	.	.	.	.	.	GO:0016021^cellular_component^integral to membrane	.
comp10587_c0_seq2	-3.93877	-1.04619	0.18282	1	3.32193	3.16993	0	3.80735	comp10587_c0	.	.	.	.	.	.	.	.	.	.	.
comp10588_c0_seq1	0.630582	-1.37504	0.827898	1	2	2.32193	3.45943	2.58496	comp10588_c0	.	.	.	.	.	.	.	.	.	.	.
comp10590_c0_seq1	1.17781	1.42029	0.590421	1	3.90689	6.61471	5.90689	6.14975	comp10590_c0	.	.	.	.	.	.	.	.	.	.	.
comp10592_c0_seq1	0.583298	-1.1532	0.890642	1	1.58496	3.70044	3	3.16993	comp10592_c0	.	.	.	.	.	.	.	.	.	.	.
comp10593_c0_seq1	-1.73893	-1.50593	0.507626	1	2	4.08746	1	1	comp10593_c0	.	.	.	.	.	.	.	.	.	.	.
comp10594_c0_seq1	1.94251	-0.793181	0.450009	1	1	4.08746	3.80735	3.58496	comp10594_c0	.	.	.	.	.	.	.	.	.	.	.
comp10596_c0_seq1	-0.610864	10.0305	0.78073	1	13.9712	14.9838	14.1777	14.5124	comp10596_c0	sp|Q5ZJ56|RL7_CHICK^Q5ZJ56^Q:836-744,H:1-31^61.2903%ID^E:-98.7688^RecName: Full=60S ribosomal protein L7;^Eukaryota; Metazoa; Chordata; Craniata; Vertebrata; Euteleostomi; Archosauria; Dinosauria; Saurischia; Theropoda; Coelurosauria; Aves; Neognathae; Galliformes; Phasianidae; Phasianinae; Gallus	.	m.4345	96-893[-]	sp|Q5ZJ56|RL7_CHICK^Q5ZJ56^Q:20-265,H:1-246^82.5203%ID^E:-114.09^RecName: Full=60S ribosomal protein L7;^Eukaryota; Metazoa; Chordata; Craniata; Vertebrata; Euteleostomi; Archosauria; Dinosauria; Saurischia; Theropoda; Coelurosauria; Aves; Neognathae; Galliformes; Phasianidae; Phasianinae; Gallus	PF08079.7^Ribosomal_L30_N^Ribosomal L30 N-terminal domain^34-104^E:1.2e-25`PF00327.15^Ribosomal_L30^Ribosomal protein L30p/L7e^106-157^E:9.5e-22	.	.	COG1841^Ribosomal protein L30/L7E	GO:0022625^cellular_component^cytosolic large ribosomal subunit`GO:0003677^molecular_function^DNA binding`GO:0003729^molecular_function^mRNA binding`GO:0042273^biological_process^ribosomal large subunit biogenesis`GO:0006364^biological_process^rRNA processing
comp10598_c0_seq1	-7.17624	-1.81894	0.0627593	0.877406	3.70044	1.58496	-Inf	-Inf	comp10598_c0	.	.	.	.	.	.	.	.	.	.	.
comp106_c0_seq1	-0.79321	-1.65586	0.868687	1	2	2	2	3	comp106_c0	.	.	.	.	.	.	.	.	.	.	.
comp10600_c0_seq1	-10.3857	2.21202	0.00443506	0.39457	6.91886	8.26679	-Inf	-Inf	comp10600_c0	.	.	m.4347	1-510[-]	sp|Q6CDX0|SMI1_YARLI^Q6CDX0^Q:17-169,H:522-684^25.7669%ID^E:-5.82^RecName: Full=KNR4/SMI1 homolog;^Eukaryota; Fungi; Dikarya; Ascomycota; Saccharomycotina; Saccharomycetes; Saccharomycetales; Dipodascaceae; Yarrowia	.	.	.	COG4282^Protein involved in beta-1,3-glucan synthesis	GO:0042546^biological_process^cell wall biogenesis
comp10601_c0_seq1	-5.19424	-0.992209	0.0580967	0.845808	4.58496	3	0	-Inf	comp10601_c0	.	.	m.4349	2-307[+]	sp|Q8WZ42|TITIN_HUMAN^Q8WZ42^Q:1-101,H:1808-1907^68.3168%ID^E:-32.84^RecName: Full=Titin;^Eukaryota; Metazoa; Chordata; Craniata; Vertebrata; Euteleostomi; Mammalia; Eutheria; Euarchontoglires; Primates; Haplorrhini; Catarrhini; Hominidae; Homo	PF02818.10^PPAK^PPAK motif^60-87^E:9.2e-07	.	.	.	GO:0000794^cellular_component^condensed nuclear chromosome`GO:0005829^cellular_component^cytosol`GO:0005576^cellular_component^extracellular region`GO:0005794^cellular_component^Golgi apparatus`GO:0031430^cellular_component^M band`GO:0005865^cellular_component^striated muscle thin filament`GO:0030018^cellular_component^Z disc`GO:0051015^molecular_function^actin filament binding`GO:0042805^molecul…
comp10603_c0_seq1	6.12865	-0.936195	0.152882	1	-Inf	4.85798	3.45943	1.58496	comp10603_c0	.	.	.	.	.	.	.	.	.	.	.
comp10604_c0_seq1	-7.38136	-1.59317	0.0494799	0.781453	3.90689	2.32193	-Inf	-Inf	comp10604_c0	.	.	.	.	.	.	.	.	.	.	.
comp10606_c0_seq1	0.178862	-1.67351	1	1	2	2.58496	3	1	comp10606_c0	.	.	.	.	.	.	.	.	.	.	.
comp10607_c0_seq1	-1.98353	-1.67687	0.423134	1	2.80735	3.16993	1.58496	0	comp10607_c0	.	.	.	.	.	.	.	.	.	.	.
comp10609_c0_seq1	2.25293	-1.21259	0.364874	1	0	4.32193	3.16993	1.58496	comp10609_c0	sp|Q2QL89|MET_MICMU^Q2QL89^Q:360-1,H:853-972^65%ID^E:-38.98^RecName: Full=Hepatocyte growth factor receptor;^Eukaryota; Metazoa; Chordata; Craniata; Vertebrata; Euteleostomi; Mammalia; Eutheria; Euarchontoglires; Primates; Strepsirrhini; Lemuriformes; Cheirogaleidae; Microcebus	.	m.4351	1-360[-]	sp|Q2IBG7|MET_EULMM^Q2IBG7^Q:1-120,H:853-972^65.8333%ID^E:-40.95^RecName: Full=Hepatocyte growth factor receptor;^Eukaryota; Metazoa; Chordata; Craniata; Vertebrata; Euteleostomi; Mammalia; Eutheria; Euarchontoglires; Primates; Strepsirrhini; Lemuriformes; Lemuridae; Eulemur	.	.	ExpAA=22.99^PredHel=1^Topology=o82-104i	.	GO:0016021^cellular_component^integral to membrane`GO:0005524^molecular_function^ATP binding`GO:0004714^molecular_function^transmembrane receptor protein tyrosine kinase activity`GO:0007275^biological_process^multicellular organismal development`GO:0007169^biological_process^transmembrane receptor protein tyrosine kinase signaling pathway
comp10611_c0_seq1	-1.73893	-1.54564	0.50799	1	2	4	1	1	comp10611_c0	.	.	.	.	.	.	.	.	.	.	.
comp10612_c0_seq1	-1.81797	8.07894	0.310935	1	12.6214	13.2988	11.6207	11.5372	comp10612_c0	sp|Q32LG3|MDHM_BOVIN^Q32LG3^Q:1189-179,H:1-338^86.3905%ID^E:-163.52^RecName: Full=Malate dehydrogenase, mitochondrial;^Eukaryota; Metazoa; Chordata; Craniata; Vertebrata; Euteleostomi; Mammalia; Eutheria; Laurasiatheria; Cetartiodactyla; Ruminantia; Pecora; Bovidae; Bovinae; Bos	.	m.4352	176-1321[-]	sp|Q32LG3|MDHM_BOVIN^Q32LG3^Q:45-381,H:1-338^86.3905%ID^E:-163.6^RecName: Full=Malate dehydrogenase, mitochondrial;^Eukaryota; Metazoa; Chordata; Craniata; Vertebrata; Euteleostomi; Mammalia; Eutheria; Laurasiatheria; Cetartiodactyla; Ruminantia; Pecora; Bovidae; Bovinae; Bos	PF00056.18^Ldh_1_N^lactate/malate dehydrogenase, NAD binding domain^68-211^E:1.1e-49`PF01073.14^3Beta_HSD^3-beta hydroxysteroid dehydrogenase/isomerase family^72-180^E:4.8e-05`PF02866.13^Ldh_1_C^lactate/malate dehydrogenase, alpha/beta C-terminal domain^213-377^E:1.1e-50	.	.	COG0039^Malate/lactate dehydrogenases	GO:0005759^cellular_component^mitochondrial matrix`GO:0030060^molecular_function^L-malate dehydrogenase activity`GO:0000166^molecular_function^nucleotide binding`GO:0044262^biological_process^cellular carbohydrate metabolic process`GO:0006475^biological_process^internal protein amino acid acetylation`GO:0006108^biological_process^malate metabolic process`GO:0006099^biological_process^tricarboxyli…
comp10613_c0_seq1	-1.18993	-1.70315	0.708003	1	2	3.32193	1.58496	1.58496	comp10613_c0	.	.	.	.	.	.	.	.	.	.	.
comp10614_c0_seq1	-0.0708814	1.3915	0.985923	1	4.9542	6.55459	5.70044	5.75489	comp10614_c0	.	.	.	.	.	.	.	.	.	.	.
comp10618_c0_seq1	1.03502	-1.0664	0.722483	1	1.58496	4	3.45943	2.58496	comp10618_c0	.	.	.	.	.	.	.	.	.	.	.
comp10619_c0_seq1	1.11407	-2.19591	0.773252	1	0	2.58496	2	0	comp10619_c0	.	.	.	.	.	.	.	.	.	.	.
comp1062_c0_seq1	0.486037	-1.27885	1	1	1	3	2.32193	3.80735	comp1062_c0	.	.	m.71	2-361[-]	.	.	.	.	.	.
comp10620_c0_seq1	4.70486	-1.45595	0.443865	1	-Inf	2.80735	2	3.80735	comp10620_c0	.	.	.	.	.	.	.	.	.	.	.
comp10622_c0_seq1	-0.0779528	-0.948985	1	1	1.58496	5.08746	2.32193	0	comp10622_c0	.	.	.	.	.	.	.	.	.	.	.
comp10623_c0_seq1	-2.31321	-1.36008	0.318634	1	2.58496	3.45943	1	3	comp10623_c0	.	.	.	.	.	.	.	.	.	.	.
comp10624_c0_seq1	0.266414	7.77797	0.874753	1	11.2883	12.6542	12.372	12.3504	comp10624_c0	sp|O15127|SCAM2_HUMAN^O15127^Q:6530-6252,H:123-215^76.3441%ID^E:-82.2355^RecName: Full=Secretory carrier-associated membrane protein 2;^Eukaryota; Metazoa; Chordata; Craniata; Vertebrata; Euteleostomi; Mammalia; Eutheria; Euarchontoglires; Primates; Haplorrhini; Catarrhini; Hominidae; Homo	.	m.4353	5898-6896[-]	sp|O15127|SCAM2_HUMAN^O15127^Q:1-332,H:1-329^68.3432%ID^E:-130.99^RecName: Full=Secretory carrier-associated membrane protein 2;^Eukaryota; Metazoa; Chordata; Craniata; Vertebrata; Euteleostomi; Mammalia; Eutheria; Euarchontoglires; Primates; Haplorrhini; Catarrhini; Hominidae; Homo	PF04144.8^SCAMP^SCAMP family^116-293^E:1.9e-78	.	ExpAA=92.44^PredHel=4^Topology=i154-176o181-203i216-238o260-282i	.	GO:0005794^cellular_component^Golgi apparatus`GO:0016021^cellular_component^integral to membrane`GO:0005634^cellular_component^nucleus`GO:0055038^cellular_component^recycling endosome membrane`GO:0032588^cellular_component^trans-Golgi network membrane`GO:0006892^biological_process^post-Golgi vesicle-mediated transport`GO:0015031^biological_process^protein transport
comp10626_c0_seq1	-2.47801	1.22274	0.257442	1	5.67243	7.06609	4	3.32193	comp10626_c0	.	.	.	.	.	.	.	.	.	.	.
comp10629_c0_seq1	-7.72058	-1.57967	0.0367356	0.679141	4.24793	-Inf	-Inf	-Inf	comp10629_c0	.	.	.	.	.	.	.	.	.	.	.
comp1063_c0_seq1	-2.05446	-2.06175	0.374703	1	2.32193	1	1	2	comp1063_c0	sp|Q02930|CREB5_HUMAN^Q02930^Q:241-2,H:150-229^88.75%ID^E:-35.74^RecName: Full=Cyclic AMP-responsive element-binding protein 5;^Eukaryota; Metazoa; Chordata; Craniata; Vertebrata; Euteleostomi; Mammalia; Eutheria; Euarchontoglires; Primates; Haplorrhini; Catarrhini; Hominidae; Homo	.	.	.	.	.	.	.	.	GO:0005634^cellular_component^nucleus`GO:0046872^molecular_function^metal ion binding`GO:0001077^molecular_function^RNA polymerase II core promoter proximal region sequence-specific DNA binding transcription factor activity involved in positive regulation of transcription`GO:0043565^molecular_function^sequence-specific DNA binding`GO:0003700^molecular_function^sequence-specific DNA binding transc…	.
comp10631_c0_seq1	-1.36749	-1.48166	0.606016	1	2.58496	3.16993	2	2.32193	comp10631_c0	sp|Q9TUX8|NOS3_CANFA^Q9TUX8^Q:96-1,H:69-100^53.125%ID^E:-3.61^RecName: Full=Nitric oxide synthase, endothelial;^Eukaryota; Metazoa; Chordata; Craniata; Vertebrata; Euteleostomi; Mammalia; Eutheria; Laurasiatheria; Carnivora; Caniformia; Canidae; Canis	.	.	.	.	.	.	.	COG4362^Nitric oxide synthase, oxygenase domain	GO:0005901^cellular_component^caveola`GO:0005856^cellular_component^cytoskeleton`GO:0005794^cellular_component^Golgi apparatus`GO:0050660^molecular_function^flavin adenine dinucleotide binding`GO:0010181^molecular_function^FMN binding`GO:0020037^molecular_function^heme binding`GO:0005506^molecular_function^iron ion binding`GO:0050661^molecular_function^NADP binding`GO:0004517^molecular_function^n…	.
comp10632_c0_seq1	2.25293	-0.874045	0.363583	1	0	3.90689	3.16993	4.08746	comp10632_c0	.	.	.	.	.	.	.	.	.	.	.
comp10633_c0_seq1	1.59901	-1.28318	0.604505	1	1	3.80735	3.45943	1.58496	comp10633_c0	.	.	.	.	.	.	.	.	.	.	.
comp10634_c0_seq1	-0.548184	10.9051	0.819977	1	14.7897	15.4547	15.0588	15.6975	comp10634_c0	sp|O03847|NU1M_LATCH^O03847^Q:1620-1910,H:1-97^73.1959%ID^E:-101.118^RecName: Full=NADH-ubiquinone oxidoreductase chain 1;^Eukaryota; Metazoa; Chordata; Craniata; Vertebrata; Euteleostomi; Coelacanthiformes; Coelacanthidae; Latimeria	.	.	.	.	.	.	.	.	GO:0016021^cellular_component^integral to membrane`GO:0005743^cellular_component^mitochondrial inner membrane`GO:0070469^cellular_component^respiratory chain`GO:0008137^molecular_function^NADH dehydrogenase (ubiquinone) activity`GO:0022900^biological_process^electron transport chain	.
comp10635_c0_seq1	-1.37889	-1.49873	0.513535	1	3.16993	0	2.58496	2.58496	comp10635_c0	.	.	.	.	.	.	.	.	.	.	.
comp10636_c0_seq1	1.02624	0.953373	0.631346	1	3.90689	6.65821	5.75489	3.58496	comp10636_c0	.	.	.	.	.	.	.	.	.	.	.
comp10638_c0_seq1	0.394675	-1.40906	1	1	1.58496	3.16993	2.80735	2.80735	comp10638_c0	.	.	.	.	.	.	.	.	.	.	.
comp10639_c0_seq1	5.27127	-1.75985	0.268314	1	-Inf	2.80735	2.58496	2.58496	comp10639_c0	.	.	.	.	.	.	.	.	.	.	.
comp1064_c0_seq1	-0.136668	-1.54798	1	1	2.32193	2	3	2.32193	comp1064_c0	.	.	.	.	.	.	.	.	.	.	.
comp10640_c0_seq1	1.17232	0.327317	0.585073	1	2.80735	5.49185	4.80735	4.85798	comp10640_c0	sp|Q8TD17|ZN398_HUMAN^Q8TD17^Q:779-946,H:513-567^33.9286%ID^E:-2.88^RecName: Full=Zinc finger protein 398;^Eukaryota; Metazoa; Chordata; Craniata; Vertebrata; Euteleostomi; Mammalia; Eutheria; Euarchontoglires; Primates; Haplorrhini; Catarrhini; Hominidae; Homo	.	m.4361	2-952[+]	sp|Q8TD17|ZN398_HUMAN^Q8TD17^Q:260-315,H:513-567^33.9286%ID^E:-2.89^RecName: Full=Zinc finger protein 398;^Eukaryota; Metazoa; Chordata; Craniata; Vertebrata; Euteleostomi; Mammalia; Eutheria; Euarchontoglires; Primates; Haplorrhini; Catarrhini; Hominidae; Homo	PF00096.21^zf-C2H2^Zinc finger, C2H2 type^287-309^E:0.00057	.	.	COG5048^FOG: Zn-finger	GO:0005634^cellular_component^nucleus`GO:0003677^molecular_function^DNA binding`GO:0046872^molecular_function^metal ion binding`GO:0008270^molecular_function^zinc ion binding`GO:0045893^biological_process^positive regulation of transcription, DNA-dependent`GO:0006351^biological_process^transcription, DNA-dependent
comp10640_c0_seq2	1.28536	-0.155988	0.548071	1	2.58496	4.75489	4.70044	3.90689	comp10640_c0	sp|Q8TD17|ZN398_HUMAN^Q8TD17^Q:668-835,H:513-567^33.9286%ID^E:-2.97^RecName: Full=Zinc finger protein 398;^Eukaryota; Metazoa; Chordata; Craniata; Vertebrata; Euteleostomi; Mammalia; Eutheria; Euarchontoglires; Primates; Haplorrhini; Catarrhini; Hominidae; Homo	.	m.4363	2-841[+]	sp|Q8TD17|ZN398_HUMAN^Q8TD17^Q:223-278,H:513-567^33.9286%ID^E:-2.97^RecName: Full=Zinc finger protein 398;^Eukaryota; Metazoa; Chordata; Craniata; Vertebrata; Euteleostomi; Mammalia; Eutheria; Euarchontoglires; Primates; Haplorrhini; Catarrhini; Hominidae; Homo	PF00096.21^zf-C2H2^Zinc finger, C2H2 type^250-272^E:0.00048`PF13894.1^zf-C2H2_4^C2H2-type zinc finger^250-272^E:0.27	.	.	COG5048^FOG: Zn-finger	GO:0005634^cellular_component^nucleus`GO:0003677^molecular_function^DNA binding`GO:0046872^molecular_function^metal ion binding`GO:0008270^molecular_function^zinc ion binding`GO:0045893^biological_process^positive regulation of transcription, DNA-dependent`GO:0006351^biological_process^transcription, DNA-dependent
comp10642_c0_seq1	0.258289	-0.57817	0.954458	1	3.16993	3.32193	4.24793	3.58496	comp10642_c0	.	.	.	.	.	.	.	.	.	.	.
comp10643_c0_seq1	-7.93115	-1.40502	0.0294359	0.614621	4.45943	-Inf	-Inf	-Inf	comp10643_c0	.	.	.	.	.	.	.	.	.	.	.
comp10644_c0_seq1	5.99321	-1.1048	0.153337	1	-Inf	3.80735	3.32193	3.45943	comp10644_c0	.	.	.	.	.	.	.	.	.	.	.
comp10645_c0_seq1	-0.945513	6.58608	0.538307	1	10.544	11.9012	10.4157	10.9218	comp10645_c0	sp|P17665|COX7C_MOUSE^P17665^Q:85-273,H:1-63^84.127%ID^E:-22.76^RecName: Full=Cytochrome c oxidase subunit 7C, mitochondrial;^Eukaryota; Metazoa; Chordata; Craniata; Vertebrata; Euteleostomi; Mammalia; Eutheria; Euarchontoglires; Glires; Rodentia; Sciurognathi; Muroidea; Muridae; Murinae; Mus; Mus	.	.	.	.	.	.	.	NOG241420^Calcineurin-Like phosphoesterase	GO:0016021^cellular_component^integral to membrane`GO:0005743^cellular_component^mitochondrial inner membrane`GO:0004129^molecular_function^cytochrome-c oxidase activity	.
comp10646_c0_seq1	-0.675926	0.160702	0.760749	1	4.32193	5.16993	4.45943	3.70044	comp10646_c0	.	.	.	.	.	.	.	.	.	.	.
comp10648_c0_seq1	-0.32199	7.41029	0.843234	1	11.0035	12.4724	11.4988	12.1746	comp10648_c0	sp|A1A4Q4|TMA7_BOVIN^A1A4Q4^Q:1095-937,H:11-63^57.8947%ID^E:-4.94^RecName: Full=Translation machinery-associated protein 7;^Eukaryota; Metazoa; Chordata; Craniata; Vertebrata; Euteleostomi; Mammalia; Eutheria; Laurasiatheria; Cetartiodactyla; Ruminantia; Pecora; Bovidae; Bovinae; Bos	.	.	.	.	.	.	.	.	.	.
comp10649_c0_seq1	6.12865	-0.917816	0.152858	1	-Inf	4.9542	3.45943	1	comp10649_c0	.	.	.	.	.	.	.	.	.	.	.
comp10650_c0_seq1	2.23302	9.31585	0.287734	1	10.7322	14.6213	13.7826	14.4324	comp10650_c0	sp|Q8IX01|SUGP2_HUMAN^Q8IX01^Q:2422-2300,H:304-343^41.4634%ID^E:-72.3726^RecName: Full=SURP and G-patch domain-containing protein 2;^Eukaryota; Metazoa; Chordata; Craniata; Vertebrata; Euteleostomi; Mammalia; Eutheria; Euarchontoglires; Primates; Haplorrhini; Catarrhini; Hominidae; Homo	.	m.4371	227-3118[-]	sp|Q8IX01|SUGP2_HUMAN^Q8IX01^Q:233-273,H:304-343^41.4634%ID^E:-77.5497^RecName: Full=SURP and G-patch domain-containing protein 2;^Eukaryota; Metazoa; Chordata; Craniata; Vertebrata; Euteleostomi; Mammalia; Eutheria; Euarchontoglires; Primates; Haplorrhini; Catarrhini; Hominidae; Homo	PF01805.15^Surp^Surp module^579-609^E:2.7e-06`PF01805.15^Surp^Surp module^745-798^E:5.4e-08	.	.	.	GO:0005634^cellular_component^nucleus`GO:0003723^molecular_function^RNA binding`GO:0006397^biological_process^mRNA processing`GO:0008380^biological_process^RNA splicing
comp10651_c0_seq1	-0.605637	-0.267645	0.790332	1	3.70044	4.39232	3.90689	4	comp10651_c0	.	.	.	.	.	.	.	.	.	.	.
comp10651_c1_seq1	-0.64776	13.6128	0.836551	1	17.6173	18.476	17.7869	18.0685	comp10651_c1	sp|Q9ZZM6|COX1_SALSA^Q9ZZM6^Q:3503-2733,H:196-452^85.6031%ID^E:-207.183^RecName: Full=Cytochrome c oxidase subunit 1;^Eukaryota; Metazoa; Chordata; Craniata; Vertebrata; Euteleostomi; Actinopterygii; Neopterygii; Teleostei; Euteleostei; Protacanthopterygii; Salmoniformes; Salmonidae; Salmoninae; Salmo	.	.	.	.	.	.	.	.	GO:0016021^cellular_component^integral to membrane`GO:0005743^cellular_component^mitochondrial inner membrane`GO:0070469^cellular_component^respiratory chain`GO:0004129^molecular_function^cytochrome-c oxidase activity`GO:0009055^molecular_function^electron carrier activity`GO:0020037^molecular_function^heme binding`GO:0005506^molecular_function^iron ion binding`GO:0009060^biological_process^aerob…	.
comp10653_c0_seq1	-2.63613	-1.59783	0.50849	1	2	3.32193	0	2.80735	comp10653_c0	.	.	.	.	.	.	.	.	.	.	.
comp10654_c0_seq1	0.294132	-0.81896	0.935575	1	2.58496	4.32193	3.70044	2.32193	comp10654_c0	.	.	.	.	.	.	.	.	.	.	.
comp10656_c0_seq1	-0.568391	9.41021	0.781147	1	13.2943	14.5563	13.5433	13.7967	comp10656_c0	sp|Q64LC9|RBM4B_RAT^Q64LC9^Q:903-929,H:265-273^66.6667%ID^E:-89.9102^RecName: Full=RNA-binding protein 4B;^Eukaryota; Metazoa; Chordata; Craniata; Vertebrata; Euteleostomi; Mammalia; Eutheria; Euarchontoglires; Glires; Rodentia; Sciurognathi; Muroidea; Muridae; Murinae; Rattus	.	m.4373	90-1163[+]	sp|Q9BDY9|RBM4_RABIT^Q9BDY9^Q:1-356,H:1-358^57.1429%ID^E:-116.33^RecName: Full=RNA-binding protein 4;^Eukaryota; Metazoa; Chordata; Craniata; Vertebrata; Euteleostomi; Mammalia; Eutheria; Euarchontoglires; Glires; Lagomorpha; Leporidae; Oryctolagus	PF00076.17^RRM_1^RNA recognition motif. (a.k.a. RRM, RBD, or RNP domain)^4-65^E:1e-16`PF14259.1^RRM_6^RNA recognition motif (a.k.a. RRM, RBD, or RNP domain)^4-66^E:1.8e-12`PF13893.1^RRM_5^RNA recognition motif. (a.k.a. RRM, RBD, or RNP domain)^19-70^E:2.3e-09`PF14259.1^RRM_6^RNA recognition motif (a.k.a. RRM, RBD, or RNP domain)^80-139^E:1.8e-09`PF00076.17^RRM_1^RNA recognition motif. (a.k.a. RRM…	.	.	.	GO:0010494^cellular_component^cytoplasmic stress granule`GO:0016607^cellular_component^nuclear speck`GO:0005730^cellular_component^nucleolus`GO:0046872^molecular_function^metal ion binding`GO:0035198^molecular_function^miRNA binding`GO:0003730^molecular_function^mRNA 3'-UTR binding`GO:0000166^molecular_function^nucleotide binding`GO:0097158^molecular_function^pre-mRNA intronic pyrimidine-rich bin…
comp10657_c0_seq1	-0.456986	9.81229	0.83083	1	13.6081	15.2235	13.9685	13.9775	comp10657_c0	sp|Q90YQ5|RS18_ICTPU^Q90YQ5^Q:513-121,H:1-131^98.4733%ID^E:-69.3034^RecName: Full=40S ribosomal protein S18;^Eukaryota; Metazoa; Chordata; Craniata; Vertebrata; Euteleostomi; Actinopterygii; Neopterygii; Teleostei; Ostariophysi; Siluriformes; Ictaluridae; Ictalurus	.	m.4376	55-570[-]	sp|Q90YQ5|RS18_ICTPU^Q90YQ5^Q:20-171,H:1-152^98.6842%ID^E:-81.76^RecName: Full=40S ribosomal protein S18;^Eukaryota; Metazoa; Chordata; Craniata; Vertebrata; Euteleostomi; Actinopterygii; Neopterygii; Teleostei; Ostariophysi; Siluriformes; Ictaluridae; Ictalurus	PF00416.17^Ribosomal_S13^Ribosomal protein S13/S18^33-161^E:6.4e-40	.	.	.	GO:0022627^cellular_component^cytosolic small ribosomal subunit`GO:0019843^molecular_function^rRNA binding`GO:0003735^molecular_function^structural constituent of ribosome`GO:0006412^biological_process^translation
comp10658_c0_seq1	-0.919039	8.48513	0.618079	1	12.1712	14.3834	12.0694	12.4181	comp10658_c0	sp|Q5R8K6|RL35A_PONAB^Q5R8K6^Q:378-49,H:1-110^98.1818%ID^E:-58.17^RecName: Full=60S ribosomal protein L35a;^Eukaryota; Metazoa; Chordata; Craniata; Vertebrata; Euteleostomi; Mammalia; Eutheria; Euarchontoglires; Primates; Haplorrhini; Catarrhini; Hominidae; Pongo	.	m.4378	46-378[-]	sp|Q5R8K6|RL35A_PONAB^Q5R8K6^Q:1-110,H:1-110^98.1818%ID^E:-58.35^RecName: Full=60S ribosomal protein L35a;^Eukaryota; Metazoa; Chordata; Craniata; Vertebrata; Euteleostomi; Mammalia; Eutheria; Euarchontoglires; Primates; Haplorrhini; Catarrhini; Hominidae; Pongo	PF01247.13^Ribosomal_L35Ae^Ribosomal protein L35Ae^5-104^E:8e-44	.	.	.	GO:0022625^cellular_component^cytosolic large ribosomal subunit`GO:0003735^molecular_function^structural constituent of ribosome`GO:0000049^molecular_function^tRNA binding`GO:0042273^biological_process^ribosomal large subunit biogenesis`GO:0006364^biological_process^rRNA processing`GO:0006412^biological_process^translation
comp10660_c0_seq1	0.175216	-1.60337	1	1	1	3.16993	2	2.80735	comp10660_c0	.	.	.	.	.	.	.	.	.	.	.
comp10661_c0_seq1	-7.93115	-1.40502	0.0294359	0.614621	4.45943	-Inf	-Inf	-Inf	comp10661_c0	sp|Q6NZ06|ILF2_DANRE^Q6NZ06^Q:222-1,H:79-152^94.5946%ID^E:-31.79^RecName: Full=Interleukin enhancer-binding factor 2 homolog;^Eukaryota; Metazoa; Chordata; Craniata; Vertebrata; Euteleostomi; Actinopterygii; Neopterygii; Teleostei; Ostariophysi; Cypriniformes; Cyprinidae; Danio	.	.	.	.	.	.	.	.	GO:0005730^cellular_component^nucleolus`GO:0005524^molecular_function^ATP binding`GO:0003677^molecular_function^DNA binding`GO:0003725^molecular_function^double-stranded RNA binding`GO:0016740^molecular_function^transferase activity`GO:0006955^biological_process^immune response`GO:0045893^biological_process^positive regulation of transcription, DNA-dependent`GO:0006351^biological_process^transcri…	.
comp10662_c0_seq1	1.03502	-1.35209	0.723669	1	1.58496	2.80735	3.45943	2.58496	comp10662_c0	.	.	.	.	.	.	.	.	.	.	.
comp10663_c0_seq1	-2.05446	-1.58039	0.368279	1	2.32193	1	1	3.58496	comp10663_c0	.	.	.	.	.	.	.	.	.	.	.
comp10664_c0_seq1	-0.353368	-0.495354	0.87801	1	3	4.08746	3.45943	4.24793	comp10664_c0	.	.	.	.	.	.	.	.	.	.	.
comp10665_c0_seq1	0.438864	-0.337416	0.928706	1	2.32193	4.75489	3.58496	4.39232	comp10665_c0	.	.	.	.	.	.	.	.	.	.	.
comp10666_c0_seq1	-9.11226	-0.285664	0.0095617	0.438971	5.64386	-Inf	-Inf	-Inf	comp10666_c0	.	.	.	.	.	.	.	.	.	.	.
comp10667_c0_seq1	-0.482389	-1.24362	1	1	2	4	2.32193	2.58496	comp10667_c0	.	.	.	.	.	.	.	.	.	.	.
comp10668_c0_seq1	1.42489	-2.10596	0.621188	1	0	2	2.32193	1.58496	comp10668_c0	.	.	.	.	.	.	.	.	.	.	.
comp10669_c0_seq1	-6.37563	10.3327	0.0214563	0.542204	15.8135	13.8582	10.255	5.32193	comp10669_c0	sp|P02605|MLE3_CHICK^P02605^Q:188-637,H:1-150^86%ID^E:-68.77^RecName: Full=Myosin light chain 3, skeletal muscle isoform;^Eukaryota; Metazoa; Chordata; Craniata; Vertebrata; Euteleostomi; Archosauria; Dinosauria; Saurischia; Theropoda; Coelurosauria; Aves; Neognathae; Galliformes; Phasianidae; Phasianinae; Gallus	.	m.4381	188-640[+]	sp|P02605|MLE3_CHICK^P02605^Q:1-150,H:1-150^86%ID^E:-69.5^RecName: Full=Myosin light chain 3, skeletal muscle isoform;^Eukaryota; Metazoa; Chordata; Craniata; Vertebrata; Euteleostomi; Archosauria; Dinosauria; Saurischia; Theropoda; Coelurosauria; Aves; Neognathae; Galliformes; Phasianidae; Phasianinae; Gallus	PF13405.1^EF_hand_4^EF-hand domain^10-39^E:0.0047`PF13499.1^EF_hand_5^EF-hand domain pair^93-145^E:2e-06	.	.	.	GO:0016459^cellular_component^myosin complex`GO:0005509^molecular_function^calcium ion binding
comp10669_c0_seq2	-6.64977	9.8796	0.0129018	0.469297	15.3226	13.8067	9.48985	4	comp10669_c0	sp|P02604|MLE1_CHICK^P02604^Q:284-784,H:26-192^86.2275%ID^E:-77.51^RecName: Full=Myosin light chain 1, skeletal muscle isoform;^Eukaryota; Metazoa; Chordata; Craniata; Vertebrata; Euteleostomi; Archosauria; Dinosauria; Saurischia; Theropoda; Coelurosauria; Aves; Neognathae; Galliformes; Phasianidae; Phasianinae; Gallus	.	m.4383	215-787[+]	sp|P02604|MLE1_CHICK^P02604^Q:1-190,H:1-192^82.8125%ID^E:-84.09^RecName: Full=Myosin light chain 1, skeletal muscle isoform;^Eukaryota; Metazoa; Chordata; Craniata; Vertebrata; Euteleostomi; Archosauria; Dinosauria; Saurischia; Theropoda; Coelurosauria; Aves; Neognathae; Galliformes; Phasianidae; Phasianinae; Gallus	PF13405.1^EF_hand_4^EF-hand domain^50-79^E:0.0068	.	.	COG5126^Ca2+-binding protein (EF-Hand superfamily)	GO:0030016^cellular_component^myofibril`GO:0016459^cellular_component^myosin complex`GO:0005509^molecular_function^calcium ion binding
comp10670_c0_seq1	0.583298	-0.919089	0.890425	1	1.58496	4.58496	3	2.80735	comp10670_c0	.	.	.	.	.	.	.	.	.	.	.
comp10671_c0_seq1	-0.136668	-1.01407	1	1	2.32193	3.32193	3	3.70044	comp10671_c0	.	.	.	.	.	.	.	.	.	.	.
comp10672_c0_seq1	0.0562995	-0.76443	1	1	2.58496	4	3.45943	3.58496	comp10672_c0	.	.	.	.	.	.	.	.	.	.	.
comp10673_c0_seq1	-7.99502	-1.20304	0.0275467	0.603606	4.52356	2	-Inf	-Inf	comp10673_c0	.	.	.	.	.	.	.	.	.	.	.
comp10674_c0_seq1	-1.00345	9.38486	0.624798	1	13.3886	14.9116	13.2024	13.3665	comp10674_c0	sp|P62856|RS26_RAT^P62856^Q:54-359,H:7-108^92.1569%ID^E:-46.41^RecName: Full=40S ribosomal protein S26;^Eukaryota; Metazoa; Chordata; Craniata; Vertebrata; Euteleostomi; Mammalia; Eutheria; Euarchontoglires; Glires; Rodentia; Sciurognathi; Muroidea; Muridae; Murinae; Rattus	.	m.4385	3-470[+]	sp|Q56JV1|RS26_BOVIN^Q56JV1^Q:12-119,H:1-108^95.3704%ID^E:-54.38^RecName: Full=40S ribosomal protein S26;^Eukaryota; Metazoa; Chordata; Craniata; Vertebrata; Euteleostomi; Mammalia; Eutheria; Laurasiatheria; Cetartiodactyla; Ruminantia; Pecora; Bovidae; Bovinae; Bos	PF01283.14^Ribosomal_S26e^Ribosomal protein S26e^12-114^E:1.3e-52	.	.	COG4830^Ribosomal protein S26	GO:0005840^cellular_component^ribosome`GO:0003735^molecular_function^structural constituent of ribosome`GO:0006412^biological_process^translation
comp10676_c0_seq1	-1.58682	-1.72411	0.549439	1	2.80735	3	2	-Inf	comp10676_c0	.	.	.	.	.	.	.	.	.	.	.
comp10677_c0_seq1	1.31408	-1.43788	0.676517	1	1	3.58496	3.16993	1.58496	comp10677_c0	.	.	.	.	.	.	.	.	.	.	.
comp10678_c0_seq1	3.75915	-0.932863	0.627707	1	-Inf	5.45943	1	-Inf	comp10678_c0	sp|Q80RC7|GCNT3_BHV4^Q80RC7^Q:104-511,H:17-150^43.3824%ID^E:-22.75^RecName: Full=Beta-1,3-galactosyl-O-glycosyl-glycoprotein beta-1,6-N-acetylglucosaminyltransferase;^Viruses; dsDNA viruses, no RNA stage; Herpesvirales; Herpesviridae; Gammaherpesvirinae; Rhadinovirus	.	m.4386	2-514[+]	sp|Q80RC7|GCNT3_BHV4^Q80RC7^Q:35-170,H:17-150^43.3824%ID^E:-22.75^RecName: Full=Beta-1,3-galactosyl-O-glycosyl-glycoprotein beta-1,6-N-acetylglucosaminyltransferase;^Viruses; dsDNA viruses, no RNA stage; Herpesvirales; Herpesviridae; Gammaherpesvirinae; Rhadinovirus	.	.	ExpAA=19.01^PredHel=1^Topology=o32-54i	.	GO:0044178^cellular_component^host cell Golgi membrane`GO:0016021^cellular_component^integral to membrane`GO:0003829^molecular_function^beta-1,3-galactosyl-O-glycosyl-glycoprotein beta-1,6-N-acetylglucosaminyltransferase activity`GO:0008109^molecular_function^N-acetyllactosaminide beta-1,6-N-acetylglucosaminyltransferase activity`GO:0006486^biological_process^protein glycosylation
comp10679_c0_seq1	4.30815	-1.38846	0.628938	1	-Inf	3.32193	1.58496	3.80735	comp10679_c0	sp|Q07DZ5|CTTB2_ORNAN^Q07DZ5^Q:9-299,H:1204-1300^78.3505%ID^E:-42.57^RecName: Full=Cortactin-binding protein 2;^Eukaryota; Metazoa; Chordata; Craniata; Vertebrata; Euteleostomi; Mammalia; Monotremata; Ornithorhynchidae; Ornithorhynchus	.	.	.	.	.	.	.	NOG147534^Cortactin-Binding protein 2	.	.
comp10682_c0_seq1	-0.600467	12.4716	0.831368	1	16.4037	17.8198	16.6206	16.5382	comp10682_c0	sp|Q3SYU2|EF2_BOVIN^Q3SYU2^Q:95-2668,H:1-858^94.5221%ID^E:-10000^RecName: Full=Elongation factor 2;^Eukaryota; Metazoa; Chordata; Craniata; Vertebrata; Euteleostomi; Mammalia; Eutheria; Laurasiatheria; Cetartiodactyla; Ruminantia; Pecora; Bovidae; Bovinae; Bos	.	m.4387	95-2671[+]	sp|P13639|EF2_HUMAN^P13639^Q:1-858,H:1-858^95.338%ID^E:-10000^RecName: Full=Elongation factor 2;^Eukaryota; Metazoa; Chordata; Craniata; Vertebrata; Euteleostomi; Mammalia; Eutheria; Euarchontoglires; Primates; Haplorrhini; Catarrhini; Hominidae; Homo	PF00009.22^GTP_EFTU^Elongation factor Tu GTP binding domain^18-261^E:2.6e-60`PF01926.18^MMR_HSR1^50S ribosome-binding GTPase^28-159^E:7.2e-06`PF03144.20^GTP_EFTU_D2^Elongation factor Tu domain 2^410-484^E:3.5e-12`PF03764.13^EFG_IV^Elongation factor G, domain IV^621-737^E:3.4e-37`PF00679.19^EFG_C^Elongation factor G C-terminus^739-825^E:3.2e-21	.	.	COG0480^Translation elongation factors (GTPases)	GO:0005829^cellular_component^cytosol`GO:0005844^cellular_component^polysome`GO:0030529^cellular_component^ribonucleoprotein complex`GO:0005525^molecular_function^GTP binding`GO:0003924^molecular_function^GTPase activity`GO:0003746^molecular_function^translation elongation factor activity`GO:0006414^biological_process^translational elongation
comp10684_c0_seq1	-1.37889	-1.11104	0.510343	1	3.16993	3.58496	2.58496	2.58496	comp10684_c0	sp|Q969F8|KISSR_HUMAN^Q969F8^Q:85-147,H:88-108^61.9048%ID^E:-0.02^RecName: Full=KiSS-1 receptor;^Eukaryota; Metazoa; Chordata; Craniata; Vertebrata; Euteleostomi; Mammalia; Eutheria; Euarchontoglires; Primates; Haplorrhini; Catarrhini; Hominidae; Homo	.	.	.	.	.	.	.	.	GO:0009986^cellular_component^cell surface`GO:0016021^cellular_component^integral to membrane`GO:0005886^cellular_component^plasma membrane`GO:0042923^molecular_function^neuropeptide binding`GO:0008188^molecular_function^neuropeptide receptor activity`GO:0000186^biological_process^activation of MAPKK activity`GO:0050482^biological_process^arachidonic acid secretion`GO:0007610^biological_process^b…	.
comp10684_c0_seq2	0.394675	-1.67127	1	1	1.58496	2.32193	2.80735	2.32193	comp10684_c0	.	.	.	.	.	.	.	.	.	.	.
comp10685_c0_seq1	0.486037	-1.69241	1	1	1	2.80735	2.32193	2.58496	comp10685_c0	.	.	.	.	.	.	.	.	.	.	.
comp10686_c0_seq1	-4.54466	0.242202	0.0535849	0.811234	5.78136	4.52356	2	-Inf	comp10686_c0	.	.	m.4389	2-790[+]	.	.	.	.	.	.
comp10687_c0_seq1	1.68391	0.0307597	0.442911	1	2	4.75489	4.52356	4.9542	comp10687_c0	sp|O94761|RECQ4_HUMAN^O94761^Q:594-340,H:1120-1204^61.1765%ID^E:-26.77^RecName: Full=ATP-dependent DNA helicase Q4;^Eukaryota; Metazoa; Chordata; Craniata; Vertebrata; Euteleostomi; Mammalia; Eutheria; Euarchontoglires; Primates; Haplorrhini; Catarrhini; Hominidae; Homo	.	m.4390	328-807[-]	sp|Q75NR7|RECQ4_MOUSE^Q75NR7^Q:69-156,H:1120-1212^61.2903%ID^E:-27.34^RecName: Full=ATP-dependent DNA helicase Q4;^Eukaryota; Metazoa; Chordata; Craniata; Vertebrata; Euteleostomi; Mammalia; Eutheria; Euarchontoglires; Glires; Rodentia; Sciurognathi; Muroidea; Muridae; Murinae; Mus; Mus	.	.	.	COG0514^Superfamily II DNA helicase	GO:0005737^cellular_component^cytoplasm`GO:0005634^cellular_component^nucleus`GO:0005524^molecular_function^ATP binding`GO:0008026^molecular_function^ATP-dependent helicase activity`GO:0046872^molecular_function^metal ion binding`GO:0003676^molecular_function^nucleic acid binding`GO:0008270^molecular_function^zinc ion binding`GO:0006310^biological_process^DNA recombination`GO:0006260^biological_p…
comp10690_c0_seq1	1.22913	-0.69831	0.568305	1	2.58496	3.16993	4.64386	2.58496	comp10690_c0	.	.	.	.	.	.	.	.	.	.	.
comp10692_c0_seq1	-1.31241	-1.52454	0.56189	1	3.32193	2.32193	2.80735	-Inf	comp10692_c0	.	.	.	.	.	.	.	.	.	.	.
comp10693_c0_seq1	0.912842	0.701173	0.679071	1	3.16993	5.61471	4.90689	5.72792	comp10693_c0	.	.	.	.	.	.	.	.	.	.	.
comp10694_c0_seq1	0.0301205	-0.817968	1	1	2.32193	4.58496	3.16993	2.80735	comp10694_c0	sp|P38898|YH17_YEAST^P38898^Q:206-153,H:9-26^61.1111%ID^E:-0.374115^RecName: Full=Putative uncharacterized protein YHR217C;^Eukaryota; Fungi; Dikarya; Ascomycota; Saccharomycotina; Saccharomycetes; Saccharomycetales; Saccharomycetaceae; Saccharomyces	.	.	.	.	.	.	.	.	.	.
comp10695_c0_seq1	5.66176	9.29857	0.0188084	0.522794	8.17493	15.4967	14.6545	7.56986	comp10695_c0	sp|P43235|CATK_HUMAN^P43235^Q:967-692,H:238-329^77.1739%ID^E:-138.987^RecName: Full=Cathepsin K;^Eukaryota; Metazoa; Chordata; Craniata; Vertebrata; Euteleostomi; Mammalia; Eutheria; Euarchontoglires; Primates; Haplorrhini; Catarrhini; Hominidae; Homo	.	m.4393	689-1789[-]	sp|P43235|CATK_HUMAN^P43235^Q:43-366,H:4-329^74.5399%ID^E:-147.28^RecName: Full=Cathepsin K;^Eukaryota; Metazoa; Chordata; Craniata; Vertebrata; Euteleostomi; Mammalia; Eutheria; Euarchontoglires; Primates; Haplorrhini; Catarrhini; Hominidae; Homo	PF08246.7^Inhibitor_I29^Cathepsin propeptide inhibitor domain (I29)^65-124^E:6.4e-13`PF00112.18^Peptidase_C1^Papain family cysteine protease^152-364^E:6.6e-80	.	.	COG4870^Cysteine protease	GO:0036021^cellular_component^endolysosome lumen`GO:0005615^cellular_component^extracellular space`GO:0004197^molecular_function^cysteine-type endopeptidase activity`GO:0045453^biological_process^bone resorption`GO:0045087^biological_process^innate immune response`GO:0001957^biological_process^intramembranous ossification`GO:0006508^biological_process^proteolysis
comp10696_c0_seq1	-0.229557	-1.60209	0.942318	1	3	-Inf	3.58496	-Inf	comp10696_c0	.	.	.	.	.	.	.	.	.	.	.
comp10698_c0_seq1	-0.973219	-0.991224	0.681177	1	3.16993	3.32193	3	3.16993	comp10698_c0	.	.	.	.	.	.	.	.	.	.	.
comp10699_c0_seq1	-1.16932	11.0912	0.636906	1	15.2352	16.462	14.8832	15.0931	comp10699_c0	sp|P21531|RL3_RAT^P21531^Q:58-252,H:1-65^95.3846%ID^E:-206.103^RecName: Full=60S ribosomal protein L3;^Eukaryota; Metazoa; Chordata; Craniata; Vertebrata; Euteleostomi; Mammalia; Eutheria; Euarchontoglires; Glires; Rodentia; Sciurognathi; Muroidea; Muridae; Murinae; Rattus	.	m.4394	58-1269[+]	sp|P21531|RL3_RAT^P21531^Q:1-403,H:1-403^93.3002%ID^E:-224.21^RecName: Full=60S ribosomal protein L3;^Eukaryota; Metazoa; Chordata; Craniata; Vertebrata; Euteleostomi; Mammalia; Eutheria; Euarchontoglires; Glires; Rodentia; Sciurognathi; Muroidea; Muridae; Murinae; Rattus	PF00297.17^Ribosomal_L3^Ribosomal protein L3^50-348^E:1.1e-121	.	.	COG0087^Ribosomal protein L3	GO:0005730^cellular_component^nucleolus`GO:0005840^cellular_component^ribosome`GO:0003735^molecular_function^structural constituent of ribosome`GO:0006412^biological_process^translation
comp107_c0_seq1	-0.79321	-1.33109	0.867714	1	2	4.08746	2	2	comp107_c0	.	.	.	.	.	.	.	.	.	.	.
comp1070_c0_seq1	-7.06159	-2.06946	0.0698787	0.914116	3.58496	-Inf	-Inf	-Inf	comp1070_c0	.	.	.	.	.	.	.	.	.	.	.
comp10700_c0_seq1	1.03502	-0.69027	0.722335	1	1.58496	3.90689	3.45943	4.24793	comp10700_c0	.	.	.	.	.	.	.	.	.	.	.
comp10701_c0_seq1	-0.131304	7.36549	0.935653	1	10.5216	11.9281	11.2076	12.719	comp10701_c0	sp|P12902|HM14A_CHICK^P12902^Q:896-825,H:1-24^83.3333%ID^E:-10.7338^RecName: Full=Non-histone chromosomal protein HMG-14A;^Eukaryota; Metazoa; Chordata; Craniata; Vertebrata; Euteleostomi; Archosauria; Dinosauria; Saurischia; Theropoda; Coelurosauria; Aves; Neognathae; Galliformes; Phasianidae; Phasianinae; Gallus	.	.	.	.	.	.	.	NOG29368^High-Mobility group nucleosome binding domain protein	GO:0000785^cellular_component^chromatin`GO:0005634^cellular_component^nucleus`GO:0031492^molecular_function^nucleosomal DNA binding	.
comp10701_c0_seq2	-0.0324987	7.68774	0.98472	1	11.0063	12.7119	11.7912	12.6459	comp10701_c0	sp|P12902|HM14A_CHICK^P12902^Q:916-845,H:1-24^83.3333%ID^E:-15.8378^RecName: Full=Non-histone chromosomal protein HMG-14A;^Eukaryota; Metazoa; Chordata; Craniata; Vertebrata; Euteleostomi; Archosauria; Dinosauria; Saurischia; Theropoda; Coelurosauria; Aves; Neognathae; Galliformes; Phasianidae; Phasianinae; Gallus	.	m.4396	608-916[-]	sp|P12902|HM14A_CHICK^P12902^Q:1-102,H:1-105^83.8095%ID^E:-42.7^RecName: Full=Non-histone chromosomal protein HMG-14A;^Eukaryota; Metazoa; Chordata; Craniata; Vertebrata; Euteleostomi; Archosauria; Dinosauria; Saurischia; Theropoda; Coelurosauria; Aves; Neognathae; Galliformes; Phasianidae; Phasianinae; Gallus	PF01101.13^HMG14_17^HMG14 and HMG17^2-98^E:8.6e-27	.	.	NOG29368^High-Mobility group nucleosome binding domain protein	GO:0000785^cellular_component^chromatin`GO:0005634^cellular_component^nucleus`GO:0031492^molecular_function^nucleosomal DNA binding
comp10702_c0_seq1	-2.18738	-0.474645	0.30217	1	4.39232	4.08746	3	2.80735	comp10702_c0	.	.	.	.	.	.	.	.	.	.	.
comp10703_c0_seq1	0.394675	-1.22218	1	1	1.58496	3.58496	2.80735	3.16993	comp10703_c0	.	.	.	.	.	.	.	.	.	.	.
comp10704_c0_seq1	-1.78952	1.08243	0.394694	1	5.97728	4.45943	5	5.12928	comp10704_c0	.	.	.	.	.	.	.	.	.	.	.
comp10705_c0_seq1	4.30815	-1.15777	0.628116	1	-Inf	2.58496	1.58496	4.52356	comp10705_c0	.	.	.	.	.	.	.	.	.	.	.
comp10706_c0_seq1	-0.29847	-0.982647	0.928212	1	2.80735	3.58496	3.32193	3	comp10706_c0	.	.	.	.	.	.	.	.	.	.	.
comp10707_c0_seq1	0.473431	7.76139	0.779257	1	10.7194	13.0114	12.0102	12.6602	comp10707_c0	sp|Q5ZMN0|AN32B_CHICK^Q5ZMN0^Q:642-163,H:1-160^86.25%ID^E:-74.75^RecName: Full=Acidic leucine-rich nuclear phosphoprotein 32 family member B;^Eukaryota; Metazoa; Chordata; Craniata; Vertebrata; Euteleostomi; Archosauria; Dinosauria; Saurischia; Theropoda; Coelurosauria; Aves; Neognathae; Galliformes; Phasianidae; Phasianinae; Gallus	.	m.4397	1-642[-]	sp|Q5ZMN0|AN32B_CHICK^Q5ZMN0^Q:1-214,H:1-220^80.6306%ID^E:-94.32^RecName: Full=Acidic leucine-rich nuclear phosphoprotein 32 family member B;^Eukaryota; Metazoa; Chordata; Craniata; Vertebrata; Euteleostomi; Archosauria; Dinosauria; Saurischia; Theropoda; Coelurosauria; Aves; Neognathae; Galliformes; Phasianidae; Phasianinae; Gallus	PF13504.1^LRR_7^Leucine rich repeat^19-28^E:160`PF13504.1^LRR_7^Leucine rich repeat^43-54^E:2100`PF13855.1^LRR_8^Leucine rich repeat^65-124^E:4.6e-07`PF13504.1^LRR_7^Leucine rich repeat^65-77^E:7.4`PF13504.1^LRR_7^Leucine rich repeat^88-103^E:0.53`PF13516.1^LRR_6^Leucine Rich repeat^88-103^E:0.019`PF12799.2^LRR_4^Leucine Rich repeats (2 copies)^89-127^E:1.8e-08`PF00560.28^LRR_1^Leucine Rich Repea…	.	.	.	GO:0005634^cellular_component^nucleus
comp10709_c0_seq1	-0.434077	1.42777	0.837472	1	5.04439	6.85798	5.42626	5.67243	comp10709_c0	.	.	.	.	.	.	.	.	.	.	.
comp10709_c0_seq2	1.69499	0.931186	0.448623	1	3	4.85798	5.52356	6.24793	comp10709_c0	.	.	.	.	.	.	.	.	.	.	.
comp10711_c0_seq1	0.0562995	-0.739612	1	1	2.58496	4.70044	3.45943	2.32193	comp10711_c0	.	.	.	.	.	.	.	.	.	.	.
comp10712_c0_seq1	1.10833	7.6845	0.511645	1	10.8041	13.0238	12.7298	11.4131	comp10712_c0	sp|Q8I030|CYTB_PANTR^Q8I030^Q:511-218,H:1-98^52.0408%ID^E:-23.61^RecName: Full=Cystatin-B;^Eukaryota; Metazoa; Chordata; Craniata; Vertebrata; Euteleostomi; Mammalia; Eutheria; Euarchontoglires; Primates; Haplorrhini; Catarrhini; Hominidae; Pan	.	.	.	.	.	.	.	NOG29074^Cystatin-B protein	GO:0005737^cellular_component^cytoplasm`GO:0005730^cellular_component^nucleolus`GO:0004869^molecular_function^cysteine-type endopeptidase inhibitor activity`GO:0008344^biological_process^adult locomotory behavior`GO:0010951^biological_process^negative regulation of endopeptidase activity	.
comp10713_c0_seq1	-0.79321	-1.55702	0.868356	1	2	3.45943	2	2	comp10713_c0	.	.	.	.	.	.	.	.	.	.	.
comp10714_c0_seq1	-0.924053	8.14005	0.601676	1	12.4499	12.1437	12.3432	12.6522	comp10714_c0	.	.	.	.	.	.	.	.	.	.	.
comp10715_c0_seq1	0.00459336	8.12613	0.998059	1	11.7628	12.7572	12.5847	12.8713	comp10715_c0	sp|O42148|OAZ1_CHICK^O42148^Q:769-296,H:59-216^93.038%ID^E:-100.821^RecName: Full=Ornithine decarboxylase antizyme 1;^Eukaryota; Metazoa; Chordata; Craniata; Vertebrata; Euteleostomi; Archosauria; Dinosauria; Saurischia; Theropoda; Coelurosauria; Aves; Neognathae; Galliformes; Phasianidae; Phasianinae; Gallus	.	.	.	.	.	.	.	NOG248464^Lactoylglutathione lyase	GO:0008073^molecular_function^ornithine decarboxylase inhibitor activity`GO:0043086^biological_process^negative regulation of catalytic activity	.
comp10718_c0_seq1	-0.407057	2.32843	0.843549	1	6.06609	7.65821	6.47573	6.56986	comp10718_c0	sp|Q8TBR7|FA57A_HUMAN^Q8TBR7^Q:1110-820,H:1-96^56.701%ID^E:-81.6527^RecName: Full=Protein FAM57A;^Eukaryota; Metazoa; Chordata; Craniata; Vertebrata; Euteleostomi; Mammalia; Eutheria; Euarchontoglires; Primates; Haplorrhini; Catarrhini; Hominidae; Homo	.	m.4400	319-1146[-]	sp|Q8TBR7|FA57A_HUMAN^Q8TBR7^Q:128-274,H:110-256^63.2653%ID^E:-81.9681^RecName: Full=Protein FAM57A;^Eukaryota; Metazoa; Chordata; Craniata; Vertebrata; Euteleostomi; Mammalia; Eutheria; Euarchontoglires; Primates; Haplorrhini; Catarrhini; Hominidae; Homo	PF03798.11^TRAM_LAG1_CLN8^TLC domain^51-260^E:6.5e-49	.	ExpAA=143.80^PredHel=6^Topology=i12-34o49-71i84-106o137-156i163-185o200-222i	.	GO:0016021^cellular_component^integral to membrane`GO:0005886^cellular_component^plasma membrane
comp1072_c0_seq1	-0.395421	-0.921395	0.918873	1	2.58496	2.80735	3	4.08746	comp1072_c0	sp|Q86X67|NUD13_HUMAN^Q86X67^Q:1-309,H:241-344^60.5769%ID^E:-29.61^RecName: Full=Nucleoside diphosphate-linked moiety X motif 13;^Eukaryota; Metazoa; Chordata; Craniata; Vertebrata; Euteleostomi; Mammalia; Eutheria; Euarchontoglires; Primates; Haplorrhini; Catarrhini; Hominidae; Homo	.	m.72	1-321[+]	sp|Q86X67|NUD13_HUMAN^Q86X67^Q:1-103,H:241-344^60.5769%ID^E:-29.82^RecName: Full=Nucleoside diphosphate-linked moiety X motif 13;^Eukaryota; Metazoa; Chordata; Craniata; Vertebrata; Euteleostomi; Mammalia; Eutheria; Euarchontoglires; Primates; Haplorrhini; Catarrhini; Hominidae; Homo	PF00293.23^NUDIX^NUDIX domain^1-72^E:2.7e-07	.	.	COG2816^NTP pyrophosphohydrolases containing a Zn-finger, probably nucleic-acid-binding	GO:0005739^cellular_component^mitochondrion`GO:0016787^molecular_function^hydrolase activity`GO:0046872^molecular_function^metal ion binding
comp10720_c0_seq1	1.89752	-1.65417	0.509055	1	0	3	2.80735	2.32193	comp10720_c0	.	.	.	.	.	.	.	.	.	.	.
comp10725_c0_seq1	-0.722243	9.23066	0.718997	1	13.0203	14.6792	13.1154	13.5775	comp10725_c0	sp|Q7ZV82|RL27_DANRE^Q7ZV82^Q:483-76,H:1-136^94.8529%ID^E:-67.77^RecName: Full=60S ribosomal protein L27;^Eukaryota; Metazoa; Chordata; Craniata; Vertebrata; Euteleostomi; Actinopterygii; Neopterygii; Teleostei; Ostariophysi; Cypriniformes; Cyprinidae; Danio	.	m.4401	73-561[-]	sp|P61356|RL27_BOVIN^P61356^Q:27-162,H:1-136^97.0588%ID^E:-70.22^RecName: Full=60S ribosomal protein L27;^Eukaryota; Metazoa; Chordata; Craniata; Vertebrata; Euteleostomi; Mammalia; Eutheria; Laurasiatheria; Cetartiodactyla; Ruminantia; Pecora; Bovidae; Bovinae; Bos	PF00467.24^KOW^KOW motif^33-62^E:5.4e-06`PF01777.13^Ribosomal_L27e^Ribosomal L27e protein family^78-162^E:7.9e-39	.	.	COG2163^Ribosomal protein L14E/L6E/L27E	GO:0022625^cellular_component^cytosolic large ribosomal subunit`GO:0003735^molecular_function^structural constituent of ribosome`GO:0006412^biological_process^translation
comp10726_c0_seq1	2.77569	-0.997808	0.247628	1	0	3.16993	3.70044	3.80735	comp10726_c0	.	.	.	.	.	.	.	.	.	.	.
comp10727_c0_seq1	-1.77716	-1.37001	0.452713	1	3	1	2	3.45943	comp10727_c0	.	.	.	.	.	.	.	.	.	.	.
comp10729_c0_seq1	0.707565	-0.388155	0.741188	1	3.16993	4.52356	4.70044	1.58496	comp10729_c0	.	.	.	.	.	.	.	.	.	.	.
comp1073_c0_seq1	-1.58682	-1.42118	0.546234	1	2.80735	3.80735	2	0	comp1073_c0	.	.	.	.	.	.	.	.	.	.	.
comp10730_c0_seq1	1.31408	-1.62082	0.677902	1	1	3.45943	3.16993	-Inf	comp10730_c0	.	.	.	.	.	.	.	.	.	.	.
comp10731_c0_seq1	-0.584043	-1.03339	0.826989	1	2.58496	4.24793	2.80735	2.32193	comp10731_c0	.	.	.	.	.	.	.	.	.	.	.
comp10733_c0_seq1	1.42489	-1.29363	0.614533	1	0	3.90689	2.32193	3.16993	comp10733_c0	.	.	.	.	.	.	.	.	.	.	.
comp10734_c0_seq1	-1.18993	-1.85822	0.709206	1	2	3	1.58496	1	comp10734_c0	.	.	.	.	.	.	.	.	.	.	.
comp10735_c0_seq1	2.88136	-0.526996	0.223039	1	0	4	3.80735	4.58496	comp10735_c0	.	.	.	.	.	.	.	.	.	.	.
comp10736_c0_seq1	1.14729	-1.6172	0.763398	1	1	2	3	2.80735	comp10736_c0	.	.	.	.	.	.	.	.	.	.	.
comp10738_c0_seq1	0.315052	-0.909124	1	1	2.32193	4.24793	3.45943	2.58496	comp10738_c0	.	.	.	.	.	.	.	.	.	.	.
comp10739_c0_seq1	-0.00976039	-1.09909	1	1	2	4.45943	2.80735	1.58496	comp10739_c0	.	.	.	.	.	.	.	.	.	.	.
comp1074_c0_seq1	-0.395421	-0.960691	0.918888	1	2.58496	3.70044	3	3.45943	comp1074_c0	sp|Q15911|ZFHX3_HUMAN^Q15911^Q:385-98,H:286-381^92.7083%ID^E:-45.82^RecName: Full=Zinc finger homeobox protein 3;^Eukaryota; Metazoa; Chordata; Craniata; Vertebrata; Euteleostomi; Mammalia; Eutheria; Euarchontoglires; Primates; Haplorrhini; Catarrhini; Hominidae; Homo	.	m.73	2-385[-]	sp|Q15911|ZFHX3_HUMAN^Q15911^Q:1-96,H:286-381^92.7083%ID^E:-45.82^RecName: Full=Zinc finger homeobox protein 3;^Eukaryota; Metazoa; Chordata; Craniata; Vertebrata; Euteleostomi; Mammalia; Eutheria; Euarchontoglires; Primates; Haplorrhini; Catarrhini; Hominidae; Homo	.	.	.	.	GO:0005739^cellular_component^mitochondrion`GO:0005667^cellular_component^transcription factor complex`GO:0046872^molecular_function^metal ion binding`GO:0003705^molecular_function^RNA polymerase II distal enhancer sequence-specific DNA binding transcription factor activity`GO:0043565^molecular_function^sequence-specific DNA binding`GO:0044212^molecular_function^transcription regulatory region DN…
comp10740_c0_seq1	0.181476	-0.229941	0.935638	1	3.70044	3.16993	4.70044	4	comp10740_c0	.	.	.	.	.	.	.	.	.	.	.
comp10741_c0_seq1	1.32217	9.13329	0.509744	1	11.2597	14.868	13.3993	13.8625	comp10741_c0	sp|Q28009|FUS_BOVIN^Q28009^Q:2638-2603,H:36-47^83.3333%ID^E:-85.5796^RecName: Full=RNA-binding protein FUS;^Eukaryota; Metazoa; Chordata; Craniata; Vertebrata; Euteleostomi; Mammalia; Eutheria; Laurasiatheria; Cetartiodactyla; Ruminantia; Pecora; Bovidae; Bovinae; Bos	.	m.4402	1076-2752[-]	sp|P56959|FUS_MOUSE^P56959^Q:1-558,H:1-518^69.8795%ID^E:-204.44^RecName: Full=RNA-binding protein FUS;^Eukaryota; Metazoa; Chordata; Craniata; Vertebrata; Euteleostomi; Mammalia; Eutheria; Euarchontoglires; Glires; Rodentia; Sciurognathi; Muroidea; Muridae; Murinae; Mus; Mus	PF00076.17^RRM_1^RNA recognition motif. (a.k.a. RRM, RBD, or RNP domain)^318-396^E:2.4e-10`PF14259.1^RRM_6^RNA recognition motif (a.k.a. RRM, RBD, or RNP domain)^318-396^E:9.1e-05`PF00641.13^zf-RanBP^Zn-finger in Ran binding protein and others^453-484^E:4.4e-11	.	.	NOG240581^Protein involved in mitochondrion organization	GO:0005737^cellular_component^cytoplasm`GO:0005634^cellular_component^nucleus`GO:0003677^molecular_function^DNA binding`GO:0046872^molecular_function^metal ion binding`GO:0000166^molecular_function^nucleotide binding`GO:0003723^molecular_function^RNA binding`GO:0008270^molecular_function^zinc ion binding
comp10741_c0_seq1	1.32217	9.13329	0.509744	1	11.2597	14.868	13.3993	13.8625	comp10741_c0	sp|Q28009|FUS_BOVIN^Q28009^Q:2638-2603,H:36-47^83.3333%ID^E:-85.5796^RecName: Full=RNA-binding protein FUS;^Eukaryota; Metazoa; Chordata; Craniata; Vertebrata; Euteleostomi; Mammalia; Eutheria; Laurasiatheria; Cetartiodactyla; Ruminantia; Pecora; Bovidae; Bovinae; Bos	.	m.4405	877-1335[-]	.	.	.	.	.	.
comp10744_c0_seq1	-0.822361	10.2104	0.71399	1	14.211	15.6027	14.2059	14.2527	comp10744_c0	sp|P47836|RS4_CHICK^P47836^Q:876-88,H:1-263^96.1977%ID^E:-147.03^RecName: Full=40S ribosomal protein S4;^Eukaryota; Metazoa; Chordata; Craniata; Vertebrata; Euteleostomi; Archosauria; Dinosauria; Saurischia; Theropoda; Coelurosauria; Aves; Neognathae; Galliformes; Phasianidae; Phasianinae; Gallus	.	m.4408	85-936[-]	sp|P47836|RS4_CHICK^P47836^Q:21-283,H:1-263^96.1977%ID^E:-147.09^RecName: Full=40S ribosomal protein S4;^Eukaryota; Metazoa; Chordata; Craniata; Vertebrata; Euteleostomi; Archosauria; Dinosauria; Saurischia; Theropoda; Coelurosauria; Aves; Neognathae; Galliformes; Phasianidae; Phasianinae; Gallus	PF08071.7^RS4NT^RS4NT (NUC023) domain^23-60^E:9.8e-21`PF01479.20^S4^S4 domain^63-110^E:2.8e-05`PF00900.15^Ribosomal_S4e^Ribosomal family S4e^114-190^E:4.5e-32`PF00467.24^KOW^KOW motif^198-231^E:9.6e-05	.	.	COG1471^Ribosomal protein S4E	GO:0005840^cellular_component^ribosome`GO:0019843^molecular_function^rRNA binding`GO:0003735^molecular_function^structural constituent of ribosome`GO:0006412^biological_process^translation
comp10745_c0_seq1	-1.21734	9.47021	0.558402	1	13.5597	14.9852	13.1597	13.4246	comp10745_c0	sp|P62752|RL23A_RAT^P62752^Q:273-596,H:49-156^99.0741%ID^E:-60.8833^RecName: Full=60S ribosomal protein L23a;^Eukaryota; Metazoa; Chordata; Craniata; Vertebrata; Euteleostomi; Mammalia; Eutheria; Euarchontoglires; Glires; Rodentia; Sciurognathi; Muroidea; Muridae; Murinae; Rattus	.	m.4410	132-599[+]	sp|Q24JY1|RL23A_BOVIN^Q24JY1^Q:1-155,H:1-156^93.5897%ID^E:-76.3^RecName: Full=60S ribosomal protein L23a;^Eukaryota; Metazoa; Chordata; Craniata; Vertebrata; Euteleostomi; Mammalia; Eutheria; Laurasiatheria; Cetartiodactyla; Ruminantia; Pecora; Bovidae; Bovinae; Bos	PF03939.8^Ribosomal_L23eN^Ribosomal protein L23, N-terminal domain^15-67^E:4.9e-21`PF00276.15^Ribosomal_L23^Ribosomal protein L23^74-151^E:1.3e-20	.	.	COG0089^Ribosomal protein L23	GO:0005634^cellular_component^nucleus`GO:0005840^cellular_component^ribosome`GO:0000166^molecular_function^nucleotide binding`GO:0019843^molecular_function^rRNA binding`GO:0003735^molecular_function^structural constituent of ribosome`GO:0006412^biological_process^translation
comp10747_c0_seq1	-2.43098	0.543612	0.250088	1	4.9542	6.30378	3.32193	3	comp10747_c0	sp|O70556|SPR2E_MOUSE^O70556^Q:357-148,H:6-66^35.6164%ID^E:-0.43^RecName: Full=Small proline-rich protein 2E;^Eukaryota; Metazoa; Chordata; Craniata; Vertebrata; Euteleostomi; Mammalia; Eutheria; Euarchontoglires; Glires; Rodentia; Sciurognathi; Muroidea; Muridae; Murinae; Mus; Mus	.	.	.	.	.	.	.	.	GO:0001533^cellular_component^cornified envelope`GO:0005737^cellular_component^cytoplasm`GO:0031424^biological_process^keratinization`GO:0030216^biological_process^keratinocyte differentiation`GO:0032355^biological_process^response to estradiol stimulus	.
comp10748_c0_seq1	1.62024	-0.480693	0.434333	1	2	3.32193	4.45943	4.24793	comp10748_c0	.	.	.	.	.	.	.	.	.	.	.
comp1075_c0_seq1	5.67693	-1.07008	0.214607	1	-Inf	4.90689	3	0	comp1075_c0	.	.	.	.	.	.	.	.	.	.	.
comp10750_c0_seq1	7.464	-0.824825	0.0441575	0.741718	-Inf	3.32193	4.80735	2.32193	comp10750_c0	.	.	.	.	.	.	.	.	.	.	.
comp10751_c0_seq1	-0.611903	3.61708	0.731127	1	7.75489	8.50383	7.96	7.6865	comp10751_c0	.	.	.	.	.	.	.	.	.	.	.
comp10752_c0_seq1	-1.0135	6.05479	0.501668	1	10.0728	11.4661	9.87652	10.1849	comp10752_c0	sp|P67872|CSK2B_PIG^P67872^Q:319-792,H:57-214^100%ID^E:-117.799^RecName: Full=Casein kinase II subunit beta;^Eukaryota; Metazoa; Chordata; Craniata; Vertebrata; Euteleostomi; Mammalia; Eutheria; Laurasiatheria; Cetartiodactyla; Suina; Suidae; Sus	.	m.4412	151-798[+]	sp|P67868|CSK2B_BOVIN^P67868^Q:1-215,H:1-215^100%ID^E:-127.7^RecName: Full=Casein kinase II subunit beta;^Eukaryota; Metazoa; Chordata; Craniata; Vertebrata; Euteleostomi; Mammalia; Eutheria; Laurasiatheria; Cetartiodactyla; Ruminantia; Pecora; Bovidae; Bovinae; Bos	PF01214.13^CK_II_beta^Casein kinase II regulatory subunit^8-191^E:7.2e-85	.	.	COG5041^Casein kinase II, beta subunit	GO:0005737^cellular_component^cytoplasm`GO:0031519^cellular_component^PcG protein complex`GO:0005886^cellular_component^plasma membrane`GO:0005956^cellular_component^protein kinase CK2 complex`GO:0046872^molecular_function^metal ion binding`GO:0019887^molecular_function^protein kinase regulator activity`GO:0033211^biological_process^adiponectin-mediated signaling pathway`GO:0061154^biological_pro…
comp10755_c0_seq1	0.438864	-0.980833	0.928211	1	2.32193	3.90689	3.58496	2.58496	comp10755_c0	.	.	.	.	.	.	.	.	.	.	.
comp10756_c0_seq1	0.495139	-0.946759	0.826887	1	2	2	3.32193	4.24793	comp10756_c0	.	.	.	.	.	.	.	.	.	.	.
comp10757_c0_seq1	-0.542336	-1.03467	0.799252	1	2.32193	3	2.58496	4	comp10757_c0	.	.	.	.	.	.	.	.	.	.	.
comp10758_c0_seq1	1.68047	-1.8452	0.511137	1	0	2	2.58496	2.58496	comp10758_c0	.	.	.	.	.	.	.	.	.	.	.
comp10759_c0_seq1	0.0939304	1.33291	0.980305	1	5.39232	5.78136	6.30378	4.85798	comp10759_c0	sp|Q6AYZ1|TBA1C_RAT^Q6AYZ1^Q:1-201,H:47-113^100%ID^E:-32.95^RecName: Full=Tubulin alpha-1C chain;^Eukaryota; Metazoa; Chordata; Craniata; Vertebrata; Euteleostomi; Mammalia; Eutheria; Euarchontoglires; Glires; Rodentia; Sciurognathi; Muroidea; Muridae; Murinae; Rattus	.	.	.	.	.	.	.	COG5023^Tubulin	GO:0005881^cellular_component^cytoplasmic microtubule`GO:0005525^molecular_function^GTP binding`GO:0003924^molecular_function^GTPase activity`GO:0005198^molecular_function^structural molecule activity`GO:0007018^biological_process^microtubule-based movement`GO:0051258^biological_process^protein polymerization	.
comp1076_c0_seq1	-4.19965	-1.01956	0.142072	1	3.58496	3.58496	0	3.32193	comp1076_c0	.	.	.	.	.	.	.	.	.	.	.
comp10761_c0_seq1	2.40242	-1.25118	0.317728	1	0	4.32193	3.32193	0	comp10761_c0	.	.	.	.	.	.	.	.	.	.	.
comp10763_c0_seq1	-2.05446	-1.85159	0.371712	1	2.32193	3	1	1	comp10763_c0	sp|P79621|C2TA_MOUSE^P79621^Q:116-226,H:302-338^56.7568%ID^E:-4.42^RecName: Full=MHC class II transactivator;^Eukaryota; Metazoa; Chordata; Craniata; Vertebrata; Euteleostomi; Mammalia; Eutheria; Euarchontoglires; Glires; Rodentia; Sciurognathi; Muroidea; Muridae; Murinae; Mus; Mus	.	.	.	.	.	.	.	.	GO:0005634^cellular_component^nucleus`GO:0005524^molecular_function^ATP binding`GO:0032403^molecular_function^protein complex binding`GO:0044212^molecular_function^transcription regulatory region DNA binding`GO:0000122^biological_process^negative regulation of transcription from RNA polymerase II promoter`GO:0045892^biological_process^negative regulation of transcription, DNA-dependent`GO:0045345…	.
comp10765_c0_seq1	-1.94529	-1.27329	0.414819	1	3.16993	3.70044	2	1.58496	comp10765_c0	.	.	m.4413	2-313[+]	.	.	.	.	.	.
comp10766_c0_seq1	0.583298	-1.31705	0.890931	1	1.58496	3.80735	3	2	comp10766_c0	.	.	.	.	.	.	.	.	.	.	.
comp10767_c0_seq1	-2.63613	-1.14309	0.505088	1	2	4.85798	0	1	comp10767_c0	.	.	.	.	.	.	.	.	.	.	.
comp10769_c0_seq1	0.079449	2.30801	0.977919	1	5.85798	7.70736	6.75489	6.32193	comp10769_c0	sp|Q6DI92|CS068_MOUSE^Q6DI92^Q:2206-2670,H:182-337^37.8205%ID^E:-62.8264^RecName: Full=Uncharacterized protein C19orf68 homolog;^Eukaryota; Metazoa; Chordata; Craniata; Vertebrata; Euteleostomi; Mammalia; Eutheria; Euarchontoglires; Glires; Rodentia; Sciurognathi; Muroidea; Muridae; Murinae; Mus; Mus	.	m.4418	70-477[-]	.	.	.	.	.	.
comp10769_c0_seq1	0.079449	2.30801	0.977919	1	5.85798	7.70736	6.75489	6.32193	comp10769_c0	sp|Q6DI92|CS068_MOUSE^Q6DI92^Q:2206-2670,H:182-337^37.8205%ID^E:-62.8264^RecName: Full=Uncharacterized protein C19orf68 homolog;^Eukaryota; Metazoa; Chordata; Craniata; Vertebrata; Euteleostomi; Mammalia; Eutheria; Euarchontoglires; Glires; Rodentia; Sciurognathi; Muroidea; Muridae; Murinae; Mus; Mus	.	m.4414	328-5145[+]	sp|Q6DI92|CS068_MOUSE^Q6DI92^Q:627-781,H:182-337^37.8205%ID^E:-62.8534^RecName: Full=Uncharacterized protein C19orf68 homolog;^Eukaryota; Metazoa; Chordata; Craniata; Vertebrata; Euteleostomi; Mammalia; Eutheria; Euarchontoglires; Glires; Rodentia; Sciurognathi; Muroidea; Muridae; Murinae; Mus; Mus	.	.	.	NOG86879^Protein C19orf68	.
comp10769_c0_seq2	1.04998	3.89759	0.545011	1	6.37504	9.49386	8.24317	8.55075	comp10769_c0	sp|Q6DI92|CS068_MOUSE^Q6DI92^Q:4135-4485,H:182-298^35.8974%ID^E:-62.8175^RecName: Full=Uncharacterized protein C19orf68 homolog;^Eukaryota; Metazoa; Chordata; Craniata; Vertebrata; Euteleostomi; Mammalia; Eutheria; Euarchontoglires; Glires; Rodentia; Sciurognathi; Muroidea; Muridae; Murinae; Mus; Mus	.	m.4425	70-477[-]	.	.	.	.	.	.
comp10769_c0_seq2	1.04998	3.89759	0.545011	1	6.37504	9.49386	8.24317	8.55075	comp10769_c0	sp|Q6DI92|CS068_MOUSE^Q6DI92^Q:4135-4485,H:182-298^35.8974%ID^E:-62.8175^RecName: Full=Uncharacterized protein C19orf68 homolog;^Eukaryota; Metazoa; Chordata; Craniata; Vertebrata; Euteleostomi; Mammalia; Eutheria; Euarchontoglires; Glires; Rodentia; Sciurognathi; Muroidea; Muridae; Murinae; Mus; Mus	.	m.4421	328-5040[+]	sp|Q6DI92|CS068_MOUSE^Q6DI92^Q:1270-1386,H:182-298^35.8974%ID^E:-62.8634^RecName: Full=Uncharacterized protein C19orf68 homolog;^Eukaryota; Metazoa; Chordata; Craniata; Vertebrata; Euteleostomi; Mammalia; Eutheria; Euarchontoglires; Glires; Rodentia; Sciurognathi; Muroidea; Muridae; Murinae; Mus; Mus	.	.	.	NOG86879^Protein C19orf68	.
comp1077_c0_seq1	2.25293	-1.59601	0.368459	1	0	2.80735	3.16993	2.32193	comp1077_c0	.	.	.	.	.	.	.	.	.	.	.
comp10770_c0_seq1	-0.785489	-1.41458	0.832055	1	1.58496	4	1.58496	2.32193	comp10770_c0	.	.	.	.	.	.	.	.	.	.	.
comp10773_c0_seq1	0.17763	-1.60591	1	1	1.58496	3.32193	2.58496	1.58496	comp10773_c0	.	.	.	.	.	.	.	.	.	.	.
comp10774_c0_seq1	1.14729	-0.702022	0.760855	1	1	2.80735	3	4.85798	comp10774_c0	.	.	.	.	.	.	.	.	.	.	.
comp10775_c0_seq1	1.15883	-0.664363	0.657025	1	1.58496	2.58496	3.58496	4.70044	comp10775_c0	.	.	.	.	.	.	.	.	.	.	.
comp10776_c0_seq1	0.278923	-0.825496	0.941588	1	2.80735	4.08746	3.90689	2	comp10776_c0	.	.	.	.	.	.	.	.	.	.	.
comp10777_c0_seq1	-0.221499	-1.76257	1	1	1	1	1.58496	3.45943	comp10777_c0	.	.	.	.	.	.	.	.	.	.	.
comp10778_c0_seq1	-2.23169	-1.50202	0.615845	1	1.58496	4.45943	0	-Inf	comp10778_c0	.	.	.	.	.	.	.	.	.	.	.
comp10779_c0_seq1	0.630582	-1.21095	0.827369	1	2	3.45943	3.45943	2.32193	comp10779_c0	.	.	.	.	.	.	.	.	.	.	.
comp1078_c0_seq1	5.27127	-1.83286	0.269129	1	-Inf	3.16993	2.58496	1.58496	comp1078_c0	sp|B0FPE9|NALP3_MACMU^B0FPE9^Q:25-252,H:205-280^59.7403%ID^E:-18.8^RecName: Full=NACHT, LRR and PYD domains-containing protein 3;^Eukaryota; Metazoa; Chordata; Craniata; Vertebrata; Euteleostomi; Mammalia; Eutheria; Euarchontoglires; Primates; Haplorrhini; Catarrhini; Cercopithecidae; Cercopithecinae; Macaca	.	.	.	.	.	.	.	NOG82860^NLR family, pyrin domain containing protein	GO:0005737^cellular_component^cytoplasm`GO:0072559^cellular_component^NLRP3 inflammasome complex`GO:0005524^molecular_function^ATP binding`GO:0006919^biological_process^activation of cysteine-type endopeptidase activity involved in apoptotic process`GO:0051607^biological_process^defense response to virus`GO:0006954^biological_process^inflammatory response`GO:0050701^biological_process^interleukin…	.
comp10780_c0_seq1	-2.49257	-1.41817	0.28666	1	3.32193	3.32193	1.58496	1	comp10780_c0	.	.	.	.	.	.	.	.	.	.	.
comp10781_c0_seq1	2.3788	-0.513492	0.353825	1	1	5.16993	4.24793	1.58496	comp10781_c0	.	.	.	.	.	.	.	.	.	.	.
comp10782_c0_seq1	5.48831	-1.792	0.268669	1	-Inf	3.45943	2.80735	0	comp10782_c0	sp|Q6TAC4|V2R26_MOUSE^Q6TAC4^Q:85-2,H:559-586^53.5714%ID^E:-2.81^RecName: Full=Vomeronasal type-2 receptor 26;^Eukaryota; Metazoa; Chordata; Craniata; Vertebrata; Euteleostomi; Mammalia; Eutheria; Euarchontoglires; Glires; Rodentia; Sciurognathi; Muroidea; Muridae; Murinae; Mus; Mus	.	.	.	.	.	.	.	.	GO:0016021^cellular_component^integral to membrane`GO:0005886^cellular_component^plasma membrane`GO:0004930^molecular_function^G-protein coupled receptor activity`GO:0019236^biological_process^response to pheromone	.
comp10783_c0_seq1	3.75915	-1.54668	0.629694	1	-Inf	3.70044	1	3.16993	comp10783_c0	.	.	.	.	.	.	.	.	.	.	.
comp10784_c0_seq1	0.931452	5.70087	0.537603	1	8.38802	10.5118	10.137	10.84	comp10784_c0	sp|Q92804|RBP56_HUMAN^Q92804^Q:617-676,H:572-591^95%ID^E:-66.3763^RecName: Full=TATA-binding protein-associated factor 2N;^Eukaryota; Metazoa; Chordata; Craniata; Vertebrata; Euteleostomi; Mammalia; Eutheria; Euarchontoglires; Primates; Haplorrhini; Catarrhini; Hominidae; Homo	.	m.4429	333-773[+]	.	.	.	.	.	.
comp10784_c0_seq1	0.931452	5.70087	0.537603	1	8.38802	10.5118	10.137	10.84	comp10784_c0	sp|Q92804|RBP56_HUMAN^Q92804^Q:617-676,H:572-591^95%ID^E:-66.3763^RecName: Full=TATA-binding protein-associated factor 2N;^Eukaryota; Metazoa; Chordata; Craniata; Vertebrata; Euteleostomi; Mammalia; Eutheria; Euarchontoglires; Primates; Haplorrhini; Catarrhini; Hominidae; Homo	.	m.4428	2-682[+]	sp|Q92804|RBP56_HUMAN^Q92804^Q:122-226,H:328-446^59.6639%ID^E:-89.6764^RecName: Full=TATA-binding protein-associated factor 2N;^Eukaryota; Metazoa; Chordata; Craniata; Vertebrata; Euteleostomi; Mammalia; Eutheria; Euarchontoglires; Primates; Haplorrhini; Catarrhini; Hominidae; Homo	PF00076.17^RRM_1^RNA recognition motif. (a.k.a. RRM, RBD, or RNP domain)^11-88^E:3e-12`PF14259.1^RRM_6^RNA recognition motif (a.k.a. RRM, RBD, or RNP domain)^11-86^E:5.5e-08`PF00641.13^zf-RanBP^Zn-finger in Ran binding protein and others^143-174^E:5.3e-08	.	.	NOG240581^Protein involved in mitochondrion organization	GO:0005737^cellular_component^cytoplasm`GO:0005634^cellular_component^nucleus`GO:0003677^molecular_function^DNA binding`GO:0046872^molecular_function^metal ion binding`GO:0000166^molecular_function^nucleotide binding`GO:0003723^molecular_function^RNA binding`GO:0008270^molecular_function^zinc ion binding`GO:0045893^biological_process^positive regulation of transcription, DNA-dependent
comp10785_c0_seq1	0.457709	0.0756041	0.843994	1	2.80735	5.64386	4.08746	4.24793	comp10785_c0	.	.	m.4430	357-725[-]	.	.	.	.	.	.
comp10787_c0_seq1	-2.17388	-1.32774	0.341795	1	3	3.80735	1.58496	1.58496	comp10787_c0	.	.	.	.	.	.	.	.	.	.	.
comp10788_c0_seq1	-0.805088	-1.20448	0.730944	1	3	3	3	2.58496	comp10788_c0	.	.	.	.	.	.	.	.	.	.	.
comp1079_c0_seq1	-2.05446	-1.70456	0.369776	1	2.32193	3.45943	1	1	comp1079_c0	sp|Q3U1Y4|DEN4B_MOUSE^Q3U1Y4^Q:36-233,H:1223-1277^53.0303%ID^E:-6.86^RecName: Full=DENN domain-containing protein 4B;^Eukaryota; Metazoa; Chordata; Craniata; Vertebrata; Euteleostomi; Mammalia; Eutheria; Euarchontoglires; Glires; Rodentia; Sciurognathi; Muroidea; Muridae; Murinae; Mus; Mus	.	.	.	.	.	.	.	.	GO:0005794^cellular_component^Golgi apparatus`GO:0017112^molecular_function^Rab guanyl-nucleotide exchange factor activity	.
comp10790_c0_seq1	-1.33449	-1.77183	0.618021	1	1.58496	3.45943	1	1.58496	comp10790_c0	.	.	.	.	.	.	.	.	.	.	.
comp10791_c0_seq1	-0.807508	-0.818579	0.710283	1	3.32193	3.80735	3.32193	3	comp10791_c0	.	.	.	.	.	.	.	.	.	.	.
comp10792_c0_seq1	-8.63934	-0.759345	0.0140929	0.47256	5.16993	-Inf	-Inf	-Inf	comp10792_c0	sp|Q9JM58|CRLF1_MOUSE^Q9JM58^Q:384-298,H:383-411^62.069%ID^E:-5.36^RecName: Full=Cytokine receptor-like factor 1;^Eukaryota; Metazoa; Chordata; Craniata; Vertebrata; Euteleostomi; Mammalia; Eutheria; Euarchontoglires; Glires; Rodentia; Sciurognathi; Muroidea; Muridae; Murinae; Mus; Mus	.	.	.	.	.	.	.	NOG43001^Cytokine receptor-like factor	GO:0097058^cellular_component^CRLF-CLCF1 complex`GO:0005737^cellular_component^cytoplasm`GO:0005886^cellular_component^plasma membrane`GO:0046982^molecular_function^protein heterodimerization activity`GO:2000672^biological_process^negative regulation of motor neuron apoptotic process`GO:0008284^biological_process^positive regulation of cell proliferation`GO:0042517^biological_process^positive reg…	.
comp10793_c0_seq1	-3.21041	-1.57437	0.320877	1	2.58496	3.90689	0	0	comp10793_c0	.	.	.	.	.	.	.	.	.	.	.
comp10794_c0_seq1	-0.136668	-1.21404	1	1	2.32193	4.16993	3	0	comp10794_c0	sp|Q99M71|EPDR1_MOUSE^Q99M71^Q:247-182,H:201-222^81.8182%ID^E:-3.85^RecName: Full=Mammalian ependymin-related protein 1;^Eukaryota; Metazoa; Chordata; Craniata; Vertebrata; Euteleostomi; Mammalia; Eutheria; Euarchontoglires; Glires; Rodentia; Sciurognathi; Muroidea; Muridae; Murinae; Mus; Mus	.	.	.	.	.	.	.	NOG39671^Ependymin-Related protein 1	GO:0005576^cellular_component^extracellular region`GO:0005764^cellular_component^lysosome`GO:0005509^molecular_function^calcium ion binding`GO:0007160^biological_process^cell-matrix adhesion	.
comp10795_c0_seq1	1.89752	-1.64127	0.508924	1	0	3.70044	2.80735	0	comp10795_c0	.	.	.	.	.	.	.	.	.	.	.
comp10796_c0_seq1	-0.797918	-1.62908	0.801491	1	2.32193	3	2.32193	1.58496	comp10796_c0	.	.	.	.	.	.	.	.	.	.	.
comp10798_c0_seq1	0.0938018	6.64471	0.951598	1	10.0196	12.022	10.9307	11.1555	comp10798_c0	sp|P84169|PSD13_CHICK^P84169^Q:141-1244,H:9-376^88.587%ID^E:-185.22^RecName: Full=26S proteasome non-ATPase regulatory subunit 13;^Eukaryota; Metazoa; Chordata; Craniata; Vertebrata; Euteleostomi; Archosauria; Dinosauria; Saurischia; Theropoda; Coelurosauria; Aves; Neognathae; Galliformes; Phasianidae; Phasianinae; Gallus	.	m.4432	111-1247[+]	sp|P84169|PSD13_CHICK^P84169^Q:1-378,H:1-376^88.8889%ID^E:-192.36^RecName: Full=26S proteasome non-ATPase regulatory subunit 13;^Eukaryota; Metazoa; Chordata; Craniata; Vertebrata; Euteleostomi; Archosauria; Dinosauria; Saurischia; Theropoda; Coelurosauria; Aves; Neognathae; Galliformes; Phasianidae; Phasianinae; Gallus	PF01399.22^PCI^PCI domain^234-336^E:1.4e-11	.	.	.	GO:0022624^cellular_component^proteasome accessory complex
comp10800_c0_seq1	-0.0779528	-1.32167	1	1	1.58496	3.16993	2.32193	3.45943	comp10800_c0	.	.	.	.	.	.	.	.	.	.	.
comp10801_c0_seq1	0	-1.78824	1	1	-Inf	4.16993	-Inf	1	comp10801_c0	.	.	.	.	.	.	.	.	.	.	.
comp10802_c0_seq1	2.77569	-1.3092	0.249466	1	0	3.45943	3.70044	2	comp10802_c0	.	.	.	.	.	.	.	.	.	.	.
comp10803_c0_seq1	0.213743	6.31036	0.887662	1	9.69	11.5589	10.7211	10.84	comp10803_c0	sp|Q58DA0|PSMD4_BOVIN^Q58DA0^Q:605-703,H:192-224^100%ID^E:-165.252^RecName: Full=26S proteasome non-ATPase regulatory subunit 4;^Eukaryota; Metazoa; Chordata; Craniata; Vertebrata; Euteleostomi; Mammalia; Eutheria; Laurasiatheria; Cetartiodactyla; Ruminantia; Pecora; Bovidae; Bovinae; Bos	.	m.4434	2-1165[+]	sp|Q58DA0|PSMD4_BOVIN^Q58DA0^Q:11-387,H:1-377^90.4509%ID^E:-193.51^RecName: Full=26S proteasome non-ATPase regulatory subunit 4;^Eukaryota; Metazoa; Chordata; Craniata; Vertebrata; Euteleostomi; Mammalia; Eutheria; Laurasiatheria; Cetartiodactyla; Ruminantia; Pecora; Bovidae; Bovinae; Bos	PF13519.1^VWA_2^von Willebrand factor type A domain^16-173^E:4.3e-12`PF04056.9^Ssl1^Ssl1-like^20-155^E:8.3e-06`PF02809.15^UIM^Ubiquitin interaction motif^221-237^E:0.00072`PF02809.15^UIM^Ubiquitin interaction motif^265-271^E:10000`PF02809.15^UIM^Ubiquitin interaction motif^291-308^E:1.9e-05	.	.	COG5148^26S proteasome regulatory complex, subunit RPN10/PSMD4	GO:0022624^cellular_component^proteasome accessory complex
comp10804_c0_seq1	0.294132	-0.629978	0.935655	1	2.58496	4.39232	3.70044	3.45943	comp10804_c0	.	.	.	.	.	.	.	.	.	.	.
comp10805_c0_seq1	-2.17803	-0.330443	0.283709	1	4.70044	4.08746	3.32193	2.32193	comp10805_c0	.	.	.	.	.	.	.	.	.	.	.
comp10807_c0_seq1	0.717353	-1.81747	1	1	0	3	1.58496	2.58496	comp10807_c0	.	.	.	.	.	.	.	.	.	.	.
comp10808_c0_seq1	0.0562995	-1.40028	1	1	2.58496	2	3.45943	2	comp10808_c0	.	.	.	.	.	.	.	.	.	.	.
comp10809_c0_seq1	-0.7705	-1.56814	0.769801	1	1	3.45943	1	3	comp10809_c0	.	.	.	.	.	.	.	.	.	.	.
comp1081_c0_seq1	5.01568	-1.62642	0.336892	1	-Inf	4.08746	2.32193	0	comp1081_c0	.	.	.	.	.	.	.	.	.	.	.
comp10810_c0_seq1	5.99321	-1.45728	0.155461	1	-Inf	3.70044	3.32193	1.58496	comp10810_c0	.	.	.	.	.	.	.	.	.	.	.
comp10811_c0_seq1	0.175216	-1.78665	1	1	1	3.58496	2	0	comp10811_c0	.	.	.	.	.	.	.	.	.	.	.
comp10812_c0_seq1	-0.15118	8.38257	0.933458	1	11.8853	13.7658	12.5515	12.8813	comp10812_c0	sp|Q5E938|EIF1_BOVIN^Q5E938^Q:954-616,H:1-113^90.2655%ID^E:-51.85^RecName: Full=Eukaryotic translation initiation factor 1;^Eukaryota; Metazoa; Chordata; Craniata; Vertebrata; Euteleostomi; Mammalia; Eutheria; Laurasiatheria; Cetartiodactyla; Ruminantia; Pecora; Bovidae; Bovinae; Bos	.	m.4436	613-954[-]	sp|Q5RFF4|EIF1_PONAB^Q5RFF4^Q:1-113,H:1-113^92.9204%ID^E:-56.15^RecName: Full=Eukaryotic translation initiation factor 1;^Eukaryota; Metazoa; Chordata; Craniata; Vertebrata; Euteleostomi; Mammalia; Eutheria; Euarchontoglires; Primates; Haplorrhini; Catarrhini; Hominidae; Pongo	PF01253.17^SUI1^Translation initiation factor SUI1^26-104^E:4e-30	.	.	.	GO:0003743^molecular_function^translation initiation factor activity
comp10813_c0_seq1	-0.79321	-1.32989	0.867711	1	2	3.45943	2	3.16993	comp10813_c0	.	.	.	.	.	.	.	.	.	.	.
comp10814_c0_seq1	-5.8136	-1.32106	0.215943	1	2.32193	2.32193	-Inf	4.08746	comp10814_c0	.	.	.	.	.	.	.	.	.	.	.
comp10816_c0_seq1	3.75915	-2.21856	0.633993	1	-Inf	3	1	1	comp10816_c0	.	.	.	.	.	.	.	.	.	.	.
comp10816_c0_seq2	1.11407	-2.13129	0.772864	1	0	2.80735	2	0	comp10816_c0	.	.	.	.	.	.	.	.	.	.	.
comp10818_c0_seq1	5.67693	-1.56727	0.217972	1	-Inf	3.16993	3	2.58496	comp10818_c0	.	.	.	.	.	.	.	.	.	.	.
comp10819_c0_seq1	1.03502	-1.09717	0.722571	1	1.58496	3.32193	3.45943	3.32193	comp10819_c0	.	.	.	.	.	.	.	.	.	.	.
comp10820_c0_seq1	0.854909	0.236263	0.688047	1	3.32193	5	5	4.58496	comp10820_c0	.	.	.	.	.	.	.	.	.	.	.
comp10821_c0_seq1	0.958666	-1.38563	0.867852	1	1	3.45943	2.80735	2.80735	comp10821_c0	.	.	.	.	.	.	.	.	.	.	.
comp10823_c0_seq1	0.169364	5.60517	0.911409	1	8.77149	11.1286	9.75822	10.1948	comp10823_c0	sp|Q9NY12|GAR1_HUMAN^Q9NY12^Q:505-849,H:52-166^82.6087%ID^E:-52.12^RecName: Full=H/ACA ribonucleoprotein complex subunit 1;^Eukaryota; Metazoa; Chordata; Craniata; Vertebrata; Euteleostomi; Mammalia; Eutheria; Euarchontoglires; Primates; Haplorrhini; Catarrhini; Hominidae; Homo	.	.	.	.	.	.	.	COG3277^RNA-binding protein involved in rRNA processing	GO:0031429^cellular_component^box H/ACA snoRNP complex`GO:0015030^cellular_component^Cajal body`GO:0005261^molecular_function^cation channel activity`GO:0009982^molecular_function^pseudouridine synthase activity`GO:0030515^molecular_function^snoRNA binding`GO:0006364^biological_process^rRNA processing`GO:0031120^biological_process^snRNA pseudouridine synthesis	.
comp10824_c0_seq1	0.583298	-1.57577	0.891568	1	1.58496	2.58496	3	2.32193	comp10824_c0	.	.	.	.	.	.	.	.	.	.	.
comp10825_c0_seq1	-0.542336	-1.26883	0.799865	1	2.32193	3.16993	2.58496	3.16993	comp10825_c0	.	.	.	.	.	.	.	.	.	.	.
comp10826_c0_seq1	4.70486	-1.58838	0.444874	1	-Inf	3.58496	2	2.80735	comp10826_c0	sp|P52742|ZN135_HUMAN^P52742^Q:6-242,H:300-378^58.2278%ID^E:-22.17^RecName: Full=Zinc finger protein 135;^Eukaryota; Metazoa; Chordata; Craniata; Vertebrata; Euteleostomi; Mammalia; Eutheria; Euarchontoglires; Primates; Haplorrhini; Catarrhini; Hominidae; Homo	.	.	.	.	.	.	.	COG5048^FOG: Zn-finger	GO:0005634^cellular_component^nucleus`GO:0003677^molecular_function^DNA binding`GO:0046872^molecular_function^metal ion binding`GO:0003700^molecular_function^sequence-specific DNA binding transcription factor activity`GO:0008270^molecular_function^zinc ion binding`GO:0007010^biological_process^cytoskeleton organization`GO:0022604^biological_process^regulation of cell morphogenesis`GO:0006351^biol…	.
comp10827_c0_seq1	0.679762	6.32391	0.653799	1	8.9571	12.7381	10.4543	8.90087	comp10827_c0	sp|P14018|CLUS_COTJA^P14018^Q:164-784,H:11-217^58.9372%ID^E:-123.911^RecName: Full=Clusterin;^Eukaryota; Metazoa; Chordata; Craniata; Vertebrata; Euteleostomi; Archosauria; Dinosauria; Saurischia; Theropoda; Coelurosauria; Aves; Neognathae; Galliformes; Phasianidae; Perdicinae; Coturnix	.	m.4440	137-1501[+]	sp|P14018|CLUS_COTJA^P14018^Q:277-447,H:273-446^58.6207%ID^E:-125.08^RecName: Full=Clusterin;^Eukaryota; Metazoa; Chordata; Craniata; Vertebrata; Euteleostomi; Archosauria; Dinosauria; Saurischia; Theropoda; Coelurosauria; Aves; Neognathae; Galliformes; Phasianidae; Perdicinae; Coturnix	PF01093.12^Clusterin^Clusterin^24-448^E:1.4e-156	sigP:1^19^0.833^YES	.	.	GO:0042583^cellular_component^chromaffin granule`GO:0005829^cellular_component^cytosol`GO:0005783^cellular_component^endoplasmic reticulum`GO:0005576^cellular_component^extracellular region`GO:0031966^cellular_component^mitochondrial membrane`GO:0005634^cellular_component^nucleus`GO:0008219^biological_process^cell death
comp10828_c0_seq1	-1.94529	-1.30766	0.415122	1	3.16993	3.58496	2	1.58496	comp10828_c0	sp|P10401|POLY_DROME^P10401^Q:181-2,H:253-312^38.3333%ID^E:-4.2^RecName: Full=Retrovirus-related Pol polyprotein from transposon gypsy;^Eukaryota; Metazoa; Ecdysozoa; Arthropoda; Hexapoda; Insecta; Pterygota; Neoptera; Endopterygota; Diptera; Brachycera; Muscomorpha; Ephydroidea; Drosophilidae; Drosophila; Sophophora	.	.	.	.	.	.	.	.	GO:0004519^molecular_function^endonuclease activity`GO:0003723^molecular_function^RNA binding`GO:0003964^molecular_function^RNA-directed DNA polymerase activity`GO:0015074^biological_process^DNA integration`GO:0090305^biological_process^nucleic acid phosphodiester bond hydrolysis`GO:0006278^biological_process^RNA-dependent DNA replication	.
comp1083_c0_seq1	0.754394	-1.85662	0.762449	1	2	-Inf	3.58496	-Inf	comp1083_c0	sp|Q4R6V2|TCPE_MACFA^Q4R6V2^Q:1-222,H:175-248^89.1892%ID^E:-31.55^RecName: Full=T-complex protein 1 subunit epsilon;^Eukaryota; Metazoa; Chordata; Craniata; Vertebrata; Euteleostomi; Mammalia; Eutheria; Euarchontoglires; Primates; Haplorrhini; Catarrhini; Cercopithecidae; Cercopithecinae; Macaca	.	.	.	.	.	.	.	.	GO:0005815^cellular_component^microtubule organizing center`GO:0005524^molecular_function^ATP binding`GO:0006457^biological_process^protein folding	.
comp10831_c0_seq1	-0.00986995	-0.831106	1	1	3	3.80735	3.80735	2.58496	comp10831_c0	.	.	.	.	.	.	.	.	.	.	.
comp10832_c0_seq1	-6.27883	-0.182345	0.0227254	0.560834	5.67243	1.58496	0	-Inf	comp10832_c0	.	.	.	.	.	.	.	.	.	.	.
comp10833_c0_seq1	-0.11991	6.84276	0.938674	1	10.3298	12.3304	11.0272	11.2161	comp10833_c0	sp|P49256|LMAN2_CANFA^P49256^Q:310-1254,H:42-356^85.0794%ID^E:-163.39^RecName: Full=Vesicular integral-membrane protein VIP36;^Eukaryota; Metazoa; Chordata; Craniata; Vertebrata; Euteleostomi; Mammalia; Eutheria; Laurasiatheria; Carnivora; Caniformia; Canidae; Canis	.	m.4441	253-1257[+]	sp|P49256|LMAN2_CANFA^P49256^Q:11-334,H:33-356^85.1852%ID^E:-168.55^RecName: Full=Vesicular integral-membrane protein VIP36;^Eukaryota; Metazoa; Chordata; Craniata; Vertebrata; Euteleostomi; Mammalia; Eutheria; Laurasiatheria; Carnivora; Caniformia; Canidae; Canis	PF03388.8^Lectin_leg-like^Legume-like lectin family^31-255^E:2.4e-95	sigP:1^22^0.927^YES	ExpAA=25.33^PredHel=1^Topology=o301-323i	.	GO:0000139^cellular_component^Golgi membrane`GO:0016021^cellular_component^integral to membrane`GO:0046872^molecular_function^metal ion binding`GO:0015031^biological_process^protein transport
comp10834_c0_seq1	-0.00175514	0.687484	1	1	4.64386	4.64386	5.45943	5.04439	comp10834_c0	.	.	.	.	.	.	.	.	.	.	.
comp10835_c0_seq1	0.477747	3.27948	0.795028	1	6.62936	8.86728	7.92481	6.9542	comp10835_c0	sp|P24799|GNAS_XENLA^P24799^Q:2381-1245,H:1-379^94.723%ID^E:-211.44^RecName: Full=Guanine nucleotide-binding protein G(s) subunit alpha;^Eukaryota; Metazoa; Chordata; Craniata; Vertebrata; Euteleostomi; Amphibia; Batrachia; Anura; Pipoidea; Pipidae; Xenopodinae; Xenopus; Xenopus	.	m.4442	1242-2426[-]	sp|P24799|GNAS_XENLA^P24799^Q:16-394,H:1-379^94.723%ID^E:-211.82^RecName: Full=Guanine nucleotide-binding protein G(s) subunit alpha;^Eukaryota; Metazoa; Chordata; Craniata; Vertebrata; Euteleostomi; Amphibia; Batrachia; Anura; Pipoidea; Pipidae; Xenopodinae; Xenopus; Xenopus	PF00503.15^G-alpha^G-protein alpha subunit^23-393^E:2e-126`PF00025.16^Arf^ADP-ribosylation factor family^205-300^E:8.8e-14	.	.	.	GO:0005886^cellular_component^plasma membrane`GO:0005525^molecular_function^GTP binding`GO:0046872^molecular_function^metal ion binding`GO:0004871^molecular_function^signal transducer activity`GO:0007186^biological_process^G-protein coupled receptor signaling pathway
comp10835_c0_seq2	1.04322	3.80296	0.552164	1	6.76818	8.76487	8.62936	8.38802	comp10835_c0	sp|P24799|GNAS_XENLA^P24799^Q:2616-1480,H:1-379^94.723%ID^E:-211.39^RecName: Full=Guanine nucleotide-binding protein G(s) subunit alpha;^Eukaryota; Metazoa; Chordata; Craniata; Vertebrata; Euteleostomi; Amphibia; Batrachia; Anura; Pipoidea; Pipidae; Xenopodinae; Xenopus; Xenopus	.	m.4444	1477-2661[-]	sp|P24799|GNAS_XENLA^P24799^Q:16-394,H:1-379^94.723%ID^E:-211.82^RecName: Full=Guanine nucleotide-binding protein G(s) subunit alpha;^Eukaryota; Metazoa; Chordata; Craniata; Vertebrata; Euteleostomi; Amphibia; Batrachia; Anura; Pipoidea; Pipidae; Xenopodinae; Xenopus; Xenopus	PF00503.15^G-alpha^G-protein alpha subunit^23-393^E:2e-126`PF00025.16^Arf^ADP-ribosylation factor family^205-300^E:8.8e-14	.	.	.	GO:0005886^cellular_component^plasma membrane`GO:0005525^molecular_function^GTP binding`GO:0046872^molecular_function^metal ion binding`GO:0004871^molecular_function^signal transducer activity`GO:0007186^biological_process^G-protein coupled receptor signaling pathway
comp10837_c0_seq1	-0.785489	-1.55939	0.832566	1	1.58496	4.08746	1.58496	0	comp10837_c0	.	.	.	.	.	.	.	.	.	.	.
comp10839_c0_seq1	-0.328431	5.90858	0.826912	1	9.71081	11.0795	10.1997	10.2228	comp10839_c0	sp|Q1H5H1|SELT_RAT^Q1H5H1^Q:1189-662,H:20-195^86.3636%ID^E:-85.25^RecName: Full=Selenoprotein T;^Eukaryota; Metazoa; Chordata; Craniata; Vertebrata; Euteleostomi; Mammalia; Eutheria; Euarchontoglires; Glires; Rodentia; Sciurognathi; Muroidea; Muridae; Murinae; Rattus	.	m.4446	659-1072[-]	sp|Q1H5H1|SELT_RAT^Q1H5H1^Q:1-137,H:59-195^90.5109%ID^E:-70.41^RecName: Full=Selenoprotein T;^Eukaryota; Metazoa; Chordata; Craniata; Vertebrata; Euteleostomi; Mammalia; Eutheria; Euarchontoglires; Glires; Rodentia; Sciurognathi; Muroidea; Muridae; Murinae; Rattus	PF10262.4^Rdx^Rdx family^3-122^E:2.7e-13	.	ExpAA=31.14^PredHel=2^Topology=i27-44o59-81i	NOG262496^Ets homologous factor	GO:0008430^molecular_function^selenium binding`GO:0045454^biological_process^cell redox homeostasis
comp1084_c0_seq1	-1.36749	-1.16516	0.603826	1	2.58496	3.58496	2	3.32193	comp1084_c0	.	.	.	.	.	.	.	.	.	.	.
comp10841_c0_seq1	1.27285	-1.04058	0.600943	1	1.58496	3.58496	3.70044	3	comp10841_c0	.	.	.	.	.	.	.	.	.	.	.
comp10842_c0_seq1	0.0301205	-1.39796	1	1	2.32193	1.58496	3.16993	3	comp10842_c0	.	.	.	.	.	.	.	.	.	.	.
comp10845_c0_seq1	5.84372	-1.56439	0.182832	1	-Inf	3.90689	3.16993	-Inf	comp10845_c0	.	.	.	.	.	.	.	.	.	.	.
comp10846_c0_seq1	0.0301205	-1.31148	1	1	2.32193	3.16993	3.16993	2.32193	comp10846_c0	.	.	.	.	.	.	.	.	.	.	.
comp10847_c0_seq1	-0.614747	-1.31968	0.848639	1	2.80735	2.58496	3	2.58496	comp10847_c0	sp|P59046|NAL12_HUMAN^P59046^Q:2-166,H:542-598^43.8596%ID^E:-5.13^RecName: Full=NACHT, LRR and PYD domains-containing protein 12;^Eukaryota; Metazoa; Chordata; Craniata; Vertebrata; Euteleostomi; Mammalia; Eutheria; Euarchontoglires; Primates; Haplorrhini; Catarrhini; Hominidae; Homo	.	.	.	.	.	.	.	NOG82860^NLR family, pyrin domain containing protein	GO:0005737^cellular_component^cytoplasm`GO:0005524^molecular_function^ATP binding`GO:0008656^molecular_function^cysteine-type endopeptidase activator activity involved in apoptotic process`GO:0043124^biological_process^negative regulation of I-kappaB kinase/NF-kappaB cascade`GO:0050728^biological_process^negative regulation of inflammatory response`GO:0050711^biological_process^negative regulatio…	.
comp10848_c0_seq1	-0.348071	4.00157	0.841302	1	7.66534	9.30606	8.13443	8.43463	comp10848_c0	sp|O08583|THOC4_MOUSE^O08583^Q:108-155,H:1-16^87.5%ID^E:-57.0141^RecName: Full=THO complex subunit 4;^Eukaryota; Metazoa; Chordata; Craniata; Vertebrata; Euteleostomi; Mammalia; Eutheria; Euarchontoglires; Glires; Rodentia; Sciurognathi; Muroidea; Muridae; Murinae; Mus; Mus	.	m.4448	1857-2366[+]	sp|B5FXN8|THOC4_TAEGU^B5FXN8^Q:6-165,H:76-228^82.5%ID^E:-68.33^RecName: Full=THO complex subunit 4;^Eukaryota; Metazoa; Chordata; Craniata; Vertebrata; Euteleostomi; Archosauria; Dinosauria; Saurischia; Theropoda; Coelurosauria; Aves; Neognathae; Passeriformes; Passeroidea; Estrildidae; Estrildinae; Taeniopygia	PF00076.17^RRM_1^RNA recognition motif. (a.k.a. RRM, RBD, or RNP domain)^39-107^E:5.5e-14`PF14259.1^RRM_6^RNA recognition motif (a.k.a. RRM, RBD, or RNP domain)^39-105^E:4e-12`PF13893.1^RRM_5^RNA recognition motif. (a.k.a. RRM, RBD, or RNP domain)^54-110^E:1.7e-06	.	.	.	GO:0005737^cellular_component^cytoplasm`GO:0016607^cellular_component^nuclear speck`GO:0000166^molecular_function^nucleotide binding`GO:0003723^molecular_function^RNA binding`GO:0006397^biological_process^mRNA processing`GO:0051028^biological_process^mRNA transport`GO:0008380^biological_process^RNA splicing
comp10848_c0_seq2	0.394527	5.11565	0.798368	1	8.11894	10.6653	9.33092	9.71939	comp10848_c0	sp|O08583|THOC4_MOUSE^O08583^Q:108-155,H:1-16^87.5%ID^E:-62.1525^RecName: Full=THO complex subunit 4;^Eukaryota; Metazoa; Chordata; Craniata; Vertebrata; Euteleostomi; Mammalia; Eutheria; Euarchontoglires; Glires; Rodentia; Sciurognathi; Muroidea; Muridae; Murinae; Mus; Mus	.	m.4449	108-851[+]	sp|B5FXN8|THOC4_TAEGU^B5FXN8^Q:1-243,H:1-228^75.5102%ID^E:-93.27^RecName: Full=THO complex subunit 4;^Eukaryota; Metazoa; Chordata; Craniata; Vertebrata; Euteleostomi; Archosauria; Dinosauria; Saurischia; Theropoda; Coelurosauria; Aves; Neognathae; Passeriformes; Passeroidea; Estrildidae; Estrildinae; Taeniopygia	PF00076.17^RRM_1^RNA recognition motif. (a.k.a. RRM, RBD, or RNP domain)^117-185^E:1.2e-13`PF14259.1^RRM_6^RNA recognition motif (a.k.a. RRM, RBD, or RNP domain)^117-183^E:8.7e-12`PF13893.1^RRM_5^RNA recognition motif. (a.k.a. RRM, RBD, or RNP domain)^132-188^E:3.4e-06	.	.	.	GO:0005737^cellular_component^cytoplasm`GO:0016607^cellular_component^nuclear speck`GO:0000166^molecular_function^nucleotide binding`GO:0003723^molecular_function^RNA binding`GO:0006397^biological_process^mRNA processing`GO:0051028^biological_process^mRNA transport`GO:0008380^biological_process^RNA splicing
comp1085_c0_seq1	0.74162	-1.72436	0.868931	1	1	3.45943	2.58496	0	comp1085_c0	.	.	.	.	.	.	.	.	.	.	.
comp10851_c0_seq1	0	-1.74962	1	1	-Inf	4.32193	-Inf	0	comp10851_c0	.	.	.	.	.	.	.	.	.	.	.
comp10852_c0_seq1	5.84372	-1.47878	0.182076	1	-Inf	4	3.16993	0	comp10852_c0	.	.	.	.	.	.	.	.	.	.	.
comp10854_c0_seq1	0.178862	-1.18872	1	1	2	3	3	3.45943	comp10854_c0	.	.	.	.	.	.	.	.	.	.	.
comp10856_c0_seq1	0.583298	-1.79926	0.892254	1	1.58496	2.80735	3	-Inf	comp10856_c0	.	.	.	.	.	.	.	.	.	.	.
comp10857_c0_seq1	-2.25767	5.43276	0.150197	1	10.2609	10.3554	8.82018	8.38802	comp10857_c0	sp|Q863G0|COX8B_ATEBE^Q863G0^Q:314-111,H:1-68^45.5882%ID^E:-9.36^RecName: Full=Cytochrome c oxidase subunit 8B, mitochondrial;^Eukaryota; Metazoa; Chordata; Craniata; Vertebrata; Euteleostomi; Mammalia; Eutheria; Euarchontoglires; Primates; Haplorrhini; Platyrrhini; Atelidae; Atelinae; Ateles	.	.	.	.	.	.	.	.	GO:0016021^cellular_component^integral to membrane`GO:0005743^cellular_component^mitochondrial inner membrane`GO:0004129^molecular_function^cytochrome-c oxidase activity	.
comp10858_c0_seq1	1.59901	-1.19776	0.603995	1	1	3.70044	3.45943	2.58496	comp10858_c0	.	.	.	.	.	.	.	.	.	.	.
comp10859_c0_seq1	0.868414	-0.603036	0.698254	1	2	4.24793	3.70044	4	comp10859_c0	.	.	m.4451	2-343[-]	.	.	.	.	.	.
comp1086_c0_seq1	0.74162	-1.35751	0.86778	1	1	4.24793	2.58496	1	comp1086_c0	sp|Q0V9S3|CTIF_XENTR^Q0V9S3^Q:377-276,H:541-574^44.1176%ID^E:-0.25^RecName: Full=CBP80/20-dependent translation initiation factor;^Eukaryota; Metazoa; Chordata; Craniata; Vertebrata; Euteleostomi; Amphibia; Batrachia; Anura; Pipoidea; Pipidae; Xenopodinae; Xenopus; Silurana	.	.	.	.	.	.	.	.	GO:0048471^cellular_component^perinuclear region of cytoplasm`GO:0003677^molecular_function^DNA binding`GO:0003723^molecular_function^RNA binding`GO:0000184^biological_process^nuclear-transcribed mRNA catabolic process, nonsense-mediated decay`GO:0006446^biological_process^regulation of translational initiation	.
comp10860_c0_seq1	-0.274281	-0.354402	0.912624	1	3.45943	3.90689	4	4.16993	comp10860_c0	.	.	.	.	.	.	.	.	.	.	.
comp10863_c0_seq1	1.68047	-1.56481	0.508171	1	0	4	2.58496	0	comp10863_c0	.	.	.	.	.	.	.	.	.	.	.
comp10864_c0_seq1	6.25247	-1.39214	0.134468	1	-Inf	4	3.58496	-Inf	comp10864_c0	.	.	.	.	.	.	.	.	.	.	.
comp10865_c0_seq1	-0.388775	-1.8319	1	1	1.58496	2	2	2.58496	comp10865_c0	.	.	.	.	.	.	.	.	.	.	.
comp10866_c0_seq1	0.750086	-1.46378	0.800658	1	1.58496	2	3.16993	3	comp10866_c0	.	.	.	.	.	.	.	.	.	.	.
comp10867_c0_seq1	-8.71715	-0.683467	0.0133477	0.472133	5.24793	-Inf	-Inf	-Inf	comp10867_c0	sp|P38572|UPK1A_BOVIN^P38572^Q:9-332,H:90-196^55.5556%ID^E:-32.49^RecName: Full=Uroplakin-1a;^Eukaryota; Metazoa; Chordata; Craniata; Vertebrata; Euteleostomi; Mammalia; Eutheria; Laurasiatheria; Cetartiodactyla; Ruminantia; Pecora; Bovidae; Bovinae; Bos	.	.	.	.	.	.	.	NOG246602^Transport-Associated protein	GO:0005783^cellular_component^endoplasmic reticulum`GO:0016021^cellular_component^integral to membrane`GO:0005886^cellular_component^plasma membrane`GO:0048029^molecular_function^monosaccharide binding`GO:0042803^molecular_function^protein homodimerization activity`GO:0030855^biological_process^epithelial cell differentiation`GO:0051259^biological_process^protein oligomerization	.
comp10868_c0_seq1	-1.36749	-1.39745	0.605323	1	2.58496	3.32193	2	2.58496	comp10868_c0	.	.	.	.	.	.	.	.	.	.	.
comp10869_c0_seq1	2.2284	6.77353	0.165462	1	8.99435	12.4414	12.0403	9.88264	comp10869_c0	sp|P10784|HBA2_TRICR^P10784^Q:69-488,H:2-141^71.4286%ID^E:-53.06^RecName: Full=Hemoglobin subunit alpha-2;^Eukaryota; Metazoa; Chordata; Craniata; Vertebrata; Euteleostomi; Amphibia; Batrachia; Caudata; Salamandroidea; Salamandridae; Triturus	.	m.4454	60-491[+]	sp|P10784|HBA2_TRICR^P10784^Q:4-143,H:2-141^71.4286%ID^E:-53.45^RecName: Full=Hemoglobin subunit alpha-2;^Eukaryota; Metazoa; Chordata; Craniata; Vertebrata; Euteleostomi; Amphibia; Batrachia; Caudata; Salamandroidea; Salamandridae; Triturus	PF00042.17^Globin^Globin^8-107^E:8.6e-25	.	.	.	GO:0005833^cellular_component^hemoglobin complex`GO:0020037^molecular_function^heme binding`GO:0005506^molecular_function^iron ion binding`GO:0019825^molecular_function^oxygen binding`GO:0005344^molecular_function^oxygen transporter activity
comp10870_c0_seq1	1.89752	-1.69142	0.509442	1	0	2.58496	2.80735	2.58496	comp10870_c0	.	.	.	.	.	.	.	.	.	.	.
comp10871_c0_seq1	-1.12378	-1.02699	0.637402	1	3.32193	3.45943	3	2.58496	comp10871_c0	sp|O75385|ULK1_HUMAN^O75385^Q:266-3,H:809-897^64.8352%ID^E:-24.15^RecName: Full=Serine/threonine-protein kinase ULK1;^Eukaryota; Metazoa; Chordata; Craniata; Vertebrata; Euteleostomi; Mammalia; Eutheria; Euarchontoglires; Primates; Haplorrhini; Catarrhini; Hominidae; Homo	.	m.4455	3-341[-]	sp|O75385|ULK1_HUMAN^O75385^Q:26-113,H:809-897^64.8352%ID^E:-24.14^RecName: Full=Serine/threonine-protein kinase ULK1;^Eukaryota; Metazoa; Chordata; Craniata; Vertebrata; Euteleostomi; Mammalia; Eutheria; Euarchontoglires; Primates; Haplorrhini; Catarrhini; Hominidae; Homo	.	.	.	COG0515^Serine/threonine protein kinase	GO:0005776^cellular_component^autophagic vacuole`GO:0030659^cellular_component^cytoplasmic vesicle membrane`GO:0005829^cellular_component^cytosol`GO:0043005^cellular_component^neuron projection`GO:0043025^cellular_component^neuronal cell body`GO:0034045^cellular_component^pre-autophagosomal structure membrane`GO:0070969^cellular_component^ULK1-ATG13-FIP200 complex`GO:0005524^molecular_function^AT…
comp10872_c0_seq1	0.315052	-1.26361	1	1	2.32193	3	3.45943	2.32193	comp10872_c0	.	.	.	.	.	.	.	.	.	.	.
comp10873_c0_seq1	7.24297	-0.764865	0.0543371	0.817876	-Inf	3.32193	4.58496	3.45943	comp10873_c0	.	.	m.4456	3-548[+]	.	.	.	.	.	.
comp10873_c0_seq2	-5.09364	-2.13419	0.342502	1	1.58496	3.16993	-Inf	0	comp10873_c0	.	.	m.4457	3-389[+]	.	.	.	.	.	.
comp10874_c0_seq1	-0.163027	-0.765115	1	1	2.80735	4.08746	3.45943	3.32193	comp10874_c0	.	.	.	.	.	.	.	.	.	.	.
comp10875_c0_seq1	0.175216	-1.54608	1	1	1	3	2	3.16993	comp10875_c0	.	.	.	.	.	.	.	.	.	.	.
comp10876_c0_seq1	0.74162	-1.77161	0.869106	1	1	3.32193	2.58496	0	comp10876_c0	.	.	.	.	.	.	.	.	.	.	.
comp10877_c0_seq1	-0.649369	8.12641	0.712344	1	11.9278	13.35	12.0957	12.649	comp10877_c0	sp|Q8SX83|SPEN_DROME^Q8SX83^Q:1431-1195,H:556-634^41.7722%ID^E:-9.23^RecName: Full=Protein split ends;^Eukaryota; Metazoa; Ecdysozoa; Arthropoda; Hexapoda; Insecta; Pterygota; Neoptera; Endopterygota; Diptera; Brachycera; Muscomorpha; Ephydroidea; Drosophilidae; Drosophila; Sophophora	.	m.4458	139-2316[-]	sp|Q7M732|RTL1_MOUSE^Q7M732^Q:572-717,H:1293-1434^44.2177%ID^E:-20.74^RecName: Full=Retrotransposon-like protein 1;^Eukaryota; Metazoa; Chordata; Craniata; Vertebrata; Euteleostomi; Mammalia; Eutheria; Euarchontoglires; Glires; Rodentia; Sciurognathi; Muroidea; Muridae; Murinae; Mus; Mus	PF00076.17^RRM_1^RNA recognition motif. (a.k.a. RRM, RBD, or RNP domain)^397-461^E:7.7e-16`PF14259.1^RRM_6^RNA recognition motif (a.k.a. RRM, RBD, or RNP domain)^397-462^E:4.1e-12`PF13893.1^RRM_5^RNA recognition motif. (a.k.a. RRM, RBD, or RNP domain)^412-460^E:1.4e-05	.	.	COG2801^Transposase and inactivated derivatives	GO:0016021^cellular_component^integral to membrane`GO:0007275^biological_process^multicellular organismal development
comp10879_c0_seq1	2.25293	-1.69226	0.369621	1	0	2.58496	3.16993	2	comp10879_c0	.	.	.	.	.	.	.	.	.	.	.
comp10880_c0_seq1	0.495139	-0.762716	0.826871	1	2	3.80735	3.32193	4.08746	comp10880_c0	sp|Q8QGX4|PRKDC_CHICK^Q8QGX4^Q:397-2,H:110-241^71.2121%ID^E:-48.85^RecName: Full=DNA-dependent protein kinase catalytic subunit;^Eukaryota; Metazoa; Chordata; Craniata; Vertebrata; Euteleostomi; Archosauria; Dinosauria; Saurischia; Theropoda; Coelurosauria; Aves; Neognathae; Galliformes; Phasianidae; Phasianinae; Gallus	.	m.4461	2-400[-]	sp|Q8QGX4|PRKDC_CHICK^Q8QGX4^Q:2-133,H:110-241^71.2121%ID^E:-48.85^RecName: Full=DNA-dependent protein kinase catalytic subunit;^Eukaryota; Metazoa; Chordata; Craniata; Vertebrata; Euteleostomi; Archosauria; Dinosauria; Saurischia; Theropoda; Coelurosauria; Aves; Neognathae; Galliformes; Phasianidae; Phasianinae; Gallus	.	.	.	COG5032^Phosphatidylinositol kinase and protein kinases of the PI-3 kinase family	GO:0070419^cellular_component^nonhomologous end joining complex`GO:0005730^cellular_component^nucleolus`GO:0005654^cellular_component^nucleoplasm`GO:0005524^molecular_function^ATP binding`GO:0003677^molecular_function^DNA binding`GO:0004677^molecular_function^DNA-dependent protein kinase activity`GO:0000724^biological_process^double-strand break repair via homologous recombination`GO:0006303^biol…
comp10882_c0_seq1	0.749758	5.71435	0.617643	1	8.47168	10.9344	10.0389	10.66	comp10882_c0	sp|Q86V81|THOC4_HUMAN^Q86V81^Q:2448-2356,H:227-257^87.0968%ID^E:-5.95^RecName: Full=THO complex subunit 4;^Eukaryota; Metazoa; Chordata; Craniata; Vertebrata; Euteleostomi; Mammalia; Eutheria; Euarchontoglires; Primates; Haplorrhini; Catarrhini; Hominidae; Homo	.	m.4462	858-1340[+]	.	.	.	.	.	.
comp10883_c0_seq1	0.0301205	-1.32468	1	1	2.32193	2.32193	3.16993	3	comp10883_c0	.	.	.	.	.	.	.	.	.	.	.
comp10884_c0_seq1	-0.526764	1.87459	0.804747	1	5.75489	7.02237	6.04439	6.12928	comp10884_c0	sp|Q76N33|STALP_MOUSE^Q76N33^Q:1199-3,H:1-399^78.9474%ID^E:-182.4^RecName: Full=AMSH-like protease;^Eukaryota; Metazoa; Chordata; Craniata; Vertebrata; Euteleostomi; Mammalia; Eutheria; Euarchontoglires; Glires; Rodentia; Sciurognathi; Muroidea; Muridae; Murinae; Mus; Mus	.	m.4463	3-1253[-]	sp|Q76N33|STALP_MOUSE^Q76N33^Q:19-417,H:1-399^78.9474%ID^E:-182.57^RecName: Full=AMSH-like protease;^Eukaryota; Metazoa; Chordata; Craniata; Vertebrata; Euteleostomi; Mammalia; Eutheria; Euarchontoglires; Glires; Rodentia; Sciurognathi; Muroidea; Muridae; Murinae; Mus; Mus	PF01398.16^JAB^JAB1/Mov34/MPN/PAD-1 ubiquitin protease^285-390^E:1.1e-17`PF14464.1^Prok-JAB^Prokaryotic homologs of the JAB domain^299-393^E:2.1e-08	.	.	COG1310^Predicted metal-dependent protease of the PAD1/JAB1 superfamily	GO:0046872^molecular_function^metal ion binding`GO:0008237^molecular_function^metallopeptidase activity`GO:0006508^biological_process^proteolysis
comp10885_c0_seq1	-0.228632	-1.51869	1	1	2.58496	0	3.16993	2.58496	comp10885_c0	.	.	.	.	.	.	.	.	.	.	.
comp10886_c0_seq1	-1.33449	-1.73239	0.617676	1	1.58496	3.70044	1	1	comp10886_c0	.	.	.	.	.	.	.	.	.	.	.
comp10887_c0_seq1	-0.332374	6.46313	0.826744	1	10.2981	11.3734	10.783	10.9556	comp10887_c0	sp|P47974|TISD_HUMAN^P47974^Q:176-250,H:470-494^84%ID^E:-4.13865^RecName: Full=Zinc finger protein 36, C3H1 type-like 2;^Eukaryota; Metazoa; Chordata; Craniata; Vertebrata; Euteleostomi; Mammalia; Eutheria; Euarchontoglires; Primates; Haplorrhini; Catarrhini; Hominidae; Homo	.	.	.	.	.	.	.	COG5063^CCCH-type Zn-finger protein	GO:0005737^cellular_component^cytoplasm`GO:0005634^cellular_component^nucleus`GO:0003677^molecular_function^DNA binding`GO:0046872^molecular_function^metal ion binding`GO:0003723^molecular_function^RNA binding`GO:0003700^molecular_function^sequence-specific DNA binding transcription factor activity`GO:0008270^molecular_function^zinc ion binding`GO:0008283^biological_process^cell proliferation`GO:…	.
comp10888_c0_seq1	-0.521499	-0.351939	0.826452	1	3.16993	5.39232	3.45943	2.32193	comp10888_c0	.	.	m.4464	86-526[-]	sp|P22793|TRHY_SHEEP^P22793^Q:85-145,H:607-674^30.8824%ID^E:-0.19^RecName: Full=Trichohyalin;^Eukaryota; Metazoa; Chordata; Craniata; Vertebrata; Euteleostomi; Mammalia; Eutheria; Laurasiatheria; Cetartiodactyla; Ruminantia; Pecora; Bovidae; Caprinae; Ovis	.	.	.	.	GO:0005509^molecular_function^calcium ion binding`GO:0031424^biological_process^keratinization
comp1089_c0_seq1	-0.0779528	-1.80609	1	1	1.58496	3	2.32193	1	comp1089_c0	.	.	.	.	.	.	.	.	.	.	.
comp10890_c0_seq1	0.552191	0.59975	0.815051	1	4.08746	5.12928	5.45943	4.85798	comp10890_c0	sp|Q8SPF0|NDUA1_GORGO^Q8SPF0^Q:81-182,H:1-34^67.6471%ID^E:-8.48^RecName: Full=NADH dehydrogenase [ubiquinone] 1 alpha subcomplex subunit 1;^Eukaryota; Metazoa; Chordata; Craniata; Vertebrata; Euteleostomi; Mammalia; Eutheria; Euarchontoglires; Primates; Haplorrhini; Catarrhini; Hominidae; Gorilla	.	.	.	.	.	.	.	.	GO:0016021^cellular_component^integral to membrane`GO:0005743^cellular_component^mitochondrial inner membrane`GO:0070469^cellular_component^respiratory chain`GO:0022900^biological_process^electron transport chain	.
comp10890_c0_seq2	-0.829824	4.58225	0.606816	1	8.40939	10.1573	8.3966	8.73132	comp10890_c0	sp|O35683|NDUA1_MOUSE^O35683^Q:81-290,H:1-70^68.5714%ID^E:-24.95^RecName: Full=NADH dehydrogenase [ubiquinone] 1 alpha subcomplex subunit 1;^Eukaryota; Metazoa; Chordata; Craniata; Vertebrata; Euteleostomi; Mammalia; Eutheria; Euarchontoglires; Glires; Rodentia; Sciurognathi; Muroidea; Muridae; Murinae; Mus; Mus	.	.	.	.	.	.	.	NOG79354^NADH dehydrogenase (ubiquinone) 1 alpha subcomplex	GO:0016021^cellular_component^integral to membrane`GO:0005747^cellular_component^mitochondrial respiratory chain complex I`GO:0005739^cellular_component^mitochondrion`GO:0022900^biological_process^electron transport chain	.
comp10891_c0_seq1	-0.283666	-0.945849	0.946589	1	3.16993	3	3.70044	2.80735	comp10891_c0	sp|Q8TAF7|ZN461_HUMAN^Q8TAF7^Q:2-121,H:433-472^70%ID^E:-9.53^RecName: Full=Zinc finger protein 461;^Eukaryota; Metazoa; Chordata; Craniata; Vertebrata; Euteleostomi; Mammalia; Eutheria; Euarchontoglires; Primates; Haplorrhini; Catarrhini; Hominidae; Homo	.	.	.	.	.	.	.	COG5048^FOG: Zn-finger	GO:0005634^cellular_component^nucleus`GO:0003677^molecular_function^DNA binding`GO:0046872^molecular_function^metal ion binding`GO:0008270^molecular_function^zinc ion binding`GO:0006355^biological_process^regulation of transcription, DNA-dependent`GO:0006351^biological_process^transcription, DNA-dependent	.
comp10892_c0_seq1	-8.2778	-1.09963	0.0204563	0.538182	4.80735	-Inf	-Inf	-Inf	comp10892_c0	sp|Q5RFB6|RPN1_PONAB^Q5RFB6^Q:1-243,H:295-375^85.1852%ID^E:-38.29^RecName: Full=Dolichyl-diphosphooligosaccharide--protein glycosyltransferase subunit 1;^Eukaryota; Metazoa; Chordata; Craniata; Vertebrata; Euteleostomi; Mammalia; Eutheria; Euarchontoglires; Primates; Haplorrhini; Catarrhini; Hominidae; Pongo	.	.	.	.	.	.	.	.	GO:0005789^cellular_component^endoplasmic reticulum membrane`GO:0016021^cellular_component^integral to membrane`GO:0042470^cellular_component^melanosome`GO:0004579^molecular_function^dolichyl-diphosphooligosaccharide-protein glycotransferase activity`GO:0006486^biological_process^protein glycosylation	.
comp10893_c0_seq1	-0.785489	-1.4825	0.832285	1	1.58496	3.70044	1.58496	2.58496	comp10893_c0	.	.	.	.	.	.	.	.	.	.	.
comp10894_c0_seq1	-0.683428	11.6214	0.792332	1	15.7812	16.3559	15.9151	15.8524	comp10894_c0	sp|Q9ZZM3|NU5M_SALSA^Q9ZZM3^Q:1625-1870,H:505-593^43.8202%ID^E:-155.495^RecName: Full=NADH-ubiquinone oxidoreductase chain 5;^Eukaryota; Metazoa; Chordata; Craniata; Vertebrata; Euteleostomi; Actinopterygii; Neopterygii; Teleostei; Euteleostei; Protacanthopterygii; Salmoniformes; Salmonidae; Salmoninae; Salmo	.	.	.	.	.	.	.	.	GO:0016021^cellular_component^integral to membrane`GO:0005743^cellular_component^mitochondrial inner membrane`GO:0070469^cellular_component^respiratory chain`GO:0008137^molecular_function^NADH dehydrogenase (ubiquinone) activity`GO:0042773^biological_process^ATP synthesis coupled electron transport	.
comp10895_c0_seq1	-0.136668	-0.788554	1	1	2.32193	4.58496	3	3.16993	comp10895_c0	.	.	.	.	.	.	.	.	.	.	.
comp10896_c0_seq1	-1.98353	-1.2007	0.418259	1	2.80735	4.16993	1.58496	2	comp10896_c0	sp|Q9D305|THAP2_MOUSE^Q9D305^Q:52-81,H:20-29^60%ID^E:-6.38556^RecName: Full=THAP domain-containing protein 2;^Eukaryota; Metazoa; Chordata; Craniata; Vertebrata; Euteleostomi; Mammalia; Eutheria; Euarchontoglires; Glires; Rodentia; Sciurognathi; Muroidea; Muridae; Murinae; Mus; Mus	.	m.4468	1-384[+]	sp|Q9D305|THAP2_MOUSE^Q9D305^Q:18-39,H:20-41^59.0909%ID^E:-10.2234^RecName: Full=THAP domain-containing protein 2;^Eukaryota; Metazoa; Chordata; Craniata; Vertebrata; Euteleostomi; Mammalia; Eutheria; Euarchontoglires; Glires; Rodentia; Sciurognathi; Muroidea; Muridae; Murinae; Mus; Mus	PF05485.7^THAP^THAP domain^14-87^E:2.6e-18	.	.	NOG81555^THAP domain containing, apoptosis associated protein 2	GO:0005730^cellular_component^nucleolus`GO:0003677^molecular_function^DNA binding`GO:0046872^molecular_function^metal ion binding
comp10899_c0_seq1	1.31408	-1.57449	0.677528	1	1	2.32193	3.16993	2.58496	comp10899_c0	.	.	.	.	.	.	.	.	.	.	.
comp1090_c0_seq1	0.717353	-2.19547	1	1	0	2.58496	1.58496	1	comp1090_c0	.	.	.	.	.	.	.	.	.	.	.
comp10900_c0_seq1	-0.728847	-1.82655	1	1	0	1	0	3.70044	comp10900_c0	.	.	.	.	.	.	.	.	.	.	.
comp10901_c0_seq1	-0.0779528	-1.43778	1	1	1.58496	3.70044	2.32193	2.32193	comp10901_c0	.	.	.	.	.	.	.	.	.	.	.
comp10902_c0_seq1	-0.614747	-1.09576	0.848094	1	2.80735	3	3	3.32193	comp10902_c0	.	.	.	.	.	.	.	.	.	.	.
comp10903_c0_seq1	-0.41496	5.9492	0.781736	1	9.9629	11.06	10.3652	9.88722	comp10903_c0	sp|Q9UL46|PSME2_HUMAN^Q9UL46^Q:353-829,H:81-239^77.9874%ID^E:-66.5538^RecName: Full=Proteasome activator complex subunit 2;^Eukaryota; Metazoa; Chordata; Craniata; Vertebrata; Euteleostomi; Mammalia; Eutheria; Euarchontoglires; Primates; Haplorrhini; Catarrhini; Hominidae; Homo	.	m.4471	98-832[+]	sp|Q63798|PSME2_RAT^Q63798^Q:9-244,H:8-238^69.9153%ID^E:-89.33^RecName: Full=Proteasome activator complex subunit 2;^Eukaryota; Metazoa; Chordata; Craniata; Vertebrata; Euteleostomi; Mammalia; Eutheria; Euarchontoglires; Glires; Rodentia; Sciurognathi; Muroidea; Muridae; Murinae; Rattus	PF02251.13^PA28_alpha^Proteasome activator pa28 alpha subunit^11-73^E:1.3e-23`PF02252.13^PA28_beta^Proteasome activator pa28 beta subunit^95-244^E:1.5e-63	.	.	.	GO:0008537^cellular_component^proteasome activator complex
comp10904_c0_seq1	0.958666	-1.34276	0.867743	1	1	3.45943	2.80735	3	comp10904_c0	sp|Q6YBV0|S36A4_HUMAN^Q6YBV0^Q:151-2,H:16-64^56%ID^E:-9.53^RecName: Full=Proton-coupled amino acid transporter 4;^Eukaryota; Metazoa; Chordata; Craniata; Vertebrata; Euteleostomi; Mammalia; Eutheria; Euarchontoglires; Primates; Haplorrhini; Catarrhini; Hominidae; Homo	.	.	.	.	.	.	.	COG0814^Amino acid permeases	GO:0016021^cellular_component^integral to membrane`GO:0015293^molecular_function^symporter activity`GO:0015808^biological_process^L-alanine transport`GO:0015824^biological_process^proline transport`GO:0015827^biological_process^tryptophan transport	.
comp10906_c0_seq1	-0.00976039	-1.38086	1	1	2	2.58496	2.80735	3.16993	comp10906_c0	.	.	.	.	.	.	.	.	.	.	.
comp10907_c0_seq1	3.75915	-2.14515	0.633475	1	-Inf	3	1	1.58496	comp10907_c0	.	.	.	.	.	.	.	.	.	.	.
comp10908_c0_seq1	-1.58682	-1.54184	0.547405	1	2.80735	2.32193	2	2.58496	comp10908_c0	.	.	.	.	.	.	.	.	.	.	.
comp10910_c0_seq1	-0.278106	5.08703	0.856486	1	8.58496	10.7977	9.12412	9.22641	comp10910_c0	.	.	.	.	.	.	.	.	.	.	.
comp10911_c0_seq1	-3.01571	-0.918088	0.183009	1	4.24793	3	2	2.32193	comp10911_c0	.	.	.	.	.	.	.	.	.	.	.
comp10911_c0_seq2	0.495139	-1.3531	0.827818	1	2	3	3.32193	2.32193	comp10911_c0	.	.	.	.	.	.	.	.	.	.	.
comp10913_c0_seq1	-0.00976039	-1.0314	1	1	2	4.08746	2.80735	3.16993	comp10913_c0	.	.	.	.	.	.	.	.	.	.	.
comp10914_c0_seq1	-1.52945	-0.803169	0.472421	1	3.32193	2.80735	2.58496	4.16993	comp10914_c0	.	.	.	.	.	.	.	.	.	.	.
comp10917_c0_seq1	2.3788	-1.27002	0.354389	1	1	2.58496	4.24793	1	comp10917_c0	.	.	.	.	.	.	.	.	.	.	.
comp10918_c0_seq1	2.52204	-0.501702	0.306988	1	1	4.64386	4.39232	3.32193	comp10918_c0	.	.	.	.	.	.	.	.	.	.	.
comp10919_c0_seq1	-0.137954	-0.434842	1	1	3.32193	3.58496	4	4.16993	comp10919_c0	.	.	.	.	.	.	.	.	.	.	.
comp10920_c0_seq1	-1.24736	5.22331	0.41877	1	9.23122	10.8114	8.8009	9.26679	comp10920_c0	sp|P0CB71|NDUB4_PONPY^P0CB71^Q:137-430,H:32-129^66.3265%ID^E:-36.1285^RecName: Full=NADH dehydrogenase [ubiquinone] 1 beta subcomplex subunit 4;^Eukaryota; Metazoa; Chordata; Craniata; Vertebrata; Euteleostomi; Mammalia; Eutheria; Euarchontoglires; Primates; Haplorrhini; Catarrhini; Hominidae; Pongo	.	m.4473	2-433[+]	sp|Q9CQC7|NDUB4_MOUSE^Q9CQC7^Q:19-143,H:6-129^66.4%ID^E:-43.94^RecName: Full=NADH dehydrogenase [ubiquinone] 1 beta subcomplex subunit 4;^Eukaryota; Metazoa; Chordata; Craniata; Vertebrata; Euteleostomi; Mammalia; Eutheria; Euarchontoglires; Glires; Rodentia; Sciurognathi; Muroidea; Muridae; Murinae; Mus; Mus	PF07225.7^NDUF_B4^NADH-ubiquinone oxidoreductase B15 subunit (NDUFB4)^18-143^E:9.4e-58	.	ExpAA=18.70^PredHel=1^Topology=o100-119i	NOG17910^NADH dehydrogenase (ubiquinone) 1 beta subcomplex	GO:0016021^cellular_component^integral to membrane`GO:0005747^cellular_component^mitochondrial respiratory chain complex I`GO:0008137^molecular_function^NADH dehydrogenase (ubiquinone) activity`GO:0022900^biological_process^electron transport chain`GO:0006979^biological_process^response to oxidative stress
comp10921_c0_seq1	-0.99371	-0.790309	0.645274	1	3	4.75489	2.80735	2	comp10921_c0	.	.	.	.	.	.	.	.	.	.	.
comp10922_c0_seq1	1.68047	-1.10429	0.504915	1	0	4.9542	2.58496	-Inf	comp10922_c0	.	.	.	.	.	.	.	.	.	.	.
comp10922_c0_seq2	1.68047	-1.78637	0.510472	1	0	2	2.58496	2.80735	comp10922_c0	.	.	.	.	.	.	.	.	.	.	.
comp10923_c0_seq1	0.782972	6.44302	0.606972	1	9.34651	11.6221	10.9469	11.2372	comp10923_c0	sp|Q15008|PSMD6_HUMAN^Q15008^Q:1289-123,H:1-389^94.3445%ID^E:-212.56^RecName: Full=26S proteasome non-ATPase regulatory subunit 6;^Eukaryota; Metazoa; Chordata; Craniata; Vertebrata; Euteleostomi; Mammalia; Eutheria; Euarchontoglires; Primates; Haplorrhini; Catarrhini; Hominidae; Homo	.	m.4474	120-1289[-]	sp|Q15008|PSMD6_HUMAN^Q15008^Q:1-389,H:1-389^94.3445%ID^E:-212.64^RecName: Full=26S proteasome non-ATPase regulatory subunit 6;^Eukaryota; Metazoa; Chordata; Craniata; Vertebrata; Euteleostomi; Mammalia; Eutheria; Euarchontoglires; Primates; Haplorrhini; Catarrhini; Hominidae; Homo	PF10602.4^RPN7^26S proteasome subunit RPN7^66-239^E:2.1e-62`PF01399.22^PCI^PCI domain^255-357^E:8.7e-16	.	.	COG5187^26S proteasome regulatory complex component, contains PCI domain	GO:0005829^cellular_component^cytosol`GO:0005654^cellular_component^nucleoplasm`GO:0022624^cellular_component^proteasome accessory complex`GO:0016887^molecular_function^ATPase activity`GO:0031145^biological_process^anaphase-promoting complex-dependent proteasomal ubiquitin-dependent protein catabolic process`GO:0002479^biological_process^antigen processing and presentation of exogenous peptide an…
comp10924_c0_seq1	-0.388775	-1.35018	1	1	1.58496	3.70044	2	3	comp10924_c0	.	.	.	.	.	.	.	.	.	.	.
comp10925_c0_seq1	5.84372	-1.57111	0.182894	1	-Inf	1.58496	3.16993	3.32193	comp10925_c0	.	.	.	.	.	.	.	.	.	.	.
comp10926_c0_seq1	-0.228632	-0.941249	1	1	2.58496	3.90689	3.16993	3.16993	comp10926_c0	.	.	.	.	.	.	.	.	.	.	.
comp10927_c0_seq1	1.27285	-0.953245	0.600712	1	1.58496	3.16993	3.70044	3.70044	comp10927_c0	.	.	.	.	.	.	.	.	.	.	.
comp10928_c0_seq1	-1.22508	-0.118405	0.532898	1	4.58496	4.45943	4.16993	2.58496	comp10928_c0	sp|Q6UXG2|K1324_HUMAN^Q6UXG2^Q:2-586,H:83-278^76.0204%ID^E:-90.68^RecName: Full=UPF0577 protein KIAA1324;^Eukaryota; Metazoa; Chordata; Craniata; Vertebrata; Euteleostomi; Mammalia; Eutheria; Euarchontoglires; Primates; Haplorrhini; Catarrhini; Hominidae; Homo	.	m.4476	2-589[+]	sp|Q6UXG2|K1324_HUMAN^Q6UXG2^Q:1-195,H:83-278^76.0204%ID^E:-90.68^RecName: Full=UPF0577 protein KIAA1324;^Eukaryota; Metazoa; Chordata; Craniata; Vertebrata; Euteleostomi; Mammalia; Eutheria; Euarchontoglires; Primates; Haplorrhini; Catarrhini; Hominidae; Homo	.	.	.	NOG236097^Cell adhesion molecule	GO:0005887^cellular_component^integral to plasma membrane`GO:0016236^biological_process^macroautophagy`GO:2000786^biological_process^positive regulation of autophagic vacuole assembly`GO:0042981^biological_process^regulation of apoptotic process
comp10929_c0_seq2	-0.542336	-1.4885	0.800774	1	2.32193	3.16993	2.58496	2	comp10929_c0	.	.	.	.	.	.	.	.	.	.	.
comp10930_c0_seq1	-1.10874	-1.26317	0.675457	1	2.32193	3.80735	2	2.80735	comp10930_c0	.	.	.	.	.	.	.	.	.	.	.
comp10931_c0_seq1	5.67693	-1.56399	0.217941	1	-Inf	3.90689	3	0	comp10931_c0	.	.	.	.	.	.	.	.	.	.	.
comp10932_c0_seq1	5.67693	-1.38316	0.216395	1	-Inf	3.16993	3	3.32193	comp10932_c0	sp|Q05B52|COQ4_BOVIN^Q05B52^Q:250-125,H:23-67^40%ID^E:-0.14^RecName: Full=Ubiquinone biosynthesis protein COQ4 homolog, mitochondrial;^Eukaryota; Metazoa; Chordata; Craniata; Vertebrata; Euteleostomi; Mammalia; Eutheria; Laurasiatheria; Cetartiodactyla; Ruminantia; Pecora; Bovidae; Bovinae; Bos	.	.	.	.	.	.	.	COG5031^Uncharacterized protein involved in ubiquinone biosynthesis	GO:0005743^cellular_component^mitochondrial inner membrane`GO:0006744^biological_process^ubiquinone biosynthetic process	.
comp10933_c0_seq1	0.0305233	0.807376	1	1	4.32193	5.90689	5.16993	5.12928	comp10933_c0	sp|P64017|ECHA8_MYCBO^P64017^Q:469-753,H:111-205^40%ID^E:-17.4818^RecName: Full=Probable enoyl-CoA hydratase echA8;^Bacteria; Actinobacteria; Actinobacteridae; Actinomycetales; Corynebacterineae; Mycobacteriaceae; Mycobacterium; Mycobacterium tuberculosis complex	.	m.4478	136-912[+]	sp|P64017|ECHA8_MYCBO^P64017^Q:97-206,H:96-205^43.6364%ID^E:-23.6718^RecName: Full=Probable enoyl-CoA hydratase echA8;^Bacteria; Actinobacteria; Actinobacteridae; Actinomycetales; Corynebacterineae; Mycobacteriaceae; Mycobacterium; Mycobacterium tuberculosis complex	PF00378.15^ECH^Enoyl-CoA hydratase/isomerase family^5-236^E:2e-46	.	.	COG1024^Enoyl-CoA hydratase/carnithine racemase	GO:0004300^molecular_function^enoyl-CoA hydratase activity`GO:0006631^biological_process^fatty acid metabolic process
comp10933_c0_seq2	0.556999	0.351945	0.791366	1	3.32193	5.12928	4.70044	5.16993	comp10933_c0	sp|P64016|ECHA8_MYCTU^P64016^Q:342-539,H:6-71^36.3636%ID^E:-17.373^RecName: Full=Probable enoyl-CoA hydratase echA8;^Bacteria; Actinobacteria; Actinobacteridae; Actinomycetales; Corynebacterineae; Mycobacteriaceae; Mycobacterium; Mycobacterium tuberculosis complex	.	m.4479	138-1112[+]	sp|P64016|ECHA8_MYCTU^P64016^Q:69-134,H:6-71^36.3636%ID^E:-23.5309^RecName: Full=Probable enoyl-CoA hydratase echA8;^Bacteria; Actinobacteria; Actinobacteridae; Actinomycetales; Corynebacterineae; Mycobacteriaceae; Mycobacterium; Mycobacterium tuberculosis complex	PF00378.15^ECH^Enoyl-CoA hydratase/isomerase family^71-302^E:4.5e-46	.	.	COG1024^Enoyl-CoA hydratase/carnithine racemase	GO:0005618^cellular_component^cell wall`GO:0005886^cellular_component^plasma membrane`GO:0004300^molecular_function^enoyl-CoA hydratase activity`GO:0006631^biological_process^fatty acid metabolic process
comp10934_c0_seq1	-7.99502	-1.31177	0.0278232	0.603606	4.52356	0	-Inf	-Inf	comp10934_c0	.	.	.	.	.	.	.	.	.	.	.
comp10935_c0_seq1	-0.907735	5.89022	0.545994	1	9.68299	10.7657	9.59246	10.8138	comp10935_c0	sp|P33316|DUT_HUMAN^P33316^Q:301-789,H:94-252^79.1411%ID^E:-68.66^RecName: Full=Deoxyuridine 5'-triphosphate nucleotidohydrolase, mitochondrial;^Eukaryota; Metazoa; Chordata; Craniata; Vertebrata; Euteleostomi; Mammalia; Eutheria; Euarchontoglires; Primates; Haplorrhini; Catarrhini; Hominidae; Homo	.	m.4480	286-792[+]	sp|P33316|DUT_HUMAN^P33316^Q:6-168,H:94-252^79.1411%ID^E:-69.14^RecName: Full=Deoxyuridine 5'-triphosphate nucleotidohydrolase, mitochondrial;^Eukaryota; Metazoa; Chordata; Craniata; Vertebrata; Euteleostomi; Mammalia; Eutheria; Euarchontoglires; Primates; Haplorrhini; Catarrhini; Hominidae; Homo	PF00692.14^dUTPase^dUTPase^38-166^E:3.4e-46	.	.	COG0756^dUTPase	GO:0005739^cellular_component^mitochondrion`GO:0005654^cellular_component^nucleoplasm`GO:0004170^molecular_function^dUTP diphosphatase activity`GO:0006260^biological_process^DNA replication`GO:0006226^biological_process^dUMP biosynthetic process`GO:0046080^biological_process^dUTP metabolic process`GO:0006206^biological_process^pyrimidine nucleobase metabolic process`GO:0046134^biological_process^…
comp10936_c0_seq1	0.315052	-1.32549	1	1	2.32193	2.32193	3.45943	2.58496	comp10936_c0	.	.	.	.	.	.	.	.	.	.	.
comp10937_c0_seq1	-0.801089	-1.48248	0.724451	1	2.58496	3.16993	2.58496	1.58496	comp10937_c0	.	.	.	.	.	.	.	.	.	.	.
comp10938_c0_seq1	0.394675	-1.31372	1	1	1.58496	1	2.80735	3.90689	comp10938_c0	.	.	.	.	.	.	.	.	.	.	.
comp10940_c0_seq1	1.88821	-0.771611	0.41035	1	1.58496	3.80735	4.32193	3	comp10940_c0	.	.	.	.	.	.	.	.	.	.	.
comp10941_c0_seq1	3.39105	-0.908765	0.153526	1	0	3.32193	4.32193	3.16993	comp10941_c0	.	.	.	.	.	.	.	.	.	.	.
comp10942_c0_seq1	-0.264741	6.69258	0.863221	1	10.703	11.4988	11.2556	10.7855	comp10942_c0	sp|Q3T0P5|CASP6_BOVIN^Q3T0P5^Q:210-1040,H:16-293^71.3262%ID^E:-107.72^RecName: Full=Caspase-6;^Eukaryota; Metazoa; Chordata; Craniata; Vertebrata; Euteleostomi; Mammalia; Eutheria; Laurasiatheria; Cetartiodactyla; Ruminantia; Pecora; Bovidae; Bovinae; Bos	.	m.4481	3-1043[+]	sp|O08738|CASP6_MOUSE^O08738^Q:74-344,H:2-273^71.6912%ID^E:-111.36^RecName: Full=Caspase-6;^Eukaryota; Metazoa; Chordata; Craniata; Vertebrata; Euteleostomi; Mammalia; Eutheria; Euarchontoglires; Glires; Rodentia; Sciurognathi; Muroidea; Muridae; Murinae; Mus; Mus	PF00656.17^Peptidase_C14^Caspase domain^101-340^E:2.2e-44	.	.	.	GO:0005829^cellular_component^cytosol`GO:0005634^cellular_component^nucleus`GO:0004197^molecular_function^cysteine-type endopeptidase activity`GO:0002525^biological_process^acute inflammatory response to non-antigenic stimulus`GO:0006915^biological_process^apoptotic process`GO:0002088^biological_process^lens development in camera-type eye`GO:0043525^biological_process^positive regulation of neuro…
comp10944_c0_seq1	1.33303	0.180679	0.533629	1	2	4.45943	4.16993	5.61471	comp10944_c0	.	.	.	.	.	.	.	.	.	.	.
comp10947_c0_seq1	0.171423	6.15788	0.90963	1	9.47168	11.4372	10.4605	10.7944	comp10947_c0	sp|Q9UKK9|NUDT5_HUMAN^Q9UKK9^Q:938-282,H:1-218^68.4932%ID^E:-81.4^RecName: Full=ADP-sugar pyrophosphatase;^Eukaryota; Metazoa; Chordata; Craniata; Vertebrata; Euteleostomi; Mammalia; Eutheria; Euarchontoglires; Primates; Haplorrhini; Catarrhini; Hominidae; Homo	.	m.4482	270-1118[-]	sp|Q9UKK9|NUDT5_HUMAN^Q9UKK9^Q:61-279,H:1-218^69.4064%ID^E:-84.59^RecName: Full=ADP-sugar pyrophosphatase;^Eukaryota; Metazoa; Chordata; Craniata; Vertebrata; Euteleostomi; Mammalia; Eutheria; Euarchontoglires; Primates; Haplorrhini; Catarrhini; Hominidae; Homo	PF00293.23^NUDIX^NUDIX domain^121-244^E:2e-16	.	.	COG0494^NTP pyrophosphohydrolases including oxidative damage repair enzymes	GO:0005622^cellular_component^intracellular`GO:0047631^molecular_function^ADP-ribose diphosphatase activity`GO:0019144^molecular_function^ADP-sugar diphosphatase activity`GO:0000287^molecular_function^magnesium ion binding`GO:0017110^molecular_function^nucleoside-diphosphatase activity`GO:0019303^biological_process^D-ribose catabolic process`GO:0009117^biological_process^nucleotide metabolic proc…
comp10948_c0_seq1	-1.74826	3.6693	0.328734	1	8.17991	8.64386	7.24793	7.60733	comp10948_c0	sp|O43670|ZN207_HUMAN^O43670^Q:1436-1480,H:435-449^73.3333%ID^E:-135.236^RecName: Full=Zinc finger protein 207;^Eukaryota; Metazoa; Chordata; Craniata; Vertebrata; Euteleostomi; Mammalia; Eutheria; Euarchontoglires; Primates; Haplorrhini; Catarrhini; Hominidae; Homo	.	m.4485	2-1570[+]	sp|O43670|ZN207_HUMAN^O43670^Q:41-522,H:1-478^80.2875%ID^E:-220.59^RecName: Full=Zinc finger protein 207;^Eukaryota; Metazoa; Chordata; Craniata; Vertebrata; Euteleostomi; Mammalia; Eutheria; Euarchontoglires; Primates; Haplorrhini; Catarrhini; Hominidae; Homo	PF12868.2^DUF3824^Domain of unknwon function (DUF3824)^132-205^E:0.00067	.	.	NOG247182^Latent transforming growth factor beta binding protein like (3F865)	GO:0005634^cellular_component^nucleus`GO:0003677^molecular_function^DNA binding`GO:0046872^molecular_function^metal ion binding`GO:0003700^molecular_function^sequence-specific DNA binding transcription factor activity`GO:0008270^molecular_function^zinc ion binding
comp10948_c0_seq2	0.952183	6.39915	0.5323	1	9.06878	11.6497	10.8384	11.2825	comp10948_c0	sp|O43670|ZN207_HUMAN^O43670^Q:1343-1387,H:435-449^73.3333%ID^E:-110.42^RecName: Full=Zinc finger protein 207;^Eukaryota; Metazoa; Chordata; Craniata; Vertebrata; Euteleostomi; Mammalia; Eutheria; Euarchontoglires; Primates; Haplorrhini; Catarrhini; Hominidae; Homo	.	m.4487	2-1477[+]	sp|O43670|ZN207_HUMAN^O43670^Q:41-303,H:1-265^79.4776%ID^E:-118^RecName: Full=Zinc finger protein 207;^Eukaryota; Metazoa; Chordata; Craniata; Vertebrata; Euteleostomi; Mammalia; Eutheria; Euarchontoglires; Primates; Haplorrhini; Catarrhini; Hominidae; Homo	PF12868.2^DUF3824^Domain of unknwon function (DUF3824)^132-205^E:0.00061	.	.	NOG247182^Latent transforming growth factor beta binding protein like (3F865)	GO:0005634^cellular_component^nucleus`GO:0003677^molecular_function^DNA binding`GO:0046872^molecular_function^metal ion binding`GO:0003700^molecular_function^sequence-specific DNA binding transcription factor activity`GO:0008270^molecular_function^zinc ion binding
comp1095_c0_seq1	-0.136668	-1.50656	1	1	2.32193	2.32193	3	2.32193	comp1095_c0	.	.	.	.	.	.	.	.	.	.	.
comp10950_c0_seq1	1.10919	1.32558	0.623881	1	3.45943	7.63662	5.39232	3.70044	comp10950_c0	.	.	.	.	.	.	.	.	.	.	.
comp10952_c0_seq1	-1.55145	4.58283	0.341805	1	8.73471	9.9901	8	8.76818	comp10952_c0	.	.	.	.	.	.	.	.	.	.	.
comp10953_c0_seq1	4.30815	-2.07554	0.632989	1	-Inf	3	1.58496	1.58496	comp10953_c0	.	.	.	.	.	.	.	.	.	.	.
comp10954_c0_seq1	1.55306	6.34729	0.313718	1	8.34873	12.4011	10.7194	10.4949	comp10954_c0	sp|P19382|SNAI1_XENLA^P19382^Q:166-462,H:1-101^69.9029%ID^E:-112.672^RecName: Full=Protein snail homolog Sna;^Eukaryota; Metazoa; Chordata; Craniata; Vertebrata; Euteleostomi; Amphibia; Batrachia; Anura; Pipoidea; Pipidae; Xenopodinae; Xenopus; Xenopus	.	m.4491	166-945[+]	sp|P19382|SNAI1_XENLA^P19382^Q:1-255,H:1-255^79.5367%ID^E:-118.98^RecName: Full=Protein snail homolog Sna;^Eukaryota; Metazoa; Chordata; Craniata; Vertebrata; Euteleostomi; Amphibia; Batrachia; Anura; Pipoidea; Pipidae; Xenopodinae; Xenopus; Xenopus	PF13912.1^zf-C2H2_6^C2H2-type zinc finger^119-143^E:0.0068`PF00096.21^zf-C2H2^Zinc finger, C2H2 type^150-172^E:0.0031`PF13894.1^zf-C2H2_4^C2H2-type zinc finger^150-172^E:0.047`PF13912.1^zf-C2H2_6^C2H2-type zinc finger^150-172^E:1.6`PF13465.1^zf-H2C2_2^Zinc-finger double domain^164-187^E:0.0068`PF00096.21^zf-C2H2^Zinc finger, C2H2 type^177-198^E:6.5e-06`PF13894.1^zf-C2H2_4^C2H2-type zinc finger^17…	.	.	.	GO:0005634^cellular_component^nucleus`GO:0003677^molecular_function^DNA binding`GO:0046872^molecular_function^metal ion binding`GO:0008270^molecular_function^zinc ion binding`GO:0000122^biological_process^negative regulation of transcription from RNA polymerase II promoter`GO:0014036^biological_process^neural crest cell fate specification`GO:0001755^biological_process^neural crest cell migration
comp10955_c0_seq1	-8.79098	-0.610674	0.0123586	0.466285	5.32193	-Inf	-Inf	-Inf	comp10955_c0	.	.	.	.	.	.	.	.	.	.	.
comp10956_c0_seq1	-0.228632	-0.812598	1	1	2.58496	4.58496	3.16993	2.58496	comp10956_c0	.	.	m.4495	1-420[-]	.	.	.	.	.	.
comp1096_c0_seq1	-0.785489	-2.03995	0.834697	1	1.58496	2.58496	1.58496	1	comp1096_c0	.	.	.	.	.	.	.	.	.	.	.
comp10960_c0_seq1	0.315052	-0.822574	1	1	2.32193	3.90689	3.45943	3.58496	comp10960_c0	.	.	m.4496	3-311[-]	.	.	.	.	.	.
comp10961_c0_seq1	0.394675	-1.08887	1	1	1.58496	3.16993	2.80735	3.90689	comp10961_c0	sp|O60721|NCKX1_HUMAN^O60721^Q:317-222,H:1068-1099^78.125%ID^E:-7.45^RecName: Full=Sodium/potassium/calcium exchanger 1;^Eukaryota; Metazoa; Chordata; Craniata; Vertebrata; Euteleostomi; Mammalia; Eutheria; Euarchontoglires; Primates; Haplorrhini; Catarrhini; Hominidae; Homo	.	.	.	.	.	.	.	COG0530^Ca2+/Na+ antiporter	GO:0005887^cellular_component^integral to plasma membrane`GO:0019867^cellular_component^outer membrane`GO:0008273^molecular_function^calcium, potassium:sodium antiporter activity`GO:0015293^molecular_function^symporter activity`GO:0009642^biological_process^response to light intensity`GO:0007601^biological_process^visual perception	.
comp10962_c0_seq1	-0.932941	-0.600355	0.659908	1	3.58496	4.08746	3.45943	3.32193	comp10962_c0	.	.	.	.	.	.	.	.	.	.	.
comp10963_c0_seq1	1.32945	7.46983	0.423169	1	10.3772	13.0051	12.5241	11.0063	comp10963_c0	sp|P40682|VAS1_BOVIN^P40682^Q:3609-2809,H:22-288^60.1476%ID^E:-127.01^RecName: Full=V-type proton ATPase subunit S1;^Eukaryota; Metazoa; Chordata; Craniata; Vertebrata; Euteleostomi; Mammalia; Eutheria; Laurasiatheria; Cetartiodactyla; Ruminantia; Pecora; Bovidae; Bovinae; Bos	.	m.4497	2260-3606[-]	sp|P40682|VAS1_BOVIN^P40682^Q:1-266,H:23-288^60.3704%ID^E:-130.283^RecName: Full=V-type proton ATPase subunit S1;^Eukaryota; Metazoa; Chordata; Craniata; Vertebrata; Euteleostomi; Mammalia; Eutheria; Laurasiatheria; Cetartiodactyla; Ruminantia; Pecora; Bovidae; Bovinae; Bos	PF05827.7^ATP-synt_S1^Vacuolar ATP synthase subunit S1 (ATP6S1)^24-427^E:1.4e-75	sigP:1^20^0.618^YES	ExpAA=23.86^PredHel=1^Topology=o398-420i	.	GO:0016021^cellular_component^integral to membrane`GO:0033180^cellular_component^proton-transporting V-type ATPase, V1 domain`GO:0005774^cellular_component^vacuolar membrane`GO:0005524^molecular_function^ATP binding`GO:0046933^molecular_function^hydrogen ion transporting ATP synthase activity, rotational mechanism`GO:0046961^molecular_function^proton-transporting ATPase activity, rotational mecha…
comp10964_c0_seq1	0.242581	6.1799	0.872019	1	9.68825	11.4522	10.7482	10.4041	comp10964_c0	sp|Q3SWX7|ANXA3_BOVIN^Q3SWX7^Q:793-1338,H:142-323^76.3736%ID^E:-119.572^RecName: Full=Annexin A3;^Eukaryota; Metazoa; Chordata; Craniata; Vertebrata; Euteleostomi; Mammalia; Eutheria; Laurasiatheria; Cetartiodactyla; Ruminantia; Pecora; Bovidae; Bovinae; Bos	.	m.4498	361-1341[+]	sp|Q3SWX7|ANXA3_BOVIN^Q3SWX7^Q:5-326,H:2-323^73.2919%ID^E:-134.83^RecName: Full=Annexin A3;^Eukaryota; Metazoa; Chordata; Craniata; Vertebrata; Euteleostomi; Mammalia; Eutheria; Laurasiatheria; Cetartiodactyla; Ruminantia; Pecora; Bovidae; Bovinae; Bos	PF00191.15^Annexin^Annexin^26-90^E:1.7e-24`PF00191.15^Annexin^Annexin^97-162^E:1.2e-23`PF00191.15^Annexin^Annexin^180-246^E:7.9e-25`PF00191.15^Annexin^Annexin^256-320^E:4.9e-23	.	.	.	GO:0005509^molecular_function^calcium ion binding`GO:0005544^molecular_function^calcium-dependent phospholipid binding`GO:0019834^molecular_function^phospholipase A2 inhibitor activity
comp10965_c0_seq1	-2.89101	-1.25333	0.202122	1	3.16993	4	1	1.58496	comp10965_c0	.	.	.	.	.	.	.	.	.	.	.
comp10967_c0_seq1	1.30295	6.60547	0.400297	1	8.87036	11.8289	10.9908	11.6658	comp10967_c0	sp|Q8IUH3|RBM45_HUMAN^Q8IUH3^Q:851-1216,H:231-355^65.6%ID^E:-181.76^RecName: Full=RNA-binding protein 45;^Eukaryota; Metazoa; Chordata; Craniata; Vertebrata; Euteleostomi; Mammalia; Eutheria; Euarchontoglires; Primates; Haplorrhini; Catarrhini; Hominidae; Homo	.	m.4499	131-1591[+]	sp|Q8IUH3|RBM45_HUMAN^Q8IUH3^Q:241-362,H:231-355^65.6%ID^E:-184.898^RecName: Full=RNA-binding protein 45;^Eukaryota; Metazoa; Chordata; Craniata; Vertebrata; Euteleostomi; Mammalia; Eutheria; Euarchontoglires; Primates; Haplorrhini; Catarrhini; Hominidae; Homo	PF14259.1^RRM_6^RNA recognition motif (a.k.a. RRM, RBD, or RNP domain)^27-86^E:7.8e-09`PF00076.17^RRM_1^RNA recognition motif. (a.k.a. RRM, RBD, or RNP domain)^28-89^E:2e-15`PF13893.1^RRM_5^RNA recognition motif. (a.k.a. RRM, RBD, or RNP domain)^36-98^E:2.4e-08`PF00076.17^RRM_1^RNA recognition motif. (a.k.a. RRM, RBD, or RNP domain)^121-177^E:2.1e-13`PF14259.1^RRM_6^RNA recognition motif (a.k.a. …	.	.	NOG145324^RNA binding motif protein 45	GO:0005737^cellular_component^cytoplasm`GO:0005634^cellular_component^nucleus`GO:0000166^molecular_function^nucleotide binding`GO:0003723^molecular_function^RNA binding`GO:0030154^biological_process^cell differentiation`GO:0007399^biological_process^nervous system development
comp10969_c0_seq1	-2.26676	-0.605029	0.340349	1	3.80735	3.45943	2.32193	4.16993	comp10969_c0	.	.	.	.	.	.	.	.	.	.	.
comp10969_c0_seq2	-2.53253	-1.12108	0.278995	1	2.80735	3.58496	1	3.58496	comp10969_c0	.	.	.	.	.	.	.	.	.	.	.
comp10971_c0_seq1	-0.136668	-1.17248	1	1	2.32193	3.58496	3	2.80735	comp10971_c0	.	.	.	.	.	.	.	.	.	.	.
comp10972_c0_seq1	5.48831	-1.84129	0.269225	1	-Inf	3.32193	2.80735	0	comp10972_c0	.	.	.	.	.	.	.	.	.	.	.
comp10973_c0_seq1	0.0752738	0.414264	1	1	3.80735	4.90689	4.70044	5.2854	comp10973_c0	.	.	.	.	.	.	.	.	.	.	.
comp10974_c0_seq1	2.51642	0.086753	0.271434	1	1.58496	5.12928	4.9542	4.45943	comp10974_c0	sp|P08548|LIN1_NYCCO^P08548^Q:777-595,H:7-68^40.3226%ID^E:-2.4^RecName: Full=LINE-1 reverse transcriptase homolog;^Eukaryota; Metazoa; Chordata; Craniata; Vertebrata; Euteleostomi; Mammalia; Eutheria; Euarchontoglires; Primates; Strepsirrhini; Chiromyiformes; Lorisidae; Nycticebus	.	.	.	.	.	.	.	.	GO:0046872^molecular_function^metal ion binding`GO:0003723^molecular_function^RNA binding`GO:0003964^molecular_function^RNA-directed DNA polymerase activity`GO:0006278^biological_process^RNA-dependent DNA replication	.
comp10976_c0_seq2	5.48831	-0.510522	0.263586	1	-Inf	5.42626	2.80735	3.58496	comp10976_c0	.	.	.	.	.	.	.	.	.	.	.
comp10980_c0_seq1	-0.00976039	-1.56928	1	1	2	2.58496	2.80735	2.32193	comp10980_c0	.	.	.	.	.	.	.	.	.	.	.
comp10981_c0_seq1	-0.542336	-1.12464	0.799439	1	2.32193	4	2.58496	2.80735	comp10981_c0	.	.	.	.	.	.	.	.	.	.	.
comp10983_c0_seq1	0.180954	-0.216741	0.954913	1	3.16993	4.24793	4.16993	4.45943	comp10983_c0	.	.	m.4503	2-376[+]	.	.	.	.	.	.
comp10984_c0_seq1	1.11407	-1.8972	0.771499	1	0	1.58496	2	3	comp10984_c0	sp|Q1LZ53|DNM3A_RAT^Q1LZ53^Q:211-2,H:472-541^94.2857%ID^E:-36.9^RecName: Full=DNA (cytosine-5)-methyltransferase 3A;^Eukaryota; Metazoa; Chordata; Craniata; Vertebrata; Euteleostomi; Mammalia; Eutheria; Euarchontoglires; Glires; Rodentia; Sciurognathi; Muroidea; Muridae; Murinae; Rattus	.	.	.	.	.	.	.	NOG70699^DNA (cytosine-5-)-methyltransferase	GO:0000775^cellular_component^chromosome, centromeric region`GO:0005737^cellular_component^cytoplasm`GO:0000791^cellular_component^euchromatin`GO:0005720^cellular_component^nuclear heterochromatin`GO:0016363^cellular_component^nuclear matrix`GO:0003682^molecular_function^chromatin binding`GO:0051718^molecular_function^DNA (cytosine-5-)-methyltransferase activity, acting on CpG substrates`GO:00468…	.
comp10987_c0_seq1	0.495139	-1.04864	0.827013	1	2	3.16993	3.32193	3.58496	comp10987_c0	.	.	.	.	.	.	.	.	.	.	.
comp10988_c0_seq1	1.07253	-1.68264	0.650033	1	2	-Inf	3.90689	-Inf	comp10988_c0	sp|P31286|WNT5A_XENLA^P31286^Q:219-1,H:52-124^94.5205%ID^E:-35.74^RecName: Full=Protein Wnt-5a;^Eukaryota; Metazoa; Chordata; Craniata; Vertebrata; Euteleostomi; Amphibia; Batrachia; Anura; Pipoidea; Pipidae; Xenopodinae; Xenopus; Xenopus	.	.	.	.	.	.	.	.	GO:0043234^cellular_component^protein complex`GO:0005578^cellular_component^proteinaceous extracellular matrix`GO:0005109^molecular_function^frizzled binding`GO:0008595^biological_process^anterior/posterior axis specification, embryo`GO:0060070^biological_process^canonical Wnt receptor signaling pathway`GO:0042074^biological_process^cell migration involved in gastrulation`GO:0090090^biological_pr…	.
comp10989_c0_seq1	5.27127	-1.53811	0.26607	1	-Inf	4.16993	2.58496	0	comp10989_c0	.	.	.	.	.	.	.	.	.	.	.
comp1099_c0_seq1	1.68047	-1.79449	0.510562	1	0	2.32193	2.58496	2.58496	comp1099_c0	.	.	.	.	.	.	.	.	.	.	.
comp10990_c0_seq1	-0.865722	5.96766	0.564452	1	10.0485	11.1611	10	10.1098	comp10990_c0	sp|Q7ZXW9|TISDA_XENLA^Q7ZXW9^Q:929-1111,H:194-259^48.4848%ID^E:-68.3165^RecName: Full=Zinc finger protein 36, C3H1 type-like 2-A;^Eukaryota; Metazoa; Chordata; Craniata; Vertebrata; Euteleostomi; Amphibia; Batrachia; Anura; Pipoidea; Pipidae; Xenopodinae; Xenopus; Xenopus	.	m.4504	2-1240[+]	sp|Q7ZXW9|TISDA_XENLA^Q7ZXW9^Q:215-296,H:124-205^91.4634%ID^E:-82.9136^RecName: Full=Zinc finger protein 36, C3H1 type-like 2-A;^Eukaryota; Metazoa; Chordata; Craniata; Vertebrata; Euteleostomi; Amphibia; Batrachia; Anura; Pipoidea; Pipidae; Xenopodinae; Xenopus; Xenopus	PF04553.7^Tis11B_N^Tis11B like protein, N terminus^67-198^E:3e-19`PF00642.19^zf-CCCH^Zinc finger C-x8-C-x5-C-x3-H type (and similar)^223-248^E:7.5e-12`PF00642.19^zf-CCCH^Zinc finger C-x8-C-x5-C-x3-H type (and similar)^261-286^E:1.3e-10	.	.	.	GO:0005737^cellular_component^cytoplasm`GO:0005634^cellular_component^nucleus`GO:0003677^molecular_function^DNA binding`GO:0046872^molecular_function^metal ion binding`GO:0003723^molecular_function^RNA binding`GO:0008270^molecular_function^zinc ion binding`GO:0000288^biological_process^nuclear-transcribed mRNA catabolic process, deadenylation-dependent decay`GO:0048793^biological_process^pronephr…
comp10992_c0_seq1	-1.05294	0.388933	0.638481	1	4.70044	5.64386	4.45943	3.45943	comp10992_c0	sp|A4UGR9|XIRP2_HUMAN^A4UGR9^Q:157-219,H:37-57^71.4286%ID^E:-27.9325^RecName: Full=Xin actin-binding repeat-containing protein 2;^Eukaryota; Metazoa; Chordata; Craniata; Vertebrata; Euteleostomi; Mammalia; Eutheria; Euarchontoglires; Primates; Haplorrhini; Catarrhini; Hominidae; Homo	.	m.4506	1-729[+]	sp|A4UGR9|XIRP2_HUMAN^A4UGR9^Q:53-181,H:37-167^46.2121%ID^E:-33.3545^RecName: Full=Xin actin-binding repeat-containing protein 2;^Eukaryota; Metazoa; Chordata; Craniata; Vertebrata; Euteleostomi; Mammalia; Eutheria; Euarchontoglires; Primates; Haplorrhini; Catarrhini; Hominidae; Homo	.	.	.	NOG85108^Xin actin-binding repeat containing protein	GO:0030054^cellular_component^cell junction`GO:0030036^biological_process^actin cytoskeleton organization
comp10993_c0_seq1	-6.93705	-2.15205	0.0833435	1	3.45943	-Inf	-Inf	-Inf	comp10993_c0	.	.	.	.	.	.	.	.	.	.	.
comp10993_c0_seq2	-7.47393	-1.77325	0.0474511	0.762094	4	-Inf	-Inf	-Inf	comp10993_c0	.	.	.	.	.	.	.	.	.	.	.
comp10994_c0_seq1	0.583298	-1.25508	0.89081	1	1.58496	3.45943	3	3	comp10994_c0	.	.	.	.	.	.	.	.	.	.	.
comp10998_c0_seq1	1.31408	-1.58225	0.67759	1	1	2.58496	3.16993	2.32193	comp10998_c0	.	.	.	.	.	.	.	.	.	.	.
comp10999_c0_seq1	-0.230115	-0.568909	0.950883	1	3.32193	3.80735	3.90689	3.58496	comp10999_c0	sp|A5DZQ4|MTC6_LODEL^A5DZQ4^Q:143-280,H:120-165^30.4348%ID^E:-0.36^RecName: Full=Maintenance of telomere capping protein 6;^Eukaryota; Fungi; Dikarya; Ascomycota; Saccharomycotina; Saccharomycetes; Saccharomycetales; Debaryomycetaceae; Lodderomyces	.	.	.	.	.	.	.	.	GO:0016021^cellular_component^integral to membrane	.
comp110_c0_seq1	0.17763	-1.5409	1	1	1.58496	3	2.58496	2.58496	comp110_c0	.	.	.	.	.	.	.	.	.	.	.
comp1100_c0_seq1	3.75915	-2.28693	0.634478	1	-Inf	2.80735	1	1	comp1100_c0	.	.	.	.	.	.	.	.	.	.	.
comp11000_c0_seq1	-2.89101	-1.20005	0.201752	1	3.16993	1.58496	1	3.90689	comp11000_c0	sp|P37173|TGFR2_HUMAN^P37173^Q:265-2,H:50-138^31.4607%ID^E:-14.52^RecName: Full=TGF-beta receptor type-2;^Eukaryota; Metazoa; Chordata; Craniata; Vertebrata; Euteleostomi; Mammalia; Eutheria; Euarchontoglires; Primates; Haplorrhini; Catarrhini; Hominidae; Homo	.	.	.	.	.	.	.	COG0515^Serine/threonine protein kinase	GO:0005901^cellular_component^caveola`GO:0009897^cellular_component^external side of plasma membrane`GO:0070022^cellular_component^transforming growth factor beta receptor homodimeric complex`GO:0005524^molecular_function^ATP binding`GO:0005539^molecular_function^glycosaminoglycan binding`GO:0046872^molecular_function^metal ion binding`GO:0004702^molecular_function^receptor signaling protein seri…	.
comp11001_c0_seq1	-8.82653	-0.575361	0.0120767	0.464211	5.35755	-Inf	-Inf	-Inf	comp11001_c0	sp|P48675|DESM_RAT^P48675^Q:390-283,H:378-413^52.7778%ID^E:-2.34^RecName: Full=Desmin;^Eukaryota; Metazoa; Chordata; Craniata; Vertebrata; Euteleostomi; Mammalia; Eutheria; Euarchontoglires; Glires; Rodentia; Sciurognathi; Muroidea; Muridae; Murinae; Rattus	.	.	.	.	.	.	.	NOG147125^Structural constituent of cytoskeleton protein	GO:0005916^cellular_component^fascia adherens`GO:0005921^cellular_component^gap junction`GO:0031594^cellular_component^neuromuscular junction`GO:0042383^cellular_component^sarcolemma`GO:0045098^cellular_component^type III intermediate filament`GO:0030018^cellular_component^Z disc`GO:0005198^molecular_function^structural molecule activity	.
comp11002_c0_seq1	-1.12399	4.54305	0.488256	1	8.59246	9.86264	8.2854	8.79766	comp11002_c0	sp|Q1RMH3|COX14_BOVIN^Q1RMH3^Q:84-236,H:1-51^76.4706%ID^E:-14.83^RecName: Full=Cytochrome c oxidase assembly protein COX14;^Eukaryota; Metazoa; Chordata; Craniata; Vertebrata; Euteleostomi; Mammalia; Eutheria; Laurasiatheria; Cetartiodactyla; Ruminantia; Pecora; Bovidae; Bovinae; Bos	.	.	.	.	.	.	.	NOG26035^Protein C12orf62	GO:0016021^cellular_component^integral to membrane`GO:0031966^cellular_component^mitochondrial membrane`GO:0005739^cellular_component^mitochondrion`GO:0033617^biological_process^mitochondrial respiratory chain complex IV assembly	.
comp11003_c0_seq1	5.84372	-1.363	0.181168	1	-Inf	4.16993	3.16993	1	comp11003_c0	.	.	.	.	.	.	.	.	.	.	.
comp11005_c0_seq1	0.608056	0.729292	0.788979	1	3.70044	6	5.12928	5.12928	comp11005_c0	.	.	.	.	.	.	.	.	.	.	.
comp11005_c0_seq2	0.59282	0.0604223	0.806398	1	3.16993	5.45943	4.58496	3.70044	comp11005_c0	.	.	.	.	.	.	.	.	.	.	.
comp11006_c0_seq1	6.47215	-0.988418	0.103227	1	-Inf	4.45943	3.80735	2	comp11006_c0	.	.	.	.	.	.	.	.	.	.	.
comp11008_c0_seq1	0.174633	4.45782	0.916789	1	7.50779	10.1383	8.49985	8.98299	comp11008_c0	.	.	.	.	.	.	.	.	.	.	.
comp11009_c0_seq1	-2.95166	-1.85939	0.371819	1	2.32193	3.16993	0	1	comp11009_c0	sp|Q9Y343|SNX24_HUMAN^Q9Y343^Q:104-42,H:1-20^85.7143%ID^E:-1.3^RecName: Full=Sorting nexin-24;^Eukaryota; Metazoa; Chordata; Craniata; Vertebrata; Euteleostomi; Mammalia; Eutheria; Euarchontoglires; Primates; Haplorrhini; Catarrhini; Hominidae; Homo	.	.	.	.	.	.	.	.	GO:0030659^cellular_component^cytoplasmic vesicle membrane`GO:0035091^molecular_function^phosphatidylinositol binding`GO:0007154^biological_process^cell communication`GO:0015031^biological_process^protein transport	.
comp11010_c0_seq1	-0.188636	6.12751	0.901084	1	9.36851	12.1212	9.99718	10.1241	comp11010_c0	sp|Q2HJ60|ROA2_BOVIN^Q2HJ60^Q:1172-1192,H:335-341^100%ID^E:-109.367^RecName: Full=Heterogeneous nuclear ribonucleoproteins A2/B1;^Eukaryota; Metazoa; Chordata; Craniata; Vertebrata; Euteleostomi; Mammalia; Eutheria; Laurasiatheria; Cetartiodactyla; Ruminantia; Pecora; Bovidae; Bovinae; Bos	.	m.4508	146-1195[+]	sp|Q2HJ60|ROA2_BOVIN^Q2HJ60^Q:6-349,H:1-341^87.8261%ID^E:-181.86^RecName: Full=Heterogeneous nuclear ribonucleoproteins A2/B1;^Eukaryota; Metazoa; Chordata; Craniata; Vertebrata; Euteleostomi; Mammalia; Eutheria; Laurasiatheria; Cetartiodactyla; Ruminantia; Pecora; Bovidae; Bovinae; Bos	PF00076.17^RRM_1^RNA recognition motif. (a.k.a. RRM, RBD, or RNP domain)^16-84^E:6.1e-16`PF14259.1^RRM_6^RNA recognition motif (a.k.a. RRM, RBD, or RNP domain)^16-85^E:1.3e-16`PF00076.17^RRM_1^RNA recognition motif. (a.k.a. RRM, RBD, or RNP domain)^107-174^E:6.2e-19`PF14259.1^RRM_6^RNA recognition motif (a.k.a. RRM, RBD, or RNP domain)^107-174^E:2.8e-15`PF13893.1^RRM_5^RNA recognition motif. (a.k…	.	.	COG0724^RNA-binding proteins (RRM domain)	GO:0005737^cellular_component^cytoplasm`GO:0005654^cellular_component^nucleoplasm`GO:0030529^cellular_component^ribonucleoprotein complex`GO:0005681^cellular_component^spliceosomal complex`GO:0000166^molecular_function^nucleotide binding`GO:0097157^molecular_function^pre-mRNA intronic binding`GO:0006397^biological_process^mRNA processing`GO:0048025^biological_process^negative regulation of mRNA s…
comp11011_c0_seq1	5.99321	-1.95289	0.160361	1	-Inf	0	3.32193	2	comp11011_c0	.	.	.	.	.	.	.	.	.	.	.
comp11014_c0_seq1	-1.94529	-1.48815	0.417	1	3.16993	2.58496	2	2	comp11014_c0	.	.	.	.	.	.	.	.	.	.	.
comp11015_c0_seq1	-6.93705	-1.74568	0.0797409	0.988693	3.45943	-Inf	-Inf	2.58496	comp11015_c0	.	.	.	.	.	.	.	.	.	.	.
comp11016_c0_seq1	-6.80072	-1.48636	0.0855874	1	3.32193	3.70044	-Inf	0	comp11016_c0	.	.	.	.	.	.	.	.	.	.	.
comp11017_c0_seq1	0.486037	-2.312	1	1	1	1	2.32193	0	comp11017_c0	.	.	.	.	.	.	.	.	.	.	.
comp11018_c0_seq1	0.179609	-1.24424	1	1	2.32193	3.45943	3.32193	2	comp11018_c0	.	.	.	.	.	.	.	.	.	.	.
comp1102_c0_seq1	0.17763	-2.07638	1	1	1.58496	1	2.58496	1	comp1102_c0	.	.	.	.	.	.	.	.	.	.	.
comp11020_c0_seq1	1.25132	0.239142	0.570618	1	2	5.85798	4.08746	4.80735	comp11020_c0	.	.	m.4510	60-392[+]	sp|Q8JZQ2|AFG32_MOUSE^Q8JZQ2^Q:61-109,H:65-115^45.098%ID^E:-4.54^RecName: Full=AFG3-like protein 2;^Eukaryota; Metazoa; Chordata; Craniata; Vertebrata; Euteleostomi; Mammalia; Eutheria; Euarchontoglires; Glires; Rodentia; Sciurognathi; Muroidea; Muridae; Murinae; Mus; Mus	.	.	.	COG0465^ATP-dependent Zn proteases	GO:0016021^cellular_component^integral to membrane`GO:0005743^cellular_component^mitochondrial inner membrane`GO:0005524^molecular_function^ATP binding`GO:0046872^molecular_function^metal ion binding`GO:0004222^molecular_function^metalloendopeptidase activity`GO:0017111^molecular_function^nucleoside-triphosphatase activity`GO:0008270^molecular_function^zinc ion binding`GO:0007409^biological_proce…
comp11021_c0_seq1	0.0637217	0.723744	1	1	4.24793	5.20945	5.12928	5.49185	comp11021_c0	.	.	.	.	.	.	.	.	.	.	.
comp11022_c0_seq1	-0.32529	-0.992843	0.906811	1	2.32193	3.58496	2.80735	3.70044	comp11022_c0	sp|P20825|POL2_DROME^P20825^Q:194-3,H:212-280^43.4783%ID^E:-6.86^RecName: Full=Retrovirus-related Pol polyprotein from transposon 297;^Eukaryota; Metazoa; Ecdysozoa; Arthropoda; Hexapoda; Insecta; Pterygota; Neoptera; Endopterygota; Diptera; Brachycera; Muscomorpha; Ephydroidea; Drosophilidae; Drosophila; Sophophora	.	m.4512	3-305[-]	sp|P20825|POL2_DROME^P20825^Q:38-101,H:212-280^43.4783%ID^E:-6.86^RecName: Full=Retrovirus-related Pol polyprotein from transposon 297;^Eukaryota; Metazoa; Ecdysozoa; Arthropoda; Hexapoda; Insecta; Pterygota; Neoptera; Endopterygota; Diptera; Brachycera; Muscomorpha; Ephydroidea; Drosophilidae; Drosophila; Sophophora	.	.	.	.	GO:0004190^molecular_function^aspartic-type endopeptidase activity`GO:0004519^molecular_function^endonuclease activity`GO:0003723^molecular_function^RNA binding`GO:0003964^molecular_function^RNA-directed DNA polymerase activity`GO:0015074^biological_process^DNA integration`GO:0090305^biological_process^nucleic acid phosphodiester bond hydrolysis`GO:0006508^biological_process^proteolysis`GO:000627…
comp11023_c0_seq1	0.399798	-0.515879	0.877961	1	2.58496	4.52356	3.80735	3.70044	comp11023_c0	.	.	.	.	.	.	.	.	.	.	.
comp11024_c0_seq1	6.25247	-1.55683	0.135751	1	-Inf	0	3.58496	3.16993	comp11024_c0	.	.	.	.	.	.	.	.	.	.	.
comp11025_c0_seq1	-1.46634	-1.11398	0.552693	1	3	4.08746	2.32193	2	comp11025_c0	.	.	.	.	.	.	.	.	.	.	.
comp11026_c0_seq1	1.14729	-1.23107	0.761483	1	1	4.16993	3	2	comp11026_c0	.	.	m.4514	1-309[-]	.	.	.	.	.	.
comp11027_c0_seq1	-0.79321	-1.16976	0.867375	1	2	3.45943	2	3.70044	comp11027_c0	.	.	.	.	.	.	.	.	.	.	.
comp11028_c0_seq1	0.754207	6.31423	0.61911	1	8.88264	11.7245	10.4543	11.2935	comp11028_c0	sp|Q2KIR1|SNRPA_BOVIN^Q2KIR1^Q:1306-1004,H:1-101^96.0396%ID^E:-93.0387^RecName: Full=U1 small nuclear ribonucleoprotein A;^Eukaryota; Metazoa; Chordata; Craniata; Vertebrata; Euteleostomi; Mammalia; Eutheria; Laurasiatheria; Cetartiodactyla; Ruminantia; Pecora; Bovidae; Bovinae; Bos	.	m.4515	467-1306[-]	sp|Q2KIR1|SNRPA_BOVIN^Q2KIR1^Q:1-279,H:1-282^78.2759%ID^E:-116.84^RecName: Full=U1 small nuclear ribonucleoprotein A;^Eukaryota; Metazoa; Chordata; Craniata; Vertebrata; Euteleostomi; Mammalia; Eutheria; Laurasiatheria; Cetartiodactyla; Ruminantia; Pecora; Bovidae; Bovinae; Bos	PF00076.17^RRM_1^RNA recognition motif. (a.k.a. RRM, RBD, or RNP domain)^12-82^E:4.7e-11`PF14259.1^RRM_6^RNA recognition motif (a.k.a. RRM, RBD, or RNP domain)^12-73^E:0.00028`PF13893.1^RRM_5^RNA recognition motif. (a.k.a. RRM, RBD, or RNP domain)^30-87^E:2.1e-10`PF00076.17^RRM_1^RNA recognition motif. (a.k.a. RRM, RBD, or RNP domain)^207-269^E:8.4e-14`PF14259.1^RRM_6^RNA recognition motif (a.k.a…	.	.	.	GO:0005681^cellular_component^spliceosomal complex`GO:0000166^molecular_function^nucleotide binding`GO:0003723^molecular_function^RNA binding`GO:0017069^molecular_function^snRNA binding`GO:0000398^biological_process^mRNA splicing, via spliceosome
comp11029_c0_seq1	6.36649	-0.956323	0.116292	1	-Inf	4.08746	3.70044	3.32193	comp11029_c0	.	.	.	.	.	.	.	.	.	.	.
comp11030_c0_seq1	-0.614747	-0.213759	0.849583	1	2.80735	5.83289	3	2.58496	comp11030_c0	sp|Q1D823|AGLZ_MYXXD^Q1D823^Q:97-306,H:746-815^34.2857%ID^E:-1.71^RecName: Full=Adventurous-gliding motility protein Z;^Bacteria; Proteobacteria; Deltaproteobacteria; Myxococcales; Cystobacterineae; Myxococcaceae; Myxococcus	.	m.4516	1-825[+]	sp|Q1D823|AGLZ_MYXXD^Q1D823^Q:33-102,H:746-815^34.2857%ID^E:-1.71^RecName: Full=Adventurous-gliding motility protein Z;^Bacteria; Proteobacteria; Deltaproteobacteria; Myxococcales; Cystobacterineae; Myxococcaceae; Myxococcus	PF00059.16^Lectin_C^Lectin C-type domain^209-267^E:3.1e-06	.	.	NOG12793^Calcium ion binding protein	GO:0005737^cellular_component^cytoplasm`GO:0000156^molecular_function^phosphorelay response regulator activity`GO:0035556^biological_process^intracellular signal transduction`GO:0006355^biological_process^regulation of transcription, DNA-dependent
comp11031_c0_seq1	-0.231239	0.690832	0.931325	1	4.32193	5.39232	4.90689	5.39232	comp11031_c0	.	.	.	.	.	.	.	.	.	.	.
comp11032_c0_seq1	2.3788	-0.644054	0.352905	1	1	4.58496	4.24793	2.80735	comp11032_c0	.	.	.	.	.	.	.	.	.	.	.
comp11033_c0_seq1	-2.45825	-0.748867	0.287305	1	4	4.16993	2.32193	2.32193	comp11033_c0	.	.	.	.	.	.	.	.	.	.	.
comp11037_c0_seq1	-1.10874	-1.44773	0.676585	1	2.32193	4	2	0	comp11037_c0	.	.	.	.	.	.	.	.	.	.	.
comp11039_c0_seq1	1.11407	-1.43377	0.769225	1	0	4.08746	2	2.32193	comp11039_c0	.	.	.	.	.	.	.	.	.	.	.
comp11041_c0_seq1	1.16469	-0.922624	0.599002	1	2	3.32193	4	3.16993	comp11041_c0	.	.	.	.	.	.	.	.	.	.	.
comp11042_c0_seq1	3.07197	-0.998913	0.200775	1	0	3.16993	4	3.45943	comp11042_c0	.	.	.	.	.	.	.	.	.	.	.
comp11043_c0_seq1	-0.136668	-0.746228	1	1	2.32193	4.08746	3	4	comp11043_c0	.	.	.	.	.	.	.	.	.	.	.
comp11044_c0_seq1	-0.785489	-1.34979	0.831855	1	1.58496	3.70044	1.58496	3.16993	comp11044_c0	.	.	.	.	.	.	.	.	.	.	.
comp11045_c0_seq1	6.25247	-1.46662	0.135018	1	-Inf	3	3.58496	2.32193	comp11045_c0	.	.	.	.	.	.	.	.	.	.	.
comp11048_c0_seq1	0.486037	-1.85501	1	1	1	2.58496	2.32193	2	comp11048_c0	sp|P11369|POL2_MOUSE^P11369^Q:70-17,H:663-680^88.8889%ID^E:-2.34^RecName: Full=Retrovirus-related Pol polyprotein LINE-1;^Eukaryota; Metazoa; Chordata; Craniata; Vertebrata; Euteleostomi; Mammalia; Eutheria; Euarchontoglires; Glires; Rodentia; Sciurognathi; Muroidea; Muridae; Murinae; Mus; Mus	.	.	.	.	.	.	.	.	GO:0004519^molecular_function^endonuclease activity`GO:0046872^molecular_function^metal ion binding`GO:0003723^molecular_function^RNA binding`GO:0003964^molecular_function^RNA-directed DNA polymerase activity`GO:0090305^biological_process^nucleic acid phosphodiester bond hydrolysis`GO:0006278^biological_process^RNA-dependent DNA replication	.
comp11049_c0_seq1	0.168352	-1.05776	1	1	0	4.58496	1	3.45943	comp11049_c0	.	.	m.4518	3-380[+]	.	PF02994.9^Transposase_22^L1 transposable element^4-92^E:7.6e-06	.	.	.	.
comp1105_c0_seq1	-2.34201	-1.74333	0.31674	1	3.16993	2.32193	1.58496	0	comp1105_c0	.	.	.	.	.	.	.	.	.	.	.
comp11050_c0_seq1	0.717353	-1.5972	1	1	0	3.80735	1.58496	2.32193	comp11050_c0	sp|O75037|KI21B_HUMAN^O75037^Q:255-55,H:479-544^64.1791%ID^E:-12.21^RecName: Full=Kinesin-like protein KIF21B;^Eukaryota; Metazoa; Chordata; Craniata; Vertebrata; Euteleostomi; Mammalia; Eutheria; Euarchontoglires; Primates; Haplorrhini; Catarrhini; Hominidae; Homo	.	.	.	.	.	.	.	COG2319^FOG: WD40 repeat	GO:0005737^cellular_component^cytoplasm`GO:0005874^cellular_component^microtubule`GO:0005875^cellular_component^microtubule associated complex`GO:0005524^molecular_function^ATP binding`GO:0003777^molecular_function^microtubule motor activity`GO:0007018^biological_process^microtubule-based movement	.
comp11051_c0_seq1	0.486037	-1.33476	1	1	1	3.32193	2.32193	3.45943	comp11051_c0	.	.	.	.	.	.	.	.	.	.	.
comp11052_c0_seq1	0.180742	-0.714601	1	1	3	3.80735	4	3	comp11052_c0	.	.	.	.	.	.	.	.	.	.	.
comp11054_c0_seq1	-1.33449	-1.19874	0.614069	1	1.58496	4.32193	1	3	comp11054_c0	.	.	.	.	.	.	.	.	.	.	.
comp11055_c0_seq1	0.486037	-1.22306	1	1	1	4.08746	2.32193	3	comp11055_c0	sp|Q5DU41|LRC8B_MOUSE^Q5DU41^Q:302-105,H:649-714^81.8182%ID^E:-31.9494^RecName: Full=Leucine-rich repeat-containing protein 8B;^Eukaryota; Metazoa; Chordata; Craniata; Vertebrata; Euteleostomi; Mammalia; Eutheria; Euarchontoglires; Glires; Rodentia; Sciurognathi; Muroidea; Muridae; Murinae; Mus; Mus	.	m.4519	3-302[-]	sp|Q5DU41|LRC8B_MOUSE^Q5DU41^Q:1-100,H:649-748^80%ID^E:-39.21^RecName: Full=Leucine-rich repeat-containing protein 8B;^Eukaryota; Metazoa; Chordata; Craniata; Vertebrata; Euteleostomi; Mammalia; Eutheria; Euarchontoglires; Glires; Rodentia; Sciurognathi; Muroidea; Muridae; Murinae; Mus; Mus	PF12799.2^LRR_4^Leucine Rich repeats (2 copies)^1-34^E:1.5e-07`PF13855.1^LRR_8^Leucine rich repeat^1-54^E:1e-09`PF13504.1^LRR_7^Leucine rich repeat^1-12^E:72`PF13306.1^LRR_5^Leucine rich repeats (6 copies)^6-79^E:0.0021`PF13516.1^LRR_6^Leucine Rich repeat^18-32^E:0.019`PF12799.2^LRR_4^Leucine Rich repeats (2 copies)^19-58^E:1.1e-09`PF13504.1^LRR_7^Leucine rich repeat^19-35^E:0.0063`PF00560.28^LRR…	.	.	COG4886^Leucine-rich repeat (LRR) protein	GO:0016021^cellular_component^integral to membrane
comp11056_c0_seq1	-0.584043	-0.993803	0.826935	1	2.58496	3.70044	2.80735	3.45943	comp11056_c0	.	.	.	.	.	.	.	.	.	.	.
comp11057_c0_seq1	-0.803369	-1.01568	0.757997	1	2.80735	3.58496	2.80735	3.32193	comp11057_c0	.	.	.	.	.	.	.	.	.	.	.
comp11058_c0_seq1	0.486037	-1.3783	1	1	1	4.45943	2.32193	-Inf	comp11058_c0	.	.	.	.	.	.	.	.	.	.	.
comp11060_c0_seq1	-0.164809	1.47024	0.948205	1	5.12928	6.70044	5.78136	5.67243	comp11060_c0	sp|Q9NR77|PXMP2_HUMAN^Q9NR77^Q:173-445,H:24-113^68.1319%ID^E:-58.2453^RecName: Full=Peroxisomal membrane protein 2;^Eukaryota; Metazoa; Chordata; Craniata; Vertebrata; Euteleostomi; Mammalia; Eutheria; Euarchontoglires; Primates; Haplorrhini; Catarrhini; Hominidae; Homo	.	m.4520	110-694[+]	sp|Q9NR77|PXMP2_HUMAN^Q9NR77^Q:11-194,H:13-195^67.3913%ID^E:-69^RecName: Full=Peroxisomal membrane protein 2;^Eukaryota; Metazoa; Chordata; Craniata; Vertebrata; Euteleostomi; Mammalia; Eutheria; Euarchontoglires; Primates; Haplorrhini; Catarrhini; Hominidae; Homo	PF04117.7^Mpv17_PMP22^Mpv17 / PMP22 family^128-193^E:3.9e-23	.	ExpAA=75.77^PredHel=3^Topology=o74-96i109-131o170-192i	.	GO:0016021^cellular_component^integral to membrane`GO:0005739^cellular_component^mitochondrion`GO:0005778^cellular_component^peroxisomal membrane`GO:0043234^cellular_component^protein complex
comp11063_c0_seq1	-1.09332	-0.560011	0.631846	1	3.45943	4.75489	3.16993	2.80735	comp11063_c0	sp|Q54CE6|Y1725_DICDI^Q54CE6^Q:51-257,H:18-84^30.4348%ID^E:-0.2^RecName: Full=Putative uncharacterized transmembrane protein DDB_G0293028;^Eukaryota; Amoebozoa; Mycetozoa; Dictyosteliida; Dictyostelium	.	.	.	.	.	.	.	.	GO:0016021^cellular_component^integral to membrane	.
comp11064_c0_seq1	-0.0930155	6.00505	0.951216	1	9.37504	11.0485	10.0993	10.9226	comp11064_c0	sp|Q5BIN5|PIN1_BOVIN^Q5BIN5^Q:967-491,H:1-163^85.2761%ID^E:-75.22^RecName: Full=Peptidyl-prolyl cis-trans isomerase NIMA-interacting 1;^Eukaryota; Metazoa; Chordata; Craniata; Vertebrata; Euteleostomi; Mammalia; Eutheria; Laurasiatheria; Cetartiodactyla; Ruminantia; Pecora; Bovidae; Bovinae; Bos	.	m.4525	240-596[+]	.	.	.	.	.	.
comp11064_c0_seq1	-0.0930155	6.00505	0.951216	1	9.37504	11.0485	10.0993	10.9226	comp11064_c0	sp|Q5BIN5|PIN1_BOVIN^Q5BIN5^Q:967-491,H:1-163^85.2761%ID^E:-75.22^RecName: Full=Peptidyl-prolyl cis-trans isomerase NIMA-interacting 1;^Eukaryota; Metazoa; Chordata; Craniata; Vertebrata; Euteleostomi; Mammalia; Eutheria; Laurasiatheria; Cetartiodactyla; Ruminantia; Pecora; Bovidae; Bovinae; Bos	.	m.4524	488-967[-]	sp|Q5BIN5|PIN1_BOVIN^Q5BIN5^Q:1-159,H:1-163^85.2761%ID^E:-75.81^RecName: Full=Peptidyl-prolyl cis-trans isomerase NIMA-interacting 1;^Eukaryota; Metazoa; Chordata; Craniata; Vertebrata; Euteleostomi; Mammalia; Eutheria; Laurasiatheria; Cetartiodactyla; Ruminantia; Pecora; Bovidae; Bovinae; Bos	PF00397.21^WW^WW domain^7-37^E:7.1e-13`PF13616.1^Rotamase_3^PPIC-type PPIASE domain^47-155^E:2.3e-22`PF00639.16^Rotamase^PPIC-type PPIASE domain^55-158^E:9.1e-25	.	.	COG0760^Parvulin-like peptidyl-prolyl isomerase	GO:0005737^cellular_component^cytoplasm`GO:0030496^cellular_component^midbody`GO:0016607^cellular_component^nuclear speck`GO:0003755^molecular_function^peptidyl-prolyl cis-trans isomerase activity`GO:0007049^biological_process^cell cycle`GO:2000146^biological_process^negative regulation of cell motility`GO:0070373^biological_process^negative regulation of ERK1 and ERK2 cascade`GO:0030512^biologic…
comp11065_c0_seq1	0.899575	-1.31641	0.723479	1	1.58496	3	3.32193	2.80735	comp11065_c0	.	.	.	.	.	.	.	.	.	.	.
comp11066_c0_seq1	-0.785489	-1.68547	0.83307	1	1.58496	2.80735	1.58496	2.80735	comp11066_c0	.	.	.	.	.	.	.	.	.	.	.
comp11067_c0_seq1	-1.10874	-1.79335	0.679407	1	2.32193	3	2	0	comp11067_c0	.	.	.	.	.	.	.	.	.	.	.
comp11068_c0_seq1	-0.696384	5.49278	0.644157	1	9.13186	10.5765	9.25267	10.374	comp11068_c0	sp|Q6DK72|SUMO3_XENTR^Q6DK72^Q:1146-874,H:4-94^94.5055%ID^E:-42.5^RecName: Full=Small ubiquitin-related modifier 3;^Eukaryota; Metazoa; Chordata; Craniata; Vertebrata; Euteleostomi; Amphibia; Batrachia; Anura; Pipoidea; Pipidae; Xenopodinae; Xenopus; Silurana	.	m.4526	871-1227[-]	sp|Q6DK72|SUMO3_XENTR^Q6DK72^Q:28-118,H:4-94^94.5055%ID^E:-43.39^RecName: Full=Small ubiquitin-related modifier 3;^Eukaryota; Metazoa; Chordata; Craniata; Vertebrata; Euteleostomi; Amphibia; Batrachia; Anura; Pipoidea; Pipidae; Xenopodinae; Xenopus; Silurana	PF11976.3^Rad60-SLD^Ubiquitin-2 like Rad60 SUMO-like^41-109^E:6.1e-25`PF00240.18^ubiquitin^Ubiquitin family^49-113^E:4.3e-11	.	.	COG5227^Ubiquitin-like protein (sentrin)	GO:0005737^cellular_component^cytoplasm
comp11068_c0_seq2	-0.319282	6.48185	0.833679	1	10.1548	11.5718	10.6528	11.1039	comp11068_c0	sp|Q7SZ22|SUMO3_XENLA^Q7SZ22^Q:1155-874,H:1-94^95.7447%ID^E:-44.99^RecName: Full=Small ubiquitin-related modifier 3;^Eukaryota; Metazoa; Chordata; Craniata; Vertebrata; Euteleostomi; Amphibia; Batrachia; Anura; Pipoidea; Pipidae; Xenopodinae; Xenopus; Xenopus	.	.	.	.	.	.	.	.	GO:0005737^cellular_component^cytoplasm	.
comp11069_c0_seq1	-3.21041	-1.68217	0.322199	1	2.58496	3.16993	0	2	comp11069_c0	.	.	.	.	.	.	.	.	.	.	.
comp1107_c0_seq1	0.74162	-2.08275	0.870347	1	1	1	2.58496	1.58496	comp1107_c0	.	.	.	.	.	.	.	.	.	.	.
comp11070_c0_seq1	0.168352	-1.56648	1	1	0	3.32193	1	3.32193	comp11070_c0	.	.	.	.	.	.	.	.	.	.	.
comp11071_c0_seq1	-0.00976039	-1.47076	1	1	2	3.58496	2.80735	1	comp11071_c0	.	.	.	.	.	.	.	.	.	.	.
comp11072_c0_seq1	-0.803369	-0.836101	0.757829	1	2.80735	4.58496	2.80735	2.58496	comp11072_c0	.	.	m.4527	1-438[-]	sp|Q14159|K0146_HUMAN^Q14159^Q:87-101,H:121-135^60%ID^E:-1.05744^RecName: Full=Uncharacterized protein KIAA0146;^Eukaryota; Metazoa; Chordata; Craniata; Vertebrata; Euteleostomi; Mammalia; Eutheria; Euarchontoglires; Primates; Haplorrhini; Catarrhini; Hominidae; Homo	.	.	.	.	.
comp11073_c0_seq1	0.239891	0.222168	0.933589	1	3.58496	5.24793	4.64386	4.52356	comp11073_c0	.	.	.	.	.	.	.	.	.	.	.
comp11076_c0_seq1	0.315052	-0.725102	1	1	2.32193	4.16993	3.45943	3.70044	comp11076_c0	.	.	.	.	.	.	.	.	.	.	.
comp11078_c0_seq1	0.386754	0.0711669	0.853069	1	3.70044	4.52356	4.90689	4.16993	comp11078_c0	.	.	.	.	.	.	.	.	.	.	.
comp11079_c0_seq1	-0.32529	-1.70543	0.90812	1	2.32193	2	2.80735	1.58496	comp11079_c0	.	.	.	.	.	.	.	.	.	.	.
comp11080_c0_seq1	0.168352	-2.07736	1	1	0	3.16993	1	1	comp11080_c0	.	.	.	.	.	.	.	.	.	.	.
comp11081_c0_seq1	-7.99502	-1.35039	0.027936	0.603606	4.52356	-Inf	-Inf	-Inf	comp11081_c0	sp|Q2NKZ4|TKTL2_BOVIN^Q2NKZ4^Q:3-224,H:202-275^58.1081%ID^E:-22.4^RecName: Full=Transketolase-like protein 2;^Eukaryota; Metazoa; Chordata; Craniata; Vertebrata; Euteleostomi; Mammalia; Eutheria; Laurasiatheria; Cetartiodactyla; Ruminantia; Pecora; Bovidae; Bovinae; Bos	.	.	.	.	.	.	.	COG0021^Transketolase	GO:0005737^cellular_component^cytoplasm`GO:0046872^molecular_function^metal ion binding`GO:0004802^molecular_function^transketolase activity	.
comp11083_c0_seq1	0.0303878	0.0764527	1	1	3.32193	5.24793	4.16993	4.52356	comp11083_c0	sp|O15265|ATX7_HUMAN^O15265^Q:688-554,H:848-892^77.7778%ID^E:-21.3979^RecName: Full=Ataxin-7;^Eukaryota; Metazoa; Chordata; Craniata; Vertebrata; Euteleostomi; Mammalia; Eutheria; Euarchontoglires; Primates; Haplorrhini; Catarrhini; Hominidae; Homo	.	.	.	.	.	.	.	.	GO:0005737^cellular_component^cytoplasm`GO:0015630^cellular_component^microtubule cytoskeleton`GO:0016363^cellular_component^nuclear matrix`GO:0005634^cellular_component^nucleus`GO:0003682^molecular_function^chromatin binding`GO:0008270^molecular_function^zinc ion binding`GO:0008219^biological_process^cell death`GO:0016578^biological_process^histone deubiquitination`GO:0000226^biological_process^…	.
comp11085_c0_seq1	0.868414	-0.564613	0.698413	1	2	4.90689	3.70044	3.16993	comp11085_c0	sp|Q68UT7|HUNK_PANTR^Q68UT7^Q:147-269,H:603-644^38.6364%ID^E:-0.49^RecName: Full=Hormonally up-regulated neu tumor-associated kinase;^Eukaryota; Metazoa; Chordata; Craniata; Vertebrata; Euteleostomi; Mammalia; Eutheria; Euarchontoglires; Primates; Haplorrhini; Catarrhini; Hominidae; Pan	.	.	.	.	.	.	.	COG0515^Serine/threonine protein kinase	GO:0005524^molecular_function^ATP binding`GO:0004674^molecular_function^protein serine/threonine kinase activity	.
comp11086_c0_seq1	1.40012	4.43025	0.397021	1	6.91886	9.48985	9.13699	9.27845	comp11086_c0	sp|Q5F495|PHOCN_CHICK^Q5F495^Q:55-702,H:1-216^98.1481%ID^E:-124.15^RecName: Full=MOB-like protein phocein;^Eukaryota; Metazoa; Chordata; Craniata; Vertebrata; Euteleostomi; Archosauria; Dinosauria; Saurischia; Theropoda; Coelurosauria; Aves; Neognathae; Galliformes; Phasianidae; Phasianinae; Gallus	.	m.4529	1-732[+]	sp|Q9Y3A3|PHOCN_HUMAN^Q9Y3A3^Q:19-243,H:1-225^97.3333%ID^E:-128.65^RecName: Full=MOB-like protein phocein;^Eukaryota; Metazoa; Chordata; Craniata; Vertebrata; Euteleostomi; Mammalia; Eutheria; Euarchontoglires; Primates; Haplorrhini; Catarrhini; Hominidae; Homo	PF03637.12^Mob1_phocein^Mob1/phocein family^58-226^E:2.4e-60	.	.	.	GO:0005794^cellular_component^Golgi apparatus`GO:0032580^cellular_component^Golgi cisterna membrane`GO:0048471^cellular_component^perinuclear region of cytoplasm`GO:0046872^molecular_function^metal ion binding`GO:0006810^biological_process^transport
comp1109_c0_seq1	1.42489	-1.50053	0.615835	1	0	4.32193	2.32193	-Inf	comp1109_c0	.	.	.	.	.	.	.	.	.	.	.
comp11091_c0_seq1	-6.85349	0.367679	0.0154831	0.487602	6.24793	-Inf	0	-Inf	comp11091_c0	sp|P61204|ARF3_HUMAN^P61204^Q:581-171,H:45-181^93.4307%ID^E:-70.28^RecName: Full=ADP-ribosylation factor 3;^Eukaryota; Metazoa; Chordata; Craniata; Vertebrata; Euteleostomi; Mammalia; Eutheria; Euarchontoglires; Primates; Haplorrhini; Catarrhini; Hominidae; Homo	.	m.4531	168-581[-]	sp|P61205|ARF3_MOUSE^P61205^Q:1-137,H:45-181^93.4307%ID^E:-70.64^RecName: Full=ADP-ribosylation factor 3;^Eukaryota; Metazoa; Chordata; Craniata; Vertebrata; Euteleostomi; Mammalia; Eutheria; Euarchontoglires; Glires; Rodentia; Sciurognathi; Muroidea; Muridae; Murinae; Mus; Mus	PF00025.16^Arf^ADP-ribosylation factor family^1-132^E:2.3e-59`PF00071.17^Ras^Ras family^3-120^E:7.8e-10`PF04670.7^Gtr1_RagA^Gtr1/RagA G protein conserved region^4-99^E:7.8e-07`PF08477.8^Miro^Miro-like protein^5-85^E:5.9e-06`PF09439.5^SRPRB^Signal recognition particle receptor beta subunit^13-99^E:2e-07	.	.	.	GO:0005794^cellular_component^Golgi apparatus`GO:0048471^cellular_component^perinuclear region of cytoplasm`GO:0005525^molecular_function^GTP binding`GO:0015031^biological_process^protein transport`GO:0007264^biological_process^small GTPase mediated signal transduction`GO:0016192^biological_process^vesicle-mediated transport
comp11092_c0_seq1	-9.14078	-0.256227	0.00942998	0.438971	5.67243	-Inf	-Inf	-Inf	comp11092_c0	sp|Q9GLG2|CAN1_MACFA^Q9GLG2^Q:3-104,H:679-712^52.9412%ID^E:-3.27^RecName: Full=Calpain-1 catalytic subunit;^Eukaryota; Metazoa; Chordata; Craniata; Vertebrata; Euteleostomi; Mammalia; Eutheria; Euarchontoglires; Primates; Haplorrhini; Catarrhini; Cercopithecidae; Cercopithecinae; Macaca	.	.	.	.	.	.	.	.	GO:0005737^cellular_component^cytoplasm`GO:0005886^cellular_component^plasma membrane`GO:0005509^molecular_function^calcium ion binding`GO:0004198^molecular_function^calcium-dependent cysteine-type endopeptidase activity`GO:0006508^biological_process^proteolysis	.
comp11094_c0_seq1	-1.73893	-1.61368	0.508647	1	2	3.58496	1	2	comp11094_c0	.	.	.	.	.	.	.	.	.	.	.
comp11095_c0_seq1	-1.18993	-1.62948	0.70747	1	2	3.80735	1.58496	0	comp11095_c0	sp|Q5RDS0|PLPL6_PONAB^Q5RDS0^Q:205-2,H:284-351^85.2941%ID^E:-24.03^RecName: Full=Neuropathy target esterase;^Eukaryota; Metazoa; Chordata; Craniata; Vertebrata; Euteleostomi; Mammalia; Eutheria; Euarchontoglires; Primates; Haplorrhini; Catarrhini; Hominidae; Pongo	.	.	.	.	.	.	.	.	GO:0005789^cellular_component^endoplasmic reticulum membrane`GO:0016021^cellular_component^integral to membrane`GO:0004622^molecular_function^lysophospholipase activity`GO:0016042^biological_process^lipid catabolic process`GO:0046470^biological_process^phosphatidylcholine metabolic process	.
comp11096_c0_seq1	0.552885	-1.30414	0.864997	1	2.32193	1	3.70044	2.80735	comp11096_c0	.	.	.	.	.	.	.	.	.	.	.
comp11097_c0_seq1	-1.48072	-0.753247	0.464032	1	4	3.16993	3.32193	2.80735	comp11097_c0	.	.	.	.	.	.	.	.	.	.	.
comp11098_c0_seq1	2.53786	-1.49179	0.319947	1	0	2.58496	3.45943	2.58496	comp11098_c0	.	.	.	.	.	.	.	.	.	.	.
comp11099_c0_seq1	1.03502	-0.985814	0.722302	1	1.58496	3.16993	3.45943	3.80735	comp11099_c0	.	.	.	.	.	.	.	.	.	.	.
comp111_c0_seq1	-1.6677	-1.57533	0.769834	1	1	3.58496	0	3	comp111_c0	sp|Q1KYK9|WNT7A_MACFA^Q1KYK9^Q:1-210,H:280-349^88.5714%ID^E:-36.32^RecName: Full=Protein Wnt-7a;^Eukaryota; Metazoa; Chordata; Craniata; Vertebrata; Euteleostomi; Mammalia; Eutheria; Euarchontoglires; Primates; Haplorrhini; Catarrhini; Cercopithecidae; Cercopithecinae; Macaca	.	.	.	.	.	.	.	.	GO:0005578^cellular_component^proteinaceous extracellular matrix`GO:0007275^biological_process^multicellular organismal development`GO:0016055^biological_process^Wnt receptor signaling pathway	.
comp11100_c0_seq1	0.403287	1.2516	0.859952	1	4.16993	6.59991	5.39232	5.90689	comp11100_c0	sp|Q9QZ73|DCNL1_MOUSE^Q9QZ73^Q:493-404,H:230-259^96.6667%ID^E:-9.68^RecName: Full=DCN1-like protein 1;^Eukaryota; Metazoa; Chordata; Craniata; Vertebrata; Euteleostomi; Mammalia; Eutheria; Euarchontoglires; Glires; Rodentia; Sciurognathi; Muroidea; Muridae; Murinae; Mus; Mus	.	.	.	.	.	.	.	.	.	.
comp11101_c0_seq1	-0.229557	-0.729335	0.941609	1	3	4.70044	3.58496	1	comp11101_c0	sp|Q9TTC1|POL_KORV^Q9TTC1^Q:58-84,H:110-118^66.6667%ID^E:-4.75798^RecName: Full=Pro-Pol polyprotein;^Viruses; Retro-transcribing viruses; Retroviridae; Orthoretrovirinae; Gammaretrovirus; unclassified Gammaretrovirus	.	.	.	.	.	.	.	.	GO:0030430^cellular_component^host cell cytoplasm`GO:0042025^cellular_component^host cell nucleus`GO:0019012^cellular_component^virion`GO:0004190^molecular_function^aspartic-type endopeptidase activity`GO:0003887^molecular_function^DNA-directed DNA polymerase activity`GO:0046872^molecular_function^metal ion binding`GO:0004523^molecular_function^ribonuclease H activity`GO:0003723^molecular_functio…	.
comp11102_c0_seq1	-1.89181	1.62453	0.369081	1	5.78136	7.10852	4.70044	5.75489	comp11102_c0	sp|Q86VW2|ARHGP_HUMAN^Q86VW2^Q:588-451,H:1-47^68.0851%ID^E:-11.8383^RecName: Full=Rho guanine nucleotide exchange factor 25;^Eukaryota; Metazoa; Chordata; Craniata; Vertebrata; Euteleostomi; Mammalia; Eutheria; Euarchontoglires; Primates; Haplorrhini; Catarrhini; Hominidae; Homo	.	m.4532	1-717[-]	sp|Q86VW2|ARHGP_HUMAN^Q86VW2^Q:44-127,H:1-90^53.3333%ID^E:-17.0677^RecName: Full=Rho guanine nucleotide exchange factor 25;^Eukaryota; Metazoa; Chordata; Craniata; Vertebrata; Euteleostomi; Mammalia; Eutheria; Euarchontoglires; Primates; Haplorrhini; Catarrhini; Hominidae; Homo	.	.	.	.	GO:0005829^cellular_component^cytosol`GO:0030016^cellular_component^myofibril`GO:0005886^cellular_component^plasma membrane`GO:0030017^cellular_component^sarcomere`GO:0005543^molecular_function^phospholipid binding`GO:0005089^molecular_function^Rho guanyl-nucleotide exchange factor activity`GO:0035023^biological_process^regulation of Rho protein signal transduction
comp11103_c0_seq1	0.468155	-0.273981	0.837474	1	3.16993	4.45943	4.45943	3.70044	comp11103_c0	.	.	.	.	.	.	.	.	.	.	.
comp11104_c0_seq1	2.08614	-1.3554	0.426633	1	0	2.58496	3	3.58496	comp11104_c0	sp|O75820|ZN189_HUMAN^O75820^Q:2-88,H:282-310^65.5172%ID^E:-5.7^RecName: Full=Zinc finger protein 189;^Eukaryota; Metazoa; Chordata; Craniata; Vertebrata; Euteleostomi; Mammalia; Eutheria; Euarchontoglires; Primates; Haplorrhini; Catarrhini; Hominidae; Homo	.	.	.	.	.	.	.	COG5048^FOG: Zn-finger	GO:0005634^cellular_component^nucleus`GO:0003677^molecular_function^DNA binding`GO:0046872^molecular_function^metal ion binding`GO:0003700^molecular_function^sequence-specific DNA binding transcription factor activity`GO:0008270^molecular_function^zinc ion binding`GO:0000122^biological_process^negative regulation of transcription from RNA polymerase II promoter`GO:0006351^biological_process^trans…	.
comp11106_c0_seq1	1.12828	7.80019	0.509635	1	10.2738	13.4804	12.2195	12.3559	comp11106_c0	sp|Q04637|IF4G1_HUMAN^Q04637^Q:1917-2306,H:1047-1177^73.4848%ID^E:-10000^RecName: Full=Eukaryotic translation initiation factor 4 gamma 1;^Eukaryota; Metazoa; Chordata; Craniata; Vertebrata; Euteleostomi; Mammalia; Eutheria; Euarchontoglires; Primates; Haplorrhini; Catarrhini; Hominidae; Homo	.	m.4535	3-3641[+]	sp|Q80XI3|IF4G3_MOUSE^Q80XI3^Q:5-33,H:524-552^24.1379%ID^E:-10000^RecName: Full=Eukaryotic translation initiation factor 4 gamma 3;^Eukaryota; Metazoa; Chordata; Craniata; Vertebrata; Euteleostomi; Mammalia; Eutheria; Euarchontoglires; Glires; Rodentia; Sciurognathi; Muroidea; Muridae; Murinae; Mus; Mus	PF02854.14^MIF4G^MIF4G domain^343-568^E:2.4e-66`PF02847.12^MA3^MA3 domain^855-967^E:3.3e-25`PF02020.13^W2^eIF4-gamma/eIF5/eIF2-epsilon^1132-1211^E:4.5e-17	.	.	.	GO:0003677^molecular_function^DNA binding`GO:0003743^molecular_function^translation initiation factor activity`GO:0007128^biological_process^meiotic prophase I`GO:0001934^biological_process^positive regulation of protein phosphorylation`GO:0045727^biological_process^positive regulation of translation`GO:0016070^biological_process^RNA metabolic process`GO:0007283^biological_process^spermatogenesis
comp11107_c0_seq1	-5.00237	-0.891923	0.0692421	0.914116	4.39232	3.45943	0	2	comp11107_c0	.	.	.	.	.	.	.	.	.	.	.
comp11108_c0_seq1	1.46356	-1.439	0.605656	1	1	2.58496	3.32193	2.80735	comp11108_c0	.	.	.	.	.	.	.	.	.	.	.
comp11109_c0_seq1	1.14729	-1.66191	0.763675	1	1	1.58496	3	2.80735	comp11109_c0	.	.	.	.	.	.	.	.	.	.	.
comp1111_c0_seq1	5.01568	-1.97598	0.340631	1	-Inf	2	2.32193	2.58496	comp1111_c0	.	.	.	.	.	.	.	.	.	.	.
comp11110_c0_seq1	-0.477602	0.324009	0.837937	1	4.24793	4.9542	4.58496	4.75489	comp11110_c0	.	.	.	.	.	.	.	.	.	.	.
comp11111_c0_seq1	5.67693	-1.14686	0.214926	1	-Inf	3.90689	3	3.45943	comp11111_c0	.	.	.	.	.	.	.	.	.	.	.
comp11113_c0_seq1	1.09177	6.78439	0.48403	1	9.2738	12.1128	11.183	11.6991	comp11113_c0	.	.	m.4542	434-907[-]	.	.	.	.	.	.
comp11113_c0_seq1	1.09177	6.78439	0.48403	1	9.2738	12.1128	11.183	11.6991	comp11113_c0	.	.	m.4546	2376-2726[+]	sp|A1R516|IF2_ARTAT^A1R516^Q:73-104,H:209-240^50%ID^E:-0.13^RecName: Full=Translation initiation factor IF-2;^Bacteria; Actinobacteria; Actinobacteridae; Actinomycetales; Micrococcineae; Micrococcaceae; Arthrobacter	.	.	.	COG0532^Translation initiation factor 2 (IF-2; GTPase)	GO:0005737^cellular_component^cytoplasm`GO:0005525^molecular_function^GTP binding`GO:0003924^molecular_function^GTPase activity`GO:0003743^molecular_function^translation initiation factor activity`GO:0006184^biological_process^GTP catabolic process
comp11113_c0_seq1	1.09177	6.78439	0.48403	1	9.2738	12.1128	11.183	11.6991	comp11113_c0	.	.	m.4540	368-862[+]	.	.	.	.	.	.
comp11114_c0_seq1	0.616761	-0.382112	0.797093	1	2.80735	3.58496	4.24793	4.39232	comp11114_c0	.	.	.	.	.	.	.	.	.	.	.
comp11115_c0_seq1	2.25293	-1.5136	0.367537	1	0	3.16993	3.16993	2.32193	comp11115_c0	.	.	.	.	.	.	.	.	.	.	.
comp11116_c0_seq1	-1.67203	2.65863	0.404826	1	6.44294	8.93958	5.58496	5	comp11116_c0	.	.	.	.	.	.	.	.	.	.	.
comp11118_c0_seq1	-8.51414	-0.87954	0.015912	0.492839	5.04439	-Inf	-Inf	-Inf	comp11118_c0	sp|A2VDN0|ITM2C_BOVIN^A2VDN0^Q:340-161,H:209-268^58.3333%ID^E:-13.82^RecName: Full=Integral membrane protein 2C;^Eukaryota; Metazoa; Chordata; Craniata; Vertebrata; Euteleostomi; Mammalia; Eutheria; Laurasiatheria; Cetartiodactyla; Ruminantia; Pecora; Bovidae; Bovinae; Bos	.	.	.	.	.	.	.	.	GO:0005794^cellular_component^Golgi apparatus`GO:0016021^cellular_component^integral to membrane`GO:0005765^cellular_component^lysosomal membrane`GO:0005764^cellular_component^lysosome`GO:0048471^cellular_component^perinuclear region of cytoplasm`GO:0005886^cellular_component^plasma membrane`GO:0005524^molecular_function^ATP binding`GO:0001540^molecular_function^beta-amyloid binding`GO:0012502^bi…	.
comp11119_c0_seq1	-0.0791436	-1.34122	1	1	2.58496	3	3.32193	1.58496	comp11119_c0	.	.	.	.	.	.	.	.	.	.	.
comp1112_c0_seq1	0.0301205	-1.91218	1	1	2.32193	-Inf	3.16993	0	comp1112_c0	.	.	.	.	.	.	.	.	.	.	.
comp11120_c0_seq1	0.927166	7.51323	0.575109	1	10.7398	12.9905	12.4843	11.0147	comp11120_c0	sp|O75787|RENR_HUMAN^O75787^Q:3375-2947,H:168-308^80.4196%ID^E:-138.901^RecName: Full=Renin receptor;^Eukaryota; Metazoa; Chordata; Craniata; Vertebrata; Euteleostomi; Mammalia; Eutheria; Euarchontoglires; Primates; Haplorrhini; Catarrhini; Hominidae; Homo	.	m.4549	2818-3885[-]	sp|O75787|RENR_HUMAN^O75787^Q:9-355,H:5-350^77.6504%ID^E:-155.76^RecName: Full=Renin receptor;^Eukaryota; Metazoa; Chordata; Craniata; Vertebrata; Euteleostomi; Mammalia; Eutheria; Euarchontoglires; Primates; Haplorrhini; Catarrhini; Hominidae; Homo	PF07850.9^Renin_r^Renin receptor-like protein^256-355^E:1.5e-44	sigP:1^20^0.799^YES	ExpAA=30.37^PredHel=1^Topology=o314-336i	.	GO:0009897^cellular_component^external side of plasma membrane`GO:0016021^cellular_component^integral to membrane`GO:0004872^molecular_function^receptor activity`GO:0002003^biological_process^angiotensin maturation`GO:0032914^biological_process^positive regulation of transforming growth factor beta1 production`GO:0043408^biological_process^regulation of MAPK cascade
comp11122_c0_seq1	1.16988	2.25608	0.564998	1	5.08746	7.06609	7.07682	6.94251	comp11122_c0	.	.	.	.	.	.	.	.	.	.	.
comp11123_c0_seq1	-8.17124	-1.19579	0.0231705	0.560834	4.70044	-Inf	-Inf	-Inf	comp11123_c0	sp|Q6GP80|NOP16_XENLA^Q6GP80^Q:144-7,H:23-68^69.5652%ID^E:-11.26^RecName: Full=Nucleolar protein 16;^Eukaryota; Metazoa; Chordata; Craniata; Vertebrata; Euteleostomi; Amphibia; Batrachia; Anura; Pipoidea; Pipidae; Xenopodinae; Xenopus; Xenopus	.	.	.	.	.	.	.	.	GO:0005730^cellular_component^nucleolus	.
comp11124_c0_seq1	-0.592872	5.16587	0.698532	1	9.04712	10.3421	9.27146	9.53916	comp11124_c0	sp|Q0MQD2|NDUB3_PANTR^Q0MQD2^Q:83-367,H:4-98^58.9474%ID^E:-31.11^RecName: Full=NADH dehydrogenase [ubiquinone] 1 beta subcomplex subunit 3;^Eukaryota; Metazoa; Chordata; Craniata; Vertebrata; Euteleostomi; Mammalia; Eutheria; Euarchontoglires; Primates; Haplorrhini; Catarrhini; Hominidae; Pan	.	m.4552	2-370[+]	sp|Q9CQZ6|NDUB3_MOUSE^Q9CQZ6^Q:24-122,H:4-104^62.3762%ID^E:-33.54^RecName: Full=NADH dehydrogenase [ubiquinone] 1 beta subcomplex subunit 3;^Eukaryota; Metazoa; Chordata; Craniata; Vertebrata; Euteleostomi; Mammalia; Eutheria; Euarchontoglires; Glires; Rodentia; Sciurognathi; Muroidea; Muridae; Murinae; Mus; Mus	PF08122.7^NDUF_B12^NADH-ubiquinone oxidoreductase B12 subunit family^65-121^E:1.1e-20	.	.	.	GO:0016021^cellular_component^integral to membrane`GO:0005743^cellular_component^mitochondrial inner membrane`GO:0005747^cellular_component^mitochondrial respiratory chain complex I`GO:0008137^molecular_function^NADH dehydrogenase (ubiquinone) activity`GO:0022900^biological_process^electron transport chain
comp11125_c0_seq1	-1.50545	-1.43259	0.532515	1	2.32193	3.80735	1.58496	2	comp11125_c0	.	.	.	.	.	.	.	.	.	.	.
comp11127_c0_seq1	-0.105939	-0.552987	1	1	3.45943	3.58496	4.16993	3.32193	comp11127_c0	.	.	m.4553	159-500[+]	.	.	.	.	.	.
comp11127_c0_seq2	3.07197	-1.01004	0.200811	1	0	4.39232	4	0	comp11127_c0	.	.	.	.	.	.	.	.	.	.	.
comp11128_c0_seq1	0.180471	-0.693689	0.941624	1	2.80735	4.24793	3.80735	3	comp11128_c0	.	.	.	.	.	.	.	.	.	.	.
comp11129_c0_seq1	-0.99371	-0.620365	0.645695	1	3	4.08746	2.80735	4.16993	comp11129_c0	.	.	.	.	.	.	.	.	.	.	.
comp11130_c0_seq1	1.27257	2.45565	0.533108	1	5.24793	7.76155	7.33985	6.61471	comp11130_c0	.	.	.	.	.	.	.	.	.	.	.
comp11131_c0_seq1	0.0301205	-0.57928	1	1	2.32193	4	3.16993	4.45943	comp11131_c0	.	.	.	.	.	.	.	.	.	.	.
comp11133_c0_seq1	-2.6289	-0.963471	0.260987	1	3.45943	4.16993	1.58496	2.58496	comp11133_c0	.	.	.	.	.	.	.	.	.	.	.
comp11134_c0_seq1	-0.0513292	0.0692421	1	1	3.32193	5.16993	4.08746	4.64386	comp11134_c0	.	.	m.4555	2-901[-]	.	.	.	.	.	.
comp11135_c0_seq1	-0.797918	-1.66609	0.801694	1	2.32193	2.58496	2.32193	2	comp11135_c0	.	.	.	.	.	.	.	.	.	.	.
comp11137_c0_seq1	-0.209954	7.70204	0.900385	1	11.1935	13.1057	11.8009	12.239	comp11137_c0	sp|Q13232|NDK3_HUMAN^Q13232^Q:57-563,H:1-169^73.3728%ID^E:-70.96^RecName: Full=Nucleoside diphosphate kinase 3;^Eukaryota; Metazoa; Chordata; Craniata; Vertebrata; Euteleostomi; Mammalia; Eutheria; Euarchontoglires; Primates; Haplorrhini; Catarrhini; Hominidae; Homo	.	m.4556	3-566[+]	sp|Q13232|NDK3_HUMAN^Q13232^Q:19-187,H:1-169^73.3728%ID^E:-71.93^RecName: Full=Nucleoside diphosphate kinase 3;^Eukaryota; Metazoa; Chordata; Craniata; Vertebrata; Euteleostomi; Mammalia; Eutheria; Euarchontoglires; Primates; Haplorrhini; Catarrhini; Hominidae; Homo	PF00334.14^NDK^Nucleoside diphosphate kinase^40-173^E:1.2e-54	.	ExpAA=23.40^PredHel=1^Topology=i13-35o	COG0105^Nucleoside diphosphate kinase	GO:0005739^cellular_component^mitochondrion`GO:0005524^molecular_function^ATP binding`GO:0046872^molecular_function^metal ion binding`GO:0004550^molecular_function^nucleoside diphosphate kinase activity`GO:0006915^biological_process^apoptotic process`GO:0006241^biological_process^CTP biosynthetic process`GO:0006183^biological_process^GTP biosynthetic process`GO:0006917^biological_process^inductio…
comp11138_c0_seq1	-0.463789	6.08162	0.757565	1	9.73132	11.314	10.0848	10.7125	comp11138_c0	sp|Q5XH16|NH2L1_XENLA^Q5XH16^Q:287-481,H:64-128^98.4615%ID^E:-57.058^RecName: Full=NHP2-like protein 1;^Eukaryota; Metazoa; Chordata; Craniata; Vertebrata; Euteleostomi; Amphibia; Batrachia; Anura; Pipoidea; Pipidae; Xenopodinae; Xenopus; Xenopus	.	m.4560	98-484[+]	sp|Q5XH16|NH2L1_XENLA^Q5XH16^Q:1-128,H:1-128^97.6562%ID^E:-64.49^RecName: Full=NHP2-like protein 1;^Eukaryota; Metazoa; Chordata; Craniata; Vertebrata; Euteleostomi; Amphibia; Batrachia; Anura; Pipoidea; Pipidae; Xenopodinae; Xenopus; Xenopus	PF08228.6^RNase_P_pop3^RNase P subunit Pop3^4-125^E:0.00017`PF01248.21^Ribosomal_L7Ae^Ribosomal protein L7Ae/L30e/S12e/Gadd45 family^22-111^E:1.3e-25	.	.	.	GO:0005730^cellular_component^nucleolus`GO:0005681^cellular_component^spliceosomal complex`GO:0003723^molecular_function^RNA binding`GO:0006397^biological_process^mRNA processing`GO:0042254^biological_process^ribosome biogenesis`GO:0008380^biological_process^RNA splicing
comp11140_c0_seq1	2.25293	-1.44543	0.366831	1	0	-Inf	3.16993	3.80735	comp11140_c0	.	.	.	.	.	.	.	.	.	.	.
comp11141_c0_seq1	-0.0779528	-1.57453	1	1	1.58496	2.58496	2.32193	3	comp11141_c0	.	.	.	.	.	.	.	.	.	.	.
comp11143_c0_seq1	0.816997	7.64671	0.625661	1	10.3454	12.9935	11.9798	12.5216	comp11143_c0	sp|Q8VDM6|HNRL1_MOUSE^Q8VDM6^Q:566-2032,H:109-608^71.6%ID^E:-210.53^RecName: Full=Heterogeneous nuclear ribonucleoprotein U-like protein 1;^Eukaryota; Metazoa; Chordata; Craniata; Vertebrata; Euteleostomi; Mammalia; Eutheria; Euarchontoglires; Glires; Rodentia; Sciurognathi; Muroidea; Muridae; Murinae; Mus; Mus	.	m.4561	470-2317[+]	sp|Q8VDM6|HNRL1_MOUSE^Q8VDM6^Q:33-608,H:109-687^68.75%ID^E:-238.02^RecName: Full=Heterogeneous nuclear ribonucleoprotein U-like protein 1;^Eukaryota; Metazoa; Chordata; Craniata; Vertebrata; Euteleostomi; Mammalia; Eutheria; Euarchontoglires; Glires; Rodentia; Sciurognathi; Muroidea; Muridae; Murinae; Mus; Mus	PF00622.23^SPRY^SPRY domain^170-300^E:3.5e-23`PF13671.1^AAA_33^AAA domain^338-482^E:4.9e-23	.	.	.	GO:0005634^cellular_component^nucleus`GO:0030529^cellular_component^ribonucleoprotein complex`GO:0003723^molecular_function^RNA binding`GO:0006355^biological_process^regulation of transcription, DNA-dependent`GO:0009615^biological_process^response to virus`GO:0006396^biological_process^RNA processing`GO:0006351^biological_process^transcription, DNA-dependent
comp11143_c0_seq1	0.816997	7.64671	0.625661	1	10.3454	12.9935	11.9798	12.5216	comp11143_c0	sp|Q8VDM6|HNRL1_MOUSE^Q8VDM6^Q:566-2032,H:109-608^71.6%ID^E:-210.53^RecName: Full=Heterogeneous nuclear ribonucleoprotein U-like protein 1;^Eukaryota; Metazoa; Chordata; Craniata; Vertebrata; Euteleostomi; Mammalia; Eutheria; Euarchontoglires; Glires; Rodentia; Sciurognathi; Muroidea; Muridae; Murinae; Mus; Mus	.	m.4563	1995-2318[+]	.	.	.	ExpAA=21.78^PredHel=1^Topology=i13-35o	.	.
comp11144_c0_seq1	0.958666	-1.31675	0.867679	1	1	4.24793	2.80735	1	comp11144_c0	sp|Q9UHN6|TMEM2_HUMAN^Q9UHN6^Q:2-244,H:245-324^58.0247%ID^E:-17.77^RecName: Full=Transmembrane protein 2;^Eukaryota; Metazoa; Chordata; Craniata; Vertebrata; Euteleostomi; Mammalia; Eutheria; Euarchontoglires; Primates; Haplorrhini; Catarrhini; Hominidae; Homo	.	.	.	.	.	.	.	NOG12793^Calcium ion binding protein	GO:0016021^cellular_component^integral to membrane`GO:0007275^biological_process^multicellular organismal development	.
comp11145_c0_seq1	0.159317	5.82908	0.915714	1	9.48583	10.7296	10.4625	10.2009	comp11145_c0	sp|O70481|UBR1_MOUSE^O70481^Q:1966-1562,H:1290-1424^47.4074%ID^E:-10000^RecName: Full=E3 ubiquitin-protein ligase UBR1;^Eukaryota; Metazoa; Chordata; Craniata; Vertebrata; Euteleostomi; Mammalia; Eutheria; Euarchontoglires; Glires; Rodentia; Sciurognathi; Muroidea; Muridae; Murinae; Mus; Mus	.	m.4564	581-5869[-]	sp|Q8IWV8|UBR2_HUMAN^Q8IWV8^Q:5-1762,H:1-1755^80.5445%ID^E:-10000^RecName: Full=E3 ubiquitin-protein ligase UBR2;^Eukaryota; Metazoa; Chordata; Craniata; Vertebrata; Euteleostomi; Mammalia; Eutheria; Euarchontoglires; Primates; Haplorrhini; Catarrhini; Hominidae; Homo	PF02207.15^zf-UBR^Putative zinc finger in N-recognin (UBR box)^107-176^E:2.1e-18`PF02617.12^ClpS^ATP-dependent Clp protease adaptor protein ClpS^231-310^E:2.5e-20	.	.	.	GO:0000785^cellular_component^chromatin`GO:0005634^cellular_component^nucleus`GO:0005886^cellular_component^plasma membrane`GO:0000151^cellular_component^ubiquitin ligase complex`GO:0070728^molecular_function^leucine binding`GO:0046872^molecular_function^metal ion binding`GO:0004842^molecular_function^ubiquitin-protein ligase activity`GO:0008270^molecular_function^zinc ion binding`GO:0071233^biol…
comp11147_c0_seq1	0.0126118	-0.862707	1	1	3.16993	3.32193	4	2.32193	comp11147_c0	.	.	.	.	.	.	.	.	.	.	.
comp11148_c0_seq1	1.11407	-1.55969	0.769762	1	0	3.16993	2	3.16993	comp11148_c0	.	.	.	.	.	.	.	.	.	.	.
comp11149_c0_seq1	-2.89101	-1.27762	0.202305	1	3.16993	3	1	3.16993	comp11149_c0	.	.	.	.	.	.	.	.	.	.	.
comp1115_c0_seq1	-8.22551	-1.14707	0.0213227	0.54117	4.75489	-Inf	-Inf	-Inf	comp1115_c0	sp|Q13541|4EBP1_HUMAN^Q13541^Q:4-252,H:33-117^71.7647%ID^E:-28.54^RecName: Full=Eukaryotic translation initiation factor 4E-binding protein 1;^Eukaryota; Metazoa; Chordata; Craniata; Vertebrata; Euteleostomi; Mammalia; Eutheria; Euarchontoglires; Primates; Haplorrhini; Catarrhini; Hominidae; Homo	.	.	.	.	.	.	.	NOG78084^Eukaryotic translation initiation factor 4E binding protein 1	GO:0005829^cellular_component^cytosol`GO:0005634^cellular_component^nucleus`GO:0043234^cellular_component^protein complex`GO:0000082^biological_process^G1/S transition of mitotic cell cycle`GO:0008286^biological_process^insulin receptor signaling pathway`GO:0031333^biological_process^negative regulation of protein complex assembly`GO:0045947^biological_process^negative regulation of translational…	.
comp11150_c0_seq1	-0.163027	-0.943065	1	1	2.80735	3.45943	3.45943	3.16993	comp11150_c0	.	.	.	.	.	.	.	.	.	.	.
comp11151_c0_seq1	0.201606	8.86925	0.916235	1	12.5541	13.8542	13.5731	13.048	comp11151_c0	sp|Q28BT4|CALU_XENTR^Q28BT4^Q:171-1115,H:1-315^86.6667%ID^E:-165.86^RecName: Full=Calumenin;^Eukaryota; Metazoa; Chordata; Craniata; Vertebrata; Euteleostomi; Amphibia; Batrachia; Anura; Pipoidea; Pipidae; Xenopodinae; Xenopus; Silurana	.	m.4567	171-1118[+]	sp|Q28BT4|CALU_XENTR^Q28BT4^Q:1-315,H:1-315^86.6667%ID^E:-166.73^RecName: Full=Calumenin;^Eukaryota; Metazoa; Chordata; Craniata; Vertebrata; Euteleostomi; Amphibia; Batrachia; Anura; Pipoidea; Pipidae; Xenopodinae; Xenopus; Silurana	PF13499.1^EF_hand_5^EF-hand domain pair^74-131^E:1.2e-09`PF13202.1^EF_hand_3^EF hand^114-132^E:0.00022`PF13833.1^EF_hand_6^EF-hand domain pair^115-132^E:0.032`PF13499.1^EF_hand_5^EF-hand domain pair^157-213^E:1.7e-07`PF13202.1^EF_hand_3^EF hand^196-213^E:0.00027`PF13833.1^EF_hand_6^EF-hand domain pair^267-291^E:0.0026	sigP:1^19^0.631^YES	.	.	GO:0005576^cellular_component^extracellular region`GO:0042470^cellular_component^melanosome`GO:0033018^cellular_component^sarcoplasmic reticulum lumen`GO:0005509^molecular_function^calcium ion binding
comp11152_c0_seq1	5.99321	-1.44996	0.155403	1	-Inf	3.58496	3.32193	2	comp11152_c0	.	.	.	.	.	.	.	.	.	.	.
comp11153_c0_seq1	0.175216	-1.91595	1	1	1	2.58496	2	2	comp11153_c0	.	.	.	.	.	.	.	.	.	.	.
comp11154_c0_seq1	-0.226806	-1.05229	1	1	2	3.90689	2.58496	3.45943	comp11154_c0	sp|O14513|NCKP5_HUMAN^O14513^Q:5-214,H:244-313^64.2857%ID^E:-22.4367^RecName: Full=Nck-associated protein 5;^Eukaryota; Metazoa; Chordata; Craniata; Vertebrata; Euteleostomi; Mammalia; Eutheria; Euarchontoglires; Primates; Haplorrhini; Catarrhini; Hominidae; Homo	.	m.4568	2-394[+]	sp|O14513|NCKP5_HUMAN^O14513^Q:2-71,H:244-313^64.2857%ID^E:-27.5848^RecName: Full=Nck-associated protein 5;^Eukaryota; Metazoa; Chordata; Craniata; Vertebrata; Euteleostomi; Mammalia; Eutheria; Euarchontoglires; Primates; Haplorrhini; Catarrhini; Hominidae; Homo	.	.	.	NOG85857^Nck-Associated protein 5	.
comp11155_c0_seq1	0.175216	-1.77933	1	1	1	2	2	3	comp11155_c0	.	.	.	.	.	.	.	.	.	.	.
comp11156_c0_seq1	-1.05667	-1.50485	0.724598	1	2.58496	3.58496	2.32193	0	comp11156_c0	.	.	.	.	.	.	.	.	.	.	.
comp11157_c0_seq1	-6.77558	0.284666	0.0163094	0.49984	6.16993	-Inf	0	-Inf	comp11157_c0	sp|P51893|SAHHA_XENLA^P51893^Q:746-3,H:69-316^89.9194%ID^E:-128.75^RecName: Full=Adenosylhomocysteinase A;^Eukaryota; Metazoa; Chordata; Craniata; Vertebrata; Euteleostomi; Amphibia; Batrachia; Anura; Pipoidea; Pipidae; Xenopodinae; Xenopus; Xenopus	.	m.4569	3-746[-]	sp|P51893|SAHHA_XENLA^P51893^Q:1-248,H:69-316^89.9194%ID^E:-128.76^RecName: Full=Adenosylhomocysteinase A;^Eukaryota; Metazoa; Chordata; Craniata; Vertebrata; Euteleostomi; Amphibia; Batrachia; Anura; Pipoidea; Pipidae; Xenopodinae; Xenopus; Xenopus	PF05221.12^AdoHcyase^S-adenosyl-L-homocysteine hydrolase^1-159^E:9.3e-65`PF00670.16^AdoHcyase_NAD^S-adenosyl-L-homocysteine hydrolase, NAD binding domain^124-247^E:2.8e-67`PF02826.14^2-Hacid_dh_C^D-isomer specific 2-hydroxyacid dehydrogenase, NAD binding domain^142-233^E:2.5e-08`PF07991.7^IlvN^Acetohydroxy acid isomeroreductase, catalytic domain^144-206^E:8.6e-05	.	.	.	GO:0004013^molecular_function^adenosylhomocysteinase activity`GO:0006730^biological_process^one-carbon metabolic process
comp11158_c0_seq1	-1.76421	-1.31046	0.469723	1	2.58496	3.32193	1.58496	3.16993	comp11158_c0	sp|Q8H5X5|SCAM1_ORYSJ^Q8H5X5^Q:236-102,H:179-228^32%ID^E:-0.02^RecName: Full=Secretory carrier-associated membrane protein 1;^Eukaryota; Viridiplantae; Streptophyta; Embryophyta; Tracheophyta; Spermatophyta; Magnoliophyta; Liliopsida; Poales; Poaceae; BEP clade; Ehrhartoideae; Oryzeae; Oryza	.	.	.	.	.	.	.	.	GO:0005769^cellular_component^early endosome`GO:0016021^cellular_component^integral to membrane`GO:0005886^cellular_component^plasma membrane`GO:0030658^cellular_component^transport vesicle membrane`GO:0015031^biological_process^protein transport`GO:0006898^biological_process^receptor-mediated endocytosis	.
comp11159_c0_seq1	-0.228632	-1.55009	1	1	2.58496	2.32193	3.16993	1	comp11159_c0	sp|A1YG88|ZNF16_PANPA^A1YG88^Q:153-1,H:591-641^60.7843%ID^E:-15.2441^RecName: Full=Zinc finger protein 16;^Eukaryota; Metazoa; Chordata; Craniata; Vertebrata; Euteleostomi; Mammalia; Eutheria; Euarchontoglires; Primates; Haplorrhini; Catarrhini; Hominidae; Pan	.	.	.	.	.	.	.	.	GO:0005634^cellular_component^nucleus`GO:0003677^molecular_function^DNA binding`GO:0046872^molecular_function^metal ion binding`GO:0008270^molecular_function^zinc ion binding`GO:0006355^biological_process^regulation of transcription, DNA-dependent`GO:0006351^biological_process^transcription, DNA-dependent	.
comp11160_c0_seq1	5.27127	-1.28757	0.264084	1	-Inf	4.24793	2.58496	2.58496	comp11160_c0	.	.	.	.	.	.	.	.	.	.	.
comp11162_c0_seq1	5.84372	-1.06407	0.179548	1	-Inf	4.85798	3.16993	0	comp11162_c0	.	.	.	.	.	.	.	.	.	.	.
comp11163_c0_seq1	-1.27605	8.50142	0.492408	1	13.3337	12.4263	12.875	11.163	comp11163_c0	.	.	m.4570	2885-3388[-]	sp|Q8RYK0|CML31_ORYSJ^Q8RYK0^Q:70-83,H:86-104^57.8947%ID^E:-0.129111^RecName: Full=Probable calcium-binding protein CML31;^Eukaryota; Viridiplantae; Streptophyta; Embryophyta; Tracheophyta; Spermatophyta; Magnoliophyta; Liliopsida; Poales; Poaceae; BEP clade; Ehrhartoideae; Oryzeae; Oryza	.	.	.	COG5126^Ca2+-binding protein (EF-Hand superfamily)	GO:0005509^molecular_function^calcium ion binding
comp11165_c0_seq1	5.99321	-1.65364	0.157193	1	-Inf	2.80735	3.32193	2	comp11165_c0	.	.	.	.	.	.	.	.	.	.	.
comp11166_c0_seq1	2.08614	-1.54608	0.428431	1	0	2.80735	3	2.80735	comp11166_c0	.	.	.	.	.	.	.	.	.	.	.
comp11169_c0_seq1	0.717353	-1.13664	1	1	0	4.32193	1.58496	3.45943	comp11169_c0	.	.	m.4571	3-350[+]	.	.	.	.	.	.
comp1117_c0_seq1	1.42489	-1.78516	0.618139	1	0	3.45943	2.32193	1	comp1117_c0	.	.	.	.	.	.	.	.	.	.	.
comp11171_c0_seq1	-0.0670329	0.495947	1	1	4.45943	5.83289	5.20945	2.32193	comp11171_c0	.	.	.	.	.	.	.	.	.	.	.
comp11172_c0_seq1	-1.29701	9.33809	0.527406	1	13.3845	14.8193	12.9048	13.5078	comp11172_c0	sp|P63274|RS17_CRIGR^P63274^Q:834-430,H:1-135^95.5556%ID^E:-68.06^RecName: Full=40S ribosomal protein S17;^Eukaryota; Metazoa; Chordata; Craniata; Vertebrata; Euteleostomi; Mammalia; Eutheria; Euarchontoglires; Glires; Rodentia; Sciurognathi; Muroidea; Cricetidae; Cricetinae; Cricetulus	.	m.4572	427-939[-]	sp|P63273|RS17_CANFA^P63273^Q:36-170,H:1-135^95.5556%ID^E:-68.55^RecName: Full=40S ribosomal protein S17;^Eukaryota; Metazoa; Chordata; Craniata; Vertebrata; Euteleostomi; Mammalia; Eutheria; Laurasiatheria; Carnivora; Caniformia; Canidae; Canis	PF00833.13^Ribosomal_S17e^Ribosomal S17^36-156^E:1.3e-62	.	ExpAA=17.92^PredHel=1^Topology=o15-37i	COG1383^Ribosomal protein S17E	GO:0022627^cellular_component^cytosolic small ribosomal subunit`GO:0003735^molecular_function^structural constituent of ribosome`GO:0000028^biological_process^ribosomal small subunit assembly`GO:0006414^biological_process^translational elongation
comp11173_c0_seq1	-1.79033	-0.341506	0.387634	1	3.58496	3.32193	2.58496	4.9542	comp11173_c0	.	.	.	.	.	.	.	.	.	.	.
comp11174_c0_seq1	-1.98353	-1.27026	0.418777	1	2.80735	3.45943	1.58496	3	comp11174_c0	.	.	.	.	.	.	.	.	.	.	.
comp11175_c0_seq1	-0.111245	8.23804	0.950173	1	12.1938	13.0969	12.8999	12.2252	comp11175_c0	sp|P25815|S100P_HUMAN^P25815^Q:183-455,H:1-91^54.9451%ID^E:-23.06^RecName: Full=Protein S100-P;^Eukaryota; Metazoa; Chordata; Craniata; Vertebrata; Euteleostomi; Mammalia; Eutheria; Euarchontoglires; Primates; Haplorrhini; Catarrhini; Hominidae; Homo	.	.	.	.	.	.	.	NOG78209^S100 calcium binding protein P	GO:0005737^cellular_component^cytoplasm`GO:0005634^cellular_component^nucleus`GO:0005509^molecular_function^calcium ion binding`GO:0000287^molecular_function^magnesium ion binding`GO:0043542^biological_process^endothelial cell migration`GO:0010033^biological_process^response to organic substance	.
comp11177_c0_seq1	2.66167	-0.997439	0.278462	1	0	3.16993	3.58496	3.90689	comp11177_c0	.	.	.	.	.	.	.	.	.	.	.
comp11178_c0_seq1	-1.26011	-1.06729	0.562707	1	3.45943	1	3	3.45943	comp11178_c0	.	.	.	.	.	.	.	.	.	.	.
comp11179_c0_seq1	-3.93877	-1.42541	0.185426	1	3.32193	2.32193	0	3	comp11179_c0	.	.	.	.	.	.	.	.	.	.	.
comp1118_c0_seq1	-0.388775	-2.08419	1	1	1.58496	1.58496	2	1.58496	comp1118_c0	.	.	.	.	.	.	.	.	.	.	.
comp11180_c0_seq1	-1.73893	-1.51786	0.507734	1	2	2.58496	1	3.45943	comp11180_c0	.	.	.	.	.	.	.	.	.	.	.
comp11183_c0_seq1	-0.79321	-1.84218	0.869375	1	2	2.58496	2	1.58496	comp11183_c0	.	.	.	.	.	.	.	.	.	.	.
comp11184_c0_seq1	-5.19424	-0.88106	0.0579722	0.845808	4.58496	3.58496	0	-Inf	comp11184_c0	sp|Q68F99|STAC3_XENTR^Q68F99^Q:207-308,H:1-34^61.7647%ID^E:-4.2^RecName: Full=SH3 and cysteine-rich domain-containing protein 3;^Eukaryota; Metazoa; Chordata; Craniata; Vertebrata; Euteleostomi; Amphibia; Batrachia; Anura; Pipoidea; Pipidae; Xenopodinae; Xenopus; Silurana	.	.	.	.	.	.	.	NOG81499^SH3 and cysteine rich domain 3 protein	GO:0005622^cellular_component^intracellular`GO:0046872^molecular_function^metal ion binding`GO:0035556^biological_process^intracellular signal transduction	.
comp11185_c0_seq1	2.25293	-1.66052	0.369228	1	0	1	3.16993	3	comp11185_c0	.	.	.	.	.	.	.	.	.	.	.
comp11187_c0_seq1	2.25293	-1.77952	0.370743	1	0	1.58496	3.16993	2.32193	comp11187_c0	.	.	.	.	.	.	.	.	.	.	.
comp11189_c0_seq1	-0.0779528	-0.995123	1	1	1.58496	4.39232	2.32193	3.32193	comp11189_c0	sp|Q9Y606|TRUA_HUMAN^Q9Y606^Q:339-19,H:296-401^48.5981%ID^E:-21.24^RecName: Full=tRNA pseudouridine synthase A, mitochondrial;^Eukaryota; Metazoa; Chordata; Craniata; Vertebrata; Euteleostomi; Mammalia; Eutheria; Euarchontoglires; Primates; Haplorrhini; Catarrhini; Hominidae; Homo	.	m.4575	13-339[-]	sp|Q9Y606|TRUA_HUMAN^Q9Y606^Q:1-107,H:296-401^48.5981%ID^E:-21.24^RecName: Full=tRNA pseudouridine synthase A, mitochondrial;^Eukaryota; Metazoa; Chordata; Craniata; Vertebrata; Euteleostomi; Mammalia; Eutheria; Euarchontoglires; Primates; Haplorrhini; Catarrhini; Hominidae; Homo	.	.	.	COG0101^Pseudouridylate synthase	GO:0005739^cellular_component^mitochondrion`GO:0005730^cellular_component^nucleolus`GO:0005634^cellular_component^nucleus`GO:0005667^cellular_component^transcription factor complex`GO:0003677^molecular_function^DNA binding`GO:0030374^molecular_function^ligand-dependent nuclear receptor transcription coactivator activity`GO:0009982^molecular_function^pseudouridine synthase activity`GO:0004730^mole…
comp1119_c0_seq1	1.42489	-2.07024	0.620834	1	0	3	2.32193	-Inf	comp1119_c0	.	.	.	.	.	.	.	.	.	.	.
comp11190_c0_seq1	0.750086	-1.34493	0.800147	1	1.58496	3.58496	3.16993	2	comp11190_c0	.	.	.	.	.	.	.	.	.	.	.
comp11190_c0_seq2	1.42489	-1.51951	0.615972	1	0	3.32193	2.32193	3	comp11190_c0	.	.	.	.	.	.	.	.	.	.	.
comp11191_c0_seq1	0.228693	0.617067	0.946763	1	3.90689	5.78136	4.9542	5	comp11191_c0	.	.	m.4576	1001-1324[+]	.	.	.	ExpAA=35.84^PredHel=2^Topology=i13-35o55-77i	.	.
comp11193_c0_seq1	-3.16578	-1.03257	0.162408	1	4	3.58496	1.58496	1.58496	comp11193_c0	sp|Q9HCK4|ROBO2_HUMAN^Q9HCK4^Q:95-361,H:505-602^27.551%ID^E:-1.64^RecName: Full=Roundabout homolog 2;^Eukaryota; Metazoa; Chordata; Craniata; Vertebrata; Euteleostomi; Mammalia; Eutheria; Euarchontoglires; Primates; Haplorrhini; Catarrhini; Hominidae; Homo	.	m.4577	2-427[+]	sp|Q9HCK4|ROBO2_HUMAN^Q9HCK4^Q:32-120,H:505-602^27.551%ID^E:-1.64^RecName: Full=Roundabout homolog 2;^Eukaryota; Metazoa; Chordata; Craniata; Vertebrata; Euteleostomi; Mammalia; Eutheria; Euarchontoglires; Primates; Haplorrhini; Catarrhini; Hominidae; Homo	PF00041.16^fn3^Fibronectin type III domain^54-123^E:9.5e-09	.	.	.	GO:0030673^cellular_component^axolemma`GO:0009986^cellular_component^cell surface`GO:0016021^cellular_component^integral to membrane`GO:0008046^molecular_function^axon guidance receptor activity`GO:0042802^molecular_function^identical protein binding`GO:0061364^biological_process^apoptotic process involved in luteolysis`GO:0016199^biological_process^axon midline choice point recognition`GO:003287…
comp11194_c0_seq1	-1.58682	-0.966217	0.543541	1	2.80735	4.32193	2	3	comp11194_c0	sp|Q06807|TIE2_BOVIN^Q06807^Q:13-336,H:681-788^62.037%ID^E:-29.71^RecName: Full=Angiopoietin-1 receptor;^Eukaryota; Metazoa; Chordata; Craniata; Vertebrata; Euteleostomi; Mammalia; Eutheria; Laurasiatheria; Cetartiodactyla; Ruminantia; Pecora; Bovidae; Bovinae; Bos	.	m.4578	1-348[+]	sp|Q06807|TIE2_BOVIN^Q06807^Q:5-112,H:681-788^62.037%ID^E:-29.71^RecName: Full=Angiopoietin-1 receptor;^Eukaryota; Metazoa; Chordata; Craniata; Vertebrata; Euteleostomi; Mammalia; Eutheria; Laurasiatheria; Cetartiodactyla; Ruminantia; Pecora; Bovidae; Bovinae; Bos	PF00041.16^fn3^Fibronectin type III domain^6-44^E:1.1e-05	.	ExpAA=23.02^PredHel=1^Topology=o73-95i	COG0515^Serine/threonine protein kinase	GO:0005884^cellular_component^actin filament`GO:0016324^cellular_component^apical plasma membrane`GO:0009925^cellular_component^basal plasma membrane`GO:0009986^cellular_component^cell surface`GO:0005911^cellular_component^cell-cell junction`GO:0005737^cellular_component^cytoplasm`GO:0005576^cellular_component^extracellular region`GO:0005925^cellular_component^focal adhesion`GO:0005887^cellular_c…
comp11195_c0_seq1	1.10963	-0.392787	0.628468	1	2.58496	4.08746	4.52356	3.80735	comp11195_c0	sp|Q08DG4|FBXL8_BOVIN^Q08DG4^Q:295-26,H:137-226^48.8889%ID^E:-15.59^RecName: Full=F-box/LRR-repeat protein 8;^Eukaryota; Metazoa; Chordata; Craniata; Vertebrata; Euteleostomi; Mammalia; Eutheria; Laurasiatheria; Cetartiodactyla; Ruminantia; Pecora; Bovidae; Bovinae; Bos	.	m.4579	2-556[-]	sp|Q08DG4|FBXL8_BOVIN^Q08DG4^Q:88-177,H:137-226^48.8889%ID^E:-15.59^RecName: Full=F-box/LRR-repeat protein 8;^Eukaryota; Metazoa; Chordata; Craniata; Vertebrata; Euteleostomi; Mammalia; Eutheria; Laurasiatheria; Cetartiodactyla; Ruminantia; Pecora; Bovidae; Bovinae; Bos	.	.	.	NOG47346^F-Box and leucine-rich repeat protein 8	.
comp11197_c0_seq1	0.179609	-0.616858	1	1	2.32193	4.75489	3.32193	3.45943	comp11197_c0	.	.	.	.	.	.	.	.	.	.	.
comp1120_c0_seq1	-5.00237	-1.29535	0.0704917	0.918747	4.39232	1.58496	0	-Inf	comp1120_c0	sp|A2ASS6|TITIN_MOUSE^A2ASS6^Q:3-305,H:44-144^78.2178%ID^E:-44.32^RecName: Full=Titin;^Eukaryota; Metazoa; Chordata; Craniata; Vertebrata; Euteleostomi; Mammalia; Eutheria; Euarchontoglires; Glires; Rodentia; Sciurognathi; Muroidea; Muridae; Murinae; Mus; Mus	.	m.76	3-308[+]	sp|A2ASS6|TITIN_MOUSE^A2ASS6^Q:1-101,H:44-144^78.2178%ID^E:-44.32^RecName: Full=Titin;^Eukaryota; Metazoa; Chordata; Craniata; Vertebrata; Euteleostomi; Mammalia; Eutheria; Euarchontoglires; Glires; Rodentia; Sciurognathi; Muroidea; Muridae; Murinae; Mus; Mus	PF07679.11^I-set^Immunoglobulin I-set domain^28-100^E:8e-14`PF13895.1^Ig_2^Immunoglobulin domain^35-98^E:1.1e-05	.	.	COG0515^Serine/threonine protein kinase	GO:0000794^cellular_component^condensed nuclear chromosome`GO:0031430^cellular_component^M band`GO:0005859^cellular_component^muscle myosin complex`GO:0005865^cellular_component^striated muscle thin filament`GO:0030018^cellular_component^Z disc`GO:0005524^molecular_function^ATP binding`GO:0005509^molecular_function^calcium ion binding`GO:0003676^molecular_function^nucleic acid binding`GO:0004674^…
comp11201_c0_seq1	-3.21041	-1.49563	0.319989	1	2.58496	3.45943	0	2.58496	comp11201_c0	sp|F6RIX4|MCM9_XENTR^F6RIX4^Q:247-2,H:204-285^84.1463%ID^E:-33.19^RecName: Full=DNA helicase MCM9;^Eukaryota; Metazoa; Chordata; Craniata; Vertebrata; Euteleostomi; Amphibia; Batrachia; Anura; Pipoidea; Pipidae; Xenopodinae; Xenopus; Silurana	.	.	.	.	.	.	.	.	GO:0097362^cellular_component^MCM8-MCM9 complex`GO:0005634^cellular_component^nucleus`GO:0005524^molecular_function^ATP binding`GO:0003677^molecular_function^DNA binding`GO:0004386^molecular_function^helicase activity`GO:0006260^biological_process^DNA replication`GO:0000724^biological_process^double-strand break repair via homologous recombination	.
comp11202_c0_seq1	0.0562995	-0.725737	1	1	2.58496	4.24793	3.45943	3.45943	comp11202_c0	.	.	.	.	.	.	.	.	.	.	.
comp11203_c0_seq1	-0.395421	-0.883998	0.918864	1	2.58496	4.39232	3	2.80735	comp11203_c0	.	.	.	.	.	.	.	.	.	.	.
comp11205_c0_seq1	-4.52965	-2.04489	0.449166	1	1	2.58496	-Inf	2.58496	comp11205_c0	.	.	.	.	.	.	.	.	.	.	.
comp11206_c0_seq1	0.17763	-1.47775	1	1	1.58496	2.58496	2.58496	3.16993	comp11206_c0	.	.	.	.	.	.	.	.	.	.	.
comp11207_c0_seq1	1.11407	-1.99448	0.772056	1	0	2.80735	2	1.58496	comp11207_c0	.	.	.	.	.	.	.	.	.	.	.
comp11210_c0_seq1	1.16469	-0.700721	0.599145	1	2	4.45943	4	2.80735	comp11210_c0	.	.	m.4580	2-574[+]	.	.	.	.	.	.
comp11211_c0_seq1	1.37852	-1.255	0.553544	1	1.58496	2.32193	3.80735	2.80735	comp11211_c0	.	.	.	.	.	.	.	.	.	.	.
comp11212_c0_seq1	0.294132	-0.371695	0.935989	1	2.58496	4.45943	3.70044	4.39232	comp11212_c0	sp|Q5U239|TM145_XENLA^Q5U239^Q:137-661,H:263-437^93.7143%ID^E:-102.645^RecName: Full=Transmembrane protein 145;^Eukaryota; Metazoa; Chordata; Craniata; Vertebrata; Euteleostomi; Amphibia; Batrachia; Anura; Pipoidea; Pipidae; Xenopodinae; Xenopus; Xenopus	.	m.4581	2-664[+]	sp|Q5U239|TM145_XENLA^Q5U239^Q:1-220,H:218-437^90.9091%ID^E:-115.63^RecName: Full=Transmembrane protein 145;^Eukaryota; Metazoa; Chordata; Craniata; Vertebrata; Euteleostomi; Amphibia; Batrachia; Anura; Pipoidea; Pipidae; Xenopodinae; Xenopus; Xenopus	PF10192.4^GpcrRhopsn4^Rhodopsin-like GPCR transmembrane domain^3-187^E:1.3e-55	.	ExpAA=119.63^PredHel=6^Topology=i2-20o35-57i70-92o107-126i139-161o171-190i	.	GO:0016021^cellular_component^integral to membrane
comp11213_c0_seq1	0.495139	-1.41197	0.828037	1	2	2	3.32193	2.80735	comp11213_c0	.	.	.	.	.	.	.	.	.	.	.
comp11215_c0_seq1	1.04595	-0.294786	0.629522	1	2.58496	3.90689	4.45943	4.39232	comp11215_c0	.	.	.	.	.	.	.	.	.	.	.
comp11217_c0_seq1	2.40242	-1.21389	0.317458	1	0	3.16993	3.32193	3.45943	comp11217_c0	.	.	.	.	.	.	.	.	.	.	.
comp11218_c0_seq1	-1.276	-1.1429	0.657423	1	2.80735	3.90689	2.32193	2.58496	comp11218_c0	.	.	.	.	.	.	.	.	.	.	.
comp11219_c0_seq1	-0.228632	-1.15702	1	1	2.58496	4	3.16993	1	comp11219_c0	.	.	.	.	.	.	.	.	.	.	.
comp11220_c0_seq1	-3.59079	-1.31419	1	1	0	4.58496	-Inf	2.58496	comp11220_c0	sp|Q96DR4|STAR4_HUMAN^Q96DR4^Q:94-2,H:4-34^51.6129%ID^E:-2.22^RecName: Full=StAR-related lipid transfer protein 4;^Eukaryota; Metazoa; Chordata; Craniata; Vertebrata; Euteleostomi; Mammalia; Eutheria; Euarchontoglires; Primates; Haplorrhini; Catarrhini; Hominidae; Homo	.	.	.	.	.	.	.	.	GO:0008289^molecular_function^lipid binding`GO:0006869^biological_process^lipid transport	.
comp11221_c0_seq1	-9.82494	0.470914	0.00630818	0.413659	6.35755	-Inf	-Inf	-Inf	comp11221_c0	sp|A6NK02|TRI75_HUMAN^A6NK02^Q:242-325,H:293-320^60.7143%ID^E:-1.06^RecName: Full=Tripartite motif-containing protein 75;^Eukaryota; Metazoa; Chordata; Craniata; Vertebrata; Euteleostomi; Mammalia; Eutheria; Euarchontoglires; Primates; Haplorrhini; Catarrhini; Hominidae; Homo	.	m.4583	2-328[+]	sp|Q58DK8|TRI38_BOVIN^Q58DK8^Q:81-106,H:287-312^69.2308%ID^E:-1.06^RecName: Full=Tripartite motif-containing protein 38;^Eukaryota; Metazoa; Chordata; Craniata; Vertebrata; Euteleostomi; Mammalia; Eutheria; Laurasiatheria; Cetartiodactyla; Ruminantia; Pecora; Bovidae; Bovinae; Bos	PF13765.1^PRY^SPRY-associated domain^84-107^E:4.4e-07	.	.	.	GO:0005622^cellular_component^intracellular`GO:0046872^molecular_function^metal ion binding`GO:0004871^molecular_function^signal transducer activity`GO:0008270^molecular_function^zinc ion binding`GO:0043123^biological_process^positive regulation of I-kappaB kinase/NF-kappaB cascade
comp11223_c0_seq1	0.583298	-0.568826	0.89062	1	1.58496	5.2854	3	3	comp11223_c0	sp|Q5U2N3|PITM1_RAT^Q5U2N3^Q:188-6,H:516-576^75.4098%ID^E:-53.9687^RecName: Full=Membrane-associated phosphatidylinositol transfer protein 1;^Eukaryota; Metazoa; Chordata; Craniata; Vertebrata; Euteleostomi; Mammalia; Eutheria; Euarchontoglires; Glires; Rodentia; Sciurognathi; Muroidea; Muridae; Murinae; Rattus	.	m.4584	3-539[-]	sp|O35954|PITM1_MOUSE^O35954^Q:28-178,H:426-576^79.4702%ID^E:-62.47^RecName: Full=Membrane-associated phosphatidylinositol transfer protein 1;^Eukaryota; Metazoa; Chordata; Craniata; Vertebrata; Euteleostomi; Mammalia; Eutheria; Euarchontoglires; Glires; Rodentia; Sciurognathi; Muroidea; Muridae; Murinae; Mus; Mus	.	.	.	COG5083^Uncharacterized protein involved in plasmid maintenance	GO:0032154^cellular_component^cleavage furrow`GO:0005789^cellular_component^endoplasmic reticulum membrane`GO:0032580^cellular_component^Golgi cisterna membrane`GO:0005811^cellular_component^lipid particle`GO:0030496^cellular_component^midbody`GO:0046872^molecular_function^metal ion binding`GO:0005543^molecular_function^phospholipid binding`GO:0015031^biological_process^protein transport
comp11224_c0_seq1	0.630582	-0.870899	0.826846	1	2	4.08746	3.45943	3.32193	comp11224_c0	.	.	.	.	.	.	.	.	.	.	.
comp11225_c0_seq1	1.31408	-0.730451	0.674394	1	1	4.39232	3.16993	4	comp11225_c0	sp|O75417|DPOLQ_HUMAN^O75417^Q:2-403,H:98-231^81.3433%ID^E:-56.85^RecName: Full=DNA polymerase theta;^Eukaryota; Metazoa; Chordata; Craniata; Vertebrata; Euteleostomi; Mammalia; Eutheria; Euarchontoglires; Primates; Haplorrhini; Catarrhini; Hominidae; Homo	.	m.4585	2-406[+]	sp|O75417|DPOLQ_HUMAN^O75417^Q:1-134,H:98-231^81.3433%ID^E:-56.85^RecName: Full=DNA polymerase theta;^Eukaryota; Metazoa; Chordata; Craniata; Vertebrata; Euteleostomi; Mammalia; Eutheria; Euarchontoglires; Primates; Haplorrhini; Catarrhini; Hominidae; Homo	PF00270.24^DEAD^DEAD/DEAH box helicase^7-126^E:1e-16	.	.	COG1204^Superfamily II helicase	GO:0005654^cellular_component^nucleoplasm`GO:0005524^molecular_function^ATP binding`GO:0008026^molecular_function^ATP-dependent helicase activity`GO:0003684^molecular_function^damaged DNA binding`GO:0003887^molecular_function^DNA-directed DNA polymerase activity`GO:0043142^molecular_function^single-stranded DNA-dependent ATPase activity`GO:0006281^biological_process^DNA repair`GO:0006260^biologic…
comp11226_c0_seq1	0	-1.8518	1	1	-Inf	4.24793	-Inf	-Inf	comp11226_c0	.	.	.	.	.	.	.	.	.	.	.
comp11227_c0_seq1	-0.925923	7.19345	0.564021	1	11.0519	13.0133	10.9432	10.8819	comp11227_c0	sp|P23588|IF4B_HUMAN^P23588^Q:3566-3126,H:31-177^87.0748%ID^E:-161.112^RecName: Full=Eukaryotic translation initiation factor 4B;^Eukaryota; Metazoa; Chordata; Craniata; Vertebrata; Euteleostomi; Mammalia; Eutheria; Euarchontoglires; Primates; Haplorrhini; Catarrhini; Hominidae; Homo	.	m.4586	1839-3719[-]	sp|P23588|IF4B_HUMAN^P23588^Q:48-622,H:27-604^66.2207%ID^E:-207.62^RecName: Full=Eukaryotic translation initiation factor 4B;^Eukaryota; Metazoa; Chordata; Craniata; Vertebrata; Euteleostomi; Mammalia; Eutheria; Euarchontoglires; Primates; Haplorrhini; Catarrhini; Hominidae; Homo	PF00076.17^RRM_1^RNA recognition motif. (a.k.a. RRM, RBD, or RNP domain)^120-188^E:1.6e-09`PF14259.1^RRM_6^RNA recognition motif (a.k.a. RRM, RBD, or RNP domain)^120-188^E:4.8e-09	.	.	.	GO:0005829^cellular_component^cytosol`GO:0016281^cellular_component^eukaryotic translation initiation factor 4F complex`GO:0000166^molecular_function^nucleotide binding`GO:0003743^molecular_function^translation initiation factor activity`GO:0008286^biological_process^insulin receptor signaling pathway`GO:0000289^biological_process^nuclear-transcribed mRNA poly(A) tail shortening`GO:0006446^biolog…
comp11227_c0_seq2	-0.69701	7.07245	0.659724	1	11.2917	10.8154	11.412	11.6978	comp11227_c0	sp|P23588|IF4B_HUMAN^P23588^Q:2761-2705,H:269-288^65%ID^E:-150.335^RecName: Full=Eukaryotic translation initiation factor 4B;^Eukaryota; Metazoa; Chordata; Craniata; Vertebrata; Euteleostomi; Mammalia; Eutheria; Euarchontoglires; Primates; Haplorrhini; Catarrhini; Hominidae; Homo	.	m.4589	1943-3622[-]	sp|P23588|IF4B_HUMAN^P23588^Q:48-534,H:27-508^72.3108%ID^E:-192.38^RecName: Full=Eukaryotic translation initiation factor 4B;^Eukaryota; Metazoa; Chordata; Craniata; Vertebrata; Euteleostomi; Mammalia; Eutheria; Euarchontoglires; Primates; Haplorrhini; Catarrhini; Hominidae; Homo	PF00076.17^RRM_1^RNA recognition motif. (a.k.a. RRM, RBD, or RNP domain)^120-188^E:1.3e-09`PF14259.1^RRM_6^RNA recognition motif (a.k.a. RRM, RBD, or RNP domain)^120-188^E:4.1e-09	.	.	.	GO:0005829^cellular_component^cytosol`GO:0016281^cellular_component^eukaryotic translation initiation factor 4F complex`GO:0000166^molecular_function^nucleotide binding`GO:0003743^molecular_function^translation initiation factor activity`GO:0008286^biological_process^insulin receptor signaling pathway`GO:0000289^biological_process^nuclear-transcribed mRNA poly(A) tail shortening`GO:0006446^biolog…
comp11228_c0_seq1	1.11407	-1.37572	0.769003	1	0	3.16993	2	3.70044	comp11228_c0	.	.	.	.	.	.	.	.	.	.	.
comp11229_c0_seq1	-1.63447	-1.40991	0.512619	1	3.16993	3	2.32193	1.58496	comp11229_c0	.	.	.	.	.	.	.	.	.	.	.
comp1123_c0_seq1	-4.85863	-1.4411	0.0826527	1	4.24793	1	0	-Inf	comp1123_c0	.	.	.	.	.	.	.	.	.	.	.
comp11232_c0_seq1	0.74162	-1.44322	0.868011	1	1	4.24793	2.58496	-Inf	comp11232_c0	.	.	.	.	.	.	.	.	.	.	.
comp11233_c0_seq1	-0.0791436	-0.928689	1	1	2.58496	3	3.32193	3.80735	comp11233_c0	.	.	.	.	.	.	.	.	.	.	.
comp11234_c0_seq1	4.30815	-1.82964	0.631345	1	-Inf	4	1.58496	-Inf	comp11234_c0	.	.	.	.	.	.	.	.	.	.	.
comp11236_c0_seq1	-0.328567	-0.328782	0.951168	1	3.32193	4.90689	3.80735	3.45943	comp11236_c0	.	.	m.4592	1-552[-]	.	PF00077.15^RVP^Retroviral aspartyl protease^85-115^E:4.2e-05	.	.	.	.
comp11236_c0_seq2	-1.02042	-1.33365	0.658457	1	2.80735	3	2.58496	2.58496	comp11236_c0	sp|P04323|POL3_DROME^P04323^Q:294-193,H:14-46^47.0588%ID^E:-0.02^RecName: Full=Retrovirus-related Pol polyprotein from transposon 17.6;^Eukaryota; Metazoa; Ecdysozoa; Arthropoda; Hexapoda; Insecta; Pterygota; Neoptera; Endopterygota; Diptera; Brachycera; Muscomorpha; Ephydroidea; Drosophilidae; Drosophila; Sophophora	.	m.4593	1-303[-]	sp|P04323|POL3_DROME^P04323^Q:4-37,H:14-46^47.0588%ID^E:-0.02^RecName: Full=Retrovirus-related Pol polyprotein from transposon 17.6;^Eukaryota; Metazoa; Ecdysozoa; Arthropoda; Hexapoda; Insecta; Pterygota; Neoptera; Endopterygota; Diptera; Brachycera; Muscomorpha; Ephydroidea; Drosophilidae; Drosophila; Sophophora	PF00077.15^RVP^Retroviral aspartyl protease^4-33^E:5.8e-05	.	.	.	GO:0004190^molecular_function^aspartic-type endopeptidase activity`GO:0004519^molecular_function^endonuclease activity`GO:0003723^molecular_function^RNA binding`GO:0003964^molecular_function^RNA-directed DNA polymerase activity`GO:0015074^biological_process^DNA integration`GO:0090305^biological_process^nucleic acid phosphodiester bond hydrolysis`GO:0006508^biological_process^proteolysis`GO:000627…
comp11238_c0_seq1	0.175216	-1.75482	1	1	1	3	2	2.32193	comp11238_c0	.	.	.	.	.	.	.	.	.	.	.
comp11240_c0_seq1	-1.57328	-0.548462	0.460288	1	3.58496	4.70044	2.80735	3.16993	comp11240_c0	.	.	.	.	.	.	.	.	.	.	.
comp11241_c0_seq1	0.762276	0.149309	0.710044	1	3.32193	5.12928	4.90689	4.16993	comp11241_c0	sp|Q8WVS4|WDR60_HUMAN^Q8WVS4^Q:2-688,H:623-853^58.4416%ID^E:-107.739^RecName: Full=WD repeat-containing protein 60;^Eukaryota; Metazoa; Chordata; Craniata; Vertebrata; Euteleostomi; Mammalia; Eutheria; Euarchontoglires; Primates; Haplorrhini; Catarrhini; Hominidae; Homo	.	m.4594	2-994[+]	sp|Q8WVS4|WDR60_HUMAN^Q8WVS4^Q:238-329,H:862-953^65.2174%ID^E:-107.739^RecName: Full=WD repeat-containing protein 60;^Eukaryota; Metazoa; Chordata; Craniata; Vertebrata; Euteleostomi; Mammalia; Eutheria; Euarchontoglires; Primates; Haplorrhini; Catarrhini; Hominidae; Homo	PF00400.27^WD40^WD domain, G-beta repeat^75-103^E:0.0012`PF00400.27^WD40^WD domain, G-beta repeat^287-312^E:0.0037	.	.	.	.
comp11242_c0_seq1	1.25132	-0.781952	0.557951	1	2	3.58496	4.08746	3.45943	comp11242_c0	.	.	.	.	.	.	.	.	.	.	.
comp11243_c0_seq1	0.926194	11.9833	0.731524	1	14.3257	16.6934	16.0693	17.4243	comp11243_c0	sp|A8Z5Z5|SECA_SULMW^A8Z5Z5^Q:8108-7974,H:192-236^40%ID^E:-13.7703^RecName: Full=Protein translocase subunit SecA;^Bacteria; Bacteroidetes; Flavobacteriia; Flavobacteriales; Candidatus Sulcia	.	m.4595	2586-9773[-]	sp|A8Z5Z5|SECA_SULMW^A8Z5Z5^Q:556-600,H:192-236^40%ID^E:-13.9084^RecName: Full=Protein translocase subunit SecA;^Bacteria; Bacteroidetes; Flavobacteriia; Flavobacteriales; Candidatus Sulcia	PF07517.9^SecA_DEAD^SecA DEAD-like domain^427-1035^E:3e-38`PF00271.26^Helicase_C^Helicase conserved C-terminal domain^1130-1193^E:0.0021	.	.	COG0653^Preprotein translocase subunit SecA (ATPase, RNA helicase)	GO:0005737^cellular_component^cytoplasm`GO:0005886^cellular_component^plasma membrane`GO:0005524^molecular_function^ATP binding`GO:0004386^molecular_function^helicase activity`GO:0003676^molecular_function^nucleic acid binding`GO:0017038^biological_process^protein import`GO:0006605^biological_process^protein targeting
comp11244_c0_seq1	0.175216	-1.96305	1	1	1	2	2	2.32193	comp11244_c0	sp|Q96RW7|HMCN1_HUMAN^Q96RW7^Q:214-2,H:422-492^63.3803%ID^E:-19.62^RecName: Full=Hemicentin-1;^Eukaryota; Metazoa; Chordata; Craniata; Vertebrata; Euteleostomi; Mammalia; Eutheria; Euarchontoglires; Primates; Haplorrhini; Catarrhini; Hominidae; Homo	.	.	.	.	.	.	.	NOG12793^Calcium ion binding protein	GO:0005604^cellular_component^basement membrane`GO:0005938^cellular_component^cell cortex`GO:0030054^cellular_component^cell junction`GO:0005509^molecular_function^calcium ion binding`GO:0050896^biological_process^response to stimulus`GO:0007601^biological_process^visual perception	.
comp11246_c0_seq1	5.48831	-1.6319	0.266972	1	-Inf	3.45943	2.80735	2	comp11246_c0	.	.	.	.	.	.	.	.	.	.	.
comp11247_c0_seq1	-2.05446	-1.74364	0.370275	1	2.32193	3.16993	1	1.58496	comp11247_c0	.	.	.	.	.	.	.	.	.	.	.
comp11248_c0_seq1	5.01568	-1.34822	0.33457	1	-Inf	4.45943	2.32193	1.58496	comp11248_c0	.	.	.	.	.	.	.	.	.	.	.
comp1125_c0_seq1	0.17763	-1.63383	1	1	1.58496	2.80735	2.58496	2.32193	comp1125_c0	.	.	.	.	.	.	.	.	.	.	.
comp11251_c0_seq1	0.0562995	-1.23168	1	1	2.58496	3.32193	3.45943	1.58496	comp11251_c0	.	.	.	.	.	.	.	.	.	.	.
comp11253_c0_seq1	-0.267001	6.63722	0.861762	1	10.2384	12.1322	10.7887	10.9159	comp11253_c0	sp|Q5XI32|CAPZB_RAT^Q5XI32^Q:108-905,H:1-266^98.4962%ID^E:-149.33^RecName: Full=F-actin-capping protein subunit beta;^Eukaryota; Metazoa; Chordata; Craniata; Vertebrata; Euteleostomi; Mammalia; Eutheria; Euarchontoglires; Glires; Rodentia; Sciurognathi; Muroidea; Muridae; Murinae; Rattus	.	m.4600	108-926[+]	sp|Q5R507|CAPZB_PONAB^Q5R507^Q:1-271,H:1-271^98.155%ID^E:-151.99^RecName: Full=F-actin-capping protein subunit beta;^Eukaryota; Metazoa; Chordata; Craniata; Vertebrata; Euteleostomi; Mammalia; Eutheria; Euarchontoglires; Primates; Haplorrhini; Catarrhini; Hominidae; Pongo	PF01115.12^F_actin_cap_B^F-actin capping protein, beta subunit^5-240^E:6.8e-111	.	.	.	GO:0008290^cellular_component^F-actin capping protein complex`GO:0071203^cellular_component^WASH complex`GO:0030036^biological_process^actin cytoskeleton organization`GO:0051693^biological_process^actin filament capping`GO:0007010^biological_process^cytoskeleton organization`GO:0022604^biological_process^regulation of cell morphogenesis
comp11253_c0_seq2	-4.39765	4.41701	0.017172	0.507987	9.77314	8.76487	6.18982	-Inf	comp11253_c0	sp|P14315|CAPZB_CHICK^P14315^Q:108-938,H:1-277^98.917%ID^E:-157.15^RecName: Full=F-actin-capping protein subunit beta isoforms 1 and 2;^Eukaryota; Metazoa; Chordata; Craniata; Vertebrata; Euteleostomi; Archosauria; Dinosauria; Saurischia; Theropoda; Coelurosauria; Aves; Neognathae; Galliformes; Phasianidae; Phasianinae; Gallus	.	m.4602	108-941[+]	sp|P14315|CAPZB_CHICK^P14315^Q:1-277,H:1-277^98.917%ID^E:-157.31^RecName: Full=F-actin-capping protein subunit beta isoforms 1 and 2;^Eukaryota; Metazoa; Chordata; Craniata; Vertebrata; Euteleostomi; Archosauria; Dinosauria; Saurischia; Theropoda; Coelurosauria; Aves; Neognathae; Galliformes; Phasianidae; Phasianinae; Gallus	PF01115.12^F_actin_cap_B^F-actin capping protein, beta subunit^5-240^E:7.3e-111	.	.	.	GO:0030863^cellular_component^cortical cytoskeleton`GO:0005829^cellular_component^cytosol`GO:0008290^cellular_component^F-actin capping protein complex`GO:0030027^cellular_component^lamellipodium`GO:0016020^cellular_component^membrane`GO:0071203^cellular_component^WASH complex`GO:0030036^biological_process^actin cytoskeleton organization`GO:0051693^biological_process^actin filament capping`GO:000…
comp11254_c0_seq1	0.74162	-1.79645	0.8692	1	1	2.58496	2.58496	2	comp11254_c0	sp|P08548|LIN1_NYCCO^P08548^Q:51-242,H:516-582^37.3134%ID^E:-6.4^RecName: Full=LINE-1 reverse transcriptase homolog;^Eukaryota; Metazoa; Chordata; Craniata; Vertebrata; Euteleostomi; Mammalia; Eutheria; Euarchontoglires; Primates; Strepsirrhini; Chiromyiformes; Lorisidae; Nycticebus	.	.	.	.	.	.	.	.	GO:0046872^molecular_function^metal ion binding`GO:0003723^molecular_function^RNA binding`GO:0003964^molecular_function^RNA-directed DNA polymerase activity`GO:0006278^biological_process^RNA-dependent DNA replication	.
comp11255_c0_seq1	4.70486	-1.39624	0.443458	1	-Inf	4.52356	2	1	comp11255_c0	.	.	.	.	.	.	.	.	.	.	.
comp11256_c0_seq1	-0.578559	10.1844	0.795395	1	13.81	15.3913	14.0487	14.9418	comp11256_c0	sp|Q63945|SET_RAT^Q63945^Q:358-960,H:37-237^98.01%ID^E:-110.98^RecName: Full=Protein SET;^Eukaryota; Metazoa; Chordata; Craniata; Vertebrata; Euteleostomi; Mammalia; Eutheria; Euarchontoglires; Glires; Rodentia; Sciurognathi; Muroidea; Muridae; Murinae; Rattus	.	m.4603	304-1122[+]	sp|Q01105|SET_HUMAN^Q01105^Q:19-272,H:38-290^92.5781%ID^E:-135.29^RecName: Full=Protein SET;^Eukaryota; Metazoa; Chordata; Craniata; Vertebrata; Euteleostomi; Mammalia; Eutheria; Euarchontoglires; Primates; Haplorrhini; Catarrhini; Hominidae; Homo	PF00956.13^NAP^Nucleosome assembly protein (NAP)^24-216^E:2e-56	.	.	.	GO:0005829^cellular_component^cytosol`GO:0005783^cellular_component^endoplasmic reticulum`GO:0005654^cellular_component^nucleoplasm`GO:0048471^cellular_component^perinuclear region of cytoplasm`GO:0043234^cellular_component^protein complex`GO:0003677^molecular_function^DNA binding`GO:0042393^molecular_function^histone binding`GO:0004864^molecular_function^protein phosphatase inhibitor activity`GO…
comp11257_c0_seq1	-7.86431	-1.46136	0.0310772	0.626411	4.39232	-Inf	-Inf	-Inf	comp11257_c0	.	.	.	.	.	.	.	.	.	.	.
comp11258_c0_seq1	0.997136	4.62006	0.533675	1	7.59246	8.64746	9.40727	9.70217	comp11258_c0	sp|Q14103|HNRPD_HUMAN^Q14103^Q:554-510,H:325-339^66.6667%ID^E:-89.6798^RecName: Full=Heterogeneous nuclear ribonucleoprotein D0;^Eukaryota; Metazoa; Chordata; Craniata; Vertebrata; Euteleostomi; Mammalia; Eutheria; Euarchontoglires; Primates; Haplorrhini; Catarrhini; Hominidae; Homo	.	m.4607	450-1430[-]	sp|Q14103|HNRPD_HUMAN^Q14103^Q:22-56,H:44-78^45.7143%ID^E:-125.316^RecName: Full=Heterogeneous nuclear ribonucleoprotein D0;^Eukaryota; Metazoa; Chordata; Craniata; Vertebrata; Euteleostomi; Mammalia; Eutheria; Euarchontoglires; Primates; Haplorrhini; Catarrhini; Hominidae; Homo	PF00076.17^RRM_1^RNA recognition motif. (a.k.a. RRM, RBD, or RNP domain)^59-126^E:7.4e-19`PF14259.1^RRM_6^RNA recognition motif (a.k.a. RRM, RBD, or RNP domain)^59-126^E:5.2e-15`PF00076.17^RRM_1^RNA recognition motif. (a.k.a. RRM, RBD, or RNP domain)^143-201^E:7.7e-18`PF14259.1^RRM_6^RNA recognition motif (a.k.a. RRM, RBD, or RNP domain)^143-207^E:4.5e-14	.	.	COG0724^RNA-binding proteins (RRM domain)	GO:0005829^cellular_component^cytosol`GO:0005654^cellular_component^nucleoplasm`GO:0030529^cellular_component^ribonucleoprotein complex`GO:0000166^molecular_function^nucleotide binding`GO:0003723^molecular_function^RNA binding`GO:0042162^molecular_function^telomeric DNA binding`GO:0000398^biological_process^mRNA splicing, via spliceosome`GO:0048255^biological_process^mRNA stabilization`GO:0045893…
comp11258_c0_seq2	0.451228	7.09307	0.775823	1	9.92184	12.6902	11.1904	11.8301	comp11258_c0	sp|Q14103|HNRPD_HUMAN^Q14103^Q:1390-845,H:88-270^84.6995%ID^E:-97.4999^RecName: Full=Heterogeneous nuclear ribonucleoprotein D0;^Eukaryota; Metazoa; Chordata; Craniata; Vertebrata; Euteleostomi; Mammalia; Eutheria; Euarchontoglires; Primates; Haplorrhini; Catarrhini; Hominidae; Homo	.	m.4610	557-1528[-]	sp|Q14103|HNRPD_HUMAN^Q14103^Q:22-56,H:44-78^45.7143%ID^E:-136.998^RecName: Full=Heterogeneous nuclear ribonucleoprotein D0;^Eukaryota; Metazoa; Chordata; Craniata; Vertebrata; Euteleostomi; Mammalia; Eutheria; Euarchontoglires; Primates; Haplorrhini; Catarrhini; Hominidae; Homo	PF00076.17^RRM_1^RNA recognition motif. (a.k.a. RRM, RBD, or RNP domain)^59-126^E:7.3e-19`PF14259.1^RRM_6^RNA recognition motif (a.k.a. RRM, RBD, or RNP domain)^59-126^E:5.1e-15`PF00076.17^RRM_1^RNA recognition motif. (a.k.a. RRM, RBD, or RNP domain)^143-201^E:7.6e-18`PF14259.1^RRM_6^RNA recognition motif (a.k.a. RRM, RBD, or RNP domain)^143-207^E:4.5e-14	.	.	COG0724^RNA-binding proteins (RRM domain)	GO:0005829^cellular_component^cytosol`GO:0005654^cellular_component^nucleoplasm`GO:0030529^cellular_component^ribonucleoprotein complex`GO:0000166^molecular_function^nucleotide binding`GO:0003723^molecular_function^RNA binding`GO:0042162^molecular_function^telomeric DNA binding`GO:0000398^biological_process^mRNA splicing, via spliceosome`GO:0048255^biological_process^mRNA stabilization`GO:0045893…
comp11258_c0_seq2	0.451228	7.09307	0.775823	1	9.92184	12.6902	11.1904	11.8301	comp11258_c0	sp|Q14103|HNRPD_HUMAN^Q14103^Q:1390-845,H:88-270^84.6995%ID^E:-97.4999^RecName: Full=Heterogeneous nuclear ribonucleoprotein D0;^Eukaryota; Metazoa; Chordata; Craniata; Vertebrata; Euteleostomi; Mammalia; Eutheria; Euarchontoglires; Primates; Haplorrhini; Catarrhini; Hominidae; Homo	.	m.4611	299-1243[+]	.	.	.	ExpAA=72.20^PredHel=3^Topology=i86-108o112-134i268-290o	.	.
comp1126_c0_seq1	2.40242	-1.35695	0.318606	1	0	3.58496	3.32193	2.32193	comp1126_c0	.	.	.	.	.	.	.	.	.	.	.
comp11260_c0_seq1	1.11407	-1.64768	0.770178	1	0	3.80735	2	1.58496	comp11260_c0	.	.	.	.	.	.	.	.	.	.	.
comp11261_c0_seq1	1.89752	-0.727161	0.504475	1	0	4.85798	2.80735	3.70044	comp11261_c0	sp|Q9Y5Y0|FLVC1_HUMAN^Q9Y5Y0^Q:550-146,H:421-555^74.0741%ID^E:-53.28^RecName: Full=Feline leukemia virus subgroup C receptor-related protein 1;^Eukaryota; Metazoa; Chordata; Craniata; Vertebrata; Euteleostomi; Mammalia; Eutheria; Euarchontoglires; Primates; Haplorrhini; Catarrhini; Hominidae; Homo	.	m.4613	143-550[-]	sp|Q9Y5Y0|FLVC1_HUMAN^Q9Y5Y0^Q:1-135,H:421-555^74.0741%ID^E:-53.59^RecName: Full=Feline leukemia virus subgroup C receptor-related protein 1;^Eukaryota; Metazoa; Chordata; Craniata; Vertebrata; Euteleostomi; Mammalia; Eutheria; Euarchontoglires; Primates; Haplorrhini; Catarrhini; Hominidae; Homo	.	.	ExpAA=52.35^PredHel=3^Topology=o5-27i40-62o72-91i	.	GO:0005887^cellular_component^integral to plasma membrane`GO:0015232^molecular_function^heme transporter activity`GO:0008219^biological_process^cell death`GO:0006879^biological_process^cellular iron ion homeostasis`GO:0042733^biological_process^embryonic digit morphogenesis`GO:0030218^biological_process^erythrocyte differentiation`GO:0060323^biological_process^head morphogenesis`GO:0097037^biolog…
comp11263_c0_seq1	-0.79321	-1.36597	0.867801	1	2	4	2	2	comp11263_c0	sp|Q0V9S3|CTIF_XENTR^Q0V9S3^Q:20-292,H:211-301^53.7634%ID^E:-22.4^RecName: Full=CBP80/20-dependent translation initiation factor;^Eukaryota; Metazoa; Chordata; Craniata; Vertebrata; Euteleostomi; Amphibia; Batrachia; Anura; Pipoidea; Pipidae; Xenopodinae; Xenopus; Silurana	.	.	.	.	.	.	.	.	GO:0048471^cellular_component^perinuclear region of cytoplasm`GO:0003677^molecular_function^DNA binding`GO:0003723^molecular_function^RNA binding`GO:0000184^biological_process^nuclear-transcribed mRNA catabolic process, nonsense-mediated decay`GO:0006446^biological_process^regulation of translational initiation	.
comp11264_c0_seq1	-5.8136	-2.00883	0.222835	1	2.32193	2	-Inf	2.32193	comp11264_c0	.	.	.	.	.	.	.	.	.	.	.
comp11265_c0_seq1	-0.79321	-1.37269	0.867819	1	2	3.45943	2	3	comp11265_c0	.	.	.	.	.	.	.	.	.	.	.
comp11266_c0_seq1	-1.276	-1.67577	0.661207	1	2.80735	1	2.32193	2.32193	comp11266_c0	.	.	.	.	.	.	.	.	.	.	.
comp11268_c0_seq1	0.899575	-0.90686	0.7222	1	1.58496	3.58496	3.32193	3.90689	comp11268_c0	sp|Q9P2P6|STAR9_HUMAN^Q9P2P6^Q:89-448,H:640-761^41.8033%ID^E:-16.64^RecName: Full=StAR-related lipid transfer protein 9;^Eukaryota; Metazoa; Chordata; Craniata; Vertebrata; Euteleostomi; Mammalia; Eutheria; Euarchontoglires; Primates; Haplorrhini; Catarrhini; Hominidae; Homo	.	m.4614	2-451[+]	sp|Q9P2P6|STAR9_HUMAN^Q9P2P6^Q:30-149,H:640-761^41.8033%ID^E:-16.65^RecName: Full=StAR-related lipid transfer protein 9;^Eukaryota; Metazoa; Chordata; Craniata; Vertebrata; Euteleostomi; Mammalia; Eutheria; Euarchontoglires; Primates; Haplorrhini; Catarrhini; Hominidae; Homo	.	.	.	COG5059^Kinesin-like protein	GO:0005814^cellular_component^centriole`GO:0005875^cellular_component^microtubule associated complex`GO:0005634^cellular_component^nucleus`GO:0005524^molecular_function^ATP binding`GO:0008017^molecular_function^microtubule binding`GO:0003777^molecular_function^microtubule motor activity`GO:0007018^biological_process^microtubule-based movement`GO:0051225^biological_process^spindle assembly
comp11269_c0_seq1	5.01568	-2.07764	0.341826	1	-Inf	-Inf	2.32193	3	comp11269_c0	.	.	.	.	.	.	.	.	.	.	.
comp11269_c0_seq2	-2.17388	-1.31906	0.341714	1	3	2.80735	1.58496	3.16993	comp11269_c0	.	.	.	.	.	.	.	.	.	.	.
comp1127_c0_seq1	2.21974	-0.707333	0.380864	1	1	3.58496	4.08746	4	comp1127_c0	.	.	.	.	.	.	.	.	.	.	.
comp11270_c0_seq1	0.315052	-1.03387	1	1	2.32193	4.16993	3.45943	1.58496	comp11270_c0	.	.	.	.	.	.	.	.	.	.	.
comp11271_c0_seq1	-0.353368	-1.05478	0.877726	1	3	3	3.45943	2.80735	comp11271_c0	.	.	.	.	.	.	.	.	.	.	.
comp11272_c0_seq1	-0.138388	0.292949	0.969439	1	3.90689	5.24793	4.58496	4.64386	comp11272_c0	.	.	.	.	.	.	.	.	.	.	.
comp11273_c0_seq1	-2.43793	-0.671835	0.25003	1	4.64386	3.16993	3	0	comp11273_c0	.	.	.	.	.	.	.	.	.	.	.
comp11276_c0_seq1	-0.38578	7.68022	0.817626	1	11.4858	12.8263	11.9174	12.0698	comp11276_c0	sp|P41091|IF2G_HUMAN^P41091^Q:1872-457,H:1-472^97.4576%ID^E:-264.14^RecName: Full=Eukaryotic translation initiation factor 2 subunit 3;^Eukaryota; Metazoa; Chordata; Craniata; Vertebrata; Euteleostomi; Mammalia; Eutheria; Euarchontoglires; Primates; Haplorrhini; Catarrhini; Hominidae; Homo	.	m.4615	454-1872[-]	sp|P41091|IF2G_HUMAN^P41091^Q:1-472,H:1-472^97.4576%ID^E:-264.36^RecName: Full=Eukaryotic translation initiation factor 2 subunit 3;^Eukaryota; Metazoa; Chordata; Craniata; Vertebrata; Euteleostomi; Mammalia; Eutheria; Euarchontoglires; Primates; Haplorrhini; Catarrhini; Hominidae; Homo	PF00009.22^GTP_EFTU^Elongation factor Tu GTP binding domain^40-244^E:2.4e-39`PF03144.20^GTP_EFTU_D2^Elongation factor Tu domain 2^276-359^E:8.5e-12`PF09173.6^eIF2_C^Initiation factor eIF2 gamma, C terminal^368-459^E:3e-37	.	.	COG5257^Translation initiation factor 2, gamma subunit (eIF-2gamma; GTPase)	GO:0005829^cellular_component^cytosol`GO:0005525^molecular_function^GTP binding`GO:0003924^molecular_function^GTPase activity`GO:0003743^molecular_function^translation initiation factor activity
comp11277_c0_seq1	-5.66836	9.7058	0.0244897	0.57238	15.001	14.4366	10.1497	2.58496	comp11277_c0	sp|P02616|PRVB_AMPME^P02616^Q:645-322,H:1-108^81.4815%ID^E:-41.8^RecName: Full=Parvalbumin beta;^Eukaryota; Metazoa; Chordata; Craniata; Vertebrata; Euteleostomi; Amphibia; Batrachia; Caudata; Salamandroidea; Amphiumidae; Amphiuma	.	m.4616	316-732[-]	sp|P02616|PRVB_AMPME^P02616^Q:30-137,H:1-108^81.4815%ID^E:-42.35^RecName: Full=Parvalbumin beta;^Eukaryota; Metazoa; Chordata; Craniata; Vertebrata; Euteleostomi; Amphibia; Batrachia; Caudata; Salamandroidea; Amphiumidae; Amphiuma	PF13499.1^EF_hand_5^EF-hand domain pair^71-134^E:4.3e-09`PF13405.1^EF_hand_4^EF-hand domain^72-97^E:0.0012`PF13833.1^EF_hand_6^EF-hand domain pair^85-136^E:1.1e-05`PF13202.1^EF_hand_3^EF hand^119-135^E:0.0058	.	.	.	GO:0005509^molecular_function^calcium ion binding
comp11278_c0_seq1	5.99321	-1.40563	0.155064	1	-Inf	4.16993	3.32193	-Inf	comp11278_c0	.	.	.	.	.	.	.	.	.	.	.
comp11279_c0_seq1	-1.43872	-0.308396	0.514178	1	3.80735	4.45943	3.16993	4.16993	comp11279_c0	.	.	.	.	.	.	.	.	.	.	.
comp1128_c0_seq1	-1.16184	-1.22385	0.600188	1	3.16993	2.58496	2.80735	2.80735	comp1128_c0	.	.	.	.	.	.	.	.	.	.	.
comp11280_c0_seq1	-0.482389	-1.40993	1	1	2	2	2.32193	3.58496	comp11280_c0	.	.	.	.	.	.	.	.	.	.	.
comp11281_c0_seq1	0	-1.11802	1	1	-Inf	5.24793	-Inf	0	comp11281_c0	.	.	.	.	.	.	.	.	.	.	.
comp11285_c0_seq1	-1.06846	10.2628	0.637171	1	14.4009	15.725	14.1497	14.0329	comp11285_c0	sp|Q7T3N9|RL15_CARAU^Q7T3N9^Q:685-512,H:1-58^98.2759%ID^E:-103.915^RecName: Full=60S ribosomal protein L15;^Eukaryota; Metazoa; Chordata; Craniata; Vertebrata; Euteleostomi; Actinopterygii; Neopterygii; Teleostei; Ostariophysi; Cypriniformes; Cyprinidae; Carassius	.	m.4619	2-334[+]	.	.	sigP:1^20^0.533^YES	.	.	.
comp11285_c0_seq1	-1.06846	10.2628	0.637171	1	14.4009	15.725	14.1497	14.0329	comp11285_c0	sp|Q7T3N9|RL15_CARAU^Q7T3N9^Q:685-512,H:1-58^98.2759%ID^E:-103.915^RecName: Full=60S ribosomal protein L15;^Eukaryota; Metazoa; Chordata; Craniata; Vertebrata; Euteleostomi; Actinopterygii; Neopterygii; Teleostei; Ostariophysi; Cypriniformes; Cyprinidae; Carassius	.	m.4618	71-685[-]	sp|P61368|RL15_HYDVU^P61368^Q:1-204,H:1-204^96.5686%ID^E:-114.99^RecName: Full=60S ribosomal protein L15;^Eukaryota; Metazoa; Cnidaria; Hydrozoa; Hydroida; Anthomedusae; Hydridae; Hydra	PF00827.12^Ribosomal_L15e^Ribosomal L15^2-193^E:1.8e-94	.	.	.	GO:0005840^cellular_component^ribosome`GO:0003735^molecular_function^structural constituent of ribosome`GO:0006412^biological_process^translation
comp11286_c0_seq1	1.11407	-1.53155	0.769636	1	0	4.16993	2	1	comp11286_c0	.	.	.	.	.	.	.	.	.	.	.
comp11287_c0_seq1	5.67693	-1.48899	0.217261	1	-Inf	2.32193	3	3.45943	comp11287_c0	.	.	.	.	.	.	.	.	.	.	.
comp1129_c0_seq1	5.84372	-1.50449	0.182296	1	-Inf	2.80735	3.16993	3	comp1129_c0	.	.	.	.	.	.	.	.	.	.	.
comp11290_c0_seq1	4.30815	-1.91516	0.6319	1	-Inf	3.58496	1.58496	1	comp11290_c0	.	.	.	.	.	.	.	.	.	.	.
comp11291_c0_seq1	5.67693	-1.36859	0.216285	1	-Inf	2.80735	3	3.58496	comp11291_c0	.	.	.	.	.	.	.	.	.	.	.
comp11293_c0_seq1	-1.78504	-1.03942	0.472817	1	3.32193	3.70044	2.32193	2.80735	comp11293_c0	.	.	.	.	.	.	.	.	.	.	.
comp11294_c0_seq1	-0.482389	-1.33858	1	1	2	4.16993	2.32193	1	comp11294_c0	.	.	.	.	.	.	.	.	.	.	.
comp11295_c0_seq1	-8.71715	-0.683467	0.0133477	0.472133	5.24793	-Inf	-Inf	-Inf	comp11295_c0	.	.	.	.	.	.	.	.	.	.	.
comp11297_c0_seq1	-0.00986995	-0.730112	1	1	3	3.58496	3.80735	3.45943	comp11297_c0	sp|P11369|POL2_MOUSE^P11369^Q:399-82,H:469-575^32.7103%ID^E:-10.44^RecName: Full=Retrovirus-related Pol polyprotein LINE-1;^Eukaryota; Metazoa; Chordata; Craniata; Vertebrata; Euteleostomi; Mammalia; Eutheria; Euarchontoglires; Glires; Rodentia; Sciurognathi; Muroidea; Muridae; Murinae; Mus; Mus	.	.	.	.	.	.	.	.	GO:0004519^molecular_function^endonuclease activity`GO:0046872^molecular_function^metal ion binding`GO:0003723^molecular_function^RNA binding`GO:0003964^molecular_function^RNA-directed DNA polymerase activity`GO:0090305^biological_process^nucleic acid phosphodiester bond hydrolysis`GO:0006278^biological_process^RNA-dependent DNA replication	.
comp11298_c0_seq1	-2.75345	-1.33207	0.226377	1	3.58496	3.58496	1.58496	-Inf	comp11298_c0	sp|Q80YP6|ZIK1_MOUSE^Q80YP6^Q:149-223,H:14-38^64%ID^E:-1.75^RecName: Full=Zinc finger protein interacting with ribonucleoprotein K;^Eukaryota; Metazoa; Chordata; Craniata; Vertebrata; Euteleostomi; Mammalia; Eutheria; Euarchontoglires; Glires; Rodentia; Sciurognathi; Muroidea; Muridae; Murinae; Mus; Mus	.	.	.	.	.	.	.	COG5048^FOG: Zn-finger	GO:0005634^cellular_component^nucleus`GO:0003677^molecular_function^DNA binding`GO:0046872^molecular_function^metal ion binding`GO:0008270^molecular_function^zinc ion binding`GO:0006355^biological_process^regulation of transcription, DNA-dependent`GO:0006351^biological_process^transcription, DNA-dependent	.
comp1130_c0_seq1	1.89752	-1.62596	0.508769	1	0	3.45943	2.80735	1.58496	comp1130_c0	.	.	.	.	.	.	.	.	.	.	.
comp11300_c0_seq1	0.0301205	-0.876717	1	1	2.32193	3.80735	3.16993	3.70044	comp11300_c0	sp|Q8R3L5|SO3A1_MOUSE^Q8R3L5^Q:333-1,H:107-217^94.5946%ID^E:-56.03^RecName: Full=Solute carrier organic anion transporter family member 3A1;^Eukaryota; Metazoa; Chordata; Craniata; Vertebrata; Euteleostomi; Mammalia; Eutheria; Euarchontoglires; Glires; Rodentia; Sciurognathi; Muroidea; Muridae; Murinae; Mus; Mus	.	m.4620	1-333[-]	sp|Q8R3L5|SO3A1_MOUSE^Q8R3L5^Q:1-111,H:107-217^94.5946%ID^E:-56.03^RecName: Full=Solute carrier organic anion transporter family member 3A1;^Eukaryota; Metazoa; Chordata; Craniata; Vertebrata; Euteleostomi; Mammalia; Eutheria; Euarchontoglires; Glires; Rodentia; Sciurognathi; Muroidea; Muridae; Murinae; Mus; Mus	PF03137.15^OATP^Organic Anion Transporter Polypeptide (OATP) family^1-111^E:2.9e-32	sigP:1^18^0.654^YES	ExpAA=33.16^PredHel=1^Topology=i71-93o	.	GO:0016021^cellular_component^integral to membrane`GO:0005886^cellular_component^plasma membrane`GO:0005215^molecular_function^transporter activity`GO:0006811^biological_process^ion transport
comp11301_c0_seq1	-0.542336	-1.45042	0.800597	1	2.32193	2	2.58496	3.16993	comp11301_c0	.	.	.	.	.	.	.	.	.	.	.
comp11302_c0_seq1	0.608056	0.462329	0.78594	1	3.70044	5.16993	5.12928	4.9542	comp11302_c0	.	.	.	.	.	.	.	.	.	.	.
comp11303_c0_seq1	6.12865	-1.60284	0.156714	1	-Inf	2.80735	3.45943	2	comp11303_c0	.	.	.	.	.	.	.	.	.	.	.
comp11305_c0_seq1	0.82657	1.14884	0.715298	1	3.90689	7.10852	5.55459	4.16993	comp11305_c0	.	.	.	.	.	.	.	.	.	.	.
comp11307_c0_seq1	0.0992368	-0.480924	1	1	3.16993	3.90689	4.08746	3.80735	comp11307_c0	.	.	.	.	.	.	.	.	.	.	.
comp11308_c0_seq1	0.616761	-0.468011	0.796654	1	2.80735	3.90689	4.24793	3.90689	comp11308_c0	sp|P56277|MTCNB_HUMAN^P56277^Q:13-186,H:1-58^86.2069%ID^E:-23.58^RecName: Full=Cx9C motif-containing protein 4;^Eukaryota; Metazoa; Chordata; Craniata; Vertebrata; Euteleostomi; Mammalia; Eutheria; Euarchontoglires; Primates; Haplorrhini; Catarrhini; Hominidae; Homo	.	.	.	.	.	.	.	NOG71889^Mature T-cell proliferation-1 protein	GO:0005739^cellular_component^mitochondrion`GO:0008283^biological_process^cell proliferation	.
comp11309_c0_seq1	0.717353	-1.39023	1	1	0	4.52356	1.58496	1	comp11309_c0	.	.	.	.	.	.	.	.	.	.	.
comp1131_c0_seq1	1.68047	-2.08042	0.513954	1	0	0	2.58496	2.32193	comp1131_c0	.	.	.	.	.	.	.	.	.	.	.
comp11313_c0_seq1	0.630582	-0.782851	0.826859	1	2	4.45943	3.45943	3.16993	comp11313_c0	sp|O75920|SERF1_HUMAN^O75920^Q:276-178,H:7-39^48.4848%ID^E:-0.33^RecName: Full=Small EDRK-rich factor 1;^Eukaryota; Metazoa; Chordata; Craniata; Vertebrata; Euteleostomi; Mammalia; Eutheria; Euarchontoglires; Primates; Haplorrhini; Catarrhini; Hominidae; Homo	.	.	.	.	.	.	.	KOG4488^Small EDRK-rich protein H4F5	GO:0007399^biological_process^nervous system development	.
comp11315_c0_seq1	-0.570559	-0.606235	0.811473	1	3.45943	3	3.70044	4	comp11315_c0	.	.	.	.	.	.	.	.	.	.	.
comp11316_c0_seq1	0.958666	-1.40759	0.867911	1	1	3	2.80735	3.16993	comp11316_c0	.	.	.	.	.	.	.	.	.	.	.
comp11317_c0_seq1	-1.78504	-0.829415	0.472405	1	3.32193	4	2.32193	3.45943	comp11317_c0	.	.	.	.	.	.	.	.	.	.	.
comp11318_c0_seq1	0.959902	0.220908	0.67094	1	3.16993	4.58496	4.9542	4.9542	comp11318_c0	.	.	.	.	.	.	.	.	.	.	.
comp11319_c0_seq1	2.75183	1.56296	0.214332	1	2.80735	6.89482	6.39232	6.10852	comp11319_c0	sp|Q02224|CENPE_HUMAN^Q02224^Q:1331-879,H:602-752^42.3841%ID^E:-27.02^RecName: Full=Centromere-associated protein E;^Eukaryota; Metazoa; Chordata; Craniata; Vertebrata; Euteleostomi; Mammalia; Eutheria; Euarchontoglires; Primates; Haplorrhini; Catarrhini; Hominidae; Homo	.	m.4623	495-1358[-]	sp|Q02224|CENPE_HUMAN^Q02224^Q:10-160,H:602-752^42.3841%ID^E:-27.3^RecName: Full=Centromere-associated protein E;^Eukaryota; Metazoa; Chordata; Craniata; Vertebrata; Euteleostomi; Mammalia; Eutheria; Euarchontoglires; Primates; Haplorrhini; Catarrhini; Hominidae; Homo	.	.	.	COG5059^Kinesin-like protein	GO:0000777^cellular_component^condensed chromosome kinetochore`GO:0000779^cellular_component^condensed chromosome, centromeric region`GO:0005829^cellular_component^cytosol`GO:0000776^cellular_component^kinetochore`GO:0005874^cellular_component^microtubule`GO:0005875^cellular_component^microtubule associated complex`GO:0005634^cellular_component^nucleus`GO:0005819^cellular_component^spindle`GO:000…
comp11322_c0_seq1	-0.296997	8.40132	0.869935	1	12.1273	13.3435	12.6477	13.0381	comp11322_c0	sp|Q9DET5|TB15A_COTJA^Q9DET5^Q:1020-886,H:1-45^75.5556%ID^E:-11.14^RecName: Full=Thymosin beta-15A homolog;^Eukaryota; Metazoa; Chordata; Craniata; Vertebrata; Euteleostomi; Archosauria; Dinosauria; Saurischia; Theropoda; Coelurosauria; Aves; Neognathae; Galliformes; Phasianidae; Perdicinae; Coturnix	.	.	.	.	.	.	.	.	GO:0005737^cellular_component^cytoplasm`GO:0005856^cellular_component^cytoskeleton`GO:0030036^biological_process^actin cytoskeleton organization`GO:0042989^biological_process^sequestering of actin monomers	.
comp11323_c0_seq1	0.468212	4.89468	0.765717	1	8.01123	10.23	9.29692	9.50978	comp11323_c0	sp|P36896|ACV1B_HUMAN^P36896^Q:78-1532,H:13-505^84.507%ID^E:-242.6^RecName: Full=Activin receptor type-1B;^Eukaryota; Metazoa; Chordata; Craniata; Vertebrata; Euteleostomi; Mammalia; Eutheria; Euarchontoglires; Primates; Haplorrhini; Catarrhini; Hominidae; Homo	.	m.4626	3-1535[+]	sp|P36896|ACV1B_HUMAN^P36896^Q:12-510,H:1-505^86.1386%ID^E:-255.85^RecName: Full=Activin receptor type-1B;^Eukaryota; Metazoa; Chordata; Craniata; Vertebrata; Euteleostomi; Mammalia; Eutheria; Euarchontoglires; Primates; Haplorrhini; Catarrhini; Hominidae; Homo	PF01064.18^Activin_recp^Activin types I and II receptor domain^41-112^E:2.3e-11`PF08515.7^TGF_beta_GS^Transforming growth factor beta type I GS-motif^182-210^E:7.9e-15`PF07714.12^Pkinase_Tyr^Protein tyrosine kinase^213-498^E:4.6e-33`PF00069.20^Pkinase^Protein kinase domain^214-497^E:1.4e-50	sigP:1^40^0.777^YES	ExpAA=39.46^PredHel=1^Topology=i132-154o	COG0515^Serine/threonine protein kinase	GO:0048179^cellular_component^activin receptor complex`GO:0009986^cellular_component^cell surface`GO:0005887^cellular_component^integral to plasma membrane`GO:0016361^molecular_function^activin receptor activity, type I`GO:0005524^molecular_function^ATP binding`GO:0046872^molecular_function^metal ion binding`GO:0004702^molecular_function^receptor signaling protein serine/threonine kinase activity…
comp11323_c0_seq1	0.468212	4.89468	0.765717	1	8.01123	10.23	9.29692	9.50978	comp11323_c0	sp|P36896|ACV1B_HUMAN^P36896^Q:78-1532,H:13-505^84.507%ID^E:-242.6^RecName: Full=Activin receptor type-1B;^Eukaryota; Metazoa; Chordata; Craniata; Vertebrata; Euteleostomi; Mammalia; Eutheria; Euarchontoglires; Primates; Haplorrhini; Catarrhini; Hominidae; Homo	.	m.4628	2872-3264[-]	.	.	.	.	.	.
comp11324_c0_seq1	-9.42209	0.0384617	0.00780251	0.425409	5.9542	-Inf	-Inf	-Inf	comp11324_c0	.	.	.	.	.	.	.	.	.	.	.
comp11325_c0_seq2	0.750086	-1.65617	0.801639	1	1.58496	1.58496	3.16993	2.32193	comp11325_c0	.	.	.	.	.	.	.	.	.	.	.
comp11326_c0_seq1	-0.226806	-1.19133	1	1	2	3.80735	2.58496	3	comp11326_c0	.	.	.	.	.	.	.	.	.	.	.
comp11327_c0_seq1	2.3721	4.78539	0.149192	1	6.08746	9.75822	9.27845	10.0647	comp11327_c0	sp|Q5NVM4|TEBP_PONAB^Q5NVM4^Q:2171-1758,H:1-138^76.8116%ID^E:-59.77^RecName: Full=Prostaglandin E synthase 3;^Eukaryota; Metazoa; Chordata; Craniata; Vertebrata; Euteleostomi; Mammalia; Eutheria; Euarchontoglires; Primates; Haplorrhini; Catarrhini; Hominidae; Pongo	.	m.4629	1752-2171[-]	sp|Q5NVM4|TEBP_PONAB^Q5NVM4^Q:1-138,H:1-138^76.8116%ID^E:-61.02^RecName: Full=Prostaglandin E synthase 3;^Eukaryota; Metazoa; Chordata; Craniata; Vertebrata; Euteleostomi; Mammalia; Eutheria; Euarchontoglires; Primates; Haplorrhini; Catarrhini; Hominidae; Pongo	PF04969.11^CS^CS domain^6-79^E:1.1e-11	.	.	.	GO:0005737^cellular_component^cytoplasm`GO:0005697^cellular_component^telomerase holoenzyme complex`GO:0050220^molecular_function^prostaglandin-E synthase activity`GO:0003720^molecular_function^telomerase activity`GO:0070389^biological_process^chaperone cofactor-dependent protein refolding`GO:0001516^biological_process^prostaglandin biosynthetic process
comp11327_c0_seq2	1.31367	7.55469	0.432591	1	9.94105	12.7292	12.0721	12.5328	comp11327_c0	sp|Q5NVM4|TEBP_PONAB^Q5NVM4^Q:2234-1812,H:1-141^84.3972%ID^E:-71.6084^RecName: Full=Prostaglandin E synthase 3;^Eukaryota; Metazoa; Chordata; Craniata; Vertebrata; Euteleostomi; Mammalia; Eutheria; Euarchontoglires; Primates; Haplorrhini; Catarrhini; Hominidae; Pongo	.	m.4631	1752-2234[-]	sp|Q6PWL5|TEBP_MACFA^Q6PWL5^Q:1-160,H:1-160^85%ID^E:-80.56^RecName: Full=Prostaglandin E synthase 3;^Eukaryota; Metazoa; Chordata; Craniata; Vertebrata; Euteleostomi; Mammalia; Eutheria; Euarchontoglires; Primates; Haplorrhini; Catarrhini; Cercopithecidae; Cercopithecinae; Macaca	PF04969.11^CS^CS domain^6-79^E:1.6e-11	.	.	.	GO:0005737^cellular_component^cytoplasm`GO:0050220^molecular_function^prostaglandin-E synthase activity`GO:0001516^biological_process^prostaglandin biosynthetic process
comp1133_c0_seq1	2.53786	-1.41482	0.319153	1	0	3.80735	3.45943	0	comp1133_c0	.	.	.	.	.	.	.	.	.	.	.
comp11331_c0_seq1	-1.50545	-1.53528	0.533479	1	2.32193	3.16993	1.58496	2.58496	comp11331_c0	.	.	.	.	.	.	.	.	.	.	.
comp11332_c0_seq1	0.750086	-1.64818	0.801595	1	1.58496	1	3.16993	2.58496	comp11332_c0	.	.	.	.	.	.	.	.	.	.	.
comp11333_c0_seq1	-1.63447	-1.45626	0.513085	1	3.16993	3	2.32193	1	comp11333_c0	sp|Q5EA98|MFAP1_BOVIN^Q5EA98^Q:231-103,H:210-256^31.9149%ID^E:-0.14^RecName: Full=Microfibrillar-associated protein 1;^Eukaryota; Metazoa; Chordata; Craniata; Vertebrata; Euteleostomi; Mammalia; Eutheria; Laurasiatheria; Cetartiodactyla; Ruminantia; Pecora; Bovidae; Bovinae; Bos	.	.	.	.	.	.	.	NOG122136^Protein involved in nuclear mRNA splicing, via spliceosome	GO:0001527^cellular_component^microfibril	.
comp11334_c0_seq1	-0.508024	8.98283	0.794007	1	12.6808	14.4119	12.9901	13.3663	comp11334_c0	sp|P49393|RS13_XENLA^P49393^Q:95-547,H:1-151^99.3377%ID^E:-80^RecName: Full=40S ribosomal protein S13;^Eukaryota; Metazoa; Chordata; Craniata; Vertebrata; Euteleostomi; Amphibia; Batrachia; Anura; Pipoidea; Pipidae; Xenopodinae; Xenopus; Xenopus	.	m.4633	2-550[+]	sp|P49393|RS13_XENLA^P49393^Q:32-182,H:1-151^99.3377%ID^E:-80.07^RecName: Full=40S ribosomal protein S13;^Eukaryota; Metazoa; Chordata; Craniata; Vertebrata; Euteleostomi; Amphibia; Batrachia; Anura; Pipoidea; Pipidae; Xenopodinae; Xenopus; Xenopus	PF08069.7^Ribosomal_S13_N^Ribosomal S13/S15 N-terminal domain^32-91^E:2.7e-29`PF00312.17^Ribosomal_S15^Ribosomal protein S15^97-181^E:4.4e-23	.	.	.	GO:0005840^cellular_component^ribosome`GO:0003735^molecular_function^structural constituent of ribosome`GO:0006412^biological_process^translation
comp11336_c0_seq1	-0.614747	-1.13027	0.848159	1	2.80735	3.70044	3	2.32193	comp11336_c0	.	.	.	.	.	.	.	.	.	.	.
comp11337_c0_seq1	-0.0328983	-0.00632825	1	1	4.16993	3.90689	4.9542	3.58496	comp11337_c0	.	.	.	.	.	.	.	.	.	.	.
comp11338_c0_seq1	-0.488811	-0.517409	0.807912	1	3	4.39232	3.32193	4	comp11338_c0	.	.	.	.	.	.	.	.	.	.	.
comp11339_c0_seq2	4.30815	-1.899	0.631794	1	-Inf	3.32193	1.58496	2	comp11339_c0	sp|Q91VA3|CAN8_MOUSE^Q91VA3^Q:278-24,H:371-455^76.4706%ID^E:-34.81^RecName: Full=Calpain-8;^Eukaryota; Metazoa; Chordata; Craniata; Vertebrata; Euteleostomi; Mammalia; Eutheria; Euarchontoglires; Glires; Rodentia; Sciurognathi; Muroidea; Muridae; Murinae; Mus; Mus	.	.	.	.	.	.	.	.	GO:0005794^cellular_component^Golgi apparatus`GO:0005509^molecular_function^calcium ion binding`GO:0004198^molecular_function^calcium-dependent cysteine-type endopeptidase activity`GO:0006508^biological_process^proteolysis	.
comp11340_c0_seq1	0.762276	0.0638174	0.708786	1	3.32193	4.85798	4.90689	4.08746	comp11340_c0	.	.	.	.	.	.	.	.	.	.	.
comp11341_c0_seq1	-7.99502	-1.35039	0.027936	0.603606	4.52356	-Inf	-Inf	-Inf	comp11341_c0	sp|P51397|DAP1_HUMAN^P51397^Q:72-218,H:1-48^67.3469%ID^E:-10.35^RecName: Full=Death-associated protein 1;^Eukaryota; Metazoa; Chordata; Craniata; Vertebrata; Euteleostomi; Mammalia; Eutheria; Euarchontoglires; Primates; Haplorrhini; Catarrhini; Hominidae; Homo	.	.	.	.	.	.	.	NOG84666^Death-Associated protein	GO:0006919^biological_process^activation of cysteine-type endopeptidase activity involved in apoptotic process`GO:0097190^biological_process^apoptotic signaling pathway`GO:0006914^biological_process^autophagy`GO:0034198^biological_process^cellular response to amino acid starvation`GO:0010507^biological_process^negative regulation of autophagy`GO:0032088^biological_process^negative regulation of N…	.
comp11343_c0_seq1	-1.98353	-1.40595	0.419999	1	2.80735	3.58496	1.58496	2	comp11343_c0	.	.	.	.	.	.	.	.	.	.	.
comp11344_c0_seq1	-3.21041	-1.84744	0.324421	1	2.58496	0	0	3	comp11344_c0	.	.	.	.	.	.	.	.	.	.	.
comp11346_c0_seq1	0.399798	-0.962472	0.877634	1	2.58496	4.16993	3.80735	0	comp11346_c0	.	.	m.4635	3-377[+]	.	.	.	.	.	.
comp11348_c0_seq1	-0.0779528	-1.17258	1	1	1.58496	4	2.32193	3.16993	comp11348_c0	.	.	.	.	.	.	.	.	.	.	.
comp1135_c0_seq1	0.899575	-1.20934	0.722977	1	1.58496	3.32193	3.32193	3	comp1135_c0	.	.	.	.	.	.	.	.	.	.	.
comp11351_c0_seq1	2.08614	-1.09419	0.424938	1	0	4.58496	3	2	comp11351_c0	.	.	.	.	.	.	.	.	.	.	.
comp11354_c0_seq1	-0.000200121	0.793434	1	1	4.39232	5.80735	5.20945	5.08746	comp11354_c0	.	.	.	.	.	.	.	.	.	.	.
comp11354_c0_seq2	-0.542336	-1.19619	0.799632	1	2.32193	3.32193	2.58496	3.32193	comp11354_c0	.	.	m.4637	72-416[-]	.	.	.	.	.	.
comp11356_c0_seq1	-0.283666	-1.2527	0.946791	1	3.16993	2	3.70044	1	comp11356_c0	.	.	.	.	.	.	.	.	.	.	.
comp11358_c0_seq1	6.12865	-1.90648	0.159838	1	-Inf	1.58496	3.45943	1	comp11358_c0	.	.	.	.	.	.	.	.	.	.	.
comp11359_c0_seq1	0.958666	-1.23492	0.867499	1	1	3.70044	2.80735	3.16993	comp11359_c0	.	.	.	.	.	.	.	.	.	.	.
comp11360_c0_seq1	1.14729	-1.49971	0.762718	1	1	3	3	2.58496	comp11360_c0	.	.	.	.	.	.	.	.	.	.	.
comp11362_c0_seq1	2.13312	-0.90858	0.412928	1	1	4.39232	4	1.58496	comp11362_c0	sp|Q92608|DOCK2_HUMAN^Q92608^Q:447-1,H:641-789^90.604%ID^E:-71.38^RecName: Full=Dedicator of cytokinesis protein 2;^Eukaryota; Metazoa; Chordata; Craniata; Vertebrata; Euteleostomi; Mammalia; Eutheria; Euarchontoglires; Primates; Haplorrhini; Catarrhini; Hominidae; Homo	.	m.4638	1-447[-]	sp|Q92608|DOCK2_HUMAN^Q92608^Q:1-149,H:641-789^90.604%ID^E:-71.38^RecName: Full=Dedicator of cytokinesis protein 2;^Eukaryota; Metazoa; Chordata; Craniata; Vertebrata; Euteleostomi; Mammalia; Eutheria; Euarchontoglires; Primates; Haplorrhini; Catarrhini; Hominidae; Homo	.	.	.	.	GO:0005856^cellular_component^cytoskeleton`GO:0005829^cellular_component^cytosol`GO:0012505^cellular_component^endomembrane system`GO:0016020^cellular_component^membrane`GO:0009055^molecular_function^electron carrier activity`GO:0020037^molecular_function^heme binding`GO:0030675^molecular_function^Rac GTPase activator activity`GO:0030676^molecular_function^Rac guanyl-nucleotide exchange factor ac…
comp11363_c0_seq1	0.958666	-1.39291	0.867872	1	1	3.58496	2.80735	2.58496	comp11363_c0	sp|A4IHW6|GNPI2_XENTR^A4IHW6^Q:3-287,H:165-259^97.8947%ID^E:-46.76^RecName: Full=Glucosamine-6-phosphate isomerase 2;^Eukaryota; Metazoa; Chordata; Craniata; Vertebrata; Euteleostomi; Amphibia; Batrachia; Anura; Pipoidea; Pipidae; Xenopodinae; Xenopus; Silurana	.	.	.	.	.	.	.	.	GO:0005737^cellular_component^cytoplasm`GO:0004342^molecular_function^glucosamine-6-phosphate deaminase activity`GO:0016787^molecular_function^hydrolase activity`GO:0005975^biological_process^carbohydrate metabolic process`GO:0006044^biological_process^N-acetylglucosamine metabolic process	.
comp11364_c0_seq1	-0.388775	-1.28882	1	1	1.58496	4	2	2.80735	comp11364_c0	.	.	.	.	.	.	.	.	.	.	.
comp11365_c0_seq1	-1.18303	-0.398268	0.567771	1	3.70044	4.08746	3.32193	4.16993	comp11365_c0	.	.	.	.	.	.	.	.	.	.	.
comp11367_c0_seq1	1.65575	-0.139244	0.478754	1	1.58496	4.64386	4.08746	4.90689	comp11367_c0	.	.	.	.	.	.	.	.	.	.	.
comp11368_c0_seq1	0.38793	1.21211	0.872968	1	4.70044	6.08746	5.90689	5.49185	comp11368_c0	.	.	m.4640	127-432[-]	.	.	.	.	.	.
comp11369_c0_seq1	3.1586	-1.11515	0.183128	1	0	4	4.08746	0	comp11369_c0	.	.	.	.	.	.	.	.	.	.	.
comp11370_c0_seq1	1.37852	-0.687696	0.552259	1	1.58496	4.24793	3.80735	3.70044	comp11370_c0	sp|P51523|ZNF84_HUMAN^P51523^Q:364-239,H:672-713^40.4762%ID^E:-2.81^RecName: Full=Zinc finger protein 84;^Eukaryota; Metazoa; Chordata; Craniata; Vertebrata; Euteleostomi; Mammalia; Eutheria; Euarchontoglires; Primates; Haplorrhini; Catarrhini; Hominidae; Homo	.	.	.	.	.	.	.	COG5048^FOG: Zn-finger	GO:0005634^cellular_component^nucleus`GO:0003677^molecular_function^DNA binding`GO:0046872^molecular_function^metal ion binding`GO:0008270^molecular_function^zinc ion binding`GO:0006355^biological_process^regulation of transcription, DNA-dependent`GO:0006351^biological_process^transcription, DNA-dependent	.
comp11371_c0_seq1	-1.78504	-1.16328	0.473474	1	3.32193	3.90689	2.32193	1	comp11371_c0	.	.	.	.	.	.	.	.	.	.	.
comp11372_c0_seq1	1.14729	-1.54772	0.762987	1	1	3	3	2.32193	comp11372_c0	.	.	.	.	.	.	.	.	.	.	.
comp11373_c0_seq1	6.12865	-0.808947	0.152824	1	-Inf	4.16993	3.45943	4	comp11373_c0	.	.	.	.	.	.	.	.	.	.	.
comp11374_c0_seq1	0.81696	0.84267	0.707408	1	4.16993	5.58496	5.80735	4.90689	comp11374_c0	.	.	.	.	.	.	.	.	.	.	.
comp11375_c0_seq1	-1.10874	-1.65768	0.678209	1	2.32193	2.32193	2	2.58496	comp11375_c0	.	.	.	.	.	.	.	.	.	.	.
comp11378_c0_seq1	0.088582	-0.517011	1	1	3	4.64386	3.90689	3	comp11378_c0	.	.	.	.	.	.	.	.	.	.	.
comp11379_c0_seq1	-2.82232	4.46592	0.0994827	1	9.47371	9.04985	7.46761	7.45121	comp11379_c0	sp|O35660|GSTM6_MOUSE^O35660^Q:249-151,H:89-121^51.5152%ID^E:-19.3273^RecName: Full=Glutathione S-transferase Mu 6;^Eukaryota; Metazoa; Chordata; Craniata; Vertebrata; Euteleostomi; Mammalia; Eutheria; Euarchontoglires; Glires; Rodentia; Sciurognathi; Muroidea; Muridae; Murinae; Mus; Mus	.	.	.	.	.	.	.	NOG05174^Glutathione S-transferase	GO:0005737^cellular_component^cytoplasm`GO:0004364^molecular_function^glutathione transferase activity	.
comp11380_c0_seq1	-0.32529	-1.1825	0.907005	1	2.32193	4.24793	2.80735	1	comp11380_c0	sp|Q8T8R1|Y3800_DROME^Q8T8R1^Q:111-209,H:56-90^54.2857%ID^E:-3.04^RecName: Full=CCHC-type zinc finger protein CG3800;^Eukaryota; Metazoa; Ecdysozoa; Arthropoda; Hexapoda; Insecta; Pterygota; Neoptera; Endopterygota; Diptera; Brachycera; Muscomorpha; Ephydroidea; Drosophilidae; Drosophila; Sophophora	.	.	.	.	.	.	.	COG5082^Arginine methyltransferase-interacting protein, contains RING Zn-finger	GO:0046872^molecular_function^metal ion binding`GO:0003676^molecular_function^nucleic acid binding`GO:0008270^molecular_function^zinc ion binding	.
comp11382_c0_seq1	0.394675	-1.15282	1	1	1.58496	3.70044	2.80735	3.32193	comp11382_c0	.	.	.	.	.	.	.	.	.	.	.
comp11383_c0_seq1	-0.0779528	-1.96566	1	1	1.58496	2.32193	2.32193	1	comp11383_c0	.	.	.	.	.	.	.	.	.	.	.
comp11384_c0_seq1	-0.226806	-1.51181	1	1	2	2.32193	2.58496	3	comp11384_c0	.	.	.	.	.	.	.	.	.	.	.
comp11385_c0_seq1	0.0562995	-1.13302	1	1	2.58496	2.80735	3.45943	3	comp11385_c0	.	.	.	.	.	.	.	.	.	.	.
comp11386_c0_seq1	0.410695	4.92171	0.792355	1	8.48784	9.81057	9.71596	9.18488	comp11386_c0	sp|A4FUZ5|SERC3_BOVIN^A4FUZ5^Q:2-175,H:415-472^87.931%ID^E:-24.24^RecName: Full=Serine incorporator 3;^Eukaryota; Metazoa; Chordata; Craniata; Vertebrata; Euteleostomi; Mammalia; Eutheria; Laurasiatheria; Cetartiodactyla; Ruminantia; Pecora; Bovidae; Bovinae; Bos	.	.	.	.	.	.	.	.	GO:0000139^cellular_component^Golgi membrane`GO:0016021^cellular_component^integral to membrane`GO:0005886^cellular_component^plasma membrane`GO:0006917^biological_process^induction of apoptosis	.
comp11387_c0_seq1	1.37852	-0.908508	0.552046	1	1.58496	4.08746	3.80735	2.80735	comp11387_c0	.	.	.	.	.	.	.	.	.	.	.
[truncated: 92,128 more rows]
