# Supplementary material for: A Conserved MicroRNA Regulatory Circuit Is Differentially Controlled during Limb/Appendage Regeneration
Source: PLoS One. 2016 Jun 29;11(6):e0157106. doi: 10.1371/journal.pone.0157106 (PMC4927183; doi:10.1371/journal.pone.0157106)
Supplement: S14 Table — Identifiers of zebrafish protein-coding genes and transcriptome assembly contig identifiers of predicted orthologs. The log2 fold-change of the axolotl transcript is also shown. (XLSX) [file pone.0157106.s018.xlsx]

## Sheet: 10-21-2015_Supplemental_Table_7
S14 Table: Relationships between zebrafish protein-coding genes and assembled transcriptome sequences from axolotl.
Zebrafish Ensembl GeneID	Axolotl TranscriptID	Axolotl Fold Change
ENSDARG00000096118	comp10032_c0_seq1	0.451785
ENSDARG00000078512	comp10072_c0_seq1	-1.79413
ENSDARG00000011648	comp10125_c0_seq1	0.0922722
ENSDARG00000014571	comp10143_c0_seq1	0.911499
ENSDARG00000014571	comp10143_c0_seq1	0.911499
ENSDARG00000092170	comp10155_c0_seq1	1.26039
ENSDARG00000077270	comp10165_c1_seq1	2.25791
ENSDARG00000054155	comp10169_c0_seq1	0.929692
ENSDARG00000017624	comp10170_c0_seq1	-1.15077
ENSDARG00000016300	comp10205_c0_seq1	-2.34201
ENSDARG00000091076	comp10211_c0_seq1	-9.49017
ENSDARG00000086768	comp10239_c0_seq1	0.868414
ENSDARG00000022315	comp10257_c0_seq1	1.67276
ENSDARG00000074625	comp10258_c0_seq1	-2.6289
ENSDARG00000015252	comp10277_c0_seq1	0.34565
ENSDARG00000005526	comp1028_c0_seq1	-5.0692
ENSDARG00000086201	comp10296_c0_seq1	-1.63447
ENSDARG00000056713	comp10300_c0_seq1	2.25293
ENSDARG00000063040	comp10308_c0_seq1	0.1621
ENSDARG00000058372	comp10355_c0_seq2	3.44648
ENSDARG00000090265	comp10393_c0_seq1	-0.228632
ENSDARG00000039347	comp10472_c0_seq1	-0.449812
ENSDARG00000042049	comp10479_c0_seq1	1.46908
ENSDARG00000042049	comp10479_c0_seq1	1.46908
ENSDARG00000053457	comp10485_c0_seq1	-0.629377
ENSDARG00000059874	comp10487_c0_seq1	-0.447959
ENSDARG00000020850	comp10496_c0_seq1	-1.16571
ENSDARG00000036773	comp10517_c0_seq1	-1.09017
ENSDARG00000007960	comp10518_c0_seq1	2.37265
ENSDARG00000007960	comp10518_c0_seq2	1.05253
ENSDARG00000041619	comp10530_c0_seq1	-1.37637
ENSDARG00000030585	comp10534_c0_seq1	-1.01275
ENSDARG00000089797	comp10536_c0_seq1	-0.136668
ENSDARG00000070849	comp10544_c0_seq1	-1.09823
ENSDARG00000041182	comp10548_c0_seq1	-0.766733
ENSDARG00000005551	comp10554_c0_seq2	0.33883
ENSDARG00000014147	comp10561_c0_seq2	1.42548
ENSDARG00000053365	comp10570_c0_seq1	-0.83868
ENSDARG00000029358	comp10575_c0_seq1	0.482752
ENSDARG00000007320	comp10596_c0_seq1	-0.610864
ENSDARG00000074625	comp10607_c0_seq1	-1.98353
ENSDARG00000070903	comp10609_c0_seq1	2.25293
ENSDARG00000043371	comp10612_c0_seq1	-1.81797
ENSDARG00000086201	comp10614_c0_seq1	-0.0708814
ENSDARG00000068910	comp10631_c0_seq1	-1.36749
ENSDARG00000063905	comp10651_c1_seq1	-0.64776
ENSDARG00000020153	comp10657_c0_seq1	-0.456986
ENSDARG00000088030	comp10658_c0_seq1	-0.919039
ENSDARG00000030408	comp10674_c0_seq1	-1.00345
ENSDARG00000077516	comp10687_c0_seq1	1.68391
ENSDARG00000040251	comp10695_c0_seq1	5.66176
ENSDARG00000003599	comp10699_c0_seq1	-1.16932
ENSDARG00000023330	comp10707_c0_seq1	0.473431
ENSDARG00000045352	comp10712_c0_seq1	1.10833
ENSDARG00000071403	comp10715_c0_seq1	0.00459336
ENSDARG00000015128	comp10725_c0_seq1	-0.722243
ENSDARG00000090493	comp10731_c0_seq1	-0.584043
ENSDARG00000037968	comp10741_c0_seq1	1.32217
ENSDARG00000037968	comp10741_c0_seq1	1.32217
ENSDARG00000014690	comp10744_c0_seq1	-0.822361
ENSDARG00000006316	comp10745_c0_seq1	-1.21734
ENSDARG00000045367	comp10759_c0_seq1	0.0939304
ENSDARG00000070019	comp10784_c0_seq1	0.931452
ENSDARG00000070019	comp10784_c0_seq1	0.931452
ENSDARG00000016239	comp10798_c0_seq1	0.0938018
ENSDARG00000036715	comp10803_c0_seq1	0.213743
ENSDARG00000090493	comp10809_c0_seq1	-0.7705
ENSDARG00000076526	comp10823_c0_seq1	0.169364
ENSDARG00000010434	comp10827_c0_seq1	0.679762
ENSDARG00000045399	comp1083_c0_seq1	0.754394
ENSDARG00000090493	comp1084_c0_seq1	-1.36749
ENSDARG00000077732	comp10848_c0_seq2	0.394527
ENSDARG00000097209	comp10857_c0_seq1	-2.25767
ENSDARG00000021866	comp10867_c0_seq1	-8.71715
ENSDARG00000003085	comp10884_c0_seq1	-0.526764
ENSDARG00000042969	comp10891_c0_seq1	-0.283666
ENSDARG00000089082	comp10902_c0_seq1	-0.614747
ENSDARG00000033144	comp10903_c0_seq1	-0.41496
ENSDARG00000070674	comp10923_c0_seq1	0.782972
ENSDARG00000042899	comp10928_c0_seq1	-1.22508
ENSDARG00000078073	comp10947_c0_seq1	0.171423
ENSDARG00000015538	comp10948_c0_seq2	0.952183
ENSDARG00000040046	comp10954_c0_seq1	1.55306
ENSDARG00000086075	comp10956_c0_seq1	-0.228632
ENSDARG00000063731	comp10967_c0_seq1	1.30295
ENSDARG00000090493	comp10981_c0_seq1	-0.542336
ENSDARG00000015566	comp10984_c0_seq1	1.11407
ENSDARG00000034894	comp10988_c0_seq1	1.07253
ENSDARG00000092124	comp11002_c0_seq1	-1.12399
ENSDARG00000086495	comp11022_c0_seq1	-0.32529
ENSDARG00000018890	comp11028_c0_seq1	0.754207
ENSDARG00000006019	comp11081_c0_seq1	-7.99502
ENSDARG00000010773	comp11095_c0_seq1	-1.18993
ENSDARG00000037371	comp11100_c0_seq1	0.403287
ENSDARG00000087439	comp11104_c0_seq1	2.08614
ENSDARG00000006200	comp11106_c0_seq1	1.12828
ENSDARG00000043448	comp11118_c0_seq1	-8.51414
ENSDARG00000061600	comp11144_c0_seq1	0.958666
ENSDARG00000045676	comp11151_c0_seq1	0.201606
ENSDARG00000005191	comp11157_c0_seq1	-6.77558
ENSDARG00000046157	comp11172_c0_seq1	-1.29701
ENSDARG00000036773	comp11175_c0_seq1	-0.111245
ENSDARG00000086511	comp11193_c0_seq1	-3.16578
ENSDARG00000076934	comp11241_c0_seq1	0.762276
ENSDARG00000016936	comp11244_c0_seq1	0.175216
ENSDARG00000086201	comp11247_c0_seq1	-2.05446
ENSDARG00000046004	comp11253_c0_seq1	-0.267001
ENSDARG00000046004	comp11253_c0_seq2	-4.39765
ENSDARG00000008292	comp11276_c0_seq1	-0.38578
ENSDARG00000009285	comp11285_c0_seq1	-1.06846
ENSDARG00000009285	comp11285_c0_seq1	-1.06846
ENSDARG00000063385	comp11319_c0_seq1	2.75183
ENSDARG00000036298	comp11334_c0_seq1	-0.508024
ENSDARG00000090265	comp11338_c0_seq1	-0.488811
ENSDARG00000091699	comp11339_c0_seq2	4.30815
ENSDARG00000037307	comp11363_c0_seq1	0.958666
ENSDARG00000019838	comp11425_c0_seq1	1.66573
ENSDARG00000042876	comp11430_c0_seq1	1.44252
ENSDARG00000012135	comp1146_c0_seq2	-1.98353
ENSDARG00000056531	comp11460_c0_seq1	0.146305
ENSDARG00000078447	comp11493_c0_seq1	0.500767
ENSDARG00000070844	comp11496_c0_seq1	-3.57507
ENSDARG00000005774	comp11500_c0_seq1	1.65575
ENSDARG00000074332	comp11506_c0_seq1	0.997399
ENSDARG00000018681	comp11513_c0_seq1	0.766375
ENSDARG00000020298	comp11526_c0_seq1	-0.460388
ENSDARG00000071692	comp11537_c0_seq1	-2.31321
ENSDARG00000077383	comp11546_c0_seq1	-8.51414
ENSDARG00000086671	comp11555_c0_seq1	3.31765
ENSDARG00000045519	comp11560_c0_seq1	-0.138388
ENSDARG00000071336	comp11586_c0_seq1	0.180471
ENSDARG00000039007	comp11592_c0_seq1	-3.25475
ENSDARG00000058352	comp11595_c0_seq1	0.921279
ENSDARG00000058352	comp11595_c0_seq2	0.14164
ENSDARG00000042899	comp11599_c0_seq1	-0.736915
ENSDARG00000077242	comp11612_c0_seq1	-0.67986
ENSDARG00000014830	comp11635_c0_seq1	-0.156341
ENSDARG00000006019	comp11636_c0_seq1	-0.20058
ENSDARG00000076624	comp11659_c0_seq1	-2.04364
ENSDARG00000037361	comp11668_c0_seq1	0.0473876
ENSDARG00000078725	comp11683_c0_seq1	0.267367
ENSDARG00000075164	comp11699_c0_seq1	-1.18176
ENSDARG00000000103	comp11706_c0_seq1	0.443423
ENSDARG00000036070	comp11712_c0_seq1	0.0754312
ENSDARG00000005713	comp11723_c0_seq1	-0.287979
ENSDARG00000024748	comp11798_c0_seq1	-0.477602
ENSDARG00000022833	comp11831_c0_seq1	-7.2896
ENSDARG00000076003	comp11835_c0_seq1	2.459
ENSDARG00000034894	comp11843_c0_seq1	2.01071
ENSDARG00000090493	comp11852_c0_seq1	-1.31707
ENSDARG00000061490	comp11853_c0_seq1	-1.31241
ENSDARG00000031302	comp11859_c0_seq1	0.367011
ENSDARG00000071294	comp11864_c0_seq1	1.22267
ENSDARG00000088026	comp11886_c0_seq1	-0.810757
ENSDARG00000086848	comp11896_c0_seq1	0.038669
ENSDARG00000078508	comp11903_c0_seq1	0.912842
ENSDARG00000053129	comp11904_c0_seq2	0.368184
ENSDARG00000019834	comp11913_c0_seq1	-0.32529
ENSDARG00000090265	comp11939_c0_seq1	-0.137954
ENSDARG00000090265	comp11947_c0_seq1	-0.565488
ENSDARG00000002690	comp11948_c0_seq1	0.328078
ENSDARG00000002690	comp11948_c0_seq1	0.328078
ENSDARG00000015490	comp11953_c0_seq1	-12.4115
ENSDARG00000041908	comp11957_c0_seq1	0.311711
ENSDARG00000008243	comp11989_c0_seq1	-9.99077
ENSDARG00000089936	comp11994_c0_seq1	-0.193799
ENSDARG00000089844	comp11999_c0_seq1	0.333728
ENSDARG00000006760	comp12016_c0_seq1	0.34565
ENSDARG00000056535	comp12042_c0_seq1	-0.178949
ENSDARG00000005541	comp12046_c0_seq1	-1.12378
ENSDARG00000090493	comp12055_c0_seq1	-0.212437
ENSDARG00000091076	comp12058_c0_seq1	-9.14078
ENSDARG00000094311	comp12074_c0_seq1	0.175216
ENSDARG00000090493	comp12075_c0_seq1	-0.452474
ENSDARG00000015176	comp12086_c0_seq1	0.836088
ENSDARG00000013489	comp12101_c0_seq1	-0.781342
ENSDARG00000062634	comp12112_c0_seq1	-0.458258
ENSDARG00000017235	comp12127_c0_seq1	-8.79098
ENSDARG00000019532	comp12188_c0_seq1	-1.18993
ENSDARG00000052741	comp12212_c0_seq1	-1.94353
ENSDARG00000076063	comp12218_c0_seq1	-0.0328983
ENSDARG00000071331	comp12249_c0_seq1	-4.02491
ENSDARG00000079730	comp12296_c0_seq1	-0.584043
ENSDARG00000003380	comp12308_c0_seq1	1.01046
ENSDARG00000059784	comp1231_c0_seq1	-3.59079
ENSDARG00000015674	comp12336_c0_seq1	1.49064
ENSDARG00000022045	comp12345_c0_seq1	0.983578
ENSDARG00000013460	comp12365_c0_seq1	0.468155
ENSDARG00000090493	comp12378_c0_seq1	-3.09918
ENSDARG00000060434	comp12387_c0_seq1	3.46089
ENSDARG00000020699	comp12419_c0_seq1	-0.194399
ENSDARG00000069594	comp12428_c0_seq1	0.181754
ENSDARG00000069912	comp12455_c0_seq1	1.04411
ENSDARG00000068256	comp12584_c0_seq1	0.298031
ENSDARG00000077242	comp12614_c0_seq1	-10.037
ENSDARG00000077946	comp12615_c0_seq1	0.180471
ENSDARG00000012002	comp12623_c0_seq1	0.278923
ENSDARG00000069594	comp12636_c0_seq1	0.651333
ENSDARG00000040432	comp12665_c0_seq1	-0.869961
ENSDARG00000053047	comp12696_c0_seq1	0.242415
ENSDARG00000074311	comp12711_c0_seq1	0.258289
ENSDARG00000005058	comp12715_c0_seq1	1.06099
ENSDARG00000079879	comp12745_c0_seq1	0.440032
ENSDARG00000005799	comp12748_c0_seq2	-0.176657
ENSDARG00000063412	comp12764_c0_seq1	-5.19424
ENSDARG00000090697	comp12765_c0_seq2	-7.93115
ENSDARG00000041260	comp12783_c0_seq1	0.908372
ENSDARG00000041260	comp12783_c0_seq1	0.908372
ENSDARG00000016154	comp12784_c0_seq1	0.561143
ENSDARG00000061794	comp12788_c0_seq1	0.30182
ENSDARG00000061794	comp12788_c0_seq1	0.30182
ENSDARG00000078973	comp12798_c0_seq1	-3.78716
ENSDARG00000074245	comp12816_c0_seq1	-0.720304
ENSDARG00000015315	comp12823_c0_seq1	0.389309
ENSDARG00000013763	comp12829_c0_seq1	0.958666
ENSDARG00000062765	comp12845_c0_seq1	0.611121
ENSDARG00000070683	comp12920_c0_seq1	0.432074
ENSDARG00000007760	comp12947_c0_seq1	-0.0749922
ENSDARG00000071211	comp12956_c0_seq1	-0.310141
ENSDARG00000086302	comp12960_c0_seq1	1.24927
ENSDARG00000008413	comp12963_c0_seq1	-0.175117
ENSDARG00000086495	comp12965_c0_seq1	-0.797918
ENSDARG00000036069	comp12979_c0_seq1	-0.112401
ENSDARG00000090493	comp1298_c0_seq1	-0.0779528
ENSDARG00000012467	comp13023_c0_seq1	-6.71426
ENSDARG00000061066	comp13040_c0_seq1	-0.0971772
ENSDARG00000063416	comp13045_c0_seq1	2.77569
ENSDARG00000095890	comp13046_c0_seq1	-1.05667
ENSDARG00000028900	comp13077_c0_seq1	0.401535
ENSDARG00000023330	comp13078_c0_seq1	0.00234532
ENSDARG00000075650	comp13096_c0_seq1	-0.17004
ENSDARG00000086908	comp13122_c0_seq1	1.85965
ENSDARG00000086201	comp13167_c0_seq1	-4.48283
ENSDARG00000007398	comp13172_c0_seq1	-0.230756
ENSDARG00000086495	comp13212_c0_seq1	-0.199375
ENSDARG00000088574	comp13217_c0_seq1	0.198713
ENSDARG00000042003	comp13224_c0_seq1	-4.46593
ENSDARG00000095629	comp13235_c0_seq1	0.486037
ENSDARG00000054696	comp13242_c0_seq1	0.330594
ENSDARG00000006514	comp13248_c0_seq1	0.51297
ENSDARG00000058734	comp13322_c0_seq1	0.764273
ENSDARG00000090014	comp13327_c0_seq1	-6.62822
ENSDARG00000057013	comp13343_c0_seq1	-2.43408
ENSDARG00000056619	comp13345_c0_seq2	1.9803
ENSDARG00000056619	comp13345_c0_seq2	1.9803
ENSDARG00000089863	comp13353_c0_seq1	0.0567128
ENSDARG00000087038	comp13356_c0_seq1	-0.328567
ENSDARG00000053666	comp13359_c0_seq1	-0.0395996
ENSDARG00000089082	comp1336_c0_seq1	-0.221499
ENSDARG00000089797	comp13362_c0_seq1	-0.381864
ENSDARG00000089797	comp13362_c0_seq1	-0.381864
ENSDARG00000054456	comp13364_c0_seq1	-0.464893
ENSDARG00000075172	comp13378_c0_seq1	-1.09332
ENSDARG00000043154	comp13382_c0_seq1	-0.289086
ENSDARG00000045989	comp13385_c0_seq1	1.89752
ENSDARG00000089358	comp13408_c0_seq1	-0.814504
ENSDARG00000071868	comp13423_c0_seq1	-0.0513292
ENSDARG00000092872	comp13431_c0_seq1	-9.11226
ENSDARG00000090493	comp13452_c0_seq1	-1.52945
ENSDARG00000012002	comp13455_c0_seq1	1.44366
ENSDARG00000014626	comp13472_c0_seq1	0.512994
ENSDARG00000014626	comp13472_c0_seq1	0.512994
ENSDARG00000086495	comp13479_c0_seq1	-0.488811
ENSDARG00000043009	comp13488_c0_seq1	-0.513476
ENSDARG00000091766	comp13499_c0_seq1	0.636285
ENSDARG00000070098	comp13507_c0_seq1	7.82476
ENSDARG00000056690	comp13516_c0_seq1	-0.00976039
ENSDARG00000071377	comp13535_c0_seq1	-2.92187
ENSDARG00000037097	comp13554_c0_seq1	-2.39071
ENSDARG00000029766	comp13579_c0_seq1	-0.990311
ENSDARG00000045946	comp136_c0_seq1	0.394675
ENSDARG00000018096	comp13648_c0_seq1	-0.163027
ENSDARG00000035423	comp13668_c0_seq1	1.39705
ENSDARG00000062765	comp13687_c0_seq1	1.47697
ENSDARG00000000760	comp13733_c0_seq1	1.15883
ENSDARG00000075536	comp13782_c0_seq1	0.268068
ENSDARG00000075536	comp13782_c0_seq2	0.465803
ENSDARG00000061265	comp13823_c0_seq1	2.66167
ENSDARG00000042728	comp13824_c0_seq1	0.547794
ENSDARG00000006397	comp13832_c0_seq1	-9.08316
ENSDARG00000030394	comp13855_c0_seq1	-1.59192
ENSDARG00000036629	comp13901_c0_seq1	-8.83552
ENSDARG00000038068	comp13903_c0_seq1	0.737757
ENSDARG00000071331	comp13944_c0_seq1	-4.85031
ENSDARG00000069473	comp13946_c0_seq1	2.93436
ENSDARG00000062402	comp13952_c0_seq1	2.30146
ENSDARG00000090493	comp13954_c0_seq1	-1.09332
ENSDARG00000040930	comp13959_c0_seq1	-2.04159
ENSDARG00000004176	comp13969_c0_seq1	0.690161
ENSDARG00000041811	comp13985_c0_seq1	-8.80166
ENSDARG00000062109	comp13986_c0_seq1	0.278923
ENSDARG00000039684	comp13988_c0_seq1	-0.786305
ENSDARG00000055240	comp14021_c0_seq1	-1.31241
ENSDARG00000090493	comp14038_c0_seq1	-0.0791436
ENSDARG00000040128	comp14087_c0_seq1	1.46356
ENSDARG00000087554	comp14101_c0_seq1	2.54892
ENSDARG00000020679	comp14103_c0_seq2	4.70486
ENSDARG00000074332	comp14112_c0_seq1	0.231905
ENSDARG00000045372	comp14131_c0_seq1	-0.139192
ENSDARG00000045372	comp14131_c0_seq2	-1.15312
ENSDARG00000062579	comp14132_c0_seq1	1.36146
ENSDARG00000003570	comp14135_c0_seq1	0.592126
ENSDARG00000027088	comp14155_c0_seq1	-1.33628
ENSDARG00000037060	comp14164_c0_seq1	-0.711839
ENSDARG00000046157	comp14201_c0_seq1	-11.1389
ENSDARG00000086495	comp14231_c0_seq1	-0.388775
ENSDARG00000018534	comp14273_c0_seq1	-0.0513292
ENSDARG00000074242	comp14281_c0_seq1	-11.2146
ENSDARG00000061272	comp14307_c0_seq2	0.750086
ENSDARG00000059826	comp14352_c0_seq1	-2.23218
ENSDARG00000055216	comp14364_c0_seq1	0.731925
ENSDARG00000026198	comp14377_c0_seq1	0.398263
ENSDARG00000062913	comp14388_c0_seq1	-9.14078
ENSDARG00000088915	comp14413_c0_seq1	-0.0392153
ENSDARG00000045705	comp14424_c0_seq1	3.07197
ENSDARG00000086495	comp14429_c0_seq1	-0.163027
ENSDARG00000056517	comp14441_c0_seq1	0.068777
ENSDARG00000087038	comp14468_c0_seq1	-5.3093
ENSDARG00000029011	comp14473_c0_seq1	-0.2012
ENSDARG00000089797	comp14481_c0_seq1	-0.542336
ENSDARG00000003938	comp14484_c0_seq1	0.866993
ENSDARG00000007678	comp14490_c0_seq1	1.14729
ENSDARG00000053685	comp14503_c0_seq1	0.238981
ENSDARG00000053685	comp14503_c0_seq2	0.12594
ENSDARG00000002607	comp14513_c0_seq1	2.2446
ENSDARG00000026400	comp14515_c0_seq1	1.94251
ENSDARG00000062632	comp1456_c0_seq2	6.83111
ENSDARG00000013252	comp14573_c0_seq1	-0.395421
ENSDARG00000007412	comp14575_c0_seq1	-0.221499
ENSDARG00000030530	comp14579_c0_seq1	-3.56516
ENSDARG00000090493	comp14581_c0_seq1	-1.76421
ENSDARG00000044540	comp14596_c0_seq1	0.201353
ENSDARG00000061248	comp14618_c0_seq1	0.278923
ENSDARG00000058105	comp14634_c0_seq1	-6.10654
ENSDARG00000086201	comp14652_c0_seq1	-0.00976039
ENSDARG00000045519	comp14662_c0_seq1	-0.203198
ENSDARG00000040582	comp14667_c0_seq1	-0.801089
ENSDARG00000074242	comp14670_c0_seq1	-0.0328983
ENSDARG00000056099	comp14680_c0_seq1	0.864196
ENSDARG00000056099	comp14680_c0_seq2	0.245607
ENSDARG00000046119	comp14681_c0_seq1	-12.8497
ENSDARG00000088248	comp14682_c0_seq1	-0.00992566
ENSDARG00000086495	comp14685_c0_seq1	-0.801089
ENSDARG00000014047	comp14718_c0_seq1	-9.37486
ENSDARG00000090449	comp14722_c0_seq1	-0.885792
ENSDARG00000074695	comp14788_c0_seq1	0.761686
ENSDARG00000007125	comp14795_c0_seq1	7.30149
ENSDARG00000087007	comp14827_c0_seq1	1.2823
ENSDARG00000016903	comp14829_c0_seq1	0.337491
ENSDARG00000063412	comp14830_c0_seq1	-2.97934
ENSDARG00000090945	comp14837_c0_seq1	-1.276
ENSDARG00000031795	comp14839_c0_seq1	0.772696
ENSDARG00000018383	comp14845_c0_seq1	-0.565488
ENSDARG00000086495	comp14867_c0_seq1	-0.395421
ENSDARG00000063149	comp14875_c0_seq1	-0.0286033
ENSDARG00000078391	comp14880_c0_seq1	0.879288
ENSDARG00000097057	comp14888_c0_seq1	-0.666575
ENSDARG00000077375	comp14913_c0_seq1	2.41554
ENSDARG00000060496	comp1493_c0_seq1	6.5706
ENSDARG00000021864	comp14931_c0_seq1	-13.064
ENSDARG00000015566	comp14936_c0_seq1	2.05051
ENSDARG00000018534	comp14955_c0_seq1	-0.512915
ENSDARG00000090493	comp14959_c0_seq1	-0.221499
ENSDARG00000045180	comp14972_c0_seq1	-5.59348
ENSDARG00000061021	comp15006_c0_seq1	-0.153153
ENSDARG00000069311	comp15040_c0_seq1	-1.62764
ENSDARG00000056467	comp15044_c0_seq1	-0.606006
ENSDARG00000056467	comp15044_c0_seq1	-0.606006
ENSDARG00000008184	comp15047_c0_seq1	1.75744
ENSDARG00000090493	comp15054_c0_seq1	-1.37889
ENSDARG00000031588	comp15060_c0_seq1	-0.728847
ENSDARG00000001940	comp15068_c0_seq1	0.436482
ENSDARG00000060316	comp15074_c0_seq1	-0.789742
ENSDARG00000034885	comp15076_c0_seq2	0.347991
ENSDARG00000006052	comp15088_c0_seq1	-0.00976039
ENSDARG00000009499	comp15092_c0_seq1	0.899575
ENSDARG00000042635	comp15104_c0_seq1	0.510001
ENSDARG00000002082	comp15107_c0_seq1	0.316422
ENSDARG00000005416	comp15117_c0_seq1	-1.8711
ENSDARG00000005791	comp15128_c0_seq1	-11.5643
ENSDARG00000060860	comp15146_c0_seq1	-0.492088
ENSDARG00000025375	comp15168_c0_seq1	0.659529
ENSDARG00000061481	comp1517_c0_seq1	5.01568
ENSDARG00000051827	comp15202_c0_seq1	-1.34734
ENSDARG00000091766	comp15206_c0_seq1	1.03502
ENSDARG00000057782	comp15208_c0_seq1	0.0752738
ENSDARG00000057782	comp15208_c0_seq2	5.01568
ENSDARG00000035810	comp15229_c0_seq1	-4.37332
ENSDARG00000035810	comp15229_c0_seq2	-0.29847
ENSDARG00000061504	comp15234_c0_seq1	-1.29887
ENSDARG00000020876	comp15257_c0_seq1	-2.68299
ENSDARG00000058451	comp15259_c0_seq1	-0.627289
ENSDARG00000045567	comp15261_c0_seq1	1.07565
ENSDARG00000014159	comp15263_c0_seq1	1.45073
ENSDARG00000063288	comp15266_c0_seq1	-0.648381
ENSDARG00000058105	comp15275_c0_seq1	-0.749651
ENSDARG00000040005	comp15276_c0_seq1	5.48831
ENSDARG00000019924	comp15282_c0_seq1	0.470389
ENSDARG00000043531	comp15286_c0_seq1	-0.0857498
ENSDARG00000034957	comp15287_c0_seq1	0.0736106
ENSDARG00000031511	comp15302_c0_seq1	0.350302
ENSDARG00000058561	comp15305_c0_seq1	0.510381
ENSDARG00000014690	comp15313_c0_seq1	-8.09953
ENSDARG00000046024	comp15314_c0_seq2	-1.09299
ENSDARG00000008188	comp15316_c0_seq2	0.207693
ENSDARG00000006413	comp15320_c0_seq1	-0.408437
ENSDARG00000024746	comp15345_c0_seq1	-9.44962
ENSDARG00000036966	comp15354_c0_seq1	-1.05831
ENSDARG00000040678	comp15355_c0_seq1	0.191474
ENSDARG00000019253	comp15357_c0_seq1	-2.13402
ENSDARG00000031873	comp15358_c0_seq1	-0.383295
ENSDARG00000017397	comp15365_c0_seq1	1.22584
ENSDARG00000010021	comp15366_c0_seq1	0.640065
ENSDARG00000060520	comp15373_c0_seq1	0.847996
ENSDARG00000060520	comp15373_c0_seq1	0.847996
ENSDARG00000016188	comp15381_c0_seq1	2.05055
ENSDARG00000017803	comp15385_c0_seq1	7.82476
ENSDARG00000017803	comp15385_c0_seq3	8.14541
ENSDARG00000017803	comp15385_c0_seq4	1.70756
ENSDARG00000037958	comp15386_c0_seq1	-0.273078
ENSDARG00000077505	comp15390_c0_seq1	-5.23363
ENSDARG00000076965	comp15396_c0_seq1	0.614242
ENSDARG00000062450	comp15397_c0_seq1	-0.238852
ENSDARG00000094894	comp15405_c0_seq1	1.47425
ENSDARG00000018889	comp15414_c0_seq1	0.783856
ENSDARG00000058480	comp15417_c0_seq1	0.510381
ENSDARG00000040021	comp15422_c0_seq1	-0.382781
ENSDARG00000040021	comp15422_c0_seq1	-0.382781
ENSDARG00000011125	comp15423_c0_seq1	0.32509
ENSDARG00000005791	comp15427_c0_seq1	-0.449418
ENSDARG00000001950	comp15430_c0_seq1	-5.99152
ENSDARG00000074502	comp15431_c0_seq1	0.654445
ENSDARG00000074502	comp15431_c0_seq2	1.0098
ENSDARG00000074502	comp15431_c0_seq3	6.47215
ENSDARG00000037038	comp15436_c0_seq1	0.298232
ENSDARG00000037038	comp15436_c0_seq1	0.298232
ENSDARG00000056258	comp15437_c0_seq1	0.946304
ENSDARG00000056258	comp15437_c0_seq2	0.260067
ENSDARG00000015208	comp15439_c0_seq1	0.925139
ENSDARG00000074556	comp1544_c0_seq1	-0.542336
ENSDARG00000006567	comp15440_c0_seq1	0.532986
ENSDARG00000036613	comp15453_c0_seq1	-0.96542
ENSDARG00000073786	comp15456_c0_seq1	-1.96178
ENSDARG00000073786	comp15456_c0_seq2	-0.420594
ENSDARG00000057368	comp15462_c0_seq1	-6.08848
ENSDARG00000062096	comp15468_c0_seq2	-0.37207
ENSDARG00000052103	comp15474_c0_seq1	0.189678
ENSDARG00000043361	comp15477_c0_seq2	-0.558197
ENSDARG00000036102	comp15481_c0_seq1	-0.414362
ENSDARG00000070437	comp15487_c0_seq1	-8.75405
ENSDARG00000055620	comp15490_c0_seq1	0.0100214
ENSDARG00000005891	comp15491_c0_seq1	-0.153934
ENSDARG00000022232	comp15494_c0_seq2	1.02868
ENSDARG00000038609	comp15508_c0_seq1	-5.37373
ENSDARG00000038609	comp15508_c0_seq1	-5.37373
ENSDARG00000038609	comp15508_c0_seq1	-5.37373
ENSDARG00000040440	comp15512_c0_seq1	0.551564
ENSDARG00000028327	comp15517_c0_seq1	0.0319648
ENSDARG00000028327	comp15517_c0_seq2	0.442684
ENSDARG00000063625	comp15520_c0_seq2	-0.616683
ENSDARG00000011196	comp15526_c0_seq1	0.700678
ENSDARG00000021864	comp15542_c0_seq1	-1.26011
ENSDARG00000005842	comp15543_c0_seq1	-0.512766
ENSDARG00000027357	comp15550_c0_seq1	0.315052
ENSDARG00000036875	comp15561_c0_seq1	-1.15456
ENSDARG00000063383	comp15565_c0_seq1	0.453607
ENSDARG00000052664	comp15570_c0_seq2	0.22516
ENSDARG00000061226	comp15572_c0_seq1	1.24904
ENSDARG00000042247	comp15576_c0_seq1	-1.04615
ENSDARG00000007241	comp15578_c0_seq1	-0.243203
ENSDARG00000001285	comp15594_c0_seq1	1.79491
ENSDARG00000045015	comp15601_c0_seq1	7.72979
ENSDARG00000078352	comp15611_c0_seq1	-1.15778
ENSDARG00000021812	comp15614_c0_seq1	0.704179
ENSDARG00000045611	comp15622_c0_seq1	-0.307677
ENSDARG00000078293	comp15626_c0_seq1	-2.15331
ENSDARG00000079639	comp15627_c0_seq1	0.576964
ENSDARG00000003032	comp15628_c0_seq1	-0.274938
ENSDARG00000031216	comp15631_c0_seq1	0.990619
ENSDARG00000011201	comp15632_c0_seq1	-0.630406
ENSDARG00000070834	comp15633_c0_seq1	1.17688
ENSDARG00000070834	comp15633_c0_seq2	0.543283
ENSDARG00000012495	comp15636_c0_seq1	1.91605
ENSDARG00000011127	comp15640_c0_seq1	9.22073
ENSDARG00000011127	comp15640_c0_seq2	0.446342
ENSDARG00000058480	comp15641_c0_seq1	0.939847
ENSDARG00000061737	comp15643_c0_seq1	0.142975
ENSDARG00000061737	comp15643_c0_seq2	0.805875
ENSDARG00000007885	comp15650_c0_seq2	0.510125
ENSDARG00000007885	comp15650_c0_seq2	0.510125
ENSDARG00000071159	comp15656_c0_seq1	-0.807166
ENSDARG00000008020	comp15658_c0_seq2	-0.627056
ENSDARG00000004189	comp15660_c0_seq1	1.51402
ENSDARG00000032619	comp15663_c0_seq1	-0.209799
ENSDARG00000032619	comp15663_c0_seq2	-0.659056
ENSDARG00000005333	comp15670_c0_seq1	0.318097
ENSDARG00000069289	comp15679_c0_seq1	0.893022
ENSDARG00000030694	comp15682_c0_seq1	1.1287
ENSDARG00000023963	comp15688_c0_seq3	0.442889
ENSDARG00000060471	comp15712_c0_seq1	-0.831475
ENSDARG00000058570	comp15727_c0_seq1	-1.50264
ENSDARG00000052747	comp15729_c0_seq1	-8.82653
ENSDARG00000052747	comp15729_c0_seq2	-0.954904
ENSDARG00000008380	comp15733_c0_seq1	0.813122
ENSDARG00000014041	comp15740_c0_seq1	0.864407
ENSDARG00000062650	comp15742_c0_seq1	1.31682
ENSDARG00000025875	comp15751_c0_seq1	-0.404528
ENSDARG00000044521	comp15755_c0_seq1	-0.830851
ENSDARG00000053058	comp15772_c0_seq1	-0.280816
ENSDARG00000019778	comp15791_c0_seq1	-1.0142
ENSDARG00000004757	comp15793_c0_seq1	-1.35007
ENSDARG00000011055	comp15798_c0_seq2	-0.159514
ENSDARG00000056914	comp15799_c0_seq1	0.558752
ENSDARG00000020708	comp15808_c0_seq1	2.3081
ENSDARG00000024030	comp15814_c0_seq1	3.37719
ENSDARG00000044484	comp15828_c0_seq2	0.454373
ENSDARG00000004436	comp15836_c0_seq1	0.0662564
ENSDARG00000059760	comp15837_c0_seq1	-3.59079
ENSDARG00000059760	comp15837_c0_seq2	-0.287078
ENSDARG00000046119	comp15841_c0_seq1	-12.0735
ENSDARG00000063535	comp15842_c0_seq1	1.16083
ENSDARG00000077070	comp15848_c0_seq1	0.564436
ENSDARG00000006413	comp15851_c0_seq1	-11.3551
ENSDARG00000011961	comp15856_c0_seq1	-1.66291
ENSDARG00000051785	comp15858_c0_seq1	0.602048
ENSDARG00000035692	comp15865_c0_seq1	-0.835577
ENSDARG00000052336	comp15871_c0_seq1	-0.701054
ENSDARG00000018434	comp15873_c0_seq1	9.20549
ENSDARG00000018434	comp15873_c0_seq1	9.20549
ENSDARG00000018434	comp15873_c0_seq2	0.501789
ENSDARG00000018434	comp15873_c0_seq2	0.501789
ENSDARG00000054058	comp15875_c0_seq1	-1.25312
ENSDARG00000054058	comp15875_c0_seq2	-12.3609
ENSDARG00000068365	comp15877_c0_seq1	-0.37351
ENSDARG00000068365	comp15877_c0_seq1	-0.37351
ENSDARG00000057727	comp15882_c0_seq1	1.06678
ENSDARG00000057273	comp15886_c0_seq1	-2.22903
ENSDARG00000046157	comp15887_c0_seq1	-11.7562
ENSDARG00000090113	comp15894_c0_seq1	2.20015
ENSDARG00000014690	comp15895_c0_seq1	-10.8589
ENSDARG00000052082	comp15908_c0_seq1	-0.359331
ENSDARG00000052082	comp15908_c0_seq1	-0.359331
ENSDARG00000040374	comp15909_c0_seq1	-5.50713
ENSDARG00000059707	comp15927_c0_seq1	6.74939
ENSDARG00000041182	comp15934_c0_seq1	-0.181182
ENSDARG00000013741	comp15938_c0_seq1	-2.97476
ENSDARG00000013741	comp15938_c0_seq2	-1.20074
ENSDARG00000044492	comp15940_c0_seq1	1.34081
ENSDARG00000053510	comp15944_c0_seq1	-1.82544
ENSDARG00000071498	comp15949_c0_seq1	-4.73584
ENSDARG00000045487	comp15961_c0_seq1	-8.1121
ENSDARG00000038422	comp15977_c0_seq1	0.383284
ENSDARG00000060041	comp15985_c0_seq1	0.88999
ENSDARG00000074641	comp15987_c0_seq1	-0.667377
ENSDARG00000079628	comp15994_c0_seq1	-0.970193
ENSDARG00000079628	comp15994_c0_seq3	-0.647289
ENSDARG00000075340	comp15997_c0_seq1	0.516851
ENSDARG00000086201	comp15998_c0_seq1	-1.18093
ENSDARG00000086201	comp15998_c0_seq1	-1.18093
ENSDARG00000038066	comp15999_c0_seq1	2.10243
ENSDARG00000025073	comp16002_c0_seq1	-7.98032
ENSDARG00000025073	comp16002_c0_seq1	-7.98032
ENSDARG00000087780	comp16014_c0_seq1	0.999354
ENSDARG00000076010	comp16019_c0_seq1	8.55918
ENSDARG00000042997	comp16026_c0_seq1	-0.393893
ENSDARG00000056886	comp16041_c0_seq1	0.581323
ENSDARG00000015111	comp16044_c0_seq1	1.10739
ENSDARG00000080010	comp16046_c0_seq1	-4.47559
ENSDARG00000042623	comp16047_c0_seq1	0.621467
ENSDARG00000008407	comp16055_c0_seq1	-1.61357
ENSDARG00000073910	comp16056_c0_seq1	0.233011
ENSDARG00000043848	comp16081_c0_seq1	-0.508094
ENSDARG00000052555	comp16086_c0_seq1	0.447668
ENSDARG00000011662	comp16092_c0_seq1	-0.164517
ENSDARG00000018973	comp16093_c0_seq1	0.933665
ENSDARG00000039343	comp16107_c0_seq1	0.885587
ENSDARG00000044083	comp16112_c0_seq1	0.776861
ENSDARG00000044083	comp16112_c0_seq1	0.776861
ENSDARG00000025972	comp16113_c0_seq1	0.329573
ENSDARG00000015392	comp16114_c0_seq1	2.00511
ENSDARG00000015392	comp16114_c0_seq2	0.814754
ENSDARG00000036987	comp16122_c0_seq1	2.15474
ENSDARG00000071567	comp16124_c0_seq1	0.822692
ENSDARG00000091076	comp16128_c0_seq1	-2.05893
ENSDARG00000018325	comp16129_c0_seq1	0.579494
ENSDARG00000045928	comp16149_c0_seq1	0.384248
ENSDARG00000090586	comp16154_c0_seq1	2.40014
ENSDARG00000005078	comp16160_c0_seq1	0.958524
ENSDARG00000017500	comp16165_c0_seq1	0.133558
ENSDARG00000086699	comp16171_c0_seq1	0.712434
ENSDARG00000060534	comp16175_c0_seq1	1.22072
ENSDARG00000000542	comp16177_c0_seq1	1.33342
ENSDARG00000037371	comp16180_c0_seq1	1.2484
ENSDARG00000057006	comp16191_c0_seq1	-1.43881
ENSDARG00000042571	comp16202_c0_seq1	-0.128886
ENSDARG00000026454	comp16208_c0_seq1	1.79248
ENSDARG00000017803	comp16210_c0_seq1	0.146059
ENSDARG00000059725	comp16211_c0_seq1	0.326213
ENSDARG00000061764	comp16213_c0_seq1	-0.336312
ENSDARG00000020204	comp16216_c0_seq1	-8.51414
ENSDARG00000020204	comp16216_c0_seq2	-0.858041
ENSDARG00000023958	comp16220_c1_seq1	5.27127
ENSDARG00000061351	comp16228_c0_seq2	1.49695
ENSDARG00000043404	comp16232_c0_seq1	0.323907
ENSDARG00000070480	comp16240_c0_seq1	-0.56134
ENSDARG00000060594	comp16242_c0_seq2	0.883876
ENSDARG00000020454	comp16243_c0_seq1	1.38864
ENSDARG00000007755	comp16247_c0_seq1	2.3719
ENSDARG00000074940	comp16250_c0_seq1	0.167127
ENSDARG00000094673	comp16253_c0_seq1	0.00371323
ENSDARG00000041619	comp16255_c0_seq1	-0.0314122
ENSDARG00000045017	comp16261_c0_seq1	-0.214479
ENSDARG00000056726	comp16264_c0_seq1	-2.45825
ENSDARG00000037675	comp16268_c0_seq1	0.519146
ENSDARG00000037675	comp16268_c0_seq2	0.358767
ENSDARG00000007377	comp16273_c0_seq1	1.08816
ENSDARG00000020258	comp16285_c0_seq1	1.0884
ENSDARG00000020258	comp16285_c0_seq2	0.382776
ENSDARG00000069846	comp16287_c0_seq1	-0.813476
ENSDARG00000080010	comp16290_c0_seq1	-4.17922
ENSDARG00000076283	comp16306_c0_seq1	1.29528
ENSDARG00000058467	comp16307_c0_seq1	0.0754312
ENSDARG00000061226	comp16309_c0_seq1	0.445992
ENSDARG00000044381	comp16318_c0_seq1	-0.729081
ENSDARG00000005774	comp16339_c0_seq1	0.355432
ENSDARG00000004427	comp16343_c0_seq2	0.516396
ENSDARG00000011934	comp16352_c0_seq1	-2.62413
ENSDARG00000035871	comp16360_c0_seq1	-7.78368
ENSDARG00000013931	comp16365_c0_seq1	-0.247165
ENSDARG00000026767	comp16366_c0_seq1	0.962318
ENSDARG00000013430	comp16369_c0_seq1	-4.3247
ENSDARG00000055283	comp16375_c0_seq1	0.287297
ENSDARG00000069476	comp16376_c0_seq1	-0.284472
ENSDARG00000023584	comp16377_c0_seq1	0.464622
ENSDARG00000015201	comp16378_c0_seq1	-1.535
ENSDARG00000015201	comp16378_c0_seq2	-0.496384
ENSDARG00000033273	comp16381_c0_seq2	0.394675
ENSDARG00000052435	comp16386_c0_seq1	0.671727
ENSDARG00000052435	comp16386_c0_seq1	0.671727
ENSDARG00000054362	comp16387_c0_seq1	0.0416558
ENSDARG00000007971	comp16392_c0_seq1	1.38708
ENSDARG00000061986	comp16397_c0_seq1	1.56339
ENSDARG00000029394	comp16400_c0_seq2	1.50444
ENSDARG00000029394	comp16400_c0_seq3	0.915151
ENSDARG00000029133	comp16402_c0_seq1	0.854653
ENSDARG00000020373	comp16405_c0_seq1	0.300362
ENSDARG00000022456	comp16408_c0_seq1	-0.568935
ENSDARG00000032296	comp16409_c0_seq1	0.0923624
ENSDARG00000032296	comp16409_c0_seq2	3.93936
ENSDARG00000000212	comp16411_c0_seq1	-3.16492
ENSDARG00000014929	comp16416_c0_seq2	-0.0287932
ENSDARG00000061764	comp16420_c0_seq1	-0.421828
ENSDARG00000007892	comp16426_c0_seq1	0.91855
ENSDARG00000078114	comp16434_c0_seq1	-0.485058
ENSDARG00000034753	comp16437_c0_seq1	-0.0165139
ENSDARG00000005191	comp16438_c0_seq1	-0.755341
ENSDARG00000060150	comp16443_c0_seq1	0.963841
ENSDARG00000060150	comp16443_c0_seq1	0.963841
ENSDARG00000003860	comp16447_c0_seq1	0.571599
ENSDARG00000003860	comp16447_c0_seq2	1.36766
ENSDARG00000035282	comp16449_c0_seq1	0.00174616
ENSDARG00000054320	comp16455_c0_seq2	1.49166
ENSDARG00000015126	comp16462_c0_seq1	0.532301
ENSDARG00000035692	comp16476_c0_seq1	-7.99082
ENSDARG00000043304	comp16482_c0_seq1	0.454372
ENSDARG00000019763	comp16484_c0_seq1	2.70382
ENSDARG00000019763	comp16484_c0_seq1	2.70382
ENSDARG00000019763	comp16484_c0_seq2	4.38431
ENSDARG00000019763	comp16484_c0_seq2	4.38431
ENSDARG00000086708	comp16485_c0_seq2	-0.553193
ENSDARG00000086708	comp16485_c0_seq4	-0.634359
ENSDARG00000042670	comp16488_c0_seq1	0.270618
ENSDARG00000042670	comp16488_c0_seq1	0.270618
ENSDARG00000042670	comp16488_c0_seq1	0.270618
ENSDARG00000042670	comp16488_c0_seq2	0.454839
ENSDARG00000042670	comp16488_c0_seq2	0.454839
ENSDARG00000018889	comp16491_c0_seq1	0.389427
ENSDARG00000079143	comp16495_c0_seq1	-0.0362998
ENSDARG00000052176	comp16497_c0_seq1	-8.63934
ENSDARG00000012468	comp16510_c0_seq1	-1.40955
ENSDARG00000074186	comp16511_c0_seq1	0.516396
ENSDARG00000034777	comp16514_c0_seq1	-1.03602
ENSDARG00000034777	comp16514_c0_seq2	-2.51571
ENSDARG00000016514	comp16520_c0_seq1	1.77983
ENSDARG00000089922	comp16521_c0_seq1	0.399881
ENSDARG00000027984	comp16523_c0_seq1	-1.41049
ENSDARG00000027984	comp16523_c0_seq2	-1.82181
ENSDARG00000026630	comp16545_c0_seq1	0.837755
ENSDARG00000012261	comp16553_c0_seq1	0.980064
ENSDARG00000044001	comp16564_c0_seq1	-0.141993
ENSDARG00000044001	comp16564_c0_seq1	-0.141993
ENSDARG00000043865	comp16568_c0_seq1	0.627248
ENSDARG00000016128	comp16574_c0_seq1	0.0971561
ENSDARG00000036875	comp16575_c0_seq1	-0.133261
ENSDARG00000040822	comp16579_c0_seq1	-0.693584
ENSDARG00000042091	comp16594_c0_seq1	-0.985443
ENSDARG00000042091	comp16594_c0_seq2	-0.658581
ENSDARG00000069122	comp16596_c0_seq1	-0.416496
ENSDARG00000069122	comp16596_c0_seq2	-0.0568792
ENSDARG00000069122	comp16596_c0_seq3	-0.667383
ENSDARG00000069122	comp16596_c0_seq4	-0.318152
ENSDARG00000039466	comp16601_c0_seq1	-9.2231
ENSDARG00000039466	comp16601_c0_seq2	-10.9584
ENSDARG00000054903	comp16622_c0_seq1	0.148049
ENSDARG00000070957	comp16627_c0_seq1	0.486665
ENSDARG00000028198	comp16638_c0_seq1	0.414647
ENSDARG00000005619	comp16640_c0_seq1	2.25566
ENSDARG00000055649	comp16646_c0_seq1	0.790732
ENSDARG00000076247	comp16651_c0_seq1	-1.06508
ENSDARG00000054818	comp16662_c0_seq1	-8.64943
ENSDARG00000056186	comp16666_c0_seq1	0.0971539
ENSDARG00000042401	comp16669_c0_seq1	0.537106
ENSDARG00000009285	comp16671_c0_seq1	-0.0359429
ENSDARG00000071040	comp16673_c0_seq4	-0.435177
ENSDARG00000077226	comp16689_c0_seq2	0.912283
ENSDARG00000077226	comp16689_c0_seq4	1.19603
ENSDARG00000076602	comp16693_c0_seq2	0.315052
ENSDARG00000076602	comp16693_c0_seq4	0.935788
ENSDARG00000040290	comp16699_c0_seq1	-2.2566
ENSDARG00000074242	comp16707_c0_seq1	-10.6955
ENSDARG00000074242	comp16707_c0_seq2	-8.67877
ENSDARG00000003213	comp16720_c0_seq1	0.450718
ENSDARG00000089245	comp16723_c0_seq1	-0.360046
ENSDARG00000017696	comp16725_c0_seq1	0.688413
ENSDARG00000045172	comp16726_c0_seq1	-0.48554
ENSDARG00000003616	comp16737_c0_seq2	0.849334
ENSDARG00000003961	comp16740_c0_seq2	1.68822
ENSDARG00000063292	comp16741_c0_seq1	0.309807
ENSDARG00000029663	comp16742_c0_seq1	0.25776
ENSDARG00000018430	comp16744_c0_seq1	-0.139163
ENSDARG00000037805	comp16760_c0_seq1	-0.198809
ENSDARG00000061908	comp16763_c0_seq2	1.01344
ENSDARG00000004714	comp16764_c0_seq4	0.180111
ENSDARG00000015797	comp16767_c0_seq1	4.27332
ENSDARG00000030560	comp16769_c0_seq1	0.780473
ENSDARG00000030560	comp16769_c0_seq2	0.531179
ENSDARG00000030560	comp16769_c0_seq4	0.0450865
ENSDARG00000076238	comp16772_c0_seq1	-0.157459
ENSDARG00000009886	comp16774_c0_seq1	-0.0888542
ENSDARG00000092693	comp16782_c0_seq1	-9.68119
ENSDARG00000036868	comp16783_c0_seq1	1.0722
ENSDARG00000089358	comp16789_c0_seq1	-0.334168
ENSDARG00000044301	comp16795_c0_seq1	-1.00773
ENSDARG00000063177	comp16797_c0_seq1	0.927047
ENSDARG00000079516	comp16800_c0_seq1	-1.03546
ENSDARG00000075434	comp16805_c0_seq1	0.402743
ENSDARG00000040184	comp16808_c0_seq1	0.802543
ENSDARG00000040184	comp16808_c0_seq2	0.0989442
ENSDARG00000059752	comp16809_c0_seq1	0.612337
ENSDARG00000076754	comp16811_c0_seq1	1.43667
ENSDARG00000021547	comp16868_c0_seq1	-0.521769
ENSDARG00000090493	comp16869_c0_seq1	-0.812133
ENSDARG00000078645	comp16874_c0_seq1	-7.17624
ENSDARG00000017316	comp16875_c0_seq1	0.279312
ENSDARG00000075045	comp16913_c0_seq1	-10.1253
ENSDARG00000053684	comp16973_c0_seq1	-8.79098
ENSDARG00000074695	comp17000_c0_seq2	0.399798
ENSDARG00000004851	comp17003_c0_seq1	-2.6289
ENSDARG00000076420	comp17012_c0_seq1	-2.50671
ENSDARG00000088443	comp17027_c0_seq1	-0.589443
ENSDARG00000015551	comp17036_c0_seq1	-10.5648
ENSDARG00000012196	comp17043_c0_seq1	1.55019
ENSDARG00000038845	comp17068_c0_seq1	-0.504764
ENSDARG00000055133	comp17085_c0_seq1	3.76748
ENSDARG00000018716	comp17086_c0_seq1	0.403993
ENSDARG00000037889	comp17095_c0_seq1	5.04617
ENSDARG00000077467	comp17117_c0_seq1	-2.24125
ENSDARG00000002980	comp17122_c0_seq1	-0.271173
ENSDARG00000090493	comp17137_c0_seq1	-0.215162
ENSDARG00000088955	comp17155_c0_seq1	-0.797918
ENSDARG00000062418	comp17162_c0_seq1	1.66931
ENSDARG00000077901	comp17164_c0_seq1	0.676687
ENSDARG00000075528	comp17165_c0_seq2	-1.2556
ENSDARG00000086495	comp17170_c0_seq1	-0.0800167
ENSDARG00000090191	comp17177_c0_seq1	0.49825
ENSDARG00000090191	comp17177_c0_seq2	1.20102
ENSDARG00000074842	comp17221_c0_seq1	-0.619679
ENSDARG00000013780	comp17236_c0_seq1	1.0694
ENSDARG00000069438	comp17244_c0_seq1	-0.0328983
ENSDARG00000095117	comp17246_c0_seq3	-0.579073
ENSDARG00000074332	comp17258_c0_seq1	2.05297
ENSDARG00000024471	comp17286_c0_seq2	7.464
ENSDARG00000086201	comp17306_c0_seq1	-2.1101
ENSDARG00000005476	comp17329_c0_seq1	-0.216263
ENSDARG00000005476	comp17329_c0_seq1	-0.216263
ENSDARG00000068289	comp17332_c0_seq1	-9.82494
ENSDARG00000060868	comp17335_c0_seq1	-0.330564
ENSDARG00000078752	comp17343_c0_seq2	-1.11492
ENSDARG00000022139	comp17385_c0_seq1	7.464
ENSDARG00000076735	comp17391_c0_seq1	1.13903
ENSDARG00000061928	comp17393_c0_seq1	1.94329
ENSDARG00000018149	comp17396_c0_seq1	-1.03025
ENSDARG00000090493	comp17416_c0_seq1	-1.15379
ENSDARG00000044588	comp17423_c0_seq1	-1.08301
ENSDARG00000009499	comp17442_c0_seq1	1.34469
ENSDARG00000015033	comp17452_c0_seq1	1.47645
ENSDARG00000076980	comp17486_c0_seq1	-0.668888
ENSDARG00000091699	comp17496_c0_seq1	1.07087
ENSDARG00000090493	comp17511_c0_seq1	-0.918966
ENSDARG00000090493	comp17511_c0_seq1	-0.918966
ENSDARG00000024561	comp17516_c0_seq1	0.400198
ENSDARG00000083189	comp17530_c0_seq1	1.31837
ENSDARG00000039729	comp17549_c0_seq1	1.41037
ENSDARG00000039729	comp17549_c0_seq2	1.70075
ENSDARG00000043371	comp17555_c0_seq1	-8.42419
ENSDARG00000028804	comp17581_c0_seq1	-1.57778
ENSDARG00000075853	comp17588_c0_seq1	0.0997165
ENSDARG00000026039	comp17594_c0_seq1	-0.698164
ENSDARG00000026039	comp17594_c0_seq1	-0.698164
ENSDARG00000054973	comp17603_c0_seq2	-0.563243
ENSDARG00000007921	comp17604_c0_seq1	0.761686
ENSDARG00000045519	comp17625_c0_seq1	-0.0175763
ENSDARG00000061928	comp17630_c0_seq1	8.32538
ENSDARG00000078326	comp1765_c0_seq1	-0.542336
ENSDARG00000058459	comp17703_c0_seq1	1.06847
ENSDARG00000041870	comp17706_c0_seq1	0.765069
ENSDARG00000008383	comp17707_c0_seq1	-7.17508
ENSDARG00000043246	comp17727_c0_seq2	0.0432262
ENSDARG00000019498	comp17753_c0_seq1	-0.355729
ENSDARG00000015856	comp17769_c0_seq1	-1.09332
ENSDARG00000036826	comp17791_c0_seq1	2.25293
ENSDARG00000036826	comp17791_c0_seq2	0.826533
ENSDARG00000025641	comp17792_c0_seq1	0.272833
ENSDARG00000090493	comp17796_c0_seq1	-0.0513292
ENSDARG00000043154	comp17799_c0_seq1	-0.68458
ENSDARG00000022187	comp17808_c0_seq1	0.487432
ENSDARG00000027381	comp17873_c0_seq1	1.85965
ENSDARG00000007412	comp17881_c0_seq1	-2.05118
ENSDARG00000058693	comp17900_c0_seq1	-10.111
ENSDARG00000088298	comp17910_c0_seq1	-0.916429
ENSDARG00000015551	comp17917_c0_seq1	-1.81514
ENSDARG00000015551	comp17917_c0_seq2	-1.27669
ENSDARG00000015551	comp17917_c0_seq3	-0.32529
ENSDARG00000040657	comp17940_c0_seq1	0.207573
ENSDARG00000068382	comp17947_c0_seq1	-1.65631
ENSDARG00000007921	comp17955_c0_seq1	0.305928
ENSDARG00000090527	comp17966_c0_seq1	2.4104
ENSDARG00000090527	comp17966_c0_seq2	0.63821
ENSDARG00000016868	comp17971_c0_seq1	-0.882472
ENSDARG00000043843	comp17979_c0_seq2	-1.04759
ENSDARG00000063371	comp17988_c0_seq1	1.75929
ENSDARG00000078705	comp18028_c0_seq1	-1.65847
ENSDARG00000036376	comp18035_c0_seq1	-9.97502
ENSDARG00000070995	comp18048_c0_seq1	-1.42442
ENSDARG00000070995	comp18048_c0_seq2	-1.01487
ENSDARG00000070995	comp18048_c0_seq3	-4.61788
ENSDARG00000045147	comp18049_c0_seq1	0.0698797
ENSDARG00000078185	comp18069_c0_seq1	-0.448085
ENSDARG00000059699	comp18085_c0_seq1	0.418528
ENSDARG00000086201	comp18156_c0_seq1	-0.906872
ENSDARG00000086495	comp18176_c0_seq1	-0.163027
ENSDARG00000095333	comp18205_c0_seq1	6.12865
ENSDARG00000075765	comp18252_c0_seq1	-0.353368
ENSDARG00000075833	comp18259_c0_seq1	-0.447444
ENSDARG00000020711	comp18298_c0_seq1	0.56615
ENSDARG00000062420	comp18315_c0_seq1	-1.97002
ENSDARG00000014770	comp18318_c0_seq1	0.566428
ENSDARG00000014770	comp18318_c0_seq2	0.658551
ENSDARG00000074590	comp18326_c0_seq1	5.99321
ENSDARG00000090493	comp18335_c0_seq1	-7.79423
ENSDARG00000086070	comp18337_c0_seq1	0.851455
ENSDARG00000089019	comp18355_c0_seq1	-0.765978
ENSDARG00000009903	comp18373_c0_seq1	-0.472733
ENSDARG00000058533	comp18374_c0_seq1	0.780473
ENSDARG00000058533	comp18374_c0_seq1	0.780473
ENSDARG00000039225	comp18397_c0_seq1	-0.548253
ENSDARG00000054723	comp18401_c0_seq1	-0.721401
ENSDARG00000061451	comp18426_c0_seq2	-0.118626
ENSDARG00000042899	comp18430_c0_seq2	-0.451337
ENSDARG00000090493	comp18432_c0_seq1	-0.973219
ENSDARG00000090493	comp18432_c0_seq2	-0.729809
ENSDARG00000034518	comp18433_c0_seq1	-0.290104
ENSDARG00000005476	comp18447_c0_seq1	-0.00976039
ENSDARG00000014685	comp18464_c0_seq1	1.6727
ENSDARG00000006811	comp18484_c0_seq1	-2.05517
ENSDARG00000018165	comp18516_c0_seq1	8.01161
ENSDARG00000037528	comp18544_c0_seq1	-0.428576
ENSDARG00000037528	comp18544_c0_seq1	-0.428576
ENSDARG00000069249	comp18547_c0_seq1	-4.88229
ENSDARG00000020328	comp18557_c0_seq2	-3.88381
ENSDARG00000090493	comp18569_c0_seq1	-1.67378
ENSDARG00000044954	comp18576_c0_seq1	2.32669
ENSDARG00000078891	comp1859_c0_seq1	0.717353
ENSDARG00000029146	comp1860_c0_seq1	4.30815
ENSDARG00000077089	comp18618_c0_seq1	2.53786
ENSDARG00000031588	comp1864_c0_seq1	-0.0392153
ENSDARG00000060537	comp18652_c0_seq1	1.09935
ENSDARG00000086495	comp18658_c0_seq1	-1.04759
ENSDARG00000057273	comp18726_c0_seq1	-0.0286033
ENSDARG00000095113	comp18729_c0_seq1	-1.73531
ENSDARG00000017864	comp18758_c0_seq1	-10.5542
ENSDARG00000025641	comp18777_c0_seq1	0.258289
ENSDARG00000090914	comp18793_c0_seq1	-1.41818
ENSDARG00000091334	comp18794_c0_seq1	-0.68458
ENSDARG00000052115	comp18803_c0_seq1	-0.432025
ENSDARG00000027381	comp18817_c0_seq1	1.66339
ENSDARG00000090265	comp18837_c0_seq1	-0.199375
ENSDARG00000035253	comp18845_c0_seq1	-2.29097
ENSDARG00000008447	comp18847_c0_seq1	-9.19617
ENSDARG00000043843	comp18861_c0_seq1	-0.905805
ENSDARG00000071331	comp18864_c0_seq1	-4.15115
ENSDARG00000033840	comp18881_c0_seq1	1.65919
ENSDARG00000096355	comp18883_c0_seq1	-0.3894
ENSDARG00000039381	comp18890_c0_seq2	-1.15949
ENSDARG00000020541	comp18907_c0_seq1	-2.46581
ENSDARG00000057481	comp18920_c0_seq1	6.36649
ENSDARG00000088967	comp18931_c0_seq1	-0.949709
ENSDARG00000088967	comp18931_c0_seq1	-0.949709
ENSDARG00000076735	comp18946_c0_seq1	1.0098
ENSDARG00000038359	comp18947_c0_seq1	-0.431776
ENSDARG00000010280	comp18949_c0_seq1	0.762276
ENSDARG00000078508	comp18953_c0_seq1	0.0992368
ENSDARG00000029370	comp18967_c0_seq1	-1.32335
ENSDARG00000077948	comp18971_c0_seq1	1.17862
ENSDARG00000063564	comp18980_c0_seq1	0.0754312
ENSDARG00000026500	comp19004_c0_seq1	-0.51085
ENSDARG00000077590	comp19008_c0_seq1	1.22267
ENSDARG00000037030	comp19034_c0_seq1	-7.99502
ENSDARG00000037030	comp19034_c0_seq3	-7.28244
ENSDARG00000061021	comp19060_c0_seq1	-0.656942
ENSDARG00000038068	comp19067_c0_seq3	0.764644
ENSDARG00000042688	comp19080_c0_seq1	3.42015
ENSDARG00000090493	comp19095_c0_seq1	-0.0188959
ENSDARG00000074465	comp19125_c0_seq1	-0.133157
ENSDARG00000011410	comp19137_c0_seq1	-0.313515
ENSDARG00000086495	comp19143_c0_seq1	-1.09582
ENSDARG00000052661	comp19148_c0_seq1	-10.7428
ENSDARG00000030604	comp19162_c0_seq1	-6.4358
ENSDARG00000030604	comp19162_c0_seq2	-9.97502
ENSDARG00000030761	comp19206_c0_seq1	-1.05667
ENSDARG00000030761	comp19206_c0_seq2	-0.399519
ENSDARG00000086201	comp19232_c0_seq1	-0.806431
ENSDARG00000060021	comp19241_c0_seq2	7.563
ENSDARG00000063358	comp19245_c0_seq2	-1.05812
ENSDARG00000063358	comp19245_c0_seq3	-0.450323
ENSDARG00000022456	comp19270_c0_seq1	-9.77122
ENSDARG00000037889	comp19278_c0_seq1	7.82476
ENSDARG00000090493	comp19291_c0_seq1	-0.153963
ENSDARG00000074895	comp19293_c0_seq1	-0.0791436
ENSDARG00000089190	comp19321_c0_seq1	0.0569917
ENSDARG00000069594	comp19332_c0_seq1	0.543283
ENSDARG00000078185	comp19338_c0_seq1	-0.0197869
ENSDARG00000078185	comp19338_c0_seq1	-0.0197869
ENSDARG00000032571	comp19364_c0_seq1	-0.864264
ENSDARG00000016074	comp19391_c0_seq1	-1.94453
ENSDARG00000016074	comp19391_c0_seq1	-1.94453
ENSDARG00000061385	comp19457_c0_seq1	1.28959
ENSDARG00000086103	comp19461_c0_seq1	-0.270627
ENSDARG00000086103	comp19461_c0_seq1	-0.270627
ENSDARG00000071107	comp19489_c0_seq2	-1.37889
ENSDARG00000086201	comp19495_c0_seq1	-1.194
ENSDARG00000090493	comp19496_c0_seq1	-0.114069
ENSDARG00000063385	comp19505_c0_seq1	6.25247
ENSDARG00000052894	comp19508_c0_seq1	1.18058
ENSDARG00000038242	comp19521_c0_seq2	-1.59129
ENSDARG00000021022	comp19524_c0_seq1	1.04719
ENSDARG00000086592	comp19551_c0_seq1	-0.562828
ENSDARG00000035256	comp19578_c0_seq1	-0.0140039
ENSDARG00000025073	comp19611_c0_seq1	-0.092595
ENSDARG00000063288	comp19633_c0_seq1	-7.93115
ENSDARG00000054723	comp19649_c0_seq1	-1.01102
ENSDARG00000076870	comp19673_c0_seq1	0.417361
ENSDARG00000052330	comp19684_c0_seq1	-1.45672
ENSDARG00000052330	comp19684_c0_seq1	-1.45672
ENSDARG00000052330	comp19684_c0_seq1	-1.45672
ENSDARG00000088348	comp19699_c0_seq1	-1.16184
ENSDARG00000086495	comp19713_c0_seq1	-0.808391
ENSDARG00000040497	comp19732_c0_seq1	-0.628464
ENSDARG00000070098	comp19748_c0_seq1	1.44507
ENSDARG00000038664	comp19764_c0_seq1	0.777981
ENSDARG00000038664	comp19764_c0_seq2	7.51435
ENSDARG00000091506	comp19764_c0_seq3	0.763162
ENSDARG00000075008	comp19800_c0_seq2	0.765772
ENSDARG00000074796	comp19805_c0_seq1	1.22795
ENSDARG00000075542	comp19825_c0_seq1	0.0743312
ENSDARG00000008243	comp19895_c0_seq1	-8.22551
ENSDARG00000014796	comp19929_c0_seq1	-4.72932
ENSDARG00000039007	comp19938_c0_seq1	-10.421
ENSDARG00000075625	comp19946_c0_seq1	-1.7399
ENSDARG00000043960	comp19965_c0_seq1	-8.92819
ENSDARG00000090493	comp19977_c0_seq1	-0.29847
ENSDARG00000070426	comp19988_c0_seq1	-1.98353
ENSDARG00000007996	comp20039_c0_seq1	0.644988
ENSDARG00000007996	comp20039_c0_seq2	8.5104
ENSDARG00000016936	comp20048_c0_seq1	0.180742
ENSDARG00000061066	comp20062_c0_seq1	-0.879459
ENSDARG00000062983	comp20070_c0_seq1	-0.192071
ENSDARG00000086201	comp20072_c0_seq1	-0.273416
ENSDARG00000028442	comp20081_c0_seq1	5.67693
ENSDARG00000062727	comp2011_c0_seq1	1.42489
ENSDARG00000077089	comp20117_c0_seq1	1.17361
ENSDARG00000062765	comp20128_c0_seq2	7.05169
ENSDARG00000071241	comp20131_c0_seq1	-0.331161
ENSDARG00000090493	comp20202_c0_seq1	-0.558197
ENSDARG00000075903	comp20226_c0_seq1	-4.97707
ENSDARG00000041616	comp20265_c0_seq1	0.677035
ENSDARG00000069566	comp20289_c0_seq1	-0.29847
ENSDARG00000019961	comp20297_c0_seq1	-1.36749
ENSDARG00000011410	comp20311_c0_seq1	-1.70443
ENSDARG00000055530	comp20355_c0_seq2	-0.654315
ENSDARG00000063101	comp20360_c0_seq1	0.384643
ENSDARG00000090493	comp20384_c0_seq1	-0.0800167
ENSDARG00000041215	comp20398_c0_seq1	-0.0502329
ENSDARG00000041215	comp20398_c0_seq2	-7.28244
ENSDARG00000005867	comp20417_c0_seq1	0.924564
ENSDARG00000096597	comp20419_c0_seq1	0.0756288
ENSDARG00000024748	comp20430_c0_seq1	-0.328567
ENSDARG00000077617	comp20434_c0_seq1	-1.30489
ENSDARG00000063102	comp20459_c0_seq1	0.181849
ENSDARG00000074695	comp20462_c0_seq1	0.936865
ENSDARG00000089190	comp20468_c0_seq1	0.473619
ENSDARG00000056480	comp20486_c0_seq1	0.088582
ENSDARG00000011000	comp20537_c0_seq2	2.74013
ENSDARG00000011000	comp20537_c0_seq3	6.47215
ENSDARG00000007461	comp20544_c0_seq1	1.34388
ENSDARG00000016936	comp2056_c0_seq1	0.717353
ENSDARG00000062517	comp20561_c0_seq1	1.61074
ENSDARG00000043313	comp20574_c0_seq1	-3.54616
ENSDARG00000090493	comp20595_c0_seq2	-2.6289
ENSDARG00000019195	comp20646_c0_seq1	-0.172444
ENSDARG00000090493	comp20659_c0_seq1	-0.0286033
ENSDARG00000016181	comp2069_c0_seq1	1.11407
ENSDARG00000037030	comp20711_c0_seq1	-2.6289
ENSDARG00000017605	comp20727_c0_seq2	0.617017
ENSDARG00000086495	comp20736_c0_seq1	-0.482389
ENSDARG00000062515	comp20789_c0_seq1	-0.0286033
ENSDARG00000062646	comp20805_c0_seq1	1.45408
ENSDARG00000033144	comp20852_c0_seq1	-9.8424
ENSDARG00000043480	comp20859_c0_seq1	0.312928
ENSDARG00000041182	comp20896_c0_seq1	-0.760065
ENSDARG00000096594	comp20906_c0_seq1	0.0431587
ENSDARG00000053868	comp20921_c0_seq1	0.0890652
ENSDARG00000090493	comp20931_c0_seq1	-0.00992566
ENSDARG00000024748	comp21047_c0_seq1	-1.31602
ENSDARG00000086201	comp21084_c0_seq1	-1.2628
ENSDARG00000045528	comp21133_c0_seq1	2.1363
ENSDARG00000090493	comp21141_c0_seq1	-0.956235
ENSDARG00000088443	comp21142_c0_seq2	-0.74916
ENSDARG00000096355	comp21145_c0_seq1	-1.73893
ENSDARG00000027381	comp21173_c0_seq1	1.71194
ENSDARG00000088260	comp21175_c0_seq1	-0.672065
ENSDARG00000088260	comp21175_c0_seq2	-2.1906
ENSDARG00000052129	comp21201_c0_seq1	-0.00986995
ENSDARG00000013860	comp21244_c0_seq2	-1.30474
ENSDARG00000061121	comp21279_c0_seq1	-2.07714
ENSDARG00000061121	comp21279_c0_seq1	-2.07714
ENSDARG00000003693	comp21290_c0_seq1	0.299263
ENSDARG00000041140	comp21330_c0_seq1	-0.294378
ENSDARG00000086495	comp21331_c0_seq1	-1.06838
ENSDARG00000013804	comp21335_c0_seq1	-11.4942
ENSDARG00000054272	comp21357_c0_seq1	-9.71544
ENSDARG00000078479	comp21411_c0_seq1	-1.28923
ENSDARG00000070774	comp21412_c0_seq1	-0.156952
ENSDARG00000091766	comp21425_c0_seq1	0.835367
ENSDARG00000087674	comp21463_c0_seq1	5.48831
ENSDARG00000028056	comp21489_c0_seq1	0.726123
ENSDARG00000087532	comp21513_c0_seq1	-1.16184
ENSDARG00000086201	comp21585_c0_seq1	-1.25271
ENSDARG00000004724	comp21613_c0_seq1	-0.513476
ENSDARG00000031222	comp21659_c0_seq1	1.89561
ENSDARG00000007172	comp21663_c0_seq1	0.568053
ENSDARG00000079457	comp21674_c0_seq1	0.180742
ENSDARG00000086112	comp21676_c0_seq1	0.400478
ENSDARG00000076501	comp21677_c0_seq1	-0.0463234
ENSDARG00000089873	comp21704_c0_seq1	-2.6408
ENSDARG00000013928	comp21716_c0_seq1	-0.072503
ENSDARG00000075647	comp21743_c0_seq1	-0.453045
ENSDARG00000060238	comp21759_c0_seq1	-3.1779
ENSDARG00000043371	comp21893_c0_seq1	-9.16874
ENSDARG00000030602	comp21894_c0_seq1	-0.145157
ENSDARG00000074690	comp21896_c0_seq1	-0.566791
ENSDARG00000074690	comp21896_c0_seq2	-0.594328
ENSDARG00000037066	comp21904_c0_seq1	-0.785396
ENSDARG00000075542	comp21935_c0_seq1	0.317589
ENSDARG00000075542	comp21935_c0_seq2	0.305928
ENSDARG00000015970	comp21947_c0_seq2	-0.565488
ENSDARG00000074695	comp21955_c0_seq1	1.53256
ENSDARG00000074695	comp21955_c0_seq1	1.53256
ENSDARG00000054632	comp21971_c0_seq1	0.310367
ENSDARG00000069473	comp22022_c0_seq1	2.36341
ENSDARG00000087038	comp22043_c0_seq1	-0.32529
ENSDARG00000061786	comp22106_c0_seq1	0.658551
ENSDARG00000090493	comp22128_c0_seq1	-0.400904
ENSDARG00000051916	comp22133_c0_seq1	2.23747
ENSDARG00000068431	comp22139_c0_seq1	-0.100961
ENSDARG00000041734	comp22228_c0_seq1	0.214266
ENSDARG00000060058	comp22237_c0_seq1	-0.28043
ENSDARG00000069476	comp22248_c0_seq1	-9.39867
ENSDARG00000011825	comp22268_c0_seq2	1.7922
ENSDARG00000040085	comp22273_c0_seq1	0.055364
ENSDARG00000039213	comp22314_c0_seq1	0.0980534
ENSDARG00000089797	comp22321_c0_seq1	-0.100457
ENSDARG00000090493	comp22331_c0_seq1	-0.0800167
ENSDARG00000036388	comp22332_c0_seq1	1.09427
ENSDARG00000044001	comp22346_c0_seq1	-9.87672
ENSDARG00000045665	comp2235_c0_seq1	1.68047
ENSDARG00000088026	comp22374_c0_seq1	-0.149632
ENSDARG00000090493	comp22375_c0_seq2	-6.80072
ENSDARG00000068493	comp22378_c0_seq1	-1.5646
ENSDARG00000021046	comp22411_c0_seq1	-2.30722
ENSDARG00000021046	comp22411_c0_seq1	-2.30722
ENSDARG00000021046	comp22411_c0_seq2	-1.5213
ENSDARG00000021046	comp22411_c0_seq2	-1.5213
ENSDARG00000056119	comp22441_c0_seq1	-5.91786
ENSDARG00000020143	comp22456_c0_seq1	-7.36266
ENSDARG00000086201	comp22461_c0_seq1	-1.276
ENSDARG00000061890	comp22495_c0_seq1	1.87521
ENSDARG00000097539	comp22523_c0_seq1	-2.05446
ENSDARG00000097539	comp22523_c0_seq2	-0.79321
ENSDARG00000031737	comp22531_c0_seq1	2.23585
ENSDARG00000031737	comp22531_c0_seq1	2.23585
ENSDARG00000037097	comp22539_c0_seq1	-3.67371
ENSDARG00000088816	comp22544_c0_seq1	-0.569705
ENSDARG00000021405	comp22552_c0_seq1	-0.283666
ENSDARG00000024874	comp22613_c0_seq1	1.05606
ENSDARG00000042620	comp22630_c0_seq1	-9.46783
ENSDARG00000077217	comp22637_c0_seq1	-0.345134
ENSDARG00000071377	comp22653_c0_seq1	-2.23218
ENSDARG00000074625	comp22659_c0_seq1	-0.326825
ENSDARG00000071196	comp22661_c0_seq1	-1.25104
ENSDARG00000086495	comp2267_c0_seq1	-1.52945
ENSDARG00000054748	comp22673_c0_seq1	0.256978
ENSDARG00000008384	comp22688_c0_seq1	0.132716
ENSDARG00000079350	comp22700_c0_seq1	-0.290104
ENSDARG00000087038	comp22701_c0_seq1	-1.35858
ENSDARG00000077318	comp22709_c0_seq1	1.56913
ENSDARG00000090493	comp22764_c0_seq1	-1.42775
ENSDARG00000089358	comp22772_c0_seq1	-1.41469
ENSDARG00000008384	comp22773_c0_seq1	0.427156
ENSDARG00000030156	comp22832_c0_seq1	0.465815
ENSDARG00000086495	comp22887_c0_seq1	-1.36749
ENSDARG00000020278	comp22900_c0_seq1	-7.38136
ENSDARG00000020278	comp22900_c0_seq1	-7.38136
ENSDARG00000020278	comp22900_c0_seq2	-2.35592
ENSDARG00000020278	comp22900_c0_seq3	-1.28049
ENSDARG00000020278	comp22900_c0_seq4	-6.65015
ENSDARG00000020278	comp22900_c0_seq4	-6.65015
ENSDARG00000058292	comp22906_c0_seq1	0.555489
ENSDARG00000058292	comp22906_c0_seq2	0.752926
ENSDARG00000036595	comp22929_c0_seq2	1.22853
ENSDARG00000090493	comp22934_c0_seq1	-0.939535
ENSDARG00000076228	comp22945_c0_seq1	3.59119
ENSDARG00000062573	comp22946_c0_seq1	0.0366861
ENSDARG00000078691	comp22986_c0_seq1	-0.0891563
ENSDARG00000021059	comp23062_c0_seq1	-10.3738
ENSDARG00000018882	comp23088_c0_seq1	-0.398636
ENSDARG00000071017	comp23100_c0_seq1	-3.23944
ENSDARG00000043562	comp23113_c0_seq1	-1.36123
ENSDARG00000043562	comp23113_c0_seq2	-1.46634
ENSDARG00000076861	comp23117_c0_seq1	-0.327312
ENSDARG00000086201	comp2312_c0_seq1	-1.33449
ENSDARG00000035837	comp23134_c0_seq1	0.515746
ENSDARG00000088072	comp23210_c0_seq1	0.583298
ENSDARG00000078890	comp23215_c0_seq1	0.280685
ENSDARG00000078969	comp23236_c0_seq1	1.1128
ENSDARG00000078969	comp23236_c0_seq2	7.563
ENSDARG00000086201	comp23250_c0_seq1	-1.276
ENSDARG00000086201	comp23250_c0_seq2	-0.695108
ENSDARG00000090493	comp23258_c0_seq1	-1.18303
ENSDARG00000014430	comp23261_c0_seq1	-0.05638
ENSDARG00000075747	comp23273_c0_seq1	0.212846
ENSDARG00000095030	comp23323_c1_seq1	-3.59079
ENSDARG00000077024	comp23326_c0_seq1	0.385419
ENSDARG00000034897	comp23337_c0_seq1	-7.764
ENSDARG00000040163	comp23342_c0_seq1	0.423903
ENSDARG00000042018	comp23355_c0_seq1	-2.27368
ENSDARG00000071694	comp23364_c0_seq1	1.60556
ENSDARG00000057143	comp23368_c0_seq1	0.139778
ENSDARG00000033171	comp23378_c0_seq1	0.379819
ENSDARG00000033437	comp23386_c0_seq1	-0.77292
ENSDARG00000039980	comp23392_c0_seq1	-0.0330589
ENSDARG00000094010	comp234_c0_seq2	-1.50545
ENSDARG00000003592	comp23417_c0_seq1	-0.510529
ENSDARG00000003592	comp23417_c0_seq2	-1.36031
ENSDARG00000043680	comp23425_c0_seq1	1.61489
ENSDARG00000043680	comp23425_c0_seq5	8.01161
ENSDARG00000059553	comp23444_c0_seq1	1.03663
ENSDARG00000059553	comp23444_c0_seq2	0.481441
ENSDARG00000039641	comp23458_c0_seq1	-9.80128
ENSDARG00000039499	comp23459_c0_seq1	-2.95684
ENSDARG00000004948	comp23491_c0_seq1	-10.8503
ENSDARG00000074759	comp23493_c0_seq1	-10.4892
ENSDARG00000074759	comp23493_c0_seq1	-10.4892
ENSDARG00000017929	comp23504_c0_seq1	-0.685336
ENSDARG00000042894	comp23527_c0_seq1	0.976689
ENSDARG00000024219	comp23540_c0_seq4	-1.49931
ENSDARG00000093093	comp23554_c0_seq1	0.355939
ENSDARG00000090493	comp23561_c0_seq1	-0.249383
ENSDARG00000016044	comp23566_c0_seq1	0.309286
ENSDARG00000090493	comp23572_c0_seq1	-1.92136
ENSDARG00000025073	comp23578_c0_seq1	-0.909846
ENSDARG00000074465	comp23582_c0_seq1	-0.203607
ENSDARG00000088026	comp23584_c0_seq1	-0.105939
ENSDARG00000090493	comp23587_c0_seq1	-1.59192
ENSDARG00000090493	comp23587_c0_seq2	-1.72048
ENSDARG00000087529	comp23591_c0_seq1	3.2969
ENSDARG00000005104	comp23600_c0_seq1	-0.809286
ENSDARG00000005104	comp23600_c0_seq1	-0.809286
ENSDARG00000059841	comp23609_c0_seq1	-0.408286
ENSDARG00000075421	comp23611_c0_seq1	0.787622
ENSDARG00000074297	comp23635_c0_seq1	-0.974671
ENSDARG00000020960	comp23646_c0_seq2	0.138236
ENSDARG00000053691	comp23685_c0_seq1	-0.246041
ENSDARG00000011609	comp23686_c0_seq2	6.66276
ENSDARG00000045033	comp23701_c0_seq1	-1.62478
ENSDARG00000090493	comp23702_c0_seq1	-0.228632
ENSDARG00000079555	comp23704_c0_seq1	-0.344133
ENSDARG00000014867	comp23708_c0_seq1	-12.1631
ENSDARG00000043658	comp23719_c0_seq2	-0.723283
ENSDARG00000038882	comp23729_c0_seq1	2.05452
ENSDARG00000042458	comp23735_c0_seq1	0.447176
ENSDARG00000042458	comp23735_c0_seq2	7.18199
ENSDARG00000079085	comp23743_c0_seq1	-0.434049
ENSDARG00000017910	comp23764_c0_seq1	0.0801398
ENSDARG00000009693	comp23784_c0_seq2	1.18453
ENSDARG00000058231	comp23795_c0_seq1	-1.86671
ENSDARG00000090493	comp238_c0_seq1	-0.221499
ENSDARG00000070828	comp23824_c0_seq1	1.0808
ENSDARG00000040296	comp23843_c0_seq1	0.953603
ENSDARG00000018334	comp23849_c0_seq1	-11.2011
ENSDARG00000013012	comp23853_c0_seq1	-11.8105
ENSDARG00000062632	comp23854_c0_seq1	7.464
ENSDARG00000014941	comp23858_c0_seq1	0.114642
ENSDARG00000035187	comp23875_c0_seq1	0.368674
ENSDARG00000068965	comp23890_c0_seq1	0.0992368
ENSDARG00000036359	comp23903_c0_seq2	-2.59437
ENSDARG00000024587	comp23972_c0_seq1	-0.95014
ENSDARG00000024587	comp23972_c0_seq2	-2.67353
ENSDARG00000045351	comp23980_c0_seq1	0.260366
ENSDARG00000094673	comp23992_c0_seq1	0.327611
ENSDARG00000090493	comp23995_c0_seq1	-0.675926
ENSDARG00000091298	comp23998_c0_seq1	-3.05821
ENSDARG00000012987	comp24004_c0_seq1	-8.71715
ENSDARG00000078433	comp24019_c0_seq1	0.360494
ENSDARG00000016608	comp24020_c0_seq1	0.309163
ENSDARG00000053365	comp24040_c0_seq1	-8.33269
ENSDARG00000038789	comp24042_c0_seq1	-1.22171
ENSDARG00000063407	comp24059_c0_seq1	-4.51798
ENSDARG00000087333	comp24061_c0_seq1	0.156189
ENSDARG00000087333	comp24061_c0_seq2	0.681975
ENSDARG00000006811	comp24064_c0_seq1	-2.09629
ENSDARG00000005425	comp24076_c0_seq2	0.306491
ENSDARG00000039347	comp24078_c0_seq1	-13.1366
ENSDARG00000087038	comp24085_c0_seq1	-0.328567
ENSDARG00000070849	comp24103_c0_seq1	-12.4405
ENSDARG00000075621	comp24117_c0_seq1	0.275556
ENSDARG00000077737	comp24121_c0_seq1	-1.21787
ENSDARG00000087193	comp24133_c0_seq1	-1.01925
ENSDARG00000035986	comp24142_c0_seq1	-0.125226
ENSDARG00000055893	comp24145_c0_seq3	-2.34325
ENSDARG00000076964	comp24157_c0_seq1	1.79176
ENSDARG00000017864	comp24198_c0_seq1	-10.6761
ENSDARG00000059120	comp24199_c0_seq3	-2.28965
ENSDARG00000090493	comp24200_c0_seq1	-0.55256
ENSDARG00000069988	comp24201_c0_seq1	-1.64774
ENSDARG00000071500	comp24220_c0_seq1	-0.241811
ENSDARG00000061951	comp24225_c0_seq1	-10.1675
ENSDARG00000031954	comp24235_c0_seq1	-1.32268
ENSDARG00000031954	comp24235_c0_seq2	-0.20322
ENSDARG00000006729	comp2424_c0_seq1	-5.13307
ENSDARG00000027109	comp24243_c0_seq1	0.221848
ENSDARG00000073898	comp24247_c0_seq1	0.861685
ENSDARG00000073898	comp24247_c0_seq2	0.762475
ENSDARG00000055917	comp24273_c0_seq1	0.0755575
ENSDARG00000006389	comp24288_c0_seq2	0.147651
ENSDARG00000058467	comp24289_c0_seq1	0.364739
ENSDARG00000058467	comp24289_c0_seq2	0.182421
ENSDARG00000090493	comp24291_c0_seq1	-0.524645
ENSDARG00000039882	comp24295_c0_seq1	0.967508
ENSDARG00000086201	comp24298_c0_seq1	-0.482389
ENSDARG00000074337	comp24302_c0_seq2	0.80112
ENSDARG00000011219	comp24305_c0_seq1	0.587841
ENSDARG00000090493	comp24318_c0_seq2	-0.283666
ENSDARG00000007320	comp24321_c0_seq1	-10.2388
ENSDARG00000091640	comp24347_c0_seq1	0.656741
ENSDARG00000090493	comp24350_c0_seq1	-0.178949
ENSDARG00000036875	comp24358_c0_seq1	-9.97255
ENSDARG00000041022	comp24370_c0_seq1	-1.07896
ENSDARG00000027200	comp24374_c0_seq1	-0.264363
ENSDARG00000060962	comp24375_c0_seq1	-0.492999
ENSDARG00000078326	comp24382_c0_seq1	-0.543971
ENSDARG00000015070	comp24397_c0_seq1	8.9368
ENSDARG00000015070	comp24397_c0_seq2	0.838156
ENSDARG00000007807	comp24398_c0_seq1	2.07715
ENSDARG00000086495	comp24399_c0_seq1	-1.16184
ENSDARG00000057940	comp24402_c0_seq1	-0.81392
ENSDARG00000058676	comp24404_c0_seq1	1.52467
ENSDARG00000042236	comp24422_c0_seq1	1.29438
ENSDARG00000020153	comp24424_c0_seq1	-11.1459
ENSDARG00000063432	comp24428_c0_seq1	0.421588
ENSDARG00000027887	comp24432_c0_seq1	-1.59179
ENSDARG00000041435	comp24452_c0_seq1	-6.01811
ENSDARG00000035694	comp24453_c0_seq1	-2.21433
ENSDARG00000086283	comp24462_c0_seq1	-0.362858
ENSDARG00000075930	comp24481_c0_seq1	-2.35777
ENSDARG00000019532	comp24484_c0_seq1	-1.8624
ENSDARG00000037570	comp24495_c0_seq1	0.306012
ENSDARG00000013307	comp24500_c0_seq1	-12.6334
ENSDARG00000019293	comp24507_c0_seq1	1.3827
ENSDARG00000006316	comp24548_c0_seq1	-8.53666
ENSDARG00000086495	comp2456_c0_seq1	-1.58682
ENSDARG00000011665	comp24595_c0_seq1	-6.33423
ENSDARG00000001210	comp24596_c0_seq1	0.283974
ENSDARG00000001210	comp24596_c0_seq2	3.21901
ENSDARG00000061294	comp24600_c0_seq1	0.268296
ENSDARG00000043177	comp24601_c0_seq1	0.324151
ENSDARG00000008765	comp24608_c0_seq1	8.14541
ENSDARG00000008765	comp24608_c0_seq2	0.872191
ENSDARG00000074444	comp24610_c0_seq3	6.12865
ENSDARG00000074444	comp24610_c0_seq4	7.30149
ENSDARG00000074444	comp24610_c0_seq5	0.526959
ENSDARG00000089797	comp24614_c0_seq1	-0.210723
ENSDARG00000018022	comp24624_c0_seq1	0.483193
ENSDARG00000016156	comp24631_c0_seq1	-1.00762
ENSDARG00000016156	comp24631_c0_seq4	-0.19642
ENSDARG00000016156	comp24631_c0_seq5	-2.24154
ENSDARG00000016156	comp24631_c0_seq6	-1.34391
ENSDARG00000033993	comp24634_c0_seq1	0.490356
ENSDARG00000002479	comp24638_c0_seq1	3.61517
ENSDARG00000002479	comp24638_c0_seq1	3.61517
ENSDARG00000042389	comp24653_c0_seq1	-12.5022
ENSDARG00000032780	comp24654_c0_seq1	0.0337405
ENSDARG00000075559	comp24661_c0_seq1	1.02449
ENSDARG00000075559	comp24661_c0_seq2	1.47401
ENSDARG00000012892	comp24670_c0_seq1	0.156052
ENSDARG00000012892	comp24670_c0_seq1	0.156052
ENSDARG00000045843	comp24682_c0_seq1	0.792308
ENSDARG00000019649	comp24707_c0_seq1	0.226948
ENSDARG00000019649	comp24707_c0_seq1	0.226948
ENSDARG00000011851	comp24722_c0_seq1	-0.0383239
ENSDARG00000011515	comp24733_c0_seq1	-0.241107
ENSDARG00000036678	comp24740_c0_seq1	0.66671
ENSDARG00000032103	comp24749_c0_seq1	2.35892
ENSDARG00000032103	comp24749_c0_seq1	2.35892
ENSDARG00000013581	comp24759_c0_seq1	-0.927294
ENSDARG00000091109	comp24775_c0_seq3	-0.252292
ENSDARG00000079628	comp24783_c0_seq1	-0.73697
ENSDARG00000074611	comp24795_c0_seq2	-1.60064
ENSDARG00000035770	comp24796_c0_seq1	1.79031
ENSDARG00000021974	comp24797_c0_seq1	0.958666
ENSDARG00000021974	comp24797_c0_seq2	0.0611819
ENSDARG00000071518	comp24802_c0_seq1	-1.58429
ENSDARG00000090904	comp24806_c0_seq1	0.352117
ENSDARG00000077204	comp24808_c0_seq1	-0.496512
ENSDARG00000079949	comp24809_c0_seq1	0.388259
ENSDARG00000077822	comp24814_c0_seq1	0.847452
ENSDARG00000091273	comp24879_c0_seq1	2.20173
ENSDARG00000097218	comp24900_c0_seq1	-0.0851356
ENSDARG00000056193	comp24906_c0_seq1	0.290289
ENSDARG00000056193	comp24906_c0_seq1	0.290289
ENSDARG00000080010	comp24914_c0_seq1	-1.75624
ENSDARG00000018745	comp24932_c0_seq1	0.11178
ENSDARG00000015546	comp24936_c0_seq1	-3.33619
ENSDARG00000076755	comp24946_c0_seq1	-0.0667837
ENSDARG00000061688	comp24947_c0_seq1	0.130789
ENSDARG00000061688	comp24947_c0_seq2	0.412577
ENSDARG00000008487	comp24950_c0_seq1	0.53886
ENSDARG00000089797	comp24964_c0_seq2	-0.913024
ENSDARG00000054032	comp24998_c0_seq1	-0.50761
ENSDARG00000054032	comp24998_c0_seq1	-0.50761
ENSDARG00000080009	comp25011_c0_seq1	-0.320433
ENSDARG00000080009	comp25011_c0_seq1	-0.320433
ENSDARG00000069518	comp25023_c0_seq1	-0.180914
ENSDARG00000034195	comp25031_c0_seq1	0.795458
ENSDARG00000034195	comp25031_c0_seq2	1.72915
ENSDARG00000034195	comp25031_c0_seq2	1.72915
ENSDARG00000042742	comp25037_c0_seq1	0.250868
ENSDARG00000008502	comp25038_c0_seq1	-0.884064
ENSDARG00000090493	comp25041_c0_seq1	-0.291943
ENSDARG00000016656	comp25042_c0_seq2	6.47215
ENSDARG00000042615	comp25047_c0_seq1	0.15611
ENSDARG00000089123	comp25053_c0_seq1	-6.07235
ENSDARG00000020449	comp25056_c0_seq1	-1.23666
ENSDARG00000020449	comp25056_c0_seq2	-1.14485
ENSDARG00000028715	comp25064_c0_seq1	-0.399519
ENSDARG00000028715	comp25064_c0_seq2	-0.145788
ENSDARG00000038635	comp25068_c0_seq1	0.0373535
ENSDARG00000063578	comp25073_c0_seq1	-1.35409
ENSDARG00000086201	comp25082_c0_seq1	-1.32208
ENSDARG00000008278	comp25093_c0_seq1	0.766403
ENSDARG00000008278	comp25093_c0_seq2	7.464
ENSDARG00000030176	comp25095_c0_seq1	-4.05112
ENSDARG00000090493	comp25101_c0_seq1	-1.02042
ENSDARG00000090194	comp25105_c0_seq1	-0.042092
ENSDARG00000015053	comp25106_c0_seq1	0.0679371
ENSDARG00000039424	comp25112_c0_seq1	0.272496
ENSDARG00000034894	comp25113_c0_seq1	2.21104
ENSDARG00000034894	comp25113_c0_seq2	9.71626
ENSDARG00000040930	comp25123_c0_seq1	-1.0433
ENSDARG00000063182	comp25124_c0_seq1	-0.789424
ENSDARG00000041619	comp25131_c0_seq1	-0.17638
ENSDARG00000018283	comp25183_c0_seq1	-10.3249
ENSDARG00000053106	comp25192_c0_seq1	4.70486
ENSDARG00000053106	comp25192_c0_seq4	6.90844
ENSDARG00000062187	comp2520_c0_seq1	6.25247
ENSDARG00000062579	comp25203_c0_seq1	8.26785
ENSDARG00000055649	comp25204_c0_seq1	1.17707
ENSDARG00000034895	comp25218_c0_seq1	1.49741
ENSDARG00000034895	comp25218_c0_seq1	1.49741
ENSDARG00000096359	comp25233_c0_seq1	1.8714
ENSDARG00000069379	comp25254_c0_seq1	-2.49613
ENSDARG00000069379	comp25254_c0_seq2	-1.17382
ENSDARG00000078508	comp25295_c0_seq1	1.22233
ENSDARG00000039217	comp25303_c0_seq1	1.64032
ENSDARG00000073952	comp25304_c0_seq1	0.797636
ENSDARG00000053444	comp25348_c0_seq1	0.699421
ENSDARG00000053444	comp25348_c0_seq1	0.699421
ENSDARG00000036781	comp25374_c0_seq1	0.842519
ENSDARG00000086908	comp25375_c0_seq1	0.360241
ENSDARG00000074161	comp25388_c0_seq1	1.28958
ENSDARG00000011219	comp25448_c0_seq1	0.537162
ENSDARG00000011219	comp25448_c0_seq1	0.537162
ENSDARG00000044011	comp25450_c0_seq1	-0.0542485
ENSDARG00000022350	comp25457_c0_seq1	0.466937
ENSDARG00000002613	comp25463_c0_seq1	0.442203
ENSDARG00000040884	comp25476_c0_seq1	0.989298
ENSDARG00000040884	comp25476_c0_seq2	0.53305
ENSDARG00000007751	comp25487_c0_seq1	0.615794
ENSDARG00000062123	comp25492_c0_seq1	0.205082
ENSDARG00000062123	comp25492_c0_seq2	0.760007
ENSDARG00000062846	comp25506_c0_seq1	0.753517
ENSDARG00000060434	comp25510_c0_seq1	3.68629
ENSDARG00000078333	comp25532_c0_seq1	-0.629661
ENSDARG00000090493	comp25552_c0_seq1	-0.00990702
ENSDARG00000034555	comp25553_c0_seq1	0.456015
ENSDARG00000021366	comp25556_c0_seq1	-6.74672
ENSDARG00000044405	comp25562_c0_seq1	1.15738
ENSDARG00000032535	comp25574_c0_seq1	0.552784
ENSDARG00000004724	comp25575_c0_seq1	-5.23255
ENSDARG00000004724	comp25575_c0_seq3	-5.28591
ENSDARG00000055649	comp25578_c0_seq2	3.92355
ENSDARG00000059871	comp25589_c0_seq1	-0.734511
ENSDARG00000076584	comp25591_c0_seq2	-0.987678
ENSDARG00000015835	comp25593_c0_seq1	0.492426
ENSDARG00000041085	comp25604_c0_seq2	-0.91021
ENSDARG00000026489	comp25636_c0_seq1	0.511578
ENSDARG00000026489	comp25636_c0_seq1	0.511578
ENSDARG00000026489	comp25636_c0_seq2	0.306691
ENSDARG00000026489	comp25636_c0_seq2	0.306691
ENSDARG00000026489	comp25636_c0_seq3	0.0612992
ENSDARG00000026489	comp25636_c0_seq3	0.0612992
ENSDARG00000079834	comp25638_c0_seq2	-0.0961418
ENSDARG00000006729	comp25641_c0_seq1	-0.606624
ENSDARG00000045224	comp25654_c0_seq4	0.868414
ENSDARG00000070231	comp25660_c0_seq1	-0.00785149
ENSDARG00000004735	comp25666_c0_seq1	0.605546
ENSDARG00000056725	comp25675_c0_seq1	1.40797
ENSDARG00000008243	comp25685_c0_seq1	-0.0815014
ENSDARG00000008243	comp25685_c0_seq2	-1.64729
ENSDARG00000055192	comp25690_c0_seq2	-6.1675
ENSDARG00000006025	comp25691_c0_seq1	-2.91308
ENSDARG00000092704	comp25701_c0_seq1	-0.394898
ENSDARG00000074242	comp25706_c0_seq3	-0.963892
ENSDARG00000042133	comp25707_c0_seq1	-1.51967
ENSDARG00000062745	comp25708_c0_seq1	0.940074
ENSDARG00000086103	comp25715_c0_seq1	-0.981671
ENSDARG00000086103	comp25715_c0_seq1	-0.981671
ENSDARG00000029473	comp25720_c0_seq1	-8.55274
ENSDARG00000030053	comp25721_c0_seq1	-1.0863
ENSDARG00000030053	comp25721_c0_seq2	-1.7625
ENSDARG00000030053	comp25721_c0_seq3	-0.742557
ENSDARG00000091076	comp25726_c0_seq1	-11.0514
ENSDARG00000074758	comp25740_c0_seq1	-5.09312
ENSDARG00000074758	comp25740_c0_seq3	-5.08547
ENSDARG00000053684	comp25744_c0_seq1	-1.48762
ENSDARG00000021866	comp25750_c0_seq1	-0.797617
ENSDARG00000017794	comp25754_c0_seq1	0.278887
ENSDARG00000062329	comp25755_c0_seq1	-0.25132
ENSDARG00000062109	comp25757_c0_seq1	3.39201
ENSDARG00000062109	comp25757_c0_seq1	3.39201
ENSDARG00000062109	comp25757_c0_seq2	2.40242
ENSDARG00000035074	comp25758_c0_seq1	1.56306
ENSDARG00000035074	comp25758_c0_seq3	7.6998
ENSDARG00000052646	comp25759_c0_seq1	-0.812839
ENSDARG00000067950	comp25760_c0_seq1	1.84904
ENSDARG00000018742	comp25769_c0_seq1	0.5014
ENSDARG00000018742	comp25769_c0_seq2	0.579737
ENSDARG00000080010	comp25772_c0_seq1	-0.921873
ENSDARG00000093931	comp25775_c0_seq1	0.696587
ENSDARG00000068289	comp25779_c0_seq1	-0.690604
ENSDARG00000068289	comp25779_c0_seq1	-0.690604
ENSDARG00000021973	comp25792_c0_seq1	-0.0668581
ENSDARG00000035535	comp25802_c0_seq1	0.272108
ENSDARG00000060372	comp25811_c0_seq1	0.325799
ENSDARG00000079512	comp25815_c0_seq1	0.323008
ENSDARG00000045487	comp25847_c0_seq1	-0.779288
ENSDARG00000090493	comp25854_c0_seq1	-1.01607
ENSDARG00000004757	comp25859_c0_seq1	-1.93891
ENSDARG00000070953	comp2586_c0_seq1	-0.388775
ENSDARG00000040623	comp25873_c0_seq1	3.68738
ENSDARG00000039466	comp25874_c0_seq1	-10.752
ENSDARG00000063445	comp25877_c0_seq1	-0.671684
ENSDARG00000018334	comp25900_c0_seq1	-0.192626
ENSDARG00000060688	comp25902_c0_seq1	0.549731
ENSDARG00000007247	comp25908_c0_seq1	-0.3823
ENSDARG00000007247	comp25908_c0_seq1	-0.3823
ENSDARG00000004460	comp25914_c0_seq1	0.665725
ENSDARG00000062307	comp25919_c0_seq1	0.16872
ENSDARG00000087393	comp25922_c0_seq1	2.05516
ENSDARG00000078441	comp25928_c0_seq1	1.46169
ENSDARG00000078441	comp25928_c0_seq2	8.38071
ENSDARG00000078441	comp25928_c0_seq3	1.81481
ENSDARG00000037020	comp25934_c0_seq1	1.90036
ENSDARG00000068374	comp25936_c0_seq2	-1.63219
ENSDARG00000006038	comp25943_c0_seq1	8.2382
ENSDARG00000039641	comp25947_c0_seq1	-0.414966
ENSDARG00000077029	comp25952_c0_seq1	2.06866
ENSDARG00000030716	comp25959_c0_seq1	0.604003
ENSDARG00000043257	comp25970_c0_seq1	1.66799
ENSDARG00000043257	comp25970_c0_seq1	1.66799
ENSDARG00000040439	comp25981_c0_seq1	-2.16867
ENSDARG00000074245	comp25986_c0_seq1	-7.99502
ENSDARG00000093597	comp25997_c0_seq1	0.842423
ENSDARG00000026829	comp25999_c0_seq1	-0.274122
ENSDARG00000026829	comp25999_c0_seq1	-0.274122
ENSDARG00000008811	comp26003_c0_seq1	0.698236
ENSDARG00000061219	comp26018_c0_seq1	0.0178935
ENSDARG00000061219	comp26018_c0_seq2	3.50436
ENSDARG00000061219	comp26018_c0_seq3	0.960925
ENSDARG00000061219	comp26018_c0_seq4	1.40923
ENSDARG00000040803	comp26024_c0_seq1	0.211923
ENSDARG00000017624	comp26036_c0_seq1	-0.770619
ENSDARG00000088595	comp26037_c0_seq1	-1.1447
ENSDARG00000075936	comp26046_c0_seq1	-0.22752
ENSDARG00000036065	comp26058_c0_seq1	0.719514
ENSDARG00000036065	comp26058_c0_seq1	0.719514
ENSDARG00000036065	comp26058_c0_seq1	0.719514
ENSDARG00000036065	comp26058_c0_seq1	0.719514
ENSDARG00000040566	comp26060_c0_seq1	0.612332
ENSDARG00000059888	comp26069_c0_seq2	4.70486
ENSDARG00000013926	comp26086_c0_seq1	0.224817
ENSDARG00000043976	comp26092_c0_seq1	2.42197
ENSDARG00000043976	comp26092_c0_seq2	1.82712
ENSDARG00000074690	comp26099_c0_seq1	-1.04118
ENSDARG00000070353	comp26103_c0_seq1	0.829164
ENSDARG00000070353	comp26103_c0_seq1	0.829164
ENSDARG00000058346	comp26106_c0_seq1	1.69661
ENSDARG00000095826	comp26113_c0_seq1	-1.09368
ENSDARG00000095826	comp26113_c0_seq1	-1.09368
ENSDARG00000073731	comp26126_c0_seq1	0.718582
ENSDARG00000073731	comp26126_c0_seq1	0.718582
ENSDARG00000073731	comp26126_c0_seq2	1.02404
ENSDARG00000073731	comp26126_c0_seq2	1.02404
ENSDARG00000073731	comp26126_c0_seq2	1.02404
ENSDARG00000001889	comp26127_c0_seq2	0.716355
ENSDARG00000089546	comp26129_c0_seq1	0.986289
ENSDARG00000090493	comp26138_c0_seq1	-3.62008
ENSDARG00000090493	comp26138_c0_seq4	-2.17388
ENSDARG00000089002	comp26142_c0_seq2	0.339023
ENSDARG00000005122	comp26144_c0_seq1	0.576984
ENSDARG00000020261	comp26146_c0_seq1	0.766894
ENSDARG00000075162	comp26160_c0_seq1	-0.0672444
ENSDARG00000025672	comp26165_c0_seq1	1.11551
ENSDARG00000018562	comp26167_c0_seq1	0.388594
ENSDARG00000079085	comp26187_c0_seq2	-0.955518
ENSDARG00000061186	comp26202_c0_seq1	0.160865
ENSDARG00000070432	comp26209_c0_seq1	1.16639
ENSDARG00000036774	comp26212_c0_seq1	0.28489
ENSDARG00000036774	comp26212_c0_seq1	0.28489
ENSDARG00000036774	comp26212_c0_seq2	0.829164
ENSDARG00000062280	comp26222_c0_seq1	-0.548253
ENSDARG00000074485	comp26228_c0_seq1	0.751436
ENSDARG00000056134	comp26234_c0_seq1	3.68234
ENSDARG00000030761	comp26240_c0_seq2	-1.06021
ENSDARG00000004158	comp26254_c0_seq1	0.234343
ENSDARG00000003153	comp26259_c0_seq1	1.54995
ENSDARG00000003153	comp26259_c0_seq2	0.054682
ENSDARG00000010280	comp26264_c0_seq2	0.400224
ENSDARG00000010280	comp26264_c0_seq3	6.66276
ENSDARG00000010280	comp26264_c0_seq4	8.71797
ENSDARG00000052697	comp26267_c0_seq2	-0.00104785
ENSDARG00000061368	comp26282_c0_seq1	1.33416
ENSDARG00000007034	comp26291_c0_seq1	0.231118
ENSDARG00000003931	comp26292_c0_seq1	1.67923
ENSDARG00000090493	comp26293_c0_seq1	-0.397687
ENSDARG00000079839	comp26294_c0_seq1	0.212837
ENSDARG00000038012	comp26304_c0_seq1	-0.837805
ENSDARG00000004635	comp26314_c0_seq1	8.55918
ENSDARG00000056119	comp26321_c0_seq1	-10.3857
ENSDARG00000029252	comp26340_c0_seq1	1.54942
ENSDARG00000037962	comp26355_c0_seq1	0.355063
ENSDARG00000028106	comp26359_c0_seq1	0.588128
ENSDARG00000077934	comp26367_c0_seq1	-0.583938
ENSDARG00000077934	comp26367_c0_seq1	-0.583938
ENSDARG00000077934	comp26367_c0_seq1	-0.583938
ENSDARG00000071863	comp26370_c0_seq1	0.484722
ENSDARG00000002656	comp26397_c0_seq2	-0.797469
ENSDARG00000058325	comp26413_c0_seq2	-0.0258328
ENSDARG00000070922	comp26418_c0_seq1	-0.478699
ENSDARG00000090493	comp26432_c0_seq1	-0.540117
ENSDARG00000058028	comp26437_c0_seq1	-0.10432
ENSDARG00000004917	comp26444_c0_seq1	-0.0973108
ENSDARG00000007098	comp26477_c0_seq1	-0.737707
ENSDARG00000090526	comp26481_c0_seq1	-1.07235
ENSDARG00000070041	comp26481_c0_seq2	-1.12187
ENSDARG00000075768	comp26494_c0_seq1	-1.17927
ENSDARG00000043359	comp26505_c0_seq1	-0.843356
ENSDARG00000043359	comp26505_c0_seq2	-0.947086
ENSDARG00000044153	comp26508_c0_seq1	-0.975983
ENSDARG00000075977	comp26525_c0_seq1	-1.07176
ENSDARG00000070109	comp26551_c0_seq1	0.706593
ENSDARG00000000103	comp26553_c0_seq1	0.523696
ENSDARG00000086201	comp26556_c0_seq1	-0.328567
ENSDARG00000061096	comp26558_c0_seq2	-2.33604
ENSDARG00000086201	comp26569_c0_seq1	-0.269734
ENSDARG00000041870	comp26598_c0_seq1	0.655271
ENSDARG00000028507	comp2660_c0_seq1	-7.17624
ENSDARG00000061845	comp26606_c0_seq2	0.738605
ENSDARG00000002369	comp26615_c0_seq1	-3.04663
ENSDARG00000087815	comp26629_c0_seq1	0.704964
ENSDARG00000002127	comp26641_c0_seq1	0.827668
ENSDARG00000021389	comp26642_c0_seq1	-0.782484
ENSDARG00000021389	comp26642_c0_seq2	-0.0161023
ENSDARG00000073953	comp26646_c0_seq1	-0.747734
ENSDARG00000011281	comp2665_c0_seq1	-0.221499
ENSDARG00000015681	comp26657_c0_seq1	0.485472
ENSDARG00000015681	comp26657_c0_seq1	0.485472
ENSDARG00000078814	comp26659_c0_seq2	-2.09177
ENSDARG00000017591	comp26665_c0_seq1	1.28546
ENSDARG00000090493	comp26682_c0_seq1	-1.19154
ENSDARG00000036811	comp26695_c0_seq1	0.962669
ENSDARG00000015985	comp26700_c0_seq1	-4.55718
ENSDARG00000015985	comp26700_c0_seq2	-2.26316
ENSDARG00000038422	comp26721_c0_seq2	0.969568
ENSDARG00000020676	comp26736_c0_seq1	0.150079
ENSDARG00000020676	comp26736_c0_seq1	0.150079
ENSDARG00000070818	comp26761_c0_seq2	-1.36054
ENSDARG00000006242	comp26766_c0_seq1	0.691731
ENSDARG00000024209	comp26794_c0_seq1	0.0376546
ENSDARG00000024209	comp26794_c0_seq1	0.0376546
ENSDARG00000024209	comp26794_c0_seq1	0.0376546
ENSDARG00000024209	comp26794_c0_seq2	0.64151
ENSDARG00000024209	comp26794_c0_seq2	0.64151
ENSDARG00000024209	comp26794_c0_seq2	0.64151
ENSDARG00000052907	comp26802_c0_seq1	2.03192
ENSDARG00000021110	comp26816_c0_seq1	1.93426
ENSDARG00000021110	comp26816_c0_seq1	1.93426
ENSDARG00000021110	comp26816_c0_seq2	0.594537
ENSDARG00000021110	comp26816_c0_seq2	0.594537
ENSDARG00000016867	comp26818_c0_seq1	-0.407667
ENSDARG00000004151	comp26820_c0_seq1	0.743212
ENSDARG00000011727	comp26856_c0_seq1	1.30227
ENSDARG00000055900	comp26867_c0_seq1	0.344166
ENSDARG00000087146	comp26868_c0_seq1	0.241072
ENSDARG00000043680	comp26885_c0_seq1	0.245678
ENSDARG00000090493	comp26921_c0_seq1	-0.345134
ENSDARG00000019004	comp26925_c0_seq1	0.2456
ENSDARG00000004706	comp26930_c0_seq1	-0.441445
ENSDARG00000011863	comp26942_c0_seq1	0.461975
ENSDARG00000009942	comp27001_c0_seq1	0.878129
ENSDARG00000057556	comp27031_c0_seq1	-13.1733
ENSDARG00000045527	comp27038_c0_seq4	0.149205
ENSDARG00000006963	comp27060_c0_seq1	0.945281
ENSDARG00000036060	comp27063_c0_seq1	0.446997
ENSDARG00000088348	comp27081_c0_seq2	-1.276
ENSDARG00000087038	comp27105_c0_seq1	-1.76475
ENSDARG00000053652	comp27108_c0_seq1	-2.06695
ENSDARG00000086495	comp27112_c0_seq1	-1.20996
ENSDARG00000006524	comp27114_c0_seq1	0.209262
ENSDARG00000038500	comp27120_c0_seq1	1.72591
ENSDARG00000061040	comp27127_c0_seq1	0.0670718
ENSDARG00000061040	comp27127_c0_seq2	0.124258
ENSDARG00000091317	comp27132_c0_seq1	-0.693534
ENSDARG00000091317	comp27132_c0_seq1	-0.693534
ENSDARG00000043970	comp27141_c0_seq1	0.537922
ENSDARG00000058693	comp27154_c0_seq1	-9.46783
ENSDARG00000023999	comp27156_c0_seq1	0.0803386
ENSDARG00000010792	comp27174_c0_seq2	0.182285
ENSDARG00000010792	comp27174_c0_seq3	9.80993
ENSDARG00000087038	comp27176_c0_seq1	-0.295215
ENSDARG00000087038	comp27176_c0_seq1	-0.295215
ENSDARG00000053956	comp27187_c0_seq1	1.08303
ENSDARG00000061117	comp27191_c0_seq3	-5.49807
ENSDARG00000005645	comp27198_c0_seq1	1.16824
ENSDARG00000005645	comp27198_c0_seq1	1.16824
ENSDARG00000055566	comp27200_c0_seq1	1.98461
ENSDARG00000030957	comp27203_c0_seq1	-0.234539
ENSDARG00000061724	comp27215_c0_seq1	1.16598
ENSDARG00000062220	comp27216_c0_seq1	-0.464893
ENSDARG00000029071	comp27218_c0_seq2	1.93773
ENSDARG00000032431	comp27250_c0_seq1	0.181378
ENSDARG00000008218	comp27254_c0_seq1	-7.99502
ENSDARG00000008218	comp27254_c0_seq1	-7.99502
ENSDARG00000008218	comp27254_c0_seq2	-0.107546
ENSDARG00000008218	comp27254_c0_seq2	-0.107546
ENSDARG00000008218	comp27254_c0_seq2	-0.107546
ENSDARG00000015460	comp27268_c0_seq1	1.89824
ENSDARG00000004958	comp27282_c0_seq1	-0.412135
ENSDARG00000061610	comp27310_c0_seq1	-0.661111
ENSDARG00000061413	comp27314_c0_seq1	0.221527
ENSDARG00000090493	comp27319_c0_seq1	-0.915957
ENSDARG00000058869	comp27329_c0_seq1	-0.805088
ENSDARG00000024759	comp27336_c0_seq1	0.911378
ENSDARG00000045485	comp27341_c0_seq1	-2.11401
ENSDARG00000045485	comp27341_c0_seq1	-2.11401
ENSDARG00000030498	comp27342_c0_seq1	3.31282
ENSDARG00000030498	comp27342_c0_seq2	2.602
ENSDARG00000032919	comp27346_c0_seq1	-1.17479
ENSDARG00000007285	comp27354_c0_seq1	1.13626
ENSDARG00000007285	comp27354_c0_seq2	1.08709
ENSDARG00000073996	comp27355_c0_seq1	-0.173272
ENSDARG00000073996	comp27355_c0_seq1	-0.173272
ENSDARG00000074933	comp27356_c0_seq1	-0.0800608
ENSDARG00000090493	comp27364_c0_seq1	-10.9341
ENSDARG00000062846	comp27365_c0_seq1	0.529372
ENSDARG00000025522	comp27374_c0_seq2	0.813851
ENSDARG00000037517	comp27389_c0_seq1	1.29446
ENSDARG00000028159	comp27403_c0_seq1	1.02067
ENSDARG00000021082	comp27404_c0_seq1	0.904387
ENSDARG00000021082	comp27404_c0_seq11	0.740792
ENSDARG00000021082	comp27404_c0_seq12	7.86411
ENSDARG00000021082	comp27404_c0_seq13	0.90382
ENSDARG00000021082	comp27404_c0_seq14	0.829648
ENSDARG00000021082	comp27404_c0_seq15	0.666456
ENSDARG00000021082	comp27404_c0_seq3	0.180742
ENSDARG00000021082	comp27404_c0_seq5	0.0149029
ENSDARG00000035400	comp27406_c0_seq1	-7.79456
ENSDARG00000009387	comp27409_c0_seq1	0.00207976
ENSDARG00000069169	comp27412_c0_seq2	1.33303
ENSDARG00000070480	comp27426_c0_seq1	-0.933068
ENSDARG00000058259	comp27428_c0_seq1	0.0533124
ENSDARG00000026630	comp27435_c0_seq1	0.0517623
ENSDARG00000069770	comp27460_c0_seq1	-1.16184
ENSDARG00000016579	comp2747_c0_seq1	-2.72288
ENSDARG00000058990	comp27483_c0_seq2	0.422135
ENSDARG00000058990	comp27483_c0_seq2	0.422135
ENSDARG00000058990	comp27483_c0_seq3	1.40056
ENSDARG00000010462	comp27497_c0_seq2	1.63474
ENSDARG00000076602	comp27511_c0_seq1	1.86593
ENSDARG00000095288	comp27522_c0_seq1	-8.32827
ENSDARG00000095288	comp27522_c0_seq2	-0.893338
ENSDARG00000005713	comp27557_c0_seq1	-0.650964
ENSDARG00000092134	comp27558_c0_seq2	0.42642
ENSDARG00000094857	comp27576_c0_seq1	-0.791688
ENSDARG00000059606	comp27593_c0_seq1	-0.312205
ENSDARG00000059606	comp27593_c0_seq3	-0.226806
ENSDARG00000026908	comp27598_c0_seq1	0.208947
ENSDARG00000058560	comp27599_c0_seq1	0.244639
ENSDARG00000058560	comp27599_c0_seq2	0.158901
ENSDARG00000012395	comp27601_c0_seq1	8.35331
ENSDARG00000089797	comp27616_c0_seq1	-1.90498
ENSDARG00000089797	comp27616_c0_seq2	-0.79321
ENSDARG00000091836	comp27617_c0_seq1	-0.0941073
ENSDARG00000060506	comp27640_c0_seq1	0.283264
ENSDARG00000060506	comp27640_c0_seq1	0.283264
ENSDARG00000077467	comp27648_c0_seq1	-2.42035
ENSDARG00000077467	comp27648_c0_seq1	-2.42035
ENSDARG00000096359	comp27656_c0_seq1	1.67837
ENSDARG00000041376	comp27657_c0_seq1	0.224115
ENSDARG00000030053	comp27663_c0_seq1	-10.9095
ENSDARG00000022139	comp27666_c0_seq1	8.04624
ENSDARG00000016181	comp27675_c0_seq2	0.285263
ENSDARG00000007461	comp27676_c0_seq1	0.99826
ENSDARG00000061994	comp27678_c0_seq1	-1.25872
ENSDARG00000019842	comp27687_c0_seq1	0.0541791
ENSDARG00000019842	comp27687_c0_seq2	1.02825
ENSDARG00000020798	comp27706_c0_seq1	1.15004
ENSDARG00000020798	comp27706_c0_seq1	1.15004
ENSDARG00000059279	comp27707_c0_seq1	0.0276425
ENSDARG00000097591	comp27709_c0_seq1	-0.618569
ENSDARG00000004757	comp27710_c0_seq1	-12.5979
ENSDARG00000004757	comp27710_c0_seq1	-12.5979
ENSDARG00000004757	comp27710_c0_seq2	-5.89826
ENSDARG00000004757	comp27710_c0_seq2	-5.89826
ENSDARG00000004757	comp27710_c0_seq3	-12.5022
ENSDARG00000004757	comp27710_c0_seq3	-12.5022
ENSDARG00000004757	comp27710_c0_seq5	-0.235625
ENSDARG00000074757	comp27713_c0_seq1	-0.301319
ENSDARG00000031164	comp27733_c0_seq1	-4.00747
ENSDARG00000012203	comp27734_c0_seq2	-0.195588
ENSDARG00000096554	comp27736_c0_seq1	2.18786
ENSDARG00000039008	comp27737_c0_seq1	-0.345175
ENSDARG00000016393	comp27739_c0_seq1	0.879461
ENSDARG00000090493	comp27746_c0_seq2	-0.638953
ENSDARG00000077709	comp27747_c0_seq1	-0.580041
ENSDARG00000077709	comp27747_c0_seq1	-0.580041
ENSDARG00000077709	comp27747_c0_seq6	-1.78232
ENSDARG00000077709	comp27747_c0_seq6	-1.78232
ENSDARG00000097473	comp27749_c0_seq1	9.50842
ENSDARG00000023028	comp27772_c0_seq1	0.184069
ENSDARG00000038802	comp27774_c0_seq1	0.374597
ENSDARG00000076005	comp27775_c0_seq1	0.247224
ENSDARG00000077318	comp27781_c0_seq1	0.846247
ENSDARG00000086495	comp27792_c0_seq1	-0.203198
ENSDARG00000020057	comp27815_c0_seq1	1.54045
ENSDARG00000020057	comp27815_c0_seq1	1.54045
ENSDARG00000029370	comp27838_c0_seq1	-1.797
ENSDARG00000029370	comp27838_c0_seq1	-1.797
ENSDARG00000029370	comp27838_c0_seq2	-0.221499
ENSDARG00000088764	comp27850_c0_seq1	-0.990581
ENSDARG00000007196	comp27854_c0_seq1	0.499227
ENSDARG00000007196	comp27854_c0_seq2	1.40351
ENSDARG00000007196	comp27854_c0_seq3	0.632737
ENSDARG00000061233	comp27859_c0_seq1	0.180408
ENSDARG00000090223	comp27860_c0_seq2	-6.48202
ENSDARG00000090223	comp27860_c0_seq2	-6.48202
ENSDARG00000090223	comp27860_c0_seq4	-0.639667
ENSDARG00000093044	comp27891_c0_seq1	-1.56119
ENSDARG00000015314	comp27904_c0_seq1	0.309654
ENSDARG00000074727	comp27906_c0_seq1	0.631188
ENSDARG00000074727	comp27906_c0_seq2	1.1082
ENSDARG00000052721	comp27913_c0_seq2	4.64686
ENSDARG00000062568	comp27918_c0_seq1	-9.08316
ENSDARG00000062568	comp27918_c0_seq2	-0.938539
ENSDARG00000086201	comp27922_c0_seq1	-0.313515
ENSDARG00000054301	comp27932_c0_seq3	8.14541
ENSDARG00000021370	comp27938_c0_seq1	0.394238
ENSDARG00000021370	comp27938_c0_seq2	1.40809
ENSDARG00000054903	comp27946_c0_seq2	5.01568
ENSDARG00000011769	comp27949_c0_seq1	0.115861
ENSDARG00000011769	comp27949_c0_seq1	0.115861
ENSDARG00000094181	comp27950_c0_seq1	-1.15713
ENSDARG00000079268	comp27954_c0_seq1	1.27131
ENSDARG00000079268	comp27954_c0_seq1	1.27131
ENSDARG00000077717	comp27959_c0_seq1	-7.67764
ENSDARG00000005567	comp27960_c0_seq1	-0.370167
ENSDARG00000022350	comp27970_c0_seq1	0.662172
ENSDARG00000043011	comp27987_c0_seq1	0.0189483
ENSDARG00000020079	comp27992_c0_seq1	1.20293
ENSDARG00000021120	comp27998_c0_seq1	1.14064
ENSDARG00000090493	comp28008_c0_seq1	-0.0795486
ENSDARG00000037966	comp28012_c0_seq1	0.0149192
ENSDARG00000057698	comp28017_c0_seq1	0.242411
ENSDARG00000063631	comp28034_c0_seq1	-2.75488
ENSDARG00000063631	comp28034_c0_seq1	-2.75488
ENSDARG00000061335	comp28052_c0_seq1	0.369025
ENSDARG00000056704	comp2806_c0_seq1	-1.50545
ENSDARG00000042031	comp28065_c0_seq1	0.917072
ENSDARG00000063636	comp28073_c0_seq1	0.647577
ENSDARG00000056619	comp28088_c0_seq1	0.726184
ENSDARG00000056619	comp28088_c0_seq2	0.179609
ENSDARG00000092360	comp28094_c0_seq1	6.36649
ENSDARG00000004870	comp28095_c0_seq1	0.342602
ENSDARG00000086495	comp28104_c0_seq1	-0.231114
ENSDARG00000073779	comp28109_c0_seq1	0.156818
ENSDARG00000073779	comp28109_c0_seq2	0.229329
ENSDARG00000073779	comp28109_c0_seq2	0.229329
ENSDARG00000004018	comp28110_c0_seq1	0.956531
ENSDARG00000052606	comp28119_c0_seq1	0.258425
ENSDARG00000052606	comp28119_c0_seq1	0.258425
ENSDARG00000058650	comp28136_c0_seq1	1.00152
ENSDARG00000052942	comp28151_c0_seq1	1.90036
ENSDARG00000034146	comp28157_c0_seq1	0.620825
ENSDARG00000058337	comp28159_c0_seq1	0.178175
ENSDARG00000043009	comp28171_c0_seq1	-0.413689
ENSDARG00000087804	comp28172_c0_seq1	1.36146
ENSDARG00000042151	comp28176_c0_seq1	0.0459122
ENSDARG00000019746	comp28202_c0_seq1	-0.418832
ENSDARG00000019746	comp28202_c0_seq2	-0.745361
ENSDARG00000037517	comp28211_c0_seq1	1.19252
ENSDARG00000045485	comp28218_c0_seq1	-1.35874
ENSDARG00000015865	comp28229_c0_seq1	-1.19998
ENSDARG00000061385	comp28232_c0_seq1	0.637011
ENSDARG00000069147	comp28244_c0_seq1	-0.37727
ENSDARG00000075919	comp28246_c0_seq1	-2.46783
ENSDARG00000075919	comp28246_c0_seq1	-2.46783
ENSDARG00000042236	comp28249_c0_seq1	1.02212
ENSDARG00000058693	comp28255_c0_seq1	-9.32602
ENSDARG00000058693	comp28255_c0_seq3	-8.99219
ENSDARG00000015902	comp28259_c0_seq3	-2.26782
ENSDARG00000040881	comp28262_c0_seq1	0.10622
ENSDARG00000021255	comp28265_c0_seq3	1.25132
ENSDARG00000041708	comp28273_c0_seq2	0.208339
ENSDARG00000041708	comp28273_c0_seq3	1.39797
ENSDARG00000074410	comp28276_c0_seq1	0.361308
ENSDARG00000035505	comp28281_c0_seq1	0.166552
ENSDARG00000008937	comp28283_c0_seq1	0.523334
ENSDARG00000008937	comp28283_c0_seq2	0.764281
ENSDARG00000079124	comp28288_c0_seq1	-0.634173
ENSDARG00000055540	comp28303_c0_seq2	-0.43012
ENSDARG00000030110	comp28320_c0_seq2	-6.65512
ENSDARG00000079470	comp28322_c0_seq2	0.797617
ENSDARG00000015887	comp28337_c0_seq1	-11.2412
ENSDARG00000008503	comp28340_c0_seq1	-0.0431992
ENSDARG00000032725	comp28345_c0_seq1	-3.67076
ENSDARG00000007034	comp28353_c0_seq4	0.690205
ENSDARG00000028435	comp28354_c0_seq1	-9.16874
ENSDARG00000028435	comp28354_c0_seq2	-1.01607
ENSDARG00000011405	comp28388_c0_seq1	-1.02079
ENSDARG00000035660	comp28389_c0_seq1	-0.370603
ENSDARG00000032630	comp28391_c0_seq1	-2.82817
ENSDARG00000032630	comp28391_c0_seq2	-11.6058
ENSDARG00000032630	comp28391_c0_seq3	-2.287
ENSDARG00000057323	comp28414_c0_seq1	1.71892
ENSDARG00000016307	comp28419_c0_seq1	0.0441155
ENSDARG00000075682	comp28421_c0_seq1	1.00566
ENSDARG00000025467	comp28422_c0_seq1	0.328009
ENSDARG00000097803	comp28424_c0_seq1	0.0852844
ENSDARG00000037872	comp28448_c0_seq1	-0.756244
ENSDARG00000057368	comp28450_c0_seq1	-12.0092
ENSDARG00000034897	comp28452_c0_seq1	-1.00725
ENSDARG00000046119	comp28458_c0_seq1	-1.26847
ENSDARG00000043453	comp28465_c0_seq1	-1.28964
ENSDARG00000078781	comp28495_c0_seq2	-0.785489
ENSDARG00000002787	comp28496_c0_seq1	0.389706
ENSDARG00000037100	comp28523_c0_seq2	1.41986
ENSDARG00000037100	comp28523_c0_seq2	1.41986
ENSDARG00000037100	comp28523_c0_seq3	2.08934
ENSDARG00000037100	comp28523_c0_seq4	1.33694
ENSDARG00000052565	comp28554_c0_seq1	1.01847
ENSDARG00000046106	comp28563_c0_seq1	0.874984
ENSDARG00000012271	comp28564_c0_seq1	0.875687
ENSDARG00000086201	comp28566_c0_seq1	-2.50671
ENSDARG00000041337	comp28583_c0_seq1	0.581306
ENSDARG00000022833	comp28589_c0_seq1	-0.424567
ENSDARG00000087038	comp2859_c0_seq1	-1.50545
ENSDARG00000003681	comp28594_c0_seq1	0.398324
ENSDARG00000002391	comp28611_c0_seq1	-0.636999
ENSDARG00000075354	comp28624_c0_seq1	1.89869
ENSDARG00000075172	comp28629_c0_seq3	-0.688174
ENSDARG00000022599	comp28634_c0_seq1	-1.206
ENSDARG00000037954	comp28648_c0_seq1	-5.17428
ENSDARG00000037954	comp28648_c0_seq2	-5.57243
ENSDARG00000058470	comp28656_c0_seq1	-0.347295
ENSDARG00000033138	comp28661_c0_seq1	-0.164509
ENSDARG00000005541	comp28669_c0_seq1	-0.996554
ENSDARG00000014329	comp28682_c0_seq1	0.427959
ENSDARG00000054771	comp28692_c0_seq1	-2.28155
ENSDARG00000016345	comp28694_c0_seq2	-0.00510972
ENSDARG00000035632	comp28695_c0_seq1	-3.14007
ENSDARG00000096359	comp28704_c0_seq1	3.39195
ENSDARG00000039671	comp28708_c0_seq2	1.55778
ENSDARG00000019156	comp28710_c0_seq1	0.278455
ENSDARG00000013379	comp28712_c0_seq1	6.74939
ENSDARG00000013379	comp28712_c0_seq1	6.74939
ENSDARG00000013379	comp28712_c0_seq2	0.160884
ENSDARG00000013379	comp28712_c0_seq2	0.160884
ENSDARG00000013379	comp28712_c0_seq4	0.404296
ENSDARG00000013379	comp28712_c0_seq4	0.404296
ENSDARG00000013379	comp28712_c0_seq6	7.35772
ENSDARG00000013379	comp28712_c0_seq6	7.35772
ENSDARG00000092903	comp28715_c0_seq2	-11.1318
ENSDARG00000038467	comp28719_c0_seq1	2.73034
ENSDARG00000030161	comp28722_c0_seq1	0.625109
ENSDARG00000077383	comp28724_c0_seq1	-9.63753
ENSDARG00000021979	comp28728_c0_seq2	9.47067
ENSDARG00000021979	comp28728_c0_seq3	7.30149
ENSDARG00000086411	comp28732_c0_seq1	0.969948
ENSDARG00000024651	comp28734_c0_seq1	0.32564
ENSDARG00000024651	comp28734_c0_seq2	1.16699
ENSDARG00000073721	comp28739_c0_seq2	1.24516
ENSDARG00000052688	comp28757_c0_seq1	-3.62395
ENSDARG00000052688	comp28757_c0_seq2	-0.137954
ENSDARG00000074245	comp28760_c0_seq1	-0.574392
ENSDARG00000074245	comp28760_c0_seq2	-0.199375
ENSDARG00000004796	comp28763_c0_seq3	1.64166
ENSDARG00000086495	comp28770_c0_seq1	-4.49131
ENSDARG00000073710	comp28776_c0_seq1	0.695374
ENSDARG00000073710	comp28776_c0_seq2	0.597373
ENSDARG00000007278	comp28784_c0_seq1	2.63206
ENSDARG00000080010	comp28827_c0_seq1	-0.299606
ENSDARG00000024669	comp28832_c0_seq4	-0.950961
ENSDARG00000025846	comp28836_c0_seq2	-0.377626
ENSDARG00000025846	comp28836_c0_seq2	-0.377626
ENSDARG00000025846	comp28836_c0_seq2	-0.377626
ENSDARG00000025846	comp28836_c0_seq2	-0.377626
ENSDARG00000019644	comp28845_c0_seq1	-2.44374
ENSDARG00000020509	comp28847_c0_seq3	-1.39216
ENSDARG00000086495	comp28853_c0_seq1	-0.266195
ENSDARG00000018618	comp28868_c0_seq1	0.561921
ENSDARG00000041464	comp28877_c0_seq2	0.209216
ENSDARG00000063417	comp28883_c0_seq1	0.677993
ENSDARG00000038141	comp28891_c0_seq1	-0.582688
ENSDARG00000069706	comp28892_c0_seq1	0.585772
ENSDARG00000037961	comp28893_c0_seq1	0.501267
ENSDARG00000037961	comp28893_c0_seq1	0.501267
ENSDARG00000037961	comp28893_c0_seq1	0.501267
ENSDARG00000018985	comp28897_c0_seq1	-0.826821
ENSDARG00000078448	comp28901_c0_seq1	1.09418
ENSDARG00000089208	comp28921_c0_seq1	-0.124553
ENSDARG00000013780	comp28923_c0_seq1	0.221673
ENSDARG00000013780	comp28923_c0_seq1	0.221673
ENSDARG00000013780	comp28923_c0_seq2	2.17614
ENSDARG00000090493	comp28930_c0_seq1	-2.35673
ENSDARG00000090493	comp28930_c0_seq2	-0.194399
ENSDARG00000076116	comp28931_c0_seq1	0.571376
ENSDARG00000076116	comp28931_c0_seq2	0.257485
ENSDARG00000079756	comp28935_c0_seq3	0.00577528
ENSDARG00000032237	comp28936_c0_seq1	1.01333
ENSDARG00000039335	comp28950_c0_seq1	9.04351
ENSDARG00000039335	comp28950_c0_seq2	7.24297
ENSDARG00000010070	comp28956_c0_seq2	2.35564
ENSDARG00000055133	comp28957_c0_seq1	3.89569
ENSDARG00000079504	comp28960_c0_seq1	-0.160458
ENSDARG00000079504	comp28960_c0_seq2	-0.0987108
ENSDARG00000006422	comp28972_c0_seq1	-0.561049
ENSDARG00000063588	comp28976_c0_seq1	0.888581
ENSDARG00000063588	comp28976_c0_seq1	0.888581
ENSDARG00000029372	comp28982_c0_seq1	1.28914
ENSDARG00000045482	comp28984_c0_seq2	-6.80072
ENSDARG00000090493	comp29003_c0_seq1	-0.39998
ENSDARG00000060169	comp29007_c0_seq1	0.619315
ENSDARG00000076486	comp29023_c0_seq1	0.14045
ENSDARG00000076486	comp29023_c0_seq2	0.662916
ENSDARG00000043944	comp29027_c0_seq1	-0.855333
ENSDARG00000070774	comp29033_c0_seq2	-0.12362
ENSDARG00000067601	comp29044_c0_seq1	0.530493
ENSDARG00000067601	comp29044_c0_seq1	0.530493
[truncated: 7,871 more rows]
