# Supplementary material for: A Conserved MicroRNA Regulatory Circuit Is Differentially Controlled during Limb/Appendage Regeneration
Source: PLoS One. 2016 Jun 29;11(6):e0157106. doi: 10.1371/journal.pone.0157106 (PMC4927183; doi:10.1371/journal.pone.0157106)
Supplement: S16 Table — Common upregulated mRNAs shown as a mapping between axolotl transcripts and zebrafish genes. Fold-changes are shown for axolotl along with zebrafish fold change, statistics, gene symbol and description. (XLSX) [file pone.0157106.s020.xlsx]

## Sheet: Sheet1
S16 Table: Common upregulated mRNAs during zebrafish and axolotl limb/appendage regeneration.
Axolotl Transcript ID	Axolotl Fold Change (0dpa vs. 6dpa)	Zebrafish Ensembl Gene ID	Zebrafish Fold Change (0dpa vs. 4dpa)	Zebrafish_logCPM	Zebrafish_LR	Zebrafish_PValue	Zebrafish_FDR	Zebrafish_Chromosome.Name	Zebrafish_Gene.Start..bp.	Zebrafish_Gene.End..bp.	Zebrafish_Associated.Gene.Name	Zebrafish_Description
comp38280_c0_seq1	0.714503	ENSDARG00000000002	6.18045	2.62771	5.25827	121.325	3.2438e-28	8.8544e-27	9	35060460	35084513	ccdc80	coiled-coil domain containing 80 [Source:ZFIN;Acc:ZDB-GENE-030616-56]
comp38280_c0_seq1	0.714503	ENSDARG00000000002	6.18045	2.62771	5.25827	121.325	3.2438e-28	8.8544e-27	9	35060460	35084513	ccdc80	coiled-coil domain containing 80 [Source:ZFIN;Acc:ZDB-GENE-030616-56]
comp41624_c0_seq1	0.233364	ENSDARG00000000069	1.46358	0.549498	6.11552	26.5936	2.51079e-07	9.49371e-07	24	22678238	22711533	dap	death associated protein [Source:ZFIN;Acc:ZDB-GENE-000511-3]
comp11706_c0_seq1	0.443423	ENSDARG00000000103	1.34134	0.423676	5.52436	6.52393	0.0106433	0.0186706	6	7469900	7575100	myh10	myosin, heavy chain 10, non-muscle [Source:ZFIN;Acc:ZDB-GENE-030616-162]
comp26553_c0_seq1	0.523696	ENSDARG00000000103	1.34134	0.423676	5.52436	6.52393	0.0106433	0.0186706	6	7469900	7575100	myh10	myosin, heavy chain 10, non-muscle [Source:ZFIN;Acc:ZDB-GENE-030616-162]
comp37927_c0_seq1	0.756698	ENSDARG00000000103	1.34134	0.423676	5.52436	6.52393	0.0106433	0.0186706	6	7469900	7575100	myh10	myosin, heavy chain 10, non-muscle [Source:ZFIN;Acc:ZDB-GENE-030616-162]
comp64012_c0_seq1	0.180742	ENSDARG00000000103	1.34134	0.423676	5.52436	6.52393	0.0106433	0.0186706	6	7469900	7575100	myh10	myosin, heavy chain 10, non-muscle [Source:ZFIN;Acc:ZDB-GENE-030616-162]
comp80680_c0_seq1	1.59901	ENSDARG00000000103	1.34134	0.423676	5.52436	6.52393	0.0106433	0.0186706	6	7469900	7575100	myh10	myosin, heavy chain 10, non-muscle [Source:ZFIN;Acc:ZDB-GENE-030616-162]
comp41116_c0_seq2	12.502	ENSDARG00000000241	1.26376	0.337728	4.2621	4.83396	0.0279045	0.0447247	9	42176170	42186921	slc40a1	solute carrier family 40 (iron-regulated transporter), member 1 [Source:ZFIN;Acc:ZDB-GENE-000511-8]
comp61637_c0_seq1	0.0562995	ENSDARG00000000349	1.60968	0.686776	0.035644	4.66841	0.0307223	0.0488047	21	21943482	21947697	C21H11orf70	chromosome 11 open reading frame 70 [Source:HGNC Symbol;Acc:HGNC:28188]
comp63811_c0_seq1	0.750086	ENSDARG00000000349	1.60968	0.686776	0.035644	4.66841	0.0307223	0.0488047	21	21943482	21947697	C21H11orf70	chromosome 11 open reading frame 70 [Source:HGNC Symbol;Acc:HGNC:28188]
comp13733_c0_seq1	1.15883	ENSDARG00000000760	1.73859	0.79792	3.11815	15.6594	7.58367e-05	0.00019572	13	24889141	24893148	znf511	zinc finger protein 511 [Source:ZFIN;Acc:ZDB-GENE-030616-621]
comp34871_c0_seq1	3.05604	ENSDARG00000000767	1.78341	0.834641	4.44839	33.2387	8.15125e-09	3.73437e-08	7	33979183	33993855	spi1b	spleen focus forming virus (SFFV) proviral integration oncogene spi1b [Source:ZFIN;Acc:ZDB-GENE-980526-164]
comp40016_c0_seq1	1.16333	ENSDARG00000000767	1.78341	0.834641	4.44839	33.2387	8.15125e-09	3.73437e-08	7	33979183	33993855	spi1b	spleen focus forming virus (SFFV) proviral integration oncogene spi1b [Source:ZFIN;Acc:ZDB-GENE-980526-164]
comp40016_c0_seq10	12.2763	ENSDARG00000000767	1.78341	0.834641	4.44839	33.2387	8.15125e-09	3.73437e-08	7	33979183	33993855	spi1b	spleen focus forming virus (SFFV) proviral integration oncogene spi1b [Source:ZFIN;Acc:ZDB-GENE-980526-164]
comp40016_c0_seq7	8.89941	ENSDARG00000000767	1.78341	0.834641	4.44839	33.2387	8.15125e-09	3.73437e-08	7	33979183	33993855	spi1b	spleen focus forming virus (SFFV) proviral integration oncogene spi1b [Source:ZFIN;Acc:ZDB-GENE-980526-164]
comp36075_c0_seq1	0.545753	ENSDARG00000001014	1.44972	0.535776	8.12407	9.92368	0.00163166	0.00333	3	5725973	5826325	myh9b	myosin, heavy polypeptide 9b, non-muscle [Source:ZFIN;Acc:ZDB-GENE-030131-998]
comp46257_c0_seq1	1.90377	ENSDARG00000001129	1.28486	0.361611	4.25953	7.09385	0.00773489	0.0139143	17	19250142	19293508	dicer1	Dicer1, Dcr-1 homolog (Drosophila) [Source:ZFIN;Acc:ZDB-GENE-030131-3445]
comp6545_c0_seq1	1.45813	ENSDARG00000001129	1.28486	0.361611	4.25953	7.09385	0.00773489	0.0139143	17	19250142	19293508	dicer1	Dicer1, Dcr-1 homolog (Drosophila) [Source:ZFIN;Acc:ZDB-GENE-030131-3445]
comp7713_c0_seq1	1.43579	ENSDARG00000001129	1.28486	0.361611	4.25953	7.09385	0.00773489	0.0139143	17	19250142	19293508	dicer1	Dicer1, Dcr-1 homolog (Drosophila) [Source:ZFIN;Acc:ZDB-GENE-030131-3445]
comp24596_c0_seq1	0.283974	ENSDARG00000001210	1.38426	0.469118	4.84852	13.7383	0.00021012	0.00050434	7	33959194	33963968	arl14ep	ADP-ribosylation factor-like 14 effector protein [Source:ZFIN;Acc:ZDB-GENE-060825-216]
comp24596_c0_seq2	3.21901	ENSDARG00000001210	1.38426	0.469118	4.84852	13.7383	0.00021012	0.00050434	7	33959194	33963968	arl14ep	ADP-ribosylation factor-like 14 effector protein [Source:ZFIN;Acc:ZDB-GENE-060825-216]
comp15594_c0_seq1	1.79491	ENSDARG00000001285	1.62682	0.702051	4.06794	24.0718	9.28098e-07	3.22712e-06	7	7835606	7853891	rbm14b	RNA binding motif protein 14b [Source:ZFIN;Acc:ZDB-GENE-040426-2455]
comp36988_c0_seq1	9.90735	ENSDARG00000001313	5.34556	2.41834	3.50834	214.244	1.629e-48	1.3276e-46	17	28857835	28870857	g2e3	G2/M-phase specific E3 ubiquitin ligase [Source:ZFIN;Acc:ZDB-GENE-030616-400]
comp33852_c0_seq1	0.4915	ENSDARG00000001442	2.65473	1.40857	3.88196	73.9539	7.9962e-18	9.2459e-17	14	33619348	33650873	inppl1b	inositol polyphosphate phosphatase-like 1b [Source:ZFIN;Acc:ZDB-GENE-030616-75]
comp33852_c0_seq1	0.4915	ENSDARG00000001442	2.65473	1.40857	3.88196	73.9539	7.9962e-18	9.2459e-17	14	33619348	33650873	inppl1b	inositol polyphosphate phosphatase-like 1b [Source:ZFIN;Acc:ZDB-GENE-030616-75]
comp41779_c0_seq1	2.04257	ENSDARG00000001558	3.38373	1.75861	4.66551	106.575	5.5157e-25	1.219e-23	19	7613506	7623139	kifc1	kinesin family member C1 [Source:ZFIN;Acc:ZDB-GENE-000208-21]
comp37909_c0_seq2	0.475759	ENSDARG00000001729	1.26293	0.33678	6.2724	10.1551	0.00143904	0.00296917	17	28766056	28802090	strn3	striatin, calmodulin binding protein 3 [Source:ZFIN;Acc:ZDB-GENE-030616-405]
comp30586_c0_seq1	0.623125	ENSDARG00000001754	1.41138	0.497107	5.29495	11.4479	0.00071574	0.00155744	23	23420272	23473559	noc2l	nucleolar complex associated 2 homolog (S. cerevisiae) [Source:ZFIN;Acc:ZDB-GENE-000607-75]
comp30586_c0_seq1	0.623125	ENSDARG00000001754	1.41138	0.497107	5.29495	11.4479	0.00071574	0.00155744	23	23420272	23473559	noc2l	nucleolar complex associated 2 homolog (S. cerevisiae) [Source:ZFIN;Acc:ZDB-GENE-000607-75]
comp30586_c0_seq1	0.623125	ENSDARG00000001754	1.41138	0.497107	5.29495	11.4479	0.00071574	0.00155744	23	23420272	23473559	noc2l	nucleolar complex associated 2 homolog (S. cerevisiae) [Source:ZFIN;Acc:ZDB-GENE-000607-75]
comp31116_c0_seq1	0.377643	ENSDARG00000001777	1.55774	0.639452	4.34897	15.8184	6.972e-05	0.00018098	10	1623968	1663150	nup155	nucleoporin 155 [Source:ZFIN;Acc:ZDB-GENE-040426-711]
comp34092_c0_seq1	0.643418	ENSDARG00000001873	2.09268	1.06535	6.0448	52.0246	5.4809e-13	4.015e-12	9	49173471	49201751	phgdh	phosphoglycerate dehydrogenase [Source:ZFIN;Acc:ZDB-GENE-030131-647]
comp26127_c0_seq2	0.716355	ENSDARG00000001889	3.54673	1.82649	4.30617	82.8408	8.8934e-20	1.2337e-18	23	35760274	35762942	tuba1a	tubulin, alpha 1a [Source:ZFIN;Acc:ZDB-GENE-090507-4]
comp36263_c0_seq1	0.134791	ENSDARG00000001890	1.68472	0.752512	6.87717	26.8173	2.23624e-07	8.49159e-07	16	42052001	42144277	stt3b	STT3, subunit of the oligosaccharyltransferase complex, homolog B (S. cerevisiae) [Source:ZFIN;Acc:ZDB-GENE-030131-2638]
comp15068_c0_seq1	0.436482	ENSDARG00000001940	1.49612	0.581226	6.53585	26.3466	2.85324e-07	1.07098e-06	2	20970998	20978561	dnajc1	DnaJ (Hsp40) homolog, subfamily C, member 1 [Source:ZFIN;Acc:ZDB-GENE-061103-529]
comp9243_c0_seq1	0.232036	ENSDARG00000002215	2.79913	1.48498	5.34614	122.411	1.8762e-28	5.2052e-27	22	16497252	16506149	rtca	RNA 3'-terminal phosphate cyclase [Source:ZFIN;Acc:ZDB-GENE-030131-9687]
comp35160_c0_seq1	0.566061	ENSDARG00000002285	1.26363	0.337574	4.24703	7.24638	0.0071044	0.0128551	1	46142380	46171267	mcoln1a	mucolipin 1a [Source:ZFIN;Acc:ZDB-GENE-040426-2704]
comp44637_c0_seq1	4.01686	ENSDARG00000002285	1.26363	0.337574	4.24703	7.24638	0.0071044	0.0128551	1	46142380	46171267	mcoln1a	mucolipin 1a [Source:ZFIN;Acc:ZDB-GENE-040426-2704]
comp6899_c0_seq1	0.399798	ENSDARG00000002285	1.26363	0.337574	4.24703	7.24638	0.0071044	0.0128551	1	46142380	46171267	mcoln1a	mucolipin 1a [Source:ZFIN;Acc:ZDB-GENE-040426-2704]
comp35318_c0_seq1	0.395351	ENSDARG00000002303	1.75519	0.811624	5.5314	39.7735	2.8518e-10	1.55588e-09	4	356400	383176	xpot	exportin, tRNA (nuclear export receptor for tRNAs) [Source:ZFIN;Acc:ZDB-GENE-041210-4]
comp35318_c0_seq2	0.220278	ENSDARG00000002303	1.75519	0.811624	5.5314	39.7735	2.8518e-10	1.55588e-09	4	356400	383176	xpot	exportin, tRNA (nuclear export receptor for tRNAs) [Source:ZFIN;Acc:ZDB-GENE-041210-4]
comp35318_c0_seq3	2.20785	ENSDARG00000002303	1.75519	0.811624	5.5314	39.7735	2.8518e-10	1.55588e-09	4	356400	383176	xpot	exportin, tRNA (nuclear export receptor for tRNAs) [Source:ZFIN;Acc:ZDB-GENE-041210-4]
comp35318_c0_seq4	2.53786	ENSDARG00000002303	1.75519	0.811624	5.5314	39.7735	2.8518e-10	1.55588e-09	4	356400	383176	xpot	exportin, tRNA (nuclear export receptor for tRNAs) [Source:ZFIN;Acc:ZDB-GENE-041210-4]
comp33169_c0_seq1	0.559079	ENSDARG00000002304	2.16943	1.11732	2.82382	34.0735	5.30695e-09	2.48366e-08	18	30425308	30443767	gins2	GINS complex subunit 2 [Source:ZFIN;Acc:ZDB-GENE-050419-19]
comp33169_c0_seq2	1.84483	ENSDARG00000002304	2.16943	1.11732	2.82382	34.0735	5.30695e-09	2.48366e-08	18	30425308	30443767	gins2	GINS complex subunit 2 [Source:ZFIN;Acc:ZDB-GENE-050419-19]
comp5482_c0_seq1	0.651333	ENSDARG00000002305	1.45483	0.540855	6.06132	12.323	0.0004474	0.0010143	9	35217688	35231518	me3	malic enzyme 3, NADP(+)-dependent, mitochondrial [Source:ZFIN;Acc:ZDB-GENE-041111-294]
comp57193_c0_seq1	1.14729	ENSDARG00000002332	2.4578	1.29737	4.35006	105.223	1.0916e-24	2.3512e-23	13	37359952	37395059	frmd6	FERM domain containing 6 [Source:ZFIN;Acc:ZDB-GENE-050522-354]
comp69507_c0_seq1	0.74162	ENSDARG00000002332	2.4578	1.29737	4.35006	105.223	1.0916e-24	2.3512e-23	13	37359952	37395059	frmd6	FERM domain containing 6 [Source:ZFIN;Acc:ZDB-GENE-050522-354]
comp37557_c0_seq1	1.31322	ENSDARG00000002403	2.99902	1.58449	4.46817	97.5764	5.1817e-23	9.5578e-22	13	33475323	33480269	nusap1	nucleolar and spindle associated protein 1 [Source:ZFIN;Acc:ZDB-GENE-030827-5]
comp37557_c0_seq2	10.5919	ENSDARG00000002403	2.99902	1.58449	4.46817	97.5764	5.1817e-23	9.5578e-22	13	33475323	33480269	nusap1	nucleolar and spindle associated protein 1 [Source:ZFIN;Acc:ZDB-GENE-030827-5]
comp40276_c0_seq1	4.41295	ENSDARG00000002445	31.877	4.99445	4.8649	786.637	4.339e-173	1.839e-169	16	8650398	8662788	prdm1a	PR domain containing 1a, with ZNF domain [Source:ZFIN;Acc:ZDB-GENE-030131-2193]
comp40276_c0_seq2	11.5914	ENSDARG00000002445	31.877	4.99445	4.8649	786.637	4.339e-173	1.839e-169	16	8650398	8662788	prdm1a	PR domain containing 1a, with ZNF domain [Source:ZFIN;Acc:ZDB-GENE-030131-2193]
comp24638_c0_seq1	3.61517	ENSDARG00000002479	1.9543	0.966649	4.82747	31.7158	1.78462e-08	7.82088e-08	5	25582520	25595454	ercc6l	excision repair cross-complementing rodent repair deficiency, complementation group 6-like [Source:ZFIN;Acc:ZDB-GENE-060531-56]
comp24638_c0_seq1	3.61517	ENSDARG00000002479	1.9543	0.966649	4.82747	31.7158	1.78462e-08	7.82088e-08	5	25582520	25595454	ercc6l	excision repair cross-complementing rodent repair deficiency, complementation group 6-like [Source:ZFIN;Acc:ZDB-GENE-060531-56]
comp31602_c0_seq1	0.327949	ENSDARG00000002506	2.02162	1.01551	5.59583	50.0043	1.5341e-12	1.0666e-11	7	44602709	44610814	C7H16orf87	chromosome 16 open reading frame 87 [Source:HGNC Symbol;Acc:HGNC:33754]
comp36859_c0_seq1	0.674137	ENSDARG00000002591	1.58227	0.661992	5.74177	25.3079	4.88714e-07	1.7705e-06	6	40763499	40771896	ruvbl1	RuvB-like 1 (E. coli) [Source:ZFIN;Acc:ZDB-GENE-030109-2]
comp14513_c0_seq1	2.2446	ENSDARG00000002607	1.66653	0.736847	2.48414	15.9958	6.34845e-05	0.00016597	11	27409952	27498767
comp54113_c0_seq1	1.73747	ENSDARG00000002607	1.66653	0.736847	2.48414	15.9958	6.34845e-05	0.00016597	11	27409952	27498767
comp64455_c0_seq1	1.14729	ENSDARG00000002607	1.66653	0.736847	2.48414	15.9958	6.34845e-05	0.00016597	11	27409952	27498767
comp9318_c0_seq1	2.30146	ENSDARG00000002607	1.66653	0.736847	2.48414	15.9958	6.34845e-05	0.00016597	11	27409952	27498767
comp25463_c0_seq1	0.442203	ENSDARG00000002613	1.94674	0.961064	4.54663	42.2465	8.0463e-11	4.6535e-10	19	25950690	25952850	rpa3	replication protein A3 [Source:ZFIN;Acc:ZDB-GENE-040426-977]
comp37943_c0_seq1	11.9662	ENSDARG00000002642	2.5837	1.36944	4.54529	101.048	8.9761e-24	1.7859e-22	8	19367223	19404850	sh3gl1b	SH3-domain GRB2-like 1b [Source:ZFIN;Acc:ZDB-GENE-031001-6]
comp33327_c0_seq1	0.616256	ENSDARG00000002659	2.14478	1.10083	7.69599	69.9709	6.0184e-17	6.3722e-16	23	9901568	9914536	mapre1b	microtubule-associated protein, RP/EB family, member 1b [Source:ZFIN;Acc:ZDB-GENE-040426-2256]
comp37770_c0_seq1	0.321695	ENSDARG00000002720	1.38242	0.467197	4.01275	9.16301	0.00246956	0.00487839	18	6123286	6142697	utp15	utp15, U3 small nucleolar ribonucleoprotein, homolog [Source:ZFIN;Acc:ZDB-GENE-030131-3831]
comp38320_c0_seq1	1.15602	ENSDARG00000002877	1.62985	0.704736	4.80039	24.8724	6.12526e-07	2.18312e-06	20	39247944	39284589	reps1	RALBP1 associated Eps domain containing 1 [Source:ZFIN;Acc:ZDB-GENE-030131-9536]
comp30122_c0_seq1	0.141433	ENSDARG00000002952	2.05683	1.04042	5.20076	63.1014	1.9633e-15	1.8206e-14	4	14036631	14045329	smo	smoothened homolog (Drosophila) [Source:ZFIN;Acc:ZDB-GENE-980526-89]
comp37453_c0_seq1	2.16088	ENSDARG00000003061	7.40968	2.88941	6.68704	352.077	1.4954e-78	3.4256e-76	18	49297702	49378271	cd276	CD276 molecule [Source:ZFIN;Acc:ZDB-GENE-070112-452]
comp37453_c0_seq1	2.16088	ENSDARG00000003061	7.40968	2.88941	6.68704	352.077	1.4954e-78	3.4256e-76	18	49297702	49378271	cd276	CD276 molecule [Source:ZFIN;Acc:ZDB-GENE-070112-452]
comp37453_c0_seq10	4.45545	ENSDARG00000003061	7.40968	2.88941	6.68704	352.077	1.4954e-78	3.4256e-76	18	49297702	49378271	cd276	CD276 molecule [Source:ZFIN;Acc:ZDB-GENE-070112-452]
comp37453_c0_seq10	4.45545	ENSDARG00000003061	7.40968	2.88941	6.68704	352.077	1.4954e-78	3.4256e-76	18	49297702	49378271	cd276	CD276 molecule [Source:ZFIN;Acc:ZDB-GENE-070112-452]
comp37453_c0_seq13	0.741048	ENSDARG00000003061	7.40968	2.88941	6.68704	352.077	1.4954e-78	3.4256e-76	18	49297702	49378271	cd276	CD276 molecule [Source:ZFIN;Acc:ZDB-GENE-070112-452]
comp37453_c0_seq13	0.741048	ENSDARG00000003061	7.40968	2.88941	6.68704	352.077	1.4954e-78	3.4256e-76	18	49297702	49378271	cd276	CD276 molecule [Source:ZFIN;Acc:ZDB-GENE-070112-452]
comp37453_c0_seq15	4.61714	ENSDARG00000003061	7.40968	2.88941	6.68704	352.077	1.4954e-78	3.4256e-76	18	49297702	49378271	cd276	CD276 molecule [Source:ZFIN;Acc:ZDB-GENE-070112-452]
comp37453_c0_seq15	4.61714	ENSDARG00000003061	7.40968	2.88941	6.68704	352.077	1.4954e-78	3.4256e-76	18	49297702	49378271	cd276	CD276 molecule [Source:ZFIN;Acc:ZDB-GENE-070112-452]
comp37453_c0_seq2	0.175216	ENSDARG00000003061	7.40968	2.88941	6.68704	352.077	1.4954e-78	3.4256e-76	18	49297702	49378271	cd276	CD276 molecule [Source:ZFIN;Acc:ZDB-GENE-070112-452]
comp37453_c0_seq2	0.175216	ENSDARG00000003061	7.40968	2.88941	6.68704	352.077	1.4954e-78	3.4256e-76	18	49297702	49378271	cd276	CD276 molecule [Source:ZFIN;Acc:ZDB-GENE-070112-452]
comp37453_c0_seq3	1.31408	ENSDARG00000003061	7.40968	2.88941	6.68704	352.077	1.4954e-78	3.4256e-76	18	49297702	49378271	cd276	CD276 molecule [Source:ZFIN;Acc:ZDB-GENE-070112-452]
comp37453_c0_seq3	1.31408	ENSDARG00000003061	7.40968	2.88941	6.68704	352.077	1.4954e-78	3.4256e-76	18	49297702	49378271	cd276	CD276 molecule [Source:ZFIN;Acc:ZDB-GENE-070112-452]
comp37453_c0_seq5	1.23276	ENSDARG00000003061	7.40968	2.88941	6.68704	352.077	1.4954e-78	3.4256e-76	18	49297702	49378271	cd276	CD276 molecule [Source:ZFIN;Acc:ZDB-GENE-070112-452]
comp37453_c0_seq5	1.23276	ENSDARG00000003061	7.40968	2.88941	6.68704	352.077	1.4954e-78	3.4256e-76	18	49297702	49378271	cd276	CD276 molecule [Source:ZFIN;Acc:ZDB-GENE-070112-452]
comp37453_c0_seq6	1.31408	ENSDARG00000003061	7.40968	2.88941	6.68704	352.077	1.4954e-78	3.4256e-76	18	49297702	49378271	cd276	CD276 molecule [Source:ZFIN;Acc:ZDB-GENE-070112-452]
comp37453_c0_seq6	1.31408	ENSDARG00000003061	7.40968	2.88941	6.68704	352.077	1.4954e-78	3.4256e-76	18	49297702	49378271	cd276	CD276 molecule [Source:ZFIN;Acc:ZDB-GENE-070112-452]
comp37801_c0_seq1	0.317194	ENSDARG00000003061	7.40968	2.88941	6.68704	352.077	1.4954e-78	3.4256e-76	18	49297702	49378271	cd276	CD276 molecule [Source:ZFIN;Acc:ZDB-GENE-070112-452]
comp37801_c0_seq1	0.317194	ENSDARG00000003061	7.40968	2.88941	6.68704	352.077	1.4954e-78	3.4256e-76	18	49297702	49378271	cd276	CD276 molecule [Source:ZFIN;Acc:ZDB-GENE-070112-452]
comp26259_c0_seq1	1.54995	ENSDARG00000003153	1.28068	0.356912	5.79307	10.5558	0.00115823	0.00243285	18	22502262	22515713	cpsf5	cleavage and polyadenylation specific factor 5 [Source:ZFIN;Acc:ZDB-GENE-040426-1316]
comp26259_c0_seq2	0.054682	ENSDARG00000003153	1.28068	0.356912	5.79307	10.5558	0.00115823	0.00243285	18	22502262	22515713	cpsf5	cleavage and polyadenylation specific factor 5 [Source:ZFIN;Acc:ZDB-GENE-040426-1316]
comp33058_c0_seq1	1.67287	ENSDARG00000003200	5.33508	2.41551	3.02148	95.2773	1.655e-22	2.9131e-21	4	5681215	5704766	foxm1	forkhead box M1 [Source:ZFIN;Acc:ZDB-GENE-040426-1275]
comp33058_c0_seq2	9.61608	ENSDARG00000003200	5.33508	2.41551	3.02148	95.2773	1.655e-22	2.9131e-21	4	5681215	5704766	foxm1	forkhead box M1 [Source:ZFIN;Acc:ZDB-GENE-040426-1275]
comp16720_c0_seq1	0.450718	ENSDARG00000003213	1.33397	0.415726	6.22576	9.57466	0.00197281	0.00396363	14	49053883	49090126	naa15a	N(alpha)-acetyltransferase 15, NatA auxiliary subunit a [Source:ZFIN;Acc:ZDB-GENE-030131-2392]
comp40766_c0_seq3	1.71322	ENSDARG00000003259	9.7461	3.28483	5.68961	233.024	1.3061e-52	1.2872e-50	10	6767040	6785376	lox	lysyl oxidase [Source:ZFIN;Acc:ZDB-GENE-040426-2398]
comp6586_c0_seq1	3.17422	ENSDARG00000003303	3.00263	1.58623	0.952224	18.5446	1.65978e-05	4.79627e-05	8	52448964	52472441	stc1	stanniocalcin 1 [Source:ZFIN;Acc:ZDB-GENE-060825-79]
comp38806_c0_seq1	0.734825	ENSDARG00000003320	1.24184	0.31248	4.34049	6.23272	0.0125411	0.0216547	19	34468859	34513184	fam91a1	family with sequence similarity 91, member A1 [Source:ZFIN;Acc:ZDB-GENE-040426-1187]
comp41695_c0_seq1	0.400713	ENSDARG00000003375	2.65882	1.41079	5.23377	110.621	7.1638e-26	1.6936e-24	2	10078438	10130118	gng12a	guanine nucleotide binding protein (G protein), gamma 12a [Source:ZFIN;Acc:ZDB-GENE-040426-2555]
comp12308_c0_seq1	1.01046	ENSDARG00000003380	1.70935	0.773451	3.86019	26.8917	2.15178e-07	8.18921e-07	13	30878774	30886005	PAOX	polyamine oxidase (exo-N4-amino) [Source:HGNC Symbol;Acc:HGNC:20837]
comp37897_c0_seq1	0.327383	ENSDARG00000003391	1.26227	0.336018	5.74518	9.66285	0.00188032	0.00378993	24	32591094	32640593	snx7	sorting nexin 7 [Source:ZFIN;Acc:ZDB-GENE-040704-77]
comp41886_c0_seq1	0.253975	ENSDARG00000003487	1.49837	0.58339	5.39706	22.6782	1.91533e-06	6.36605e-06	18	17196479	17237138	nup93	nucleoporin 93 [Source:ZFIN;Acc:ZDB-GENE-990415-46]
comp40620_c0_seq13	1.67252	ENSDARG00000003512	1.35314	0.436312	4.47111	10.1281	0.00146029	0.00300806	4	16955022	17269806	anks1b	ankyrin repeat and sterile alpha motif domain containing 1B [Source:ZFIN;Acc:ZDB-GENE-041210-349]
comp40620_c0_seq13	1.67252	ENSDARG00000003512	1.35314	0.436312	4.47111	10.1281	0.00146029	0.00300806	4	16955022	17269806	anks1b	ankyrin repeat and sterile alpha motif domain containing 1B [Source:ZFIN;Acc:ZDB-GENE-041210-349]
comp40620_c0_seq24	8.9368	ENSDARG00000003512	1.35314	0.436312	4.47111	10.1281	0.00146029	0.00300806	4	16955022	17269806	anks1b	ankyrin repeat and sterile alpha motif domain containing 1B [Source:ZFIN;Acc:ZDB-GENE-041210-349]
comp40620_c0_seq24	8.9368	ENSDARG00000003512	1.35314	0.436312	4.47111	10.1281	0.00146029	0.00300806	4	16955022	17269806	anks1b	ankyrin repeat and sterile alpha motif domain containing 1B [Source:ZFIN;Acc:ZDB-GENE-041210-349]
comp40620_c0_seq6	0.7458	ENSDARG00000003512	1.35314	0.436312	4.47111	10.1281	0.00146029	0.00300806	4	16955022	17269806	anks1b	ankyrin repeat and sterile alpha motif domain containing 1B [Source:ZFIN;Acc:ZDB-GENE-041210-349]
comp40620_c0_seq6	0.7458	ENSDARG00000003512	1.35314	0.436312	4.47111	10.1281	0.00146029	0.00300806	4	16955022	17269806	anks1b	ankyrin repeat and sterile alpha motif domain containing 1B [Source:ZFIN;Acc:ZDB-GENE-041210-349]
comp40620_c0_seq9	10.1255	ENSDARG00000003512	1.35314	0.436312	4.47111	10.1281	0.00146029	0.00300806	4	16955022	17269806	anks1b	ankyrin repeat and sterile alpha motif domain containing 1B [Source:ZFIN;Acc:ZDB-GENE-041210-349]
comp40620_c0_seq9	10.1255	ENSDARG00000003512	1.35314	0.436312	4.47111	10.1281	0.00146029	0.00300806	4	16955022	17269806	anks1b	ankyrin repeat and sterile alpha motif domain containing 1B [Source:ZFIN;Acc:ZDB-GENE-041210-349]
comp44788_c0_seq1	0.225875	ENSDARG00000003512	1.35314	0.436312	4.47111	10.1281	0.00146029	0.00300806	4	16955022	17269806	anks1b	ankyrin repeat and sterile alpha motif domain containing 1B [Source:ZFIN;Acc:ZDB-GENE-041210-349]
comp37827_c0_seq3	1.0064	ENSDARG00000003519	1.61628	0.692681	4.89168	17.6213	2.69555e-05	7.5164e-05	7	56793796	56803068	aprt	adenine phosphoribosyl transferase [Source:ZFIN;Acc:ZDB-GENE-040426-1492]
comp41459_c0_seq1	0.400218	ENSDARG00000003526	1.50291	0.587758	7.49037	18.0635	2.13656e-05	6.0543e-05	11	37183786	37191782	psma5	proteasome (prosome, macropain) subunit, alpha type,5 [Source:ZFIN;Acc:ZDB-GENE-040625-96]
comp35946_c0_seq1	8.86101	ENSDARG00000003546	1.67893	0.747538	4.12444	35.9705	2.00326e-09	9.92612e-09	25	8826203	8888596	unc45a	unc-45 homolog A (C. elegans) [Source:ZFIN;Acc:ZDB-GENE-050417-158]
comp35946_c0_seq2	0.582287	ENSDARG00000003546	1.67893	0.747538	4.12444	35.9705	2.00326e-09	9.92612e-09	25	8826203	8888596	unc45a	unc-45 homolog A (C. elegans) [Source:ZFIN;Acc:ZDB-GENE-050417-158]
comp14135_c0_seq1	0.592126	ENSDARG00000003570	2.26212	1.17768	9.34571	62.426	2.7665e-15	2.5267e-14	4	8898701	8906072	hsp90b1	heat shock protein 90, beta (grp94), member 1 [Source:ZFIN;Acc:ZDB-GENE-031002-1]
comp61782_c0_seq1	0.350827	ENSDARG00000003570	2.26212	1.17768	9.34571	62.426	2.7665e-15	2.5267e-14	4	8898701	8906072	hsp90b1	heat shock protein 90, beta (grp94), member 1 [Source:ZFIN;Acc:ZDB-GENE-031002-1]
comp34209_c0_seq1	7.05169	ENSDARG00000003584	1.46174	0.547686	6.96059	15.0795	0.00010307	0.00026058	20	35486344	35495687	pla2g7	phospholipase A2, group VII (platelet-activating factor acetylhydrolase, plasma) [Source:ZFIN;Acc:ZDB-GENE-040426-2248]
comp34209_c0_seq4	9.07739	ENSDARG00000003584	1.46174	0.547686	6.96059	15.0795	0.00010307	0.00026058	20	35486344	35495687	pla2g7	phospholipase A2, group VII (platelet-activating factor acetylhydrolase, plasma) [Source:ZFIN;Acc:ZDB-GENE-040426-2248]
comp16737_c0_seq2	0.849334	ENSDARG00000003616	1.40148	0.486954	4.11359	14.3855	0.00014894	0.00036622	18	18660444	18681728	arih1	ariadne ubiquitin-conjugating enzyme E2 binding protein homolog 1 (Drosophila) [Source:ZFIN;Acc:ZDB-GENE-030131-5213]
comp51646_c0_seq1	0.849163	ENSDARG00000003680	1.65142	0.723711	2.12024	9.33577	0.00224723	0.00447309	19	35066232	35150588	runx1t1	runt-related transcription factor 1; translocated to, 1 (cyclin D-related) [Source:ZFIN;Acc:ZDB-GENE-060929-164]
comp28594_c0_seq1	0.398324	ENSDARG00000003681	1.30125	0.379896	8.11201	11.4532	0.00071372	0.00155346	20	18774911	18786109	eif5	eukaryotic translation initiation factor 5 [Source:ZFIN;Acc:ZDB-GENE-030131-975]
comp62442_c0_seq1	0.935788	ENSDARG00000003681	1.30125	0.379896	8.11201	11.4532	0.00071372	0.00155346	20	18774911	18786109	eif5	eukaryotic translation initiation factor 5 [Source:ZFIN;Acc:ZDB-GENE-030131-975]
comp21290_c0_seq1	0.299263	ENSDARG00000003693	1.81397	0.859152	6.24641	26.9467	2.09147e-07	7.97403e-07	14	7345664	7364109	hars	histidyl-tRNA synthetase [Source:ZFIN;Acc:ZDB-GENE-040912-152]
comp42968_c0_seq1	1.01504	ENSDARG00000003693	1.81397	0.859152	6.24641	26.9467	2.09147e-07	7.97403e-07	14	7345664	7364109	hars	histidyl-tRNA synthetase [Source:ZFIN;Acc:ZDB-GENE-040912-152]
comp8461_c0_seq1	0.364519	ENSDARG00000003693	1.81397	0.859152	6.24641	26.9467	2.09147e-07	7.97403e-07	14	7345664	7364109	hars	histidyl-tRNA synthetase [Source:ZFIN;Acc:ZDB-GENE-040912-152]
comp37570_c0_seq1	0.674781	ENSDARG00000003699	1.32433	0.405258	4.23655	10.3303	0.00130866	0.00272219	14	23400340	23445024	atp7a	ATPase, Cu++ transporting, alpha polypeptide [Source:ZFIN;Acc:ZDB-GENE-060825-45]
comp32124_c0_seq1	1.52045	ENSDARG00000003789	2.15826	1.10987	4.55362	34.4927	4.2785e-09	2.0281e-08	4	15717726	15775162	dennd5b	DENN/MADD domain containing 5B [Source:ZFIN;Acc:ZDB-GENE-030131-2248]
comp32124_c0_seq2	0.717353	ENSDARG00000003789	2.15826	1.10987	4.55362	34.4927	4.2785e-09	2.0281e-08	4	15717726	15775162	dennd5b	DENN/MADD domain containing 5B [Source:ZFIN;Acc:ZDB-GENE-030131-2248]
comp33582_c0_seq1	1.29599	ENSDARG00000003829	1.5884	0.667572	5.85778	26.0986	3.24417e-07	1.2057e-06	13	24292467	24442685	galnt2	UDP-N-acetyl-alpha-D-galactosamine:polypeptide N-acetylgalactosaminyltransferase 2 [Source:ZFIN;Acc:ZDB-GENE-041111-110]
comp35571_c0_seq1	0.654994	ENSDARG00000003845	1.47332	0.559072	4.74134	26.3177	2.89627e-07	1.08568e-06	21	33652581	33759726	chm	choroideremia (Rab escort protein 1) [Source:ZFIN;Acc:ZDB-GENE-030318-2]
comp16447_c0_seq1	0.571599	ENSDARG00000003860	1.36437	0.448235	6.79951	15.8327	6.91959e-05	0.00017979	19	20267100	20270413	cbx3a	chromobox homolog 3a (HP1 gamma homolog, Drosophila) [Source:ZFIN;Acc:ZDB-GENE-030131-1158]
comp16447_c0_seq2	1.36766	ENSDARG00000003860	1.36437	0.448235	6.79951	15.8327	6.91959e-05	0.00017979	19	20267100	20270413	cbx3a	chromobox homolog 3a (HP1 gamma homolog, Drosophila) [Source:ZFIN;Acc:ZDB-GENE-030131-1158]
comp54912_c0_seq1	1.91377	ENSDARG00000003860	1.36437	0.448235	6.79951	15.8327	6.91959e-05	0.00017979	19	20267100	20270413	cbx3a	chromobox homolog 3a (HP1 gamma homolog, Drosophila) [Source:ZFIN;Acc:ZDB-GENE-030131-1158]
comp26292_c0_seq1	1.67923	ENSDARG00000003931	1.43722	0.523284	8.12143	13.5826	0.00022829	0.00054435	19	21283357	21305396	cndp2	CNDP dipeptidase 2 (metallopeptidase M20 family) [Source:ZFIN;Acc:ZDB-GENE-030131-5499]
comp41088_c0_seq1	0.254145	ENSDARG00000003940	1.62074	0.696655	4.87674	47.9787	4.3087e-12	2.8614e-11	17	24546429	24555412	mtfr1l	mitochondrial fission regulator 1-like [Source:ZFIN;Acc:ZDB-GENE-030131-6228]
comp37775_c0_seq1	0.193437	ENSDARG00000003984	1.1845	0.244278	4.67889	4.77327	0.0289048	0.0462188	10	23359145	23399550	LTN1	listerin E3 ubiquitin protein ligase 1 [Source:HGNC Symbol;Acc:HGNC:13082]
comp37775_c0_seq1	0.193437	ENSDARG00000003984	1.1845	0.244278	4.67889	4.77327	0.0289048	0.0462188	10	23359145	23399550	LTN1	listerin E3 ubiquitin protein ligase 1 [Source:HGNC Symbol;Acc:HGNC:13082]
comp28110_c0_seq1	0.956531	ENSDARG00000004018	3.44414	1.78415	1.72811	56.4648	5.7214e-14	4.6073e-13	23	34992918	35027342	CHST13	carbohydrate (chondroitin 4) sulfotransferase 13 [Source:HGNC Symbol;Acc:HGNC:21755]
comp33671_c0_seq3	9.8979	ENSDARG00000004055	1.63404	0.708439	3.38682	13.4335	0.00024717	0.0005859	4	17277222	17349254	uhrf1bp1l	UHRF1 (ICBP90) binding protein 1-like [Source:ZFIN;Acc:ZDB-GENE-041210-177]
comp43320_c0_seq1	0.132987	ENSDARG00000004074	1.51044	0.594967	3.697	9.09998	0.00255612	0.00503647	20	23951986	24104980	bach2b	BTB and CNC homology 1, basic leucine zipper transcription factor 2b [Source:ZFIN;Acc:ZDB-GENE-041001-139]
comp26820_c0_seq1	0.743212	ENSDARG00000004151	2.06469	1.04592	1.13421	18.6683	1.55549e-05	4.52034e-05	13	1254310	1267359	rab23	RAB23, member RAS oncogene family [Source:ZFIN;Acc:ZDB-GENE-050522-328]
comp26254_c0_seq1	0.234343	ENSDARG00000004158	11.0248	3.46268	0.266665	57.351	3.6459e-14	3.0074e-13	17	44946528	45090023	TMEM63C	transmembrane protein 63C [Source:HGNC Symbol;Acc:HGNC:23787]
comp39830_c0_seq1	0.431125	ENSDARG00000004173	1.50762	0.592273	7.79423	19.1111	1.23325e-05	3.62931e-05	2	36897647	36926913	copa	coatomer protein complex, subunit alpha [Source:ZFIN;Acc:ZDB-GENE-020905-2]
comp36881_c0_seq1	0.495367	ENSDARG00000004174	1.31747	0.397767	6.54387	8.93904	0.00279139	0.00545281	25	17670327	17703688	cnot1	CCR4-NOT transcription complex, subunit 1 [Source:ZFIN;Acc:ZDB-GENE-040915-1]
comp36881_c0_seq10	1.22913	ENSDARG00000004174	1.31747	0.397767	6.54387	8.93904	0.00279139	0.00545281	25	17670327	17703688	cnot1	CCR4-NOT transcription complex, subunit 1 [Source:ZFIN;Acc:ZDB-GENE-040915-1]
comp36881_c0_seq15	1.42235	ENSDARG00000004174	1.31747	0.397767	6.54387	8.93904	0.00279139	0.00545281	25	17670327	17703688	cnot1	CCR4-NOT transcription complex, subunit 1 [Source:ZFIN;Acc:ZDB-GENE-040915-1]
comp36881_c0_seq16	0.180111	ENSDARG00000004174	1.31747	0.397767	6.54387	8.93904	0.00279139	0.00545281	25	17670327	17703688	cnot1	CCR4-NOT transcription complex, subunit 1 [Source:ZFIN;Acc:ZDB-GENE-040915-1]
comp36881_c0_seq3	0.0709511	ENSDARG00000004174	1.31747	0.397767	6.54387	8.93904	0.00279139	0.00545281	25	17670327	17703688	cnot1	CCR4-NOT transcription complex, subunit 1 [Source:ZFIN;Acc:ZDB-GENE-040915-1]
comp36881_c0_seq4	0.440432	ENSDARG00000004174	1.31747	0.397767	6.54387	8.93904	0.00279139	0.00545281	25	17670327	17703688	cnot1	CCR4-NOT transcription complex, subunit 1 [Source:ZFIN;Acc:ZDB-GENE-040915-1]
comp36881_c0_seq7	0.604809	ENSDARG00000004174	1.31747	0.397767	6.54387	8.93904	0.00279139	0.00545281	25	17670327	17703688	cnot1	CCR4-NOT transcription complex, subunit 1 [Source:ZFIN;Acc:ZDB-GENE-040915-1]
comp36881_c0_seq8	0.181476	ENSDARG00000004174	1.31747	0.397767	6.54387	8.93904	0.00279139	0.00545281	25	17670327	17703688	cnot1	CCR4-NOT transcription complex, subunit 1 [Source:ZFIN;Acc:ZDB-GENE-040915-1]
comp13969_c0_seq1	0.690161	ENSDARG00000004176	2.13198	1.09219	1.5555	20.0639	7.4898e-06	2.2716e-05	16	7158139	7435459	ulk4	unc-51-like kinase 4 (C. elegans) [Source:ZFIN;Acc:ZDB-GENE-100922-243]
comp29488_c0_seq1	0.641119	ENSDARG00000004176	2.13198	1.09219	1.5555	20.0639	7.4898e-06	2.2716e-05	16	7158139	7435459	ulk4	unc-51-like kinase 4 (C. elegans) [Source:ZFIN;Acc:ZDB-GENE-100922-243]
comp53811_c0_seq1	0.180111	ENSDARG00000004176	2.13198	1.09219	1.5555	20.0639	7.4898e-06	2.2716e-05	16	7158139	7435459	ulk4	unc-51-like kinase 4 (C. elegans) [Source:ZFIN;Acc:ZDB-GENE-100922-243]
comp42746_c0_seq1	0.181262	ENSDARG00000004184	1.73222	0.79262	1.08688	9.33143	0.00225256	0.00448317	10	38602081	38728184	nf1b	neurofibromin 1b [Source:ZFIN;Acc:ZDB-GENE-091111-4]
comp44117_c0_seq1	0.924545	ENSDARG00000004184	1.73222	0.79262	1.08688	9.33143	0.00225256	0.00448317	10	38602081	38728184	nf1b	neurofibromin 1b [Source:ZFIN;Acc:ZDB-GENE-091111-4]
comp44156_c0_seq1	0.321585	ENSDARG00000004184	1.73222	0.79262	1.08688	9.33143	0.00225256	0.00448317	10	38602081	38728184	nf1b	neurofibromin 1b [Source:ZFIN;Acc:ZDB-GENE-091111-4]
comp54978_c0_seq1	0.333171	ENSDARG00000004184	1.73222	0.79262	1.08688	9.33143	0.00225256	0.00448317	10	38602081	38728184	nf1b	neurofibromin 1b [Source:ZFIN;Acc:ZDB-GENE-091111-4]
comp15660_c0_seq1	1.51402	ENSDARG00000004189	1.25965	0.333025	6.26571	9.66589	0.00187721	0.00378456	3	24341284	24362823	cbx1a	chromobox homolog 1a (HP1 beta homolog Drosophila) [Source:ZFIN;Acc:ZDB-GENE-030131-4945]
comp33740_c0_seq1	0.510185	ENSDARG00000004189	1.25965	0.333025	6.26571	9.66589	0.00187721	0.00378456	3	24341284	24362823	cbx1a	chromobox homolog 1a (HP1 beta homolog Drosophila) [Source:ZFIN;Acc:ZDB-GENE-030131-4945]
comp38863_c0_seq1	1.53244	ENSDARG00000004246	2.43719	1.28522	5.01478	73.8331	8.5009e-18	9.7893e-17	1	22557443	22684130	slit2	slit (Drosophila) homolog 2 [Source:ZFIN;Acc:ZDB-GENE-010306-3]
comp36115_c0_seq1	0.00268141	ENSDARG00000004251	1.94144	0.957127	4.02829	25.9161	3.56583e-07	1.31658e-06	5	27782862	27791037	dhfr	dihydrofolate reductase [Source:ZFIN;Acc:ZDB-GENE-010406-5]
comp41473_c0_seq1	0.285335	ENSDARG00000004261	1.60026	0.678304	7.97666	27.5933	1.49693e-07	5.81849e-07	14	27413738	27421016	tmed9	transmembrane emp24 protein transport domain containing 9 [Source:ZFIN;Acc:ZDB-GENE-050417-434]
comp41842_c0_seq1	0.28987	ENSDARG00000004280	1.27233	0.347476	6.01028	13.001	0.00031132	0.00072519	19	13028709	13054114	seh1l	SEH1-like (S. cerevisiae) [Source:ZFIN;Acc:ZDB-GENE-030131-6689]
comp41842_c0_seq1	0.28987	ENSDARG00000004280	1.27233	0.347476	6.01028	13.001	0.00031132	0.00072519	19	13028709	13054114	seh1l	SEH1-like (S. cerevisiae) [Source:ZFIN;Acc:ZDB-GENE-030131-6689]
comp16343_c0_seq2	0.516396	ENSDARG00000004427	1.62247	0.698193	5.29034	26.8735	2.17217e-07	8.2631e-07	1	51548880	51551650	dpy30	dpy-30 homolog (C. elegans) [Source:ZFIN;Acc:ZDB-GENE-040718-136]
comp15836_c0_seq1	0.0662564	ENSDARG00000004436	1.76782	0.821973	3.83954	28.0871	1.15977e-07	4.57087e-07	19	34623246	34639709	fam92a1	family with sequence similarity 92, member A1 [Source:ZFIN;Acc:ZDB-GENE-040801-123]
comp63497_c0_seq1	1.0175	ENSDARG00000004436	1.76782	0.821973	3.83954	28.0871	1.15977e-07	4.57087e-07	19	34623246	34639709	fam92a1	family with sequence similarity 92, member A1 [Source:ZFIN;Acc:ZDB-GENE-040801-123]
comp32202_c0_seq1	0.0568519	ENSDARG00000004452	1.18124	0.240307	7.22129	4.85452	0.0275739	0.0442534	23	29600682	29605737	tardbpl	TAR DNA binding protein, like [Source:ZFIN;Acc:ZDB-GENE-031030-1]
comp32202_c0_seq2	1.53785	ENSDARG00000004452	1.18124	0.240307	7.22129	4.85452	0.0275739	0.0442534	23	29600682	29605737	tardbpl	TAR DNA binding protein, like [Source:ZFIN;Acc:ZDB-GENE-031030-1]
comp36787_c0_seq11	12.7134	ENSDARG00000004452	1.18124	0.240307	7.22129	4.85452	0.0275739	0.0442534	23	29600682	29605737	tardbpl	TAR DNA binding protein, like [Source:ZFIN;Acc:ZDB-GENE-031030-1]
comp36787_c0_seq14	0.163892	ENSDARG00000004452	1.18124	0.240307	7.22129	4.85452	0.0275739	0.0442534	23	29600682	29605737	tardbpl	TAR DNA binding protein, like [Source:ZFIN;Acc:ZDB-GENE-031030-1]
comp36787_c0_seq15	10.0844	ENSDARG00000004452	1.18124	0.240307	7.22129	4.85452	0.0275739	0.0442534	23	29600682	29605737	tardbpl	TAR DNA binding protein, like [Source:ZFIN;Acc:ZDB-GENE-031030-1]
comp36787_c0_seq8	1.33365	ENSDARG00000004452	1.18124	0.240307	7.22129	4.85452	0.0275739	0.0442534	23	29600682	29605737	tardbpl	TAR DNA binding protein, like [Source:ZFIN;Acc:ZDB-GENE-031030-1]
comp36787_c0_seq9	10.526	ENSDARG00000004452	1.18124	0.240307	7.22129	4.85452	0.0275739	0.0442534	23	29600682	29605737	tardbpl	TAR DNA binding protein, like [Source:ZFIN;Acc:ZDB-GENE-031030-1]
comp25914_c0_seq1	0.665725	ENSDARG00000004460	2.07659	1.05421	3.60225	41.3901	1.2469e-10	7.071e-10	13	11265947	11286063	desi2	desumoylating isopeptidase 2 [Source:ZFIN;Acc:ZDB-GENE-040801-39]
comp6485_c0_seq1	1.83369	ENSDARG00000004576	2.3022	1.20302	2.81444	30.8124	2.84222e-08	1.21326e-07	17	43455540	43473184	plk4	polo-like kinase 4 (Drosophila) [Source:ZFIN;Acc:ZDB-GENE-030619-14]
comp37870_c0_seq2	0.361972	ENSDARG00000004581	1.20238	0.265893	6.07643	6.58303	0.0102956	0.0181018	20	27017023	27032905	sel1l	sel-1 suppressor of lin-12-like (C. elegans) [Source:ZFIN;Acc:ZDB-GENE-041001-122]
comp26314_c0_seq1	8.55918	ENSDARG00000004635	4.06508	2.02328	4.9988	132.904	9.4898e-31	3.1175e-29	20	24847443	24992645	epha7	eph receptor A7 [Source:ZFIN;Acc:ZDB-GENE-030131-3745]
comp43799_c0_seq1	0.515378	ENSDARG00000004635	4.06508	2.02328	4.9988	132.904	9.4898e-31	3.1175e-29	20	24847443	24992645	epha7	eph receptor A7 [Source:ZFIN;Acc:ZDB-GENE-030131-3745]
comp48798_c0_seq1	0.330365	ENSDARG00000004635	4.06508	2.02328	4.9988	132.904	9.4898e-31	3.1175e-29	20	24847443	24992645	epha7	eph receptor A7 [Source:ZFIN;Acc:ZDB-GENE-030131-3745]
comp34493_c0_seq1	1.65638	ENSDARG00000004665	2.66949	1.41656	8.87079	46.8361	7.7179e-12	4.9905e-11	5	2513293	2521203	hspa5	heat shock protein 5 [Source:ZFIN;Acc:ZDB-GENE-031001-11]
comp60472_c0_seq1	0.758752	ENSDARG00000004665	2.66949	1.41656	8.87079	46.8361	7.7179e-12	4.9905e-11	5	2513293	2521203	hspa5	heat shock protein 5 [Source:ZFIN;Acc:ZDB-GENE-031001-11]
comp64519_c0_seq1	0.819463	ENSDARG00000004665	2.66949	1.41656	8.87079	46.8361	7.7179e-12	4.9905e-11	5	2513293	2521203	hspa5	heat shock protein 5 [Source:ZFIN;Acc:ZDB-GENE-031001-11]
comp36079_c0_seq2	0.687022	ENSDARG00000004672	1.30992	0.389476	4.83269	8.45951	0.00363139	0.00695859	16	33040836	33173290	ptk2.1	protein tyrosine kinase 2a [Source:ZFIN;Acc:ZDB-GENE-020114-1]
comp33357_c0_seq1	0.211668	ENSDARG00000004692	1.56342	0.644707	5.60663	30.0075	4.30386e-08	1.79294e-07	9	25248005	25251712	nabp1a	nucleic acid binding protein 1a [Source:ZFIN;Acc:ZDB-GENE-041212-71]
comp33357_c0_seq2	1.61074	ENSDARG00000004692	1.56342	0.644707	5.60663	30.0075	4.30386e-08	1.79294e-07	9	25248005	25251712	nabp1a	nucleic acid binding protein 1a [Source:ZFIN;Acc:ZDB-GENE-041212-71]
comp42004_c0_seq1	2.53877	ENSDARG00000004713	5.08727	2.34689	4.49039	191.716	1.3421e-43	8.8866e-42	7	58874321	58882730	mad2l1	MAD2 mitotic arrest deficient-like 1 (yeast) [Source:ZFIN;Acc:ZDB-GENE-030515-3]
comp16764_c0_seq4	0.180111	ENSDARG00000004714	1.90136	0.92703	5.65111	45.5533	1.4854e-11	9.3672e-11	7	53971789	54164943	tcf12	transcription factor 12 [Source:ZFIN;Acc:ZDB-GENE-040516-11]
comp30294_c0_seq1	6.83111	ENSDARG00000004714	1.90136	0.92703	5.65111	45.5533	1.4854e-11	9.3672e-11	7	53971789	54164943	tcf12	transcription factor 12 [Source:ZFIN;Acc:ZDB-GENE-040516-11]
comp30294_c0_seq11	0.120825	ENSDARG00000004714	1.90136	0.92703	5.65111	45.5533	1.4854e-11	9.3672e-11	7	53971789	54164943	tcf12	transcription factor 12 [Source:ZFIN;Acc:ZDB-GENE-040516-11]
comp30294_c0_seq16	5.67693	ENSDARG00000004714	1.90136	0.92703	5.65111	45.5533	1.4854e-11	9.3672e-11	7	53971789	54164943	tcf12	transcription factor 12 [Source:ZFIN;Acc:ZDB-GENE-040516-11]
comp30294_c0_seq19	7.86411	ENSDARG00000004714	1.90136	0.92703	5.65111	45.5533	1.4854e-11	9.3672e-11	7	53971789	54164943	tcf12	transcription factor 12 [Source:ZFIN;Acc:ZDB-GENE-040516-11]
comp30294_c0_seq2	1.7524	ENSDARG00000004714	1.90136	0.92703	5.65111	45.5533	1.4854e-11	9.3672e-11	7	53971789	54164943	tcf12	transcription factor 12 [Source:ZFIN;Acc:ZDB-GENE-040516-11]
comp30294_c0_seq26	5.67693	ENSDARG00000004714	1.90136	0.92703	5.65111	45.5533	1.4854e-11	9.3672e-11	7	53971789	54164943	tcf12	transcription factor 12 [Source:ZFIN;Acc:ZDB-GENE-040516-11]
comp30294_c0_seq30	6.47215	ENSDARG00000004714	1.90136	0.92703	5.65111	45.5533	1.4854e-11	9.3672e-11	7	53971789	54164943	tcf12	transcription factor 12 [Source:ZFIN;Acc:ZDB-GENE-040516-11]
comp30294_c0_seq31	5.27127	ENSDARG00000004714	1.90136	0.92703	5.65111	45.5533	1.4854e-11	9.3672e-11	7	53971789	54164943	tcf12	transcription factor 12 [Source:ZFIN;Acc:ZDB-GENE-040516-11]
comp30294_c0_seq33	6.12865	ENSDARG00000004714	1.90136	0.92703	5.65111	45.5533	1.4854e-11	9.3672e-11	7	53971789	54164943	tcf12	transcription factor 12 [Source:ZFIN;Acc:ZDB-GENE-040516-11]
comp30294_c0_seq4	5.01568	ENSDARG00000004714	1.90136	0.92703	5.65111	45.5533	1.4854e-11	9.3672e-11	7	53971789	54164943	tcf12	transcription factor 12 [Source:ZFIN;Acc:ZDB-GENE-040516-11]
comp30294_c0_seq8	7.74267	ENSDARG00000004714	1.90136	0.92703	5.65111	45.5533	1.4854e-11	9.3672e-11	7	53971789	54164943	tcf12	transcription factor 12 [Source:ZFIN;Acc:ZDB-GENE-040516-11]
comp30294_c0_seq9	7.18199	ENSDARG00000004714	1.90136	0.92703	5.65111	45.5533	1.4854e-11	9.3672e-11	7	53971789	54164943	tcf12	transcription factor 12 [Source:ZFIN;Acc:ZDB-GENE-040516-11]
comp35755_c0_seq1	1.18729	ENSDARG00000004714	1.90136	0.92703	5.65111	45.5533	1.4854e-11	9.3672e-11	7	53971789	54164943	tcf12	transcription factor 12 [Source:ZFIN;Acc:ZDB-GENE-040516-11]
comp35755_c0_seq2	1.635	ENSDARG00000004714	1.90136	0.92703	5.65111	45.5533	1.4854e-11	9.3672e-11	7	53971789	54164943	tcf12	transcription factor 12 [Source:ZFIN;Acc:ZDB-GENE-040516-11]
comp35755_c0_seq4	0.410513	ENSDARG00000004714	1.90136	0.92703	5.65111	45.5533	1.4854e-11	9.3672e-11	7	53971789	54164943	tcf12	transcription factor 12 [Source:ZFIN;Acc:ZDB-GENE-040516-11]
comp46180_c0_seq1	0.51733	ENSDARG00000004714	1.90136	0.92703	5.65111	45.5533	1.4854e-11	9.3672e-11	7	53971789	54164943	tcf12	transcription factor 12 [Source:ZFIN;Acc:ZDB-GENE-040516-11]
comp58944_c0_seq1	0.935788	ENSDARG00000004714	1.90136	0.92703	5.65111	45.5533	1.4854e-11	9.3672e-11	7	53971789	54164943	tcf12	transcription factor 12 [Source:ZFIN;Acc:ZDB-GENE-040516-11]
comp25666_c0_seq1	0.605546	ENSDARG00000004735	1.55552	0.637393	7.62014	25.1209	5.38466e-07	1.93955e-06	20	35083242	35095084	hnrnpub	heterogeneous nuclear ribonucleoprotein Ub [Source:ZFIN;Acc:ZDB-GENE-030131-6422]
comp34011_c0_seq1	0.0766711	ENSDARG00000004774	1.34282	0.425271	4.623	9.60387	0.00194168	0.00390385	5	57275953	57323452	wdr36	WD repeat domain 36 [Source:ZFIN;Acc:ZDB-GENE-030131-464]
comp28763_c0_seq3	1.64166	ENSDARG00000004796	1.45838	0.54437	3.72668	13.5476	0.00023259	0.00055376	3	55701269	55723819	mgrn1b	mahogunin, ring finger 1b [Source:ZFIN;Acc:ZDB-GENE-110401-3]
comp28095_c0_seq1	0.342602	ENSDARG00000004870	1.26665	0.341022	5.67007	8.98383	0.00272379	0.00533583	17	51731080	51749655	psen1	presenilin 1 [Source:ZFIN;Acc:ZDB-GENE-991119-4]
comp41639_c0_seq1	1.39861	ENSDARG00000004926	1.98364	0.988147	5.00352	44.6104	2.4041e-11	1.4813e-10	14	18741669	18746150	slbp	stem-loop binding protein [Source:ZFIN;Acc:ZDB-GENE-030131-9686]
comp36222_c0_seq1	0.959516	ENSDARG00000004937	4.86473	2.28236	3.23896	136.67	1.4238e-31	4.8759e-30	21	21298991	21311207	skp2	S-phase kinase-associated protein 2 (p45) [Source:ZFIN;Acc:ZDB-GENE-030219-158]
comp33647_c0_seq1	0.302121	ENSDARG00000005057	1.3585	0.442014	4.32938	8.9444	0.00278322	0.00543843	8	17704010	17712441	dimt1l	DIM1 dimethyladenosine transferase 1-like (S. cerevisiae) [Source:ZFIN;Acc:ZDB-GENE-040801-75]
comp12715_c0_seq1	1.06099	ENSDARG00000005058	3.41112	1.77024	4.73579	102.346	4.6636e-24	9.5243e-23	2	44811404	44839093	ncapd2	non-SMC condensin I complex, subunit D2 [Source:ZFIN;Acc:ZDB-GENE-050506-59]
comp16160_c0_seq1	0.958524	ENSDARG00000005078	1.4607	0.546661	6.03455	23.7092	1.12047e-06	3.85568e-06	23	10830270	10851547	eif4e3	eukaryotic translation initiation factor 4E family member 3 [Source:ZFIN;Acc:ZDB-GENE-040912-156]
comp32752_c0_seq1	0.941695	ENSDARG00000005098	3.29324	1.71951	3.86538	74.2225	6.979e-18	8.1083e-17	21	19138091	19150691
comp26144_c0_seq1	0.576984	ENSDARG00000005122	1.84245	0.881622	6.45546	28.9835	7.29965e-08	2.95455e-07	21	15563063	15618633	atp2a2b	ATPase, Ca++ transporting, cardiac muscle, slow twitch 2b [Source:ZFIN;Acc:ZDB-GENE-030131-867]
comp74102_c0_seq1	1.83684	ENSDARG00000005230	1.94285	0.958174	8.12551	55.66	8.6152e-14	6.8273e-13	19	11721333	11728971	ssr2	signal sequence receptor, beta [Source:ZFIN;Acc:ZDB-GENE-010413-1]
comp36650_c0_seq1	0.933834	ENSDARG00000005236	1.32346	0.404311	5.57336	11.4646	0.00070934	0.0015449	12	28632751	28663317	srcap	Snf2-related CREBBP activator protein [Source:ZFIN;Acc:ZDB-GENE-041008-127]
comp3860_c0_seq1	2.04068	ENSDARG00000005236	1.32346	0.404311	5.57336	11.4646	0.00070934	0.0015449	12	28632751	28663317	srcap	Snf2-related CREBBP activator protein [Source:ZFIN;Acc:ZDB-GENE-041008-127]
comp15670_c0_seq1	0.318097	ENSDARG00000005333	1.29296	0.370675	6.85033	6.80386	0.00909611	0.0161657	10	8107187	8299534	tln1	talin 1 [Source:ZFIN;Acc:ZDB-GENE-031002-48]
comp39140_c0_seq1	0.0567128	ENSDARG00000005350	1.78038	0.832182	6.38142	30.6749	3.05093e-08	1.2968e-07	23	27599359	27683181	dip2ba	DIP2 disco-interacting protein 2 homolog Ba (Drosophila) [Source:ZFIN;Acc:ZDB-GENE-040426-2305]
comp39140_c0_seq2	1.24496	ENSDARG00000005350	1.78038	0.832182	6.38142	30.6749	3.05093e-08	1.2968e-07	23	27599359	27683181	dip2ba	DIP2 disco-interacting protein 2 homolog Ba (Drosophila) [Source:ZFIN;Acc:ZDB-GENE-040426-2305]
comp33032_c0_seq2	0.344978	ENSDARG00000005356	2.27754	1.18748	0.00203942	10.6119	0.00112361	0.0023657	17	10047820	10099711	tyro3	TYRO3 protein tyrosine kinase [Source:ZFIN;Acc:ZDB-GENE-990714-13]
comp6074_c0_seq1	2.26903	ENSDARG00000005356	2.27754	1.18748	0.00203942	10.6119	0.00112361	0.0023657	17	10047820	10099711	tyro3	TYRO3 protein tyrosine kinase [Source:ZFIN;Acc:ZDB-GENE-990714-13]
comp6074_c0_seq2	0.0164037	ENSDARG00000005356	2.27754	1.18748	0.00203942	10.6119	0.00112361	0.0023657	17	10047820	10099711	tyro3	TYRO3 protein tyrosine kinase [Source:ZFIN;Acc:ZDB-GENE-990714-13]
comp37744_c0_seq2	9.93533	ENSDARG00000005374	1.447	0.533063	4.20846	17.6067	2.71633e-05	7.56566e-05	7	54392211	54408828	tubgcp4	tubulin, gamma complex associated protein 4 [Source:ZFIN;Acc:ZDB-GENE-081022-124]
comp37744_c0_seq3	0.918653	ENSDARG00000005374	1.447	0.533063	4.20846	17.6067	2.71633e-05	7.56566e-05	7	54392211	54408828	tubgcp4	tubulin, gamma complex associated protein 4 [Source:ZFIN;Acc:ZDB-GENE-081022-124]
comp29405_c0_seq1	0.030649	ENSDARG00000005419	2.30481	1.20465	3.63789	12.0818	0.00050917	0.00114001	10	46393914	46401024	il1b	interleukin 1, beta [Source:ZFIN;Acc:ZDB-GENE-040702-2]
comp35752_c0_seq1	2.46264	ENSDARG00000005419	2.30481	1.20465	3.63789	12.0818	0.00050917	0.00114001	10	46393914	46401024	il1b	interleukin 1, beta [Source:ZFIN;Acc:ZDB-GENE-040702-2]
comp35752_c0_seq2	2.9257	ENSDARG00000005419	2.30481	1.20465	3.63789	12.0818	0.00050917	0.00114001	10	46393914	46401024	il1b	interleukin 1, beta [Source:ZFIN;Acc:ZDB-GENE-040702-2]
comp24076_c0_seq2	0.306491	ENSDARG00000005425	1.53727	0.620371	3.76006	20.8275	5.02573e-06	1.568e-05	15	42024628	42084656	wdfy1	WD repeat and FYVE domain containing 1 [Source:ZFIN;Acc:ZDB-GENE-041024-4]
comp29604_c0_seq1	2.9344	ENSDARG00000005454	5.36368	2.42322	4.86704	195.89	1.647e-44	1.1681e-42	13	36282172	36293842	tacc3	transforming, acidic coiled-coil containing protein 3 [Source:ZFIN;Acc:ZDB-GENE-050522-327]
comp40088_c0_seq1	3.0627	ENSDARG00000005462	2.22143	1.15149	4.69252	39.2518	3.7253e-10	2.00785e-09	21	43273690	43308834	KIF4A	kinesin family member 4A [Source:HGNC Symbol;Acc:HGNC:13339]
comp35926_c0_seq1	1.34311	ENSDARG00000005463	2.07728	1.05469	4.80029	53.9297	2.078e-13	1.5924e-12	20	13808897	13828564	slc30a1a	solute carrier family 30 (zinc transporter), member 1a [Source:ZFIN;Acc:ZDB-GENE-040426-1840]
comp40643_c0_seq1	1.8254	ENSDARG00000005463	2.07728	1.05469	4.80029	53.9297	2.078e-13	1.5924e-12	20	13808897	13828564	slc30a1a	solute carrier family 30 (zinc transporter), member 1a [Source:ZFIN;Acc:ZDB-GENE-040426-1840]
comp40643_c0_seq2	10.8242	ENSDARG00000005463	2.07728	1.05469	4.80029	53.9297	2.078e-13	1.5924e-12	20	13808897	13828564	slc30a1a	solute carrier family 30 (zinc transporter), member 1a [Source:ZFIN;Acc:ZDB-GENE-040426-1840]
comp34941_c0_seq1	0.529516	ENSDARG00000005479	2.33339	1.22243	4.73204	76.6505	2.0406e-18	2.4938e-17	1	39750404	40142441	tenm3	teneurin transmembrane protein 3 [Source:ZFIN;Acc:ZDB-GENE-990714-19]
comp39525_c0_seq1	7.24297	ENSDARG00000005482	1.44116	0.527232	3.82413	11.9685	0.00054108	0.00120454	14	50716244	50966935	rapgef2	Rap guanine nucleotide exchange factor (GEF) 2 [Source:ZFIN;Acc:ZDB-GENE-030131-6959]
comp39525_c0_seq12	0.611121	ENSDARG00000005482	1.44116	0.527232	3.82413	11.9685	0.00054108	0.00120454	14	50716244	50966935	rapgef2	Rap guanine nucleotide exchange factor (GEF) 2 [Source:ZFIN;Acc:ZDB-GENE-030131-6959]
comp39525_c0_seq13	3.75915	ENSDARG00000005482	1.44116	0.527232	3.82413	11.9685	0.00054108	0.00120454	14	50716244	50966935	rapgef2	Rap guanine nucleotide exchange factor (GEF) 2 [Source:ZFIN;Acc:ZDB-GENE-030131-6959]
comp39525_c0_seq2	5.48831	ENSDARG00000005482	1.44116	0.527232	3.82413	11.9685	0.00054108	0.00120454	14	50716244	50966935	rapgef2	Rap guanine nucleotide exchange factor (GEF) 2 [Source:ZFIN;Acc:ZDB-GENE-030131-6959]
comp39525_c0_seq4	0.938223	ENSDARG00000005482	1.44116	0.527232	3.82413	11.9685	0.00054108	0.00120454	14	50716244	50966935	rapgef2	Rap guanine nucleotide exchange factor (GEF) 2 [Source:ZFIN;Acc:ZDB-GENE-030131-6959]
comp39525_c0_seq5	8.91823	ENSDARG00000005482	1.44116	0.527232	3.82413	11.9685	0.00054108	0.00120454	14	50716244	50966935	rapgef2	Rap guanine nucleotide exchange factor (GEF) 2 [Source:ZFIN;Acc:ZDB-GENE-030131-6959]
comp39525_c0_seq8	2.27703	ENSDARG00000005482	1.44116	0.527232	3.82413	11.9685	0.00054108	0.00120454	14	50716244	50966935	rapgef2	Rap guanine nucleotide exchange factor (GEF) 2 [Source:ZFIN;Acc:ZDB-GENE-030131-6959]
comp47330_c0_seq1	0.969171	ENSDARG00000005482	1.44116	0.527232	3.82413	11.9685	0.00054108	0.00120454	14	50716244	50966935	rapgef2	Rap guanine nucleotide exchange factor (GEF) 2 [Source:ZFIN;Acc:ZDB-GENE-030131-6959]
comp10554_c0_seq2	0.33883	ENSDARG00000005551	1.56791	0.648846	6.84436	34.7042	3.83811e-09	1.83422e-08	21	28913671	28925825	hnrnph1l	heterogeneous nuclear ribonucleoprotein H1, like [Source:ZFIN;Acc:ZDB-GENE-030131-275]
comp41370_c0_seq1	0.362829	ENSDARG00000005551	1.56791	0.648846	6.84436	34.7042	3.83811e-09	1.83422e-08	21	28913671	28925825	hnrnph1l	heterogeneous nuclear ribonucleoprotein H1, like [Source:ZFIN;Acc:ZDB-GENE-030131-275]
comp33750_c0_seq1	5.27127	ENSDARG00000005590	1.97949	0.985127	2.78243	36.2028	1.77817e-09	8.87828e-09	2	10395903	10423736	mtf2	metal response element binding transcription factor 2 [Source:ZFIN;Acc:ZDB-GENE-060512-94]
comp33750_c0_seq1	5.27127	ENSDARG00000005590	1.97949	0.985127	2.78243	36.2028	1.77817e-09	8.87828e-09	2	10395903	10423736	mtf2	metal response element binding transcription factor 2 [Source:ZFIN;Acc:ZDB-GENE-060512-94]
comp33750_c0_seq2	5.27127	ENSDARG00000005590	1.97949	0.985127	2.78243	36.2028	1.77817e-09	8.87828e-09	2	10395903	10423736	mtf2	metal response element binding transcription factor 2 [Source:ZFIN;Acc:ZDB-GENE-060512-94]
comp33750_c0_seq3	8.04624	ENSDARG00000005590	1.97949	0.985127	2.78243	36.2028	1.77817e-09	8.87828e-09	2	10395903	10423736	mtf2	metal response element binding transcription factor 2 [Source:ZFIN;Acc:ZDB-GENE-060512-94]
comp33750_c0_seq4	7.93974	ENSDARG00000005590	1.97949	0.985127	2.78243	36.2028	1.77817e-09	8.87828e-09	2	10395903	10423736	mtf2	metal response element binding transcription factor 2 [Source:ZFIN;Acc:ZDB-GENE-060512-94]
comp33750_c0_seq5	1.27131	ENSDARG00000005590	1.97949	0.985127	2.78243	36.2028	1.77817e-09	8.87828e-09	2	10395903	10423736	mtf2	metal response element binding transcription factor 2 [Source:ZFIN;Acc:ZDB-GENE-060512-94]
comp33750_c0_seq5	1.27131	ENSDARG00000005590	1.97949	0.985127	2.78243	36.2028	1.77817e-09	8.87828e-09	2	10395903	10423736	mtf2	metal response element binding transcription factor 2 [Source:ZFIN;Acc:ZDB-GENE-060512-94]
comp33750_c0_seq6	0.973484	ENSDARG00000005590	1.97949	0.985127	2.78243	36.2028	1.77817e-09	8.87828e-09	2	10395903	10423736	mtf2	metal response element binding transcription factor 2 [Source:ZFIN;Acc:ZDB-GENE-060512-94]
comp33750_c0_seq8	0.030478	ENSDARG00000005590	1.97949	0.985127	2.78243	36.2028	1.77817e-09	8.87828e-09	2	10395903	10423736	mtf2	metal response element binding transcription factor 2 [Source:ZFIN;Acc:ZDB-GENE-060512-94]
comp16640_c0_seq1	2.25566	ENSDARG00000005619	2.48141	1.31116	1.58819	34.692	3.86211e-09	1.84361e-08	20	13797905	13808684	nek2	NIMA (never in mitosis gene a)-related kinase 2 [Source:ZFIN;Acc:ZDB-GENE-040426-752]
comp27198_c0_seq1	1.16824	ENSDARG00000005645	16.4392	4.03907	4.21089	259.456	2.2552e-58	2.7502e-56	10	32312906	32518450	robo3	roundabout homolog 3 [Source:ZFIN;Acc:ZDB-GENE-000209-4]
comp27198_c0_seq1	1.16824	ENSDARG00000005645	16.4392	4.03907	4.21089	259.456	2.2552e-58	2.7502e-56	10	32312906	32518450	robo3	roundabout homolog 3 [Source:ZFIN;Acc:ZDB-GENE-000209-4]
comp34436_c0_seq1	1.3001	ENSDARG00000005645	16.4392	4.03907	4.21089	259.456	2.2552e-58	2.7502e-56	10	32312906	32518450	robo3	roundabout homolog 3 [Source:ZFIN;Acc:ZDB-GENE-000209-4]
comp68462_c0_seq1	1.11407	ENSDARG00000005645	16.4392	4.03907	4.21089	259.456	2.2552e-58	2.7502e-56	10	32312906	32518450	robo3	roundabout homolog 3 [Source:ZFIN;Acc:ZDB-GENE-000209-4]
comp37182_c0_seq1	0.810883	ENSDARG00000005699	1.40245	0.487948	6.54081	15.3238	9.05659e-05	0.0002311	11	3585467	3597690	ddx19	DEAD/H (Asp-Glu-Ala-Asp/His) box polypeptide 19 (DBP5 homolog, yeast) [Source:ZFIN;Acc:ZDB-GENE-020419-30]
comp37182_c0_seq2	0.119442	ENSDARG00000005699	1.40245	0.487948	6.54081	15.3238	9.05659e-05	0.0002311	11	3585467	3597690	ddx19	DEAD/H (Asp-Glu-Ala-Asp/His) box polypeptide 19 (DBP5 homolog, yeast) [Source:ZFIN;Acc:ZDB-GENE-020419-30]
comp40439_c0_seq1	0.104617	ENSDARG00000005754	1.59488	0.67345	7.25802	23.1281	1.51556e-06	5.10945e-06	2	17349918	17718646	ptprfb	protein tyrosine phosphatase, receptor type, f, b [Source:ZFIN;Acc:ZDB-GENE-060503-530]
comp40439_c0_seq2	1.95501	ENSDARG00000005754	1.59488	0.67345	7.25802	23.1281	1.51556e-06	5.10945e-06	2	17349918	17718646	ptprfb	protein tyrosine phosphatase, receptor type, f, b [Source:ZFIN;Acc:ZDB-GENE-060503-530]
comp40439_c0_seq3	2.27225	ENSDARG00000005754	1.59488	0.67345	7.25802	23.1281	1.51556e-06	5.10945e-06	2	17349918	17718646	ptprfb	protein tyrosine phosphatase, receptor type, f, b [Source:ZFIN;Acc:ZDB-GENE-060503-530]
comp11500_c0_seq1	1.65575	ENSDARG00000005774	2.08663	1.06117	7.89478	48.7387	2.9243e-12	1.9749e-11	6	59558985	59576603	pl10	pl10 [Source:ZFIN;Acc:ZDB-GENE-980526-150]
comp16339_c0_seq1	0.355432	ENSDARG00000005774	2.08663	1.06117	7.89478	48.7387	2.9243e-12	1.9749e-11	6	59558985	59576603	pl10	pl10 [Source:ZFIN;Acc:ZDB-GENE-980526-150]
comp38600_c0_seq1	1.84545	ENSDARG00000005789	4.21491	2.0755	6.01038	250.958	1.6058e-56	1.8268e-54	20	13318055	13435784	enpp1	ectonucleotide pyrophosphatase/phosphodiesterase 1 [Source:ZFIN;Acc:ZDB-GENE-040724-172]
comp33806_c0_seq1	2.16252	ENSDARG00000005828	1.50636	0.591065	2.03456	4.92108	0.0265309	0.0427496	9	24781687	24788682	faima	Fas apoptotic inhibitory molecule a [Source:ZFIN;Acc:ZDB-GENE-040718-323]
comp20417_c0_seq1	0.924564	ENSDARG00000005867	1.54599	0.628531	4.33883	20.0206	7.66132e-06	2.31947e-05	16	31222897	31257577	gon4l	gon-4-like (C.elegans) [Source:ZFIN;Acc:ZDB-GENE-070117-2447]
comp44525_c0_seq1	0.502846	ENSDARG00000005867	1.54599	0.628531	4.33883	20.0206	7.66132e-06	2.31947e-05	16	31222897	31257577	gon4l	gon-4-like (C.elegans) [Source:ZFIN;Acc:ZDB-GENE-070117-2447]
comp6204_c0_seq1	0.665525	ENSDARG00000005867	1.54599	0.628531	4.33883	20.0206	7.66132e-06	2.31947e-05	16	31222897	31257577	gon4l	gon-4-like (C.elegans) [Source:ZFIN;Acc:ZDB-GENE-070117-2447]
comp40244_c0_seq1	0.278023	ENSDARG00000005941	1.27661	0.352313	6.10179	7.99033	0.00470277	0.00882212	2	30986804	31079129	yes1	v-yes-1 Yamaguchi sarcoma viral oncogene homolog 1 [Source:ZFIN;Acc:ZDB-GENE-050126-1]
comp36161_c0_seq1	9.12677	ENSDARG00000005944	1.27037	0.345246	6.80705	8.64319	0.00328286	0.00633801	6	53177553	53206835	gnb1b	guanine nucleotide binding protein (G protein), beta polypeptide 1b [Source:ZFIN;Acc:ZDB-GENE-040426-2855]
comp36161_c0_seq1	9.12677	ENSDARG00000005944	1.27037	0.345246	6.80705	8.64319	0.00328286	0.00633801	6	53177553	53206835	gnb1b	guanine nucleotide binding protein (G protein), beta polypeptide 1b [Source:ZFIN;Acc:ZDB-GENE-040426-2855]
comp36161_c0_seq2	10.1496	ENSDARG00000005944	1.27037	0.345246	6.80705	8.64319	0.00328286	0.00633801	6	53177553	53206835	gnb1b	guanine nucleotide binding protein (G protein), beta polypeptide 1b [Source:ZFIN;Acc:ZDB-GENE-040426-2855]
comp36161_c0_seq2	10.1496	ENSDARG00000005944	1.27037	0.345246	6.80705	8.64319	0.00328286	0.00633801	6	53177553	53206835	gnb1b	guanine nucleotide binding protein (G protein), beta polypeptide 1b [Source:ZFIN;Acc:ZDB-GENE-040426-2855]
comp36161_c0_seq3	0.789863	ENSDARG00000005944	1.27037	0.345246	6.80705	8.64319	0.00328286	0.00633801	6	53177553	53206835	gnb1b	guanine nucleotide binding protein (G protein), beta polypeptide 1b [Source:ZFIN;Acc:ZDB-GENE-040426-2855]
comp36161_c0_seq3	0.789863	ENSDARG00000005944	1.27037	0.345246	6.80705	8.64319	0.00328286	0.00633801	6	53177553	53206835	gnb1b	guanine nucleotide binding protein (G protein), beta polypeptide 1b [Source:ZFIN;Acc:ZDB-GENE-040426-2855]
comp37777_c0_seq1	10.391	ENSDARG00000005993	5.17795	2.37238	3.83079	132.609	1.1008e-30	3.6019e-29	7	51810285	51824630	prc1b	protein regulator of cytokinesis 1b [Source:ZFIN;Acc:ZDB-GENE-040426-777]
comp37777_c0_seq2	0.693343	ENSDARG00000005993	5.17795	2.37238	3.83079	132.609	1.1008e-30	3.6019e-29	7	51810285	51824630	prc1b	protein regulator of cytokinesis 1b [Source:ZFIN;Acc:ZDB-GENE-040426-777]
comp6512_c0_seq1	6.66276	ENSDARG00000006010	1.43325	0.519287	4.33515	12.3322	0.0004452	0.00100958	24	17809106	17816340	bmi1a	B lymphoma Mo-MLV insertion region 1a [Source:ZFIN;Acc:ZDB-GENE-030131-224]
comp6512_c0_seq2	0.0775736	ENSDARG00000006010	1.43325	0.519287	4.33515	12.3322	0.0004452	0.00100958	24	17809106	17816340	bmi1a	B lymphoma Mo-MLV insertion region 1a [Source:ZFIN;Acc:ZDB-GENE-030131-224]
comp36455_c0_seq1	1.01558	ENSDARG00000006029	2.30936	1.20749	4.57226	62.7664	2.3274e-15	2.1418e-14	4	6723923	6743481	lta4h	leukotriene A4 hydrolase [Source:ZFIN;Acc:ZDB-GENE-040426-2477]
comp25943_c0_seq1	8.2382	ENSDARG00000006038	2.06602	1.04685	4.10948	49.4656	2.0188e-12	1.3894e-11	4	2794209	2816316	aebp2	AE binding protein 2 [Source:ZFIN;Acc:ZDB-GENE-040426-2885]
comp33428_c0_seq1	0.118057	ENSDARG00000006040	1.57194	0.652548	5.51034	29.4764	5.66004e-08	2.32759e-07	6	9863332	9880112	cyp20a1	cytochrome P450, family 20, subfamily A, polypeptide 1 [Source:ZFIN;Acc:ZDB-GENE-040426-2646]
comp52928_c0_seq1	0.399798	ENSDARG00000006044	1.41222	0.497965	3.09575	9.69199	0.00185073	0.00373562	20	31335272	31453298	ust	uronyl-2-sulfotransferase [Source:ZFIN;Acc:ZDB-GENE-041001-163]
comp36685_c0_seq2	0.199603	ENSDARG00000006062	1.66962	0.739522	4.24969	25.7521	3.88208e-07	1.42497e-06	15	30135828	30154902	akap1b	A kinase (PRKA) anchor protein 1b [Source:ZFIN;Acc:ZDB-GENE-030131-6844]
comp38057_c0_seq1	5.27127	ENSDARG00000006124	1.30113	0.379763	6.13016	9.8716	0.0016785	0.00341686	8	38095710	38138758	kdm5c	lysine (K)-specific demethylase 5C [Source:ZFIN;Acc:ZDB-GENE-060810-94]
comp38057_c0_seq3	1.49601	ENSDARG00000006124	1.30113	0.379763	6.13016	9.8716	0.0016785	0.00341686	8	38095710	38138758	kdm5c	lysine (K)-specific demethylase 5C [Source:ZFIN;Acc:ZDB-GENE-060810-94]
comp38057_c0_seq5	1.52321	ENSDARG00000006124	1.30113	0.379763	6.13016	9.8716	0.0016785	0.00341686	8	38095710	38138758	kdm5c	lysine (K)-specific demethylase 5C [Source:ZFIN;Acc:ZDB-GENE-060810-94]
comp38057_c0_seq7	6.47215	ENSDARG00000006124	1.30113	0.379763	6.13016	9.8716	0.0016785	0.00341686	8	38095710	38138758	kdm5c	lysine (K)-specific demethylase 5C [Source:ZFIN;Acc:ZDB-GENE-060810-94]
comp34414_c0_seq1	1.30755	ENSDARG00000006128	6.12871	2.61558	3.9624	186.59	1.7646e-42	1.1038e-40	13	10546975	10638162	cep170a	centrosomal protein 170a [Source:ZFIN;Acc:ZDB-GENE-090312-109]
comp11106_c0_seq1	1.12828	ENSDARG00000006200	2.48835	1.31519	7.49739	69.2177	8.8174e-17	9.2204e-16	2	16534444	16574921	EIF4G1 (1 of 3)	eukaryotic translation initiation factor 4 gamma, 1 [Source:HGNC Symbol;Acc:HGNC:3296]
comp32377_c0_seq4	1.55215	ENSDARG00000006200	2.48835	1.31519	7.49739	69.2177	8.8174e-17	9.2204e-16	2	16534444	16574921	EIF4G1 (1 of 3)	eukaryotic translation initiation factor 4 gamma, 1 [Source:HGNC Symbol;Acc:HGNC:3296]
comp32377_c0_seq5	0.531247	ENSDARG00000006200	2.48835	1.31519	7.49739	69.2177	8.8174e-17	9.2204e-16	2	16534444	16574921	EIF4G1 (1 of 3)	eukaryotic translation initiation factor 4 gamma, 1 [Source:HGNC Symbol;Acc:HGNC:3296]
comp32377_c0_seq6	1.37823	ENSDARG00000006200	2.48835	1.31519	7.49739	69.2177	8.8174e-17	9.2204e-16	2	16534444	16574921	EIF4G1 (1 of 3)	eukaryotic translation initiation factor 4 gamma, 1 [Source:HGNC Symbol;Acc:HGNC:3296]
comp32377_c0_seq7	0.0657847	ENSDARG00000006200	2.48835	1.31519	7.49739	69.2177	8.8174e-17	9.2204e-16	2	16534444	16574921	EIF4G1 (1 of 3)	eukaryotic translation initiation factor 4 gamma, 1 [Source:HGNC Symbol;Acc:HGNC:3296]
comp32377_c0_seq8	1.2755	ENSDARG00000006200	2.48835	1.31519	7.49739	69.2177	8.8174e-17	9.2204e-16	2	16534444	16574921	EIF4G1 (1 of 3)	eukaryotic translation initiation factor 4 gamma, 1 [Source:HGNC Symbol;Acc:HGNC:3296]
comp32377_c0_seq9	1.8817	ENSDARG00000006200	2.48835	1.31519	7.49739	69.2177	8.8174e-17	9.2204e-16	2	16534444	16574921	EIF4G1 (1 of 3)	eukaryotic translation initiation factor 4 gamma, 1 [Source:HGNC Symbol;Acc:HGNC:3296]
comp41544_c0_seq1	0.490283	ENSDARG00000006219	1.42551	0.511475	6.28582	8.21912	0.00414512	0.00785863	11	4021604	4033144	gnl3	guanine nucleotide binding protein-like 3 (nucleolar) [Source:ZFIN;Acc:ZDB-GENE-030131-616]
comp26766_c0_seq1	0.691731	ENSDARG00000006242	1.96939	0.977752	7.37735	78.6498	7.4155e-19	9.4512e-18	11	11389226	11396293	ptp4a1	protein tyrosine phosphatase type IVA, member 1 [Source:ZFIN;Acc:ZDB-GENE-041121-11]
comp5372_c0_seq1	0.890474	ENSDARG00000006251	2.5589	1.35552	4.97565	99.751	1.7281e-23	3.3517e-22	21	10173106	10198973	ell2	elongation factor, RNA polymerase II, 2 [Source:ZFIN;Acc:ZDB-GENE-030131-1717]
comp40982_c0_seq6	8.43399	ENSDARG00000006257	1.30864	0.388069	4.96297	7.04839	0.00793366	0.0142416	10	15283756	15333718	vldlr	very low density lipoprotein receptor [Source:ZFIN;Acc:ZDB-GENE-040426-803]
comp40982_c0_seq6	8.43399	ENSDARG00000006257	1.30864	0.388069	4.96297	7.04839	0.00793366	0.0142416	10	15283756	15333718	vldlr	very low density lipoprotein receptor [Source:ZFIN;Acc:ZDB-GENE-040426-803]
comp40982_c0_seq6	8.43399	ENSDARG00000006257	1.30864	0.388069	4.96297	7.04839	0.00793366	0.0142416	10	15283756	15333718	vldlr	very low density lipoprotein receptor [Source:ZFIN;Acc:ZDB-GENE-040426-803]
comp40982_c0_seq6	8.43399	ENSDARG00000006257	1.30864	0.388069	4.96297	7.04839	0.00793366	0.0142416	10	15283756	15333718	vldlr	very low density lipoprotein receptor [Source:ZFIN;Acc:ZDB-GENE-040426-803]
comp40982_c0_seq6	8.43399	ENSDARG00000006257	1.30864	0.388069	4.96297	7.04839	0.00793366	0.0142416	10	15283756	15333718	vldlr	very low density lipoprotein receptor [Source:ZFIN;Acc:ZDB-GENE-040426-803]
comp39802_c0_seq1	1.25565	ENSDARG00000006353	6.38219	2.67405	6.32024	284.628	7.3624e-64	1.04e-61	23	33661296	33771832	itga5	integrin, alpha 5 (fibronectin receptor, alpha polypeptide) [Source:ZFIN;Acc:ZDB-GENE-031116-52]
comp24288_c0_seq2	0.147651	ENSDARG00000006389	1.40946	0.495145	3.41227	8.54122	0.00347192	0.00667482	10	14899576	14971855	smad2	MAD homolog 2 (Drosophila) [Source:ZFIN;Acc:ZDB-GENE-990603-7]
comp4670_c0_seq1	0.506557	ENSDARG00000006392	1.51337	0.597767	4.38721	17.9884	2.22252e-05	6.28424e-05	1	17825396	17834050	exosc9	exosome component 9 [Source:ZFIN;Acc:ZDB-GENE-041010-180]
comp43640_c0_seq1	0.84083	ENSDARG00000006399	1.24025	0.310629	7.91696	8.19962	0.00418993	0.00793469	15	24099992	24108443	ywhae1	tyrosine 3-monooxygenase/tryptophan 5-monooxygenase activation protein, epsilon polypeptide 1 [Source:ZFIN;Acc:ZDB-GENE-030131-779]
comp43676_c0_seq1	0.840284	ENSDARG00000006399	1.24025	0.310629	7.91696	8.19962	0.00418993	0.00793469	15	24099992	24108443	ywhae1	tyrosine 3-monooxygenase/tryptophan 5-monooxygenase activation protein, epsilon polypeptide 1 [Source:ZFIN;Acc:ZDB-GENE-030131-779]
comp40653_c0_seq2	0.385923	ENSDARG00000006477	1.27682	0.352553	5.30547	7.79473	0.00523988	0.00974237	6	40485415	40494373	ddi2	DNA-damage inducible protein 2 [Source:ZFIN;Acc:ZDB-GENE-031030-15]
comp40653_c0_seq2	0.385923	ENSDARG00000006477	1.27682	0.352553	5.30547	7.79473	0.00523988	0.00974237	6	40485415	40494373	ddi2	DNA-damage inducible protein 2 [Source:ZFIN;Acc:ZDB-GENE-031030-15]
comp27114_c0_seq1	0.209262	ENSDARG00000006524	1.38418	0.469035	5.93801	14.099	0.00017344	0.00042137	21	25422434	25452034	supt6h	suppressor of Ty 6 homolog [Source:ZFIN;Acc:ZDB-GENE-030131-7949]
comp40056_c0_seq1	1.33599	ENSDARG00000006553	1.38018	0.464857	6.86417	15.9037	6.66476e-05	0.00017359	3	32547722	32553097	rras	related RAS viral (r-ras) oncogene homolog [Source:ZFIN;Acc:ZDB-GENE-041010-217]
comp38616_c0_seq4	2.20785	ENSDARG00000006566	1.38105	0.465761	4.60929	19.8136	8.53716e-06	2.56949e-05	3	21156838	21185048	nlk1	nemo like kinase, type 1 [Source:ZFIN;Acc:ZDB-GENE-040701-1]
comp15440_c0_seq1	0.532986	ENSDARG00000006567	1.40694	0.492559	2.94441	7.56998	0.00593484	0.0109183	4	2508957	2513545	dus4l	dihydrouridine synthase 4-like (S. cerevisiae) [Source:ZFIN;Acc:ZDB-GENE-040801-233]
comp33412_c0_seq1	0.391073	ENSDARG00000006584	1.33729	0.419315	3.70868	6.53297	0.0105893	0.0185894	23	27832984	27848894	phf8	PHD finger protein 8 [Source:ZFIN;Acc:ZDB-GENE-060419-1]
comp33412_c0_seq1	0.391073	ENSDARG00000006584	1.33729	0.419315	3.70868	6.53297	0.0105893	0.0185894	23	27832984	27848894	phf8	PHD finger protein 8 [Source:ZFIN;Acc:ZDB-GENE-060419-1]
comp33769_c0_seq1	0.0740027	ENSDARG00000006604	2.2478	1.16851	1.60026	25.8711	3.65001e-07	1.34386e-06	21	20336190	20402660	pvrl3b	poliovirus receptor-related 3b [Source:ZFIN;Acc:ZDB-GENE-050327-14]
comp70985_c0_seq1	5.48831	ENSDARG00000006624	1.54025	0.623163	5.43413	29.9514	4.43015e-08	1.84238e-07	10	18907582	18936892	ppp2r2ab	protein phosphatase 2, regulatory subunit B, alpha b [Source:ZFIN;Acc:ZDB-GENE-030131-5474]
comp42925_c0_seq1	0.244946	ENSDARG00000006686	1.48259	0.568118	3.97949	12.7663	0.00035293	0.00081494	5	63052281	63110871	zmynd19	zinc finger, MYND domain containing 19 [Source:ZFIN;Acc:ZDB-GENE-030131-4460]
comp38343_c0_seq1	2.12197	ENSDARG00000006754	17.6086	4.13821	3.342	377.488	4.3848e-84	1.2185e-81	7	19994259	20096062	mllt3	myeloid/lymphoid or mixed lineage-leukemia translocation to 3 homolog (Drosophila) [Source:ZFIN;Acc:ZDB-GENE-050417-356]
comp38343_c0_seq1	2.12197	ENSDARG00000006754	17.6086	4.13821	3.342	377.488	4.3848e-84	1.2185e-81	7	19994259	20096062	mllt3	myeloid/lymphoid or mixed lineage-leukemia translocation to 3 homolog (Drosophila) [Source:ZFIN;Acc:ZDB-GENE-050417-356]
comp34986_c0_seq1	0.452871	ENSDARG00000006782	2.08231	1.05819	4.40738	53.9846	2.0207e-13	1.5527e-12	21	22075717	22132576	rb1	retinoblastoma 1 [Source:ZFIN;Acc:ZDB-GENE-040428-1]
comp31852_c0_seq2	1.47314	ENSDARG00000006812	1.49083	0.576121	5.85171	23.2176	1.44668e-06	4.89867e-06	20	46950028	46985046	wdr26b	WD repeat domain 26b [Source:ZFIN;Acc:ZDB-GENE-041014-277]
comp33761_c0_seq1	1.93603	ENSDARG00000006837	1.73865	0.79797	4.69998	14.1026	0.0001731	0.00042062	20	33333309	33338265	mycn	v-myc myelocytomatosis viral related oncogene, neuroblastoma derived (avian) [Source:ZFIN;Acc:ZDB-GENE-020711-1]
comp27060_c0_seq1	0.945281	ENSDARG00000006963	1.47558	0.561284	5.74561	19.0458	1.27615e-05	3.74711e-05	11	5552987	5574422	cse1l	chromosome segregation 1-like (S. cerevisiae) [Source:ZFIN;Acc:ZDB-GENE-990603-1]
comp40850_c0_seq2	6.41988	ENSDARG00000006982	4.80677	2.26507	5.91384	220.429	7.2916e-50	6.3385e-48	21	40051375	40054278	msxd	muscle segment homeobox D [Source:ZFIN;Acc:ZDB-GENE-980526-492]
comp40850_c0_seq2	6.41988	ENSDARG00000006982	4.80677	2.26507	5.91384	220.429	7.2916e-50	6.3385e-48	21	40051375	40054278	msxd	muscle segment homeobox D [Source:ZFIN;Acc:ZDB-GENE-980526-492]
comp40850_c0_seq2	6.41988	ENSDARG00000006982	4.80677	2.26507	5.91384	220.429	7.2916e-50	6.3385e-48	21	40051375	40054278	msxd	muscle segment homeobox D [Source:ZFIN;Acc:ZDB-GENE-980526-492]
comp26291_c0_seq1	0.231118	ENSDARG00000007034	1.46136	0.54731	6.52354	19.9025	8.14937e-06	2.4602e-05	5	56981112	57002504	hnrpkl	heterogeneous nuclear ribonucleoprotein K, like [Source:ZFIN;Acc:ZDB-GENE-040426-1923]
comp28353_c0_seq4	0.690205	ENSDARG00000007034	1.46136	0.54731	6.52354	19.9025	8.14937e-06	2.4602e-05	5	56981112	57002504	hnrpkl	heterogeneous nuclear ribonucleoprotein K, like [Source:ZFIN;Acc:ZDB-GENE-040426-1923]
comp37719_c0_seq2	0.103006	ENSDARG00000007034	1.46136	0.54731	6.52354	19.9025	8.14937e-06	2.4602e-05	5	56981112	57002504	hnrpkl	heterogeneous nuclear ribonucleoprotein K, like [Source:ZFIN;Acc:ZDB-GENE-040426-1923]
comp41453_c0_seq1	0.0991738	ENSDARG00000007034	1.46136	0.54731	6.52354	19.9025	8.14937e-06	2.4602e-05	5	56981112	57002504	hnrpkl	heterogeneous nuclear ribonucleoprotein K, like [Source:ZFIN;Acc:ZDB-GENE-040426-1923]
comp60731_c0_seq1	2.65234	ENSDARG00000007034	1.46136	0.54731	6.52354	19.9025	8.14937e-06	2.4602e-05	5	56981112	57002504	hnrpkl	heterogeneous nuclear ribonucleoprotein K, like [Source:ZFIN;Acc:ZDB-GENE-040426-1923]
comp75401_c0_seq1	1.15883	ENSDARG00000007034	1.46136	0.54731	6.52354	19.9025	8.14937e-06	2.4602e-05	5	56981112	57002504	hnrpkl	heterogeneous nuclear ribonucleoprotein K, like [Source:ZFIN;Acc:ZDB-GENE-040426-1923]
comp37696_c0_seq2	0.967917	ENSDARG00000007081	1.25717	0.330174	4.75522	7.03251	0.0080043	0.0143583	22	20726756	20740006	pias4a	protein inhibitor of activated STAT, 4a [Source:ZFIN;Acc:ZDB-GENE-040426-2734]
comp39464_c0_seq1	1.25447	ENSDARG00000007099	1.57251	0.65307	6.57882	12.6124	0.0003832	0.00087873	9	47606307	47616531	cx43.4	connexin 43.4 [Source:ZFIN;Acc:ZDB-GENE-990415-38]
comp39464_c0_seq1	1.25447	ENSDARG00000007099	1.57251	0.65307	6.57882	12.6124	0.0003832	0.00087873	9	47606307	47616531	cx43.4	connexin 43.4 [Source:ZFIN;Acc:ZDB-GENE-990415-38]
comp39464_c0_seq2	2.4331	ENSDARG00000007099	1.57251	0.65307	6.57882	12.6124	0.0003832	0.00087873	9	47606307	47616531	cx43.4	connexin 43.4 [Source:ZFIN;Acc:ZDB-GENE-990415-38]
comp39464_c0_seq2	2.4331	ENSDARG00000007099	1.57251	0.65307	6.57882	12.6124	0.0003832	0.00087873	9	47606307	47616531	cx43.4	connexin 43.4 [Source:ZFIN;Acc:ZDB-GENE-990415-38]
comp39464_c0_seq3	1.52531	ENSDARG00000007099	1.57251	0.65307	6.57882	12.6124	0.0003832	0.00087873	9	47606307	47616531	cx43.4	connexin 43.4 [Source:ZFIN;Acc:ZDB-GENE-990415-38]
comp39464_c0_seq3	1.52531	ENSDARG00000007099	1.57251	0.65307	6.57882	12.6124	0.0003832	0.00087873	9	47606307	47616531	cx43.4	connexin 43.4 [Source:ZFIN;Acc:ZDB-GENE-990415-38]
comp39464_c0_seq4	2.76279	ENSDARG00000007099	1.57251	0.65307	6.57882	12.6124	0.0003832	0.00087873	9	47606307	47616531	cx43.4	connexin 43.4 [Source:ZFIN;Acc:ZDB-GENE-990415-38]
comp39464_c0_seq4	2.76279	ENSDARG00000007099	1.57251	0.65307	6.57882	12.6124	0.0003832	0.00087873	9	47606307	47616531	cx43.4	connexin 43.4 [Source:ZFIN;Acc:ZDB-GENE-990415-38]
comp39464_c0_seq6	1.8415	ENSDARG00000007099	1.57251	0.65307	6.57882	12.6124	0.0003832	0.00087873	9	47606307	47616531	cx43.4	connexin 43.4 [Source:ZFIN;Acc:ZDB-GENE-990415-38]
comp39464_c0_seq6	1.8415	ENSDARG00000007099	1.57251	0.65307	6.57882	12.6124	0.0003832	0.00087873	9	47606307	47616531	cx43.4	connexin 43.4 [Source:ZFIN;Acc:ZDB-GENE-990415-38]
comp14795_c0_seq1	7.30149	ENSDARG00000007125	1.37657	0.461075	3.38233	8.67742	0.00322176	0.00622857	8	7469968	7488370	asb6	ankyrin repeat and SOCS box containing 6 [Source:ZFIN;Acc:ZDB-GENE-050522-338]
comp41684_c0_seq1	1.18626	ENSDARG00000007130	1.33531	0.417174	4.95904	5.09484	0.0239971	0.0390229	11	42951291	42959301	mrto4	mRNA turnover 4 homolog (S. cerevisiae) [Source:ZFIN;Acc:ZDB-GENE-050417-142]
comp21663_c0_seq1	0.568053	ENSDARG00000007172	4.07349	2.02627	4.02875	117.892	1.8311e-27	4.7678e-26	8	9764702	10115344	plxna3	plexin A3 [Source:ZFIN;Acc:ZDB-GENE-070613-1]
comp37859_c0_seq3	2.29974	ENSDARG00000007172	4.07349	2.02627	4.02875	117.892	1.8311e-27	4.7678e-26	8	9764702	10115344	plxna3	plexin A3 [Source:ZFIN;Acc:ZDB-GENE-070613-1]
comp4016_c0_seq1	2.4522	ENSDARG00000007172	4.07349	2.02627	4.02875	117.892	1.8311e-27	4.7678e-26	8	9764702	10115344	plxna3	plexin A3 [Source:ZFIN;Acc:ZDB-GENE-070613-1]
comp44363_c0_seq1	0.577303	ENSDARG00000007172	4.07349	2.02627	4.02875	117.892	1.8311e-27	4.7678e-26	8	9764702	10115344	plxna3	plexin A3 [Source:ZFIN;Acc:ZDB-GENE-070613-1]
comp5351_c0_seq1	1.05488	ENSDARG00000007172	4.07349	2.02627	4.02875	117.892	1.8311e-27	4.7678e-26	8	9764702	10115344	plxna3	plexin A3 [Source:ZFIN;Acc:ZDB-GENE-070613-1]
comp7174_c0_seq1	0.640424	ENSDARG00000007172	4.07349	2.02627	4.02875	117.892	1.8311e-27	4.7678e-26	8	9764702	10115344	plxna3	plexin A3 [Source:ZFIN;Acc:ZDB-GENE-070613-1]
comp39644_c0_seq1	0.0429089	ENSDARG00000007177	3.82919	1.93704	0.140798	24.3606	7.98874e-07	2.80394e-06	15	14248	19010	CABZ01088933.1	Uncharacterized protein [Source:UniProtKB/TrEMBL;Acc:E7F3Q0]
comp39644_c0_seq1	0.0429089	ENSDARG00000007177	3.82919	1.93704	0.140798	24.3606	7.98874e-07	2.80394e-06	15	14248	19010	CABZ01088933.1	Uncharacterized protein [Source:UniProtKB/TrEMBL;Acc:E7F3Q0]
comp39644_c0_seq2	0.0415314	ENSDARG00000007177	3.82919	1.93704	0.140798	24.3606	7.98874e-07	2.80394e-06	15	14248	19010	CABZ01088933.1	Uncharacterized protein [Source:UniProtKB/TrEMBL;Acc:E7F3Q0]
comp39644_c0_seq2	0.0415314	ENSDARG00000007177	3.82919	1.93704	0.140798	24.3606	7.98874e-07	2.80394e-06	15	14248	19010	CABZ01088933.1	Uncharacterized protein [Source:UniProtKB/TrEMBL;Acc:E7F3Q0]
comp40104_c0_seq1	0.359029	ENSDARG00000007179	1.23381	0.303123	5.11328	5.99765	0.0143249	0.0244067	20	31454727	31769725	sash1a	SAM and SH3 domain containing 1a [Source:ZFIN;Acc:ZDB-GENE-030131-9960]
comp53531_c0_seq1	0.74162	ENSDARG00000007179	1.23381	0.303123	5.11328	5.99765	0.0143249	0.0244067	20	31454727	31769725	sash1a	SAM and SH3 domain containing 1a [Source:ZFIN;Acc:ZDB-GENE-030131-9960]
comp30470_c0_seq1	0.540588	ENSDARG00000007207	5.31512	2.4101	2.69749	123.956	8.6116e-29	2.4329e-27	11	2521203	2527357	cnpy2	canopy 2 [Source:ZFIN;Acc:ZDB-GENE-060315-4]
comp34245_c0_seq1	0.316177	ENSDARG00000007219	2.38127	1.25173	7.18774	72.9981	1.2977e-17	1.4695e-16	13	36722687	36793101	actn1	actinin, alpha 1 [Source:ZFIN;Acc:ZDB-GENE-081113-4]
comp38116_c0_seq3	0.31868	ENSDARG00000007219	2.38127	1.25173	7.18774	72.9981	1.2977e-17	1.4695e-16	13	36722687	36793101	actn1	actinin, alpha 1 [Source:ZFIN;Acc:ZDB-GENE-081113-4]
comp39189_c0_seq3	1.47032	ENSDARG00000007221	3.09095	1.62805	4.64488	109.953	1.0035e-25	2.3302e-24	20	39384438	39392715	pbk	PDZ binding kinase [Source:ZFIN;Acc:ZDB-GENE-030523-2]
comp35511_c0_seq1	0.111346	ENSDARG00000007231	1.46245	0.548392	4.45269	15.9246	6.59147e-05	0.00017179	6	27222693	27323929	ryk	receptor-like tyrosine kinase [Source:ZFIN;Acc:ZDB-GENE-070209-277]
comp28784_c0_seq1	2.63206	ENSDARG00000007278	4.93505	2.30307	2.13823	69.1656	9.0532e-17	9.4613e-16	11	10452631	10520382	ect2	epithelial cell transforming sequence 2 oncogene [Source:ZFIN;Acc:ZDB-GENE-040831-2]
comp39724_c0_seq1	0.784482	ENSDARG00000007279	1.69655	0.762602	5.24248	53.9387	2.0684e-13	1.586e-12	21	39578668	39586873	yipf5	Yip1 domain family, member 5 [Source:ZFIN;Acc:ZDB-GENE-040426-1057]
comp36977_c0_seq1	1.97482	ENSDARG00000007315	2.76302	1.46625	3.51815	91.5826	1.0703e-21	1.7479e-20	4	15925906	15944520	tmpoa	thymopoietin a [Source:ZFIN;Acc:ZDB-GENE-030131-6003]
comp36977_c0_seq2	2.41118	ENSDARG00000007315	2.76302	1.46625	3.51815	91.5826	1.0703e-21	1.7479e-20	4	15925906	15944520	tmpoa	thymopoietin a [Source:ZFIN;Acc:ZDB-GENE-030131-6003]
comp36977_c0_seq3	1.15669	ENSDARG00000007315	2.76302	1.46625	3.51815	91.5826	1.0703e-21	1.7479e-20	4	15925906	15944520	tmpoa	thymopoietin a [Source:ZFIN;Acc:ZDB-GENE-030131-6003]
comp50601_c0_seq1	1.89752	ENSDARG00000007315	2.76302	1.46625	3.51815	91.5826	1.0703e-21	1.7479e-20	4	15925906	15944520	tmpoa	thymopoietin a [Source:ZFIN;Acc:ZDB-GENE-030131-6003]
comp53790_c0_seq1	0.252006	ENSDARG00000007354	1.73218	0.792586	9.56072	34.0906	5.26035e-09	2.46321e-08	25	31332644	31347155	pdia3	protein disulfide isomerase family A, member 3 [Source:ZFIN;Acc:ZDB-GENE-031002-9]
comp65414_c0_seq1	0.180954	ENSDARG00000007354	1.73218	0.792586	9.56072	34.0906	5.26035e-09	2.46321e-08	25	31332644	31347155	pdia3	protein disulfide isomerase family A, member 3 [Source:ZFIN;Acc:ZDB-GENE-031002-9]
comp41209_c0_seq19	11.1248	ENSDARG00000007370	2.45814	1.29757	1.03156	20.3145	6.57e-06	2.00772e-05	7	26728112	26864332	dysf	dysferlin, limb girdle muscular dystrophy 2B (autosomal recessive) [Source:ZFIN;Acc:ZDB-GENE-070501-1]
comp41209_c0_seq23	6.47215	ENSDARG00000007370	2.45814	1.29757	1.03156	20.3145	6.57e-06	2.00772e-05	7	26728112	26864332	dysf	dysferlin, limb girdle muscular dystrophy 2B (autosomal recessive) [Source:ZFIN;Acc:ZDB-GENE-070501-1]
comp41209_c0_seq32	10.8684	ENSDARG00000007370	2.45814	1.29757	1.03156	20.3145	6.57e-06	2.00772e-05	7	26728112	26864332	dysf	dysferlin, limb girdle muscular dystrophy 2B (autosomal recessive) [Source:ZFIN;Acc:ZDB-GENE-070501-1]
comp41209_c0_seq4	0.630582	ENSDARG00000007370	2.45814	1.29757	1.03156	20.3145	6.57e-06	2.00772e-05	7	26728112	26864332	dysf	dysferlin, limb girdle muscular dystrophy 2B (autosomal recessive) [Source:ZFIN;Acc:ZDB-GENE-070501-1]
comp41209_c0_seq5	0.0410336	ENSDARG00000007370	2.45814	1.29757	1.03156	20.3145	6.57e-06	2.00772e-05	7	26728112	26864332	dysf	dysferlin, limb girdle muscular dystrophy 2B (autosomal recessive) [Source:ZFIN;Acc:ZDB-GENE-070501-1]
comp41209_c0_seq8	6.12865	ENSDARG00000007370	2.45814	1.29757	1.03156	20.3145	6.57e-06	2.00772e-05	7	26728112	26864332	dysf	dysferlin, limb girdle muscular dystrophy 2B (autosomal recessive) [Source:ZFIN;Acc:ZDB-GENE-070501-1]
comp16273_c0_seq1	1.08816	ENSDARG00000007377	2.44991	1.29273	7.59693	14.0938	0.00017392	0.00042242	17	52270218	52283861	odc1	ornithine decarboxylase 1 [Source:ZFIN;Acc:ZDB-GENE-010816-1]
comp66057_c0_seq1	0.875695	ENSDARG00000007377	2.44991	1.29273	7.59693	14.0938	0.00017392	0.00042242	17	52270218	52283861	odc1	ornithine decarboxylase 1 [Source:ZFIN;Acc:ZDB-GENE-010816-1]
comp38358_c0_seq1	0.174461	ENSDARG00000007383	2.06196	1.04402	3.81615	50.2934	1.324e-12	9.2891e-12	18	44579557	44591915	kcnk6	potassium channel, subfamily K, member 6 [Source:ZFIN;Acc:ZDB-GENE-050309-213]
comp38358_c0_seq1	0.174461	ENSDARG00000007383	2.06196	1.04402	3.81615	50.2934	1.324e-12	9.2891e-12	18	44579557	44591915	kcnk6	potassium channel, subfamily K, member 6 [Source:ZFIN;Acc:ZDB-GENE-050309-213]
comp38358_c0_seq2	0.127089	ENSDARG00000007383	2.06196	1.04402	3.81615	50.2934	1.324e-12	9.2891e-12	18	44579557	44591915	kcnk6	potassium channel, subfamily K, member 6 [Source:ZFIN;Acc:ZDB-GENE-050309-213]
comp38358_c0_seq2	0.127089	ENSDARG00000007383	2.06196	1.04402	3.81615	50.2934	1.324e-12	9.2891e-12	18	44579557	44591915	kcnk6	potassium channel, subfamily K, member 6 [Source:ZFIN;Acc:ZDB-GENE-050309-213]
comp69381_c0_seq1	0.868414	ENSDARG00000007385	1.46708	0.552949	8.48689	20.3241	6.53706e-06	1.999e-05	7	60624250	60632207	cct7	chaperonin containing TCP1, subunit 7 (eta) [Source:ZFIN;Acc:ZDB-GENE-020419-7]
comp6952_c0_seq1	0.530326	ENSDARG00000007413	1.40847	0.494132	4.24432	9.20505	0.00241349	0.00477421	4	1506153	1543402	arid2	AT rich interactive domain 2 (ARID, RFX-like) [Source:ZFIN;Acc:ZDB-GENE-030131-6311]
comp34323_c0_seq1	0.67738	ENSDARG00000007429	1.32545	0.406486	3.88951	11.3249	0.00076475	0.00165496	5	34108136	34116636	ndor1	NADPH dependent diflavin oxidoreductase 1 [Source:ZFIN;Acc:ZDB-GENE-040426-1555]
comp20544_c0_seq1	1.34388	ENSDARG00000007461	4.69102	2.2299	3.93735	203.151	4.288e-46	3.202e-44	18	12311302	12505454	srgap1	SLIT-ROBO Rho GTPase activating protein 1 [Source:ZFIN;Acc:ZDB-GENE-050420-284]
comp27676_c0_seq1	0.99826	ENSDARG00000007461	4.69102	2.2299	3.93735	203.151	4.288e-46	3.202e-44	18	12311302	12505454	srgap1	SLIT-ROBO Rho GTPase activating protein 1 [Source:ZFIN;Acc:ZDB-GENE-050420-284]
comp50595_c0_seq1	0.677035	ENSDARG00000007461	4.69102	2.2299	3.93735	203.151	4.288e-46	3.202e-44	18	12311302	12505454	srgap1	SLIT-ROBO Rho GTPase activating protein 1 [Source:ZFIN;Acc:ZDB-GENE-050420-284]
comp14490_c0_seq1	1.14729	ENSDARG00000007678	5.98572	2.58152	4.06601	139.427	3.5523e-32	1.2441e-30	1	10962667	11031476	ttyh3b	tweety homolog 3b (Drosophila) [Source:ZFIN;Acc:ZDB-GENE-051120-105]
comp41266_c0_seq1	0.702255	ENSDARG00000007678	5.98572	2.58152	4.06601	139.427	3.5523e-32	1.2441e-30	1	10962667	11031476	ttyh3b	tweety homolog 3b (Drosophila) [Source:ZFIN;Acc:ZDB-GENE-051120-105]
comp41266_c0_seq1	0.702255	ENSDARG00000007678	5.98572	2.58152	4.06601	139.427	3.5523e-32	1.2441e-30	1	10962667	11031476	ttyh3b	tweety homolog 3b (Drosophila) [Source:ZFIN;Acc:ZDB-GENE-051120-105]
comp41266_c0_seq2	6.32416	ENSDARG00000007678	5.98572	2.58152	4.06601	139.427	3.5523e-32	1.2441e-30	1	10962667	11031476	ttyh3b	tweety homolog 3b (Drosophila) [Source:ZFIN;Acc:ZDB-GENE-051120-105]
comp41266_c0_seq2	6.32416	ENSDARG00000007678	5.98572	2.58152	4.06601	139.427	3.5523e-32	1.2441e-30	1	10962667	11031476	ttyh3b	tweety homolog 3b (Drosophila) [Source:ZFIN;Acc:ZDB-GENE-051120-105]
comp16247_c0_seq1	2.3719	ENSDARG00000007755	1.41462	0.500412	4.85827	17.3107	3.174e-05	8.7255e-05	25	6634147	6645716	wdr61	WD repeat domain 61 [Source:ZFIN;Acc:ZDB-GENE-040426-1851]
comp41365_c0_seq1	1.48242	ENSDARG00000007836	5.78089	2.53129	8.73014	277.121	3.1837e-62	4.283e-60	5	46423373	46429502	ctsla	cathepsin La [Source:ZFIN;Acc:ZDB-GENE-030131-106]
comp15650_c0_seq2	0.510125	ENSDARG00000007885	1.89841	0.924789	1.65786	13.1269	0.00029109	0.00068143	13	26927787	27004687	fancl	Fanconi anemia, complementation group L [Source:ZFIN;Acc:ZDB-GENE-040426-1045]
comp15650_c0_seq2	0.510125	ENSDARG00000007885	1.89841	0.924789	1.65786	13.1269	0.00029109	0.00068143	13	26927787	27004687	fancl	Fanconi anemia, complementation group L [Source:ZFIN;Acc:ZDB-GENE-040426-1045]
comp39443_c0_seq1	2.5719	ENSDARG00000007889	1.38257	0.467347	3.7933	7.84416	0.00509852	0.00950247	15	43673437	43704576	csf1ra	colony stimulating factor 1 receptor, a [Source:ZFIN;Acc:ZDB-GENE-001205-1]
comp37202_c0_seq1	1.39571	ENSDARG00000007955	1.65492	0.726766	5.3651	18.4113	1.78e-05	5.11477e-05	11	1302660	1357500	iars	isoleucyl-tRNA synthetase [Source:ZFIN;Acc:ZDB-GENE-030131-6325]
comp10518_c0_seq1	2.37265	ENSDARG00000007960	1.66474	0.735301	8.89353	29.2688	6.30029e-08	2.56969e-07	14	6928619	6932434	hnrnpaba	heterogeneous nuclear ribonucleoprotein A/Ba [Source:ZFIN;Acc:ZDB-GENE-030131-185]
comp10518_c0_seq2	1.05253	ENSDARG00000007960	1.66474	0.735301	8.89353	29.2688	6.30029e-08	2.56969e-07	14	6928619	6932434	hnrnpaba	heterogeneous nuclear ribonucleoprotein A/Ba [Source:ZFIN;Acc:ZDB-GENE-030131-185]
comp50143_c0_seq1	1.33948	ENSDARG00000007960	1.66474	0.735301	8.89353	29.2688	6.30029e-08	2.56969e-07	14	6928619	6932434	hnrnpaba	heterogeneous nuclear ribonucleoprotein A/Ba [Source:ZFIN;Acc:ZDB-GENE-030131-185]
comp16392_c0_seq1	1.38708	ENSDARG00000007971	3.22626	1.68986	4.2111	84.0273	4.8798e-20	6.9511e-19	19	8457561	8460768	cks1b	CDC28 protein kinase regulatory subunit 1B [Source:ZFIN;Acc:ZDB-GENE-040801-112]
comp9807_c0_seq1	1.56339	ENSDARG00000007971	3.22626	1.68986	4.2111	84.0273	4.8798e-20	6.9511e-19	19	8457561	8460768	cks1b	CDC28 protein kinase regulatory subunit 1B [Source:ZFIN;Acc:ZDB-GENE-040801-112]
comp20039_c0_seq1	0.644988	ENSDARG00000007996	2.16957	1.11741	2.11652	25.3597	4.75758e-07	1.72697e-06	9	35290637	35323921	pou2f1b	POU class 2 homeobox 1b [Source:ZFIN;Acc:ZDB-GENE-030131-2422]
comp20039_c0_seq2	8.5104	ENSDARG00000007996	2.16957	1.11741	2.11652	25.3597	4.75758e-07	1.72697e-06	9	35290637	35323921	pou2f1b	POU class 2 homeobox 1b [Source:ZFIN;Acc:ZDB-GENE-030131-2422]
comp35370_c0_seq1	2.03654	ENSDARG00000008022	2.51383	1.32989	2.1217	41.2152	1.3636e-10	7.7048e-10	7	33311274	33356363	kif18a	kinesin family member 18A [Source:ZFIN;Acc:ZDB-GENE-040426-862]
comp53979_c0_seq1	5.67693	ENSDARG00000008022	2.51383	1.32989	2.1217	41.2152	1.3636e-10	7.7048e-10	7	33311274	33356363	kif18a	kinesin family member 18A [Source:ZFIN;Acc:ZDB-GENE-040426-862]
comp54252_c0_seq1	2.52204	ENSDARG00000008022	2.51383	1.32989	2.1217	41.2152	1.3636e-10	7.7048e-10	7	33311274	33356363	kif18a	kinesin family member 18A [Source:ZFIN;Acc:ZDB-GENE-040426-862]
comp58283_c0_seq1	1.73747	ENSDARG00000008022	2.51383	1.32989	2.1217	41.2152	1.3636e-10	7.7048e-10	7	33311274	33356363	kif18a	kinesin family member 18A [Source:ZFIN;Acc:ZDB-GENE-040426-862]
comp71382_c0_seq1	4.70486	ENSDARG00000008022	2.51383	1.32989	2.1217	41.2152	1.3636e-10	7.7048e-10	7	33311274	33356363	kif18a	kinesin family member 18A [Source:ZFIN;Acc:ZDB-GENE-040426-862]
comp73508_c0_seq1	5.67693	ENSDARG00000008022	2.51383	1.32989	2.1217	41.2152	1.3636e-10	7.7048e-10	7	33311274	33356363	kif18a	kinesin family member 18A [Source:ZFIN;Acc:ZDB-GENE-040426-862]
comp41581_c0_seq1	0.248493	ENSDARG00000008052	1.49762	0.582675	5.30512	21.3744	3.77778e-06	1.20574e-05	19	30610950	30615328	nudc	nuclear distribution gene C homolog [Source:ZFIN;Acc:ZDB-GENE-040426-899]
comp40974_c0_seq2	0.75712	ENSDARG00000008153	1.90049	0.926374	3.82745	39.2836	3.6651e-10	1.97729e-09	5	54768240	54817032	serinc5	serine incorporator 5 [Source:ZFIN;Acc:ZDB-GENE-040426-2918]
comp40974_c0_seq2	0.75712	ENSDARG00000008153	1.90049	0.926374	3.82745	39.2836	3.6651e-10	1.97729e-09	5	54768240	54817032	serinc5	serine incorporator 5 [Source:ZFIN;Acc:ZDB-GENE-040426-2918]
comp15047_c0_seq1	1.75744	ENSDARG00000008184	1.37843	0.463024	5.83774	12.0241	0.00052518	0.00117167	20	52097283	52170673	mia3	melanoma inhibitory activity family, member 3 [Source:ZFIN;Acc:ZDB-GENE-041014-270]
comp33462_c0_seq1	1.80227	ENSDARG00000008184	1.37843	0.463024	5.83774	12.0241	0.00052518	0.00117167	20	52097283	52170673	mia3	melanoma inhibitory activity family, member 3 [Source:ZFIN;Acc:ZDB-GENE-041014-270]
comp35898_c0_seq1	0.323248	ENSDARG00000008184	1.37843	0.463024	5.83774	12.0241	0.00052518	0.00117167	20	52097283	52170673	mia3	melanoma inhibitory activity family, member 3 [Source:ZFIN;Acc:ZDB-GENE-041014-270]
comp35898_c0_seq3	0.0848776	ENSDARG00000008184	1.37843	0.463024	5.83774	12.0241	0.00052518	0.00117167	20	52097283	52170673	mia3	melanoma inhibitory activity family, member 3 [Source:ZFIN;Acc:ZDB-GENE-041014-270]
comp35898_c0_seq4	2.28589	ENSDARG00000008184	1.37843	0.463024	5.83774	12.0241	0.00052518	0.00117167	20	52097283	52170673	mia3	melanoma inhibitory activity family, member 3 [Source:ZFIN;Acc:ZDB-GENE-041014-270]
comp15316_c0_seq2	0.207693	ENSDARG00000008188	1.29826	0.376584	6.48915	9.72246	0.0018203	0.00367813	7	23976996	23987907	sf1	splicing factor 1 [Source:ZFIN;Acc:ZDB-GENE-030131-2492]
comp35060_c0_seq3	1.27907	ENSDARG00000008247	2.39514	1.26011	4.34452	72.309	1.8401e-17	2.0548e-16	10	38416881	38465277	vezf1a	vascular endothelial zinc finger 1a [Source:ZFIN;Acc:ZDB-GENE-040108-4]
comp58409_c0_seq1	0.935788	ENSDARG00000008247	2.39514	1.26011	4.34452	72.309	1.8401e-17	2.0548e-16	10	38416881	38465277	vezf1a	vascular endothelial zinc finger 1a [Source:ZFIN;Acc:ZDB-GENE-040108-4]
comp25093_c0_seq1	0.766403	ENSDARG00000008278	10.128	3.34028	2.62822	176.881	2.3248e-40	1.3006e-38	7	26146924	26161813	rcor2	REST corepressor 2 [Source:ZFIN;Acc:ZDB-GENE-040426-1812]
comp25093_c0_seq2	7.464	ENSDARG00000008278	10.128	3.34028	2.62822	176.881	2.3248e-40	1.3006e-38	7	26146924	26161813	rcor2	REST corepressor 2 [Source:ZFIN;Acc:ZDB-GENE-040426-1812]
comp30269_c0_seq2	1.7414	ENSDARG00000008287	4.55837	2.18852	4.92107	185.402	3.2061e-42	1.9835e-40	1	17317642	17333963	fam114a1	family with sequence similarity 114, member A1 [Source:ZFIN;Acc:ZDB-GENE-070410-52]
comp66811_c0_seq1	0.760951	ENSDARG00000008359	2.00434	1.00313	7.52309	45.509	1.5194e-11	9.571e-11	24	31349968	31374453	cnn3a	calponin 3, acidic a [Source:ZFIN;Acc:ZDB-GENE-030131-5130]
comp15733_c0_seq1	0.813122	ENSDARG00000008380	1.34862	0.431481	5.96786	16.3273	5.32913e-05	0.00014112	7	39134401	39147445	brd7	bromodomain containing 7 [Source:ZFIN;Acc:ZDB-GENE-040426-2687]
comp22688_c0_seq1	0.132716	ENSDARG00000008384	1.32529	0.406305	4.13419	7.5655	0.00594961	0.0109431	8	7930067	7981022	hdac6	histone deacetylase 6 [Source:ZFIN;Acc:ZDB-GENE-030131-3232]
comp22773_c0_seq1	0.427156	ENSDARG00000008384	1.32529	0.406305	4.13419	7.5655	0.00594961	0.0109431	8	7930067	7981022	hdac6	histone deacetylase 6 [Source:ZFIN;Acc:ZDB-GENE-030131-3232]
comp43907_c0_seq1	0.319303	ENSDARG00000008384	1.32529	0.406305	4.13419	7.5655	0.00594961	0.0109431	8	7930067	7981022	hdac6	histone deacetylase 6 [Source:ZFIN;Acc:ZDB-GENE-030131-3232]
comp40776_c0_seq1	1.67141	ENSDARG00000008388	8.04293	3.00772	8.47615	529.407	3.801e-117	2.801e-114	2	37864076	37886399	mmp14b	matrix metalloproteinase 14b (membrane-inserted) [Source:ZFIN;Acc:ZDB-GENE-030901-2]
comp24950_c0_seq1	0.53886	ENSDARG00000008487	1.39826	0.483631	2.96213	8.28935	0.00398782	0.0075833	1	10008204	10258954	dmd	dystrophin [Source:ZFIN;Acc:ZDB-GENE-010426-1]
comp40761_c0_seq2	0.889815	ENSDARG00000008487	1.39826	0.483631	2.96213	8.28935	0.00398782	0.0075833	1	10008204	10258954	dmd	dystrophin [Source:ZFIN;Acc:ZDB-GENE-010426-1]
comp7355_c0_seq1	0.9967	ENSDARG00000008487	1.39826	0.483631	2.96213	8.28935	0.00398782	0.0075833	1	10008204	10258954	dmd	dystrophin [Source:ZFIN;Acc:ZDB-GENE-010426-1]
comp29165_c0_seq1	0.553467	ENSDARG00000008573	1.32964	0.411032	4.86453	8.6894	0.00320066	0.00619271	20	15897505	15962901	fam20b	family with sequence similarity 20, member B (H. sapiens) [Source:ZFIN;Acc:ZDB-GENE-040724-125]
comp39863_c0_seq2	0.583752	ENSDARG00000008593	1.87534	0.907154	2.67979	16.5854	4.65067e-05	0.00012434	20	32877348	33213780	nbas	neuroblastoma amplified sequence [Source:ZFIN;Acc:ZDB-GENE-041014-367]
comp33581_c0_seq1	0.123279	ENSDARG00000008680	1.36561	0.449545	7.11943	10.7489	0.00104339	0.00220695	19	49796246	49809511	kpnb1	karyopherin (importin) beta 1 [Source:ZFIN;Acc:ZDB-GENE-030131-2579]
comp35185_c0_seq1	0.637957	ENSDARG00000008805	2.55357	1.35251	4.29148	102.467	4.3851e-24	8.9882e-23	17	49469445	49495622	orc3	origin recognition complex, subunit 3 [Source:ZFIN;Acc:ZDB-GENE-030131-6247]
comp26003_c0_seq1	0.698236	ENSDARG00000008811	3.74422	1.90467	5.07944	167.795	2.2425e-38	1.1246e-36	7	45596171	45609228	cmtm3	CKLF-like MARVEL transmembrane domain containing 3 [Source:ZFIN;Acc:ZDB-GENE-040801-206]
comp31870_c0_seq1	0.136121	ENSDARG00000008884	1.34776	0.430564	4.63631	8.06279	0.00451834	0.00851194	14	32379801	32391422	hprt1	hypoxanthine phosphoribosyltransferase 1 [Source:ZFIN;Acc:ZDB-GENE-040426-1918]
comp39788_c0_seq1	3.26693	ENSDARG00000008931	1.38446	0.469327	3.93726	7.3387	0.00674858	0.0122781	8	38143125	38156051	renbp	renin binding protein [Source:ZFIN;Acc:ZDB-GENE-041212-34]
comp39788_c0_seq3	0.763691	ENSDARG00000008931	1.38446	0.469327	3.93726	7.3387	0.00674858	0.0122781	8	38143125	38156051	renbp	renin binding protein [Source:ZFIN;Acc:ZDB-GENE-041212-34]
comp32728_c0_seq1	0.460688	ENSDARG00000008936	2.42283	1.27669	6.57563	102.305	4.7598e-24	9.6975e-23	18	26732450	26742090	sec11a	SEC11 homolog A (S. cerevisiae) [Source:ZFIN;Acc:ZDB-GENE-040718-227]
comp41638_c0_seq1	0.866842	ENSDARG00000008936	2.42283	1.27669	6.57563	102.305	4.7598e-24	9.6975e-23	18	26732450	26742090	sec11a	SEC11 homolog A (S. cerevisiae) [Source:ZFIN;Acc:ZDB-GENE-040718-227]
comp28283_c0_seq1	0.523334	ENSDARG00000008937	2.22112	1.15129	4.83112	66.3492	3.777e-16	3.7441e-15	7	55234835	55569461	neo1	neogenin 1 [Source:ZFIN;Acc:ZDB-GENE-021031-1]
comp28283_c0_seq2	0.764281	ENSDARG00000008937	2.22112	1.15129	4.83112	66.3492	3.777e-16	3.7441e-15	7	55234835	55569461	neo1	neogenin 1 [Source:ZFIN;Acc:ZDB-GENE-021031-1]
comp38341_c0_seq1	0.429754	ENSDARG00000008953	1.81429	0.859408	4.86067	45.3697	1.6314e-11	1.0261e-10	23	7765607	7782699	pofut1	protein O-fucosyltransferase 1 [Source:ZFIN;Acc:ZDB-GENE-040303-2]
comp50222_c0_seq1	2.20173	ENSDARG00000008986	2.71055	1.43859	2.00462	45.5511	1.4871e-11	9.3742e-11	4	2401851	2416355	e2f7	E2F transcription factor 7 [Source:ZFIN;Acc:ZDB-GENE-030131-3527]
comp32968_c0_seq1	0.80389	ENSDARG00000009001	2.50867	1.32692	7.87367	55.0257	1.1896e-13	9.3015e-13	20	31243403	31257030	pdip5	protein disulfide isomerase-related protein (provisional) [Source:ZFIN;Acc:ZDB-GENE-030131-879]
comp69058_c0_seq1	3.1586	ENSDARG00000009001	2.50867	1.32692	7.87367	55.0257	1.1896e-13	9.3015e-13	20	31243403	31257030	pdip5	protein disulfide isomerase-related protein (provisional) [Source:ZFIN;Acc:ZDB-GENE-030131-879]
comp35149_c0_seq1	0.26436	ENSDARG00000009023	1.27991	0.356039	4.08232	5.73622	0.0166185	0.0279566	16	22143616	22239485	ankrd28b	ankyrin repeat domain 28b [Source:ZFIN;Acc:ZDB-GENE-070622-4]
comp56304_c0_seq1	2.52204	ENSDARG00000009023	1.27991	0.356039	4.08232	5.73622	0.0166185	0.0279566	16	22143616	22239485	ankrd28b	ankyrin repeat domain 28b [Source:ZFIN;Acc:ZDB-GENE-070622-4]
comp41247_c0_seq1	7.464	ENSDARG00000009194	5.25206	2.39288	7.79991	166.272	4.8254e-38	2.3572e-36	19	40022486	40173904	col16a1	collagen, type XVI, alpha 1 [Source:ZFIN;Acc:ZDB-GENE-060503-351]
comp41247_c0_seq1	7.464	ENSDARG00000009194	5.25206	2.39288	7.79991	166.272	4.8254e-38	2.3572e-36	19	40022486	40173904	col16a1	collagen, type XVI, alpha 1 [Source:ZFIN;Acc:ZDB-GENE-060503-351]
comp41247_c0_seq12	6.90844	ENSDARG00000009194	5.25206	2.39288	7.79991	166.272	4.8254e-38	2.3572e-36	19	40022486	40173904	col16a1	collagen, type XVI, alpha 1 [Source:ZFIN;Acc:ZDB-GENE-060503-351]
comp41247_c0_seq12	6.90844	ENSDARG00000009194	5.25206	2.39288	7.79991	166.272	4.8254e-38	2.3572e-36	19	40022486	40173904	col16a1	collagen, type XVI, alpha 1 [Source:ZFIN;Acc:ZDB-GENE-060503-351]
comp41247_c0_seq13	3.75915	ENSDARG00000009194	5.25206	2.39288	7.79991	166.272	4.8254e-38	2.3572e-36	19	40022486	40173904	col16a1	collagen, type XVI, alpha 1 [Source:ZFIN;Acc:ZDB-GENE-060503-351]
comp41247_c0_seq15	9.50842	ENSDARG00000009194	5.25206	2.39288	7.79991	166.272	4.8254e-38	2.3572e-36	19	40022486	40173904	col16a1	collagen, type XVI, alpha 1 [Source:ZFIN;Acc:ZDB-GENE-060503-351]
comp41247_c0_seq15	9.50842	ENSDARG00000009194	5.25206	2.39288	7.79991	166.272	4.8254e-38	2.3572e-36	19	40022486	40173904	col16a1	collagen, type XVI, alpha 1 [Source:ZFIN;Acc:ZDB-GENE-060503-351]
comp41247_c0_seq16	5.01568	ENSDARG00000009194	5.25206	2.39288	7.79991	166.272	4.8254e-38	2.3572e-36	19	40022486	40173904	col16a1	collagen, type XVI, alpha 1 [Source:ZFIN;Acc:ZDB-GENE-060503-351]
comp41247_c0_seq2	7.464	ENSDARG00000009194	5.25206	2.39288	7.79991	166.272	4.8254e-38	2.3572e-36	19	40022486	40173904	col16a1	collagen, type XVI, alpha 1 [Source:ZFIN;Acc:ZDB-GENE-060503-351]
comp41247_c0_seq21	3.75915	ENSDARG00000009194	5.25206	2.39288	7.79991	166.272	4.8254e-38	2.3572e-36	19	40022486	40173904	col16a1	collagen, type XVI, alpha 1 [Source:ZFIN;Acc:ZDB-GENE-060503-351]
comp41247_c0_seq25	6.66276	ENSDARG00000009194	5.25206	2.39288	7.79991	166.272	4.8254e-38	2.3572e-36	19	40022486	40173904	col16a1	collagen, type XVI, alpha 1 [Source:ZFIN;Acc:ZDB-GENE-060503-351]
comp41247_c0_seq25	6.66276	ENSDARG00000009194	5.25206	2.39288	7.79991	166.272	4.8254e-38	2.3572e-36	19	40022486	40173904	col16a1	collagen, type XVI, alpha 1 [Source:ZFIN;Acc:ZDB-GENE-060503-351]
comp41247_c0_seq27	9.1105	ENSDARG00000009194	5.25206	2.39288	7.79991	166.272	4.8254e-38	2.3572e-36	19	40022486	40173904	col16a1	collagen, type XVI, alpha 1 [Source:ZFIN;Acc:ZDB-GENE-060503-351]
comp41247_c0_seq28	1.4488	ENSDARG00000009194	5.25206	2.39288	7.79991	166.272	4.8254e-38	2.3572e-36	19	40022486	40173904	col16a1	collagen, type XVI, alpha 1 [Source:ZFIN;Acc:ZDB-GENE-060503-351]
comp41247_c0_seq28	1.4488	ENSDARG00000009194	5.25206	2.39288	7.79991	166.272	4.8254e-38	2.3572e-36	19	40022486	40173904	col16a1	collagen, type XVI, alpha 1 [Source:ZFIN;Acc:ZDB-GENE-060503-351]
comp41247_c0_seq29	5.01568	ENSDARG00000009194	5.25206	2.39288	7.79991	166.272	4.8254e-38	2.3572e-36	19	40022486	40173904	col16a1	collagen, type XVI, alpha 1 [Source:ZFIN;Acc:ZDB-GENE-060503-351]
comp41247_c0_seq30	6.12865	ENSDARG00000009194	5.25206	2.39288	7.79991	166.272	4.8254e-38	2.3572e-36	19	40022486	40173904	col16a1	collagen, type XVI, alpha 1 [Source:ZFIN;Acc:ZDB-GENE-060503-351]
comp41247_c0_seq30	6.12865	ENSDARG00000009194	5.25206	2.39288	7.79991	166.272	4.8254e-38	2.3572e-36	19	40022486	40173904	col16a1	collagen, type XVI, alpha 1 [Source:ZFIN;Acc:ZDB-GENE-060503-351]
comp41247_c0_seq35	7.464	ENSDARG00000009194	5.25206	2.39288	7.79991	166.272	4.8254e-38	2.3572e-36	19	40022486	40173904	col16a1	collagen, type XVI, alpha 1 [Source:ZFIN;Acc:ZDB-GENE-060503-351]
comp41247_c0_seq36	2.00233	ENSDARG00000009194	5.25206	2.39288	7.79991	166.272	4.8254e-38	2.3572e-36	19	40022486	40173904	col16a1	collagen, type XVI, alpha 1 [Source:ZFIN;Acc:ZDB-GENE-060503-351]
comp41247_c0_seq36	2.00233	ENSDARG00000009194	5.25206	2.39288	7.79991	166.272	4.8254e-38	2.3572e-36	19	40022486	40173904	col16a1	collagen, type XVI, alpha 1 [Source:ZFIN;Acc:ZDB-GENE-060503-351]
comp41247_c0_seq4	5.67693	ENSDARG00000009194	5.25206	2.39288	7.79991	166.272	4.8254e-38	2.3572e-36	19	40022486	40173904	col16a1	collagen, type XVI, alpha 1 [Source:ZFIN;Acc:ZDB-GENE-060503-351]
comp41247_c0_seq41	2.86195	ENSDARG00000009194	5.25206	2.39288	7.79991	166.272	4.8254e-38	2.3572e-36	19	40022486	40173904	col16a1	collagen, type XVI, alpha 1 [Source:ZFIN;Acc:ZDB-GENE-060503-351]
comp41247_c0_seq45	2.86195	ENSDARG00000009194	5.25206	2.39288	7.79991	166.272	4.8254e-38	2.3572e-36	19	40022486	40173904	col16a1	collagen, type XVI, alpha 1 [Source:ZFIN;Acc:ZDB-GENE-060503-351]
comp41247_c0_seq49	6.98184	ENSDARG00000009194	5.25206	2.39288	7.79991	166.272	4.8254e-38	2.3572e-36	19	40022486	40173904	col16a1	collagen, type XVI, alpha 1 [Source:ZFIN;Acc:ZDB-GENE-060503-351]
comp41247_c0_seq5	7.24297	ENSDARG00000009194	5.25206	2.39288	7.79991	166.272	4.8254e-38	2.3572e-36	19	40022486	40173904	col16a1	collagen, type XVI, alpha 1 [Source:ZFIN;Acc:ZDB-GENE-060503-351]
comp41247_c0_seq51	5.27127	ENSDARG00000009194	5.25206	2.39288	7.79991	166.272	4.8254e-38	2.3572e-36	19	40022486	40173904	col16a1	collagen, type XVI, alpha 1 [Source:ZFIN;Acc:ZDB-GENE-060503-351]
comp41247_c0_seq52	6.66276	ENSDARG00000009194	5.25206	2.39288	7.79991	166.272	4.8254e-38	2.3572e-36	19	40022486	40173904	col16a1	collagen, type XVI, alpha 1 [Source:ZFIN;Acc:ZDB-GENE-060503-351]
comp41247_c0_seq7	9.29461	ENSDARG00000009194	5.25206	2.39288	7.79991	166.272	4.8254e-38	2.3572e-36	19	40022486	40173904	col16a1	collagen, type XVI, alpha 1 [Source:ZFIN;Acc:ZDB-GENE-060503-351]
comp41247_c0_seq8	9.60451	ENSDARG00000009194	5.25206	2.39288	7.79991	166.272	4.8254e-38	2.3572e-36	19	40022486	40173904	col16a1	collagen, type XVI, alpha 1 [Source:ZFIN;Acc:ZDB-GENE-060503-351]
comp38349_c0_seq1	1.52206	ENSDARG00000009214	1.55498	0.636897	5.12809	29.5921	5.33223e-08	2.19598e-07	12	35390736	35411359	tmem180	transmembrane protein 180 [Source:ZFIN;Acc:ZDB-GENE-041212-83]
comp38349_c0_seq2	5.67693	ENSDARG00000009214	1.55498	0.636897	5.12809	29.5921	5.33223e-08	2.19598e-07	12	35390736	35411359	tmem180	transmembrane protein 180 [Source:ZFIN;Acc:ZDB-GENE-041212-83]
comp30287_c0_seq1	0.293727	ENSDARG00000009262	2.4459	1.29036	1.25667	20.804	5.08763e-06	1.5853e-05	4	1849440	1897600	FAR2	fatty acyl CoA reductase 2 [Source:HGNC Symbol;Acc:HGNC:25531]
comp15092_c0_seq1	0.899575	ENSDARG00000009499	1.38552	0.470427	4.3828	7.5059	0.00614971	0.0112769	20	26125137	26389041	syne1a	spectrin repeat containing, nuclear envelope 1a [Source:ZFIN;Acc:ZDB-GENE-030131-4172]
comp17442_c0_seq1	1.34469	ENSDARG00000009499	1.38552	0.470427	4.3828	7.5059	0.00614971	0.0112769	20	26125137	26389041	syne1a	spectrin repeat containing, nuclear envelope 1a [Source:ZFIN;Acc:ZDB-GENE-030131-4172]
comp33452_c0_seq1	1.13575	ENSDARG00000009499	1.38552	0.470427	4.3828	7.5059	0.00614971	0.0112769	20	26125137	26389041	syne1a	spectrin repeat containing, nuclear envelope 1a [Source:ZFIN;Acc:ZDB-GENE-030131-4172]
comp33452_c0_seq1	1.13575	ENSDARG00000009499	1.38552	0.470427	4.3828	7.5059	0.00614971	0.0112769	20	26125137	26389041	syne1a	spectrin repeat containing, nuclear envelope 1a [Source:ZFIN;Acc:ZDB-GENE-030131-4172]
comp33452_c0_seq2	10.916	ENSDARG00000009499	1.38552	0.470427	4.3828	7.5059	0.00614971	0.0112769	20	26125137	26389041	syne1a	spectrin repeat containing, nuclear envelope 1a [Source:ZFIN;Acc:ZDB-GENE-030131-4172]
comp33452_c0_seq2	10.916	ENSDARG00000009499	1.38552	0.470427	4.3828	7.5059	0.00614971	0.0112769	20	26125137	26389041	syne1a	spectrin repeat containing, nuclear envelope 1a [Source:ZFIN;Acc:ZDB-GENE-030131-4172]
comp33452_c0_seq6	1.55023	ENSDARG00000009499	1.38552	0.470427	4.3828	7.5059	0.00614971	0.0112769	20	26125137	26389041	syne1a	spectrin repeat containing, nuclear envelope 1a [Source:ZFIN;Acc:ZDB-GENE-030131-4172]
comp33452_c0_seq6	1.55023	ENSDARG00000009499	1.38552	0.470427	4.3828	7.5059	0.00614971	0.0112769	20	26125137	26389041	syne1a	spectrin repeat containing, nuclear envelope 1a [Source:ZFIN;Acc:ZDB-GENE-030131-4172]
comp35694_c0_seq1	1.36456	ENSDARG00000009534	1.46861	0.554451	7.53669	18.1215	2.07247e-05	5.89339e-05	2	10133482	10178043	wls	wntless homolog (Drosophila) [Source:ZFIN;Acc:ZDB-GENE-040426-2161]
comp32867_c0_seq1	1.06132	ENSDARG00000009607	1.20993	0.274922	5.34303	6.84238	0.00890201	0.0158423	4	5637735	5648756	ccnc	cyclin C [Source:ZFIN;Acc:ZDB-GENE-030131-7369]
comp39577_c0_seq1	0.0612193	ENSDARG00000009629	1.48678	0.572187	4.22042	20.038	7.59197e-06	2.29971e-05	8	41801150	41812334	unc119.1	unc-119 homolog 1 [Source:ZFIN;Acc:ZDB-GENE-030219-130]
comp39577_c0_seq1	0.0612193	ENSDARG00000009629	1.48678	0.572187	4.22042	20.038	7.59197e-06	2.29971e-05	8	41801150	41812334	unc119.1	unc-119 homolog 1 [Source:ZFIN;Acc:ZDB-GENE-030219-130]
comp70996_c0_seq1	1.56913	ENSDARG00000009724	2.58541	1.37039	7.71711	129.676	4.8253e-30	1.4872e-28	11	15587384	15659356	rpn2	ribophorin II [Source:ZFIN;Acc:ZDB-GENE-030131-7928]
comp38052_c0_seq1	5.71124	ENSDARG00000009830	1.21706	0.283397	9.68297	5.24948	0.0219534	0.0360279	6	26583067	26603979	hdlbpa	high density lipoprotein-binding protein a [Source:ZFIN;Acc:ZDB-GENE-030131-2032]
comp74917_c0_seq1	1.48788	ENSDARG00000009830	1.21706	0.283397	9.68297	5.24948	0.0219534	0.0360279	6	26583067	26603979	hdlbpa	high density lipoprotein-binding protein a [Source:ZFIN;Acc:ZDB-GENE-030131-2032]
comp75677_c0_seq1	0.457709	ENSDARG00000009830	1.21706	0.283397	9.68297	5.24948	0.0219534	0.0360279	6	26583067	26603979	hdlbpa	high density lipoprotein-binding protein a [Source:ZFIN;Acc:ZDB-GENE-030131-2032]
comp34872_c0_seq1	0.754726	ENSDARG00000009864	1.22927	0.297806	4.15285	5.46503	0.0194008	0.0322067	10	3405373	3423760	ddx55	DEAD (Asp-Glu-Ala-Asp) box polypeptide 55 [Source:ZFIN;Acc:ZDB-GENE-021212-1]
comp35340_c0_seq1	1.18839	ENSDARG00000009933	1.58773	0.666962	7.1014	29.3482	6.04736e-08	2.47427e-07	22	1189220	1220491	lmnb2	lamin B2 [Source:ZFIN;Acc:ZDB-GENE-990630-13]
comp35340_c0_seq2	0.778395	ENSDARG00000009933	1.58773	0.666962	7.1014	29.3482	6.04736e-08	2.47427e-07	22	1189220	1220491	lmnb2	lamin B2 [Source:ZFIN;Acc:ZDB-GENE-990630-13]
comp74713_c0_seq1	0.552885	ENSDARG00000009933	1.58773	0.666962	7.1014	29.3482	6.04736e-08	2.47427e-07	22	1189220	1220491	lmnb2	lamin B2 [Source:ZFIN;Acc:ZDB-GENE-990630-13]
comp27001_c0_seq1	0.878129	ENSDARG00000009942	1.46728	0.553143	3.59912	12.4994	0.00040709	0.00092961	11	11904847	11914072	cdc6	cell division cycle 6 homolog (S. cerevisiae) [Source:ZFIN;Acc:ZDB-GENE-050506-131]
comp35412_c0_seq1	1.94877	ENSDARG00000009953	1.42486	0.510822	4.25182	11.2434	0.00079905	0.00172344	9	35369146	35395313	med14	mediator complex subunit 14 [Source:ZFIN;Acc:ZDB-GENE-030131-8867]
comp39983_c0_seq7	0.905472	ENSDARG00000009958	1.26292	0.336758	4.03106	6.10082	0.0135119	0.0231822	15	22561590	22621848	cbl	Cas-Br-M (murine) ecotropic retroviral transforming sequence [Source:ZFIN;Acc:ZDB-GENE-041114-207]
comp15366_c0_seq1	0.640065	ENSDARG00000010021	1.2902	0.367599	5.53158	6.46909	0.0109766	0.0191978	7	41136970	41144266	grpel1	GrpE-like 1, mitochondrial [Source:ZFIN;Acc:ZDB-GENE-051120-111]
comp28956_c0_seq2	2.35564	ENSDARG00000010070	2.11008	1.0773	4.80229	75.6167	3.4444e-18	4.1146e-17	8	48004002	48093554	adam9	a disintegrin and metalloproteinase domain 9 [Source:ZFIN;Acc:ZDB-GENE-040912-127]
comp29863_c0_seq1	0.382395	ENSDARG00000010078	1.37218	0.456468	4.58626	11.8438	0.00057855	0.00128112	1	54485864	54508660	nup133	nucleoporin 133 [Source:ZFIN;Acc:ZDB-GENE-040426-2941]
comp62946_c0_seq1	0.486037	ENSDARG00000010132	8.5479	3.09557	1.75086	94.8089	2.0968e-22	3.6529e-21	21	33330273	33624083	dacha	dachshund a [Source:ZFIN;Acc:ZDB-GENE-020402-3]
comp48480_c0_seq1	0.350827	ENSDARG00000010149	1.70123	0.76658	8.68383	30.2296	3.83806e-08	1.60957e-07	21	5320080	5331830	atp5a1	ATP synthase, H+ transporting, mitochondrial F1 complex, alpha subunit 1, cardiac muscle [Source:ZFIN;Acc:ZDB-GENE-060201-1]
comp58860_c0_seq1	0.890305	ENSDARG00000010149	1.70123	0.76658	8.68383	30.2296	3.83806e-08	1.60957e-07	21	5320080	5331830	atp5a1	ATP synthase, H+ transporting, mitochondrial F1 complex, alpha subunit 1, cardiac muscle [Source:ZFIN;Acc:ZDB-GENE-060201-1]
comp30375_c0_seq3	0.45414	ENSDARG00000010155	1.23602	0.3057	6.20006	5.40184	0.0201155	0.0332987	24	6018848	6096176	abi1a	abl-interactor 1a [Source:ZFIN;Acc:ZDB-GENE-040426-1701]
comp30375_c0_seq4	0.688413	ENSDARG00000010155	1.23602	0.3057	6.20006	5.40184	0.0201155	0.0332987	24	6018848	6096176	abi1a	abl-interactor 1a [Source:ZFIN;Acc:ZDB-GENE-040426-1701]
comp30375_c0_seq5	9.41875	ENSDARG00000010155	1.23602	0.3057	6.20006	5.40184	0.0201155	0.0332987	24	6018848	6096176	abi1a	abl-interactor 1a [Source:ZFIN;Acc:ZDB-GENE-040426-1701]
comp34797_c0_seq2	0.650941	ENSDARG00000010181	5.45009	2.44628	2.62708	120.712	4.4193e-28	1.1929e-26	17	35264154	35390612	asap2a	ArfGAP with SH3 domain, ankyrin repeat and PH domain 2a [Source:ZFIN;Acc:ZDB-GENE-041210-256]
comp60928_c0_seq1	0.088582	ENSDARG00000010246	1.82342	0.866647	7.61051	31.4118	2.08709e-08	9.05974e-08	3	32493809	32499997	prmt1	protein arginine methyltransferase 1 [Source:ZFIN;Acc:ZDB-GENE-030131-693]
comp35638_c0_seq1	0.504247	ENSDARG00000010266	1.96202	0.972338	2.38339	17.5184	2.84545e-05	7.889e-05	19	20683551	20727793	igf2bp3	insulin-like growth factor 2 mRNA binding protein 3 [Source:ZFIN;Acc:ZDB-GENE-000308-1]
comp40891_c0_seq1	1.86783	ENSDARG00000010276	2.86557	1.51882	4.52244	17.0747	3.59388e-05	9.79735e-05	20	34146426	34152023	ptgs2b	prostaglandin-endoperoxide synthase 2b [Source:ZFIN;Acc:ZDB-GENE-041014-323]
comp40891_c0_seq2	7.30149	ENSDARG00000010276	2.86557	1.51882	4.52244	17.0747	3.59388e-05	9.79735e-05	20	34146426	34152023	ptgs2b	prostaglandin-endoperoxide synthase 2b [Source:ZFIN;Acc:ZDB-GENE-041014-323]
comp40891_c0_seq3	1.06807	ENSDARG00000010276	2.86557	1.51882	4.52244	17.0747	3.59388e-05	9.79735e-05	20	34146426	34152023	ptgs2b	prostaglandin-endoperoxide synthase 2b [Source:ZFIN;Acc:ZDB-GENE-041014-323]
comp40891_c0_seq4	2.77569	ENSDARG00000010276	2.86557	1.51882	4.52244	17.0747	3.59388e-05	9.79735e-05	20	34146426	34152023	ptgs2b	prostaglandin-endoperoxide synthase 2b [Source:ZFIN;Acc:ZDB-GENE-041014-323]
comp40891_c0_seq5	5.84372	ENSDARG00000010276	2.86557	1.51882	4.52244	17.0747	3.59388e-05	9.79735e-05	20	34146426	34152023	ptgs2b	prostaglandin-endoperoxide synthase 2b [Source:ZFIN;Acc:ZDB-GENE-041014-323]
comp18949_c0_seq1	0.762276	ENSDARG00000010280	1.2475	0.319038	5.40385	7.24774	0.00709905	0.0128488	9	39216185	39344120	clasp1a	cytoplasmic linker associated protein 1a [Source:ZFIN;Acc:ZDB-GENE-081104-520]
comp26264_c0_seq2	0.400224	ENSDARG00000010280	1.2475	0.319038	5.40385	7.24774	0.00709905	0.0128488	9	39216185	39344120	clasp1a	cytoplasmic linker associated protein 1a [Source:ZFIN;Acc:ZDB-GENE-081104-520]
comp26264_c0_seq3	6.66276	ENSDARG00000010280	1.2475	0.319038	5.40385	7.24774	0.00709905	0.0128488	9	39216185	39344120	clasp1a	cytoplasmic linker associated protein 1a [Source:ZFIN;Acc:ZDB-GENE-081104-520]
comp26264_c0_seq4	8.71797	ENSDARG00000010280	1.2475	0.319038	5.40385	7.24774	0.00709905	0.0128488	9	39216185	39344120	clasp1a	cytoplasmic linker associated protein 1a [Source:ZFIN;Acc:ZDB-GENE-081104-520]
comp38519_c0_seq2	12.1899	ENSDARG00000010445	2.21329	1.14619	4.58174	72.6359	1.5591e-17	1.7537e-16	18	14471615	14487550	trabd	TraB domain containing [Source:ZFIN;Acc:ZDB-GENE-030131-1301]
comp27497_c0_seq2	1.63474	ENSDARG00000010462	37.6839	5.23588	5.6807	371.167	1.0424e-82	2.7185e-80	9	2590375	2592972	sp9	sp9 transcription factor [Source:ZFIN;Acc:ZDB-GENE-040426-2313]
comp37571_c0_seq1	7.30149	ENSDARG00000010462	37.6839	5.23588	5.6807	371.167	1.0424e-82	2.7185e-80	9	2590375	2592972	sp9	sp9 transcription factor [Source:ZFIN;Acc:ZDB-GENE-040426-2313]
comp45415_c0_seq1	5.84372	ENSDARG00000010462	37.6839	5.23588	5.6807	371.167	1.0424e-82	2.7185e-80	9	2590375	2592972	sp9	sp9 transcription factor [Source:ZFIN;Acc:ZDB-GENE-040426-2313]
comp49311_c0_seq1	0.868414	ENSDARG00000010462	37.6839	5.23588	5.6807	371.167	1.0424e-82	2.7185e-80	9	2590375	2592972	sp9	sp9 transcription factor [Source:ZFIN;Acc:ZDB-GENE-040426-2313]
comp59242_c0_seq1	0.394676	ENSDARG00000010524	1.99339	0.995223	3.22892	13.246	0.00027317	0.00064249	21	11964506	11986956	si:ch211-282j22.3	si:ch211-282j22.3 [Source:ZFIN;Acc:ZDB-GENE-091113-49]
comp42039_c0_seq1	1.45619	ENSDARG00000010571	2.41746	1.27349	4.81983	99.3769	2.0874e-23	4.0255e-22	24	17894626	17913561	ezh2	enhancer of zeste homolog 2 (Drosophila) [Source:ZFIN;Acc:ZDB-GENE-041111-259]
comp39210_c0_seq3	0.979871	ENSDARG00000010583	1.70344	0.768455	4.08012	28.5457	9.15117e-08	3.65421e-07	2	43306095	43490366	pard3	par-3 partitioning defective 3 homolog (C. elegans) [Source:ZFIN;Acc:ZDB-GENE-030925-47]
comp39210_c0_seq4	1.01847	ENSDARG00000010583	1.70344	0.768455	4.08012	28.5457	9.15117e-08	3.65421e-07	2	43306095	43490366	pard3	par-3 partitioning defective 3 homolog (C. elegans) [Source:ZFIN;Acc:ZDB-GENE-030925-47]
comp40577_c0_seq2	0.0293928	ENSDARG00000010721	1.19209	0.253487	6.83882	6.48375	0.0108865	0.01905	14	34272767	34303017	2015-09-06	septin 6 [Source:ZFIN;Acc:ZDB-GENE-030131-1414]
comp36564_c0_seq1	0.195279	ENSDARG00000010785	3.48249	1.80012	6.80981	79.9757	3.7905e-19	4.9502e-18	20	29063532	29077604	thbs1b	thrombospondin 1b [Source:ZFIN;Acc:ZDB-GENE-020708-1]
comp36564_c0_seq1	0.195279	ENSDARG00000010785	3.48249	1.80012	6.80981	79.9757	3.7905e-19	4.9502e-18	20	29063532	29077604	thbs1b	thrombospondin 1b [Source:ZFIN;Acc:ZDB-GENE-020708-1]
comp27174_c0_seq2	0.182285	ENSDARG00000010792	1.5956	0.674098	4.48823	20.1957	6.99117e-06	2.12951e-05	13	14776347	14790249	cdc25	cell division cycle 25 homolog [Source:ZFIN;Acc:ZDB-GENE-000330-5]
comp27174_c0_seq3	9.80993	ENSDARG00000010792	1.5956	0.674098	4.48823	20.1957	6.99117e-06	2.12951e-05	13	14776347	14790249	cdc25	cell division cycle 25 homolog [Source:ZFIN;Acc:ZDB-GENE-000330-5]
comp34320_c0_seq1	1.99461	ENSDARG00000010792	1.5956	0.674098	4.48823	20.1957	6.99117e-06	2.12951e-05	13	14776347	14790249	cdc25	cell division cycle 25 homolog [Source:ZFIN;Acc:ZDB-GENE-000330-5]
comp34320_c0_seq1	1.99461	ENSDARG00000010792	1.5956	0.674098	4.48823	20.1957	6.99117e-06	2.12951e-05	13	14776347	14790249	cdc25	cell division cycle 25 homolog [Source:ZFIN;Acc:ZDB-GENE-000330-5]
comp38545_c0_seq2	0.0521292	ENSDARG00000010792	1.5956	0.674098	4.48823	20.1957	6.99117e-06	2.12951e-05	13	14776347	14790249	cdc25	cell division cycle 25 homolog [Source:ZFIN;Acc:ZDB-GENE-000330-5]
comp33015_c0_seq1	0.347991	ENSDARG00000010878	8.13329	3.02384	1.65623	102.769	3.7663e-24	7.7762e-23	7	50120652	50124044	cdkn1c	cyclin-dependent kinase inhibitor 1C [Source:ZFIN;Acc:ZDB-GENE-040123-1]
comp39512_c0_seq1	0.936951	ENSDARG00000010905	1.39054	0.475645	3.01304	9.56963	0.00197823	0.00397356	20	14841655	14855943	mettl13	methyltransferase like 13 [Source:ZFIN;Acc:ZDB-GENE-060929-60]
comp36159_c0_seq1	2.57299	ENSDARG00000010948	4.5405	2.18285	5.4586	161.042	6.6992e-37	3.0691e-35	17	19311202	19327159	kif11	kinesin family member 11 [Source:ZFIN;Acc:ZDB-GENE-020426-1]
comp20537_c0_seq2	2.74013	ENSDARG00000011000	1.23855	0.308647	5.78866	9.23704	0.00237168	0.00469817	20	16478205	16494067	gtf2a1	general transcription factor IIA, 1 [Source:ZFIN;Acc:ZDB-GENE-030131-2694]
comp20537_c0_seq3	6.47215	ENSDARG00000011000	1.23855	0.308647	5.78866	9.23704	0.00237168	0.00469817	20	16478205	16494067	gtf2a1	general transcription factor IIA, 1 [Source:ZFIN;Acc:ZDB-GENE-030131-2694]
comp32564_c0_seq1	0.525984	ENSDARG00000011000	1.23855	0.308647	5.78866	9.23704	0.00237168	0.00469817	20	16478205	16494067	gtf2a1	general transcription factor IIA, 1 [Source:ZFIN;Acc:ZDB-GENE-030131-2694]
comp43028_c0_seq1	0.0303878	ENSDARG00000011000	1.23855	0.308647	5.78866	9.23704	0.00237168	0.00469817	20	16478205	16494067	gtf2a1	general transcription factor IIA, 1 [Source:ZFIN;Acc:ZDB-GENE-030131-2694]
comp15640_c0_seq1	9.22073	ENSDARG00000011127	1.52717	0.61086	5.42675	20.412	6.24369e-06	1.91664e-05	17	43896310	43910257	ahsa1l	AHA1, activator of heat shock protein ATPase homolog 1, like [Source:ZFIN;Acc:ZDB-GENE-030131-664]
comp15640_c0_seq2	0.446342	ENSDARG00000011127	1.52717	0.61086	5.42675	20.412	6.24369e-06	1.91664e-05	17	43896310	43910257	ahsa1l	AHA1, activator of heat shock protein ATPase homolog 1, like [Source:ZFIN;Acc:ZDB-GENE-030131-664]
comp32366_c0_seq1	0.61897	ENSDARG00000011175	1.21636	0.282569	6.62049	5.69656	0.0169982	0.0285227	20	51423317	51435380	atp6v1d	ATPase, H+ transporting, V1 subunit D [Source:ZFIN;Acc:ZDB-GENE-040426-727]
comp15526_c0_seq1	0.700678	ENSDARG00000011196	1.19982	0.262813	5.48282	5.39989	0.020138	0.0333236	23	30946416	30963488	dnajc11	DnaJ (Hsp40) homolog, subfamily C, member 11 [Source:ZFIN;Acc:ZDB-GENE-030131-1673]
comp24305_c0_seq1	0.587841	ENSDARG00000011219	1.55938	0.640975	5.83002	26.4602	2.69018e-07	1.01224e-06	18	39007941	39050674	akt2	v-akt murine thymoma viral oncogene homolog 2 [Source:ZFIN;Acc:ZDB-GENE-031007-5]
comp25448_c0_seq1	0.537162	ENSDARG00000011219	1.55938	0.640975	5.83002	26.4602	2.69018e-07	1.01224e-06	18	39007941	39050674	akt2	v-akt murine thymoma viral oncogene homolog 2 [Source:ZFIN;Acc:ZDB-GENE-031007-5]
comp25448_c0_seq1	0.537162	ENSDARG00000011219	1.55938	0.640975	5.83002	26.4602	2.69018e-07	1.01224e-06	18	39007941	39050674	akt2	v-akt murine thymoma viral oncogene homolog 2 [Source:ZFIN;Acc:ZDB-GENE-031007-5]
comp42093_c0_seq1	0.772577	ENSDARG00000011219	1.55938	0.640975	5.83002	26.4602	2.69018e-07	1.01224e-06	18	39007941	39050674	akt2	v-akt murine thymoma viral oncogene homolog 2 [Source:ZFIN;Acc:ZDB-GENE-031007-5]
comp37589_c0_seq2	6.74939	ENSDARG00000011240	1.45637	0.542372	3.98747	17.4993	2.87411e-05	7.95672e-05	10	30627156	30636177	ift46	intraflagellar transport protein 46 [Source:ZFIN;Acc:ZDB-GENE-080102-3]
comp41664_c0_seq1	0.182018	ENSDARG00000011240	1.45637	0.542372	3.98747	17.4993	2.87411e-05	7.95672e-05	10	30627156	30636177	ift46	intraflagellar transport protein 46 [Source:ZFIN;Acc:ZDB-GENE-080102-3]
comp48082_c0_seq1	5.84372	ENSDARG00000011262	3.12868	1.64556	2.54712	93.5028	4.0563e-22	6.8965e-21	11	36003615	36011950	traip	TRAF-interacting protein [Source:ZFIN;Acc:ZDB-GENE-040801-30]
comp58624_c0_seq1	3.76692	ENSDARG00000011262	3.12868	1.64556	2.54712	93.5028	4.0563e-22	6.8965e-21	11	36003615	36011950	traip	TRAF-interacting protein [Source:ZFIN;Acc:ZDB-GENE-040801-30]
comp36759_c0_seq1	0.767103	ENSDARG00000011301	1.46128	0.547235	5.64218	22.8936	1.71221e-06	5.73362e-06	7	45761859	45782260	nae1	nedd8 activating enzyme E1 subunit 1 [Source:ZFIN;Acc:ZDB-GENE-040426-1552]
comp38567_c0_seq1	0.90866	ENSDARG00000011312	1.29801	0.376298	6.23675	11.6896	0.00062852	0.00138167	19	34182700	34195571	stk3	serine/threonine kinase 3 (STE20 homolog, yeast) [Source:ZFIN;Acc:ZDB-GENE-030131-2845]
comp7720_c0_seq1	1.03389	ENSDARG00000011312	1.29801	0.376298	6.23675	11.6896	0.00062852	0.00138167	19	34182700	34195571	stk3	serine/threonine kinase 3 (STE20 homolog, yeast) [Source:ZFIN;Acc:ZDB-GENE-030131-2845]
comp41699_c0_seq1	2.08951	ENSDARG00000011404	2.31182	1.20903	5.57852	72.6743	1.5291e-17	1.7223e-16	24	11681062	11691834	fen1	flap structure-specific endonuclease 1 [Source:ZFIN;Acc:ZDB-GENE-031112-11]
comp39547_c0_seq1	0.856864	ENSDARG00000011407	4.99722	2.32112	6.58361	107.713	3.1059e-25	7.0105e-24	11	100635	120089	col2a1b	collagen type II, alpha-1b [Source:ZFIN;Acc:ZDB-GENE-050302-9]
comp33203_c0_seq1	2.71693	ENSDARG00000011490	4.45992	2.15702	1.88696	48.8536	2.7579e-12	1.8692e-11	23	41588448	41702158	scube3	signal peptide, CUB domain, EGF-like 3 [Source:ZFIN;Acc:ZDB-GENE-060717-1]
comp41726_c0_seq1	1.67781	ENSDARG00000011510	1.73022	0.790953	7.49297	48.8134	2.8152e-12	1.9027e-11	23	21815648	21829182	rcc2	regulator of chromosome condensation 2 [Source:ZFIN;Acc:ZDB-GENE-040426-2213]
comp41726_c0_seq1	1.67781	ENSDARG00000011510	1.73022	0.790953	7.49297	48.8134	2.8152e-12	1.9027e-11	23	21815648	21829182	rcc2	regulator of chromosome condensation 2 [Source:ZFIN;Acc:ZDB-GENE-040426-2213]
comp35849_c0_seq1	6.25247	ENSDARG00000011533	2.07568	1.05358	4.43868	26.8186	2.23473e-07	8.48777e-07	18	38652499	38684953	sema6dl	sema domain, transmembrane domain (TM), and cytoplasmic domain, (semaphorin) 6D, like [Source:ZFIN;Acc:ZDB-GENE-050417-171]
comp40692_c0_seq1	0.4128	ENSDARG00000011611	1.79692	0.845527	6.62565	47.3613	5.9036e-12	3.8579e-11	10	43887068	43905964	actr1	ARP1 actin-related protein 1, centractin (yeast) [Source:ZFIN;Acc:ZDB-GENE-040426-2695]
comp41854_c0_seq1	0.846791	ENSDARG00000011611	1.79692	0.845527	6.62565	47.3613	5.9036e-12	3.8579e-11	10	43887068	43905964	actr1	ARP1 actin-related protein 1, centractin (yeast) [Source:ZFIN;Acc:ZDB-GENE-040426-2695]
comp10125_c0_seq1	0.0922722	ENSDARG00000011648	1.67997	0.748439	6.1882	27.1859	1.848e-07	7.1e-07	19	1996199	2001151	snrpd1	small nuclear ribonucleoprotein D1 polypeptide [Source:ZFIN;Acc:ZDB-GENE-020419-14]
comp68908_c0_seq1	1.54412	ENSDARG00000011648	1.67997	0.748439	6.1882	27.1859	1.848e-07	7.1e-07	19	1996199	2001151	snrpd1	small nuclear ribonucleoprotein D1 polypeptide [Source:ZFIN;Acc:ZDB-GENE-020419-14]
comp34384_c0_seq1	0.386313	ENSDARG00000011661	1.41615	0.501974	4.85097	18.1033	2.09239e-05	5.944e-05	4	13257859	13272250	twf1b	twinfilin, actin-binding protein, homolog 1b [Source:ZFIN;Acc:ZDB-GENE-040711-3]
comp40793_c0_seq4	0.980101	ENSDARG00000011673	10.5185	3.39486	4.63161	162.795	2.7733e-37	1.3022e-35	22	14289625	14416618	si:ch211-246m6.5	si:ch211-246m6.5 [Source:ZFIN;Acc:ZDB-GENE-050208-577]
comp27949_c0_seq1	0.115861	ENSDARG00000011769	3.24196	1.69687	3.78381	95.6143	1.396e-22	2.4752e-21	4	22676345	22694903	cpm	carboxypeptidase M [Source:ZFIN;Acc:ZDB-GENE-041210-191]
comp27949_c0_seq1	0.115861	ENSDARG00000011769	3.24196	1.69687	3.78381	95.6143	1.396e-22	2.4752e-21	4	22676345	22694903	cpm	carboxypeptidase M [Source:ZFIN;Acc:ZDB-GENE-041210-191]
comp41023_c0_seq1	2.29365	ENSDARG00000011821	25.4177	4.66776	5.45453	555.566	7.746e-123	7.724e-120	24	5317429	5394427	plod2	procollagen-lysine, 2-oxoglutarate 5-dioxygenase 2 [Source:ZFIN;Acc:ZDB-GENE-070326-1]
comp41023_c0_seq2	0.801005	ENSDARG00000011821	25.4177	4.66776	5.45453	555.566	7.746e-123	7.724e-120	24	5317429	5394427	plod2	procollagen-lysine, 2-oxoglutarate 5-dioxygenase 2 [Source:ZFIN;Acc:ZDB-GENE-070326-1]
comp22268_c0_seq2	1.7922	ENSDARG00000011825	3.13848	1.65007	3.65067	110.207	8.8284e-26	2.0585e-24	10	45207935	45261672	cetn3	centrin 3 [Source:ZFIN;Acc:ZDB-GENE-050522-152]
comp26942_c0_seq1	0.461975	ENSDARG00000011863	3.65977	1.87175	5.02794	121.848	2.4918e-28	6.868e-27	22	41304083	41369035	ptk7a	protein tyrosine kinase 7a [Source:ZFIN;Acc:ZDB-GENE-050522-216]
comp12623_c0_seq1	0.278923	ENSDARG00000012002	1.83426	0.875195	4.56917	48.5201	3.2693e-12	2.1991e-11	7	53250921	53269951	slc38a7	solute carrier family 38, member 7 [Source:ZFIN;Acc:ZDB-GENE-040801-266]
comp13455_c0_seq1	1.44366	ENSDARG00000012002	1.83426	0.875195	4.56917	48.5201	3.2693e-12	2.1991e-11	7	53250921	53269951	slc38a7	solute carrier family 38, member 7 [Source:ZFIN;Acc:ZDB-GENE-040801-266]
comp73170_c0_seq1	1.42489	ENSDARG00000012002	1.83426	0.875195	4.56917	48.5201	3.2693e-12	2.1991e-11	7	53250921	53269951	slc38a7	solute carrier family 38, member 7 [Source:ZFIN;Acc:ZDB-GENE-040801-266]
comp38329_c0_seq1	2.03396	ENSDARG00000012073	2.08614	1.06083	4.66528	56.2652	6.3325e-14	5.0801e-13	25	36128940	36155903	kif15	kinesin family member 15 [Source:ZFIN;Acc:ZDB-GENE-050622-16]
comp29952_c0_seq1	0.333794	ENSDARG00000012094	1.46428	0.55019	2.18616	5.62543	0.0177017	0.0296182	12	3448945	3487535	prkar1ab	protein kinase, cAMP-dependent, regulatory, type I, alpha (tissue specific extinguisher 1) b [Source:ZFIN;Acc:ZDB-GENE-050417-238]
comp17043_c0_seq1	1.55019	ENSDARG00000012196	2.12079	1.0846	1.12315	18.3319	1.85573e-05	5.3127e-05	5	58685892	58753361	fer	fer (fps/fes related) tyrosine kinase [Source:ZFIN;Acc:ZDB-GENE-060526-234]
comp53379_c0_seq1	0.717353	ENSDARG00000012196	2.12079	1.0846	1.12315	18.3319	1.85573e-05	5.3127e-05	5	58685892	58753361	fer	fer (fps/fes related) tyrosine kinase [Source:ZFIN;Acc:ZDB-GENE-060526-234]
comp5921_c0_seq1	1.9562	ENSDARG00000012196	2.12079	1.0846	1.12315	18.3319	1.85573e-05	5.3127e-05	5	58685892	58753361	fer	fer (fps/fes related) tyrosine kinase [Source:ZFIN;Acc:ZDB-GENE-060526-234]
comp37583_c0_seq1	1.74937	ENSDARG00000012199	1.86333	0.897885	4.75109	45.1834	1.7942e-11	1.1223e-10	7	44617056	44629653	gpt2	glutamic pyruvate transaminase (alanine aminotransferase) 2 [Source:ZFIN;Acc:ZDB-GENE-030729-8]
comp41813_c0_seq1	0.588149	ENSDARG00000012222	1.37616	0.460643	4.56597	11.1484	0.00084104	0.00180701	9	12535701	12546212	nup35	nucleoporin 35 [Source:ZFIN;Acc:ZDB-GENE-030131-9407]
comp35698_c0_seq1	0.0468467	ENSDARG00000012234	1.88772	0.916647	5.9207	34.0971	5.24288e-09	2.45638e-08	12	28777767	28783911	psme3	proteasome activator subunit 3 [Source:ZFIN;Acc:ZDB-GENE-991110-19]
comp78708_c0_seq1	0.750086	ENSDARG00000012234	1.88772	0.916647	5.9207	34.0971	5.24288e-09	2.45638e-08	12	28777767	28783911	psme3	proteasome activator subunit 3 [Source:ZFIN;Acc:ZDB-GENE-991110-19]
comp32281_c0_seq1	0.30691	ENSDARG00000012294	1.20567	0.26983	5.96714	5.89639	0.015172	0.0257	7	70398993	70431111	ap1g1	adaptor-related protein complex 1, gamma 1 subunit [Source:ZFIN;Acc:ZDB-GENE-030131-3187]
comp37818_c0_seq2	9.17452	ENSDARG00000012295	1.73912	0.798361	2.96446	21.1128	4.33029e-06	1.36869e-05	9	39452221	39459485	bcs1l	BCS1-like (yeast) [Source:ZFIN;Acc:ZDB-GENE-040426-938]
comp64279_c0_seq1	0.175216	ENSDARG00000012368	2.1824	1.12591	2.75383	52.8992	3.5111e-13	2.6242e-12	9	51018004	51070132	ttc21b	tetratricopeptide repeat domain 21B [Source:ZFIN;Acc:ZDB-GENE-031010-34]
comp76330_c0_seq1	0.17763	ENSDARG00000012368	2.1824	1.12591	2.75383	52.8992	3.5111e-13	2.6242e-12	9	51018004	51070132	ttc21b	tetratricopeptide repeat domain 21B [Source:ZFIN;Acc:ZDB-GENE-031010-34]
comp31370_c0_seq3	2.08173	ENSDARG00000012378	1.26235	0.336107	4.84576	11.5304	0.00068469	0.00149569	8	52198964	52231563	naa35	N(alpha)-acetyltransferase 35, NatC auxiliary subunit [Source:ZFIN;Acc:ZDB-GENE-030131-306]
comp27601_c0_seq1	8.35331	ENSDARG00000012395	31.581	4.98098	4.84673	189.245	4.6468e-43	3.0064e-41	10	39959934	39979810	mmp13a	matrix metalloproteinase 13a [Source:ZFIN;Acc:ZDB-GENE-031202-2]
comp32575_c0_seq1	4.22989	ENSDARG00000012395	31.581	4.98098	4.84673	189.245	4.6468e-43	3.0064e-41	10	39959934	39979810	mmp13a	matrix metalloproteinase 13a [Source:ZFIN;Acc:ZDB-GENE-031202-2]
comp32759_c0_seq1	4.1561	ENSDARG00000012395	31.581	4.98098	4.84673	189.245	4.6468e-43	3.0064e-41	10	39959934	39979810	mmp13a	matrix metalloproteinase 13a [Source:ZFIN;Acc:ZDB-GENE-031202-2]
comp34767_c0_seq1	10.322	ENSDARG00000012395	31.581	4.98098	4.84673	189.245	4.6468e-43	3.0064e-41	10	39959934	39979810	mmp13a	matrix metalloproteinase 13a [Source:ZFIN;Acc:ZDB-GENE-031202-2]
comp38652_c1_seq1	4.59512	ENSDARG00000012395	31.581	4.98098	4.84673	189.245	4.6468e-43	3.0064e-41	10	39959934	39979810	mmp13a	matrix metalloproteinase 13a [Source:ZFIN;Acc:ZDB-GENE-031202-2]
comp38652_c1_seq2	4.58336	ENSDARG00000012395	31.581	4.98098	4.84673	189.245	4.6468e-43	3.0064e-41	10	39959934	39979810	mmp13a	matrix metalloproteinase 13a [Source:ZFIN;Acc:ZDB-GENE-031202-2]
comp41247_c0_seq50	4.70486	ENSDARG00000012405	16.9086	4.07968	12.5502	306.284	1.4085e-68	2.3407e-66	3	23512288	23530699	col1a1a	collagen, type I, alpha 1a [Source:ZFIN;Acc:ZDB-GENE-030131-9102]
comp55857_c0_seq1	3.75915	ENSDARG00000012405	16.9086	4.07968	12.5502	306.284	1.4085e-68	2.3407e-66	3	23512288	23530699	col1a1a	collagen, type I, alpha 1a [Source:ZFIN;Acc:ZDB-GENE-030131-9102]
comp40906_c0_seq1	8.2382	ENSDARG00000012432	1.36843	0.452517	5.78585	15.1309	0.00010031	0.00025401	5	25254150	25265274	fam76b	family with sequence similarity 76, member B [Source:ZFIN;Acc:ZDB-GENE-030131-6955]
comp40906_c0_seq2	3.52359	ENSDARG00000012432	1.36843	0.452517	5.78585	15.1309	0.00010031	0.00025401	5	25254150	25265274	fam76b	family with sequence similarity 76, member B [Source:ZFIN;Acc:ZDB-GENE-030131-6955]
comp40906_c0_seq6	0.754394	ENSDARG00000012432	1.36843	0.452517	5.78585	15.1309	0.00010031	0.00025401	5	25254150	25265274	fam76b	family with sequence similarity 76, member B [Source:ZFIN;Acc:ZDB-GENE-030131-6955]
comp40906_c0_seq7	1.04786	ENSDARG00000012432	1.36843	0.452517	5.78585	15.1309	0.00010031	0.00025401	5	25254150	25265274	fam76b	family with sequence similarity 76, member B [Source:ZFIN;Acc:ZDB-GENE-030131-6955]
comp33795_c0_seq1	2.86833	ENSDARG00000012450	1.72731	0.788526	6.33664	23.5045	1.24621e-06	4.25897e-06	15	16362334	16392367	vmp1	vacuole membrane protein 1 [Source:ZFIN;Acc:ZDB-GENE-030131-8733]
comp30448_c0_seq1	2.70666	ENSDARG00000012485	6.2026	2.63287	3.17415	148.294	4.0913e-34	1.6203e-32	6	59788992	59803932	aurka	aurora kinase A [Source:ZFIN;Acc:ZDB-GENE-040801-161]
comp32641_c0_seq1	1.21566	ENSDARG00000012493	1.58717	0.66646	4.14002	23.672	1.14231e-06	3.92604e-06	20	705346	735879	senp6a	SUMO1/sentrin specific peptidase 6a [Source:ZFIN;Acc:ZDB-GENE-080204-25]
comp15636_c0_seq1	1.91605	ENSDARG00000012495	1.25359	0.326062	5.08752	6.04422	0.0139519	0.0238439	7	32109499	32116083	mphosph10	M-phase phosphoprotein 10 (U3 small nucleolar ribonucleoprotein) [Source:ZFIN;Acc:ZDB-GENE-030131-2146]
comp34995_c0_seq1	1.89883	ENSDARG00000012495	1.25359	0.326062	5.08752	6.04422	0.0139519	0.0238439	7	32109499	32116083	mphosph10	M-phase phosphoprotein 10 (U3 small nucleolar ribonucleoprotein) [Source:ZFIN;Acc:ZDB-GENE-030131-2146]
comp39276_c0_seq1	0.38222	ENSDARG00000012513	1.31919	0.399655	7.80421	10.0618	0.00151378	0.00310585	23	16819339	16852904	sdcbp2	syndecan binding protein (syntenin) 2 [Source:ZFIN;Acc:ZDB-GENE-030131-3727]
comp35963_c0_seq1	1.40239	ENSDARG00000012519	1.59376	0.672439	5.11053	20.4051	6.26622e-06	1.92321e-05	8	8043459	8104447	hcfc1b	host cell factor C1b [Source:ZFIN;Acc:ZDB-GENE-030131-2411]
comp7902_c0_seq1	0.450275	ENSDARG00000012572	1.36825	0.452336	3.66359	9.84842	0.00169978	0.00345645	22	25507210	25515573	polr3f	polymerase (RNA) III (DNA directed) polypeptide F [Source:ZFIN;Acc:ZDB-GENE-040426-972]
comp37514_c0_seq1	0.360607	ENSDARG00000012588	1.95405	0.966469	3.29945	23.4388	1.2895e-06	4.40071e-06	16	56808914	56832961	ptdss1a	phosphatidylserine synthase 1a [Source:ZFIN;Acc:ZDB-GENE-040426-837]
comp37514_c0_seq1	0.360607	ENSDARG00000012588	1.95405	0.966469	3.29945	23.4388	1.2895e-06	4.40071e-06	16	56808914	56832961	ptdss1a	phosphatidylserine synthase 1a [Source:ZFIN;Acc:ZDB-GENE-040426-837]
comp39272_c0_seq1	0.149454	ENSDARG00000012627	1.28284	0.359336	5.74883	8.06492	0.00451305	0.00850386	2	49569956	49593667	cdc34b	cell division cycle 34 homolog (S. cerevisiae) b [Source:ZFIN;Acc:ZDB-GENE-040718-439]
comp38041_c0_seq3	1.44685	ENSDARG00000012684	1.82101	0.86474	4.70758	45.2108	1.7692e-11	1.1083e-10	4	15142111	15189811	atp2b1a	ATPase, Ca++ transporting, plasma membrane 1a [Source:ZFIN;Acc:ZDB-GENE-030925-29]
comp47913_c0_seq1	1.46356	ENSDARG00000012738	1.7597	0.815333	3.15689	21.37	3.78654e-06	1.20786e-05	25	13323351	13379067	zcchc14	zinc finger, CCHC domain containing 14 [Source:ZFIN;Acc:ZDB-GENE-060503-319]
comp69046_c0_seq1	0.168352	ENSDARG00000012738	1.7597	0.815333	3.15689	21.37	3.78654e-06	1.20786e-05	25	13323351	13379067	zcchc14	zinc finger, CCHC domain containing 14 [Source:ZFIN;Acc:ZDB-GENE-060503-319]
comp74182_c0_seq1	5.67693	ENSDARG00000012738	1.7597	0.815333	3.15689	21.37	3.78654e-06	1.20786e-05	25	13323351	13379067	zcchc14	zinc finger, CCHC domain containing 14 [Source:ZFIN;Acc:ZDB-GENE-060503-319]
comp5088_c0_seq1	0.603846	ENSDARG00000012763	1.4174	0.503251	3.86055	13.184	0.00028236	0.00066291	1	33300917	33327476	arl13b	ADP-ribosylation factor-like 13b [Source:ZFIN;Acc:ZDB-GENE-021217-3]
comp37853_c0_seq3	1.08237	ENSDARG00000012796	7.73583	2.95156	0.330407	55.4219	9.7245e-14	7.667e-13	9	10362980	10370660	hnmt	histamine N-methyltransferase [Source:ZFIN;Acc:ZDB-GENE-040801-157]
comp36172_c0_seq2	0.971225	ENSDARG00000012820	1.2799	0.356033	8.12717	7.44791	0.00635102	0.0116134	21	10382767	10394208	nop56	NOP56 ribonucleoprotein homolog [Source:ZFIN;Acc:ZDB-GENE-040109-1]
comp36172_c0_seq2	0.971225	ENSDARG00000012820	1.2799	0.356033	8.12717	7.44791	0.00635102	0.0116134	21	10382767	10394208	nop56	NOP56 ribonucleoprotein homolog [Source:ZFIN;Acc:ZDB-GENE-040109-1]
comp33291_c0_seq4	10.0074	ENSDARG00000012823	2.62696	1.39339	0.500067	12.4817	0.00041096	0.00093769	6	1743679	1789029	dlgap4b	discs, large (Drosophila) homolog-associated protein 4b [Source:ZFIN;Acc:ZDB-GENE-101215-2]
comp33291_c0_seq5	0.846247	ENSDARG00000012823	2.62696	1.39339	0.500067	12.4817	0.00041096	0.00093769	6	1743679	1789029	dlgap4b	discs, large (Drosophila) homolog-associated protein 4b [Source:ZFIN;Acc:ZDB-GENE-101215-2]
comp33616_c0_seq1	0.766665	ENSDARG00000012824	3.37255	1.75384	3.528	93.8606	3.3855e-22	5.7792e-21	12	6123093	6198935	itga3b	integrin, alpha 3b [Source:ZFIN;Acc:ZDB-GENE-050411-55]
comp37635_c0_seq1	0.364706	ENSDARG00000012827	1.59761	0.675914	3.67128	22.9354	1.67538e-06	5.61586e-06	7	23045025	23055587	mettl3	methyltransferase like 3 [Source:ZFIN;Acc:ZDB-GENE-030131-9498]
comp39383_c0_seq2	0.511943	ENSDARG00000012848	1.19922	0.262096	5.68613	6.46438	0.0110058	0.0192428	8	26887566	26910344	arih2	ariadne homolog 2 (Drosophila) [Source:ZFIN;Acc:ZDB-GENE-040426-2158]
comp24670_c0_seq1	0.156052	ENSDARG00000012892	2.48486	1.31317	2.89551	47.8678	4.5595e-12	3.0179e-11	21	43245376	43267961	ammecr1	Alport syndrome, mental retardation, midface hypoplasia and elliptocytosis chromosomal region gene 1 homolog (human) [Source:ZFIN;Acc:ZDB-GENE-040426-1533]
comp24670_c0_seq1	0.156052	ENSDARG00000012892	2.48486	1.31317	2.89551	47.8678	4.5595e-12	3.0179e-11	21	43245376	43267961	ammecr1	Alport syndrome, mental retardation, midface hypoplasia and elliptocytosis chromosomal region gene 1 homolog (human) [Source:ZFIN;Acc:ZDB-GENE-040426-1533]
comp30850_c0_seq1	0.69825	ENSDARG00000012892	2.48486	1.31317	2.89551	47.8678	4.5595e-12	3.0179e-11	21	43245376	43267961	ammecr1	Alport syndrome, mental retardation, midface hypoplasia and elliptocytosis chromosomal region gene 1 homolog (human) [Source:ZFIN;Acc:ZDB-GENE-040426-1533]
comp38241_c0_seq1	0.945813	ENSDARG00000012942	1.88956	0.918052	4.69691	58.0078	2.6108e-14	2.1823e-13	9	23710848	23781360	itgb5	integrin, beta 5 [Source:ZFIN;Acc:ZDB-GENE-030131-6022]
comp39047_c0_seq1	1.30741	ENSDARG00000013004	2.61266	1.38552	5.47268	125.091	4.8619e-29	1.404e-27	25	19454854	19468155	tdg	thymine-DNA glycosylase [Source:ZFIN;Acc:ZDB-GENE-050522-44]
comp39047_c0_seq1	1.30741	ENSDARG00000013004	2.61266	1.38552	5.47268	125.091	4.8619e-29	1.404e-27	25	19454854	19468155	tdg	thymine-DNA glycosylase [Source:ZFIN;Acc:ZDB-GENE-050522-44]
comp39047_c0_seq1	1.30741	ENSDARG00000013004	2.61266	1.38552	5.47268	125.091	4.8619e-29	1.404e-27	25	19454854	19468155	tdg	thymine-DNA glycosylase [Source:ZFIN;Acc:ZDB-GENE-050522-44]
comp39047_c0_seq2	11.0023	ENSDARG00000013004	2.61266	1.38552	5.47268	125.091	4.8619e-29	1.404e-27	25	19454854	19468155	tdg	thymine-DNA glycosylase [Source:ZFIN;Acc:ZDB-GENE-050522-44]
comp39047_c0_seq2	11.0023	ENSDARG00000013004	2.61266	1.38552	5.47268	125.091	4.8619e-29	1.404e-27	25	19454854	19468155	tdg	thymine-DNA glycosylase [Source:ZFIN;Acc:ZDB-GENE-050522-44]
comp39047_c0_seq2	11.0023	ENSDARG00000013004	2.61266	1.38552	5.47268	125.091	4.8619e-29	1.404e-27	25	19454854	19468155	tdg	thymine-DNA glycosylase [Source:ZFIN;Acc:ZDB-GENE-050522-44]
comp55822_c0_seq1	0.958666	ENSDARG00000013006	1.98717	0.990713	2.28332	22.7137	1.88027e-06	6.25687e-06	1	34248735	34318010	pibf1	progesterone immunomodulatory binding factor 1 [Source:ZFIN;Acc:ZDB-GENE-040801-94]
comp56906_c0_seq1	4.30815	ENSDARG00000013006	1.98717	0.990713	2.28332	22.7137	1.88027e-06	6.25687e-06	1	34248735	34318010	pibf1	progesterone immunomodulatory binding factor 1 [Source:ZFIN;Acc:ZDB-GENE-040801-94]
comp60535_c0_seq1	3.75915	ENSDARG00000013006	1.98717	0.990713	2.28332	22.7137	1.88027e-06	6.25687e-06	1	34248735	34318010	pibf1	progesterone immunomodulatory binding factor 1 [Source:ZFIN;Acc:ZDB-GENE-040801-94]
comp66327_c0_seq1	0.74162	ENSDARG00000013006	1.98717	0.990713	2.28332	22.7137	1.88027e-06	6.25687e-06	1	34248735	34318010	pibf1	progesterone immunomodulatory binding factor 1 [Source:ZFIN;Acc:ZDB-GENE-040801-94]
comp77344_c0_seq1	4.30815	ENSDARG00000013006	1.98717	0.990713	2.28332	22.7137	1.88027e-06	6.25687e-06	1	34248735	34318010	pibf1	progesterone immunomodulatory binding factor 1 [Source:ZFIN;Acc:ZDB-GENE-040801-94]
comp41956_c0_seq1	0.730224	ENSDARG00000013095	1.24279	0.313587	4.43931	8.11336	0.00439401	0.00829338	13	2137586	2172613	gclc	glutamate-cysteine ligase, catalytic subunit [Source:ZFIN;Acc:ZDB-GENE-030131-5056]
comp32330_c0_seq1	0.470222	ENSDARG00000013329	1.28394	0.360581	3.76145	6.7157	0.00955675	0.0169234	7	20685861	20696002	ttc5	tetratricopeptide repeat domain 5 [Source:ZFIN;Acc:ZDB-GENE-050417-137]
comp38869_c0_seq1	8.7393	ENSDARG00000013343	7.37108	2.88188	2.33146	96.1952	1.041e-22	1.8832e-21	17	11370543	11579627	kif26ba	kinesin family member 26Ba [Source:ZFIN;Acc:ZDB-GENE-070521-4]
comp38869_c0_seq2	0.222494	ENSDARG00000013343	7.37108	2.88188	2.33146	96.1952	1.041e-22	1.8832e-21	17	11370543	11579627	kif26ba	kinesin family member 26Ba [Source:ZFIN;Acc:ZDB-GENE-070521-4]
comp46102_c0_seq1	1.27285	ENSDARG00000013343	7.37108	2.88188	2.33146	96.1952	1.041e-22	1.8832e-21	17	11370543	11579627	kif26ba	kinesin family member 26Ba [Source:ZFIN;Acc:ZDB-GENE-070521-4]
comp28712_c0_seq1	6.74939	ENSDARG00000013379	1.26543	0.339633	6.46541	10.1606	0.00143471	0.00296186	25	10813336	10841639	ppp6r3	protein phosphatase 6, regulatory subunit 3 [Source:ZFIN;Acc:ZDB-GENE-030131-3251]
comp28712_c0_seq1	6.74939	ENSDARG00000013379	1.26543	0.339633	6.46541	10.1606	0.00143471	0.00296186	25	10813336	10841639	ppp6r3	protein phosphatase 6, regulatory subunit 3 [Source:ZFIN;Acc:ZDB-GENE-030131-3251]
comp28712_c0_seq2	0.160884	ENSDARG00000013379	1.26543	0.339633	6.46541	10.1606	0.00143471	0.00296186	25	10813336	10841639	ppp6r3	protein phosphatase 6, regulatory subunit 3 [Source:ZFIN;Acc:ZDB-GENE-030131-3251]
comp28712_c0_seq2	0.160884	ENSDARG00000013379	1.26543	0.339633	6.46541	10.1606	0.00143471	0.00296186	25	10813336	10841639	ppp6r3	protein phosphatase 6, regulatory subunit 3 [Source:ZFIN;Acc:ZDB-GENE-030131-3251]
comp28712_c0_seq4	0.404296	ENSDARG00000013379	1.26543	0.339633	6.46541	10.1606	0.00143471	0.00296186	25	10813336	10841639	ppp6r3	protein phosphatase 6, regulatory subunit 3 [Source:ZFIN;Acc:ZDB-GENE-030131-3251]
comp28712_c0_seq4	0.404296	ENSDARG00000013379	1.26543	0.339633	6.46541	10.1606	0.00143471	0.00296186	25	10813336	10841639	ppp6r3	protein phosphatase 6, regulatory subunit 3 [Source:ZFIN;Acc:ZDB-GENE-030131-3251]
comp28712_c0_seq6	7.35772	ENSDARG00000013379	1.26543	0.339633	6.46541	10.1606	0.00143471	0.00296186	25	10813336	10841639	ppp6r3	protein phosphatase 6, regulatory subunit 3 [Source:ZFIN;Acc:ZDB-GENE-030131-3251]
comp28712_c0_seq6	7.35772	ENSDARG00000013379	1.26543	0.339633	6.46541	10.1606	0.00143471	0.00296186	25	10813336	10841639	ppp6r3	protein phosphatase 6, regulatory subunit 3 [Source:ZFIN;Acc:ZDB-GENE-030131-3251]
comp36803_c0_seq1	0.313845	ENSDARG00000013415	1.52764	0.611309	9.58128	13.904	0.00019239	0.00046376	16	32824415	32867877	lmna	lamin A [Source:ZFIN;Acc:ZDB-GENE-020424-3]
comp40158_c0_seq1	0.399016	ENSDARG00000013476	3.38241	1.75805	2.73251	60.313	8.0911e-15	7.0734e-14	4	11477727	11541748	arhgef39	Rho guanine nucleotide exchange factor (GEF) 39 [Source:ZFIN;Acc:ZDB-GENE-041114-28]
comp40158_c0_seq19	9.61608	ENSDARG00000013476	3.38241	1.75805	2.73251	60.313	8.0911e-15	7.0734e-14	4	11477727	11541748	arhgef39	Rho guanine nucleotide exchange factor (GEF) 39 [Source:ZFIN;Acc:ZDB-GENE-041114-28]
comp9891_c0_seq1	0.58854	ENSDARG00000013505	1.18882	0.249525	5.94942	5.78863	0.0161301	0.0272035	1	22085711	22097063	ube2kb	ubiquitin-conjugating enzyme E2Kb (UBC1 homolog, yeast) [Source:ZFIN;Acc:ZDB-GENE-980605-9]
comp39509_c0_seq1	2.54667	ENSDARG00000013670	3.17394	1.66628	7.37495	77.5488	1.2948e-18	1.6127e-17	10	30661376	30682722	hyou1	hypoxia up-regulated 1 [Source:ZFIN;Acc:ZDB-GENE-030131-5344]
comp39509_c0_seq2	2.16036	ENSDARG00000013670	3.17394	1.66628	7.37495	77.5488	1.2948e-18	1.6127e-17	10	30661376	30682722	hyou1	hypoxia up-regulated 1 [Source:ZFIN;Acc:ZDB-GENE-030131-5344]
comp30387_c0_seq1	0.826385	ENSDARG00000013708	1.28591	0.362791	7.11537	6.51241	0.0107124	0.0187783	9	34294638	34354348	usp9	ubiquitin specific peptidase 9 [Source:ZFIN;Acc:ZDB-GENE-061019-1]
comp30387_c0_seq2	0.955805	ENSDARG00000013708	1.28591	0.362791	7.11537	6.51241	0.0107124	0.0187783	9	34294638	34354348	usp9	ubiquitin specific peptidase 9 [Source:ZFIN;Acc:ZDB-GENE-061019-1]
comp45038_c0_seq1	0.240721	ENSDARG00000013708	1.28591	0.362791	7.11537	6.51241	0.0107124	0.0187783	9	34294638	34354348	usp9	ubiquitin specific peptidase 9 [Source:ZFIN;Acc:ZDB-GENE-061019-1]
comp29960_c0_seq1	1.56422	ENSDARG00000013719	4.68203	2.22713	2.3311	70.0416	5.8068e-17	6.1558e-16	25	20084387	20098470	gtse1	G-2 and S-phase expressed 1 [Source:ZFIN;Acc:ZDB-GENE-050522-493]
comp42568_c0_seq1	0.986787	ENSDARG00000013719	4.68203	2.22713	2.3311	70.0416	5.8068e-17	6.1558e-16	25	20084387	20098470	gtse1	G-2 and S-phase expressed 1 [Source:ZFIN;Acc:ZDB-GENE-050522-493]
comp12829_c0_seq1	0.958666	ENSDARG00000013763	2.306	1.20539	7.0767	53.3312	2.818e-13	2.1315e-12	13	33836178	33863525	rrbp1a	ribosome binding protein 1 homolog a (dog) [Source:ZFIN;Acc:ZDB-GENE-030131-9795]
comp38081_c0_seq1	0.719916	ENSDARG00000013763	2.306	1.20539	7.0767	53.3312	2.818e-13	2.1315e-12	13	33836178	33863525	rrbp1a	ribosome binding protein 1 homolog a (dog) [Source:ZFIN;Acc:ZDB-GENE-030131-9795]
comp38081_c0_seq2	2.10418	ENSDARG00000013763	2.306	1.20539	7.0767	53.3312	2.818e-13	2.1315e-12	13	33836178	33863525	rrbp1a	ribosome binding protein 1 homolog a (dog) [Source:ZFIN;Acc:ZDB-GENE-030131-9795]
comp38745_c0_seq1	0.309249	ENSDARG00000013776	1.75923	0.814942	5.58512	27.0121	2.0219e-07	7.72441e-07	11	7323094	7352166	thop1	thimet oligopeptidase 1 [Source:ZFIN;Acc:ZDB-GENE-040718-47]
comp48759_c0_seq1	0.274266	ENSDARG00000013776	1.75923	0.814942	5.58512	27.0121	2.0219e-07	7.72441e-07	11	7323094	7352166	thop1	thimet oligopeptidase 1 [Source:ZFIN;Acc:ZDB-GENE-040718-47]
comp17236_c0_seq1	1.0694	ENSDARG00000013780	3.70243	1.88847	2.74911	57.1069	4.1275e-14	3.3865e-13	18	4531600	4588784	glg1b	golgi glycoprotein 1b [Source:ZFIN;Acc:ZDB-GENE-060825-255]
comp28923_c0_seq1	0.221673	ENSDARG00000013780	3.70243	1.88847	2.74911	57.1069	4.1275e-14	3.3865e-13	18	4531600	4588784	glg1b	golgi glycoprotein 1b [Source:ZFIN;Acc:ZDB-GENE-060825-255]
comp28923_c0_seq1	0.221673	ENSDARG00000013780	3.70243	1.88847	2.74911	57.1069	4.1275e-14	3.3865e-13	18	4531600	4588784	glg1b	golgi glycoprotein 1b [Source:ZFIN;Acc:ZDB-GENE-060825-255]
comp28923_c0_seq2	2.17614	ENSDARG00000013780	3.70243	1.88847	2.74911	57.1069	4.1275e-14	3.3865e-13	18	4531600	4588784	glg1b	golgi glycoprotein 1b [Source:ZFIN;Acc:ZDB-GENE-060825-255]
comp39418_c0_seq1	0.493725	ENSDARG00000013834	2.60522	1.38141	0.0773775	11.1483	0.00084109	0.00180701	22	41997100	42038480	arhgef3	Rho guanine nucleotide exchange factor (GEF) 3 [Source:ZFIN;Acc:ZDB-GENE-050208-773]
comp56547_c0_seq1	0.979333	ENSDARG00000013842	2.11409	1.08004	0.552482	12.2055	0.0004765	0.00107351	7	62891154	62955428	tbc1d19	TBC1 domain family, member 19 [Source:ZFIN;Acc:ZDB-GENE-040426-1265]
comp66953_c0_seq1	1.56913	ENSDARG00000013842	2.11409	1.08004	0.552482	12.2055	0.0004765	0.00107351	7	62891154	62955428	tbc1d19	TBC1 domain family, member 19 [Source:ZFIN;Acc:ZDB-GENE-040426-1265]
comp38237_c0_seq1	0.819573	ENSDARG00000013861	1.29654	0.374671	3.77125	7.5989	0.00584039	0.0107621	24	25309728	25332232	armc1	armadillo repeat containing 1 [Source:ZFIN;Acc:ZDB-GENE-041212-33]
comp32904_c0_seq1	0.839076	ENSDARG00000013881	1.6045	0.682122	4.90233	40.4456	2.0217e-10	1.12175e-09	1	13985428	14011921	pi4k2b	phosphatidylinositol 4-kinase type 2 beta [Source:ZFIN;Acc:ZDB-GENE-070112-990]
comp32904_c0_seq2	1.35724	ENSDARG00000013881	1.6045	0.682122	4.90233	40.4456	2.0217e-10	1.12175e-09	1	13985428	14011921	pi4k2b	phosphatidylinositol 4-kinase type 2 beta [Source:ZFIN;Acc:ZDB-GENE-070112-990]
comp26086_c0_seq1	0.224817	ENSDARG00000013926	2.36661	1.24282	4.42754	38.0699	6.8254e-10	3.57752e-09	17	20483926	20496769	slc16a9a	solute carrier family 16 (monocarboxylic acid transporters), member 9a [Source:ZFIN;Acc:ZDB-GENE-040426-1364]
comp32159_c0_seq1	1.30228	ENSDARG00000014017	1.49422	0.579396	6.30991	21.5079	3.5238e-06	1.12915e-05	21	29535097	29550468	rrm1	ribonucleotide reductase M1 polypeptide [Source:ZFIN;Acc:ZDB-GENE-990415-247]
comp15740_c0_seq1	0.864407	ENSDARG00000014041	1.82652	0.869099	5.09686	40.9804	1.5376e-10	8.6392e-10	8	30484010	30500457	smarcad1	SWI/SNF-related, matrix-associated actin-dependent regulator of chromatin, subfamily a, containing DEAD/H box 1 [Source:ZFIN;Acc:ZDB-GENE-050522-499]
comp40271_c0_seq3	0.744278	ENSDARG00000014098	1.54415	0.626814	2.77061	13.0974	0.00029571	0.00069159	1	51045922	51064113	pkd2	polycystic kidney disease 2 [Source:ZFIN;Acc:ZDB-GENE-040827-4]
comp41105_c0_seq1	7.30149	ENSDARG00000014106	5.02535	2.32922	3.19357	120.772	4.2865e-28	1.1607e-26	17	9871855	9890018	cfl2	cofilin 2 (muscle) [Source:ZFIN;Acc:ZDB-GENE-040426-1815]
comp41105_c0_seq1	7.30149	ENSDARG00000014106	5.02535	2.32922	3.19357	120.772	4.2865e-28	1.1607e-26	17	9871855	9890018	cfl2	cofilin 2 (muscle) [Source:ZFIN;Acc:ZDB-GENE-040426-1815]
comp41105_c0_seq4	9.20549	ENSDARG00000014106	5.02535	2.32922	3.19357	120.772	4.2865e-28	1.1607e-26	17	9871855	9890018	cfl2	cofilin 2 (muscle) [Source:ZFIN;Acc:ZDB-GENE-040426-1815]
comp41105_c0_seq4	9.20549	ENSDARG00000014106	5.02535	2.32922	3.19357	120.772	4.2865e-28	1.1607e-26	17	9871855	9890018	cfl2	cofilin 2 (muscle) [Source:ZFIN;Acc:ZDB-GENE-040426-1815]
comp41105_c0_seq7	9.72697	ENSDARG00000014106	5.02535	2.32922	3.19357	120.772	4.2865e-28	1.1607e-26	17	9871855	9890018	cfl2	cofilin 2 (muscle) [Source:ZFIN;Acc:ZDB-GENE-040426-1815]
comp41105_c0_seq7	9.72697	ENSDARG00000014106	5.02535	2.32922	3.19357	120.772	4.2865e-28	1.1607e-26	17	9871855	9890018	cfl2	cofilin 2 (muscle) [Source:ZFIN;Acc:ZDB-GENE-040426-1815]
comp41105_c0_seq8	6.74939	ENSDARG00000014106	5.02535	2.32922	3.19357	120.772	4.2865e-28	1.1607e-26	17	9871855	9890018	cfl2	cofilin 2 (muscle) [Source:ZFIN;Acc:ZDB-GENE-040426-1815]
comp41105_c0_seq8	6.74939	ENSDARG00000014106	5.02535	2.32922	3.19357	120.772	4.2865e-28	1.1607e-26	17	9871855	9890018	cfl2	cofilin 2 (muscle) [Source:ZFIN;Acc:ZDB-GENE-040426-1815]
comp41312_c0_seq1	0.0490855	ENSDARG00000014106	5.02535	2.32922	3.19357	120.772	4.2865e-28	1.1607e-26	17	9871855	9890018	cfl2	cofilin 2 (muscle) [Source:ZFIN;Acc:ZDB-GENE-040426-1815]
comp41519_c0_seq1	0.329643	ENSDARG00000014106	5.02535	2.32922	3.19357	120.772	4.2865e-28	1.1607e-26	17	9871855	9890018	cfl2	cofilin 2 (muscle) [Source:ZFIN;Acc:ZDB-GENE-040426-1815]
comp41534_c0_seq1	0.0980598	ENSDARG00000014106	5.02535	2.32922	3.19357	120.772	4.2865e-28	1.1607e-26	17	9871855	9890018	cfl2	cofilin 2 (muscle) [Source:ZFIN;Acc:ZDB-GENE-040426-1815]
comp44950_c0_seq1	1.24273	ENSDARG00000014106	5.02535	2.32922	3.19357	120.772	4.2865e-28	1.1607e-26	17	9871855	9890018	cfl2	cofilin 2 (muscle) [Source:ZFIN;Acc:ZDB-GENE-040426-1815]
comp10561_c0_seq2	1.42548	ENSDARG00000014147	2.95028	1.56085	4.38868	90.0246	2.3522e-21	3.7439e-20	3	56617061	56636704	axin2	axin 2 (conductin, axil) [Source:ZFIN;Acc:ZDB-GENE-000403-2]
comp34790_c0_seq1	0.685626	ENSDARG00000014147	2.95028	1.56085	4.38868	90.0246	2.3522e-21	3.7439e-20	3	56617061	56636704	axin2	axin 2 (conductin, axil) [Source:ZFIN;Acc:ZDB-GENE-000403-2]
comp30833_c0_seq1	0.342587	ENSDARG00000014161	1.28093	0.357191	3.1816	4.82321	0.028079	0.0449789	12	21055319	21070814	ercc4	excision repair cross-complementing rodent repair deficiency, complementation group 4 [Source:ZFIN;Acc:ZDB-GENE-030131-5533]
comp61940_c0_seq1	1.25132	ENSDARG00000014161	1.28093	0.357191	3.1816	4.82321	0.028079	0.0449789	12	21055319	21070814	ercc4	excision repair cross-complementing rodent repair deficiency, complementation group 4 [Source:ZFIN;Acc:ZDB-GENE-030131-5533]
comp33994_c0_seq1	1.57145	ENSDARG00000014292	1.3114	0.391104	4.39388	10.1793	0.00142026	0.00293461	21	17744431	17761760	med15	mediator complex subunit 15 [Source:ZFIN;Acc:ZDB-GENE-040426-2032]
comp38645_c0_seq1	1.0221	ENSDARG00000014303	1.34694	0.429684	4.08539	9.42794	0.00213704	0.00426979	25	17949831	17971040	vac14	vac14 homolog (S. cerevisiae) [Source:ZFIN;Acc:ZDB-GENE-040912-82]
comp36782_c0_seq1	0.43809	ENSDARG00000014311	3.01777	1.59348	3.44314	86.0201	1.7811e-20	2.6186e-19	25	5202451	5227221	athl1	ATH1, acid trehalase-like 1 (yeast) [Source:ZFIN;Acc:ZDB-GENE-061103-319]
comp36782_c0_seq1	0.43809	ENSDARG00000014311	3.01777	1.59348	3.44314	86.0201	1.7811e-20	2.6186e-19	25	5202451	5227221	athl1	ATH1, acid trehalase-like 1 (yeast) [Source:ZFIN;Acc:ZDB-GENE-061103-319]
comp28682_c0_seq1	0.427959	ENSDARG00000014329	2.08104	1.05731	8.03854	30.7803	2.8895e-08	1.23158e-07	10	22234687	22245329	npm1a	nucleophosmin 1a [Source:ZFIN;Acc:ZDB-GENE-021028-1]
comp33957_c0_seq1	0.779093	ENSDARG00000014329	2.08104	1.05731	8.03854	30.7803	2.8895e-08	1.23158e-07	10	22234687	22245329	npm1a	nucleophosmin 1a [Source:ZFIN;Acc:ZDB-GENE-021028-1]
comp32788_c0_seq1	0.527419	ENSDARG00000014378	1.58522	0.664687	5.65693	31.3167	2.19188e-08	9.49031e-08	7	36737566	36768914	slc12a4	solute carrier family 12 (potassium/chloride transporters), member 4 [Source:ZFIN;Acc:ZDB-GENE-090218-27]
comp36956_c0_seq4	1.65867	ENSDARG00000014378	1.58522	0.664687	5.65693	31.3167	2.19188e-08	9.49031e-08	7	36737566	36768914	slc12a4	solute carrier family 12 (potassium/chloride transporters), member 4 [Source:ZFIN;Acc:ZDB-GENE-090218-27]
comp36956_c0_seq4	1.65867	ENSDARG00000014378	1.58522	0.664687	5.65693	31.3167	2.19188e-08	9.49031e-08	7	36737566	36768914	slc12a4	solute carrier family 12 (potassium/chloride transporters), member 4 [Source:ZFIN;Acc:ZDB-GENE-090218-27]
comp36956_c0_seq4	1.65867	ENSDARG00000014378	1.58522	0.664687	5.65693	31.3167	2.19188e-08	9.49031e-08	7	36737566	36768914	slc12a4	solute carrier family 12 (potassium/chloride transporters), member 4 [Source:ZFIN;Acc:ZDB-GENE-090218-27]
comp36956_c0_seq4	1.65867	ENSDARG00000014378	1.58522	0.664687	5.65693	31.3167	2.19188e-08	9.49031e-08	7	36737566	36768914	slc12a4	solute carrier family 12 (potassium/chloride transporters), member 4 [Source:ZFIN;Acc:ZDB-GENE-090218-27]
comp36956_c0_seq4	1.65867	ENSDARG00000014378	1.58522	0.664687	5.65693	31.3167	2.19188e-08	9.49031e-08	7	36737566	36768914	slc12a4	solute carrier family 12 (potassium/chloride transporters), member 4 [Source:ZFIN;Acc:ZDB-GENE-090218-27]
comp44604_c0_seq1	2.25293	ENSDARG00000014378	1.58522	0.664687	5.65693	31.3167	2.19188e-08	9.49031e-08	7	36737566	36768914	slc12a4	solute carrier family 12 (potassium/chloride transporters), member 4 [Source:ZFIN;Acc:ZDB-GENE-090218-27]
comp50252_c0_seq1	0.34565	ENSDARG00000014378	1.58522	0.664687	5.65693	31.3167	2.19188e-08	9.49031e-08	7	36737566	36768914	slc12a4	solute carrier family 12 (potassium/chloride transporters), member 4 [Source:ZFIN;Acc:ZDB-GENE-090218-27]
comp55662_c0_seq1	0.294132	ENSDARG00000014378	1.58522	0.664687	5.65693	31.3167	2.19188e-08	9.49031e-08	7	36737566	36768914	slc12a4	solute carrier family 12 (potassium/chloride transporters), member 4 [Source:ZFIN;Acc:ZDB-GENE-090218-27]
comp37019_c0_seq1	1.89941	ENSDARG00000014385	2.58814	1.37191	2.37406	44.6082	2.4068e-11	1.4825e-10	21	21673131	21680230	chek1	CHK1 checkpoint homolog (S. pombe) [Source:ZFIN;Acc:ZDB-GENE-040426-896]
comp41735_c0_seq1	0.497521	ENSDARG00000014498	1.51879	0.602921	4.90858	29.933	4.47228e-08	1.85899e-07	17	27266839	27278240	yth2	YTH domain family 2 [Source:ZFIN;Acc:ZDB-GENE-040426-948]
comp10143_c0_seq1	0.911499	ENSDARG00000014571	2.4808	1.31081	8.78391	80.9223	2.3477e-19	3.1285e-18	16	7435502	7458987	ctnnb1	catenin (cadherin-associated protein), beta 1 [Source:ZFIN;Acc:ZDB-GENE-980526-362]
comp10143_c0_seq1	0.911499	ENSDARG00000014571	2.4808	1.31081	8.78391	80.9223	2.3477e-19	3.1285e-18	16	7435502	7458987	ctnnb1	catenin (cadherin-associated protein), beta 1 [Source:ZFIN;Acc:ZDB-GENE-980526-362]
comp4300_c0_seq1	0.200607	ENSDARG00000014571	2.4808	1.31081	8.78391	80.9223	2.3477e-19	3.1285e-18	16	7435502	7458987	ctnnb1	catenin (cadherin-associated protein), beta 1 [Source:ZFIN;Acc:ZDB-GENE-980526-362]
comp52863_c0_seq1	0.115094	ENSDARG00000014571	2.4808	1.31081	8.78391	80.9223	2.3477e-19	3.1285e-18	16	7435502	7458987	ctnnb1	catenin (cadherin-associated protein), beta 1 [Source:ZFIN;Acc:ZDB-GENE-980526-362]
comp18464_c0_seq1	1.6727	ENSDARG00000014685	2.4042	1.26556	4.12954	61.8489	3.7084e-15	3.3472e-14	20	39369598	39383863	esco2	establishment of cohesion 1 homolog 2 [Source:ZFIN;Acc:ZDB-GENE-050913-156]
comp18318_c0_seq1	0.566428	ENSDARG00000014770	1.57772	0.657844	5.97446	22.8515	1.75011e-06	5.85016e-06	6	42276415	42300596	usp4	ubiquitin specific protease 4 (proto-oncogene) [Source:ZFIN;Acc:ZDB-GENE-041008-187]
comp18318_c0_seq2	0.658551	ENSDARG00000014770	1.57772	0.657844	5.97446	22.8515	1.75011e-06	5.85016e-06	6	42276415	42300596	usp4	ubiquitin specific protease 4 (proto-oncogene) [Source:ZFIN;Acc:ZDB-GENE-041008-187]
comp38659_c0_seq1	0.709928	ENSDARG00000014770	1.57772	0.657844	5.97446	22.8515	1.75011e-06	5.85016e-06	6	42276415	42300596	usp4	ubiquitin specific protease 4 (proto-oncogene) [Source:ZFIN;Acc:ZDB-GENE-041008-187]
comp38659_c0_seq1	0.709928	ENSDARG00000014770	1.57772	0.657844	5.97446	22.8515	1.75011e-06	5.85016e-06	6	42276415	42300596	usp4	ubiquitin specific protease 4 (proto-oncogene) [Source:ZFIN;Acc:ZDB-GENE-041008-187]
comp46438_c0_seq1	1.10517	ENSDARG00000014770	1.57772	0.657844	5.97446	22.8515	1.75011e-06	5.85016e-06	6	42276415	42300596	usp4	ubiquitin specific protease 4 (proto-oncogene) [Source:ZFIN;Acc:ZDB-GENE-041008-187]
comp30496_c0_seq1	1.71001	ENSDARG00000014817	1.24703	0.318502	8.05596	6.53925	0.010552	0.0185296	5	20790450	20798338	ranbp1	RAN binding protein 1 [Source:ZFIN;Acc:ZDB-GENE-040426-2548]
comp33831_c0_seq1	0.318713	ENSDARG00000014859	1.91812	0.939693	5.03061	48.1702	3.9078e-12	2.6141e-11	20	7037979	7090577	igfbp3	insulin-like growth factor binding protein 3 [Source:ZFIN;Acc:ZDB-GENE-040412-1]
comp35118_c0_seq1	1.07926	ENSDARG00000014907	2.83832	1.50504	8.10263	133.424	7.3015e-31	2.4221e-29	12	12494768	12563669	htra1b	HtrA serine peptidase 1b [Source:ZFIN;Acc:ZDB-GENE-080219-7]
comp23858_c0_seq1	0.114642	ENSDARG00000014941	1.46579	0.551683	3.34733	11.4311	0.00072224	0.00157017	4	27682167	27684344	tprkb	Tp53rk binding protein [Source:ZFIN;Acc:ZDB-GENE-041114-68]
comp37555_c0_seq1	6.98184	ENSDARG00000014943	4.6713	2.22382	4.66054	158.311	2.6462e-36	1.1681e-34	18	20217003	20239123	kif23	kinesin family member 23 [Source:ZFIN;Acc:ZDB-GENE-991019-4]
comp37555_c0_seq2	1.14733	ENSDARG00000014943	4.6713	2.22382	4.66054	158.311	2.6462e-36	1.1681e-34	18	20217003	20239123	kif23	kinesin family member 23 [Source:ZFIN;Acc:ZDB-GENE-991019-4]
comp37555_c0_seq2	1.14733	ENSDARG00000014943	4.6713	2.22382	4.66054	158.311	2.6462e-36	1.1681e-34	18	20217003	20239123	kif23	kinesin family member 23 [Source:ZFIN;Acc:ZDB-GENE-991019-4]
comp37555_c0_seq3	10.4111	ENSDARG00000014943	4.6713	2.22382	4.66054	158.311	2.6462e-36	1.1681e-34	18	20217003	20239123	kif23	kinesin family member 23 [Source:ZFIN;Acc:ZDB-GENE-991019-4]
comp37555_c0_seq3	10.4111	ENSDARG00000014943	4.6713	2.22382	4.66054	158.311	2.6462e-36	1.1681e-34	18	20217003	20239123	kif23	kinesin family member 23 [Source:ZFIN;Acc:ZDB-GENE-991019-4]
comp37555_c0_seq4	5.84372	ENSDARG00000014943	4.6713	2.22382	4.66054	158.311	2.6462e-36	1.1681e-34	18	20217003	20239123	kif23	kinesin family member 23 [Source:ZFIN;Acc:ZDB-GENE-991019-4]
comp29298_c0_seq1	0.167453	ENSDARG00000014954	1.82961	0.871539	3.05547	15.6241	7.7264e-05	0.00019907	25	6804194	6834347	snx33	sorting nexin 33 [Source:ZFIN;Acc:ZDB-GENE-041111-209]
comp31818_c0_seq1	2.24493	ENSDARG00000014969	1.66333	0.734073	1.6452	14.1972	0.00016462	0.00040168	2	31675429	31724187	ankhb	ankylosis, progressive homolog b [Source:ZFIN;Acc:ZDB-GENE-030131-2458]
comp32168_c0_seq2	0.412174	ENSDARG00000015006	1.3645	0.448376	5.76105	12.8631	0.00033513	0.00077628	25	20721130	20750191	dnm1l	dynamin 1-like [Source:ZFIN;Acc:ZDB-GENE-040426-1556]
comp17452_c0_seq1	1.47645	ENSDARG00000015033	1.86866	0.902	0.116915	5.74941	0.0164942	0.0277622	21	28835478	28855195	slc23a1	solute carrier family 23 (nucleobase transporters), member 1 [Source:ZFIN;Acc:ZDB-GENE-080804-2]
comp25106_c0_seq1	0.0679371	ENSDARG00000015053	7.30198	2.86829	1.29747	85.9511	1.8444e-20	2.7069e-19	4	12100394	12320337	grip1	glutamate receptor interacting protein 1 [Source:ZFIN;Acc:ZDB-GENE-041210-125]
comp24397_c0_seq1	8.9368	ENSDARG00000015070	1.98126	0.986421	4.13389	42.1002	8.6716e-11	4.9913e-10	8	17694196	17703882	pola2	polymerase (DNA directed), alpha 2 [Source:ZFIN;Acc:ZDB-GENE-030131-778]
comp24397_c0_seq2	0.838156	ENSDARG00000015070	1.98126	0.986421	4.13389	42.1002	8.6716e-11	4.9913e-10	8	17694196	17703882	pola2	polymerase (DNA directed), alpha 2 [Source:ZFIN;Acc:ZDB-GENE-030131-778]
comp30334_c0_seq1	1.53664	ENSDARG00000015088	2.44807	1.29165	6.64053	75.8099	3.1233e-18	3.7442e-17	9	33674334	33682033	dnajb11	DnaJ (Hsp40) homolog, subfamily B, member 11 [Source:ZFIN;Acc:ZDB-GENE-031113-9]
comp16044_c0_seq1	1.10739	ENSDARG00000015111	1.78508	0.83599	7.12551	38.113	6.6763e-10	3.50261e-09	3	6136694	6161664	ddx39ab	DEAD (Asp-Glu-Ala-Asp) box polypeptide 39Ab [Source:ZFIN;Acc:ZDB-GENE-040426-2902]
comp16462_c0_seq1	0.532301	ENSDARG00000015126	1.58158	0.66137	6.20341	28.3234	1.02645e-07	4.07385e-07	6	3678916	3689991	gorasp2	golgi reassembly stacking protein 2 [Source:ZFIN;Acc:ZDB-GENE-040426-1659]
comp12086_c0_seq1	0.836088	ENSDARG00000015176	1.41686	0.502698	2.0156	4.84096	0.0277914	0.0445646	6	31464352	31680110	ror1	receptor tyrosine kinase-like orphan receptor 1 [Source:ZFIN;Acc:ZDB-GENE-030131-6104]
comp46031_c0_seq1	0.63821	ENSDARG00000015176	1.41686	0.502698	2.0156	4.84096	0.0277914	0.0445646	6	31464352	31680110	ror1	receptor tyrosine kinase-like orphan receptor 1 [Source:ZFIN;Acc:ZDB-GENE-030131-6104]
comp48122_c0_seq1	1.12803	ENSDARG00000015176	1.41686	0.502698	2.0156	4.84096	0.0277914	0.0445646	6	31464352	31680110	ror1	receptor tyrosine kinase-like orphan receptor 1 [Source:ZFIN;Acc:ZDB-GENE-030131-6104]
comp8478_c0_seq1	1.46356	ENSDARG00000015176	1.41686	0.502698	2.0156	4.84096	0.0277914	0.0445646	6	31464352	31680110	ror1	receptor tyrosine kinase-like orphan receptor 1 [Source:ZFIN;Acc:ZDB-GENE-030131-6104]
comp32415_c0_seq1	0.394986	ENSDARG00000015239	1.65838	0.729771	5.95206	35.8353	2.14718e-09	1.0602e-08	14	13971682	13985135	prp19	PRP19/PSO4 homolog (S. cerevisiae) [Source:ZFIN;Acc:ZDB-GENE-030131-263]
comp10277_c0_seq1	0.34565	ENSDARG00000015252	2.92056	1.54625	1.23534	34.1955	4.98443e-09	2.34112e-08	2	17085994	17214190	st3gal3b	ST3 beta-galactoside alpha-2,3-sialyltransferase 3b [Source:ZFIN;Acc:ZDB-GENE-050411-13]
comp38256_c0_seq1	7.93974	ENSDARG00000015252	2.92056	1.54625	1.23534	34.1955	4.98443e-09	2.34112e-08	2	17085994	17214190	st3gal3b	ST3 beta-galactoside alpha-2,3-sialyltransferase 3b [Source:ZFIN;Acc:ZDB-GENE-050411-13]
comp38256_c0_seq1	7.93974	ENSDARG00000015252	2.92056	1.54625	1.23534	34.1955	4.98443e-09	2.34112e-08	2	17085994	17214190	st3gal3b	ST3 beta-galactoside alpha-2,3-sialyltransferase 3b [Source:ZFIN;Acc:ZDB-GENE-050411-13]
comp63658_c0_seq1	2.08614	ENSDARG00000015252	2.92056	1.54625	1.23534	34.1955	4.98443e-09	2.34112e-08	2	17085994	17214190	st3gal3b	ST3 beta-galactoside alpha-2,3-sialyltransferase 3b [Source:ZFIN;Acc:ZDB-GENE-050411-13]
comp38304_c0_seq1	0.0440407	ENSDARG00000015310	2.09682	1.0682	5.21325	76.6263	2.0657e-18	2.5198e-17	3	14936862	14957032	pitpnbl	phosphatidylinositol transfer protein, beta, like [Source:ZFIN;Acc:ZDB-GENE-040426-2791]
comp27904_c0_seq1	0.309654	ENSDARG00000015314	2.92435	1.54811	5.24781	153.362	3.192e-35	1.336e-33	5	23857038	23866246	zc4h2	zinc finger, C4H2 domain containing [Source:ZFIN;Acc:ZDB-GENE-030131-2207]
comp32604_c0_seq1	0.657026	ENSDARG00000015325	1.19203	0.253426	6.46786	5.17012	0.0229787	0.0375505	9	9451858	9464189	u2af1	U2(RNU2) small nuclear RNA auxiliary factor 1 [Source:ZFIN;Acc:ZDB-GENE-020419-1]
comp32604_c0_seq2	1.76331	ENSDARG00000015325	1.19203	0.253426	6.46786	5.17012	0.0229787	0.0375505	9	9451858	9464189	u2af1	U2(RNU2) small nuclear RNA auxiliary factor 1 [Source:ZFIN;Acc:ZDB-GENE-020419-1]
comp16114_c0_seq1	2.00511	ENSDARG00000015392	1.36814	0.452219	6.27978	13.6326	0.00022229	0.00053146	7	73835483	73888548	dhx15	DEAH (Asp-Glu-Ala-His) box polypeptide 15 [Source:ZFIN;Acc:ZDB-GENE-030131-650]
comp16114_c0_seq2	0.814754	ENSDARG00000015392	1.36814	0.452219	6.27978	13.6326	0.00022229	0.00053146	7	73835483	73888548	dhx15	DEAH (Asp-Glu-Ala-His) box polypeptide 15 [Source:ZFIN;Acc:ZDB-GENE-030131-650]
comp41006_c0_seq1	9.48336	ENSDARG00000015403	4.40766	2.14001	3.70132	109.29	1.4017e-25	3.2328e-24	17	734495	755832	arhgap11a	Rho GTPase activating protein 11A [Source:ZFIN;Acc:ZDB-GENE-040426-2562]
comp41006_c0_seq2	8.67436	ENSDARG00000015403	4.40766	2.14001	3.70132	109.29	1.4017e-25	3.2328e-24	17	734495	755832	arhgap11a	Rho GTPase activating protein 11A [Source:ZFIN;Acc:ZDB-GENE-040426-2562]
comp41006_c0_seq3	10.3775	ENSDARG00000015403	4.40766	2.14001	3.70132	109.29	1.4017e-25	3.2328e-24	17	734495	755832	arhgap11a	Rho GTPase activating protein 11A [Source:ZFIN;Acc:ZDB-GENE-040426-2562]
comp41006_c0_seq7	1.08688	ENSDARG00000015403	4.40766	2.14001	3.70132	109.29	1.4017e-25	3.2328e-24	17	734495	755832	arhgap11a	Rho GTPase activating protein 11A [Source:ZFIN;Acc:ZDB-GENE-040426-2562]
comp30455_c0_seq1	0.918211	ENSDARG00000015427	1.52471	0.608536	7.95442	31.0561	2.50682e-08	1.07878e-07	19	31054097	31064046	hdac1	histone deacetylase 1 [Source:ZFIN;Acc:ZDB-GENE-020419-32]
comp41560_c0_seq1	0.541758	ENSDARG00000015427	1.52471	0.608536	7.95442	31.0561	2.50682e-08	1.07878e-07	19	31054097	31064046	hdac1	histone deacetylase 1 [Source:ZFIN;Acc:ZDB-GENE-020419-32]
comp59127_c0_seq1	0.181262	ENSDARG00000015427	1.52471	0.608536	7.95442	31.0561	2.50682e-08	1.07878e-07	19	31054097	31064046	hdac1	histone deacetylase 1 [Source:ZFIN;Acc:ZDB-GENE-020419-32]
comp67970_c0_seq1	3.24031	ENSDARG00000015427	1.52471	0.608536	7.95442	31.0561	2.50682e-08	1.07878e-07	19	31054097	31064046	hdac1	histone deacetylase 1 [Source:ZFIN;Acc:ZDB-GENE-020419-32]
comp42046_c0_seq1	0.38958	ENSDARG00000015453	2.38701	1.2552	1.30431	12.6893	0.00036776	0.00084654	5	7033030	7081061	me2	malic enzyme 2, NAD(+)-dependent, mitochondrial [Source:ZFIN;Acc:ZDB-GENE-040801-147]
comp27268_c0_seq1	1.89824	ENSDARG00000015460	4.25865	2.0904	3.91508	143.446	4.6957e-33	1.7341e-31	23	33974077	33988915	racgap1	Rac GTPase-activating protein 1 [Source:ZFIN;Acc:ZDB-GENE-030131-1917]
comp37430_c0_seq1	0.391925	ENSDARG00000015472	1.52318	0.607082	4.66049	14.4525	0.00014374	0.00035456	14	31961765	32020938	gpc4	glypican 4 [Source:ZFIN;Acc:ZDB-GENE-011119-1]
comp10948_c0_seq2	0.952183	ENSDARG00000015538	1.39826	0.483638	5.23811	17.4923	2.88466e-05	7.98333e-05	3	34319325	34330321	znf207a	zinc finger protein 207, a [Source:ZFIN;Acc:ZDB-GENE-040426-2273]
comp10984_c0_seq1	1.11407	ENSDARG00000015566	1.91575	0.937911	4.04237	29.6175	5.26264e-08	2.16938e-07	17	37107098	37222477	dnmt3ab	DNA (cytosine-5-)-methyltransferase 3 alpha b [Source:ZFIN;Acc:ZDB-GENE-050314-3]
comp14936_c0_seq1	2.05051	ENSDARG00000015566	1.91575	0.937911	4.04237	29.6175	5.26264e-08	2.16938e-07	17	37107098	37222477	dnmt3ab	DNA (cytosine-5-)-methyltransferase 3 alpha b [Source:ZFIN;Acc:ZDB-GENE-050314-3]
comp45931_c0_seq1	1.69499	ENSDARG00000015566	1.91575	0.937911	4.04237	29.6175	5.26264e-08	2.16938e-07	17	37107098	37222477	dnmt3ab	DNA (cytosine-5-)-methyltransferase 3 alpha b [Source:ZFIN;Acc:ZDB-GENE-050314-3]
comp39517_c0_seq1	0.782037	ENSDARG00000015576	2.38054	1.25129	2.20218	42.3266	7.7235e-11	4.4759e-10	13	25627303	25632277	itprip	inositol 1,4,5-triphosphate receptor interacting protein [Source:ZFIN;Acc:ZDB-GENE-050417-422]
comp39517_c0_seq1	0.782037	ENSDARG00000015576	2.38054	1.25129	2.20218	42.3266	7.7235e-11	4.4759e-10	13	25627303	25632277	itprip	inositol 1,4,5-triphosphate receptor interacting protein [Source:ZFIN;Acc:ZDB-GENE-050417-422]
comp12336_c0_seq1	1.49064	ENSDARG00000015674	9.20691	3.20272	6.41151	203.199	4.1862e-46	3.1399e-44	13	24886128	24888558	msxc	muscle segment homeobox C [Source:ZFIN;Acc:ZDB-GENE-980526-306]
comp26657_c0_seq1	0.485472	ENSDARG00000015681	1.44565	0.531716	5.82365	23.1046	1.53424e-06	5.16933e-06	16	12946298	12996004	gsk3ab	glycogen synthase kinase 3 alpha b [Source:ZFIN;Acc:ZDB-GENE-990714-3]
comp26657_c0_seq1	0.485472	ENSDARG00000015681	1.44565	0.531716	5.82365	23.1046	1.53424e-06	5.16933e-06	16	12946298	12996004	gsk3ab	glycogen synthase kinase 3 alpha b [Source:ZFIN;Acc:ZDB-GENE-990714-3]
comp31027_c0_seq1	0.787879	ENSDARG00000015731	3.12397	1.64338	1.03832	28.3698	1.00215e-07	3.98297e-07	25	36250857	36305544	ano5a	anoctamin 5a [Source:ZFIN;Acc:ZDB-GENE-091013-2]
comp16767_c0_seq1	4.27332	ENSDARG00000015797	21.4243	4.42118	5.015	160.422	9.1507e-37	4.1364e-35	15	32039949	32048776	mmp13b	matrix metalloproteinase 13b [Source:ZFIN;Acc:ZDB-GENE-030131-6152]
comp33931_c0_seq1	11.8728	ENSDARG00000015797	21.4243	4.42118	5.015	160.422	9.1507e-37	4.1364e-35	15	32039949	32048776	mmp13b	matrix metalloproteinase 13b [Source:ZFIN;Acc:ZDB-GENE-030131-6152]
comp39862_c0_seq1	8.95515	ENSDARG00000015797	21.4243	4.42118	5.015	160.422	9.1507e-37	4.1364e-35	15	32039949	32048776	mmp13b	matrix metalloproteinase 13b [Source:ZFIN;Acc:ZDB-GENE-030131-6152]
comp39862_c0_seq2	11.1167	ENSDARG00000015797	21.4243	4.42118	5.015	160.422	9.1507e-37	4.1364e-35	15	32039949	32048776	mmp13b	matrix metalloproteinase 13b [Source:ZFIN;Acc:ZDB-GENE-030131-6152]
comp39878_c0_seq1	4.36793	ENSDARG00000015797	21.4243	4.42118	5.015	160.422	9.1507e-37	4.1364e-35	15	32039949	32048776	mmp13b	matrix metalloproteinase 13b [Source:ZFIN;Acc:ZDB-GENE-030131-6152]
comp39878_c0_seq2	4.34985	ENSDARG00000015797	21.4243	4.42118	5.015	160.422	9.1507e-37	4.1364e-35	15	32039949	32048776	mmp13b	matrix metalloproteinase 13b [Source:ZFIN;Acc:ZDB-GENE-030131-6152]
comp41014_c0_seq1	2.54258	ENSDARG00000015797	21.4243	4.42118	5.015	160.422	9.1507e-37	4.1364e-35	15	32039949	32048776	mmp13b	matrix metalloproteinase 13b [Source:ZFIN;Acc:ZDB-GENE-030131-6152]
comp41014_c0_seq2	12.2167	ENSDARG00000015797	21.4243	4.42118	5.015	160.422	9.1507e-37	4.1364e-35	15	32039949	32048776	mmp13b	matrix metalloproteinase 13b [Source:ZFIN;Acc:ZDB-GENE-030131-6152]
comp41100_c0_seq1	5.65571	ENSDARG00000015797	21.4243	4.42118	5.015	160.422	9.1507e-37	4.1364e-35	15	32039949	32048776	mmp13b	matrix metalloproteinase 13b [Source:ZFIN;Acc:ZDB-GENE-030131-6152]
comp56988_c0_seq1	5.99321	ENSDARG00000015797	21.4243	4.42118	5.015	160.422	9.1507e-37	4.1364e-35	15	32039949	32048776	mmp13b	matrix metalloproteinase 13b [Source:ZFIN;Acc:ZDB-GENE-030131-6152]
comp65091_c0_seq1	6.25247	ENSDARG00000015797	21.4243	4.42118	5.015	160.422	9.1507e-37	4.1364e-35	15	32039949	32048776	mmp13b	matrix metalloproteinase 13b [Source:ZFIN;Acc:ZDB-GENE-030131-6152]
comp8268_c0_seq1	4.48994	ENSDARG00000015797	21.4243	4.42118	5.015	160.422	9.1507e-37	4.1364e-35	15	32039949	32048776	mmp13b	matrix metalloproteinase 13b [Source:ZFIN;Acc:ZDB-GENE-030131-6152]
comp39025_c1_seq1	1.42945	ENSDARG00000015824	1.82941	0.871377	5.27673	55.2016	1.0878e-13	8.5447e-13	4	11980752	11994610	lemd3	LEM domain containing 3 [Source:ZFIN;Acc:ZDB-GENE-030131-490]
comp40546_c0_seq1	0.0156075	ENSDARG00000015824	1.82941	0.871377	5.27673	55.2016	1.0878e-13	8.5447e-13	4	11980752	11994610	lemd3	LEM domain containing 3 [Source:ZFIN;Acc:ZDB-GENE-030131-490]
comp25593_c0_seq1	0.492426	ENSDARG00000015835	1.232	0.300997	4.9456	7.65015	0.00567676	0.0104891	23	44555187	44567688	eif4e2rs1	eukaryotic translation initiation factor 4E family member 2 related sequence 1 [Source:ZFIN;Acc:ZDB-GENE-040426-1728]
comp9006_c0_seq1	0.166474	ENSDARG00000015889	1.52137	0.605375	6.63304	23.9344	9.96755e-07	3.44605e-06	9	11941029	11952723	zc3h15	zinc finger CCCH-type containing 15 [Source:ZFIN;Acc:ZDB-GENE-030131-6239]
comp42990_c0_seq1	0.0804615	ENSDARG00000015890	6.09006	2.60646	4.73355	190.837	2.0872e-43	1.366e-41	18	29352112	29363210	maf	v-maf musculoaponeurotic fibrosarcoma (avian) oncogene homolog [Source:ZFIN;Acc:ZDB-GENE-010605-2]
comp36812_c0_seq1	0.607269	ENSDARG00000015901	1.55013	0.632393	3.25663	15.9467	6.515e-05	0.00016996	2	18274382	18292829	ptbp2b	polypyrimidine tract binding protein 2b [Source:ZFIN;Acc:ZDB-GENE-060810-49]
comp45091_c0_seq1	0.0504474	ENSDARG00000015959	4.56465	2.1905	3.64128	126.161	2.8353e-29	8.3006e-28	7	48338942	48342349	TSHZ3	teashirt zinc finger homeobox 3 [Source:HGNC Symbol;Acc:HGNC:30700]
comp7136_c0_seq1	0.740759	ENSDARG00000015959	4.56465	2.1905	3.64128	126.161	2.8353e-29	8.3006e-28	7	48338942	48342349	TSHZ3	teashirt zinc finger homeobox 3 [Source:HGNC Symbol;Acc:HGNC:30700]
comp33936_c0_seq1	0.83383	ENSDARG00000015989	1.40641	0.492019	3.12991	11.3487	0.00075502	0.00163535	12	3427851	3447851	zdhhc16b	zinc finger, DHHC domain containing 16b [Source:ZFIN;Acc:ZDB-GENE-040426-1301]
comp42389_c0_seq1	1.16044	ENSDARG00000015998	2.33118	1.22106	3.79639	43.1901	4.9671e-11	2.946e-10	17	14991018	15030636	wdhd1	WD repeat and HMG-box DNA binding protein 1 [Source:ZFIN;Acc:ZDB-GENE-030131-1665]
comp32122_c0_seq2	2.38609	ENSDARG00000016022	9.48096	3.24503	2.53533	192.762	7.932e-44	5.3355e-42	9	32307416	32347632	zic5	zic family member 5 (odd-paired homolog, Drosophila) [Source:ZFIN;Acc:ZDB-GENE-040622-1]
comp23566_c0_seq1	0.309286	ENSDARG00000016044	1.93948	0.955669	2.93247	23.2388	1.43084e-06	4.84987e-06	8	54694451	54709562	gins4	GINS complex subunit 4 (Sld5 homolog) [Source:ZFIN;Acc:ZDB-GENE-040801-59]
comp37930_c0_seq1	1.07649	ENSDARG00000016084	1.59495	0.673509	2.40503	8.40401	0.00374394	0.00715566	2	39288262	39380025	spsb4a	splA/ryanodine receptor domain and SOCS box containing 4a [Source:ZFIN;Acc:ZDB-GENE-070911-3]
comp72085_c0_seq1	0.717353	ENSDARG00000016086	1.21147	0.276763	3.85193	4.86714	0.0273728	0.0439692	3	40684994	40763330	smurf1	SMAD specific E3 ubiquitin protein ligase 1 [Source:ZFIN;Acc:ZDB-GENE-040426-2744]
comp7998_c0_seq1	1.70936	ENSDARG00000016086	1.21147	0.276763	3.85193	4.86714	0.0273728	0.0439692	3	40684994	40763330	smurf1	SMAD specific E3 ubiquitin protein ligase 1 [Source:ZFIN;Acc:ZDB-GENE-040426-2744]
comp29527_c0_seq1	0.82657	ENSDARG00000016093	1.49349	0.578688	2.62127	10.2344	0.00137845	0.00285677	24	21647271	21698969	qtrtd1	queuine tRNA-ribosyltransferase domain containing 1 [Source:ZFIN;Acc:ZDB-GENE-060427-4]
comp16574_c0_seq1	0.0971561	ENSDARG00000016128	2.03631	1.02595	3.88887	59.6558	1.1299e-14	9.7467e-14	5	16079025	16094360	ap3m2	adaptor-related protein complex 3, mu 2 subunit [Source:ZFIN;Acc:ZDB-GENE-021022-2]
comp38524_c0_seq1	0.188777	ENSDARG00000016153	1.46524	0.55114	6.03404	17.6	2.72585e-05	7.591e-05	22	36015344	36078398	dag1	dystroglycan 1 [Source:ZFIN;Acc:ZDB-GENE-021223-1]
comp38524_c0_seq1	0.188777	ENSDARG00000016153	1.46524	0.55114	6.03404	17.6	2.72585e-05	7.591e-05	22	36015344	36078398	dag1	dystroglycan 1 [Source:ZFIN;Acc:ZDB-GENE-021223-1]
comp12784_c0_seq1	0.561143	ENSDARG00000016154	1.26085	0.334398	5.934	4.73309	0.0295877	0.0472084	17	37960135	37963383	zfp36l1a	zinc finger protein 36, C3H type-like 1a [Source:ZFIN;Acc:ZDB-GENE-030131-9860]
comp56048_c0_seq1	0.59041	ENSDARG00000016173	1.50766	0.592308	8.33109	24.3443	8.05659e-07	2.82572e-06	16	32712336	32724833	cct3	chaperonin containing TCP1, subunit 3 (gamma) [Source:ZFIN;Acc:ZDB-GENE-020419-5]
comp2069_c0_seq1	1.11407	ENSDARG00000016181	1.27137	0.346384	4.50241	8.03173	0.0045965	0.00864189	8	11702090	11750361	trim33	tripartite motif-containing 33 [Source:ZFIN;Acc:ZDB-GENE-030131-2773]
comp27675_c0_seq2	0.285263	ENSDARG00000016181	1.27137	0.346384	4.50241	8.03173	0.0045965	0.00864189	8	11702090	11750361	trim33	tripartite motif-containing 33 [Source:ZFIN;Acc:ZDB-GENE-030131-2773]
comp45619_c0_seq1	1.26632	ENSDARG00000016181	1.27137	0.346384	4.50241	8.03173	0.0045965	0.00864189	8	11702090	11750361	trim33	tripartite motif-containing 33 [Source:ZFIN;Acc:ZDB-GENE-030131-2773]
comp47138_c0_seq1	1.55362	ENSDARG00000016181	1.27137	0.346384	4.50241	8.03173	0.0045965	0.00864189	8	11702090	11750361	trim33	tripartite motif-containing 33 [Source:ZFIN;Acc:ZDB-GENE-030131-2773]
comp54563_c0_seq1	0.750086	ENSDARG00000016181	1.27137	0.346384	4.50241	8.03173	0.0045965	0.00864189	8	11702090	11750361	trim33	tripartite motif-containing 33 [Source:ZFIN;Acc:ZDB-GENE-030131-2773]
comp71999_c0_seq1	0.486037	ENSDARG00000016181	1.27137	0.346384	4.50241	8.03173	0.0045965	0.00864189	8	11702090	11750361	trim33	tripartite motif-containing 33 [Source:ZFIN;Acc:ZDB-GENE-030131-2773]
comp15381_c0_seq1	2.05055	ENSDARG00000016188	1.46908	0.55491	7.17906	5.05704	0.0245261	0.0397991	22	17916268	18005300	SBNO2 (2 of 2)	strawberry notch homolog 2 (Drosophila) [Source:HGNC Symbol;Acc:HGNC:29158]
comp31158_c0_seq1	1.69499	ENSDARG00000016188	1.46908	0.55491	7.17906	5.05704	0.0245261	0.0397991	22	17916268	18005300	SBNO2 (2 of 2)	strawberry notch homolog 2 (Drosophila) [Source:HGNC Symbol;Acc:HGNC:29158]
comp31158_c0_seq1	1.69499	ENSDARG00000016188	1.46908	0.55491	7.17906	5.05704	0.0245261	0.0397991	22	17916268	18005300	SBNO2 (2 of 2)	strawberry notch homolog 2 (Drosophila) [Source:HGNC Symbol;Acc:HGNC:29158]
comp31158_c0_seq3	0.470154	ENSDARG00000016188	1.46908	0.55491	7.17906	5.05704	0.0245261	0.0397991	22	17916268	18005300	SBNO2 (2 of 2)	strawberry notch homolog 2 (Drosophila) [Source:HGNC Symbol;Acc:HGNC:29158]
comp39998_c0_seq2	1.08134	ENSDARG00000016188	1.46908	0.55491	7.17906	5.05704	0.0245261	0.0397991	22	17916268	18005300	SBNO2 (2 of 2)	strawberry notch homolog 2 (Drosophila) [Source:HGNC Symbol;Acc:HGNC:29158]
comp34484_c0_seq3	8.53499	ENSDARG00000016200	1.4083	0.493954	5.3601	9.66113	0.00188208	0.00379213	11	24994383	24999049	trib3	tribbles homolog 3 (Drosophila) [Source:ZFIN;Acc:ZDB-GENE-040426-2609]
comp27739_c0_seq1	0.879461	ENSDARG00000016393	1.53659	0.61973	7.76454	25.2188	5.11813e-07	1.84905e-06	24	37889052	37896283	arf1l	ADP-ribosylation factor 1 like [Source:ZFIN;Acc:ZDB-GENE-030131-5234]
comp38939_c0_seq1	0.67521	ENSDARG00000016429	2.71627	1.44163	5.01821	168.787	1.3621e-38	6.8715e-37	6	26656321	26746857	farp2	FERM, RhoGEF and pleckstrin domain protein 2 [Source:ZFIN;Acc:ZDB-GENE-030131-2993]
comp33853_c0_seq1	0.264565	ENSDARG00000016447	1.34337	0.425858	5.45386	13.3644	0.00025644	0.00060632	8	23958060	23973195	ythdf1	YTH domain family, member 1 [Source:ZFIN;Acc:ZDB-GENE-040426-2786]
comp30422_c0_seq1	0.311246	ENSDARG00000016470	1.71461	0.777878	8.15231	29.4221	5.82087e-08	2.38736e-07	1	21428978	21439189	anxa5b	annexin A5b [Source:ZFIN;Acc:ZDB-GENE-030131-9076]
comp34309_c0_seq1	1.15883	ENSDARG00000016496	2.32052	1.21445	4.7097	64.7211	8.6287e-16	8.2964e-15	24	22122231	22147292	cdk8	cyclin-dependent kinase 8 [Source:ZFIN;Acc:ZDB-GENE-030903-2]
comp34309_c0_seq2	2.07451	ENSDARG00000016496	2.32052	1.21445	4.7097	64.7211	8.6287e-16	8.2964e-15	24	22122231	22147292	cdk8	cyclin-dependent kinase 8 [Source:ZFIN;Acc:ZDB-GENE-030903-2]
comp16520_c0_seq1	1.77983	ENSDARG00000016514	1.75369	0.810396	3.74135	35.9181	2.05785e-09	1.01877e-08	5	27865560	27877617	gtf2h2	general transcription factor IIH, polypeptide 2 [Source:ZFIN;Acc:ZDB-GENE-030131-1959]
comp32826_c0_seq1	1.31567	ENSDARG00000016548	1.77606	0.828683	7.45411	44.7145	2.2797e-11	1.4103e-10	1	46396047	46426613	eif5b	eukaryotic translation initiation factor 5B [Source:ZFIN;Acc:ZDB-GENE-050208-20]
comp36401_c0_seq2	0.854653	ENSDARG00000016551	1.76835	0.822404	4.95009	40.1765	2.3203e-10	1.27989e-09	11	27637741	27990634	IQSEC1 (1 of 2)	IQ motif and Sec7 domain 1 [Source:HGNC Symbol;Acc:HGNC:29112]
comp5707_c0_seq1	0.91508	ENSDARG00000016594	1.95978	0.970689	2.5944	24.9833	5.78285e-07	2.07066e-06	5	1813138	1834555	haus4	HAUS augmin-like complex, subunit 4 [Source:ZFIN;Acc:ZDB-GENE-040718-122]
comp24020_c0_seq1	0.309163	ENSDARG00000016608	1.68523	0.752944	3.35552	15.3687	8.844e-05	0.00022584	12	5669582	5701663	fra10ac1	fragile site, folic acid type, rare, candidate 1 [Source:ZFIN;Acc:ZDB-GENE-041010-95]
comp40894_c0_seq1	0.685367	ENSDARG00000016630	1.4618	0.547742	5.67392	15.6646	7.56269e-05	0.00019524	20	34063889	34094564	tprb	translocated promoter region b (to activated MET oncogene) [Source:ZFIN;Acc:ZDB-GENE-030131-6410]
comp40894_c0_seq1	0.685367	ENSDARG00000016630	1.4618	0.547742	5.67392	15.6646	7.56269e-05	0.00019524	20	34063889	34094564	tprb	translocated promoter region b (to activated MET oncogene) [Source:ZFIN;Acc:ZDB-GENE-030131-6410]
comp40894_c0_seq2	6.10974	ENSDARG00000016630	1.4618	0.547742	5.67392	15.6646	7.56269e-05	0.00019524	20	34063889	34094564	tprb	translocated promoter region b (to activated MET oncogene) [Source:ZFIN;Acc:ZDB-GENE-030131-6410]
comp37645_c0_seq1	1.30593	ENSDARG00000016733	2.66325	1.41319	6.52361	51.6829	6.523e-13	4.7496e-12	5	72352361	72365894	psat1	phosphoserine aminotransferase 1 [Source:ZFIN;Acc:ZDB-GENE-030131-5723]
comp41140_c0_seq3	3.68721	ENSDARG00000016744	63.1208	5.98004	5.27151	298.203	8.1168e-67	1.2859e-64	22	3998379	4039283	fbn2b	fibrillin 2b [Source:ZFIN;Acc:ZDB-GENE-090112-3]
comp77590_c0_seq1	1.15883	ENSDARG00000016744	63.1208	5.98004	5.27151	298.203	8.1168e-67	1.2859e-64	22	3998379	4039283	fbn2b	fibrillin 2b [Source:ZFIN;Acc:ZDB-GENE-090112-3]
comp61434_c0_seq1	2.04096	ENSDARG00000016763	1.47635	0.562031	4.1508	21.1549	4.23616e-06	1.34144e-05	17	49571295	49594814	znf292a	zinc finger protein 292a [Source:ZFIN;Acc:ZDB-GENE-071004-18]
comp40918_c0_seq1	1.17002	ENSDARG00000016811	1.37709	0.461622	4.35638	11.0877	0.00086903	0.0018616	19	27125761	27159524	ints3	integrator complex subunit 3 [Source:ZFIN;Acc:ZDB-GENE-060503-634]
comp32716_c0_seq1	2.86195	ENSDARG00000016830	2.83966	1.50572	4.33141	82.9817	8.2815e-20	1.1525e-18	8	27721048	27740251	rimkla	ribosomal modification protein rimK-like family member A [Source:ZFIN;Acc:ZDB-GENE-040912-20]
comp32716_c0_seq12	0.55456	ENSDARG00000016830	2.83966	1.50572	4.33141	82.9817	8.2815e-20	1.1525e-18	8	27721048	27740251	rimkla	ribosomal modification protein rimK-like family member A [Source:ZFIN;Acc:ZDB-GENE-040912-20]
comp32716_c0_seq2	9.49594	ENSDARG00000016830	2.83966	1.50572	4.33141	82.9817	8.2815e-20	1.1525e-18	8	27721048	27740251	rimkla	ribosomal modification protein rimK-like family member A [Source:ZFIN;Acc:ZDB-GENE-040912-20]
comp32716_c0_seq4	6.98184	ENSDARG00000016830	2.83966	1.50572	4.33141	82.9817	8.2815e-20	1.1525e-18	8	27721048	27740251	rimkla	ribosomal modification protein rimK-like family member A [Source:ZFIN;Acc:ZDB-GENE-040912-20]
comp32716_c0_seq8	0.531834	ENSDARG00000016830	2.83966	1.50572	4.33141	82.9817	8.2815e-20	1.1525e-18	8	27721048	27740251	rimkla	ribosomal modification protein rimK-like family member A [Source:ZFIN;Acc:ZDB-GENE-040912-20]
comp40671_c0_seq1	0.0434025	ENSDARG00000016864	1.64667	0.719551	5.37782	26.8148	2.2392e-07	8.50093e-07	15	40792143	40811082	farsb	phenylalanyl-tRNA synthetase, beta subunit [Source:ZFIN;Acc:ZDB-GENE-021206-2]
comp40671_c0_seq3	0.908923	ENSDARG00000016864	1.64667	0.719551	5.37782	26.8148	2.2392e-07	8.50093e-07	15	40792143	40811082	farsb	phenylalanyl-tRNA synthetase, beta subunit [Source:ZFIN;Acc:ZDB-GENE-021206-2]
comp40671_c0_seq4	0.654632	ENSDARG00000016864	1.64667	0.719551	5.37782	26.8148	2.2392e-07	8.50093e-07	15	40792143	40811082	farsb	phenylalanyl-tRNA synthetase, beta subunit [Source:ZFIN;Acc:ZDB-GENE-021206-2]
comp14829_c0_seq1	0.337491	ENSDARG00000016903	1.78648	0.83712	6.17884	50.6169	1.1227e-12	7.9396e-12	21	16871613	16887766	wdr5	WD repeat domain 5 [Source:ZFIN;Acc:ZDB-GENE-040426-2082]
comp40635_c0_seq3	0.368985	ENSDARG00000016934	2.1756	1.12141	3.04455	41.7627	1.0305e-10	5.8914e-10	12	40106346	40236087	ttyh2	tweety homolog 2 (Drosophila) [Source:ZFIN;Acc:ZDB-GENE-040718-193]
comp40635_c0_seq7	10.5074	ENSDARG00000016934	2.1756	1.12141	3.04455	41.7627	1.0305e-10	5.8914e-10	12	40106346	40236087	ttyh2	tweety homolog 2 (Drosophila) [Source:ZFIN;Acc:ZDB-GENE-040718-193]
comp11244_c0_seq1	0.175216	ENSDARG00000016936	1.77589	0.828546	4.27532	16.8053	4.14177e-05	0.00011162	20	34181916	34317215	hmcn1	hemicentin 1 [Source:ZFIN;Acc:ZDB-GENE-041014-322]
comp20048_c0_seq1	0.180742	ENSDARG00000016936	1.77589	0.828546	4.27532	16.8053	4.14177e-05	0.00011162	20	34181916	34317215	hmcn1	hemicentin 1 [Source:ZFIN;Acc:ZDB-GENE-041014-322]
comp2056_c0_seq1	0.717353	ENSDARG00000016936	1.77589	0.828546	4.27532	16.8053	4.14177e-05	0.00011162	20	34181916	34317215	hmcn1	hemicentin 1 [Source:ZFIN;Acc:ZDB-GENE-041014-322]
comp32483_c0_seq1	2.02986	ENSDARG00000016936	1.77589	0.828546	4.27532	16.8053	4.14177e-05	0.00011162	20	34181916	34317215	hmcn1	hemicentin 1 [Source:ZFIN;Acc:ZDB-GENE-041014-322]
comp32950_c0_seq1	0.0449774	ENSDARG00000016936	1.77589	0.828546	4.27532	16.8053	4.14177e-05	0.00011162	20	34181916	34317215	hmcn1	hemicentin 1 [Source:ZFIN;Acc:ZDB-GENE-041014-322]
comp371_c0_seq1	0.59041	ENSDARG00000016936	1.77589	0.828546	4.27532	16.8053	4.14177e-05	0.00011162	20	34181916	34317215	hmcn1	hemicentin 1 [Source:ZFIN;Acc:ZDB-GENE-041014-322]
comp55049_c0_seq1	0.34565	ENSDARG00000016936	1.77589	0.828546	4.27532	16.8053	4.14177e-05	0.00011162	20	34181916	34317215	hmcn1	hemicentin 1 [Source:ZFIN;Acc:ZDB-GENE-041014-322]
comp60960_c0_seq1	5.27127	ENSDARG00000016936	1.77589	0.828546	4.27532	16.8053	4.14177e-05	0.00011162	20	34181916	34317215	hmcn1	hemicentin 1 [Source:ZFIN;Acc:ZDB-GENE-041014-322]
comp68526_c0_seq1	1.89752	ENSDARG00000016936	1.77589	0.828546	4.27532	16.8053	4.14177e-05	0.00011162	20	34181916	34317215	hmcn1	hemicentin 1 [Source:ZFIN;Acc:ZDB-GENE-041014-322]
comp70672_c0_seq1	0.717353	ENSDARG00000016936	1.77589	0.828546	4.27532	16.8053	4.14177e-05	0.00011162	20	34181916	34317215	hmcn1	hemicentin 1 [Source:ZFIN;Acc:ZDB-GENE-041014-322]
comp73043_c0_seq1	1.89752	ENSDARG00000016936	1.77589	0.828546	4.27532	16.8053	4.14177e-05	0.00011162	20	34181916	34317215	hmcn1	hemicentin 1 [Source:ZFIN;Acc:ZDB-GENE-041014-322]
comp73892_c0_seq1	0.394676	ENSDARG00000016936	1.77589	0.828546	4.27532	16.8053	4.14177e-05	0.00011162	20	34181916	34317215	hmcn1	hemicentin 1 [Source:ZFIN;Acc:ZDB-GENE-041014-322]
comp80795_c0_seq1	4.30815	ENSDARG00000016936	1.77589	0.828546	4.27532	16.8053	4.14177e-05	0.00011162	20	34181916	34317215	hmcn1	hemicentin 1 [Source:ZFIN;Acc:ZDB-GENE-041014-322]
comp817_c0_seq1	0.168352	ENSDARG00000016936	1.77589	0.828546	4.27532	16.8053	4.14177e-05	0.00011162	20	34181916	34317215	hmcn1	hemicentin 1 [Source:ZFIN;Acc:ZDB-GENE-041014-322]
comp8293_c0_seq1	0.175216	ENSDARG00000016936	1.77589	0.828546	4.27532	16.8053	4.14177e-05	0.00011162	20	34181916	34317215	hmcn1	hemicentin 1 [Source:ZFIN;Acc:ZDB-GENE-041014-322]
comp8905_c0_seq1	5.27127	ENSDARG00000016936	1.77589	0.828546	4.27532	16.8053	4.14177e-05	0.00011162	20	34181916	34317215	hmcn1	hemicentin 1 [Source:ZFIN;Acc:ZDB-GENE-041014-322]
comp41196_c0_seq1	8.7393	ENSDARG00000016968	1.353	0.436162	6.2997	14.7305	0.00012403	0.00030912	4	470796	486492	tmem214	transmembrane protein 214 [Source:ZFIN;Acc:ZDB-GENE-110307-2]
comp41196_c0_seq2	11.2037	ENSDARG00000016968	1.353	0.436162	6.2997	14.7305	0.00012403	0.00030912	4	470796	486492	tmem214	transmembrane protein 214 [Source:ZFIN;Acc:ZDB-GENE-110307-2]
comp41196_c0_seq4	0.594958	ENSDARG00000016968	1.353	0.436162	6.2997	14.7305	0.00012403	0.00030912	4	470796	486492	tmem214	transmembrane protein 214 [Source:ZFIN;Acc:ZDB-GENE-110307-2]
comp39507_c0_seq1	11.5856	ENSDARG00000017004	1.21746	0.283875	4.40171	4.74442	0.0293934	0.0469293	2	42705883	42806051	myo10	myosin X [Source:ZFIN;Acc:ZDB-GENE-070912-277]
comp39507_c0_seq1	11.5856	ENSDARG00000017004	1.21746	0.283875	4.40171	4.74442	0.0293934	0.0469293	2	42705883	42806051	myo10	myosin X [Source:ZFIN;Acc:ZDB-GENE-070912-277]
comp39507_c0_seq1	11.5856	ENSDARG00000017004	1.21746	0.283875	4.40171	4.74442	0.0293934	0.0469293	2	42705883	42806051	myo10	myosin X [Source:ZFIN;Acc:ZDB-GENE-070912-277]
comp39507_c0_seq3	1.17014	ENSDARG00000017004	1.21746	0.283875	4.40171	4.74442	0.0293934	0.0469293	2	42705883	42806051	myo10	myosin X [Source:ZFIN;Acc:ZDB-GENE-070912-277]
comp39507_c0_seq3	1.17014	ENSDARG00000017004	1.21746	0.283875	4.40171	4.74442	0.0293934	0.0469293	2	42705883	42806051	myo10	myosin X [Source:ZFIN;Acc:ZDB-GENE-070912-277]
comp39507_c0_seq3	1.17014	ENSDARG00000017004	1.21746	0.283875	4.40171	4.74442	0.0293934	0.0469293	2	42705883	42806051	myo10	myosin X [Source:ZFIN;Acc:ZDB-GENE-070912-277]
comp58080_c0_seq1	0.717353	ENSDARG00000017004	1.21746	0.283875	4.40171	4.74442	0.0293934	0.0469293	2	42705883	42806051	myo10	myosin X [Source:ZFIN;Acc:ZDB-GENE-070912-277]
comp32964_c0_seq1	1.37557	ENSDARG00000017058	1.99605	0.997149	2.28891	17.2181	3.33247e-05	9.14057e-05	18	43614246	43674113	gyltl1b	glycosyltransferase-like 1b [Source:ZFIN;Acc:ZDB-GENE-050419-253]
comp32964_c0_seq1	1.37557	ENSDARG00000017058	1.99605	0.997149	2.28891	17.2181	3.33247e-05	9.14057e-05	18	43614246	43674113	gyltl1b	glycosyltransferase-like 1b [Source:ZFIN;Acc:ZDB-GENE-050419-253]
comp33211_c0_seq1	0.10012	ENSDARG00000017067	1.37606	0.460545	5.60496	13.8339	0.0001997	0.00048037	10	25830712	25838818	chordc1b	cysteine and histidine-rich domain (CHORD) containing 1b [Source:ZFIN;Acc:ZDB-GENE-040426-1288]
comp38448_c0_seq1	0.194691	ENSDARG00000017121	2.3377	1.22509	5.60304	43.0497	5.3368e-11	3.1542e-10	23	3420382	3423555	mafba	v-maf musculoaponeurotic fibrosarcoma oncogene family, protein B (avian) [Source:ZFIN;Acc:ZDB-GENE-980526-515]
comp39032_c0_seq1	0.901637	ENSDARG00000017128	2.14101	1.09829	7.80197	58.3788	2.1621e-14	1.8216e-13	13	29462452	29512846	MYOF	Uncharacterized protein [Source:UniProtKB/TrEMBL;Acc:E7EXL6]
comp39032_c0_seq2	1.28137	ENSDARG00000017128	2.14101	1.09829	7.80197	58.3788	2.1621e-14	1.8216e-13	13	29462452	29512846	MYOF	Uncharacterized protein [Source:UniProtKB/TrEMBL;Acc:E7EXL6]
comp39032_c0_seq3	0.00768323	ENSDARG00000017128	2.14101	1.09829	7.80197	58.3788	2.1621e-14	1.8216e-13	13	29462452	29512846	MYOF	Uncharacterized protein [Source:UniProtKB/TrEMBL;Acc:E7EXL6]
comp39032_c0_seq4	0.386887	ENSDARG00000017128	2.14101	1.09829	7.80197	58.3788	2.1621e-14	1.8216e-13	13	29462452	29512846	MYOF	Uncharacterized protein [Source:UniProtKB/TrEMBL;Acc:E7EXL6]
comp50203_c0_seq1	1.03502	ENSDARG00000017155	4.76803	2.25339	1.1877	72.6042	1.5844e-17	1.7798e-16	9	11656091	11685923	wnt10a	wingless-type MMTV integration site family, member 10a [Source:ZFIN;Acc:ZDB-GENE-990415-278]
comp33372_c0_seq1	0.266352	ENSDARG00000017180	1.73888	0.798162	6.53256	32.8491	9.95986e-09	4.50333e-08	2	4310671	4353828	npc1	Niemann-Pick disease, type C1 [Source:ZFIN;Acc:ZDB-GENE-030131-3161]
comp42196_c0_seq1	0.638052	ENSDARG00000017230	1.25904	0.33232	5.65557	8.52683	0.00349948	0.00672254	10	21525859	21551798	fbxw11b	F-box and WD-40 domain protein 11b [Source:ZFIN;Acc:ZDB-GENE-040426-2903]
comp30819_c0_seq1	1.3079	ENSDARG00000017244	1.76997	0.823727	4.6689	41.2007	1.3738e-10	7.7571e-10	6	51526743	51617558	CHD6	chromodomain helicase DNA binding protein 6 [Source:HGNC Symbol;Acc:HGNC:19057]
comp31836_c0_seq1	1.39419	ENSDARG00000017244	1.76997	0.823727	4.6689	41.2007	1.3738e-10	7.7571e-10	6	51526743	51617558	CHD6	chromodomain helicase DNA binding protein 6 [Source:HGNC Symbol;Acc:HGNC:19057]
comp32781_c0_seq1	1.45111	ENSDARG00000017244	1.76997	0.823727	4.6689	41.2007	1.3738e-10	7.7571e-10	6	51526743	51617558	CHD6	chromodomain helicase DNA binding protein 6 [Source:HGNC Symbol;Acc:HGNC:19057]
comp63289_c0_seq1	0.34565	ENSDARG00000017261	1.7647	0.819427	3.52967	22.8839	1.72091e-06	5.75935e-06	15	15905211	15913890	gdpd1	glycerophosphodiester phosphodiesterase domain containing 1 [Source:ZFIN;Acc:ZDB-GENE-040822-22]
comp30159_c0_seq1	2.6247	ENSDARG00000017298	1.86479	0.899014	3.04064	20.2615	6.75468e-06	2.06081e-05	13	942599	957874	plek	pleckstrin [Source:ZFIN;Acc:ZDB-GENE-040426-1506]
comp34838_c0_seq1	2.65549	ENSDARG00000017311	1.85543	0.891752	4.9365	25.8048	3.77744e-07	1.38776e-06	2	45546372	45566044	gpsm2	G-protein signalling modulator 2 (AGS3-like, C. elegans) [Source:ZFIN;Acc:ZDB-GENE-040426-1169]
comp34838_c0_seq2	0.182018	ENSDARG00000017311	1.85543	0.891752	4.9365	25.8048	3.77744e-07	1.38776e-06	2	45546372	45566044	gpsm2	G-protein signalling modulator 2 (AGS3-like, C. elegans) [Source:ZFIN;Acc:ZDB-GENE-040426-1169]
comp45633_c0_seq1	0.639177	ENSDARG00000017311	1.85543	0.891752	4.9365	25.8048	3.77744e-07	1.38776e-06	2	45546372	45566044	gpsm2	G-protein signalling modulator 2 (AGS3-like, C. elegans) [Source:ZFIN;Acc:ZDB-GENE-040426-1169]
comp29854_c0_seq1	1.33805	ENSDARG00000017315	1.61989	0.695899	4.80214	35.0713	3.17844e-09	1.53585e-08	7	60051454	60065244	larp7	La ribonucleoprotein domain family, member 7 [Source:ZFIN;Acc:ZDB-GENE-030131-6896]
comp15365_c0_seq1	1.22584	ENSDARG00000017397	2.11313	1.07938	6.02771	54.0722	1.9325e-13	1.4883e-12	16	45194689	45232422	smarcc1a	SWI/SNF related, matrix associated, actin dependent regulator of chromatin, subfamily c, member 1a [Source:ZFIN;Acc:ZDB-GENE-080514-3]
comp9667_c0_seq1	0.517372	ENSDARG00000017454	1.9081	0.932139	5.58348	40.7275	1.7501e-10	9.7648e-10	4	60246098	60264839	nup50	nucleoporin 50 [Source:ZFIN;Acc:ZDB-GENE-030131-1689]
comp36229_c0_seq1	0.0453927	ENSDARG00000017473	1.68653	0.754058	1.33375	8.28197	0.00400407	0.00761078	8	8356253	8391380	fgd1	FYVE, RhoGEF and PH domain containing 1 [Source:ZFIN;Acc:ZDB-GENE-081104-33]
comp36229_c0_seq1	0.0453927	ENSDARG00000017473	1.68653	0.754058	1.33375	8.28197	0.00400407	0.00761078	8	8356253	8391380	fgd1	FYVE, RhoGEF and PH domain containing 1 [Source:ZFIN;Acc:ZDB-GENE-081104-33]
comp36810_c0_seq1	9.02626	ENSDARG00000017473	1.68653	0.754058	1.33375	8.28197	0.00400407	0.00761078	8	8356253	8391380	fgd1	FYVE, RhoGEF and PH domain containing 1 [Source:ZFIN;Acc:ZDB-GENE-081104-33]
comp16165_c0_seq1	0.133558	ENSDARG00000017500	1.34814	0.430969	4.78833	11.9805	0.00053761	0.00119734	13	33038843	33122924	rock2a	rho-associated, coiled-coil containing protein kinase 2a [Source:ZFIN;Acc:ZDB-GENE-030115-3]
comp26665_c0_seq1	1.28546	ENSDARG00000017591	2.53971	1.34466	6.13577	66.5887	3.3449e-16	3.3412e-15	1	16118817	16266817	fat1a	FAT tumor suppressor homolog 1a [Source:ZFIN;Acc:ZDB-GENE-050425-1]
comp39843_c0_seq2	1.04651	ENSDARG00000017591	2.53971	1.34466	6.13577	66.5887	3.3449e-16	3.3412e-15	1	16118817	16266817	fat1a	FAT tumor suppressor homolog 1a [Source:ZFIN;Acc:ZDB-GENE-050425-1]
comp39843_c0_seq2	1.04651	ENSDARG00000017591	2.53971	1.34466	6.13577	66.5887	3.3449e-16	3.3412e-15	1	16118817	16266817	fat1a	FAT tumor suppressor homolog 1a [Source:ZFIN;Acc:ZDB-GENE-050425-1]
comp43736_c0_seq1	1.01895	ENSDARG00000017591	2.53971	1.34466	6.13577	66.5887	3.3449e-16	3.3412e-15	1	16118817	16266817	fat1a	FAT tumor suppressor homolog 1a [Source:ZFIN;Acc:ZDB-GENE-050425-1]
comp20727_c0_seq2	0.617017	ENSDARG00000017605	1.33375	0.415494	2.68545	6.51127	0.0107193	0.0187884	2	24243923	24251106	rpp40	ribonuclease P 40 subunit [Source:ZFIN;Acc:ZDB-GENE-040625-161]
comp16725_c0_seq1	0.688413	ENSDARG00000017696	1.63474	0.709061	4.85765	36.0781	1.89567e-09	9.42883e-09	13	32148856	32162114	diexf	digestive organ expansion factor homolog [Source:ZFIN;Acc:ZDB-GENE-021217-2]
comp42402_c0_seq1	1.17232	ENSDARG00000017696	1.63474	0.709061	4.85765	36.0781	1.89567e-09	9.42883e-09	13	32148856	32162114	diexf	digestive organ expansion factor homolog [Source:ZFIN;Acc:ZDB-GENE-021217-2]
comp40418_c0_seq1	0.191563	ENSDARG00000017740	1.54622	0.628748	6.19388	31.9523	1.58009e-08	6.96958e-08	20	32540629	32560854	sec63	SEC63-like (S. cerevisiae) [Source:ZFIN;Acc:ZDB-GENE-040718-328]
comp39311_c0_seq1	3.27611	ENSDARG00000017744	2.90328	1.53769	5.63576	90.5608	1.7938e-21	2.8848e-20	1	18277015	18304105	smc2	structural maintenance of chromosomes 2 [Source:ZFIN;Acc:ZDB-GENE-030131-105]
comp66489_c0_seq1	1.92907	ENSDARG00000017744	2.90328	1.53769	5.63576	90.5608	1.7938e-21	2.8848e-20	1	18277015	18304105	smc2	structural maintenance of chromosomes 2 [Source:ZFIN;Acc:ZDB-GENE-030131-105]
comp81465_c0_seq1	0.899575	ENSDARG00000017744	2.90328	1.53769	5.63576	90.5608	1.7938e-21	2.8848e-20	1	18277015	18304105	smc2	structural maintenance of chromosomes 2 [Source:ZFIN;Acc:ZDB-GENE-030131-105]
comp25754_c0_seq1	0.278887	ENSDARG00000017794	2.21525	1.14747	4.87296	80.6696	2.6679e-19	3.5249e-18	7	59944669	59965748	sdr16c5b	short chain dehydrogenase/reductase family 16C, member 5b [Source:ZFIN;Acc:ZDB-GENE-040426-2861]
comp37575_c0_seq1	0.792824	ENSDARG00000017794	2.21525	1.14747	4.87296	80.6696	2.6679e-19	3.5249e-18	7	59944669	59965748	sdr16c5b	short chain dehydrogenase/reductase family 16C, member 5b [Source:ZFIN;Acc:ZDB-GENE-040426-2861]
comp15385_c0_seq1	7.82476	ENSDARG00000017803	2.37367	1.24712	5.64904	59.7936	1.0535e-14	9.1109e-14	9	9799155	9892656	gsk3b	glycogen synthase kinase 3 beta [Source:ZFIN;Acc:ZDB-GENE-990714-4]
comp15385_c0_seq3	8.14541	ENSDARG00000017803	2.37367	1.24712	5.64904	59.7936	1.0535e-14	9.1109e-14	9	9799155	9892656	gsk3b	glycogen synthase kinase 3 beta [Source:ZFIN;Acc:ZDB-GENE-990714-4]
comp15385_c0_seq4	1.70756	ENSDARG00000017803	2.37367	1.24712	5.64904	59.7936	1.0535e-14	9.1109e-14	9	9799155	9892656	gsk3b	glycogen synthase kinase 3 beta [Source:ZFIN;Acc:ZDB-GENE-990714-4]
comp16210_c0_seq1	0.146059	ENSDARG00000017803	2.37367	1.24712	5.64904	59.7936	1.0535e-14	9.1109e-14	9	9799155	9892656	gsk3b	glycogen synthase kinase 3 beta [Source:ZFIN;Acc:ZDB-GENE-990714-4]
comp40354_c0_seq1	0.641691	ENSDARG00000017809	1.22326	0.290726	4.46455	6.79513	0.00914068	0.0162363	19	5593150	5610199	stard3	START domain containing 3 [Source:ZFIN;Acc:ZDB-GENE-001120-2]
comp40354_c0_seq1	0.641691	ENSDARG00000017809	1.22326	0.290726	4.46455	6.79513	0.00914068	0.0162363	19	5593150	5610199	stard3	START domain containing 3 [Source:ZFIN;Acc:ZDB-GENE-001120-2]
comp62630_c0_seq1	2.30146	ENSDARG00000017891	1.43169	0.517716	7.51113	17.8924	2.33753e-05	6.593e-05	23	2435272	2457630	tcp1	t-complex polypeptide 1 [Source:ZFIN;Acc:ZDB-GENE-990714-24]
comp66945_c0_seq1	1.03502	ENSDARG00000017891	1.43169	0.517716	7.51113	17.8924	2.33753e-05	6.593e-05	23	2435272	2457630	tcp1	t-complex polypeptide 1 [Source:ZFIN;Acc:ZDB-GENE-990714-24]
comp71253_c0_seq1	0.864196	ENSDARG00000017891	1.43169	0.517716	7.51113	17.8924	2.33753e-05	6.593e-05	23	2435272	2457630	tcp1	t-complex polypeptide 1 [Source:ZFIN;Acc:ZDB-GENE-990714-24]
comp30490_c0_seq1	0.820645	ENSDARG00000018020	1.20529	0.269377	5.39253	5.44158	0.0196629	0.0325908	18	1091983	1188044	pepd	peptidase D [Source:ZFIN;Acc:ZDB-GENE-030131-9444]
comp24624_c0_seq1	0.483193	ENSDARG00000018022	1.31218	0.391961	4.9418	11.0869	0.00086939	0.00186214	12	26412446	26434837	msh2	mutS homolog 2 (E. coli) [Source:ZFIN;Acc:ZDB-GENE-040426-2932]
comp34434_c0_seq1	0.251312	ENSDARG00000018049	1.54804	0.630444	6.3408	23.5187	1.23707e-06	4.23115e-06	7	7561474	7605901	sf3b2	splicing factor 3b, subunit 2 [Source:ZFIN;Acc:ZDB-GENE-070928-1]
comp34783_c0_seq1	0.719493	ENSDARG00000018121	1.95711	0.968724	2.3408	27.2511	1.78673e-07	6.87402e-07	9	30605117	30613216	cenpj	centromere protein J [Source:ZFIN;Acc:ZDB-GENE-030131-6323]
comp18516_c0_seq1	8.01161	ENSDARG00000018165	3.43913	1.78205	2.8231	71.3806	2.9456e-17	3.2255e-16	8	17232216	17244973	depdc1a	DEP domain containing 1a [Source:ZFIN;Acc:ZDB-GENE-030131-9827]
comp48551_c0_seq1	2.21974	ENSDARG00000018165	3.43913	1.78205	2.8231	71.3806	2.9456e-17	3.2255e-16	8	17232216	17244973	depdc1a	DEP domain containing 1a [Source:ZFIN;Acc:ZDB-GENE-030131-9827]
comp52342_c0_seq1	5.67693	ENSDARG00000018165	3.43913	1.78205	2.8231	71.3806	2.9456e-17	3.2255e-16	8	17232216	17244973	depdc1a	DEP domain containing 1a [Source:ZFIN;Acc:ZDB-GENE-030131-9827]
comp5919_c0_seq1	8.01161	ENSDARG00000018165	3.43913	1.78205	2.8231	71.3806	2.9456e-17	3.2255e-16	8	17232216	17244973	depdc1a	DEP domain containing 1a [Source:ZFIN;Acc:ZDB-GENE-030131-9827]
comp60679_c0_seq1	1.31408	ENSDARG00000018165	3.43913	1.78205	2.8231	71.3806	2.9456e-17	3.2255e-16	8	17232216	17244973	depdc1a	DEP domain containing 1a [Source:ZFIN;Acc:ZDB-GENE-030131-9827]
comp66492_c0_seq1	1.11407	ENSDARG00000018165	3.43913	1.78205	2.8231	71.3806	2.9456e-17	3.2255e-16	8	17232216	17244973	depdc1a	DEP domain containing 1a [Source:ZFIN;Acc:ZDB-GENE-030131-9827]
comp77422_c0_seq1	2.86195	ENSDARG00000018165	3.43913	1.78205	2.8231	71.3806	2.9456e-17	3.2255e-16	8	17232216	17244973	depdc1a	DEP domain containing 1a [Source:ZFIN;Acc:ZDB-GENE-030131-9827]
comp41732_c0_seq1	0.129811	ENSDARG00000018178	1.30145	0.380121	4.9718	6.66047	0.00985749	0.0174057	1	17521063	17545814	pgm2	phosphoglucomutase 2 [Source:ZFIN;Acc:ZDB-GENE-040426-2218]
comp37755_c0_seq2	12.6627	ENSDARG00000018192	1.94797	0.961969	6.27089	37.2215	1.05446e-09	5.41147e-09	16	56147791	56252683	ubr5	ubiquitin protein ligase E3 component n-recognin 5 [Source:ZFIN;Acc:ZDB-GENE-030131-6559]
comp33824_c0_seq1	0.823466	ENSDARG00000018272	1.36906	0.453186	5.30639	14.5517	0.00013636	0.00033755	2	5052822	5086135	wdr33	WD repeat domain 33 [Source:ZFIN;Acc:ZDB-GENE-040924-3]
comp39712_c0_seq1	0.931191	ENSDARG00000018303	13.7157	3.77776	5.9196	536.409	1.139e-118	9.657e-116	12	29107126	29139725	etv4	ets variant gene 4 [Source:ZFIN;Acc:ZDB-GENE-990415-71]
comp16129_c0_seq1	0.579494	ENSDARG00000018325	1.75607	0.812349	4.03701	35.0234	3.2577e-09	1.57236e-08	1	49921680	49938546	taf5	TAF5 RNA polymerase II, TATA box binding protein (TBP)-associated factor [Source:ZFIN;Acc:ZDB-GENE-051120-180]
comp29441_c0_seq1	0.964145	ENSDARG00000018425	1.18668	0.246929	7.33325	4.83764	0.027845	0.0446378	16	27912391	27938835	si:ch211-175g6.7	si:ch211-175g6.7 [Source:ZFIN;Acc:ZDB-GENE-030131-6611]
comp29441_c0_seq1	0.964145	ENSDARG00000018425	1.18668	0.246929	7.33325	4.83764	0.027845	0.0446378	16	27912391	27938835	si:ch211-175g6.7	si:ch211-175g6.7 [Source:ZFIN;Acc:ZDB-GENE-030131-6611]
comp15873_c0_seq1	9.20549	ENSDARG00000018434	1.53128	0.614741	5.50551	19.6767	9.1712e-06	2.7423e-05	21	44180627	44199653	larp1	La ribonucleoprotein domain family, member 1 [Source:ZFIN;Acc:ZDB-GENE-030131-5386]
comp15873_c0_seq1	9.20549	ENSDARG00000018434	1.53128	0.614741	5.50551	19.6767	9.1712e-06	2.7423e-05	21	44180627	44199653	larp1	La ribonucleoprotein domain family, member 1 [Source:ZFIN;Acc:ZDB-GENE-030131-5386]
comp15873_c0_seq2	0.501789	ENSDARG00000018434	1.53128	0.614741	5.50551	19.6767	9.1712e-06	2.7423e-05	21	44180627	44199653	larp1	La ribonucleoprotein domain family, member 1 [Source:ZFIN;Acc:ZDB-GENE-030131-5386]
comp15873_c0_seq2	0.501789	ENSDARG00000018434	1.53128	0.614741	5.50551	19.6767	9.1712e-06	2.7423e-05	21	44180627	44199653	larp1	La ribonucleoprotein domain family, member 1 [Source:ZFIN;Acc:ZDB-GENE-030131-5386]
comp41238_c0_seq3	0.986407	ENSDARG00000018476	2.12583	1.08802	5.39748	84.7211	3.4356e-20	4.9354e-19	22	2139917	2171800	pak2b	p21 (CDKN1A)-activated kinase 2b [Source:ZFIN;Acc:ZDB-GENE-030131-3759]
comp40322_c0_seq4	0.693343	ENSDARG00000018508	2.6196	1.38935	2.53255	47.5924	5.2472e-12	3.4582e-11	5	19701184	19827187	zdhhc8b	zinc finger, DHHC-type containing 8b [Source:ZFIN;Acc:ZDB-GENE-030407-3]
comp40322_c0_seq4	0.693343	ENSDARG00000018508	2.6196	1.38935	2.53255	47.5924	5.2472e-12	3.4582e-11	5	19701184	19827187	zdhhc8b	zinc finger, DHHC-type containing 8b [Source:ZFIN;Acc:ZDB-GENE-030407-3]
comp40322_c0_seq4	0.693343	ENSDARG00000018508	2.6196	1.38935	2.53255	47.5924	5.2472e-12	3.4582e-11	5	19701184	19827187	zdhhc8b	zinc finger, DHHC-type containing 8b [Source:ZFIN;Acc:ZDB-GENE-030407-3]
comp40322_c0_seq8	4.70486	ENSDARG00000018508	2.6196	1.38935	2.53255	47.5924	5.2472e-12	3.4582e-11	5	19701184	19827187	zdhhc8b	zinc finger, DHHC-type containing 8b [Source:ZFIN;Acc:ZDB-GENE-030407-3]
comp40322_c0_seq8	4.70486	ENSDARG00000018508	2.6196	1.38935	2.53255	47.5924	5.2472e-12	3.4582e-11	5	19701184	19827187	zdhhc8b	zinc finger, DHHC-type containing 8b [Source:ZFIN;Acc:ZDB-GENE-030407-3]
comp32398_c0_seq1	0.56638	ENSDARG00000018524	2.35641	1.23659	7.50555	18.2423	1.945e-05	5.54785e-05	22	18949188	18970595	midn	midnolin [Source:ZFIN;Acc:ZDB-GENE-030131-2433]
comp26167_c0_seq1	0.388594	ENSDARG00000018562	1.4195	0.505378	7.16064	16.537	4.771e-05	0.00012728	2	9297672	9309055	cope	coatomer protein complex, subunit epsilon [Source:ZFIN;Acc:ZDB-GENE-041114-59]
comp28868_c0_seq1	0.561921	ENSDARG00000018618	1.4208	0.506701	5.77201	18.1184	2.07589e-05	5.90144e-05	4	1906112	1920282	cpsf6	cleavage and polyadenylation specific factor 6 [Source:ZFIN;Acc:ZDB-GENE-030131-5277]
comp32152_c0_seq1	1.4851	ENSDARG00000018623	2.67055	1.41713	2.88425	53.6835	2.3554e-13	1.7976e-12	6	3280974	3298674	rad54l	RAD54-like (S. cerevisiae) [Source:ZFIN;Acc:ZDB-GENE-040426-968]
comp11513_c0_seq1	0.766375	ENSDARG00000018681	1.28312	0.359656	3.56063	6.61819	0.0100943	0.0177756	25	8444015	8465457	saal1	serum amyloid A-like 1 [Source:ZFIN;Acc:ZDB-GENE-040426-725]
comp35164_c0_seq1	1.04221	ENSDARG00000018698	1.63744	0.71144	5.79498	31.5253	1.9686e-08	8.57172e-08	3	34234633	34257510	carm1	coactivator-associated arginine methyltransferase 1 [Source:ZFIN;Acc:ZDB-GENE-040724-77]
comp35164_c0_seq3	1.01887	ENSDARG00000018698	1.63744	0.71144	5.79498	31.5253	1.9686e-08	8.57172e-08	3	34234633	34257510	carm1	coactivator-associated arginine methyltransferase 1 [Source:ZFIN;Acc:ZDB-GENE-040724-77]
comp17086_c0_seq1	0.403993	ENSDARG00000018716	1.61048	0.687491	1.83713	14.6194	0.00013156	0.00032655	9	18302283	18476807	dgkh	diacylglycerol kinase, eta [Source:ZFIN;Acc:ZDB-GENE-070912-328]
comp4492_c0_seq1	0.470499	ENSDARG00000018716	1.61048	0.687491	1.83713	14.6194	0.00013156	0.00032655	9	18302283	18476807	dgkh	diacylglycerol kinase, eta [Source:ZFIN;Acc:ZDB-GENE-070912-328]
comp38699_c0_seq2	9.45786	ENSDARG00000018721	1.80325	0.850603	3.34643	14.6131	0.000132	0.0003275	1	50592523	50695089	npnt	nephronectin [Source:ZFIN;Acc:ZDB-GENE-090312-201]
comp38699_c0_seq2	9.45786	ENSDARG00000018721	1.80325	0.850603	3.34643	14.6131	0.000132	0.0003275	1	50592523	50695089	npnt	nephronectin [Source:ZFIN;Acc:ZDB-GENE-090312-201]
comp25769_c0_seq1	0.5014	ENSDARG00000018742	1.32316	0.403987	5.13639	14.0901	0.00017425	0.00042307	12	25501381	25563184	psme4b	proteasome (prosome, macropain) activator subunit 4b [Source:ZFIN;Acc:ZDB-GENE-100316-4]
comp25769_c0_seq2	0.579737	ENSDARG00000018742	1.32316	0.403987	5.13639	14.0901	0.00017425	0.00042307	12	25501381	25563184	psme4b	proteasome (prosome, macropain) activator subunit 4b [Source:ZFIN;Acc:ZDB-GENE-100316-4]
comp6642_c0_seq1	0.631004	ENSDARG00000018742	1.32316	0.403987	5.13639	14.0901	0.00017425	0.00042307	12	25501381	25563184	psme4b	proteasome (prosome, macropain) activator subunit 4b [Source:ZFIN;Acc:ZDB-GENE-100316-4]
comp24932_c0_seq1	0.11178	ENSDARG00000018745	1.51061	0.595134	4.10224	16.036	6.215e-05	0.00016265	1	27071903	27255466	psip1	PC4 and SFRS1 interacting protein 1 [Source:ZFIN;Acc:ZDB-GENE-050522-104]
comp40531_c0_seq1	2.05649	ENSDARG00000018806	1.44562	0.531686	7.57965	10.519	0.00118156	0.00247726	15	42362040	42383557	ctsc	cathepsin C [Source:ZFIN;Acc:ZDB-GENE-030619-9]
comp15414_c0_seq1	0.783856	ENSDARG00000018889	1.40138	0.486845	4.58306	15.3792	8.795e-05	0.00022466	6	4243839	4275557	RBM26	RNA binding motif protein 26 [Source:HGNC Symbol;Acc:HGNC:20327]
comp16491_c0_seq1	0.389427	ENSDARG00000018889	1.40138	0.486845	4.58306	15.3792	8.795e-05	0.00022466	6	4243839	4275557	RBM26	RNA binding motif protein 26 [Source:HGNC Symbol;Acc:HGNC:20327]
comp11028_c0_seq1	0.754207	ENSDARG00000018890	1.39148	0.47662	5.88577	20.8612	4.938e-06	1.5435e-05	18	33747015	33752102	snrpa	small nuclear ribonucleoprotein polypeptide A [Source:ZFIN;Acc:ZDB-GENE-030131-2841]
comp29371_c0_seq1	0.0245774	ENSDARG00000018936	1.26617	0.340466	4.69199	7.18166	0.00736526	0.0132973	19	44599863	44607251	zcchc17	zinc finger, CCHC domain containing 17 [Source:ZFIN;Acc:ZDB-GENE-040325-2]
comp16093_c0_seq1	0.933665	ENSDARG00000018973	1.44545	0.531515	5.35997	18.3499	1.83826e-05	5.26624e-05	15	16093200	16114670	clptm1	cleft lip and palate associated transmembrane protein 1 [Source:ZFIN;Acc:ZDB-GENE-040801-265]
comp41518_c0_seq1	0.366736	ENSDARG00000018989	1.30822	0.387603	7.33451	11.5338	0.0006834	0.00149341	14	24591915	24612390	hspa4b	heat shock protein 4b [Source:ZFIN;Acc:ZDB-GENE-030131-6018]
comp26925_c0_seq1	0.2456	ENSDARG00000019004	1.68756	0.754939	5.31945	37.101	1.12166e-09	5.73377e-09	22	6955888	6972219	smarcd1	SWI/SNF related, matrix associated, actin dependent regulator of chromatin, subfamily d, member 1 [Source:ZFIN;Acc:ZDB-GENE-030131-1835]
comp38066_c0_seq1	0.650348	ENSDARG00000019137	2.15367	1.1068	6.69416	63.0243	2.0418e-15	1.8882e-14	24	14118964	14138957	tram1	translocating chain-associating membrane protein 1 [Source:ZFIN;Acc:ZDB-GENE-021011-1]
comp28710_c0_seq1	0.278455	ENSDARG00000019156	1.65966	0.73089	3.06559	16.0298	6.23546e-05	0.00016314	8	21433919	21452847	haus5	HAUS augmin-like complex, subunit 5 [Source:ZFIN;Acc:ZDB-GENE-041114-150]
comp35764_c0_seq1	1.27036	ENSDARG00000019236	1.41638	0.502213	4.761	16.1896	5.73089e-05	0.00015082	14	40349421	40369597	gsr	glutathione reductase [Source:ZFIN;Acc:ZDB-GENE-050522-116]
comp35764_c0_seq1	1.27036	ENSDARG00000019236	1.41638	0.502213	4.761	16.1896	5.73089e-05	0.00015082	14	40349421	40369597	gsr	glutathione reductase [Source:ZFIN;Acc:ZDB-GENE-050522-116]
comp40987_c0_seq1	8.70541	ENSDARG00000019239	1.33659	0.418557	5.62273	10.2249	0.00138555	0.00287085	2	50799421	50842315	cul1a	cullin 1a [Source:ZFIN;Acc:ZDB-GENE-030131-2603]
comp40987_c0_seq2	9.96278	ENSDARG00000019239	1.33659	0.418557	5.62273	10.2249	0.00138555	0.00287085	2	50799421	50842315	cul1a	cullin 1a [Source:ZFIN;Acc:ZDB-GENE-030131-2603]
comp40987_c0_seq3	9.66146	ENSDARG00000019239	1.33659	0.418557	5.62273	10.2249	0.00138555	0.00287085	2	50799421	50842315	cul1a	cullin 1a [Source:ZFIN;Acc:ZDB-GENE-030131-2603]
comp30801_c0_seq1	0.754982	ENSDARG00000019258	1.64417	0.717363	5.20289	32.8631	9.88803e-09	4.47443e-08	19	35252263	35426739	elmo1	engulfment and cell motility 1 (ced-12 homolog, C. elegans) [Source:ZFIN;Acc:ZDB-GENE-040426-2069]
comp58818_c0_seq1	1.30471	ENSDARG00000019258	1.64417	0.717363	5.20289	32.8631	9.88803e-09	4.47443e-08	19	35252263	35426739	elmo1	engulfment and cell motility 1 (ced-12 homolog, C. elegans) [Source:ZFIN;Acc:ZDB-GENE-040426-2069]
comp66865_c0_seq1	5.01568	ENSDARG00000019258	1.64417	0.717363	5.20289	32.8631	9.88803e-09	4.47443e-08	19	35252263	35426739	elmo1	engulfment and cell motility 1 (ced-12 homolog, C. elegans) [Source:ZFIN;Acc:ZDB-GENE-040426-2069]
comp41810_c0_seq1	0.141271	ENSDARG00000019280	1.61343	0.690129	5.61145	24.1681	8.82847e-07	3.07798e-06	21	39677160	39718803	larsb	leucyl-tRNA synthetase b [Source:ZFIN;Acc:ZDB-GENE-030114-7]
comp24507_c0_seq1	1.3827	ENSDARG00000019293	1.27854	0.354493	5.17874	8.63757	0.00329301	0.00635544	9	35922246	35939949	tfdp1a	transcription factor Dp-1, a [Source:ZFIN;Acc:ZDB-GENE-040426-2883]
comp31344_c0_seq1	0.184622	ENSDARG00000019341	1.84697	0.885159	2.96741	12.5185	0.00040295	0.00092128	22	15652826	15693809	gpc1a	glypican 1a [Source:ZFIN;Acc:ZDB-GENE-051120-147]
comp31344_c0_seq1	0.184622	ENSDARG00000019341	1.84697	0.885159	2.96741	12.5185	0.00040295	0.00092128	22	15652826	15693809	gpc1a	glypican 1a [Source:ZFIN;Acc:ZDB-GENE-051120-147]
comp39672_c0_seq10	9.5452	ENSDARG00000019426	1.66396	0.734616	3.16708	15.1752	9.79817e-05	0.00024852	19	43376996	43581185	trioa	trio Rho guanine nucleotide exchange factor a [Source:ZFIN;Acc:ZDB-GENE-060503-334]
comp39672_c0_seq11	9.37854	ENSDARG00000019426	1.66396	0.734616	3.16708	15.1752	9.79817e-05	0.00024852	19	43376996	43581185	trioa	trio Rho guanine nucleotide exchange factor a [Source:ZFIN;Acc:ZDB-GENE-060503-334]
comp39672_c0_seq9	9.12677	ENSDARG00000019426	1.66396	0.734616	3.16708	15.1752	9.79817e-05	0.00024852	19	43376996	43581185	trioa	trio Rho guanine nucleotide exchange factor a [Source:ZFIN;Acc:ZDB-GENE-060503-334]
comp37733_c0_seq1	0.0231362	ENSDARG00000019507	1.67207	0.741631	5.98942	21.3775	3.77162e-06	1.204e-05	3	27023667	27035630	mcm5	MCM5 minichromosome maintenance deficient 5 (S. cerevisiae) [Source:ZFIN;Acc:ZDB-GENE-021209-1]
comp36600_c0_seq1	1.19127	ENSDARG00000019529	1.39923	0.484634	5.15781	13.0674	0.00030048	0.00070186	20	43680201	43721542	parp1	poly (ADP-ribose) polymerase family, member 1 [Source:ZFIN;Acc:ZDB-GENE-030131-3955]
comp32549_c0_seq1	0.251773	ENSDARG00000019530	1.52151	0.605503	5.33963	23.3338	1.36184e-06	4.62709e-06	22	22597221	22622680	hdgfrp2	hepatoma-derived growth factor, related protein 2 [Source:ZFIN;Acc:ZDB-GENE-040426-2104]
comp32549_c0_seq2	0.131511	ENSDARG00000019530	1.52151	0.605503	5.33963	23.3338	1.36184e-06	4.62709e-06	22	22597221	22622680	hdgfrp2	hepatoma-derived growth factor, related protein 2 [Source:ZFIN;Acc:ZDB-GENE-040426-2104]
comp35190_c0_seq1	0.872264	ENSDARG00000019530	1.52151	0.605503	5.33963	23.3338	1.36184e-06	4.62709e-06	22	22597221	22622680	hdgfrp2	hepatoma-derived growth factor, related protein 2 [Source:ZFIN;Acc:ZDB-GENE-040426-2104]
comp30297_c0_seq1	0.850753	ENSDARG00000019588	2.62772	1.39381	0.219543	13.9715	0.00018561	0.00044843	2	53035303	53084360	chico	chico [Source:ZFIN;Acc:ZDB-GENE-000210-28]
comp30354_c0_seq2	0.0472576	ENSDARG00000019596	1.61904	0.695134	5.16135	34.0046	5.49818e-09	2.57169e-08	2	36549076	36575333	NRD1 (1 of 2)	nardilysin (N-arginine dibasic convertase) [Source:HGNC Symbol;Acc:HGNC:7995]
comp35952_c0_seq2	0.876507	ENSDARG00000019601	4.36804	2.12698	8.51463	166.017	5.4856e-38	2.672e-36	20	49761926	49993603	col12a1b	collagen, type XII, alpha 1b [Source:ZFIN;Acc:ZDB-GENE-120215-116]
comp35952_c0_seq2	0.876507	ENSDARG00000019601	4.36804	2.12698	8.51463	166.017	5.4856e-38	2.672e-36	20	49761926	49993603	col12a1b	collagen, type XII, alpha 1b [Source:ZFIN;Acc:ZDB-GENE-120215-116]
comp35952_c0_seq3	3.39677	ENSDARG00000019601	4.36804	2.12698	8.51463	166.017	5.4856e-38	2.672e-36	20	49761926	49993603	col12a1b	collagen, type XII, alpha 1b [Source:ZFIN;Acc:ZDB-GENE-120215-116]
comp35952_c0_seq4	2.08272	ENSDARG00000019601	4.36804	2.12698	8.51463	166.017	5.4856e-38	2.672e-36	20	49761926	49993603	col12a1b	collagen, type XII, alpha 1b [Source:ZFIN;Acc:ZDB-GENE-120215-116]
comp7485_c0_seq1	0.625351	ENSDARG00000019614	1.27692	0.352664	3.71656	6.92816	0.00848488	0.0151525	6	37427113	37461481	jade3	jade family PHD finger 3 [Source:ZFIN;Acc:ZDB-GENE-030131-928]
comp16484_c0_seq1	2.70382	ENSDARG00000019763	5.29717	2.40522	5.44349	66.927	2.8176e-16	2.8361e-15	6	9433685	9441079	acp5a	acid phosphatase 5a, tartrate resistant [Source:ZFIN;Acc:ZDB-GENE-040426-2864]
comp16484_c0_seq1	2.70382	ENSDARG00000019763	5.29717	2.40522	5.44349	66.927	2.8176e-16	2.8361e-15	6	9433685	9441079	acp5a	acid phosphatase 5a, tartrate resistant [Source:ZFIN;Acc:ZDB-GENE-040426-2864]
comp16484_c0_seq2	4.38431	ENSDARG00000019763	5.29717	2.40522	5.44349	66.927	2.8176e-16	2.8361e-15	6	9433685	9441079	acp5a	acid phosphatase 5a, tartrate resistant [Source:ZFIN;Acc:ZDB-GENE-040426-2864]
comp16484_c0_seq2	4.38431	ENSDARG00000019763	5.29717	2.40522	5.44349	66.927	2.8176e-16	2.8361e-15	6	9433685	9441079	acp5a	acid phosphatase 5a, tartrate resistant [Source:ZFIN;Acc:ZDB-GENE-040426-2864]
comp41991_c0_seq1	0.272507	ENSDARG00000019797	1.53536	0.618581	4.77084	23.7888	1.07504e-06	3.70387e-06	11	18496932	18519787	qrich1	glutamine-rich 1 [Source:ZFIN;Acc:ZDB-GENE-030131-8204]
comp37412_c0_seq1	1.387	ENSDARG00000019815	8.59161	3.10293	8.08541	279.349	1.0409e-62	1.4116e-60	9	15638532	15700871	fn1a	fibronectin 1a [Source:ZFIN;Acc:ZDB-GENE-000426-1]
comp37412_c0_seq4	2.12898	ENSDARG00000019815	8.59161	3.10293	8.08541	279.349	1.0409e-62	1.4116e-60	9	15638532	15700871	fn1a	fibronectin 1a [Source:ZFIN;Acc:ZDB-GENE-000426-1]
comp11425_c0_seq1	1.66573	ENSDARG00000019838	3.28195	1.71456	5.16642	128.98	6.8505e-30	2.0923e-28	1	22057626	22068847	ugdh	UDP-glucose dehydrogenase [Source:ZFIN;Acc:ZDB-GENE-011022-1]
comp15282_c0_seq1	0.470389	ENSDARG00000019924	1.33517	0.417019	7.34618	12.1619	0.00048776	0.00109727	2	9852644	9865826	cmpk	cytidylate kinase [Source:ZFIN;Acc:ZDB-GENE-040426-2113]
comp40776_c1_seq4	0.998468	ENSDARG00000019949	6.3385	2.66414	8.58136	92.6005	6.399e-22	1.0672e-20	15	28732298	28736597	serpinh1b	serpin peptidase inhibitor, clade H (heat shock protein 47), member 1b [Source:ZFIN;Acc:ZDB-GENE-990415-93]
comp80590_c0_seq1	1.31408	ENSDARG00000019949	6.3385	2.66414	8.58136	92.6005	6.399e-22	1.0672e-20	15	28732298	28736597	serpinh1b	serpin peptidase inhibitor, clade H (heat shock protein 47), member 1b [Source:ZFIN;Acc:ZDB-GENE-990415-93]
comp37323_c0_seq1	0.763162	ENSDARG00000019969	2.87766	1.5249	1.7112	39.4469	3.3711e-10	1.82625e-09	7	44168385	44198569	smarcd3b	SWI/SNF related, matrix associated, actin dependent regulator of chromatin, subfamily d, member 3b [Source:ZFIN;Acc:ZDB-GENE-080509-2]
comp37323_c0_seq1	0.763162	ENSDARG00000019969	2.87766	1.5249	1.7112	39.4469	3.3711e-10	1.82625e-09	7	44168385	44198569	smarcd3b	SWI/SNF related, matrix associated, actin dependent regulator of chromatin, subfamily d, member 3b [Source:ZFIN;Acc:ZDB-GENE-080509-2]
comp37323_c0_seq4	0.328871	ENSDARG00000019969	2.87766	1.5249	1.7112	39.4469	3.3711e-10	1.82625e-09	7	44168385	44198569	smarcd3b	SWI/SNF related, matrix associated, actin dependent regulator of chromatin, subfamily d, member 3b [Source:ZFIN;Acc:ZDB-GENE-080509-2]
comp37323_c0_seq4	0.328871	ENSDARG00000019969	2.87766	1.5249	1.7112	39.4469	3.3711e-10	1.82625e-09	7	44168385	44198569	smarcd3b	SWI/SNF related, matrix associated, actin dependent regulator of chromatin, subfamily d, member 3b [Source:ZFIN;Acc:ZDB-GENE-080509-2]
comp30587_c0_seq1	0.819575	ENSDARG00000019998	1.41393	0.499707	5.75266	19.4467	1.03445e-05	3.07416e-05	22	16338200	16369810	slc30a7	solute carrier family 30 (zinc transporter), member 7 [Source:ZFIN;Acc:ZDB-GENE-030131-5650]
comp54050_c0_seq1	2.86195	ENSDARG00000020007	6.99334	2.80598	11.6872	186.72	1.6535e-42	1.0381e-40	19	41943847	41963606	col1a2	collagen, type I, alpha 2 [Source:ZFIN;Acc:ZDB-GENE-030131-8415]
comp34642_c0_seq1	0.72096	ENSDARG00000020008	1.78646	0.837101	8.98855	36.1516	1.82551e-09	9.10122e-09	5	43128969	43139562	vcp	valosin containing protein [Source:ZFIN;Acc:ZDB-GENE-030131-5408]
comp34642_c0_seq1	0.72096	ENSDARG00000020008	1.78646	0.837101	8.98855	36.1516	1.82551e-09	9.10122e-09	5	43128969	43139562	vcp	valosin containing protein [Source:ZFIN;Acc:ZDB-GENE-030131-5408]
comp31336_c0_seq1	0.396704	ENSDARG00000020039	7.34188	2.87615	2.23153	138.112	6.8868e-32	2.3922e-30	13	33919983	33925003	MAD2L1BP	MAD2L1 binding protein [Source:HGNC Symbol;Acc:HGNC:21059]
comp42095_c0_seq1	0.706309	ENSDARG00000020085	1.41642	0.502252	4.58058	17.5047	2.866e-05	7.93543e-05	18	32384324	32398337	slc33a1	solute carrier family 33 (acetyl-CoA transporter), member 1 [Source:ZFIN;Acc:ZDB-GENE-040426-1241]
comp40085_c0_seq1	1.98189	ENSDARG00000020128	7.32533	2.87289	0.79524	63.4734	1.6255e-15	1.5166e-14	2	53411307	53432629	RAB31	RAB31, member RAS oncogene family [Source:HGNC Symbol;Acc:HGNC:9771]
comp34084_c0_seq2	0.361463	ENSDARG00000020131	1.32738	0.408584	5.41087	11.9616	0.00054309	0.00120813	8	15503957	15597524	fnbp1l	formin binding protein 1-like [Source:ZFIN;Acc:ZDB-GENE-040801-155]
comp61099_c0_seq1	0.583298	ENSDARG00000020145	1.9721	0.979731	0.442306	12.8838	0.00033144	0.00076889	15	32140414	32171608	zgc:73340	zgc:73340 [Source:ZFIN;Acc:ZDB-GENE-030131-4851]
comp33677_c0_seq1	0.70541	ENSDARG00000020192	5.04459	2.33474	4.87674	167.78	2.2597e-38	1.1299e-36	2	19218016	19234798	cdc20	cell division cycle 20 homolog [Source:ZFIN;Acc:ZDB-GENE-040426-2044]
comp40763_c0_seq1	0.787191	ENSDARG00000020236	2.76156	1.46548	4.91719	123.163	1.2842e-28	3.5864e-27	18	15055073	15230530	PPFIBP1 (1 of 2)	PTPRF interacting protein, binding protein 1 (liprin beta 1) [Source:HGNC Symbol;Acc:HGNC:9249]
comp40763_c0_seq4	0.638658	ENSDARG00000020236	2.76156	1.46548	4.91719	123.163	1.2842e-28	3.5864e-27	18	15055073	15230530	PPFIBP1 (1 of 2)	PTPRF interacting protein, binding protein 1 (liprin beta 1) [Source:HGNC Symbol;Acc:HGNC:9249]
comp36794_c0_seq1	1.1845	ENSDARG00000020252	1.26716	0.341594	6.60092	6.82343	0.00899694	0.0159961	7	67917224	67938816	btbd10b	BTB (POZ) domain containing 10b [Source:ZFIN;Acc:ZDB-GENE-080104-5]
comp26146_c0_seq1	0.766894	ENSDARG00000020261	1.21645	0.282679	7.65391	6.61856	0.0100922	0.0177737	2	21618206	21644458	rab2a	RAB2A, member RAS oncogene family [Source:ZFIN;Acc:ZDB-GENE-011212-2]
comp32007_c0_seq1	0.181698	ENSDARG00000020289	6.49797	2.69999	1.65189	89.1371	3.6837e-21	5.787e-20	2	16918145	16936147	pif1	PIF1 5'-to-3' DNA helicase homolog (S. cerevisiae) [Source:ZFIN;Acc:ZDB-GENE-030131-4928]
comp33518_c0_seq1	2.74557	ENSDARG00000020289	6.49797	2.69999	1.65189	89.1371	3.6837e-21	5.787e-20	2	16918145	16936147	pif1	PIF1 5'-to-3' DNA helicase homolog (S. cerevisiae) [Source:ZFIN;Acc:ZDB-GENE-030131-4928]
comp36826_c0_seq1	0.0305687	ENSDARG00000020289	6.49797	2.69999	1.65189	89.1371	3.6837e-21	5.787e-20	2	16918145	16936147	pif1	PIF1 5'-to-3' DNA helicase homolog (S. cerevisiae) [Source:ZFIN;Acc:ZDB-GENE-030131-4928]
comp38741_c0_seq1	0.939656	ENSDARG00000020323	1.58649	0.665838	5.17282	27.3394	1.70694e-07	6.58349e-07	19	47866939	47906589	nup153	nucleoporin 153 [Source:ZFIN;Acc:ZDB-GENE-030131-4581]
comp42823_c0_seq1	0.986499	ENSDARG00000020371	1.85895	0.894485	2.98819	25.0852	5.48519e-07	1.97325e-06	12	3895083	3904611	g6pc3	glucose 6 phosphatase, catalytic, 3 [Source:ZFIN;Acc:ZDB-GENE-061215-19]
comp16405_c0_seq1	0.300362	ENSDARG00000020373	2.27414	1.18532	2.65731	45.8057	1.3058e-11	8.2718e-11	16	51653909	51907179	ext1a	exostoses (multiple) 1a [Source:ZFIN;Acc:ZDB-GENE-050211-3]
comp45407_c0_seq1	0.941784	ENSDARG00000020447	1.74556	0.803689	4.17225	37.1409	1.09896e-09	5.62793e-09	9	32531209	32558383	tmtc4	transmembrane and tetratricopeptide repeat containing 4 [Source:ZFIN;Acc:ZDB-GENE-070912-148]
comp45407_c0_seq1	0.941784	ENSDARG00000020447	1.74556	0.803689	4.17225	37.1409	1.09896e-09	5.62793e-09	9	32531209	32558383	tmtc4	transmembrane and tetratricopeptide repeat containing 4 [Source:ZFIN;Acc:ZDB-GENE-070912-148]
comp46364_c0_seq1	0.559497	ENSDARG00000020447	1.74556	0.803689	4.17225	37.1409	1.09896e-09	5.62793e-09	9	32531209	32558383	tmtc4	transmembrane and tetratricopeptide repeat containing 4 [Source:ZFIN;Acc:ZDB-GENE-070912-148]
comp49678_c0_seq1	2.02467	ENSDARG00000020447	1.74556	0.803689	4.17225	37.1409	1.09896e-09	5.62793e-09	9	32531209	32558383	tmtc4	transmembrane and tetratricopeptide repeat containing 4 [Source:ZFIN;Acc:ZDB-GENE-070912-148]
comp16243_c0_seq1	1.38864	ENSDARG00000020454	1.86382	0.89826	7.17637	31.8096	1.70051e-08	7.46966e-08	18	43032246	43040330	psmd8	proteasome (prosome, macropain) 26S subunit, non-ATPase, 8 [Source:ZFIN;Acc:ZDB-GENE-040625-136]
comp34463_c0_seq1	0.425566	ENSDARG00000020473	1.65554	0.727306	4.20364	22.17	2.49539e-06	8.15175e-06	7	51852844	51854956	hddc3	HD domain containing 3 [Source:ZFIN;Acc:ZDB-GENE-050417-377]
comp34463_c0_seq2	6.66276	ENSDARG00000020473	1.65554	0.727306	4.20364	22.17	2.49539e-06	8.15175e-06	7	51852844	51854956	hddc3	HD domain containing 3 [Source:ZFIN;Acc:ZDB-GENE-050417-377]
comp36877_c0_seq1	0.850579	ENSDARG00000020623	1.38725	0.472224	5.99195	12.3406	0.0004432	0.00100545	3	37771271	37780655	baxa	bcl2-associated X protein, a [Source:ZFIN;Acc:ZDB-GENE-000511-6]
comp36877_c0_seq1	0.850579	ENSDARG00000020623	1.38725	0.472224	5.99195	12.3406	0.0004432	0.00100545	3	37771271	37780655	baxa	bcl2-associated X protein, a [Source:ZFIN;Acc:ZDB-GENE-000511-6]
comp41106_c0_seq1	0.61958	ENSDARG00000020625	1.25236	0.324648	7.35601	6.03539	0.0140218	0.023948	6	31060241	31121331	jak1	Janus kinase 1 [Source:ZFIN;Acc:ZDB-GENE-980526-142]
comp41106_c0_seq2	9.09404	ENSDARG00000020625	1.25236	0.324648	7.35601	6.03539	0.0140218	0.023948	6	31060241	31121331	jak1	Janus kinase 1 [Source:ZFIN;Acc:ZDB-GENE-980526-142]
comp41106_c0_seq3	7.51435	ENSDARG00000020625	1.25236	0.324648	7.35601	6.03539	0.0140218	0.023948	6	31060241	31121331	jak1	Janus kinase 1 [Source:ZFIN;Acc:ZDB-GENE-980526-142]
comp41106_c0_seq4	11.282	ENSDARG00000020625	1.25236	0.324648	7.35601	6.03539	0.0140218	0.023948	6	31060241	31121331	jak1	Janus kinase 1 [Source:ZFIN;Acc:ZDB-GENE-980526-142]
comp41106_c0_seq5	12.1346	ENSDARG00000020625	1.25236	0.324648	7.35601	6.03539	0.0140218	0.023948	6	31060241	31121331	jak1	Janus kinase 1 [Source:ZFIN;Acc:ZDB-GENE-980526-142]
comp26736_c0_seq1	0.150079	ENSDARG00000020676	1.82154	0.865158	6.42107	50.7561	1.0459e-12	7.4303e-12	21	26730944	26749066	dpp3	dipeptidylpeptidase 3 [Source:ZFIN;Acc:ZDB-GENE-030131-1247]
comp26736_c0_seq1	0.150079	ENSDARG00000020676	1.82154	0.865158	6.42107	50.7561	1.0459e-12	7.4303e-12	21	26730944	26749066	dpp3	dipeptidylpeptidase 3 [Source:ZFIN;Acc:ZDB-GENE-030131-1247]
comp18298_c0_seq1	0.56615	ENSDARG00000020711	2.654	1.40817	5.41521	22.7265	1.86777e-06	6.21894e-06	20	29518377	29525282	rrm2	ribonucleotide reductase M2 polypeptide [Source:ZFIN;Acc:ZDB-GENE-990415-25]
comp39377_c0_seq1	1.62911	ENSDARG00000020711	2.654	1.40817	5.41521	22.7265	1.86777e-06	6.21894e-06	20	29518377	29525282	rrm2	ribonucleotide reductase M2 polypeptide [Source:ZFIN;Acc:ZDB-GENE-990415-25]
comp39377_c0_seq2	1.44732	ENSDARG00000020711	2.654	1.40817	5.41521	22.7265	1.86777e-06	6.21894e-06	20	29518377	29525282	rrm2	ribonucleotide reductase M2 polypeptide [Source:ZFIN;Acc:ZDB-GENE-990415-25]
comp40349_c0_seq2	2.12567	ENSDARG00000020730	1.31574	0.395872	4.31138	12.2112	0.00047503	0.00107062	21	17722272	17742012	smpd4	sphingomyelin phosphodiesterase 4 [Source:ZFIN;Acc:ZDB-GENE-040426-2672]
comp27706_c0_seq1	1.15004	ENSDARG00000020798	2.2957	1.19894	0.756227	11.386	0.00073998	0.00160444	19	11018578	11030565	necap1	NECAP endocytosis associated 1 [Source:ZFIN;Acc:ZDB-GENE-040426-1682]
comp27706_c0_seq1	1.15004	ENSDARG00000020798	2.2957	1.19894	0.756227	11.386	0.00073998	0.00160444	19	11018578	11030565	necap1	NECAP endocytosis associated 1 [Source:ZFIN;Acc:ZDB-GENE-040426-1682]
comp36051_c0_seq1	0.753517	ENSDARG00000020887	3.29732	1.72129	3.58911	83.6173	6.0045e-20	8.4748e-19	23	32151461	32157734	armc1l	armadillo repeat containing 1, like [Source:ZFIN;Acc:ZDB-GENE-030131-9819]
comp23646_c0_seq2	0.138236	ENSDARG00000020960	1.21817	0.284716	5.60812	5.91124	0.0150445	0.0254969	3	47647345	47690324	hgs	hepatocyte growth factor-regulated tyrosine kinase substrate [Source:ZFIN;Acc:ZDB-GENE-030131-6107]
comp27404_c0_seq1	0.904387	ENSDARG00000021082	3.66961	1.87563	4.4781	91.5692	1.0776e-21	1.7563e-20	10	5097525	5139190	sec31a	sec31 homolog A (S. cerevisiae) [Source:ZFIN;Acc:ZDB-GENE-020919-2]
comp27404_c0_seq11	0.740792	ENSDARG00000021082	3.66961	1.87563	4.4781	91.5692	1.0776e-21	1.7563e-20	10	5097525	5139190	sec31a	sec31 homolog A (S. cerevisiae) [Source:ZFIN;Acc:ZDB-GENE-020919-2]
comp27404_c0_seq12	7.86411	ENSDARG00000021082	3.66961	1.87563	4.4781	91.5692	1.0776e-21	1.7563e-20	10	5097525	5139190	sec31a	sec31 homolog A (S. cerevisiae) [Source:ZFIN;Acc:ZDB-GENE-020919-2]
comp27404_c0_seq13	0.90382	ENSDARG00000021082	3.66961	1.87563	4.4781	91.5692	1.0776e-21	1.7563e-20	10	5097525	5139190	sec31a	sec31 homolog A (S. cerevisiae) [Source:ZFIN;Acc:ZDB-GENE-020919-2]
comp27404_c0_seq14	0.829648	ENSDARG00000021082	3.66961	1.87563	4.4781	91.5692	1.0776e-21	1.7563e-20	10	5097525	5139190	sec31a	sec31 homolog A (S. cerevisiae) [Source:ZFIN;Acc:ZDB-GENE-020919-2]
comp27404_c0_seq15	0.666456	ENSDARG00000021082	3.66961	1.87563	4.4781	91.5692	1.0776e-21	1.7563e-20	10	5097525	5139190	sec31a	sec31 homolog A (S. cerevisiae) [Source:ZFIN;Acc:ZDB-GENE-020919-2]
comp27404_c0_seq3	0.180742	ENSDARG00000021082	3.66961	1.87563	4.4781	91.5692	1.0776e-21	1.7563e-20	10	5097525	5139190	sec31a	sec31 homolog A (S. cerevisiae) [Source:ZFIN;Acc:ZDB-GENE-020919-2]
comp27404_c0_seq5	0.0149029	ENSDARG00000021082	3.66961	1.87563	4.4781	91.5692	1.0776e-21	1.7563e-20	10	5097525	5139190	sec31a	sec31 homolog A (S. cerevisiae) [Source:ZFIN;Acc:ZDB-GENE-020919-2]
comp60658_c0_seq1	2.08614	ENSDARG00000021086	1.50661	0.591302	1.69839	7.29418	0.00691784	0.0125658	8	1279137	1288484	znf367	zinc finger protein 367 [Source:ZFIN;Acc:ZDB-GENE-050417-231]
comp26816_c0_seq1	1.93426	ENSDARG00000021110	1.34816	0.430993	2.89742	6.71426	0.00956449	0.0169324	25	18854268	18922771	poc1b	POC1 centriolar protein homolog B (Chlamydomonas) [Source:ZFIN;Acc:ZDB-GENE-031118-54]
comp26816_c0_seq1	1.93426	ENSDARG00000021110	1.34816	0.430993	2.89742	6.71426	0.00956449	0.0169324	25	18854268	18922771	poc1b	POC1 centriolar protein homolog B (Chlamydomonas) [Source:ZFIN;Acc:ZDB-GENE-031118-54]
comp26816_c0_seq2	0.594537	ENSDARG00000021110	1.34816	0.430993	2.89742	6.71426	0.00956449	0.0169324	25	18854268	18922771	poc1b	POC1 centriolar protein homolog B (Chlamydomonas) [Source:ZFIN;Acc:ZDB-GENE-031118-54]
comp26816_c0_seq2	0.594537	ENSDARG00000021110	1.34816	0.430993	2.89742	6.71426	0.00956449	0.0169324	25	18854268	18922771	poc1b	POC1 centriolar protein homolog B (Chlamydomonas) [Source:ZFIN;Acc:ZDB-GENE-031118-54]
comp33621_c0_seq1	0.150766	ENSDARG00000021110	1.34816	0.430993	2.89742	6.71426	0.00956449	0.0169324	25	18854268	18922771	poc1b	POC1 centriolar protein homolog B (Chlamydomonas) [Source:ZFIN;Acc:ZDB-GENE-031118-54]
comp27998_c0_seq1	1.14064	ENSDARG00000021120	1.20314	0.266803	5.13882	5.13959	0.0233862	0.0381502	2	26725023	26738798	ndc1	NDC1 transmembrane nucleoporin [Source:ZFIN;Acc:ZDB-GENE-030131-7176]
comp38330_c0_seq6	1.31912	ENSDARG00000021135	2.29951	1.20132	4.09479	55.5528	9.0981e-14	7.1966e-13	7	25206555	25214121	DHRS2	dehydrogenase/reductase (SDR family) member 2 [Source:HGNC Symbol;Acc:HGNC:18349]
comp77131_c0_seq1	4.70486	ENSDARG00000021135	2.29951	1.20132	4.09479	55.5528	9.0981e-14	7.1966e-13	7	25206555	25214121	DHRS2	dehydrogenase/reductase (SDR family) member 2 [Source:HGNC Symbol;Acc:HGNC:18349]
comp47858_c0_seq1	0.686578	ENSDARG00000021140	1.97362	0.980844	6.90648	20.5557	5.79213e-06	1.788e-05	19	12744070	12767891	pabpc1b	poly A binding protein, cytoplasmic 1 b [Source:ZFIN;Acc:ZDB-GENE-050308-1]
comp7099_c0_seq1	0.744278	ENSDARG00000021140	1.97362	0.980844	6.90648	20.5557	5.79213e-06	1.788e-05	19	12744070	12767891	pabpc1b	poly A binding protein, cytoplasmic 1 b [Source:ZFIN;Acc:ZDB-GENE-050308-1]
comp35953_c0_seq1	0.566856	ENSDARG00000021193	10.5085	3.39348	4.10065	378.977	2.0781e-84	6.0733e-82	5	33520724	33542177	coro1cb	coronin, actin binding protein, 1Cb [Source:ZFIN;Acc:ZDB-GENE-030131-418]
comp41704_c0_seq1	0.494022	ENSDARG00000021202	1.30485	0.383884	4.14753	12.4099	0.00042707	0.00097198	12	35730852	35734728	chmp6b	chromatin modifying protein 6b [Source:ZFIN;Acc:ZDB-GENE-040924-2]
comp28265_c0_seq3	1.25132	ENSDARG00000021255	2.82395	1.49771	3.04544	68.3245	1.3869e-16	1.4257e-15	13	31322377	31367135	arhgap22	Rho GTPase activating protein 22 [Source:ZFIN;Acc:ZDB-GENE-090313-87]
comp3929_c0_seq1	7.86411	ENSDARG00000021255	2.82395	1.49771	3.04544	68.3245	1.3869e-16	1.4257e-15	13	31322377	31367135	arhgap22	Rho GTPase activating protein 22 [Source:ZFIN;Acc:ZDB-GENE-090313-87]
comp42890_c0_seq1	3.34639	ENSDARG00000021255	2.82395	1.49771	3.04544	68.3245	1.3869e-16	1.4257e-15	13	31322377	31367135	arhgap22	Rho GTPase activating protein 22 [Source:ZFIN;Acc:ZDB-GENE-090313-87]
comp27938_c0_seq1	0.394238	ENSDARG00000021370	1.28179	0.358162	4.59331	6.63286	0.0100114	0.0176499	25	20075390	20084164	actr6	ARP6 actin-related protein 6 homolog (yeast) [Source:ZFIN;Acc:ZDB-GENE-030131-3543]
comp27938_c0_seq2	1.40809	ENSDARG00000021370	1.28179	0.358162	4.59331	6.63286	0.0100114	0.0176499	25	20075390	20084164	actr6	ARP6 actin-related protein 6 homolog (yeast) [Source:ZFIN;Acc:ZDB-GENE-030131-3543]
comp41125_c0_seq3	1.75196	ENSDARG00000021377	5.40739	2.43493	6.46375	286.254	3.2575e-64	4.6401e-62	21	42358649	42421307	sh3pxd2b	SH3 and PX domains 2B [Source:ZFIN;Acc:ZDB-GENE-060810-52]
comp41125_c0_seq4	0.125008	ENSDARG00000021377	5.40739	2.43493	6.46375	286.254	3.2575e-64	4.6401e-62	21	42358649	42421307	sh3pxd2b	SH3 and PX domains 2B [Source:ZFIN;Acc:ZDB-GENE-060810-52]
comp41125_c0_seq8	1.33948	ENSDARG00000021377	5.40739	2.43493	6.46375	286.254	3.2575e-64	4.6401e-62	21	42358649	42421307	sh3pxd2b	SH3 and PX domains 2B [Source:ZFIN;Acc:ZDB-GENE-060810-52]
comp40772_c0_seq2	9.95369	ENSDARG00000021408	2.19045	1.13123	4.44464	82.8119	9.0246e-20	1.2508e-18	21	34007230	34021094	kdelc2	KDEL (Lys-Asp-Glu-Leu) containing 2 [Source:ZFIN;Acc:ZDB-GENE-060810-142]
comp40772_c0_seq4	7.51435	ENSDARG00000021408	2.19045	1.13123	4.44464	82.8119	9.0246e-20	1.2508e-18	21	34007230	34021094	kdelc2	KDEL (Lys-Asp-Glu-Leu) containing 2 [Source:ZFIN;Acc:ZDB-GENE-060810-142]
comp40772_c0_seq6	7.97612	ENSDARG00000021408	2.19045	1.13123	4.44464	82.8119	9.0246e-20	1.2508e-18	21	34007230	34021094	kdelc2	KDEL (Lys-Asp-Glu-Leu) containing 2 [Source:ZFIN;Acc:ZDB-GENE-060810-142]
comp40772_c0_seq7	10.1575	ENSDARG00000021408	2.19045	1.13123	4.44464	82.8119	9.0246e-20	1.2508e-18	21	34007230	34021094	kdelc2	KDEL (Lys-Asp-Glu-Leu) containing 2 [Source:ZFIN;Acc:ZDB-GENE-060810-142]
comp30306_c0_seq1	1.18027	ENSDARG00000021442	1.4584	0.544385	5.51364	11.4931	0.00069856	0.00152261	7	44733496	44760755	cdh11	cadherin 11, osteoblast [Source:ZFIN;Acc:ZDB-GENE-980526-170]
comp30306_c0_seq2	2.03505	ENSDARG00000021442	1.4584	0.544385	5.51364	11.4931	0.00069856	0.00152261	7	44733496	44760755	cdh11	cadherin 11, osteoblast [Source:ZFIN;Acc:ZDB-GENE-980526-170]
comp57744_c0_seq1	0.401535	ENSDARG00000021442	1.4584	0.544385	5.51364	11.4931	0.00069856	0.00152261	7	44733496	44760755	cdh11	cadherin 11, osteoblast [Source:ZFIN;Acc:ZDB-GENE-980526-170]
comp60465_c0_seq1	0.180111	ENSDARG00000021442	1.4584	0.544385	5.51364	11.4931	0.00069856	0.00152261	7	44733496	44760755	cdh11	cadherin 11, osteoblast [Source:ZFIN;Acc:ZDB-GENE-980526-170]
comp77122_c0_seq1	1.37852	ENSDARG00000021442	1.4584	0.544385	5.51364	11.4931	0.00069856	0.00152261	7	44733496	44760755	cdh11	cadherin 11, osteoblast [Source:ZFIN;Acc:ZDB-GENE-980526-170]
comp32023_c0_seq1	0.868241	ENSDARG00000021539	2.03251	1.02327	4.40765	49.4909	1.9929e-12	1.3732e-11	11	29094981	29301026	ephb2b	eph receptor B2b [Source:ZFIN;Acc:ZDB-GENE-050522-415]
comp39931_c0_seq3	1.32268	ENSDARG00000021539	2.03251	1.02327	4.40765	49.4909	1.9929e-12	1.3732e-11	11	29094981	29301026	ephb2b	eph receptor B2b [Source:ZFIN;Acc:ZDB-GENE-050522-415]
comp40754_c0_seq1	5.6871	ENSDARG00000021720	7.33635	2.87506	8.38181	200.621	1.5283e-45	1.1215e-43	6	40115099	40242955	col7a1	collagen, type VII, alpha 1 [Source:ZFIN;Acc:ZDB-GENE-030131-2427]
comp40754_c0_seq10	6.91041	ENSDARG00000021720	7.33635	2.87506	8.38181	200.621	1.5283e-45	1.1215e-43	6	40115099	40242955	col7a1	collagen, type VII, alpha 1 [Source:ZFIN;Acc:ZDB-GENE-030131-2427]
comp40754_c0_seq11	3.23823	ENSDARG00000021720	7.33635	2.87506	8.38181	200.621	1.5283e-45	1.1215e-43	6	40115099	40242955	col7a1	collagen, type VII, alpha 1 [Source:ZFIN;Acc:ZDB-GENE-030131-2427]
comp40754_c0_seq12	1.31618	ENSDARG00000021720	7.33635	2.87506	8.38181	200.621	1.5283e-45	1.1215e-43	6	40115099	40242955	col7a1	collagen, type VII, alpha 1 [Source:ZFIN;Acc:ZDB-GENE-030131-2427]
comp40754_c0_seq13	4.93183	ENSDARG00000021720	7.33635	2.87506	8.38181	200.621	1.5283e-45	1.1215e-43	6	40115099	40242955	col7a1	collagen, type VII, alpha 1 [Source:ZFIN;Acc:ZDB-GENE-030131-2427]
comp40754_c0_seq14	2.88166	ENSDARG00000021720	7.33635	2.87506	8.38181	200.621	1.5283e-45	1.1215e-43	6	40115099	40242955	col7a1	collagen, type VII, alpha 1 [Source:ZFIN;Acc:ZDB-GENE-030131-2427]
comp40754_c0_seq15	9.07739	ENSDARG00000021720	7.33635	2.87506	8.38181	200.621	1.5283e-45	1.1215e-43	6	40115099	40242955	col7a1	collagen, type VII, alpha 1 [Source:ZFIN;Acc:ZDB-GENE-030131-2427]
comp40754_c0_seq16	2.68442	ENSDARG00000021720	7.33635	2.87506	8.38181	200.621	1.5283e-45	1.1215e-43	6	40115099	40242955	col7a1	collagen, type VII, alpha 1 [Source:ZFIN;Acc:ZDB-GENE-030131-2427]
comp40754_c0_seq2	3.32642	ENSDARG00000021720	7.33635	2.87506	8.38181	200.621	1.5283e-45	1.1215e-43	6	40115099	40242955	col7a1	collagen, type VII, alpha 1 [Source:ZFIN;Acc:ZDB-GENE-030131-2427]
comp40754_c0_seq3	5.55477	ENSDARG00000021720	7.33635	2.87506	8.38181	200.621	1.5283e-45	1.1215e-43	6	40115099	40242955	col7a1	collagen, type VII, alpha 1 [Source:ZFIN;Acc:ZDB-GENE-030131-2427]
comp40754_c0_seq4	5.07274	ENSDARG00000021720	7.33635	2.87506	8.38181	200.621	1.5283e-45	1.1215e-43	6	40115099	40242955	col7a1	collagen, type VII, alpha 1 [Source:ZFIN;Acc:ZDB-GENE-030131-2427]
comp40754_c0_seq5	0.915504	ENSDARG00000021720	7.33635	2.87506	8.38181	200.621	1.5283e-45	1.1215e-43	6	40115099	40242955	col7a1	collagen, type VII, alpha 1 [Source:ZFIN;Acc:ZDB-GENE-030131-2427]
comp40754_c0_seq6	1.47939	ENSDARG00000021720	7.33635	2.87506	8.38181	200.621	1.5283e-45	1.1215e-43	6	40115099	40242955	col7a1	collagen, type VII, alpha 1 [Source:ZFIN;Acc:ZDB-GENE-030131-2427]
comp40754_c0_seq7	6.7475	ENSDARG00000021720	7.33635	2.87506	8.38181	200.621	1.5283e-45	1.1215e-43	6	40115099	40242955	col7a1	collagen, type VII, alpha 1 [Source:ZFIN;Acc:ZDB-GENE-030131-2427]
comp40754_c0_seq8	6.85959	ENSDARG00000021720	7.33635	2.87506	8.38181	200.621	1.5283e-45	1.1215e-43	6	40115099	40242955	col7a1	collagen, type VII, alpha 1 [Source:ZFIN;Acc:ZDB-GENE-030131-2427]
comp40754_c0_seq9	1.08132	ENSDARG00000021720	7.33635	2.87506	8.38181	200.621	1.5283e-45	1.1215e-43	6	40115099	40242955	col7a1	collagen, type VII, alpha 1 [Source:ZFIN;Acc:ZDB-GENE-030131-2427]
comp41247_c0_seq39	5.01568	ENSDARG00000021720	7.33635	2.87506	8.38181	200.621	1.5283e-45	1.1215e-43	6	40115099	40242955	col7a1	collagen, type VII, alpha 1 [Source:ZFIN;Acc:ZDB-GENE-030131-2427]
comp34227_c0_seq2	9.33719	ENSDARG00000021794	4.59254	2.19929	4.19032	126.435	2.4701e-29	7.2818e-28	14	29565320	29583093	hmmr	hyaluronan-mediated motility receptor (RHAMM) [Source:ZFIN;Acc:ZDB-GENE-030131-731]
comp45953_c0_seq1	0.935788	ENSDARG00000021794	4.59254	2.19929	4.19032	126.435	2.4701e-29	7.2818e-28	14	29565320	29583093	hmmr	hyaluronan-mediated motility receptor (RHAMM) [Source:ZFIN;Acc:ZDB-GENE-030131-731]
comp34402_c0_seq1	0.433395	ENSDARG00000021808	1.36079	0.44444	4.1632	11.5422	0.00068035	0.00148732	16	30806591	30827565	nmt2	N-myristoyltransferase 2 [Source:ZFIN;Acc:ZDB-GENE-030131-717]
comp34856_c0_seq1	0.423896	ENSDARG00000021938	2.94723	1.55936	3.59568	96.4937	8.9528e-23	1.6283e-21	10	35985042	36004657	smad9	MAD homolog 9 (Drosophila) [Source:ZFIN;Acc:ZDB-GENE-031014-1]
comp34856_c0_seq1	0.423896	ENSDARG00000021938	2.94723	1.55936	3.59568	96.4937	8.9528e-23	1.6283e-21	10	35985042	36004657	smad9	MAD homolog 9 (Drosophila) [Source:ZFIN;Acc:ZDB-GENE-031014-1]
comp34856_c0_seq1	0.423896	ENSDARG00000021938	2.94723	1.55936	3.59568	96.4937	8.9528e-23	1.6283e-21	10	35985042	36004657	smad9	MAD homolog 9 (Drosophila) [Source:ZFIN;Acc:ZDB-GENE-031014-1]
comp37001_c0_seq1	2.52669	ENSDARG00000021948	123.504	6.94841	8.75921	613.878	1.604e-135	2.266e-132	5	30199064	30263575	tnc	tenascin C [Source:ZFIN;Acc:ZDB-GENE-980526-104]
comp37001_c0_seq2	3.34549	ENSDARG00000021948	123.504	6.94841	8.75921	613.878	1.604e-135	2.266e-132	5	30199064	30263575	tnc	tenascin C [Source:ZFIN;Acc:ZDB-GENE-980526-104]
comp37001_c0_seq3	4.48495	ENSDARG00000021948	123.504	6.94841	8.75921	613.878	1.604e-135	2.266e-132	5	30199064	30263575	tnc	tenascin C [Source:ZFIN;Acc:ZDB-GENE-980526-104]
comp24797_c0_seq1	0.958666	ENSDARG00000021974	1.5476	0.630032	1.72631	5.49876	0.0190299	0.0316561	13	24966614	24969178	sfr1	SWI5-dependent recombination repair 1 [Source:ZFIN;Acc:ZDB-GENE-070410-27]
comp24797_c0_seq2	0.0611819	ENSDARG00000021974	1.5476	0.630032	1.72631	5.49876	0.0190299	0.0316561	13	24966614	24969178	sfr1	SWI5-dependent recombination repair 1 [Source:ZFIN;Acc:ZDB-GENE-070410-27]
comp28728_c0_seq2	9.47067	ENSDARG00000021979	1.73565	0.79548	5.11322	42.1266	8.5553e-11	4.9293e-10	18	10268466	10372507	mical3a	microtubule associated monooxygenase, calponin and LIM domain containing 3a [Source:ZFIN;Acc:ZDB-GENE-050126-2]
comp28728_c0_seq3	7.30149	ENSDARG00000021979	1.73565	0.79548	5.11322	42.1266	8.5553e-11	4.9293e-10	18	10268466	10372507	mical3a	microtubule associated monooxygenase, calponin and LIM domain containing 3a [Source:ZFIN;Acc:ZDB-GENE-050126-2]
comp49007_c0_seq1	1.30116	ENSDARG00000021979	1.73565	0.79548	5.11322	42.1266	8.5553e-11	4.9293e-10	18	10268466	10372507	mical3a	microtubule associated monooxygenase, calponin and LIM domain containing 3a [Source:ZFIN;Acc:ZDB-GENE-050126-2]
comp7646_c0_seq1	0.165853	ENSDARG00000021979	1.73565	0.79548	5.11322	42.1266	8.5553e-11	4.9293e-10	18	10268466	10372507	mical3a	microtubule associated monooxygenase, calponin and LIM domain containing 3a [Source:ZFIN;Acc:ZDB-GENE-050126-2]
comp40782_c0_seq1	1.38028	ENSDARG00000022020	2.39126	1.25777	2.96074	43.4412	4.3689e-11	2.6122e-10	7	20098272	20194243	FOCAD	focadhesin [Source:HGNC Symbol;Acc:HGNC:23377]
comp40782_c0_seq3	0.322072	ENSDARG00000022020	2.39126	1.25777	2.96074	43.4412	4.3689e-11	2.6122e-10	7	20098272	20194243	FOCAD	focadhesin [Source:HGNC Symbol;Acc:HGNC:23377]
comp12345_c0_seq1	0.983578	ENSDARG00000022045	2.31545	1.21129	5.55398	33.96	5.62569e-09	2.62775e-08	25	19846659	19923316	map1ab	microtubule-associated protein 1Ab [Source:ZFIN;Acc:ZDB-GENE-100426-3]
comp50019_c0_seq1	0.450693	ENSDARG00000022045	2.31545	1.21129	5.55398	33.96	5.62569e-09	2.62775e-08	25	19846659	19923316	map1ab	microtubule-associated protein 1Ab [Source:ZFIN;Acc:ZDB-GENE-100426-3]
comp17808_c0_seq1	0.487432	ENSDARG00000022187	1.65971	0.730935	3.43015	24.1352	8.98049e-07	3.12648e-06	4	22708297	22809614	usp6nl	USP6 N-terminal like [Source:ZFIN;Acc:ZDB-GENE-041210-192]
comp29888_c0_seq1	1.09083	ENSDARG00000022187	1.65971	0.730935	3.43015	24.1352	8.98049e-07	3.12648e-06	4	22708297	22809614	usp6nl	USP6 N-terminal like [Source:ZFIN;Acc:ZDB-GENE-041210-192]
comp15494_c0_seq2	1.02868	ENSDARG00000022232	1.68888	0.756068	5.11768	32.1184	1.45059e-08	6.43185e-08	3	55405603	55419633	ppan	peter pan homolog (Drosophila) [Source:ZFIN;Acc:ZDB-GENE-030114-4]
comp10257_c0_seq1	1.67276	ENSDARG00000022315	1.24986	0.321762	6.62733	7.33734	0.00675368	0.0122861	5	58762437	58767881	atp6v1g1	ATPase, H+ transporting, V1 subunit G isoform 1 [Source:ZFIN;Acc:ZDB-GENE-030131-6965]
comp25457_c0_seq1	0.466937	ENSDARG00000022350	1.42388	0.509824	3.78534	11.5615	0.00067332	0.00147327	20	23658746	23696116	nek1	NIMA (never in mitosis gene a)-related kinase 1 [Source:ZFIN;Acc:ZDB-GENE-040730-1]
comp27970_c0_seq1	0.662172	ENSDARG00000022350	1.42388	0.509824	3.78534	11.5615	0.00067332	0.00147327	20	23658746	23696116	nek1	NIMA (never in mitosis gene a)-related kinase 1 [Source:ZFIN;Acc:ZDB-GENE-040730-1]
comp79831_c0_seq1	0.175216	ENSDARG00000022350	1.42388	0.509824	3.78534	11.5615	0.00067332	0.00147327	20	23658746	23696116	nek1	NIMA (never in mitosis gene a)-related kinase 1 [Source:ZFIN;Acc:ZDB-GENE-040730-1]
comp42436_c0_seq1	0.560134	ENSDARG00000022418	1.29845	0.376793	5.08968	12.1052	0.00050281	0.0011274	8	16794178	16925840	faf1	Fas associated factor 1 [Source:ZFIN;Acc:ZDB-GENE-040426-2863]
comp40660_c0_seq1	10.7734	ENSDARG00000022659	1.22519	0.293004	6.25431	8.19472	0.00420124	0.00795435	9	39640390	39673511	snx4	sorting nexin 4 [Source:ZFIN;Acc:ZDB-GENE-030131-1923]
comp40743_c0_seq12	0.458257	ENSDARG00000022682	1.65756	0.729061	4.09459	23.7076	1.12138e-06	3.85801e-06	21	2830598	2909812	add1	adducin 1 (alpha) [Source:ZFIN;Acc:ZDB-GENE-030909-2]
comp40743_c0_seq12	0.458257	ENSDARG00000022682	1.65756	0.729061	4.09459	23.7076	1.12138e-06	3.85801e-06	21	2830598	2909812	add1	adducin 1 (alpha) [Source:ZFIN;Acc:ZDB-GENE-030909-2]
comp40743_c0_seq14	9.72697	ENSDARG00000022682	1.65756	0.729061	4.09459	23.7076	1.12138e-06	3.85801e-06	21	2830598	2909812	add1	adducin 1 (alpha) [Source:ZFIN;Acc:ZDB-GENE-030909-2]
comp40743_c0_seq22	0.248108	ENSDARG00000022682	1.65756	0.729061	4.09459	23.7076	1.12138e-06	3.85801e-06	21	2830598	2909812	add1	adducin 1 (alpha) [Source:ZFIN;Acc:ZDB-GENE-030909-2]
comp40743_c0_seq4	0.74162	ENSDARG00000022682	1.65756	0.729061	4.09459	23.7076	1.12138e-06	3.85801e-06	21	2830598	2909812	add1	adducin 1 (alpha) [Source:ZFIN;Acc:ZDB-GENE-030909-2]
comp40743_c0_seq4	0.74162	ENSDARG00000022682	1.65756	0.729061	4.09459	23.7076	1.12138e-06	3.85801e-06	21	2830598	2909812	add1	adducin 1 (alpha) [Source:ZFIN;Acc:ZDB-GENE-030909-2]
comp40743_c0_seq8	0.969171	ENSDARG00000022682	1.65756	0.729061	4.09459	23.7076	1.12138e-06	3.85801e-06	21	2830598	2909812	add1	adducin 1 (alpha) [Source:ZFIN;Acc:ZDB-GENE-030909-2]
comp40743_c0_seq8	0.969171	ENSDARG00000022682	1.65756	0.729061	4.09459	23.7076	1.12138e-06	3.85801e-06	21	2830598	2909812	add1	adducin 1 (alpha) [Source:ZFIN;Acc:ZDB-GENE-030909-2]
comp38487_c0_seq1	0.282782	ENSDARG00000022728	1.5332	0.616547	4.45093	20.9914	4.61356e-06	1.45065e-05	11	45463118	45481037	rbm34	RNA binding motif protein 34 [Source:ZFIN;Acc:ZDB-GENE-040718-77]
comp27772_c0_seq1	0.184069	ENSDARG00000023028	1.5797	0.659655	6.69787	26.5912	2.51392e-07	9.50131e-07	24	9681949	9694524	cdv3	carnitine deficiency-associated gene expressed in ventricle 3 [Source:ZFIN;Acc:ZDB-GENE-030131-6034]
comp51841_c0_seq1	1.65575	ENSDARG00000023104	1.26973	0.344527	3.86663	5.70062	0.0169589	0.028468	25	33503547	33722350	scaper	S phase cyclin A-associated protein in the ER [Source:ZFIN;Acc:ZDB-GENE-060303-5]
comp61820_c0_seq1	0.394676	ENSDARG00000023104	1.26973	0.344527	3.86663	5.70062	0.0169589	0.028468	25	33503547	33722350	scaper	S phase cyclin A-associated protein in the ER [Source:ZFIN;Acc:ZDB-GENE-060303-5]
comp65460_c0_seq1	2.25293	ENSDARG00000023104	1.26973	0.344527	3.86663	5.70062	0.0169589	0.028468	25	33503547	33722350	scaper	S phase cyclin A-associated protein in the ER [Source:ZFIN;Acc:ZDB-GENE-060303-5]
comp70029_c0_seq1	0.495139	ENSDARG00000023104	1.26973	0.344527	3.86663	5.70062	0.0169589	0.028468	25	33503547	33722350	scaper	S phase cyclin A-associated protein in the ER [Source:ZFIN;Acc:ZDB-GENE-060303-5]
comp74314_c0_seq1	4.30815	ENSDARG00000023104	1.26973	0.344527	3.86663	5.70062	0.0169589	0.028468	25	33503547	33722350	scaper	S phase cyclin A-associated protein in the ER [Source:ZFIN;Acc:ZDB-GENE-060303-5]
comp75871_c0_seq1	1.59901	ENSDARG00000023104	1.26973	0.344527	3.86663	5.70062	0.0169589	0.028468	25	33503547	33722350	scaper	S phase cyclin A-associated protein in the ER [Source:ZFIN;Acc:ZDB-GENE-060303-5]
comp79303_c0_seq1	0.168352	ENSDARG00000023104	1.26973	0.344527	3.86663	5.70062	0.0169589	0.028468	25	33503547	33722350	scaper	S phase cyclin A-associated protein in the ER [Source:ZFIN;Acc:ZDB-GENE-060303-5]
comp30319_c0_seq1	1.01487	ENSDARG00000023160	1.59822	0.676467	4.34672	25.6773	4.03553e-07	1.47778e-06	19	44607303	44619290	snrnp40	small nuclear ribonucleoprotein 40 (U5) [Source:ZFIN;Acc:ZDB-GENE-040426-978]
comp10707_c0_seq1	0.473431	ENSDARG00000023330	1.47478	0.560495	7.84523	22.1725	2.49213e-06	8.14267e-06	1	25626438	25630909	anp32b	acidic (leucine-rich) nuclear phosphoprotein 32 family, member B [Source:ZFIN;Acc:ZDB-GENE-030131-719]
comp13078_c0_seq1	0.00234532	ENSDARG00000023330	1.47478	0.560495	7.84523	22.1725	2.49213e-06	8.14267e-06	1	25626438	25630909	anp32b	acidic (leucine-rich) nuclear phosphoprotein 32 family, member B [Source:ZFIN;Acc:ZDB-GENE-030131-719]
comp40507_c0_seq1	1.76318	ENSDARG00000023484	2.11989	1.08399	1.35081	12.1338	0.00049516	0.00111217	8	45381426	45404021	fam101a	family with sequence similarity 101, member A [Source:ZFIN;Acc:ZDB-GENE-030616-80]
comp35932_c0_seq1	0.394205	ENSDARG00000023508	1.8764	0.907971	1.65824	15.264	9.34824e-05	0.00023793	15	2843813	2847088	ankrd49	ankyrin repeat domain 49 [Source:ZFIN;Acc:ZDB-GENE-050417-46]
comp35932_c0_seq2	0.891334	ENSDARG00000023508	1.8764	0.907971	1.65824	15.264	9.34824e-05	0.00023793	15	2843813	2847088	ankrd49	ankyrin repeat domain 49 [Source:ZFIN;Acc:ZDB-GENE-050417-46]
comp16377_c0_seq1	0.464622	ENSDARG00000023584	1.87737	0.908712	2.30918	20.5705	5.74758e-06	1.77528e-05	2	10655247	10669070	cdc7	cell division cycle 7 homolog (S. cerevisiae) [Source:ZFIN;Acc:ZDB-GENE-041114-113]
comp40961_c0_seq2	9.30894	ENSDARG00000023766	1.63264	0.707203	4.9195	27.0631	1.96919e-07	7.53664e-07	4	4382707	4396995	gnsa	glucosamine (N-acetyl)-6-sulfatase a [Source:ZFIN;Acc:ZDB-GENE-050107-5]
comp40961_c0_seq4	9.60451	ENSDARG00000023766	1.63264	0.707203	4.9195	27.0631	1.96919e-07	7.53664e-07	4	4382707	4396995	gnsa	glucosamine (N-acetyl)-6-sulfatase a [Source:ZFIN;Acc:ZDB-GENE-050107-5]
comp7596_c0_seq1	0.83494	ENSDARG00000023933	3.70998	1.89141	1.66461	41.6877	1.0708e-10	6.1053e-10	2	37028246	37073405	skila	SKI-like oncogene a [Source:ZFIN;Acc:ZDB-GENE-070912-548]
comp16220_c1_seq1	5.27127	ENSDARG00000023958	1.23734	0.307248	4.81824	5.56536	0.0183193	0.030576	5	28400570	28409737	rnf181	ring finger protein 181 [Source:ZFIN;Acc:ZDB-GENE-040426-1024]
comp15688_c0_seq3	0.442889	ENSDARG00000023963	3.8502	1.94493	7.98438	90.058	2.3128e-21	3.6846e-20	22	15724318	15748689	tpm4a	tropomyosin 4a [Source:ZFIN;Acc:ZDB-GENE-040426-2185]
comp27156_c0_seq1	0.0803386	ENSDARG00000023999	1.43029	0.516311	3.62332	11.9034	0.00056031	0.00124398	17	28683494	28729024	heatr5a	HEAT repeat containing 5a [Source:ZFIN;Acc:ZDB-GENE-030616-152]
comp36293_c0_seq1	0.287505	ENSDARG00000023999	1.43029	0.516311	3.62332	11.9034	0.00056031	0.00124398	17	28683494	28729024	heatr5a	HEAT repeat containing 5a [Source:ZFIN;Acc:ZDB-GENE-030616-152]
comp30325_c0_seq1	0.917494	ENSDARG00000024109	1.54474	0.62736	5.80684	26.3026	2.91892e-07	1.09394e-06	7	26167151	26178688	naa40	N(alpha)-acetyltransferase 40, NatD catalytic subunit, homolog (S. cerevisiae) [Source:ZFIN;Acc:ZDB-GENE-050417-105]
comp26794_c0_seq1	0.0376546	ENSDARG00000024209	1.22397	0.291572	6.6787	6.08395	0.0136415	0.0233785	19	45040524	45059962	wasf2	WAS protein family, member 2 [Source:ZFIN;Acc:ZDB-GENE-040426-865]
comp26794_c0_seq1	0.0376546	ENSDARG00000024209	1.22397	0.291572	6.6787	6.08395	0.0136415	0.0233785	19	45040524	45059962	wasf2	WAS protein family, member 2 [Source:ZFIN;Acc:ZDB-GENE-040426-865]
comp26794_c0_seq1	0.0376546	ENSDARG00000024209	1.22397	0.291572	6.6787	6.08395	0.0136415	0.0233785	19	45040524	45059962	wasf2	WAS protein family, member 2 [Source:ZFIN;Acc:ZDB-GENE-040426-865]
comp26794_c0_seq2	0.64151	ENSDARG00000024209	1.22397	0.291572	6.6787	6.08395	0.0136415	0.0233785	19	45040524	45059962	wasf2	WAS protein family, member 2 [Source:ZFIN;Acc:ZDB-GENE-040426-865]
comp26794_c0_seq2	0.64151	ENSDARG00000024209	1.22397	0.291572	6.6787	6.08395	0.0136415	0.0233785	19	45040524	45059962	wasf2	WAS protein family, member 2 [Source:ZFIN;Acc:ZDB-GENE-040426-865]
comp26794_c0_seq2	0.64151	ENSDARG00000024209	1.22397	0.291572	6.6787	6.08395	0.0136415	0.0233785	19	45040524	45059962	wasf2	WAS protein family, member 2 [Source:ZFIN;Acc:ZDB-GENE-040426-865]
comp29503_c0_seq1	2.0984	ENSDARG00000024325	1.40087	0.486324	5.85299	11.0501	0.00088681	0.00189707	5	52599245	52654187	col4a3bpa	collagen, type IV, alpha 3 (Goodpasture antigen) binding protein a [Source:ZFIN;Acc:ZDB-GENE-080724-10]
comp29503_c0_seq2	0.361442	ENSDARG00000024325	1.40087	0.486324	5.85299	11.0501	0.00088681	0.00189707	5	52599245	52654187	col4a3bpa	collagen, type IV, alpha 3 (Goodpasture antigen) binding protein a [Source:ZFIN;Acc:ZDB-GENE-080724-10]
comp17286_c0_seq2	7.464	ENSDARG00000024471	2.05125	1.0365	2.56402	28.384	9.94836e-08	3.95577e-07	20	37838953	37845547	nsl1	NSL1, MIND kinetochore complex component, homolog (S. cerevisiae) [Source:ZFIN;Acc:ZDB-GENE-041014-362]
comp35316_c0_seq1	0.826045	ENSDARG00000024479	1.3488	0.431674	2.45377	5.7538	0.0164531	0.0276957	2	8846226	8922838	pigk	phosphatidylinositol glycan, class K [Source:ZFIN;Acc:ZDB-GENE-040625-162]
comp37634_c0_seq2	0.761541	ENSDARG00000024540	1.96312	0.973147	6.01778	43.4019	4.4576e-11	2.6634e-10	8	30574662	30582993	zgc:100919	zgc:100919 [Source:ZFIN;Acc:ZDB-GENE-040718-248]
comp17516_c0_seq1	0.400198	ENSDARG00000024561	2.05425	1.03861	5.20236	34.498	4.26684e-09	2.02314e-08	13	4649847	4669031	nolc1	nucleolar and coiled-body phosphoprotein 1 [Source:ZFIN;Acc:ZDB-GENE-030131-6349]
comp30315_c0_seq2	0.544642	ENSDARG00000024561	2.05425	1.03861	5.20236	34.498	4.26684e-09	2.02314e-08	13	4649847	4669031	nolc1	nucleolar and coiled-body phosphoprotein 1 [Source:ZFIN;Acc:ZDB-GENE-030131-6349]
comp30583_c0_seq1	1.78163	ENSDARG00000024561	2.05425	1.03861	5.20236	34.498	4.26684e-09	2.02314e-08	13	4649847	4669031	nolc1	nucleolar and coiled-body phosphoprotein 1 [Source:ZFIN;Acc:ZDB-GENE-030131-6349]
comp39521_c0_seq1	0.601699	ENSDARG00000024694	3.58689	1.84273	6.22868	218.663	1.7699e-49	1.5077e-47	9	16341860	16460226	myo1b	myosin IB [Source:ZFIN;Acc:ZDB-GENE-030131-695]
comp39521_c0_seq2	1.51158	ENSDARG00000024694	3.58689	1.84273	6.22868	218.663	1.7699e-49	1.5077e-47	9	16341860	16460226	myo1b	myosin IB [Source:ZFIN;Acc:ZDB-GENE-030131-695]
comp39521_c0_seq3	0.293033	ENSDARG00000024694	3.58689	1.84273	6.22868	218.663	1.7699e-49	1.5077e-47	9	16341860	16460226	myo1b	myosin IB [Source:ZFIN;Acc:ZDB-GENE-030131-695]
comp55904_c0_seq1	5.99321	ENSDARG00000024694	3.58689	1.84273	6.22868	218.663	1.7699e-49	1.5077e-47	9	16341860	16460226	myo1b	myosin IB [Source:ZFIN;Acc:ZDB-GENE-030131-695]
comp27336_c0_seq1	0.911378	ENSDARG00000024759	3.24403	1.69779	3.1915	40.8375	1.6543e-10	9.2579e-10	2	21283052	21300265	inhbab	inhibin, beta Ab [Source:ZFIN;Acc:ZDB-GENE-050525-2]
comp32702_c0_seq1	7.563	ENSDARG00000024828	1.5356	0.618798	4.66428	29.3366	6.0836e-08	2.48849e-07	1	40245069	40258446	tmem134	transmembrane protein 134 [Source:ZFIN;Acc:ZDB-GENE-040426-1345]
comp22613_c0_seq1	1.05606	ENSDARG00000024874	1.98839	0.991602	1.61409	13.5056	0.00023786	0.00056509	4	6222621	6379374	dock4b	dedicator of cytokinesis 4b [Source:ZFIN;Acc:ZDB-GENE-060130-74]
comp47972_c0_seq1	1.16469	ENSDARG00000024874	1.98839	0.991602	1.61409	13.5056	0.00023786	0.00056509	4	6222621	6379374	dock4b	dedicator of cytokinesis 4b [Source:ZFIN;Acc:ZDB-GENE-060130-74]
comp48214_c0_seq1	1.10401	ENSDARG00000024874	1.98839	0.991602	1.61409	13.5056	0.00023786	0.00056509	4	6222621	6379374	dock4b	dedicator of cytokinesis 4b [Source:ZFIN;Acc:ZDB-GENE-060130-74]
comp49973_c0_seq1	0.630582	ENSDARG00000024874	1.98839	0.991602	1.61409	13.5056	0.00023786	0.00056509	4	6222621	6379374	dock4b	dedicator of cytokinesis 4b [Source:ZFIN;Acc:ZDB-GENE-060130-74]
comp51703_c0_seq1	3.07197	ENSDARG00000024874	1.98839	0.991602	1.61409	13.5056	0.00023786	0.00056509	4	6222621	6379374	dock4b	dedicator of cytokinesis 4b [Source:ZFIN;Acc:ZDB-GENE-060130-74]
comp59924_c0_seq1	1.0175	ENSDARG00000024874	1.98839	0.991602	1.61409	13.5056	0.00023786	0.00056509	4	6222621	6379374	dock4b	dedicator of cytokinesis 4b [Source:ZFIN;Acc:ZDB-GENE-060130-74]
comp46036_c0_seq1	2.79883	ENSDARG00000024904	2.13035	1.09109	1.38492	20.4424	6.14531e-06	1.88883e-05	22	16106165	16118685	stil	TAL1 (SCL) interrupting locus [Source:ZFIN;Acc:ZDB-GENE-020419-39]
comp4743_c0_seq1	3.82105	ENSDARG00000024904	2.13035	1.09109	1.38492	20.4424	6.14531e-06	1.88883e-05	22	16106165	16118685	stil	TAL1 (SCL) interrupting locus [Source:ZFIN;Acc:ZDB-GENE-020419-39]
comp48709_c0_seq1	1.17232	ENSDARG00000024904	2.13035	1.09109	1.38492	20.4424	6.14531e-06	1.88883e-05	22	16106165	16118685	stil	TAL1 (SCL) interrupting locus [Source:ZFIN;Acc:ZDB-GENE-020419-39]
comp53887_c0_seq1	1.23809	ENSDARG00000024904	2.13035	1.09109	1.38492	20.4424	6.14531e-06	1.88883e-05	22	16106165	16118685	stil	TAL1 (SCL) interrupting locus [Source:ZFIN;Acc:ZDB-GENE-020419-39]
comp50867_c0_seq1	1.33303	ENSDARG00000024967	1.6719	0.741486	2.32004	16.7179	4.337e-05	0.00011653	5	43115072	43127921	fancg	Fanconi anemia, complementation group G [Source:ZFIN;Acc:ZDB-GENE-050417-103]
comp42188_c0_seq1	1.01759	ENSDARG00000025043	5.1704	2.37028	3.63845	184.629	4.7287e-42	2.8937e-40	16	56493081	56517756	trip13	thyroid hormone receptor interactor 13 [Source:ZFIN;Acc:ZDB-GENE-040426-1488]
comp34533_c0_seq2	0.405832	ENSDARG00000025212	1.19255	0.254055	4.14997	4.89565	0.0269244	0.0433219	23	37160126	37184069	cpsf3l	cleavage and polyadenylation specific factor 3-like [Source:ZFIN;Acc:ZDB-GENE-050522-13]
comp37830_c0_seq1	0.117268	ENSDARG00000025285	1.24283	0.313629	4.91508	5.13142	0.0234965	0.0383155	15	2466960	2481000	panx1a	pannexin 1a [Source:ZFIN;Acc:ZDB-GENE-040426-766]
comp63562_c0_seq1	0.49982	ENSDARG00000025326	2.24576	1.1672	4.8553	85.0797	2.8658e-20	4.1449e-19	2	30624964	30627754	myl12.2	myosin, light chain 12, genome duplicate 2 [Source:ZFIN;Acc:ZDB-GENE-030131-9028]
comp41007_c0_seq1	10.322	ENSDARG00000025348	1.44822	0.534281	7.07036	15.3058	9.14341e-05	0.00023312	9	47869570	47891113	igfbp5b	insulin-like growth factor binding protein 5b [Source:ZFIN;Acc:ZDB-GENE-040319-2]
comp41007_c0_seq1	10.322	ENSDARG00000025348	1.44822	0.534281	7.07036	15.3058	9.14341e-05	0.00023312	9	47869570	47891113	igfbp5b	insulin-like growth factor binding protein 5b [Source:ZFIN;Acc:ZDB-GENE-040319-2]
comp41007_c0_seq1	10.322	ENSDARG00000025348	1.44822	0.534281	7.07036	15.3058	9.14341e-05	0.00023312	9	47869570	47891113	igfbp5b	insulin-like growth factor binding protein 5b [Source:ZFIN;Acc:ZDB-GENE-040319-2]
comp41007_c0_seq1	10.322	ENSDARG00000025348	1.44822	0.534281	7.07036	15.3058	9.14341e-05	0.00023312	9	47869570	47891113	igfbp5b	insulin-like growth factor binding protein 5b [Source:ZFIN;Acc:ZDB-GENE-040319-2]
comp41007_c0_seq3	1.05918	ENSDARG00000025348	1.44822	0.534281	7.07036	15.3058	9.14341e-05	0.00023312	9	47869570	47891113	igfbp5b	insulin-like growth factor binding protein 5b [Source:ZFIN;Acc:ZDB-GENE-040319-2]
comp41007_c0_seq3	1.05918	ENSDARG00000025348	1.44822	0.534281	7.07036	15.3058	9.14341e-05	0.00023312	9	47869570	47891113	igfbp5b	insulin-like growth factor binding protein 5b [Source:ZFIN;Acc:ZDB-GENE-040319-2]
comp41007_c0_seq3	1.05918	ENSDARG00000025348	1.44822	0.534281	7.07036	15.3058	9.14341e-05	0.00023312	9	47869570	47891113	igfbp5b	insulin-like growth factor binding protein 5b [Source:ZFIN;Acc:ZDB-GENE-040319-2]
comp41007_c0_seq3	1.05918	ENSDARG00000025348	1.44822	0.534281	7.07036	15.3058	9.14341e-05	0.00023312	9	47869570	47891113	igfbp5b	insulin-like growth factor binding protein 5b [Source:ZFIN;Acc:ZDB-GENE-040319-2]
comp41007_c0_seq7	11.7961	ENSDARG00000025348	1.44822	0.534281	7.07036	15.3058	9.14341e-05	0.00023312	9	47869570	47891113	igfbp5b	insulin-like growth factor binding protein 5b [Source:ZFIN;Acc:ZDB-GENE-040319-2]
comp41007_c0_seq7	11.7961	ENSDARG00000025348	1.44822	0.534281	7.07036	15.3058	9.14341e-05	0.00023312	9	47869570	47891113	igfbp5b	insulin-like growth factor binding protein 5b [Source:ZFIN;Acc:ZDB-GENE-040319-2]
comp41007_c0_seq7	11.7961	ENSDARG00000025348	1.44822	0.534281	7.07036	15.3058	9.14341e-05	0.00023312	9	47869570	47891113	igfbp5b	insulin-like growth factor binding protein 5b [Source:ZFIN;Acc:ZDB-GENE-040319-2]
comp41007_c0_seq7	11.7961	ENSDARG00000025348	1.44822	0.534281	7.07036	15.3058	9.14341e-05	0.00023312	9	47869570	47891113	igfbp5b	insulin-like growth factor binding protein 5b [Source:ZFIN;Acc:ZDB-GENE-040319-2]
comp41007_c0_seq9	0.184323	ENSDARG00000025348	1.44822	0.534281	7.07036	15.3058	9.14341e-05	0.00023312	9	47869570	47891113	igfbp5b	insulin-like growth factor binding protein 5b [Source:ZFIN;Acc:ZDB-GENE-040319-2]
comp41007_c0_seq9	0.184323	ENSDARG00000025348	1.44822	0.534281	7.07036	15.3058	9.14341e-05	0.00023312	9	47869570	47891113	igfbp5b	insulin-like growth factor binding protein 5b [Source:ZFIN;Acc:ZDB-GENE-040319-2]
comp41007_c0_seq9	0.184323	ENSDARG00000025348	1.44822	0.534281	7.07036	15.3058	9.14341e-05	0.00023312	9	47869570	47891113	igfbp5b	insulin-like growth factor binding protein 5b [Source:ZFIN;Acc:ZDB-GENE-040319-2]
comp15168_c0_seq1	0.659529	ENSDARG00000025375	1.4413	0.527374	7.51816	19.6864	9.12499e-06	2.73211e-05	9	29138150	29161591	idh1	isocitrate dehydrogenase 1 (NADP+), soluble [Source:ZFIN;Acc:ZDB-GENE-031006-1]
comp34706_c0_seq2	0.412392	ENSDARG00000025404	1.41221	0.497956	5.1228	23.6552	1.15233e-06	3.9573e-06	6	9186808	9197775	ube2g2	ubiquitin-conjugating enzyme E2G 2 (UBC7 homolog, yeast) [Source:ZFIN;Acc:ZDB-GENE-050417-288]
comp17792_c0_seq1	0.272833	ENSDARG00000025641	4.75689	2.25002	5.37155	194.368	3.5388e-44	2.4091e-42	9	38194145	38349217	gli2a	GLI-Kruppel family member GLI2a [Source:ZFIN;Acc:ZDB-GENE-990706-8]
comp18777_c0_seq1	0.258289	ENSDARG00000025641	4.75689	2.25002	5.37155	194.368	3.5388e-44	2.4091e-42	9	38194145	38349217	gli2a	GLI-Kruppel family member GLI2a [Source:ZFIN;Acc:ZDB-GENE-990706-8]
comp37465_c0_seq1	0.890464	ENSDARG00000025641	4.75689	2.25002	5.37155	194.368	3.5388e-44	2.4091e-42	9	38194145	38349217	gli2a	GLI-Kruppel family member GLI2a [Source:ZFIN;Acc:ZDB-GENE-990706-8]
comp38104_c0_seq2	0.908807	ENSDARG00000025641	4.75689	2.25002	5.37155	194.368	3.5388e-44	2.4091e-42	9	38194145	38349217	gli2a	GLI-Kruppel family member GLI2a [Source:ZFIN;Acc:ZDB-GENE-990706-8]
comp38104_c0_seq2	0.908807	ENSDARG00000025641	4.75689	2.25002	5.37155	194.368	3.5388e-44	2.4091e-42	9	38194145	38349217	gli2a	GLI-Kruppel family member GLI2a [Source:ZFIN;Acc:ZDB-GENE-990706-8]
comp37357_c0_seq1	2.16474	ENSDARG00000025679	2.05301	1.03774	2.05416	14.2507	0.00016	0.00039109	11	26553451	26565001	comtb	catechol-O-methyltransferase b [Source:ZFIN;Acc:ZDB-GENE-040724-164]
comp49351_c0_seq1	1.16469	ENSDARG00000025808	1.53665	0.61979	3.1663	15.6758	7.518e-05	0.00019415	1	54475847	54485532	taf5l	TAF5-like RNA polymerase II, p300/CBP-associated factor (PCAF)-associated factor [Source:ZFIN;Acc:ZDB-GENE-030131-5987]
comp58677_c0_seq1	1.15883	ENSDARG00000025808	1.53665	0.61979	3.1663	15.6758	7.518e-05	0.00019415	1	54475847	54485532	taf5l	TAF5-like RNA polymerase II, p300/CBP-associated factor (PCAF)-associated factor [Source:ZFIN;Acc:ZDB-GENE-030131-5987]
comp40524_c0_seq2	0.180954	ENSDARG00000025858	1.54343	0.626144	7.00169	32.746	1.0502e-08	4.73455e-08	8	51352883	51372884	GOLM1	golgi membrane protein 1 [Source:HGNC Symbol;Acc:HGNC:15451]
comp40524_c0_seq2	0.180954	ENSDARG00000025858	1.54343	0.626144	7.00169	32.746	1.0502e-08	4.73455e-08	8	51352883	51372884	GOLM1	golgi membrane protein 1 [Source:HGNC Symbol;Acc:HGNC:15451]
comp34758_c0_seq1	0.135027	ENSDARG00000025902	2.78013	1.47515	5.06778	103.845	2.1881e-24	4.5961e-23	11	25398965	25471874	plekhg5a	pleckstrin homology domain containing, family G (with RhoGef domain) member 5a [Source:ZFIN;Acc:ZDB-GENE-060503-766]
comp16113_c0_seq1	0.329573	ENSDARG00000025972	1.47278	0.558546	5.87438	20.2171	6.91305e-06	2.10723e-05	14	34482594	34488065	mcts1	malignant T cell amplified sequence 1 [Source:ZFIN;Acc:ZDB-GENE-040426-957]
comp39828_c0_seq1	0.288638	ENSDARG00000025977	1.48321	0.568726	5.85242	22.3803	2.2366e-06	7.36025e-06	15	27983464	28134396	blmh	bleomycin hydrolase [Source:ZFIN;Acc:ZDB-GENE-030131-8485]
comp39828_c0_seq2	12.5601	ENSDARG00000025977	1.48321	0.568726	5.85242	22.3803	2.2366e-06	7.36025e-06	15	27983464	28134396	blmh	bleomycin hydrolase [Source:ZFIN;Acc:ZDB-GENE-030131-8485]
comp41130_c0_seq1	2.04189	ENSDARG00000026166	6.68265	2.74042	6.10608	324.233	1.7333e-72	3.3772e-70	17	12303378	12361508	emilin1b	elastin microfibril interfacer 1b [Source:ZFIN;Acc:ZDB-GENE-060818-36]
comp41744_c0_seq1	0.478259	ENSDARG00000026180	1.37192	0.456196	7.05673	9.02219	0.00266722	0.0052359	15	27598051	27611516	prpf8	pre-mRNA processing factor 8 [Source:ZFIN;Acc:ZDB-GENE-030131-577]
comp14377_c0_seq1	0.398263	ENSDARG00000026198	1.42581	0.511779	4.51277	19.1425	1.21311e-05	3.572e-05	10	5029098	5040851	enoph1	enolase-phosphatase 1 [Source:ZFIN;Acc:ZDB-GENE-040704-73]
comp31453_c0_seq1	0.40417	ENSDARG00000026224	2.1856	1.12803	3.57559	39.815	2.7919e-10	1.52515e-09	25	8655592	8687198	fanci	Fanconi anemia, complementation group I [Source:ZFIN;Acc:ZDB-GENE-030131-2905]
comp31453_c0_seq2	0.824038	ENSDARG00000026224	2.1856	1.12803	3.57559	39.815	2.7919e-10	1.52515e-09	25	8655592	8687198	fanci	Fanconi anemia, complementation group I [Source:ZFIN;Acc:ZDB-GENE-030131-2905]
comp3954_c0_seq1	0.951292	ENSDARG00000026224	2.1856	1.12803	3.57559	39.815	2.7919e-10	1.52515e-09	25	8655592	8687198	fanci	Fanconi anemia, complementation group I [Source:ZFIN;Acc:ZDB-GENE-030131-2905]
comp29107_c0_seq1	2.28526	ENSDARG00000026225	2.59044	1.3732	3.8221	64.4179	1.0064e-15	9.6056e-15	13	12863008	12900008	whsc1	Wolf-Hirschhorn syndrome candidate 1 [Source:ZFIN;Acc:ZDB-GENE-030131-2581]
comp35927_c0_seq1	9.9808	ENSDARG00000026225	2.59044	1.3732	3.8221	64.4179	1.0064e-15	9.6056e-15	13	12863008	12900008	whsc1	Wolf-Hirschhorn syndrome candidate 1 [Source:ZFIN;Acc:ZDB-GENE-030131-2581]
comp35927_c0_seq1	9.9808	ENSDARG00000026225	2.59044	1.3732	3.8221	64.4179	1.0064e-15	9.6056e-15	13	12863008	12900008	whsc1	Wolf-Hirschhorn syndrome candidate 1 [Source:ZFIN;Acc:ZDB-GENE-030131-2581]
comp35927_c0_seq2	7.24297	ENSDARG00000026225	2.59044	1.3732	3.8221	64.4179	1.0064e-15	9.6056e-15	13	12863008	12900008	whsc1	Wolf-Hirschhorn syndrome candidate 1 [Source:ZFIN;Acc:ZDB-GENE-030131-2581]
comp35927_c0_seq2	7.24297	ENSDARG00000026225	2.59044	1.3732	3.8221	64.4179	1.0064e-15	9.6056e-15	13	12863008	12900008	whsc1	Wolf-Hirschhorn syndrome candidate 1 [Source:ZFIN;Acc:ZDB-GENE-030131-2581]
comp35927_c0_seq4	7.7843	ENSDARG00000026225	2.59044	1.3732	3.8221	64.4179	1.0064e-15	9.6056e-15	13	12863008	12900008	whsc1	Wolf-Hirschhorn syndrome candidate 1 [Source:ZFIN;Acc:ZDB-GENE-030131-2581]
comp35927_c0_seq4	7.7843	ENSDARG00000026225	2.59044	1.3732	3.8221	64.4179	1.0064e-15	9.6056e-15	13	12863008	12900008	whsc1	Wolf-Hirschhorn syndrome candidate 1 [Source:ZFIN;Acc:ZDB-GENE-030131-2581]
comp35927_c0_seq5	0.855892	ENSDARG00000026225	2.59044	1.3732	3.8221	64.4179	1.0064e-15	9.6056e-15	13	12863008	12900008	whsc1	Wolf-Hirschhorn syndrome candidate 1 [Source:ZFIN;Acc:ZDB-GENE-030131-2581]
comp35927_c0_seq5	0.855892	ENSDARG00000026225	2.59044	1.3732	3.8221	64.4179	1.0064e-15	9.6056e-15	13	12863008	12900008	whsc1	Wolf-Hirschhorn syndrome candidate 1 [Source:ZFIN;Acc:ZDB-GENE-030131-2581]
comp39805_c0_seq2	0.437687	ENSDARG00000026329	2.40826	1.26799	2.26274	39.5404	3.2134e-10	1.74471e-09	24	29370912	29480215	arhgap29a	Rho GTPase activating protein 29a [Source:ZFIN;Acc:ZDB-GENE-030131-9510]
comp48409_c0_seq1	0.00755688	ENSDARG00000026329	2.40826	1.26799	2.26274	39.5404	3.2134e-10	1.74471e-09	24	29370912	29480215	arhgap29a	Rho GTPase activating protein 29a [Source:ZFIN;Acc:ZDB-GENE-030131-9510]
comp67006_c0_seq1	0.583298	ENSDARG00000026329	2.40826	1.26799	2.26274	39.5404	3.2134e-10	1.74471e-09	24	29370912	29480215	arhgap29a	Rho GTPase activating protein 29a [Source:ZFIN;Acc:ZDB-GENE-030131-9510]
comp14515_c0_seq1	1.94251	ENSDARG00000026400	2.02949	1.02112	1.23872	14.1865	0.00016555	0.00040373	5	62553327	62566190	rad51d	RAD51 homolog D (S. cerevisiae) [Source:ZFIN;Acc:ZDB-GENE-040426-2490]
comp9276_c0_seq1	0.175216	ENSDARG00000026400	2.02949	1.02112	1.23872	14.1865	0.00016555	0.00040373	5	62553327	62566190	rad51d	RAD51 homolog D (S. cerevisiae) [Source:ZFIN;Acc:ZDB-GENE-040426-2490]
comp16208_c0_seq1	1.79248	ENSDARG00000026454	2.67881	1.42159	3.03726	74.6943	5.4955e-18	6.46e-17	5	60690578	60694363	MIS12	MIS12 kinetochore complex component [Source:HGNC Symbol;Acc:HGNC:24967]
comp25636_c0_seq1	0.511578	ENSDARG00000026489	1.54388	0.626565	6.47474	22.6219	1.97227e-06	6.54244e-06	1	55499599	55511646	khsrp	KH-type splicing regulatory protein [Source:ZFIN;Acc:ZDB-GENE-030131-4357]
comp25636_c0_seq1	0.511578	ENSDARG00000026489	1.54388	0.626565	6.47474	22.6219	1.97227e-06	6.54244e-06	1	55499599	55511646	khsrp	KH-type splicing regulatory protein [Source:ZFIN;Acc:ZDB-GENE-030131-4357]
comp25636_c0_seq2	0.306691	ENSDARG00000026489	1.54388	0.626565	6.47474	22.6219	1.97227e-06	6.54244e-06	1	55499599	55511646	khsrp	KH-type splicing regulatory protein [Source:ZFIN;Acc:ZDB-GENE-030131-4357]
comp25636_c0_seq2	0.306691	ENSDARG00000026489	1.54388	0.626565	6.47474	22.6219	1.97227e-06	6.54244e-06	1	55499599	55511646	khsrp	KH-type splicing regulatory protein [Source:ZFIN;Acc:ZDB-GENE-030131-4357]
comp25636_c0_seq3	0.0612992	ENSDARG00000026489	1.54388	0.626565	6.47474	22.6219	1.97227e-06	6.54244e-06	1	55499599	55511646	khsrp	KH-type splicing regulatory protein [Source:ZFIN;Acc:ZDB-GENE-030131-4357]
comp25636_c0_seq3	0.0612992	ENSDARG00000026489	1.54388	0.626565	6.47474	22.6219	1.97227e-06	6.54244e-06	1	55499599	55511646	khsrp	KH-type splicing regulatory protein [Source:ZFIN;Acc:ZDB-GENE-030131-4357]
comp16545_c0_seq1	0.837755	ENSDARG00000026630	1.37064	0.454849	4.54732	16.1239	5.93313e-05	0.00015578	20	43824629	43949452	MARK3 (2 of 3)	MAP/microtubule affinity-regulating kinase 3 [Source:HGNC Symbol;Acc:HGNC:6897]
comp27435_c0_seq1	0.0517623	ENSDARG00000026630	1.37064	0.454849	4.54732	16.1239	5.93313e-05	0.00015578	20	43824629	43949452	MARK3 (2 of 3)	MAP/microtubule affinity-regulating kinase 3 [Source:HGNC Symbol;Acc:HGNC:6897]
comp38467_c0_seq1	1.50135	ENSDARG00000026630	1.37064	0.454849	4.54732	16.1239	5.93313e-05	0.00015578	20	43824629	43949452	MARK3 (2 of 3)	MAP/microtubule affinity-regulating kinase 3 [Source:HGNC Symbol;Acc:HGNC:6897]
comp38467_c0_seq3	0.00756661	ENSDARG00000026630	1.37064	0.454849	4.54732	16.1239	5.93313e-05	0.00015578	20	43824629	43949452	MARK3 (2 of 3)	MAP/microtubule affinity-regulating kinase 3 [Source:HGNC Symbol;Acc:HGNC:6897]
comp38467_c0_seq4	0.121789	ENSDARG00000026630	1.37064	0.454849	4.54732	16.1239	5.93313e-05	0.00015578	20	43824629	43949452	MARK3 (2 of 3)	MAP/microtubule affinity-regulating kinase 3 [Source:HGNC Symbol;Acc:HGNC:6897]
comp4374_c0_seq2	2.42001	ENSDARG00000026701	1.40149	0.486964	3.00635	11.9276	0.0005531	0.00122861	25	3163552	3183812	gtf2h1	general transcription factor II H, polypeptide 1 [Source:ZFIN;Acc:ZDB-GENE-040912-164]
comp6141_c0_seq1	0.486419	ENSDARG00000026701	1.40149	0.486964	3.00635	11.9276	0.0005531	0.00122861	25	3163552	3183812	gtf2h1	general transcription factor II H, polypeptide 1 [Source:ZFIN;Acc:ZDB-GENE-040912-164]
comp32650_c0_seq1	0.120217	ENSDARG00000026709	2.41958	1.27476	4.08068	78.4458	8.2223e-19	1.0425e-17	10	34198947	34279922	bcl7ba	B-cell CLL/lymphoma 7B, a [Source:ZFIN;Acc:ZDB-GENE-040426-2193]
comp38531_c0_seq1	0.897868	ENSDARG00000026709	2.41958	1.27476	4.08068	78.4458	8.2223e-19	1.0425e-17	10	34198947	34279922	bcl7ba	B-cell CLL/lymphoma 7B, a [Source:ZFIN;Acc:ZDB-GENE-040426-2193]
comp38531_c0_seq1	0.897868	ENSDARG00000026709	2.41958	1.27476	4.08068	78.4458	8.2223e-19	1.0425e-17	10	34198947	34279922	bcl7ba	B-cell CLL/lymphoma 7B, a [Source:ZFIN;Acc:ZDB-GENE-040426-2193]
comp41005_c0_seq1	0.739157	ENSDARG00000026736	1.54446	0.627105	1.22679	6.10915	0.0134484	0.0230755	10	13269400	13307621	il11ra	interleukin 11 receptor, alpha [Source:ZFIN;Acc:ZDB-GENE-030131-5942]
comp41005_c0_seq1	0.739157	ENSDARG00000026736	1.54446	0.627105	1.22679	6.10915	0.0134484	0.0230755	10	13269400	13307621	il11ra	interleukin 11 receptor, alpha [Source:ZFIN;Acc:ZDB-GENE-030131-5942]
comp41005_c0_seq10	0.581391	ENSDARG00000026736	1.54446	0.627105	1.22679	6.10915	0.0134484	0.0230755	10	13269400	13307621	il11ra	interleukin 11 receptor, alpha [Source:ZFIN;Acc:ZDB-GENE-030131-5942]
comp41005_c0_seq10	0.581391	ENSDARG00000026736	1.54446	0.627105	1.22679	6.10915	0.0134484	0.0230755	10	13269400	13307621	il11ra	interleukin 11 receptor, alpha [Source:ZFIN;Acc:ZDB-GENE-030131-5942]
comp3295_c0_seq1	2.01628	ENSDARG00000026835	1.53157	0.615015	2.16196	7.76942	0.00531382	0.00987443	16	50639574	50660843	slc25a32b	solute carrier family 25, member 32b [Source:ZFIN;Acc:ZDB-GENE-050306-39]
comp43137_c0_seq1	1.26066	ENSDARG00000026835	1.53157	0.615015	2.16196	7.76942	0.00531382	0.00987443	16	50639574	50660843	slc25a32b	solute carrier family 25, member 32b [Source:ZFIN;Acc:ZDB-GENE-050306-39]
comp27598_c0_seq1	0.208947	ENSDARG00000026908	1.33741	0.419446	8.12393	11.9325	0.00055164	0.00122579	10	3427334	3435132	tmed2	transmembrane emp24 domain trafficking protein 2 [Source:ZFIN;Acc:ZDB-GENE-030131-269]
comp39984_c0_seq1	9.09404	ENSDARG00000026985	2.15089	1.10493	6.19503	72.1778	1.9666e-17	2.1917e-16	11	34434877	34454717	lims1	LIM and senescent cell antigen-like domains 1 [Source:ZFIN;Acc:ZDB-GENE-050522-236]
comp39984_c0_seq4	11.5131	ENSDARG00000026985	2.15089	1.10493	6.19503	72.1778	1.9666e-17	2.1917e-16	11	34434877	34454717	lims1	LIM and senescent cell antigen-like domains 1 [Source:ZFIN;Acc:ZDB-GENE-050522-236]
comp39984_c0_seq6	2.45677	ENSDARG00000026985	2.15089	1.10493	6.19503	72.1778	1.9666e-17	2.1917e-16	11	34434877	34454717	lims1	LIM and senescent cell antigen-like domains 1 [Source:ZFIN;Acc:ZDB-GENE-050522-236]
comp39188_c0_seq1	0.411535	ENSDARG00000027016	1.55187	0.634005	2.60121	7.72358	0.00545044	0.010105	13	6490976	6657735	GBF1 (1 of 2)	golgi brefeldin A resistant guanine nucleotide exchange factor 1 [Source:HGNC Symbol;Acc:HGNC:4181]
comp24243_c0_seq1	0.221848	ENSDARG00000027109	1.22421	0.29185	6.46914	5.62585	0.0176975	0.0296141	5	42743318	42761350	zfr	zinc finger RNA binding protein [Source:ZFIN;Acc:ZDB-GENE-030131-378]
comp37347_c0_seq1	0.506305	ENSDARG00000027199	2.3765	1.24884	5.48818	90.1207	2.2407e-21	3.5764e-20	1	35605159	35637057	smad1	MAD homolog 1 (Drosophila) [Source:ZFIN;Acc:ZDB-GENE-991119-8]
comp32616_c0_seq2	2.68543	ENSDARG00000027310	7.76024	2.9561	6.42392	314.019	2.9087e-70	5.3593e-68	25	32167241	32237786	LSP1	lymphocyte-specific protein 1 [Source:HGNC Symbol;Acc:HGNC:6707]
comp32616_c0_seq4	0.343674	ENSDARG00000027310	7.76024	2.9561	6.42392	314.019	2.9087e-70	5.3593e-68	25	32167241	32237786	LSP1	lymphocyte-specific protein 1 [Source:HGNC Symbol;Acc:HGNC:6707]
comp32616_c0_seq6	1.25579	ENSDARG00000027310	7.76024	2.9561	6.42392	314.019	2.9087e-70	5.3593e-68	25	32167241	32237786	LSP1	lymphocyte-specific protein 1 [Source:HGNC Symbol;Acc:HGNC:6707]
comp32534_c0_seq1	0.263304	ENSDARG00000027353	1.48276	0.568285	4.22042	17.0574	3.62673e-05	9.87735e-05	9	22463648	22493509	zmym2	zinc finger, MYM-type 2 [Source:ZFIN;Acc:ZDB-GENE-030131-2408]
comp37728_c0_seq2	1.91507	ENSDARG00000027353	1.48276	0.568285	4.22042	17.0574	3.62673e-05	9.87735e-05	9	22463648	22493509	zmym2	zinc finger, MYM-type 2 [Source:ZFIN;Acc:ZDB-GENE-030131-2408]
comp37728_c0_seq3	1.82143	ENSDARG00000027353	1.48276	0.568285	4.22042	17.0574	3.62673e-05	9.87735e-05	9	22463648	22493509	zmym2	zinc finger, MYM-type 2 [Source:ZFIN;Acc:ZDB-GENE-030131-2408]
comp37728_c0_seq4	0.600469	ENSDARG00000027353	1.48276	0.568285	4.22042	17.0574	3.62673e-05	9.87735e-05	9	22463648	22493509	zmym2	zinc finger, MYM-type 2 [Source:ZFIN;Acc:ZDB-GENE-030131-2408]
comp38941_c0_seq1	2.16616	ENSDARG00000027353	1.48276	0.568285	4.22042	17.0574	3.62673e-05	9.87735e-05	9	22463648	22493509	zmym2	zinc finger, MYM-type 2 [Source:ZFIN;Acc:ZDB-GENE-030131-2408]
comp38941_c0_seq1	2.16616	ENSDARG00000027353	1.48276	0.568285	4.22042	17.0574	3.62673e-05	9.87735e-05	9	22463648	22493509	zmym2	zinc finger, MYM-type 2 [Source:ZFIN;Acc:ZDB-GENE-030131-2408]
comp17873_c0_seq1	1.85965	ENSDARG00000027381	1.70333	0.768356	1.83424	14.4406	0.00014465	0.00035664	23	44934781	44966494	CCDC171	coiled-coil domain containing 171 [Source:HGNC Symbol;Acc:HGNC:29828]
comp18817_c0_seq1	1.66339	ENSDARG00000027381	1.70333	0.768356	1.83424	14.4406	0.00014465	0.00035664	23	44934781	44966494	CCDC171	coiled-coil domain containing 171 [Source:HGNC Symbol;Acc:HGNC:29828]
comp21173_c0_seq1	1.71194	ENSDARG00000027381	1.70333	0.768356	1.83424	14.4406	0.00014465	0.00035664	23	44934781	44966494	CCDC171	coiled-coil domain containing 171 [Source:HGNC Symbol;Acc:HGNC:29828]
comp4823_c0_seq1	6.36649	ENSDARG00000027381	1.70333	0.768356	1.83424	14.4406	0.00014465	0.00035664	23	44934781	44966494	CCDC171	coiled-coil domain containing 171 [Source:HGNC Symbol;Acc:HGNC:29828]
comp30743_c0_seq1	0.688641	ENSDARG00000027397	1.58375	0.663346	3.24274	10.1987	0.00140537	0.00290659	7	6171587	6218979	vangl2	vang-like 2 (van gogh, Drosophila) [Source:ZFIN;Acc:ZDB-GENE-020507-3]
comp30743_c0_seq1	0.688641	ENSDARG00000027397	1.58375	0.663346	3.24274	10.1987	0.00140537	0.00290659	7	6171587	6218979	vangl2	vang-like 2 (van gogh, Drosophila) [Source:ZFIN;Acc:ZDB-GENE-020507-3]
comp39935_c0_seq14	0.150673	ENSDARG00000027397	1.58375	0.663346	3.24274	10.1987	0.00140537	0.00290659	7	6171587	6218979	vangl2	vang-like 2 (van gogh, Drosophila) [Source:ZFIN;Acc:ZDB-GENE-020507-3]
comp39935_c0_seq15	1.77684	ENSDARG00000027397	1.58375	0.663346	3.24274	10.1987	0.00140537	0.00290659	7	6171587	6218979	vangl2	vang-like 2 (van gogh, Drosophila) [Source:ZFIN;Acc:ZDB-GENE-020507-3]
comp35788_c0_seq1	0.206794	ENSDARG00000027423	3.74916	1.90657	2.20983	56.1054	6.8688e-14	5.4895e-13	18	20662173	20828291	igf1ra	insulin-like growth factor 1a receptor [Source:ZFIN;Acc:ZDB-GENE-020503-1]
comp42722_c0_seq1	0.528677	ENSDARG00000027423	3.74916	1.90657	2.20983	56.1054	6.8688e-14	5.4895e-13	18	20662173	20828291	igf1ra	insulin-like growth factor 1a receptor [Source:ZFIN;Acc:ZDB-GENE-020503-1]
comp37642_c0_seq1	1.40318	ENSDARG00000027590	2.10398	1.07312	6.72979	93.9504	3.2353e-22	5.534e-21	2	22049350	22073010	2015-09-02	septin 2 [Source:ZFIN;Acc:ZDB-GENE-030131-911]
comp41718_c0_seq1	0.743768	ENSDARG00000027649	1.48837	0.573734	5.7996	24.3211	8.15412e-07	2.85697e-06	20	29645728	29659415	cpsf3	cleavage and polyadenylation specific factor 3 [Source:ZFIN;Acc:ZDB-GENE-030131-3275]
comp36989_c0_seq2	4.11183	ENSDARG00000027689	1.44192	0.527993	4.82579	14.4676	0.00014259	0.00035182	3	16307811	16339225	pold1	polymerase (DNA directed), delta 1, catalytic subunit [Source:ZFIN;Acc:ZDB-GENE-060429-1]
comp44970_c0_seq1	0.724836	ENSDARG00000027915	1.23403	0.303381	4.97677	6.22704	0.0125814	0.0217198	24	23348491	23364514	zc2hc1a	zinc finger, C2HC-type containing 1A [Source:ZFIN;Acc:ZDB-GENE-030131-3132]
comp29473_c0_seq1	1.70561	ENSDARG00000027918	2.7089	1.43771	3.5979	57.6064	3.2019e-14	2.6566e-13	16	43241774	43250825	ccne2	cyclin E2 [Source:ZFIN;Acc:ZDB-GENE-030131-9689]
comp21489_c0_seq1	0.726123	ENSDARG00000028056	2.696	1.43082	4.15583	46.5862	8.7673e-12	5.6486e-11	5	69428450	69508909	kntc1	kinetochore associated 1 [Source:ZFIN;Acc:ZDB-GENE-050208-92]
comp4068_c0_seq1	1.32391	ENSDARG00000028056	2.696	1.43082	4.15583	46.5862	8.7673e-12	5.6486e-11	5	69428450	69508909	kntc1	kinetochore associated 1 [Source:ZFIN;Acc:ZDB-GENE-050208-92]
comp45220_c0_seq1	1.01847	ENSDARG00000028056	2.696	1.43082	4.15583	46.5862	8.7673e-12	5.6486e-11	5	69428450	69508909	kntc1	kinetochore associated 1 [Source:ZFIN;Acc:ZDB-GENE-050208-92]
comp45917_c0_seq1	1.10963	ENSDARG00000028056	2.696	1.43082	4.15583	46.5862	8.7673e-12	5.6486e-11	5	69428450	69508909	kntc1	kinetochore associated 1 [Source:ZFIN;Acc:ZDB-GENE-050208-92]
comp57102_c0_seq1	1.89752	ENSDARG00000028056	2.696	1.43082	4.15583	46.5862	8.7673e-12	5.6486e-11	5	69428450	69508909	kntc1	kinetochore associated 1 [Source:ZFIN;Acc:ZDB-GENE-050208-92]
comp35466_c0_seq2	0.116427	ENSDARG00000028071	13.3662	3.74052	6.16805	362.503	8.0257e-81	1.9161e-78	8	53434078	53571387	bmp1a	bone morphogenetic protein 1a [Source:ZFIN;Acc:ZDB-GENE-060818-1]
comp35466_c0_seq2	0.116427	ENSDARG00000028071	13.3662	3.74052	6.16805	362.503	8.0257e-81	1.9161e-78	8	53434078	53571387	bmp1a	bone morphogenetic protein 1a [Source:ZFIN;Acc:ZDB-GENE-060818-1]
comp26359_c0_seq1	0.588128	ENSDARG00000028106	1.73428	0.794333	8.08621	25.8642	3.66291e-07	1.34832e-06	21	10200337	10206102	glrx	glutaredoxin (thioltransferase) [Source:ZFIN;Acc:ZDB-GENE-041010-11]
comp27403_c0_seq1	1.02067	ENSDARG00000028159	3.20901	1.68213	3.84665	136.055	1.9407e-31	6.5925e-30	25	16713139	16793062	tead1a	TEA domain family member 1a [Source:ZFIN;Acc:ZDB-GENE-040426-2101]
comp16638_c0_seq1	0.414647	ENSDARG00000028198	1.32094	0.40157	7.61908	15.5347	8.10038e-05	0.00020801	24	37016939	37028914	ube2v2	ubiquitin-conjugating enzyme E2 variant 2 [Source:ZFIN;Acc:ZDB-GENE-040426-2919]
comp35056_c0_seq1	0.634245	ENSDARG00000028198	1.32094	0.40157	7.61908	15.5347	8.10038e-05	0.00020801	24	37016939	37028914	ube2v2	ubiquitin-conjugating enzyme E2 variant 2 [Source:ZFIN;Acc:ZDB-GENE-040426-2919]
comp35805_c0_seq1	0.509223	ENSDARG00000028201	1.32593	0.407002	4.51053	10.0592	0.00151592	0.00310885	13	12247231	12258905	commd8	COMM domain containing 8 [Source:ZFIN;Acc:ZDB-GENE-061103-124]
comp36148_c0_seq1	1.01871	ENSDARG00000028323	1.33003	0.411458	5.72114	9.38402	0.00218884	0.00436559	5	8967555	9010280	mybbp1a	MYB binding protein (P160) 1a [Source:ZFIN;Acc:ZDB-GENE-030131-9864]
comp36148_c0_seq2	1.45099	ENSDARG00000028323	1.33003	0.411458	5.72114	9.38402	0.00218884	0.00436559	5	8967555	9010280	mybbp1a	MYB binding protein (P160) 1a [Source:ZFIN;Acc:ZDB-GENE-030131-9864]
comp15517_c0_seq1	0.0319648	ENSDARG00000028327	1.88604	0.915362	7.19743	50.8835	9.8016e-13	6.9927e-12	13	36987265	36995484	gmfb	glia maturation factor, beta [Source:ZFIN;Acc:ZDB-GENE-040426-2114]
comp15517_c0_seq2	0.442684	ENSDARG00000028327	1.88604	0.915362	7.19743	50.8835	9.8016e-13	6.9927e-12	13	36987265	36995484	gmfb	glia maturation factor, beta [Source:ZFIN;Acc:ZDB-GENE-040426-2114]
comp20081_c0_seq1	5.67693	ENSDARG00000028442	1.4594	0.54538	2.73631	9.41598	0.00215103	0.00429522	6	41377405	41382708	rsg1	REM2 and RAB-like small GTPase 1 [Source:ZFIN;Acc:ZDB-GENE-040912-80]
comp41924_c0_seq1	0.965166	ENSDARG00000028523	2.15269	1.10614	3.47741	45.8153	1.2994e-11	8.2404e-11	10	11285867	11289030	inip	ints3 and nabp interacting protein [Source:ZFIN;Acc:ZDB-GENE-040426-961]
comp41044_c0_seq3	3.18721	ENSDARG00000028524	1.76555	0.820114	7.09956	12.7004	0.00036558	0.00084186	1	60230505	60263365	col5a3b	collagen, type V, alpha 3b [Source:ZFIN;Acc:ZDB-GENE-110728-4]
comp41044_c0_seq4	0.395268	ENSDARG00000028524	1.76555	0.820114	7.09956	12.7004	0.00036558	0.00084186	1	60230505	60263365	col5a3b	collagen, type V, alpha 3b [Source:ZFIN;Acc:ZDB-GENE-110728-4]
comp36765_c0_seq1	0.982426	ENSDARG00000028539	1.56288	0.644203	5.1701	23.9337	9.97115e-07	3.44659e-06	25	3764503	3801809	morc2	MORC family CW-type zinc finger 2 [Source:ZFIN;Acc:ZDB-GENE-040822-40]
comp37476_c0_seq1	1.56266	ENSDARG00000028676	2.86645	1.51926	5.48776	130.667	2.928e-30	9.1911e-29	25	6351196	6378793	NUAK1 (2 of 2)	NUAK family, SNF1-like kinase, 1 [Source:HGNC Symbol;Acc:HGNC:14311]
comp36929_c0_seq1	0.700226	ENSDARG00000028771	1.34383	0.426352	4.74004	16.2758	5.476e-05	0.00014465	24	37175601	37204029	MAPRE2	microtubule-associated protein, RP/EB family, member 2 [Source:HGNC Symbol;Acc:HGNC:6891]
comp36929_c0_seq1	0.700226	ENSDARG00000028771	1.34383	0.426352	4.74004	16.2758	5.476e-05	0.00014465	24	37175601	37204029	MAPRE2	microtubule-associated protein, RP/EB family, member 2 [Source:HGNC Symbol;Acc:HGNC:6891]
comp39746_c0_seq2	0.852275	ENSDARG00000028842	1.3574	0.440841	2.78677	5.3754	0.0204227	0.0337543	4	59416144	59480047	trim24	tripartite motif-containing 24 [Source:ZFIN;Acc:ZDB-GENE-030131-5913]
comp39746_c0_seq3	0.437957	ENSDARG00000028842	1.3574	0.440841	2.78677	5.3754	0.0204227	0.0337543	4	59416144	59480047	trim24	tripartite motif-containing 24 [Source:ZFIN;Acc:ZDB-GENE-030131-5913]
comp39747_c0_seq1	0.0272761	ENSDARG00000028894	1.75392	0.810583	4.69186	52.5277	4.2421e-13	3.1511e-12	23	16103079	16119777	mrgbp	MRG/MORF4L binding protein [Source:ZFIN;Acc:ZDB-GENE-040426-1698]
comp13077_c0_seq1	0.401535	ENSDARG00000028900	1.67135	0.741016	1.90669	10.7648	0.00103446	0.00218943	21	11329827	11349178	odf2a	outer dense fiber of sperm tails 2a [Source:ZFIN;Acc:ZDB-GENE-091117-46]
comp33075_c0_seq1	0.284353	ENSDARG00000028900	1.67135	0.741016	1.90669	10.7648	0.00103446	0.00218943	21	11329827	11349178	odf2a	outer dense fiber of sperm tails 2a [Source:ZFIN;Acc:ZDB-GENE-091117-46]
comp48625_c0_seq1	1.17361	ENSDARG00000028900	1.67135	0.741016	1.90669	10.7648	0.00103446	0.00218943	21	11329827	11349178	odf2a	outer dense fiber of sperm tails 2a [Source:ZFIN;Acc:ZDB-GENE-091117-46]
comp34318_c0_seq1	0.0978231	ENSDARG00000029058	1.9647	0.974311	7.00818	44.3149	2.7958e-11	1.7121e-10	19	32243949	32252815	rbb4	retinoblastoma binding protein 4 [Source:ZFIN;Acc:ZDB-GENE-030131-445]
comp27218_c0_seq2	1.93773	ENSDARG00000029071	3.4247	1.77598	5.19575	139.87	2.8425e-32	1.0071e-30	4	26378363	26395676	creld2	cysteine-rich with EGF-like domains 2 [Source:ZFIN;Acc:ZDB-GENE-040426-1626]
comp16402_c0_seq1	0.854653	ENSDARG00000029133	1.49995	0.584912	4.06025	17.3787	3.06234e-05	8.43649e-05	1	46902401	46947377	tubgcp3	tubulin, gamma complex associated protein 3 [Source:ZFIN;Acc:ZDB-GENE-030616-538]
comp1860_c0_seq1	4.30815	ENSDARG00000029146	1.64735	0.720147	6.94884	14.4101	0.00014701	0.00036184	23	25739995	25974293	lrp1b	low density lipoprotein receptor-related protein 1b [Source:ZFIN;Acc:ZDB-GENE-030131-7126]
comp37433_c0_seq1	0.1345	ENSDARG00000029146	1.64735	0.720147	6.94884	14.4101	0.00014701	0.00036184	23	25739995	25974293	lrp1b	low density lipoprotein receptor-related protein 1b [Source:ZFIN;Acc:ZDB-GENE-030131-7126]
comp33958_c0_seq1	0.737918	ENSDARG00000029157	1.80405	0.851241	4.04378	29.8045	4.77875e-08	1.98249e-07	20	2528275	2612768	med23	mediator complex subunit 23 [Source:ZFIN;Acc:ZDB-GENE-040724-82]
comp7287_c0_seq1	1.93104	ENSDARG00000029241	2.64192	1.40159	3.59223	57.4113	3.5356e-14	2.9221e-13	12	5391324	5755325	cep55l	centrosomal protein 55 like [Source:ZFIN;Acc:ZDB-GENE-050522-222]
comp26340_c0_seq1	1.54942	ENSDARG00000029252	1.61035	0.687371	6.80852	22.8548	1.74715e-06	5.8414e-06	6	3528714	3540314	ssb	Sjogren syndrome antigen B (autoantigen La) [Source:ZFIN;Acc:ZDB-GENE-030131-223]
comp77960_c0_seq1	1.48377	ENSDARG00000029252	1.61035	0.687371	6.80852	22.8548	1.74715e-06	5.8414e-06	6	3528714	3540314	ssb	Sjogren syndrome antigen B (autoantigen La) [Source:ZFIN;Acc:ZDB-GENE-030131-223]
comp10575_c0_seq1	0.482752	ENSDARG00000029358	1.44213	0.528201	3.89977	13.8868	0.00019415	0.00046775	25	17762426	17776315	e2f4	E2F transcription factor 4 [Source:ZFIN;Acc:ZDB-GENE-040426-2773]
comp36197_c0_seq3	10.1336	ENSDARG00000029358	1.44213	0.528201	3.89977	13.8868	0.00019415	0.00046775	25	17762426	17776315	e2f4	E2F transcription factor 4 [Source:ZFIN;Acc:ZDB-GENE-040426-2773]
comp28982_c0_seq1	1.28914	ENSDARG00000029372	2.2953	1.19869	1.17048	19.849	8.38046e-06	2.526e-05	5	60976757	61084558	rasa4	RAS p21 protein activator 4 [Source:ZFIN;Acc:ZDB-GENE-060526-349]
comp16400_c0_seq2	1.50444	ENSDARG00000029394	1.67409	0.743378	6.81552	39.6841	2.9855e-10	1.62621e-09	3	368680	403830	ilf3b	interleukin enhancer binding factor 3b [Source:ZFIN;Acc:ZDB-GENE-030131-587]
comp16400_c0_seq3	0.915151	ENSDARG00000029394	1.67409	0.743378	6.81552	39.6841	2.9855e-10	1.62621e-09	3	368680	403830	ilf3b	interleukin enhancer binding factor 3b [Source:ZFIN;Acc:ZDB-GENE-030131-587]
comp34079_c0_seq1	0.00208713	ENSDARG00000029600	1.29002	0.367388	2.74912	5.41457	0.0199693	0.0330696	13	8924818	8936861	wdr32	WD repeat domain 32 [Source:ZFIN;Acc:ZDB-GENE-040426-2314]
comp34079_c0_seq2	0.673009	ENSDARG00000029600	1.29002	0.367388	2.74912	5.41457	0.0199693	0.0330696	13	8924818	8936861	wdr32	WD repeat domain 32 [Source:ZFIN;Acc:ZDB-GENE-040426-2314]
comp16742_c0_seq1	0.25776	ENSDARG00000029663	1.3133	0.393202	7.4824	11.6627	0.00063766	0.00140067	13	24626296	24635851	rab1a	RAB1A, member RAS oncogene family [Source:ZFIN;Acc:ZDB-GENE-030616-564]
comp76457_c0_seq1	0.0301205	ENSDARG00000029663	1.3133	0.393202	7.4824	11.6627	0.00063766	0.00140067	13	24626296	24635851	rab1a	RAB1A, member RAS oncogene family [Source:ZFIN;Acc:ZDB-GENE-030616-564]
comp6394_c0_seq1	0.232942	ENSDARG00000029865	1.5958	0.674277	4.59811	25.5822	4.2393e-07	1.54705e-06	8	45039375	45089500	rassf2a	Ras association (RalGDS/AF-6) domain family member 2a [Source:ZFIN;Acc:ZDB-GENE-040912-124]
comp6394_c0_seq1	0.232942	ENSDARG00000029865	1.5958	0.674277	4.59811	25.5822	4.2393e-07	1.54705e-06	8	45039375	45089500	rassf2a	Ras association (RalGDS/AF-6) domain family member 2a [Source:ZFIN;Acc:ZDB-GENE-040912-124]
comp33833_c0_seq1	0.329965	ENSDARG00000029911	1.62862	0.703654	5.23899	31.5686	1.92522e-08	8.39579e-08	3	23720194	23753195	casc3	cancer susceptibility candidate 3 [Source:ZFIN;Acc:ZDB-GENE-040308-2]
comp37525_c0_seq1	0.538574	ENSDARG00000029931	1.7288	0.789768	5.07938	31.7004	1.79888e-08	7.87723e-08	3	53537766	53590050	atp13a	ATPase type 13A [Source:ZFIN;Acc:ZDB-GENE-040426-2804]
comp37833_c0_seq1	0.578301	ENSDARG00000029944	4.32555	2.11288	1.66637	63.5976	1.5262e-15	1.4269e-14	4	16406919	16421290	parpbp	PARP1 binding protein [Source:ZFIN;Acc:ZDB-GENE-060421-5714]
comp39535_c0_seq1	0.00820227	ENSDARG00000029955	2.95544	1.56337	4.65662	63.1464	1.919e-15	1.7814e-14	9	13123342	13142232	glb1l	galactosidase, beta 1-like [Source:ZFIN;Acc:ZDB-GENE-050309-196]
comp39193_c0_seq2	1.44199	ENSDARG00000030020	1.46305	0.548976	3.8749	12.6655	0.00037246	0.00085688	15	34452669	34520655	agfg1a	ArfGAP with FG repeats 1a [Source:ZFIN;Acc:ZDB-GENE-030131-5808]
comp39193_c0_seq5	3.03814	ENSDARG00000030020	1.46305	0.548976	3.8749	12.6655	0.00037246	0.00085688	15	34452669	34520655	agfg1a	ArfGAP with FG repeats 1a [Source:ZFIN;Acc:ZDB-GENE-030131-5808]
comp40821_c0_seq3	11.2189	ENSDARG00000030092	3.56619	1.83438	5.84433	228.758	1.1124e-51	1.0417e-49	20	47841168	47864410	tram2	translocation associated membrane protein 2 [Source:ZFIN;Acc:ZDB-GENE-040426-2024]
comp40666_c0_seq1	1.64488	ENSDARG00000030153	1.22823	0.296585	4.53466	4.97583	0.0257039	0.0415235	4	16739798	16773292	gnptab	N-acetylglucosamine-1-phosphate transferase, alpha and beta subunits [Source:ZFIN;Acc:ZDB-GENE-030131-4714]
comp40666_c0_seq2	0.951865	ENSDARG00000030153	1.22823	0.296585	4.53466	4.97583	0.0257039	0.0415235	4	16739798	16773292	gnptab	N-acetylglucosamine-1-phosphate transferase, alpha and beta subunits [Source:ZFIN;Acc:ZDB-GENE-030131-4714]
comp22832_c0_seq1	0.465815	ENSDARG00000030156	1.45153	0.537573	2.44205	6.66936	0.00980845	0.0173263	24	37800649	37813116	naglu	N-acetylglucosaminidase, alpha [Source:ZFIN;Acc:ZDB-GENE-100726-2]
comp37908_c0_seq1	7.05169	ENSDARG00000030156	1.45153	0.537573	2.44205	6.66936	0.00980845	0.0173263	24	37800649	37813116	naglu	N-acetylglucosaminidase, alpha [Source:ZFIN;Acc:ZDB-GENE-100726-2]
comp37908_c0_seq2	1.01364	ENSDARG00000030156	1.45153	0.537573	2.44205	6.66936	0.00980845	0.0173263	24	37800649	37813116	naglu	N-acetylglucosaminidase, alpha [Source:ZFIN;Acc:ZDB-GENE-100726-2]
comp28722_c0_seq1	0.625109	ENSDARG00000030161	1.86313	0.897731	6.88646	49.3572	2.1335e-12	1.4648e-11	7	60835145	60872376	ppp1r14bb	protein phosphatase 1, regulatory (inhibitor) subunit 14Bb [Source:ZFIN;Acc:ZDB-GENE-030616-595]
comp41911_c0_seq1	0.349818	ENSDARG00000030177	1.78953	0.839584	6.02738	29.4031	5.87847e-08	2.4104e-07	9	23004605	23010015	uchl3	ubiquitin carboxyl-terminal esterase L3 (ubiquitin thiolesterase) [Source:ZFIN;Acc:ZDB-GENE-050522-158]
comp32556_c0_seq1	0.408505	ENSDARG00000030241	1.26192	0.335616	6.0355	8.54104	0.00347228	0.00667482	7	25054643	25061875	vbp1	von Hippel-Lindau binding protein 1 [Source:ZFIN;Acc:ZDB-GENE-050522-494]
comp40312_c0_seq1	0.22406	ENSDARG00000030448	1.62161	0.697426	4.98526	27.029	2.00428e-07	7.66228e-07	2	37201502	37223842	sppl2	signal peptide peptidase-like 2 [Source:ZFIN;Acc:ZDB-GENE-030131-4265]
comp40312_c0_seq3	0.476591	ENSDARG00000030448	1.62161	0.697426	4.98526	27.029	2.00428e-07	7.66228e-07	2	37201502	37223842	sppl2	signal peptide peptidase-like 2 [Source:ZFIN;Acc:ZDB-GENE-030131-4265]
comp32955_c0_seq1	0.563019	ENSDARG00000030465	1.90973	0.933371	6.64657	50.4465	1.2246e-12	8.631e-12	18	14847601	14855177	TMEM263	transmembrane protein 263 [Source:HGNC Symbol;Acc:HGNC:28281]
comp43383_c0_seq1	1.1424	ENSDARG00000030479	2.95545	1.56338	6.59479	168.92	1.2739e-38	6.4459e-37	15	30810617	30814135	hmgb1b	high-mobility group box 1b [Source:ZFIN;Acc:ZDB-GENE-030131-8480]
comp27342_c0_seq1	3.31282	ENSDARG00000030498	2.11024	1.07741	6.55817	78.7248	7.1392e-19	9.1196e-18	10	7778351	7811315	il6st	interleukin 6 signal transducer [Source:ZFIN;Acc:ZDB-GENE-080104-6]
comp27342_c0_seq2	2.602	ENSDARG00000030498	2.11024	1.07741	6.55817	78.7248	7.1392e-19	9.1196e-18	10	7778351	7811315	il6st	interleukin 6 signal transducer [Source:ZFIN;Acc:ZDB-GENE-080104-6]
comp37398_c0_seq1	11.1998	ENSDARG00000030498	2.11024	1.07741	6.55817	78.7248	7.1392e-19	9.1196e-18	10	7778351	7811315	il6st	interleukin 6 signal transducer [Source:ZFIN;Acc:ZDB-GENE-080104-6]
comp37398_c0_seq2	0.0679645	ENSDARG00000030498	2.11024	1.07741	6.55817	78.7248	7.1392e-19	9.1196e-18	10	7778351	7811315	il6st	interleukin 6 signal transducer [Source:ZFIN;Acc:ZDB-GENE-080104-6]
comp37398_c0_seq3	0.703561	ENSDARG00000030498	2.11024	1.07741	6.55817	78.7248	7.1392e-19	9.1196e-18	10	7778351	7811315	il6st	interleukin 6 signal transducer [Source:ZFIN;Acc:ZDB-GENE-080104-6]
comp37398_c0_seq4	10.9392	ENSDARG00000030498	2.11024	1.07741	6.55817	78.7248	7.1392e-19	9.1196e-18	10	7778351	7811315	il6st	interleukin 6 signal transducer [Source:ZFIN;Acc:ZDB-GENE-080104-6]
comp39218_c0_seq10	0.102391	ENSDARG00000030508	1.91483	0.93722	2.2968	13.4453	0.00024562	0.00058254	3	1157070	1165949	CCDC134 (1 of 2)	coiled-coil domain containing 134 [Source:HGNC Symbol;Acc:HGNC:26185]
comp16769_c0_seq1	0.780473	ENSDARG00000030560	1.2779	0.353778	6.40963	6.19931	0.01278	0.022047	3	61617341	61695316	helz	helicase with zinc finger [Source:ZFIN;Acc:ZDB-GENE-040426-2419]
comp16769_c0_seq2	0.531179	ENSDARG00000030560	1.2779	0.353778	6.40963	6.19931	0.01278	0.022047	3	61617341	61695316	helz	helicase with zinc finger [Source:ZFIN;Acc:ZDB-GENE-040426-2419]
comp16769_c0_seq4	0.0450865	ENSDARG00000030560	1.2779	0.353778	6.40963	6.19931	0.01278	0.022047	3	61617341	61695316	helz	helicase with zinc finger [Source:ZFIN;Acc:ZDB-GENE-040426-2419]
comp15682_c0_seq1	1.1287	ENSDARG00000030694	1.88367	0.913548	5.8026	55.0264	1.1892e-13	9.3015e-13	4	5113375	5120584	atp6v1e1b	ATPase, H+ transporting, lysosomal, V1 subunit E isoform 1b [Source:ZFIN;Acc:ZDB-GENE-020419-11]
comp25959_c0_seq1	0.604003	ENSDARG00000030716	1.25081	0.322861	5.67752	8.05064	0.00454875	0.00856446	19	10135518	10145084	ing4	inhibitor of growth family, member 4 [Source:ZFIN;Acc:ZDB-GENE-050522-47]
comp29615_c0_seq1	3.23282	ENSDARG00000030759	5.33775	2.41623	2.69996	91.7812	9.681e-22	1.5886e-20	1	20696018	20716785	melk	maternal embryonic leucine zipper kinase [Source:ZFIN;Acc:ZDB-GENE-990603-5]
comp35629_c0_seq2	0.272833	ENSDARG00000030913	1.52086	0.604891	4.7239	15.5141	8.18941e-05	0.00021014	15	24652665	24698402	cluha	clustered mitochondria (cluA/CLU1) homolog a [Source:ZFIN;Acc:ZDB-GENE-061103-457]
comp35163_c0_seq1	0.857631	ENSDARG00000030932	3.90842	1.96658	2.85521	92.9392	5.3927e-22	9.0775e-21	21	18476689	18510497	fgf10a	fibroblast growth factor 10a [Source:ZFIN;Acc:ZDB-GENE-030715-1]
comp36098_c0_seq1	0.584959	ENSDARG00000030945	1.34784	0.430645	4.56763	9.27292	0.00232566	0.00461673	15	15142162	15196618	si:ch211-259g3.4	si:ch211-259g3.4 [Source:ZFIN;Acc:ZDB-GENE-030131-8118]
comp48565_c0_seq1	0.181378	ENSDARG00000030945	1.34784	0.430645	4.56763	9.27292	0.00232566	0.00461673	15	15142162	15196618	si:ch211-259g3.4	si:ch211-259g3.4 [Source:ZFIN;Acc:ZDB-GENE-030131-8118]
comp48799_c0_seq1	0.754394	ENSDARG00000030945	1.34784	0.430645	4.56763	9.27292	0.00232566	0.00461673	15	15142162	15196618	si:ch211-259g3.4	si:ch211-259g3.4 [Source:ZFIN;Acc:ZDB-GENE-030131-8118]
comp65516_c0_seq1	0.758752	ENSDARG00000030945	1.34784	0.430645	4.56763	9.27292	0.00232566	0.00461673	15	15142162	15196618	si:ch211-259g3.4	si:ch211-259g3.4 [Source:ZFIN;Acc:ZDB-GENE-030131-8118]
comp40340_c0_seq6	0.915745	ENSDARG00000031051	1.52523	0.609025	4.66338	14.1236	0.00017118	0.00041632	3	42549885	42560945	il4r	interleukin 4 receptor [Source:ZFIN;Acc:ZDB-GENE-050227-5]
comp15631_c0_seq1	0.990619	ENSDARG00000031216	1.27674	0.352467	5.69898	9.28106	0.00231536	0.00459735	22	380330	388626	ssu72	SSU72 RNA polymerase II CTD phosphatase homolog (S. cerevisiae) [Source:ZFIN;Acc:ZDB-GENE-040426-1689]
comp21659_c0_seq1	1.89561	ENSDARG00000031222	10.219	3.35318	1.96409	109.91	1.0253e-25	2.3743e-24	8	3251922	3268194	lhx2b	LIM homeobox 2b [Source:ZFIN;Acc:ZDB-GENE-051220-1]
comp32107_c0_seq1	0.714248	ENSDARG00000031222	10.219	3.35318	1.96409	109.91	1.0253e-25	2.3743e-24	8	3251922	3268194	lhx2b	LIM homeobox 2b [Source:ZFIN;Acc:ZDB-GENE-051220-1]
comp42663_c0_seq1	1.04595	ENSDARG00000031222	10.219	3.35318	1.96409	109.91	1.0253e-25	2.3743e-24	8	3251922	3268194	lhx2b	LIM homeobox 2b [Source:ZFIN;Acc:ZDB-GENE-051220-1]
comp11859_c0_seq1	0.367011	ENSDARG00000031302	1.22172	0.288914	6.27175	6.36831	0.0116176	0.0202166	13	28233329	28487470	smap1	stromal membrane-associated protein 1 [Source:ZFIN;Acc:ZDB-GENE-060920-2]
comp36167_c0_seq4	0.457709	ENSDARG00000031337	2.54407	1.34714	3.17255	42.4079	7.409e-11	4.3055e-10	16	22994616	22997433	hoxa10b	homeo box A10b [Source:ZFIN;Acc:ZDB-GENE-990415-97]
comp36167_c0_seq6	9.15878	ENSDARG00000031337	2.54407	1.34714	3.17255	42.4079	7.409e-11	4.3055e-10	16	22994616	22997433	hoxa10b	homeo box A10b [Source:ZFIN;Acc:ZDB-GENE-990415-97]
comp35533_c0_seq3	0.984705	ENSDARG00000031345	1.58856	0.667718	1.46679	6.27823	0.012223	0.0211702	5	45235844	45301512	RTKN (1 of 2)	rhotekin [Source:HGNC Symbol;Acc:HGNC:10466]
comp77658_c0_seq1	2.86195	ENSDARG00000031345	1.58856	0.667718	1.46679	6.27823	0.012223	0.0211702	5	45235844	45301512	RTKN (1 of 2)	rhotekin [Source:HGNC Symbol;Acc:HGNC:10466]
comp40513_c0_seq1	0.609536	ENSDARG00000031434	1.4738	0.559536	5.58323	23.4645	1.27242e-06	4.34417e-06	17	29310772	29330469	rcor1	REST corepressor 1 [Source:ZFIN;Acc:ZDB-GENE-050506-79]
comp30318_c0_seq1	0.157582	ENSDARG00000031435	1.41057	0.496277	9.06731	15.4385	8.52321e-05	0.00021824	1	40656189	40663079	zgc:56493	zgc:56493 [Source:ZFIN;Acc:ZDB-GENE-030131-8581]
comp38518_c0_seq2	1.96508	ENSDARG00000031475	1.39938	0.484792	5.22755	12.9489	0.00032011	0.00074453	21	35344610	35405065	mpp1	membrane protein, palmitoylated 1 [Source:ZFIN;Acc:ZDB-GENE-031113-4]
comp41866_c0_seq1	1.36422	ENSDARG00000031775	1.94984	0.963353	5.82383	61.1854	5.1946e-15	4.6295e-14	16	15424189	15432113	UBE2S	ubiquitin-conjugating enzyme E2S [Source:HGNC Symbol;Acc:HGNC:17895]
comp14839_c0_seq1	0.772696	ENSDARG00000031795	2.25328	1.17203	7.79555	70.8773	3.8014e-17	4.1121e-16	19	31674311	31693035	abcf1	ATP-binding cassette, sub-family F (GCN20), member 1 [Source:ZFIN;Acc:ZDB-GENE-050517-31]
comp38355_c0_seq1	0.374663	ENSDARG00000031795	2.25328	1.17203	7.79555	70.8773	3.8014e-17	4.1121e-16	19	31674311	31693035	abcf1	ATP-binding cassette, sub-family F (GCN20), member 1 [Source:ZFIN;Acc:ZDB-GENE-050517-31]
comp38355_c0_seq2	0.347964	ENSDARG00000031795	2.25328	1.17203	7.79555	70.8773	3.8014e-17	4.1121e-16	19	31674311	31693035	abcf1	ATP-binding cassette, sub-family F (GCN20), member 1 [Source:ZFIN;Acc:ZDB-GENE-050517-31]
comp38355_c0_seq2	0.347964	ENSDARG00000031795	2.25328	1.17203	7.79555	70.8773	3.8014e-17	4.1121e-16	19	31674311	31693035	abcf1	ATP-binding cassette, sub-family F (GCN20), member 1 [Source:ZFIN;Acc:ZDB-GENE-050517-31]
comp45464_c0_seq1	0.132987	ENSDARG00000031886	1.58204	0.661788	2.8584	16.419	5.07749e-05	0.00013503	24	39328648	39404507	ift140	intraflagellar transport 140 homolog (Chlamydomonas) [Source:ZFIN;Acc:ZDB-GENE-040724-165]
comp55474_c0_seq1	0.394676	ENSDARG00000031886	1.58204	0.661788	2.8584	16.419	5.07749e-05	0.00013503	24	39328648	39404507	ift140	intraflagellar transport 140 homolog (Chlamydomonas) [Source:ZFIN;Acc:ZDB-GENE-040724-165]
comp4442_c0_seq1	0.394946	ENSDARG00000031890	1.62224	0.697992	3.22762	17.5879	2.74325e-05	7.63561e-05	25	15630426	15642646	tcp11l1	t-complex 11 (mouse)-like 1 [Source:ZFIN;Acc:ZDB-GENE-050327-11]
comp24749_c0_seq1	2.35892	ENSDARG00000032103	3.15706	1.65858	5.92106	103.615	2.4568e-24	5.1351e-23	18	37609786	37623551	mapk6	mitogen-activated protein kinase 6 [Source:ZFIN;Acc:ZDB-GENE-050420-7]
comp24749_c0_seq1	2.35892	ENSDARG00000032103	3.15706	1.65858	5.92106	103.615	2.4568e-24	5.1351e-23	18	37609786	37623551	mapk6	mitogen-activated protein kinase 6 [Source:ZFIN;Acc:ZDB-GENE-050420-7]
comp44524_c0_seq1	0.764273	ENSDARG00000032114	1.27049	0.345387	4.28301	5.61199	0.017838	0.0298255	20	23433754	23459832	slain2	SLAIN motif family, member 2 [Source:ZFIN;Acc:ZDB-GENE-041014-251]
comp46892_c0_seq1	1.08097	ENSDARG00000032114	1.27049	0.345387	4.28301	5.61199	0.017838	0.0298255	20	23433754	23459832	slain2	SLAIN motif family, member 2 [Source:ZFIN;Acc:ZDB-GENE-041014-251]
comp55407_c0_seq1	2.04096	ENSDARG00000032114	1.27049	0.345387	4.28301	5.61199	0.017838	0.0298255	20	23433754	23459832	slain2	SLAIN motif family, member 2 [Source:ZFIN;Acc:ZDB-GENE-041014-251]
comp40395_c0_seq1	1.23389	ENSDARG00000032161	1.48026	0.565855	5.97643	14.5568	0.000136	0.00033673	11	22239998	22418377	srgap2a	SLIT-ROBO Rho GTPase activating protein 2a [Source:ZFIN;Acc:ZDB-GENE-060915-2]
comp28936_c0_seq1	1.01333	ENSDARG00000032237	1.61938	0.69544	3.6683	27.5535	1.52809e-07	5.9328e-07	20	23462894	23482225	anapc4	anaphase promoting complex subunit 4 [Source:ZFIN;Acc:ZDB-GENE-041212-10]
comp38563_c0_seq1	1.70223	ENSDARG00000032264	3.22924	1.69119	3.58373	70.7291	4.0979e-17	4.4216e-16	11	1516878	1539928	mybl2	myeloblastosis oncogene-like 2 [Source:ZFIN;Acc:ZDB-GENE-041007-1]
comp38563_c0_seq2	1.35552	ENSDARG00000032264	3.22924	1.69119	3.58373	70.7291	4.0979e-17	4.4216e-16	11	1516878	1539928	mybl2	myeloblastosis oncogene-like 2 [Source:ZFIN;Acc:ZDB-GENE-041007-1]
comp25574_c0_seq1	0.552784	ENSDARG00000032535	2.48648	1.3141	4.58866	130.037	4.0228e-30	1.2535e-28	8	46635052	46646147	praf2	PRA1 domain family, member 2 [Source:ZFIN;Acc:ZDB-GENE-050417-190]
comp40726_c0_seq2	9.75477	ENSDARG00000032606	1.21169	0.277021	6.74203	4.70783	0.0300256	0.0478395	21	41734463	41780671	sept8a	septin 8a [Source:ZFIN;Acc:ZDB-GENE-030131-309]
comp40132_c0_seq1	0.223382	ENSDARG00000032743	43.4353	5.4408	1.0773	72.7917	1.4408e-17	1.6282e-16	16	44286648	44290749	SIGLEC15	sialic acid binding Ig-like lectin 15 [Source:HGNC Symbol;Acc:HGNC:27596]
comp40132_c0_seq2	8.82157	ENSDARG00000032743	43.4353	5.4408	1.0773	72.7917	1.4408e-17	1.6282e-16	16	44286648	44290749	SIGLEC15	sialic acid binding Ig-like lectin 15 [Source:HGNC Symbol;Acc:HGNC:27596]
comp40132_c0_seq3	11.7807	ENSDARG00000032743	43.4353	5.4408	1.0773	72.7917	1.4408e-17	1.6282e-16	16	44286648	44290749	SIGLEC15	sialic acid binding Ig-like lectin 15 [Source:HGNC Symbol;Acc:HGNC:27596]
comp40132_c0_seq3	11.7807	ENSDARG00000032743	43.4353	5.4408	1.0773	72.7917	1.4408e-17	1.6282e-16	16	44286648	44290749	SIGLEC15	sialic acid binding Ig-like lectin 15 [Source:HGNC Symbol;Acc:HGNC:27596]
comp40132_c0_seq4	10.953	ENSDARG00000032743	43.4353	5.4408	1.0773	72.7917	1.4408e-17	1.6282e-16	16	44286648	44290749	SIGLEC15	sialic acid binding Ig-like lectin 15 [Source:HGNC Symbol;Acc:HGNC:27596]
comp40132_c0_seq4	10.953	ENSDARG00000032743	43.4353	5.4408	1.0773	72.7917	1.4408e-17	1.6282e-16	16	44286648	44290749	SIGLEC15	sialic acid binding Ig-like lectin 15 [Source:HGNC Symbol;Acc:HGNC:27596]
comp24654_c0_seq1	0.0337405	ENSDARG00000032780	1.42686	0.512849	4.02515	14.9527	0.00011024	0.00027742	12	26624153	26637964	pigf	phosphatidylinositol glycan, class F [Source:ZFIN;Acc:ZDB-GENE-040426-1801]
comp48058_c0_seq1	2.11198	ENSDARG00000033099	2.30642	1.20566	3.43228	39.4598	3.3488e-10	1.81474e-09	7	15272043	15319782	kif7	kinesin family member 7 [Source:ZFIN;Acc:ZDB-GENE-050307-1]
comp49902_c0_seq1	0.630247	ENSDARG00000033099	2.30642	1.20566	3.43228	39.4598	3.3488e-10	1.81474e-09	7	15272043	15319782	kif7	kinesin family member 7 [Source:ZFIN;Acc:ZDB-GENE-050307-1]
comp60429_c0_seq1	5.48831	ENSDARG00000033099	2.30642	1.20566	3.43228	39.4598	3.3488e-10	1.81474e-09	7	15272043	15319782	kif7	kinesin family member 7 [Source:ZFIN;Acc:ZDB-GENE-050307-1]
comp70679_c0_seq1	0.394676	ENSDARG00000033099	2.30642	1.20566	3.43228	39.4598	3.3488e-10	1.81474e-09	7	15272043	15319782	kif7	kinesin family member 7 [Source:ZFIN;Acc:ZDB-GENE-050307-1]
comp77211_c0_seq1	4.30815	ENSDARG00000033099	2.30642	1.20566	3.43228	39.4598	3.3488e-10	1.81474e-09	7	15272043	15319782	kif7	kinesin family member 7 [Source:ZFIN;Acc:ZDB-GENE-050307-1]
comp9676_c0_seq1	1.15883	ENSDARG00000033099	2.30642	1.20566	3.43228	39.4598	3.3488e-10	1.81474e-09	7	15272043	15319782	kif7	kinesin family member 7 [Source:ZFIN;Acc:ZDB-GENE-050307-1]
comp23378_c0_seq1	0.379819	ENSDARG00000033171	1.34897	0.431857	4.48758	11.3659	0.00074806	0.00162069	15	14108999	14116135	trappc6bl	trafficking protein particle complex 6b-like [Source:ZFIN;Acc:ZDB-GENE-040426-1602]
comp40695_c0_seq1	0.480224	ENSDARG00000033184	1.25407	0.326613	6.61577	6.54354	0.0105266	0.0184869	8	27183220	27222058	prkar2aa	protein kinase, cAMP-dependent, regulatory, type II, alpha A [Source:ZFIN;Acc:ZDB-GENE-030131-1007]
comp16381_c0_seq2	0.394676	ENSDARG00000033273	2.36734	1.24326	3.48505	35.9087	2.06779e-09	1.02339e-08	1	20345963	20355665	primpol	primase and polymerase (DNA-directed) [Source:ZFIN;Acc:ZDB-GENE-051113-100]
comp57974_c0_seq1	2.08614	ENSDARG00000033273	2.36734	1.24326	3.48505	35.9087	2.06779e-09	1.02339e-08	1	20345963	20355665	primpol	primase and polymerase (DNA-directed) [Source:ZFIN;Acc:ZDB-GENE-051113-100]
comp35728_c0_seq1	0.973325	ENSDARG00000033307	3.83941	1.94089	6.27733	89.2327	3.51e-21	5.5193e-20	25	24762703	24770209	igf2b	insulin-like growth factor 2b [Source:ZFIN;Acc:ZDB-GENE-030131-2935]
comp34196_c0_seq1	1.89142	ENSDARG00000033327	7.3054	2.86896	5.38986	363.723	4.355e-81	1.0546e-78	13	29352262	29453528	unc5b	unc-5 homolog B (C. elegans) [Source:ZFIN;Acc:ZDB-GENE-041213-1]
comp34196_c0_seq1	1.89142	ENSDARG00000033327	7.3054	2.86896	5.38986	363.723	4.355e-81	1.0546e-78	13	29352262	29453528	unc5b	unc-5 homolog B (C. elegans) [Source:ZFIN;Acc:ZDB-GENE-041213-1]
comp34196_c0_seq1	1.89142	ENSDARG00000033327	7.3054	2.86896	5.38986	363.723	4.355e-81	1.0546e-78	13	29352262	29453528	unc5b	unc-5 homolog B (C. elegans) [Source:ZFIN;Acc:ZDB-GENE-041213-1]
comp39500_c0_seq2	12.9096	ENSDARG00000033327	7.3054	2.86896	5.38986	363.723	4.355e-81	1.0546e-78	13	29352262	29453528	unc5b	unc-5 homolog B (C. elegans) [Source:ZFIN;Acc:ZDB-GENE-041213-1]
comp35810_c0_seq2	0.345076	ENSDARG00000033428	1.23237	0.30143	5.98637	6.08868	0.0136051	0.0233208	2	55427608	55462812	twsg1a	twisted gastrulation homolog 1a (Drosophila) [Source:ZFIN;Acc:ZDB-GENE-010509-2]
comp78235_c0_seq1	0.34565	ENSDARG00000033428	1.23237	0.30143	5.98637	6.08868	0.0136051	0.0233208	2	55427608	55462812	twsg1a	twisted gastrulation homolog 1a (Drosophila) [Source:ZFIN;Acc:ZDB-GENE-010509-2]
comp43544_c0_seq1	0.0366861	ENSDARG00000033451	1.46842	0.554263	2.35516	9.34165	0.00224003	0.00445929	2	30195739	30198041	fam173b	family with sequence similarity 173, member B [Source:ZFIN;Acc:ZDB-GENE-041114-90]
comp39931_c0_seq1	0.75157	ENSDARG00000033589	1.78878	0.838974	2.21779	10.6888	0.00107785	0.00227587	22	38827165	38865579	EPHB3 (2 of 2)	EPH receptor B3 [Source:HGNC Symbol;Acc:HGNC:3394]
comp39931_c0_seq2	2.17759	ENSDARG00000033589	1.78878	0.838974	2.21779	10.6888	0.00107785	0.00227587	22	38827165	38865579	EPHB3 (2 of 2)	EPH receptor B3 [Source:HGNC Symbol;Acc:HGNC:3394]
comp39931_c0_seq4	0.306039	ENSDARG00000033589	1.78878	0.838974	2.21779	10.6888	0.00107785	0.00227587	22	38827165	38865579	EPHB3 (2 of 2)	EPH receptor B3 [Source:HGNC Symbol;Acc:HGNC:3394]
comp39931_c0_seq5	1.69957	ENSDARG00000033589	1.78878	0.838974	2.21779	10.6888	0.00107785	0.00227587	22	38827165	38865579	EPHB3 (2 of 2)	EPH receptor B3 [Source:HGNC Symbol;Acc:HGNC:3394]
comp41222_c2_seq6	0.222239	ENSDARG00000033604	2.79276	1.48169	6.59236	134.55	4.142e-31	1.3903e-29	1	41512453	41522418	lrpap1	low density lipoprotein receptor-related protein associated protein 1 [Source:ZFIN;Acc:ZDB-GENE-030131-5871]
comp40921_c0_seq1	1.70744	ENSDARG00000033616	5.00451	2.32323	6.50784	233.576	9.8966e-53	9.8681e-51	17	24515495	24523355	sepn1	selenoprotein N, 1 [Source:ZFIN;Acc:ZDB-GENE-030327-7]
comp39072_c0_seq2	1.57903	ENSDARG00000033757	2.21318	1.14612	4.49042	52.5966	4.096e-13	3.0479e-12	4	17510172	17520419	ncaph2	non-SMC condensin II complex, subunit H2 [Source:ZFIN;Acc:ZDB-GENE-041210-172]
comp18881_c0_seq1	1.65919	ENSDARG00000033840	2.71363	1.44022	1.34904	23.9779	9.74502e-07	3.37531e-06	15	39191207	39515828	fat3a	FAT atypical cadherin 3a [Source:ZFIN;Acc:ZDB-GENE-060929-1254]
comp35341_c0_seq2	10.4309	ENSDARG00000033855	1.37433	0.458728	5.11725	18.5125	1.688e-05	4.87439e-05	22	12890844	12902643	rqcd1	RCD1 required for cell differentiation1 homolog (S. pombe) [Source:ZFIN;Acc:ZDB-GENE-030131-1558]
comp34753_c0_seq1	1.74343	ENSDARG00000033872	1.48026	0.565847	1.25228	5.09635	0.0239762	0.0389964	7	55106615	55218751	csnk1g1	casein kinase 1, gamma 1 [Source:ZFIN;Acc:ZDB-GENE-041212-63]
comp34753_c0_seq1	1.74343	ENSDARG00000033872	1.48026	0.565847	1.25228	5.09635	0.0239762	0.0389964	7	55106615	55218751	csnk1g1	casein kinase 1, gamma 1 [Source:ZFIN;Acc:ZDB-GENE-041212-63]
comp34753_c0_seq2	0.0751616	ENSDARG00000033872	1.48026	0.565847	1.25228	5.09635	0.0239762	0.0389964	7	55106615	55218751	csnk1g1	casein kinase 1, gamma 1 [Source:ZFIN;Acc:ZDB-GENE-041212-63]
comp34753_c0_seq2	0.0751616	ENSDARG00000033872	1.48026	0.565847	1.25228	5.09635	0.0239762	0.0389964	7	55106615	55218751	csnk1g1	casein kinase 1, gamma 1 [Source:ZFIN;Acc:ZDB-GENE-041212-63]
comp36435_c0_seq1	0.704734	ENSDARG00000033872	1.48026	0.565847	1.25228	5.09635	0.0239762	0.0389964	7	55106615	55218751	csnk1g1	casein kinase 1, gamma 1 [Source:ZFIN;Acc:ZDB-GENE-041212-63]
comp24634_c0_seq1	0.490356	ENSDARG00000033993	1.49409	0.57927	4.02375	17.9638	2.25145e-05	6.36072e-05	6	22335237	22357211	SLC19A1	solute carrier family 19 (folate transporter), member 1 [Source:HGNC Symbol;Acc:HGNC:10937]
comp33090_c0_seq3	0.195653	ENSDARG00000034058	2.88679	1.52947	0.565944	12.0939	0.00050586	0.0011335	15	13442432	13522740	p4ha3	prolyl 4-hydroxylase, alpha polypeptide III [Source:ZFIN;Acc:ZDB-GENE-041010-4]
comp33090_c0_seq5	0.559079	ENSDARG00000034058	2.88679	1.52947	0.565944	12.0939	0.00050586	0.0011335	15	13442432	13522740	p4ha3	prolyl 4-hydroxylase, alpha polypeptide III [Source:ZFIN;Acc:ZDB-GENE-041010-4]
comp33972_c0_seq2	5.99321	ENSDARG00000034117	1.56636	0.647419	6.35095	23.9597	9.83754e-07	3.40527e-06	23	35898744	36015279	rarga	retinoic acid receptor gamma a [Source:ZFIN;Acc:ZDB-GENE-980526-531]
comp28157_c0_seq1	0.620825	ENSDARG00000034146	1.53845	0.621474	3.38221	16.1383	5.88821e-05	0.00015465	20	5115838	5136143	ccnk	cyclin K [Source:ZFIN;Acc:ZDB-GENE-030131-5126]
comp30531_c0_seq1	0.515862	ENSDARG00000034178	1.44865	0.534708	5.15387	22.1971	2.46042e-06	8.04681e-06	19	12520943	12573746	cpsf1	cleavage and polyadenylation specific factor 1 [Source:ZFIN;Acc:ZDB-GENE-040709-2]
comp25031_c0_seq1	0.795458	ENSDARG00000034195	1.26397	0.337967	6.82758	10.6371	0.00110841	0.00233602	19	19676650	19763184	top2b	topoisomerase (DNA) II beta [Source:ZFIN;Acc:ZDB-GENE-041008-136]
comp25031_c0_seq2	1.72915	ENSDARG00000034195	1.26397	0.337967	6.82758	10.6371	0.00110841	0.00233602	19	19676650	19763184	top2b	topoisomerase (DNA) II beta [Source:ZFIN;Acc:ZDB-GENE-041008-136]
comp25031_c0_seq2	1.72915	ENSDARG00000034195	1.26397	0.337967	6.82758	10.6371	0.00110841	0.00233602	19	19676650	19763184	top2b	topoisomerase (DNA) II beta [Source:ZFIN;Acc:ZDB-GENE-041008-136]
comp30477_c0_seq1	2.29315	ENSDARG00000034195	1.26397	0.337967	6.82758	10.6371	0.00110841	0.00233602	19	19676650	19763184	top2b	topoisomerase (DNA) II beta [Source:ZFIN;Acc:ZDB-GENE-041008-136]
comp79235_c0_seq1	1.46356	ENSDARG00000034195	1.26397	0.337967	6.82758	10.6371	0.00110841	0.00233602	19	19676650	19763184	top2b	topoisomerase (DNA) II beta [Source:ZFIN;Acc:ZDB-GENE-041008-136]
comp9736_c0_seq1	1.08386	ENSDARG00000034195	1.26397	0.337967	6.82758	10.6371	0.00110841	0.00233602	19	19676650	19763184	top2b	topoisomerase (DNA) II beta [Source:ZFIN;Acc:ZDB-GENE-041008-136]
comp41873_c0_seq1	0.541079	ENSDARG00000034293	1.86339	0.897932	7.21609	43.6023	4.0236e-11	2.4143e-10	20	20398771	20427737	hif1ab	hypoxia-inducible factor 1, alpha subunit (basic helix-loop-helix transcription factor) b [Source:ZFIN;Acc:ZDB-GENE-040426-706]
comp37387_c0_seq1	0.258289	ENSDARG00000034559	2.42987	1.28088	4.16164	50.8011	1.0222e-12	7.2834e-12	14	36662824	36682461	srpx2	sushi-repeat containing protein, X-linked 2 [Source:ZFIN;Acc:ZDB-GENE-110411-231]
comp37387_c0_seq2	10.322	ENSDARG00000034559	2.42987	1.28088	4.16164	50.8011	1.0222e-12	7.2834e-12	14	36662824	36682461	srpx2	sushi-repeat containing protein, X-linked 2 [Source:ZFIN;Acc:ZDB-GENE-110411-231]
comp37387_c0_seq3	0.579202	ENSDARG00000034559	2.42987	1.28088	4.16164	50.8011	1.0222e-12	7.2834e-12	14	36662824	36682461	srpx2	sushi-repeat containing protein, X-linked 2 [Source:ZFIN;Acc:ZDB-GENE-110411-231]
comp37387_c0_seq4	7.18199	ENSDARG00000034559	2.42987	1.28088	4.16164	50.8011	1.0222e-12	7.2834e-12	14	36662824	36682461	srpx2	sushi-repeat containing protein, X-linked 2 [Source:ZFIN;Acc:ZDB-GENE-110411-231]
comp37428_c0_seq1	1.2324	ENSDARG00000034624	2.71088	1.43876	4.29577	68.2441	1.4446e-16	1.4832e-15	11	416541	425283	nuf2	NUF2, NDC80 kinetochore complex component, homolog [Source:ZFIN;Acc:ZDB-GENE-040426-1121]
comp35894_c0_seq1	1.22169	ENSDARG00000034643	3.15565	1.65794	6.58835	55.9529	7.4227e-14	5.921e-13	16	35969551	36050492	fhl3a	four and a half LIM domains 3a [Source:ZFIN;Acc:ZDB-GENE-030131-4741]
comp35894_c0_seq2	1.28648	ENSDARG00000034643	3.15565	1.65794	6.58835	55.9529	7.4227e-14	5.921e-13	16	35969551	36050492	fhl3a	four and a half LIM domains 3a [Source:ZFIN;Acc:ZDB-GENE-030131-4741]
comp30360_c0_seq1	10.6094	ENSDARG00000034771	2.17012	1.11778	7.14821	63.4916	1.6105e-15	1.5041e-14	16	26035905	26048904	rab13	RAB13, member RAS oncogene family [Source:ZFIN;Acc:ZDB-GENE-030826-30]
comp30360_c0_seq1	10.6094	ENSDARG00000034771	2.17012	1.11778	7.14821	63.4916	1.6105e-15	1.5041e-14	16	26035905	26048904	rab13	RAB13, member RAS oncogene family [Source:ZFIN;Acc:ZDB-GENE-030826-30]
comp30360_c0_seq1	10.6094	ENSDARG00000034771	2.17012	1.11778	7.14821	63.4916	1.6105e-15	1.5041e-14	16	26035905	26048904	rab13	RAB13, member RAS oncogene family [Source:ZFIN;Acc:ZDB-GENE-030826-30]
comp30360_c0_seq2	0.334442	ENSDARG00000034771	2.17012	1.11778	7.14821	63.4916	1.6105e-15	1.5041e-14	16	26035905	26048904	rab13	RAB13, member RAS oncogene family [Source:ZFIN;Acc:ZDB-GENE-030826-30]
comp30360_c0_seq2	0.334442	ENSDARG00000034771	2.17012	1.11778	7.14821	63.4916	1.6105e-15	1.5041e-14	16	26035905	26048904	rab13	RAB13, member RAS oncogene family [Source:ZFIN;Acc:ZDB-GENE-030826-30]
comp30360_c0_seq2	0.334442	ENSDARG00000034771	2.17012	1.11778	7.14821	63.4916	1.6105e-15	1.5041e-14	16	26035905	26048904	rab13	RAB13, member RAS oncogene family [Source:ZFIN;Acc:ZDB-GENE-030826-30]
comp34790_c1_seq1	2.16959	ENSDARG00000034773	2.19062	1.13134	3.89986	37.121	1.11023e-09	5.68396e-09	1	20323105	20345692	ncapd3	non-SMC condensin II complex, subunit D3 [Source:ZFIN;Acc:ZDB-GENE-040426-737]
comp32191_c0_seq1	2.50169	ENSDARG00000034855	1.80166	0.849328	3.72966	27.5501	1.53074e-07	5.94173e-07	7	24149000	24171790	ccnb3	cyclin B3 [Source:ZFIN;Acc:ZDB-GENE-060929-684]
comp15076_c0_seq2	0.347991	ENSDARG00000034885	1.84802	0.885981	3.70912	37.8307	7.7158e-10	4.01812e-09	19	41860536	41866787	bet1	blocked early in transport 1 homolog (S. cerevisiae) [Source:ZFIN;Acc:ZDB-GENE-040625-3]
comp10988_c0_seq1	1.07253	ENSDARG00000034894	3.90878	1.96672	5.85711	193.462	5.5793e-44	3.7679e-42	4	7494280	7627025	wnt5b	wingless-type MMTV integration site family, member 5b [Source:ZFIN;Acc:ZDB-GENE-980526-87]
comp11843_c0_seq1	2.01071	ENSDARG00000034894	3.90878	1.96672	5.85711	193.462	5.5793e-44	3.7679e-42	4	7494280	7627025	wnt5b	wingless-type MMTV integration site family, member 5b [Source:ZFIN;Acc:ZDB-GENE-980526-87]
comp25113_c0_seq1	2.21104	ENSDARG00000034894	3.90878	1.96672	5.85711	193.462	5.5793e-44	3.7679e-42	4	7494280	7627025	wnt5b	wingless-type MMTV integration site family, member 5b [Source:ZFIN;Acc:ZDB-GENE-980526-87]
comp25113_c0_seq2	9.71626	ENSDARG00000034894	3.90878	1.96672	5.85711	193.462	5.5793e-44	3.7679e-42	4	7494280	7627025	wnt5b	wingless-type MMTV integration site family, member 5b [Source:ZFIN;Acc:ZDB-GENE-980526-87]
comp30401_c0_seq1	1.99387	ENSDARG00000034894	3.90878	1.96672	5.85711	193.462	5.5793e-44	3.7679e-42	4	7494280	7627025	wnt5b	wingless-type MMTV integration site family, member 5b [Source:ZFIN;Acc:ZDB-GENE-980526-87]
comp39528_c0_seq1	2.00649	ENSDARG00000034894	3.90878	1.96672	5.85711	193.462	5.5793e-44	3.7679e-42	4	7494280	7627025	wnt5b	wingless-type MMTV integration site family, member 5b [Source:ZFIN;Acc:ZDB-GENE-980526-87]
comp41690_c0_seq1	0.373266	ENSDARG00000034916	1.28389	0.360518	6.1999	9.47327	0.00208487	0.00417195	9	3278943	3310741	hat1	histone acetyltransferase 1 [Source:ZFIN;Acc:ZDB-GENE-040912-99]
comp25758_c0_seq1	1.56306	ENSDARG00000035074	1.31988	0.40041	3.41473	8.61296	0.0033378	0.00643674	11	12869838	12917195	rtel1	regulator of telomere elongation helicase 1 [Source:ZFIN;Acc:ZDB-GENE-050306-11]
comp25758_c0_seq3	7.6998	ENSDARG00000035074	1.31988	0.40041	3.41473	8.61296	0.0033378	0.00643674	11	12869838	12917195	rtel1	regulator of telomere elongation helicase 1 [Source:ZFIN;Acc:ZDB-GENE-050306-11]
comp36676_c0_seq1	1.47622	ENSDARG00000035074	1.31988	0.40041	3.41473	8.61296	0.0033378	0.00643674	11	12869838	12917195	rtel1	regulator of telomere elongation helicase 1 [Source:ZFIN;Acc:ZDB-GENE-050306-11]
comp36676_c0_seq2	2.97981	ENSDARG00000035074	1.31988	0.40041	3.41473	8.61296	0.0033378	0.00643674	11	12869838	12917195	rtel1	regulator of telomere elongation helicase 1 [Source:ZFIN;Acc:ZDB-GENE-050306-11]
comp36676_c0_seq3	0.107723	ENSDARG00000035074	1.31988	0.40041	3.41473	8.61296	0.0033378	0.00643674	11	12869838	12917195	rtel1	regulator of telomere elongation helicase 1 [Source:ZFIN;Acc:ZDB-GENE-050306-11]
comp51329_c0_seq1	1.89752	ENSDARG00000035132	2.01167	1.00839	1.23319	16.6319	4.53824e-05	0.00012161	5	67017646	67132547	rgs3b	regulator of G-protein signaling 3b [Source:ZFIN;Acc:ZDB-GENE-060531-24]
comp66687_c0_seq1	4.70486	ENSDARG00000035132	2.01167	1.00839	1.23319	16.6319	4.53824e-05	0.00012161	5	67017646	67132547	rgs3b	regulator of G-protein signaling 3b [Source:ZFIN;Acc:ZDB-GENE-060531-24]
comp34925_c0_seq1	1.2963	ENSDARG00000035147	1.81782	0.862206	2.4246	23.0005	1.61957e-06	5.43846e-06	5	64537965	64567493	lrwd1	leucine-rich repeats and WD repeat domain containing 1 [Source:ZFIN;Acc:ZDB-GENE-030131-5335]
comp37710_c0_seq1	0.364497	ENSDARG00000035308	1.44768	0.533738	4.63706	18.2959	1.89112e-05	5.40489e-05	16	9660894	9780126	grb10b	growth factor receptor-bound protein 10b [Source:ZFIN;Acc:ZDB-GENE-091020-12]
comp33204_c0_seq1	0.399229	ENSDARG00000035324	1.39007	0.475154	7.333	16.5359	4.77385e-05	0.00012734	5	38499854	38512066	hnrpl	heterogeneous nuclear ribonucleoprotein L [Source:ZFIN;Acc:ZDB-GENE-040426-710]
comp53091_c0_seq1	0.616761	ENSDARG00000035398	1.43924	0.525305	4.62544	8.96848	0.00274677	0.00537341	5	36240218	36256522	enc1	ectodermal-neural cortex 1 [Source:ZFIN;Acc:ZDB-GENE-060531-140]
comp13668_c0_seq1	1.39705	ENSDARG00000035423	2.05058	1.03604	7.9973	50.6289	1.1159e-12	7.8948e-12	8	54975726	54978405	zgc:123194	zgc:123194 [Source:ZFIN;Acc:ZDB-GENE-051113-284]
comp42269_c0_seq1	0.875552	ENSDARG00000035468	3.09316	1.62908	1.02727	27.1228	1.9093e-07	7.31897e-07	5	33417526	33444228	slc25a25b	solute carrier family 25 (mitochondrial carrier; phosphate carrier), member 25b [Source:ZFIN;Acc:ZDB-GENE-060526-340]
comp42269_c0_seq1	0.875552	ENSDARG00000035468	3.09316	1.62908	1.02727	27.1228	1.9093e-07	7.31897e-07	5	33417526	33444228	slc25a25b	solute carrier family 25 (mitochondrial carrier; phosphate carrier), member 25b [Source:ZFIN;Acc:ZDB-GENE-060526-340]
comp25802_c0_seq1	0.272108	ENSDARG00000035535	1.69415	0.760564	5.03242	35.5851	2.44148e-09	1.19854e-08	5	49645427	49751679	rasa1a	RAS p21 protein activator 1a [Source:ZFIN;Acc:ZDB-GENE-030131-4694]
comp35630_c0_seq1	0.700967	ENSDARG00000035565	1.2205	0.287476	4.48875	5.16016	0.0231108	0.0377446	5	26212797	26236804	atp6v0a2b	ATPase, H+ transporting, lysosomal V0 subunit a2b [Source:ZFIN;Acc:ZDB-GENE-060526-4]
comp35092_c0_seq1	0.159599	ENSDARG00000035598	1.29204	0.369654	7.64958	11.0888	0.00086849	0.00186069	5	22102847	22203191	coro1ca	coronin, actin binding protein, 1Ca [Source:ZFIN;Acc:ZDB-GENE-030114-6]
comp9658_c0_seq1	0.492171	ENSDARG00000035631	2.14217	1.09907	5.74805	46.6495	8.4888e-12	5.4754e-11	5	14510877	14518072	sdf2l1	stromal cell-derived factor 2-like 1 [Source:ZFIN;Acc:ZDB-GENE-040808-46]
comp33951_c0_seq1	0.298451	ENSDARG00000035678	1.32241	0.403165	6.7145	8.00056	0.00467629	0.0087773	19	36561489	36565407	zgc:91910	zgc:91910 [Source:ZFIN;Acc:ZDB-GENE-040808-48]
comp39665_c0_seq2	5.27127	ENSDARG00000035695	2.36937	1.24451	2.24016	23.8173	1.05928e-06	3.65252e-06	19	3564002	3572099	scxa	scleraxis homolog A (mouse) [Source:ZFIN;Acc:ZDB-GENE-060503-414]
comp39665_c0_seq2	5.27127	ENSDARG00000035695	2.36937	1.24451	2.24016	23.8173	1.05928e-06	3.65252e-06	19	3564002	3572099	scxa	scleraxis homolog A (mouse) [Source:ZFIN;Acc:ZDB-GENE-060503-414]
comp39665_c0_seq3	0.054564	ENSDARG00000035695	2.36937	1.24451	2.24016	23.8173	1.05928e-06	3.65252e-06	19	3564002	3572099	scxa	scleraxis homolog A (mouse) [Source:ZFIN;Acc:ZDB-GENE-060503-414]
comp39665_c0_seq3	0.054564	ENSDARG00000035695	2.36937	1.24451	2.24016	23.8173	1.05928e-06	3.65252e-06	19	3564002	3572099	scxa	scleraxis homolog A (mouse) [Source:ZFIN;Acc:ZDB-GENE-060503-414]
comp30544_c0_seq1	0.602823	ENSDARG00000035699	1.50046	0.585403	5.50952	23.9799	9.73481e-07	3.37246e-06	8	589315	596309	srp19	signal recognition particle 19 [Source:ZFIN;Acc:ZDB-GENE-040426-2657]
comp40976_c0_seq4	2.4104	ENSDARG00000035706	1.69597	0.762112	3.91449	24.0223	9.52242e-07	3.30564e-06	3	56070269	56180220	DOCK6	dedicator of cytokinesis 6 [Source:HGNC Symbol;Acc:HGNC:19189]
comp40976_c0_seq5	2.47117	ENSDARG00000035706	1.69597	0.762112	3.91449	24.0223	9.52242e-07	3.30564e-06	3	56070269	56180220	DOCK6	dedicator of cytokinesis 6 [Source:HGNC Symbol;Acc:HGNC:19189]
comp40976_c0_seq7	2.87747	ENSDARG00000035706	1.69597	0.762112	3.91449	24.0223	9.52242e-07	3.30564e-06	3	56070269	56180220	DOCK6	dedicator of cytokinesis 6 [Source:HGNC Symbol;Acc:HGNC:19189]
comp40976_c0_seq8	2.03621	ENSDARG00000035706	1.69597	0.762112	3.91449	24.0223	9.52242e-07	3.30564e-06	3	56070269	56180220	DOCK6	dedicator of cytokinesis 6 [Source:HGNC Symbol;Acc:HGNC:19189]
comp37643_c0_seq2	0.970079	ENSDARG00000035747	1.37676	0.461275	4.62207	10.7286	0.00105494	0.00222916	21	39871502	39883631	bod1	biorientation of chromosomes in cell division 1 [Source:ZFIN;Acc:ZDB-GENE-060810-163]
comp37643_c0_seq4	9.70547	ENSDARG00000035747	1.37676	0.461275	4.62207	10.7286	0.00105494	0.00222916	21	39871502	39883631	bod1	biorientation of chromosomes in cell division 1 [Source:ZFIN;Acc:ZDB-GENE-060810-163]
comp37643_c0_seq4	9.70547	ENSDARG00000035747	1.37676	0.461275	4.62207	10.7286	0.00105494	0.00222916	21	39871502	39883631	bod1	biorientation of chromosomes in cell division 1 [Source:ZFIN;Acc:ZDB-GENE-060810-163]
comp45397_c0_seq1	2.44167	ENSDARG00000035747	1.37676	0.461275	4.62207	10.7286	0.00105494	0.00222916	21	39871502	39883631	bod1	biorientation of chromosomes in cell division 1 [Source:ZFIN;Acc:ZDB-GENE-060810-163]
comp30475_c0_seq2	0.0144928	ENSDARG00000035751	1.23164	0.300576	6.95122	5.27837	0.021592	0.0355073	7	66982731	67034993	ipo7	importin 7 [Source:ZFIN;Acc:ZDB-GENE-030131-458]
comp24796_c0_seq1	1.79031	ENSDARG00000035770	2.53727	1.34328	5.27734	92.4328	6.9651e-22	1.1564e-20	6	55261894	55289106	ube2c	ubiquitin-conjugating enzyme E2C [Source:ZFIN;Acc:ZDB-GENE-051030-48]
comp23134_c0_seq1	0.515746	ENSDARG00000035837	2.37007	1.24493	0.974324	18.4939	1.70451e-05	4.91965e-05	12	11491095	11501041	C12H16orf52	chromosome 16 open reading frame 52 [Source:HGNC Symbol;Acc:HGNC:27087]
comp36432_c0_seq2	0.961677	ENSDARG00000035910	1.42478	0.510736	3.41803	13.6695	0.00021796	0.0005221	12	17158557	17173902	ZNF281 (2 of 2)	zinc finger protein 281 [Source:HGNC Symbol;Acc:HGNC:13075]
comp41222_c2_seq3	0.190171	ENSDARG00000035913	1.67527	0.744397	6.78137	13.7066	0.0002137	0.00051237	19	32130104	32140671	yars	tyrosyl-tRNA synthetase [Source:ZFIN;Acc:ZDB-GENE-030425-2]
comp41520_c0_seq1	0.403306	ENSDARG00000035914	1.95998	0.970837	5.42966	63.2381	1.8317e-15	1.7032e-14	10	44591093	44597949	tmem167a	transmembrane protein 167A [Source:ZFIN;Acc:ZDB-GENE-050320-29]
comp56234_c0_seq1	0.805624	ENSDARG00000036036	16.6455	4.05706	9.48915	430.284	1.4093e-95	5.6878e-93	7	40558562	40569729	mdka	midkine-related growth factor [Source:ZFIN;Acc:ZDB-GENE-990621-1]
comp38059_c0_seq2	2.79041	ENSDARG00000036064	1.36153	0.445228	4.51777	11.7468	0.00060948	0.00134382	7	39650851	39656482	cnep1r1	CTD nuclear envelope phosphatase 1 regulatory subunit 1 [Source:ZFIN;Acc:ZDB-GENE-050417-425]
comp26058_c0_seq1	0.719514	ENSDARG00000036065	4.50278	2.17082	4.37821	176.942	2.2544e-40	1.2738e-38	19	27854109	27880861	mgat1b	mannosyl (alpha-1,3-)-glycoprotein beta-1,2-N-acetylglucosaminyltransferase b [Source:ZFIN;Acc:ZDB-GENE-061103-589]
comp26058_c0_seq1	0.719514	ENSDARG00000036065	4.50278	2.17082	4.37821	176.942	2.2544e-40	1.2738e-38	19	27854109	27880861	mgat1b	mannosyl (alpha-1,3-)-glycoprotein beta-1,2-N-acetylglucosaminyltransferase b [Source:ZFIN;Acc:ZDB-GENE-061103-589]
comp26058_c0_seq1	0.719514	ENSDARG00000036065	4.50278	2.17082	4.37821	176.942	2.2544e-40	1.2738e-38	19	27854109	27880861	mgat1b	mannosyl (alpha-1,3-)-glycoprotein beta-1,2-N-acetylglucosaminyltransferase b [Source:ZFIN;Acc:ZDB-GENE-061103-589]
comp26058_c0_seq1	0.719514	ENSDARG00000036065	4.50278	2.17082	4.37821	176.942	2.2544e-40	1.2738e-38	19	27854109	27880861	mgat1b	mannosyl (alpha-1,3-)-glycoprotein beta-1,2-N-acetylglucosaminyltransferase b [Source:ZFIN;Acc:ZDB-GENE-061103-589]
comp11712_c0_seq1	0.0754312	ENSDARG00000036070	1.8289	0.870977	2.67305	24.2195	8.59564e-07	3.00051e-06	19	27820192	27825537	znrd1	zinc ribbon domain containing 1 [Source:ZFIN;Acc:ZDB-GENE-050320-131]
comp36900_c0_seq1	0.0559879	ENSDARG00000036090	1.387	0.471972	5.36162	13.7445	0.00020943	0.00050284	19	26184994	26258645	pard6gb	par-6 partitioning defective 6 homolog gamma B (C. elegans) [Source:ZFIN;Acc:ZDB-GENE-010319-35]
comp31357_c0_seq2	0.788725	ENSDARG00000036100	1.27867	0.354639	2.97937	4.80165	0.0284326	0.0455109	19	25377412	25401185	eya3	eyes absent homolog 3 [Source:ZFIN;Acc:ZDB-GENE-060503-864]
comp31357_c0_seq3	5.67693	ENSDARG00000036100	1.27867	0.354639	2.97937	4.80165	0.0284326	0.0455109	19	25377412	25401185	eya3	eyes absent homolog 3 [Source:ZFIN;Acc:ZDB-GENE-060503-864]
comp40857_c0_seq2	0.951732	ENSDARG00000036164	2.22701	1.15511	6.08722	44.2908	2.8305e-11	1.7321e-10	7	33130745	33165554	cars	cysteinyl-tRNA synthetase [Source:ZFIN;Acc:ZDB-GENE-030328-29]
comp40857_c0_seq4	0.557883	ENSDARG00000036164	2.22701	1.15511	6.08722	44.2908	2.8305e-11	1.7321e-10	7	33130745	33165554	cars	cysteinyl-tRNA synthetase [Source:ZFIN;Acc:ZDB-GENE-030328-29]
comp32697_c0_seq1	3.45536	ENSDARG00000036168	3.25803	1.704	3.37544	46.3868	9.707e-12	6.228e-11	19	22701075	22788831	nfatc1	nuclear factor of activated T-cells, cytoplasmic, calcineurin-dependent 1 [Source:ZFIN;Acc:ZDB-GENE-060503-677]
comp32697_c0_seq2	0.445505	ENSDARG00000036168	3.25803	1.704	3.37544	46.3868	9.707e-12	6.228e-11	19	22701075	22788831	nfatc1	nuclear factor of activated T-cells, cytoplasmic, calcineurin-dependent 1 [Source:ZFIN;Acc:ZDB-GENE-060503-677]
comp32697_c0_seq3	1.962	ENSDARG00000036168	3.25803	1.704	3.37544	46.3868	9.707e-12	6.228e-11	19	22701075	22788831	nfatc1	nuclear factor of activated T-cells, cytoplasmic, calcineurin-dependent 1 [Source:ZFIN;Acc:ZDB-GENE-060503-677]
comp36895_c0_seq1	2.51948	ENSDARG00000036180	6.46664	2.69302	2.12231	111.274	5.152e-26	1.2318e-24	7	31962886	31967624	ccnb2	cyclin B2 [Source:ZFIN;Acc:ZDB-GENE-030429-12]
comp36857_c0_seq1	0.0763174	ENSDARG00000036190	2.2376	1.16195	5.24319	90.5874	1.7698e-21	2.849e-20	19	21275534	21279207	txnl4a	thioredoxin-like 4A [Source:ZFIN;Acc:ZDB-GENE-041010-25]
comp36857_c0_seq2	6.98184	ENSDARG00000036190	2.2376	1.16195	5.24319	90.5874	1.7698e-21	2.849e-20	19	21275534	21279207	txnl4a	thioredoxin-like 4A [Source:ZFIN;Acc:ZDB-GENE-041010-25]
comp39088_c0_seq11	0.435547	ENSDARG00000036282	1.36003	0.443635	6.61247	11.7913	0.00059508	0.0013143	13	9518928	9533752	rnaset2	ribonuclease T2 [Source:ZFIN;Acc:ZDB-GENE-030131-2513]
comp39088_c0_seq3	0.248877	ENSDARG00000036282	1.36003	0.443635	6.61247	11.7913	0.00059508	0.0013143	13	9518928	9533752	rnaset2	ribonuclease T2 [Source:ZFIN;Acc:ZDB-GENE-030131-2513]
comp39088_c0_seq4	2.39298	ENSDARG00000036282	1.36003	0.443635	6.61247	11.7913	0.00059508	0.0013143	13	9518928	9533752	rnaset2	ribonuclease T2 [Source:ZFIN;Acc:ZDB-GENE-030131-2513]
comp39088_c0_seq6	2.09477	ENSDARG00000036282	1.36003	0.443635	6.61247	11.7913	0.00059508	0.0013143	13	9518928	9533752	rnaset2	ribonuclease T2 [Source:ZFIN;Acc:ZDB-GENE-030131-2513]
comp22332_c0_seq1	1.09427	ENSDARG00000036388	3.734	1.90072	6.84542	245.836	2.0997e-55	2.3112e-53	19	18485345	18497749	slc39a7	solute carrier family 39 (zinc transporter), member 7 [Source:ZFIN;Acc:ZDB-GENE-991110-20]
comp34511_c0_seq1	0.115814	ENSDARG00000036541	1.62647	0.701747	5.42642	25.1252	5.37258e-07	1.93561e-06	3	55748003	55844699	rhbdf1	rhomboid 5 homolog 1 (Drosophila) [Source:ZFIN;Acc:ZDB-GENE-040704-75]
comp34511_c0_seq1	0.115814	ENSDARG00000036541	1.62647	0.701747	5.42642	25.1252	5.37258e-07	1.93561e-06	3	55748003	55844699	rhbdf1	rhomboid 5 homolog 1 (Drosophila) [Source:ZFIN;Acc:ZDB-GENE-040704-75]
comp40267_c0_seq2	0.32804	ENSDARG00000036549	1.50016	0.585119	4.61084	19.9072	8.12934e-06	2.45459e-05	1	47334956	47372600	agpat3	1-acylglycerol-3-phosphate O-acyltransferase 3 [Source:ZFIN;Acc:ZDB-GENE-040426-2765]
comp34136_c0_seq1	0.83847	ENSDARG00000036687	1.67445	0.743687	5.31249	22.8304	1.76942e-06	5.90654e-06	1	47828751	47907556	bcl9	B-cell CLL/lymphoma 9 [Source:ZFIN;Acc:ZDB-GENE-090313-135]
comp10803_c0_seq1	0.213743	ENSDARG00000036715	1.61787	0.694099	6.31856	34.1708	5.04796e-09	2.37031e-08	19	11932636	11942505	psmd4a	proteasome (prosome, macropain) 26S subunit, non-ATPase, 4a [Source:ZFIN;Acc:ZDB-GENE-040625-104]
comp43693_c0_seq1	0.815895	ENSDARG00000036755	1.5203	0.604357	2.4512	11.8272	0.00058371	0.00129138	1	36454193	36480262	prmt10	protein arginine methyltransferase 10 (putative) [Source:ZFIN;Acc:ZDB-GENE-080728-4]
comp26212_c0_seq1	0.28489	ENSDARG00000036774	1.22149	0.288641	5.75068	6.26858	0.0122898	0.0212641	1	41582558	41668886	rgs12b	regulator of G-protein signaling 12b [Source:ZFIN;Acc:ZDB-GENE-031006-13]
comp26212_c0_seq1	0.28489	ENSDARG00000036774	1.22149	0.288641	5.75068	6.26858	0.0122898	0.0212641	1	41582558	41668886	rgs12b	regulator of G-protein signaling 12b [Source:ZFIN;Acc:ZDB-GENE-031006-13]
comp26212_c0_seq2	0.829164	ENSDARG00000036774	1.22149	0.288641	5.75068	6.26858	0.0122898	0.0212641	1	41582558	41668886	rgs12b	regulator of G-protein signaling 12b [Source:ZFIN;Acc:ZDB-GENE-031006-13]
comp30608_c0_seq1	1.53947	ENSDARG00000036774	1.22149	0.288641	5.75068	6.26858	0.0122898	0.0212641	1	41582558	41668886	rgs12b	regulator of G-protein signaling 12b [Source:ZFIN;Acc:ZDB-GENE-031006-13]
comp61744_c0_seq1	0.658551	ENSDARG00000036774	1.22149	0.288641	5.75068	6.26858	0.0122898	0.0212641	1	41582558	41668886	rgs12b	regulator of G-protein signaling 12b [Source:ZFIN;Acc:ZDB-GENE-031006-13]
comp63608_c0_seq1	2.77569	ENSDARG00000036774	1.22149	0.288641	5.75068	6.26858	0.0122898	0.0212641	1	41582558	41668886	rgs12b	regulator of G-protein signaling 12b [Source:ZFIN;Acc:ZDB-GENE-031006-13]
comp66902_c0_seq1	0.178862	ENSDARG00000036774	1.22149	0.288641	5.75068	6.26858	0.0122898	0.0212641	1	41582558	41668886	rgs12b	regulator of G-protein signaling 12b [Source:ZFIN;Acc:ZDB-GENE-031006-13]
comp32214_c0_seq1	0.474455	ENSDARG00000036775	1.61233	0.68915	2.21904	11.4965	0.00069729	0.00152082	17	31776302	31778181	dtd2	D-tyrosyl-tRNA deacylase 2 [Source:ZFIN;Acc:ZDB-GENE-040822-45]
comp35136_c0_seq1	0.305243	ENSDARG00000036791	1.39226	0.477425	4.71946	7.05632	0.00789859	0.0141851	23	17182172	17272078	dnmt4	DNA (cytosine-5-)-methyltransferase 4 [Source:ZFIN;Acc:ZDB-GENE-050314-1]
comp35136_c0_seq2	9.12677	ENSDARG00000036791	1.39226	0.477425	4.71946	7.05632	0.00789859	0.0141851	23	17182172	17272078	dnmt4	DNA (cytosine-5-)-methyltransferase 4 [Source:ZFIN;Acc:ZDB-GENE-050314-1]
comp26695_c0_seq1	0.962669	ENSDARG00000036811	2.14344	1.09993	5.38152	81.5411	1.7165e-19	2.3222e-18	8	27263140	27280254	ifrd2	interferon-related developmental regulator 2 [Source:ZFIN;Acc:ZDB-GENE-040801-140]
comp17791_c0_seq1	2.25293	ENSDARG00000036826	1.65075	0.723125	0.166866	4.84104	0.0277901	0.0445646	23	32600664	32629321	ankrd52a	ankyrin repeat domain 52a [Source:ZFIN;Acc:ZDB-GENE-050522-247]
comp17791_c0_seq2	0.826533	ENSDARG00000036826	1.65075	0.723125	0.166866	4.84104	0.0277901	0.0445646	23	32600664	32629321	ankrd52a	ankyrin repeat domain 52a [Source:ZFIN;Acc:ZDB-GENE-050522-247]
comp46317_c0_seq1	0.764051	ENSDARG00000036826	1.65075	0.723125	0.166866	4.84104	0.0277901	0.0445646	23	32600664	32629321	ankrd52a	ankyrin repeat domain 52a [Source:ZFIN;Acc:ZDB-GENE-050522-247]
comp16783_c0_seq1	1.0722	ENSDARG00000036868	1.25616	0.329024	3.78643	5.34145	0.0208242	0.0343711	23	31835020	31843886	tbpl1	TBP-like 1 [Source:ZFIN;Acc:ZDB-GENE-040520-2]
comp32275_c0_seq1	0.799883	ENSDARG00000036903	1.63514	0.709418	1.81775	6.99078	0.00819304	0.0146653	23	31483974	31487531	irak1bp1	interleukin-1 receptor-associated kinase 1 binding protein 1 [Source:ZFIN;Acc:ZDB-GENE-050522-272]
comp37913_c0_seq2	1.15712	ENSDARG00000036929	1.50074	0.585679	4.10367	14.6741	0.00012779	0.00031805	19	181745	187045	rnf139	ring finger protein 139 [Source:ZFIN;Acc:ZDB-GENE-080401-4]
comp31226_c0_seq1	0.0795394	ENSDARG00000036956	1.3172	0.39748	4.29209	6.70086	0.00963665	0.0170459	23	30968700	30991132	asxl1	additional sex combs like 1 (Drosophila) [Source:ZFIN;Acc:ZDB-GENE-091116-9]
comp31226_c0_seq1	0.0795394	ENSDARG00000036956	1.3172	0.39748	4.29209	6.70086	0.00963665	0.0170459	23	30968700	30991132	asxl1	additional sex combs like 1 (Drosophila) [Source:ZFIN;Acc:ZDB-GENE-091116-9]
comp31226_c0_seq2	7.7843	ENSDARG00000036956	1.3172	0.39748	4.29209	6.70086	0.00963665	0.0170459	23	30968700	30991132	asxl1	additional sex combs like 1 (Drosophila) [Source:ZFIN;Acc:ZDB-GENE-091116-9]
comp31226_c0_seq2	7.7843	ENSDARG00000036956	1.3172	0.39748	4.29209	6.70086	0.00963665	0.0170459	23	30968700	30991132	asxl1	additional sex combs like 1 (Drosophila) [Source:ZFIN;Acc:ZDB-GENE-091116-9]
comp48780_c0_seq1	2.26408	ENSDARG00000036956	1.3172	0.39748	4.29209	6.70086	0.00963665	0.0170459	23	30968700	30991132	asxl1	additional sex combs like 1 (Drosophila) [Source:ZFIN;Acc:ZDB-GENE-091116-9]
comp53575_c0_seq1	1.95805	ENSDARG00000036956	1.3172	0.39748	4.29209	6.70086	0.00963665	0.0170459	23	30968700	30991132	asxl1	additional sex combs like 1 (Drosophila) [Source:ZFIN;Acc:ZDB-GENE-091116-9]
comp65396_c0_seq1	1.11407	ENSDARG00000036956	1.3172	0.39748	4.29209	6.70086	0.00963665	0.0170459	23	30968700	30991132	asxl1	additional sex combs like 1 (Drosophila) [Source:ZFIN;Acc:ZDB-GENE-091116-9]
comp65889_c0_seq1	1.74939	ENSDARG00000036956	1.3172	0.39748	4.29209	6.70086	0.00963665	0.0170459	23	30968700	30991132	asxl1	additional sex combs like 1 (Drosophila) [Source:ZFIN;Acc:ZDB-GENE-091116-9]
comp16122_c0_seq1	2.15474	ENSDARG00000036987	4.62588	2.20973	3.4676	98.7609	2.8491e-23	5.3901e-22	16	17749945	17767770	has2	hyaluronan synthase 2 [Source:ZFIN;Acc:ZDB-GENE-020828-1]
comp29483_c0_seq2	8.04624	ENSDARG00000036990	2.31253	1.20947	3.69154	55.2707	1.0502e-13	8.2573e-13	1	40175765	40221985	dctd	dCMP deaminase [Source:ZFIN;Acc:ZDB-GENE-050417-116]
comp25934_c0_seq1	1.90036	ENSDARG00000037020	1.2957	0.373737	4.1678	5.70525	0.0169142	0.0284015	23	29639078	29748537	kif1b	kinesin family member 1B [Source:ZFIN;Acc:ZDB-GENE-030820-1]
comp7951_c0_seq1	0.59942	ENSDARG00000037020	1.2957	0.373737	4.1678	5.70525	0.0169142	0.0284015	23	29639078	29748537	kif1b	kinesin family member 1B [Source:ZFIN;Acc:ZDB-GENE-030820-1]
comp15436_c0_seq1	0.298232	ENSDARG00000037038	1.72657	0.787906	7.14276	42.6482	6.5526e-11	3.8248e-10	20	9944195	9957165	psmc6	proteasome (prosome, macropain) 26S subunit, ATPase, 6 [Source:ZFIN;Acc:ZDB-GENE-030131-304]
comp15436_c0_seq1	0.298232	ENSDARG00000037038	1.72657	0.787906	7.14276	42.6482	6.5526e-11	3.8248e-10	20	9944195	9957165	psmc6	proteasome (prosome, macropain) 26S subunit, ATPase, 6 [Source:ZFIN;Acc:ZDB-GENE-030131-304]
comp32043_c0_seq2	10.2195	ENSDARG00000037042	2.15896	1.11033	1.40911	14.4467	0.00014418	0.0003556	20	9962763	10004641	ddhd1b	DDHD domain containing 1b [Source:ZFIN;Acc:ZDB-GENE-040724-18]
comp28523_c0_seq2	1.41986	ENSDARG00000037100	2.14226	1.09913	3.2371	51.6811	6.5288e-13	4.7518e-12	1	28071591	28094992	ankrd10a	ankyrin repeat domain 10a [Source:ZFIN;Acc:ZDB-GENE-040426-700]
comp28523_c0_seq2	1.41986	ENSDARG00000037100	2.14226	1.09913	3.2371	51.6811	6.5288e-13	4.7518e-12	1	28071591	28094992	ankrd10a	ankyrin repeat domain 10a [Source:ZFIN;Acc:ZDB-GENE-040426-700]
comp28523_c0_seq3	2.08934	ENSDARG00000037100	2.14226	1.09913	3.2371	51.6811	6.5288e-13	4.7518e-12	1	28071591	28094992	ankrd10a	ankyrin repeat domain 10a [Source:ZFIN;Acc:ZDB-GENE-040426-700]
comp28523_c0_seq4	1.33694	ENSDARG00000037100	2.14226	1.09913	3.2371	51.6811	6.5288e-13	4.7518e-12	1	28071591	28094992	ankrd10a	ankyrin repeat domain 10a [Source:ZFIN;Acc:ZDB-GENE-040426-700]
comp33568_c0_seq1	0.592556	ENSDARG00000037109	1.43466	0.520707	4.96337	11.9625	0.00054283	0.00120787	1	27829555	27880976	pwp2h	PWP2 periodic tryptophan protein homolog (yeast) [Source:ZFIN;Acc:ZDB-GENE-021031-3]
comp49921_c0_seq1	0.979333	ENSDARG00000037154	1.40173	0.487204	3.68623	7.35409	0.00669104	0.0121839	16	36738743	36759371	hivep3b	human immunodeficiency virus type I enhancer binding protein 3b [Source:ZFIN;Acc:ZDB-GENE-100922-42]
comp54125_c0_seq1	2.88136	ENSDARG00000037154	1.40173	0.487204	3.68623	7.35409	0.00669104	0.0121839	16	36738743	36759371	hivep3b	human immunodeficiency virus type I enhancer binding protein 3b [Source:ZFIN;Acc:ZDB-GENE-100922-42]
comp66788_c0_seq1	5.67693	ENSDARG00000037154	1.40173	0.487204	3.68623	7.35409	0.00669104	0.0121839	16	36738743	36759371	hivep3b	human immunodeficiency virus type I enhancer binding protein 3b [Source:ZFIN;Acc:ZDB-GENE-100922-42]
comp9277_c0_seq1	3.24031	ENSDARG00000037154	1.40173	0.487204	3.68623	7.35409	0.00669104	0.0121839	16	36738743	36759371	hivep3b	human immunodeficiency virus type I enhancer binding protein 3b [Source:ZFIN;Acc:ZDB-GENE-100922-42]
comp41775_c0_seq1	1.64718	ENSDARG00000037158	1.89204	0.919941	4.95486	35.8951	2.08237e-09	1.03e-08	16	36602962	36612351	rcc1	regulator of chromosome condensation 1 [Source:ZFIN;Acc:ZDB-GENE-040426-2216]
comp29920_c0_seq1	1.64866	ENSDARG00000037177	1.42411	0.510056	6.05089	18.052	2.14947e-05	6.08784e-05	1	28711965	28743147	zc3h13	zinc finger CCCH-type containing 13 [Source:ZFIN;Acc:ZDB-GENE-040426-1619]
comp36737_c0_seq1	1.35209	ENSDARG00000037177	1.42411	0.510056	6.05089	18.052	2.14947e-05	6.08784e-05	1	28711965	28743147	zc3h13	zinc finger CCCH-type containing 13 [Source:ZFIN;Acc:ZDB-GENE-040426-1619]
comp32295_c0_seq2	1.09816	ENSDARG00000037196	2.65294	1.40759	4.37018	95.714	1.3274e-22	2.3659e-21	12	8926219	9140030	ARID5B	AT rich interactive domain 5B (MRF1-like) [Source:HGNC Symbol;Acc:HGNC:17362]
comp68744_c0_seq1	5.84372	ENSDARG00000037196	2.65294	1.40759	4.37018	95.714	1.3274e-22	2.3659e-21	12	8926219	9140030	ARID5B	AT rich interactive domain 5B (MRF1-like) [Source:HGNC Symbol;Acc:HGNC:17362]
comp33049_c0_seq1	0.602144	ENSDARG00000037238	2.18506	1.12767	5.53185	92.0034	8.6528e-22	1.4213e-20	14	27476298	27507294	smad5	MAD homolog 5 (Drosophila) [Source:ZFIN;Acc:ZDB-GENE-990603-9]
comp11363_c0_seq1	0.958666	ENSDARG00000037307	1.98935	0.992301	4.93229	34.7439	3.76054e-09	1.79918e-08	14	24613443	24617934	gnpda1	glucosamine-6-phosphate deaminase 1 [Source:ZFIN;Acc:ZDB-GENE-050417-417]
comp41814_c0_seq1	1.24055	ENSDARG00000037307	1.98935	0.992301	4.93229	34.7439	3.76054e-09	1.79918e-08	14	24613443	24617934	gnpda1	glucosamine-6-phosphate deaminase 1 [Source:ZFIN;Acc:ZDB-GENE-050417-417]
comp81252_c0_seq1	3.75915	ENSDARG00000037324	1.72109	0.783322	1.92821	17.1764	3.4064e-05	9.31321e-05	23	23476179	23508741	klhl17	kelch-like 17 (Drosophila) [Source:ZFIN;Acc:ZDB-GENE-030131-8131]
comp11668_c0_seq1	0.0473876	ENSDARG00000037361	2.17809	1.12306	6.74759	98.0866	4.0048e-23	7.46e-22	12	1179851	1187204	kdelr2b	KDEL (Lys-Asp-Glu-Leu) endoplasmic reticulum protein retention receptor 2b [Source:ZFIN;Acc:ZDB-GENE-030131-4189]
comp30829_c0_seq1	10.0677	ENSDARG00000037362	3.6991	1.88718	2.44254	54.4256	1.6145e-13	1.2519e-12	7	29905552	29947400	scube2	signal peptide, CUB domain, EGF-like 2 [Source:ZFIN;Acc:ZDB-GENE-050302-80]
comp30829_c0_seq2	0.461163	ENSDARG00000037362	3.6991	1.88718	2.44254	54.4256	1.6145e-13	1.2519e-12	7	29905552	29947400	scube2	signal peptide, CUB domain, EGF-like 2 [Source:ZFIN;Acc:ZDB-GENE-050302-80]
comp33221_c0_seq1	1.37852	ENSDARG00000037362	3.6991	1.88718	2.44254	54.4256	1.6145e-13	1.2519e-12	7	29905552	29947400	scube2	signal peptide, CUB domain, EGF-like 2 [Source:ZFIN;Acc:ZDB-GENE-050302-80]
comp33221_c0_seq2	0.927068	ENSDARG00000037362	3.6991	1.88718	2.44254	54.4256	1.6145e-13	1.2519e-12	7	29905552	29947400	scube2	signal peptide, CUB domain, EGF-like 2 [Source:ZFIN;Acc:ZDB-GENE-050302-80]
comp33221_c0_seq3	8.88034	ENSDARG00000037362	3.6991	1.88718	2.44254	54.4256	1.6145e-13	1.2519e-12	7	29905552	29947400	scube2	signal peptide, CUB domain, EGF-like 2 [Source:ZFIN;Acc:ZDB-GENE-050302-80]
comp33221_c0_seq4	3.41379	ENSDARG00000037362	3.6991	1.88718	2.44254	54.4256	1.6145e-13	1.2519e-12	7	29905552	29947400	scube2	signal peptide, CUB domain, EGF-like 2 [Source:ZFIN;Acc:ZDB-GENE-050302-80]
comp35230_c0_seq1	8.01161	ENSDARG00000037363	1.33247	0.414107	5.79273	9.53981	0.00201063	0.00403291	7	29801268	29885677	st5	suppression of tumorigenicity 5 [Source:ZFIN;Acc:ZDB-GENE-030131-2547]
comp8317_c0_seq1	0.34565	ENSDARG00000037363	1.33247	0.414107	5.79273	9.53981	0.00201063	0.00403291	7	29801268	29885677	st5	suppression of tumorigenicity 5 [Source:ZFIN;Acc:ZDB-GENE-030131-2547]
comp11100_c0_seq1	0.403288	ENSDARG00000037371	1.22173	0.288921	5.22134	6.12099	0.0133586	0.0229355	2	7482658	7495864	dcun1d1	DCN1, defective in cullin neddylation 1, domain containing 1 (S. cerevisiae) [Source:ZFIN;Acc:ZDB-GENE-030131-5443]
comp16180_c0_seq1	1.2484	ENSDARG00000037371	1.22173	0.288921	5.22134	6.12099	0.0133586	0.0229355	2	7482658	7495864	dcun1d1	DCN1, defective in cullin neddylation 1, domain containing 1 (S. cerevisiae) [Source:ZFIN;Acc:ZDB-GENE-030131-5443]
comp44499_c0_seq1	0.0538132	ENSDARG00000037406	1.87794	0.909148	3.04602	34.3991	4.48923e-09	2.12087e-08	1	20278502	20321325	wdr19	WD repeat domain 19 [Source:ZFIN;Acc:ZDB-GENE-090313-277]
comp41434_c0_seq1	0.208361	ENSDARG00000037488	1.67084	0.740577	8.64453	23.1591	1.49135e-06	5.03728e-06	14	14115111	14159260	canx	calnexin [Source:ZFIN;Acc:ZDB-GENE-040426-2797]
comp41434_c0_seq1	0.208361	ENSDARG00000037488	1.67084	0.740577	8.64453	23.1591	1.49135e-06	5.03728e-06	14	14115111	14159260	canx	calnexin [Source:ZFIN;Acc:ZDB-GENE-040426-2797]
comp34065_c0_seq1	0.866962	ENSDARG00000037506	1.80812	0.854488	4.94215	49.8791	1.6352e-12	1.1351e-11	14	12335034	12364816	prps1b	phosphoribosyl pyrophosphate synthetase 1B [Source:ZFIN;Acc:ZDB-GENE-030131-4011]
comp34065_c0_seq1	0.866962	ENSDARG00000037506	1.80812	0.854488	4.94215	49.8791	1.6352e-12	1.1351e-11	14	12335034	12364816	prps1b	phosphoribosyl pyrophosphate synthetase 1B [Source:ZFIN;Acc:ZDB-GENE-030131-4011]
comp31487_c0_seq1	0.704292	ENSDARG00000037514	1.29813	0.376432	5.41312	11.4933	0.00069847	0.00152261	14	12437128	12464078	hdac3	histone deacetylase 3 [Source:ZFIN;Acc:ZDB-GENE-040426-847]
comp27389_c0_seq1	1.29446	ENSDARG00000037517	1.23523	0.304778	5.89822	8.78114	0.00304361	0.0059091	23	20719938	20800504	slc35c2	solute carrier family 35, member C2 [Source:ZFIN;Acc:ZDB-GENE-030131-2202]
comp28211_c0_seq1	1.19252	ENSDARG00000037517	1.23523	0.304778	5.89822	8.78114	0.00304361	0.0059091	23	20719938	20800504	slc35c2	solute carrier family 35, member C2 [Source:ZFIN;Acc:ZDB-GENE-030131-2202]
comp35577_c0_seq2	0.449838	ENSDARG00000037559	1.53313	0.616483	8.43562	25.6818	4.02601e-07	1.47493e-06	23	20929034	20953171	uba1	ubiquitin-like modifier activating enzyme 1 [Source:ZFIN;Acc:ZDB-GENE-040426-2009]
comp35577_c0_seq2	0.449838	ENSDARG00000037559	1.53313	0.616483	8.43562	25.6818	4.02601e-07	1.47493e-06	23	20929034	20953171	uba1	ubiquitin-like modifier activating enzyme 1 [Source:ZFIN;Acc:ZDB-GENE-040426-2009]
comp43014_c0_seq1	0.924375	ENSDARG00000037634	1.53924	0.622216	3.4427	16.4403	5.02072e-05	0.00013358	1	11591629	11630714	gne	glucosamine (UDP-N-acetyl)-2-epimerase/N-acetylmannosamine kinase [Source:ZFIN;Acc:ZDB-GENE-040426-1848]
comp41788_c0_seq1	1.40526	ENSDARG00000037640	3.1943	1.6755	4.48674	104.697	1.4233e-24	3.0425e-23	14	2647	7578	aurkb	aurora kinase B [Source:ZFIN;Acc:ZDB-GENE-020419-40]
comp41794_c0_seq1	0.587478	ENSDARG00000037654	1.96782	0.976596	5.15609	23.1476	1.50027e-06	5.06193e-06	1	8936465	8942940	pmm2	phosphomannomutase 2 [Source:ZFIN;Acc:ZDB-GENE-030722-6]
comp38008_c0_seq2	0.0234616	ENSDARG00000037837	1.65515	0.726961	2.23409	12.3922	0.00043113	0.00098002	23	594434	604464	ogfr	opioid growth factor receptor [Source:ZFIN;Acc:ZDB-GENE-030131-377]
comp32979_c0_seq1	1.10869	ENSDARG00000037846	2.56077	1.35658	6.14865	100.36	1.2704e-23	2.4896e-22	23	496639	509600	hm13	histocompatibility (minor) 13 [Source:ZFIN;Acc:ZDB-GENE-020802-3]
comp32979_c0_seq2	1.03694	ENSDARG00000037846	2.56077	1.35658	6.14865	100.36	1.2704e-23	2.4896e-22	23	496639	509600	hm13	histocompatibility (minor) 13 [Source:ZFIN;Acc:ZDB-GENE-020802-3]
comp37925_c0_seq1	9.15853	ENSDARG00000037859	45.4337	5.50569	1.72092	114.931	8.1477e-27	2.0431e-25	16	14359727	14366281	il11a	interleukin 11a [Source:ZFIN;Acc:ZDB-GENE-051019-1]
comp37925_c0_seq2	12.3335	ENSDARG00000037859	45.4337	5.50569	1.72092	114.931	8.1477e-27	2.0431e-25	16	14359727	14366281	il11a	interleukin 11a [Source:ZFIN;Acc:ZDB-GENE-051019-1]
comp41018_c0_seq1	0.234598	ENSDARG00000037883	1.46501	0.550909	4.82248	17.6778	2.61661e-05	7.306e-05	15	10338952	10424397	prcp	prolylcarboxypeptidase (angiotensinase C) [Source:ZFIN;Acc:ZDB-GENE-040718-447]
comp41018_c0_seq2	1.90317	ENSDARG00000037883	1.46501	0.550909	4.82248	17.6778	2.61661e-05	7.306e-05	15	10338952	10424397	prcp	prolylcarboxypeptidase (angiotensinase C) [Source:ZFIN;Acc:ZDB-GENE-040718-447]
comp35102_c0_seq2	0.543497	ENSDARG00000037929	1.48525	0.570704	3.77472	14.4065	0.00014729	0.00036237	3	32034005	32054366	strada	ste20-related kinase adaptor alpha [Source:ZFIN;Acc:ZDB-GENE-030131-6482]
comp28893_c0_seq1	0.501267	ENSDARG00000037961	21.157	4.40306	8.05458	531.249	1.511e-117	1.22e-114	3	32672962	32678048	rcn3	reticulocalbin 3, EF-hand calcium binding domain [Source:ZFIN;Acc:ZDB-GENE-040625-175]
comp28893_c0_seq1	0.501267	ENSDARG00000037961	21.157	4.40306	8.05458	531.249	1.511e-117	1.22e-114	3	32672962	32678048	rcn3	reticulocalbin 3, EF-hand calcium binding domain [Source:ZFIN;Acc:ZDB-GENE-040625-175]
comp28893_c0_seq1	0.501267	ENSDARG00000037961	21.157	4.40306	8.05458	531.249	1.511e-117	1.22e-114	3	32672962	32678048	rcn3	reticulocalbin 3, EF-hand calcium binding domain [Source:ZFIN;Acc:ZDB-GENE-040625-175]
comp26355_c0_seq1	0.355063	ENSDARG00000037962	8.79341	3.13642	6.21855	432.135	5.575e-96	2.3625e-93	21	7841684	7852005	psmb7	proteasome (prosome, macropain) subunit, beta type, 7 [Source:ZFIN;Acc:ZDB-GENE-001208-4]
comp40358_c0_seq2	0.744697	ENSDARG00000037997	27.9052	4.80246	6.95632	487.244	5.669e-108	3.203e-105	16	11935861	11944510	tubb5	tubulin, beta 5 [Source:ZFIN;Acc:ZDB-GENE-031110-4]
comp15999_c0_seq1	2.10243	ENSDARG00000038066	5.78604	2.53258	6.47377	189.004	5.2451e-43	3.3806e-41	3	25471232	25478430	kpna2	karyopherin alpha 2 (RAG cohort 1, importin alpha 1) [Source:ZFIN;Acc:ZDB-GENE-040718-22]
comp76380_c0_seq1	1.83684	ENSDARG00000038066	5.78604	2.53258	6.47377	189.004	5.2451e-43	3.3806e-41	3	25471232	25478430	kpna2	karyopherin alpha 2 (RAG cohort 1, importin alpha 1) [Source:ZFIN;Acc:ZDB-GENE-040718-22]
comp13903_c0_seq1	0.737757	ENSDARG00000038068	1.33682	0.418806	9.69476	7.93208	0.00485659	0.00907953	3	25371128	25376670	ddx5	DEAD (Asp-Glu-Ala-Asp) box polypeptide 5 [Source:ZFIN;Acc:ZDB-GENE-030131-925]
comp19067_c0_seq3	0.764644	ENSDARG00000038068	1.33682	0.418806	9.69476	7.93208	0.00485659	0.00907953	3	25371128	25376670	ddx5	DEAD (Asp-Glu-Ala-Asp) box polypeptide 5 [Source:ZFIN;Acc:ZDB-GENE-030131-925]
comp44165_c0_seq1	0.318872	ENSDARG00000038068	1.33682	0.418806	9.69476	7.93208	0.00485659	0.00907953	3	25371128	25376670	ddx5	DEAD (Asp-Glu-Ala-Asp) box polypeptide 5 [Source:ZFIN;Acc:ZDB-GENE-030131-925]
comp42026_c0_seq1	0.507152	ENSDARG00000038074	1.43332	0.519357	5.657	16.4012	5.12515e-05	0.00013621	6	50344350	50365500	ergic3	ERGIC and golgi 3 [Source:ZFIN;Acc:ZDB-GENE-040426-795]
comp35086_c0_seq2	0.262519	ENSDARG00000038190	1.85761	0.893449	4.69453	24.724	6.61545e-07	2.34648e-06	3	49744850	49772246	ndel1b	nudE nuclear distribution gene E homolog like 1 (A. nidulans) B [Source:ZFIN;Acc:ZDB-GENE-030131-5889]
comp33665_c0_seq1	1.45874	ENSDARG00000038239	1.33175	0.413326	6.42692	13.5968	0.00022657	0.00054071	3	18629422	18661130	tnpo2	transportin 2 (importin 3, karyopherin beta 2b) [Source:ZFIN;Acc:ZDB-GENE-040822-16]
comp43035_c0_seq1	0.631782	ENSDARG00000038239	1.33175	0.413326	6.42692	13.5968	0.00022657	0.00054071	3	18629422	18661130	tnpo2	transportin 2 (importin 3, karyopherin beta 2b) [Source:ZFIN;Acc:ZDB-GENE-040822-16]
comp38038_c0_seq1	0.96598	ENSDARG00000038308	2.35349	1.2348	4.00844	77.7905	1.1457e-18	1.4333e-17	10	2868397	2878128	ykt6	YKT6 v-SNARE homolog (S. cerevisiae) [Source:ZFIN;Acc:ZDB-GENE-040426-733]
comp38038_c0_seq1	0.96598	ENSDARG00000038308	2.35349	1.2348	4.00844	77.7905	1.1457e-18	1.4333e-17	10	2868397	2878128	ykt6	YKT6 v-SNARE homolog (S. cerevisiae) [Source:ZFIN;Acc:ZDB-GENE-040426-733]
comp38038_c0_seq1	0.96598	ENSDARG00000038308	2.35349	1.2348	4.00844	77.7905	1.1457e-18	1.4333e-17	10	2868397	2878128	ykt6	YKT6 v-SNARE homolog (S. cerevisiae) [Source:ZFIN;Acc:ZDB-GENE-040426-733]
comp15977_c0_seq1	0.383284	ENSDARG00000038422	2.22932	1.15661	4.323	43.6873	3.8527e-11	2.3199e-10	8	52614984	52644376	entpd4	ectonucleoside triphosphate diphosphohydrolase 4 [Source:ZFIN;Acc:ZDB-GENE-040718-116]
comp26721_c0_seq2	0.969568	ENSDARG00000038422	2.22932	1.15661	4.323	43.6873	3.8527e-11	2.3199e-10	8	52614984	52644376	entpd4	ectonucleoside triphosphate diphosphohydrolase 4 [Source:ZFIN;Acc:ZDB-GENE-040718-116]
comp39793_c0_seq1	1.01209	ENSDARG00000038428	5.13495	2.36035	6.03547	192.66	8.3521e-44	5.5959e-42	24	20067997	20136956	sulf1	sulfatase 1 [Source:ZFIN;Acc:ZDB-GENE-030131-9242]
comp39793_c0_seq1	1.01209	ENSDARG00000038428	5.13495	2.36035	6.03547	192.66	8.3521e-44	5.5959e-42	24	20067997	20136956	sulf1	sulfatase 1 [Source:ZFIN;Acc:ZDB-GENE-030131-9242]
comp39793_c0_seq1	1.01209	ENSDARG00000038428	5.13495	2.36035	6.03547	192.66	8.3521e-44	5.5959e-42	24	20067997	20136956	sulf1	sulfatase 1 [Source:ZFIN;Acc:ZDB-GENE-030131-9242]
comp35241_c0_seq1	1.5615	ENSDARG00000038442	1.77697	0.829417	5.29047	34.4834	4.29898e-09	2.03724e-08	23	2801266	2882866	plcg1	phospholipase C, gamma 1 [Source:ZFIN;Acc:ZDB-GENE-030421-3]
comp35241_c0_seq4	0.0513193	ENSDARG00000038442	1.77697	0.829417	5.29047	34.4834	4.29898e-09	2.03724e-08	23	2801266	2882866	plcg1	phospholipase C, gamma 1 [Source:ZFIN;Acc:ZDB-GENE-030421-3]
comp27120_c0_seq1	1.72591	ENSDARG00000038500	1.88794	0.916813	0.568826	9.12794	0.00251735	0.00496527	25	18923591	18932569	cep41	centrosomal protein 41 [Source:ZFIN;Acc:ZDB-GENE-040704-35]
comp36212_c0_seq1	1.63474	ENSDARG00000038543	1.56081	0.642297	3.33187	18.1274	2.066e-05	5.877e-05	2	50376130	50404290	wdr48	WD repeat domain 48 [Source:ZFIN;Acc:ZDB-GENE-030131-6622]
comp36212_c0_seq2	0.123028	ENSDARG00000038543	1.56081	0.642297	3.33187	18.1274	2.066e-05	5.877e-05	2	50376130	50404290	wdr48	WD repeat domain 48 [Source:ZFIN;Acc:ZDB-GENE-030131-6622]
comp35313_c0_seq1	1.20821	ENSDARG00000038563	2.32024	1.21428	4.92875	79.0622	6.0186e-19	7.7289e-18	2	48203229	48233581	pitrm1	pitrilysin metalloproteinase 1 [Source:ZFIN;Acc:ZDB-GENE-040426-2876]
comp25068_c0_seq1	0.0373535	ENSDARG00000038635	1.54145	0.624288	6.01151	22.2988	2.33352e-06	7.65838e-06	8	21671325	21673750	magoh	mago-nashi homolog, proliferation-associated (Drosophila) [Source:ZFIN;Acc:ZDB-GENE-041216-1]
comp35807_c0_seq1	0.331537	ENSDARG00000038643	1.87714	0.908534	0.965434	5.01824	0.0250816	0.040615	8	21891896	21907046	alas2	aminolevulinate, delta-, synthetase 2 [Source:ZFIN;Acc:ZDB-GENE-001229-1]
comp19764_c0_seq1	0.777981	ENSDARG00000038664	1.69689	0.762889	2.84819	17.829	2.41667e-05	6.79354e-05	17	734	3743	pole2	polymerase (DNA directed), epsilon 2 [Source:ZFIN;Acc:ZDB-GENE-020419-16]
comp19764_c0_seq2	7.51435	ENSDARG00000038664	1.69689	0.762889	2.84819	17.829	2.41667e-05	6.79354e-05	17	734	3743	pole2	polymerase (DNA directed), epsilon 2 [Source:ZFIN;Acc:ZDB-GENE-020419-16]
comp32861_c0_seq2	0.287576	ENSDARG00000038669	1.71042	0.774348	5.46775	11.7244	0.00061687	0.00135869	2	42106335	42118400	gbp2	guanylate binding protein 2 [Source:ZFIN;Acc:ZDB-GENE-070912-618]
comp40913_c0_seq1	2.16585	ENSDARG00000038669	1.71042	0.774348	5.46775	11.7244	0.00061687	0.00135869	2	42106335	42118400	gbp2	guanylate binding protein 2 [Source:ZFIN;Acc:ZDB-GENE-070912-618]
comp40913_c0_seq6	1.32597	ENSDARG00000038669	1.71042	0.774348	5.46775	11.7244	0.00061687	0.00135869	2	42106335	42118400	gbp2	guanylate binding protein 2 [Source:ZFIN;Acc:ZDB-GENE-070912-618]
comp29596_c0_seq1	0.679472	ENSDARG00000038695	1.55244	0.634535	7.36527	23.8433	1.04505e-06	3.60492e-06	2	36844171	36855031	elavl1	ELAV (embryonic lethal, abnormal vision, Drosophila)-like 1 (Hu antigen R) [Source:ZFIN;Acc:ZDB-GENE-990415-245]
comp29596_c0_seq4	0.632552	ENSDARG00000038695	1.55244	0.634535	7.36527	23.8433	1.04505e-06	3.60492e-06	2	36844171	36855031	elavl1	ELAV (embryonic lethal, abnormal vision, Drosophila)-like 1 (Hu antigen R) [Source:ZFIN;Acc:ZDB-GENE-990415-245]
comp29596_c0_seq5	1.66971	ENSDARG00000038695	1.55244	0.634535	7.36527	23.8433	1.04505e-06	3.60492e-06	2	36844171	36855031	elavl1	ELAV (embryonic lethal, abnormal vision, Drosophila)-like 1 (Hu antigen R) [Source:ZFIN;Acc:ZDB-GENE-990415-245]
comp36925_c0_seq1	0.54815	ENSDARG00000038743	1.5766	0.656814	7.99488	28.6742	8.5638e-08	3.43342e-07	2	38701553	38719326	copb2	coatomer protein complex, subunit beta 2 [Source:ZFIN;Acc:ZDB-GENE-010724-7]
comp36925_c0_seq2	0.405952	ENSDARG00000038743	1.5766	0.656814	7.99488	28.6742	8.5638e-08	3.43342e-07	2	38701553	38719326	copb2	coatomer protein complex, subunit beta 2 [Source:ZFIN;Acc:ZDB-GENE-010724-7]
comp40172_c0_seq2	0.244947	ENSDARG00000038743	1.5766	0.656814	7.99488	28.6742	8.5638e-08	3.43342e-07	2	38701553	38719326	copb2	coatomer protein complex, subunit beta 2 [Source:ZFIN;Acc:ZDB-GENE-010724-7]
comp41898_c0_seq1	0.0276425	ENSDARG00000038743	1.5766	0.656814	7.99488	28.6742	8.5638e-08	3.43342e-07	2	38701553	38719326	copb2	coatomer protein complex, subunit beta 2 [Source:ZFIN;Acc:ZDB-GENE-010724-7]
comp27774_c0_seq1	0.374597	ENSDARG00000038802	2.17706	1.12238	2.27239	30.279	3.74163e-08	1.57225e-07	2	33846613	33856275	cenpl	centromere protein L [Source:ZFIN;Acc:ZDB-GENE-040930-6]
comp53308_c0_seq1	1.27285	ENSDARG00000038812	5.94012	2.57049	0.250993	36.2246	1.75839e-09	8.78471e-09	2	31392512	31402125	e2f5	E2F transcription factor 5 [Source:ZFIN;Acc:ZDB-GENE-030828-3]
comp37849_c0_seq1	1.14676	ENSDARG00000038843	2.72592	1.44674	4.98764	69.0035	9.8287e-17	1.0228e-15	11	43722036	43799988	il17rd	interleukin 17 receptor D [Source:ZFIN;Acc:ZDB-GENE-020320-5]
comp35522_c0_seq1	0.635908	ENSDARG00000038847	1.69093	0.757815	2.6432	16.6074	4.59719e-05	0.00012305	25	13831992	13840785	gins3	GINS complex subunit 3 [Source:ZFIN;Acc:ZDB-GENE-040721-1]
comp35911_c0_seq2	0.941881	ENSDARG00000038866	1.3911	0.476229	4.49022	11.9625	0.00054282	0.00120787	20	6358595	6581574	TRAPPC8	trafficking protein particle complex 8 [Source:HGNC Symbol;Acc:HGNC:29169]
comp50560_c0_seq1	0.181561	ENSDARG00000038879	1.50934	0.59392	3.5093	16.1073	5.98544e-05	0.00015706	15	1489699	1529464	ift80	intraflagellar transport 80 homolog (Chlamydomonas) [Source:ZFIN;Acc:ZDB-GENE-041212-50]
comp51691_c0_seq1	1.07253	ENSDARG00000038879	1.50934	0.59392	3.5093	16.1073	5.98544e-05	0.00015706	15	1489699	1529464	ift80	intraflagellar transport 80 homolog (Chlamydomonas) [Source:ZFIN;Acc:ZDB-GENE-041212-50]
comp61729_c0_seq1	0.757002	ENSDARG00000038879	1.50934	0.59392	3.5093	16.1073	5.98544e-05	0.00015706	15	1489699	1529464	ift80	intraflagellar transport 80 homolog (Chlamydomonas) [Source:ZFIN;Acc:ZDB-GENE-041212-50]
comp63561_c0_seq1	1.68047	ENSDARG00000038879	1.50934	0.59392	3.5093	16.1073	5.98544e-05	0.00015706	15	1489699	1529464	ift80	intraflagellar transport 80 homolog (Chlamydomonas) [Source:ZFIN;Acc:ZDB-GENE-041212-50]
comp23729_c0_seq1	2.05452	ENSDARG00000038882	5.0849	2.34622	4.843	125.979	3.1075e-29	9.0663e-28	15	1529850	1568335	smc4	structural maintenance of chromosomes 4 [Source:ZFIN;Acc:ZDB-GENE-020419-21]
comp32200_c0_seq1	0.838128	ENSDARG00000039004	1.5457	0.628259	2.31277	10.1593	0.00143576	0.00296365	20	53395541	53456590	FIG4 (2 of 2)	FIG4 phosphoinositide 5-phosphatase [Source:HGNC Symbol;Acc:HGNC:16873]
comp39434_c0_seq2	0.361023	ENSDARG00000039005	1.54971	0.631998	4.95436	30.1842	3.92893e-08	1.64483e-07	23	44662350	44666564	trappc1	trafficking protein particle complex 1 [Source:ZFIN;Acc:ZDB-GENE-040718-242]
comp31862_c0_seq1	3.13948	ENSDARG00000039020	3.25813	1.70405	2.71534	69.2572	8.6427e-17	9.0433e-16	13	47400088	47413346	fbxo5	F-box protein 5 [Source:ZFIN;Acc:ZDB-GENE-030131-4027]
comp44453_c0_seq1	1.0027	ENSDARG00000039062	14.498	3.85778	2.59249	207.121	5.8336e-47	4.536e-45	13	41358337	41366557	morn4	MORN repeat containing 4 [Source:ZFIN;Acc:ZDB-GENE-050417-7]
comp29487_c0_seq1	0.671114	ENSDARG00000039125	1.34562	0.428271	6.18879	13.2696	0.00026975	0.00063507	13	37107461	37163320	map4k5	mitogen-activated protein kinase kinase kinase kinase 5 [Source:ZFIN;Acc:ZDB-GENE-030131-6497]
comp29487_c0_seq2	0.182558	ENSDARG00000039125	1.34562	0.428271	6.18879	13.2696	0.00026975	0.00063507	13	37107461	37163320	map4k5	mitogen-activated protein kinase kinase kinase kinase 5 [Source:ZFIN;Acc:ZDB-GENE-030131-6497]
comp38933_c0_seq1	3.29368	ENSDARG00000039133	1.73741	0.796934	3.58534	15.0168	0.00010656	0.00026867	25	32611176	32680965	lamb4	laminin, beta 4 [Source:ZFIN;Acc:ZDB-GENE-021226-2]
comp38933_c0_seq1	3.29368	ENSDARG00000039133	1.73741	0.796934	3.58534	15.0168	0.00010656	0.00026867	25	32611176	32680965	lamb4	laminin, beta 4 [Source:ZFIN;Acc:ZDB-GENE-021226-2]
comp38933_c0_seq2	0.897716	ENSDARG00000039133	1.73741	0.796934	3.58534	15.0168	0.00010656	0.00026867	25	32611176	32680965	lamb4	laminin, beta 4 [Source:ZFIN;Acc:ZDB-GENE-021226-2]
comp38933_c0_seq2	0.897716	ENSDARG00000039133	1.73741	0.796934	3.58534	15.0168	0.00010656	0.00026867	25	32611176	32680965	lamb4	laminin, beta 4 [Source:ZFIN;Acc:ZDB-GENE-021226-2]
comp38933_c0_seq2	0.897716	ENSDARG00000039133	1.73741	0.796934	3.58534	15.0168	0.00010656	0.00026867	25	32611176	32680965	lamb4	laminin, beta 4 [Source:ZFIN;Acc:ZDB-GENE-021226-2]
comp35351_c0_seq1	2.06001	ENSDARG00000039150	1.75907	0.814814	8.88297	24.7654	6.47502e-07	2.29956e-06	13	36441275	36451926	lgmn	legumain [Source:ZFIN;Acc:ZDB-GENE-021030-1]
comp6286_c0_seq2	2.66084	ENSDARG00000039162	1.25583	0.328637	5.92559	9.43318	0.00213094	0.00425812	6	23368320	23379486	rhebl1	Ras homolog enriched in brain like 1 [Source:ZFIN;Acc:ZDB-GENE-000510-1]
comp4899_c0_seq1	0.179609	ENSDARG00000039194	1.30756	0.386877	3.69511	7.69493	0.00553762	0.0102499	19	1424533	1456884	zgc:63863	zgc:63863 [Source:ZFIN;Acc:ZDB-GENE-040426-1278]
comp39050_c0_seq2	1.64803	ENSDARG00000039208	1.58004	0.659961	6.05314	29.9879	4.34754e-08	1.8098e-07	6	33608799	33614433	nasp	nuclear autoantigenic sperm protein (histone-binding) [Source:ZFIN;Acc:ZDB-GENE-030131-5511]
comp39050_c0_seq3	0.270483	ENSDARG00000039208	1.58004	0.659961	6.05314	29.9879	4.34754e-08	1.8098e-07	6	33608799	33614433	nasp	nuclear autoantigenic sperm protein (histone-binding) [Source:ZFIN;Acc:ZDB-GENE-030131-5511]
comp39050_c0_seq4	1.38732	ENSDARG00000039208	1.58004	0.659961	6.05314	29.9879	4.34754e-08	1.8098e-07	6	33608799	33614433	nasp	nuclear autoantigenic sperm protein (histone-binding) [Source:ZFIN;Acc:ZDB-GENE-030131-5511]
comp55004_c0_seq1	1.12016	ENSDARG00000039255	2.36278	1.24048	3.02353	59.6126	1.1549e-14	9.9479e-14	23	25213746	25226487	klhl21	kelch-like 21 (Drosophila) [Source:ZFIN;Acc:ZDB-GENE-040426-2627]
comp58680_c0_seq1	0.0301205	ENSDARG00000039255	2.36278	1.24048	3.02353	59.6126	1.1549e-14	9.9479e-14	23	25213746	25226487	klhl21	kelch-like 21 (Drosophila) [Source:ZFIN;Acc:ZDB-GENE-040426-2627]
comp64466_c0_seq1	0.583298	ENSDARG00000039255	2.36278	1.24048	3.02353	59.6126	1.1549e-14	9.9479e-14	23	25213746	25226487	klhl21	kelch-like 21 (Drosophila) [Source:ZFIN;Acc:ZDB-GENE-040426-2627]
comp73836_c0_seq1	0.583298	ENSDARG00000039255	2.36278	1.24048	3.02353	59.6126	1.1549e-14	9.9479e-14	23	25213746	25226487	klhl21	kelch-like 21 (Drosophila) [Source:ZFIN;Acc:ZDB-GENE-040426-2627]
comp34863_c0_seq1	0.731745	ENSDARG00000039329	5.9865	2.58171	0.293381	37.1101	1.11645e-09	5.7106e-09	6	59396065	59401491	GPR180	G protein-coupled receptor 180 [Source:HGNC Symbol;Acc:HGNC:28899]
comp28950_c0_seq1	9.04351	ENSDARG00000039335	1.37843	0.463022	2.10583	5.2988	0.0213401	0.0351405	9	6120247	6164519	st6gal2a	ST6 beta-galactosamide alpha-2,6-sialyltranferase 2a [Source:ZFIN;Acc:ZDB-GENE-060322-4]
comp28950_c0_seq2	7.24297	ENSDARG00000039335	1.37843	0.463022	2.10583	5.2988	0.0213401	0.0351405	9	6120247	6164519	st6gal2a	ST6 beta-galactosamide alpha-2,6-sialyltranferase 2a [Source:ZFIN;Acc:ZDB-GENE-060322-4]
comp16107_c0_seq1	0.885587	ENSDARG00000039343	1.86167	0.896599	4.63658	50.3015	1.3185e-12	9.2543e-12	4	4898874	4965584	ahcyl2	S-adenosylhomocysteine hydrolase-like 2 [Source:ZFIN;Acc:ZDB-GENE-040115-5]
comp34887_c0_seq1	0.182276	ENSDARG00000039350	1.38556	0.470467	4.28737	12.2489	0.00046552	0.00105088	4	4625871	4629598	ssbp1	single-stranded DNA binding protein 1 [Source:ZFIN;Acc:ZDB-GENE-050417-340]
comp32343_c0_seq1	0.878711	ENSDARG00000039378	2.16419	1.11382	3.93082	39.6706	3.0062e-10	1.63642e-09	18	26911781	26922307	rcn2	reticulocalbin 2 [Source:ZFIN;Acc:ZDB-GENE-050706-62]
comp40818_c0_seq24	0.769403	ENSDARG00000039384	1.39522	0.48049	4.17157	6.30663	0.0120287	0.0208678	5	9996493	10090568	gak	cyclin G associated kinase [Source:ZFIN;Acc:ZDB-GENE-041210-358]
comp25112_c0_seq1	0.272496	ENSDARG00000039424	1.80492	0.851932	4.98544	36.5978	1.45196e-09	7.32503e-09	1	52196039	52204292	snrpb2	small nuclear ribonucleoprotein polypeptide B2 [Source:ZFIN;Acc:ZDB-GENE-060616-2]
comp41139_c0_seq14	10.5198	ENSDARG00000039601	1.41588	0.501702	5.84958	12.8846	0.00033129	0.00076864	10	14571358	14574196	ier3ip1	immediate early response 3 interacting protein 1 [Source:ZFIN;Acc:ZDB-GENE-050506-106]
comp41139_c0_seq5	4.15352	ENSDARG00000039601	1.41588	0.501702	5.84958	12.8846	0.00033129	0.00076864	10	14571358	14574196	ier3ip1	immediate early response 3 interacting protein 1 [Source:ZFIN;Acc:ZDB-GENE-050506-106]
comp41139_c0_seq6	9.32313	ENSDARG00000039601	1.41588	0.501702	5.84958	12.8846	0.00033129	0.00076864	10	14571358	14574196	ier3ip1	immediate early response 3 interacting protein 1 [Source:ZFIN;Acc:ZDB-GENE-050506-106]
comp7344_c0_seq1	0.99826	ENSDARG00000039616	3.02099	1.59502	3.1617	67.0851	2.6003e-16	2.6206e-15	1	30962711	30970084	cenpk	centromere protein K [Source:ZFIN;Acc:ZDB-GENE-090313-204]
comp29984_c0_seq1	0.634363	ENSDARG00000039661	1.32613	0.407221	4.19015	7.16051	0.0074526	0.0134464	15	39695979	39760924	slc36a4	solute carrier family 36 (proton/amino acid symporter), member 4 [Source:ZFIN;Acc:ZDB-GENE-050309-239]
comp28708_c0_seq2	1.55778	ENSDARG00000039671	1.53909	0.62208	2.10523	8.64536	0.00327896	0.00633192	24	31321583	31343620	alg14	asparagine-linked glycosylation 14 homolog (S. cerevisiae) [Source:ZFIN;Acc:ZDB-GENE-041010-195]
comp17549_c0_seq1	1.41037	ENSDARG00000039729	1.354	0.437226	2.85774	7.1383	0.00754546	0.0136024	24	10673654	10823570	asap1b	ArfGAP with SH3 domain, ankyrin repeat and PH domain 1b [Source:ZFIN;Acc:ZDB-GENE-091112-16]
comp17549_c0_seq2	1.70075	ENSDARG00000039729	1.354	0.437226	2.85774	7.1383	0.00754546	0.0136024	24	10673654	10823570	asap1b	ArfGAP with SH3 domain, ankyrin repeat and PH domain 1b [Source:ZFIN;Acc:ZDB-GENE-091112-16]
comp34797_c0_seq1	0.757442	ENSDARG00000039729	1.354	0.437226	2.85774	7.1383	0.00754546	0.0136024	24	10673654	10823570	asap1b	ArfGAP with SH3 domain, ankyrin repeat and PH domain 1b [Source:ZFIN;Acc:ZDB-GENE-091112-16]
comp53653_c0_seq1	1.03502	ENSDARG00000039729	1.354	0.437226	2.85774	7.1383	0.00754546	0.0136024	24	10673654	10823570	asap1b	ArfGAP with SH3 domain, ankyrin repeat and PH domain 1b [Source:ZFIN;Acc:ZDB-GENE-091112-16]
comp40442_c0_seq1	1.25493	ENSDARG00000039757	3.10106	1.63276	4.82106	176.919	2.2806e-40	1.2844e-38	13	8047095	8056317	mcfd2	multiple coagulation factor deficiency 2 [Source:ZFIN;Acc:ZDB-GENE-041010-8]
comp29389_c0_seq1	0.872744	ENSDARG00000039880	1.59348	0.67218	5.67888	41.2624	1.331e-10	7.5283e-10	25	7917286	7926992	arpp19b	cAMP-regulated phosphoprotein 19b [Source:ZFIN;Acc:ZDB-GENE-040426-930]
comp24295_c0_seq1	0.967508	ENSDARG00000039882	1.38628	0.471214	4.41154	10.2807	0.00134429	0.00279048	25	10975095	11016611	ap3s2	adaptor-related protein complex 3, sigma 2 subunit [Source:ZFIN;Acc:ZDB-GENE-040718-274]
comp38671_c0_seq2	0.690843	ENSDARG00000039969	1.19893	0.261747	5.61394	5.23333	0.0221581	0.0363216	16	35434921	35454241	akirin1	akirin 1 [Source:ZFIN;Acc:ZDB-GENE-040426-2178]
comp35621_c0_seq1	3.50125	ENSDARG00000039974	3.03579	1.60207	4.99684	178.439	1.0621e-40	6.0616e-39	21	18375725	18436384	rai14	retinoic acid induced 14 [Source:ZFIN;Acc:ZDB-GENE-040718-235]
comp35621_c0_seq2	1.6791	ENSDARG00000039974	3.03579	1.60207	4.99684	178.439	1.0621e-40	6.0616e-39	21	18375725	18436384	rai14	retinoic acid induced 14 [Source:ZFIN;Acc:ZDB-GENE-040718-235]
comp48477_c0_seq1	4.48927	ENSDARG00000039987	1.29776	0.376019	6.12086	6.9362	0.00844683	0.0150941	20	37536063	37653692	hivep2a	human immunodeficiency virus type I enhancer binding protein 2a [Source:ZFIN;Acc:ZDB-GENE-041014-354]
comp5681_c0_seq1	1.85299	ENSDARG00000039987	1.29776	0.376019	6.12086	6.9362	0.00844683	0.0150941	20	37536063	37653692	hivep2a	human immunodeficiency virus type I enhancer binding protein 2a [Source:ZFIN;Acc:ZDB-GENE-041014-354]
comp15276_c0_seq1	5.48831	ENSDARG00000040005	1.78826	0.838553	2.64043	26.207	3.06709e-07	1.14491e-06	20	22786153	23008792	scfd2	sec1 family domain containing 2 [Source:ZFIN;Acc:ZDB-GENE-050320-143]
comp32917_c0_seq2	2.82129	ENSDARG00000040009	12.0438	3.59022	6.95068	386.191	5.5871e-86	1.7869e-83	20	23485786	23636541	palld	palladin, cytoskeletal associated protein [Source:ZFIN;Acc:ZDB-GENE-041014-252]
comp41588_c0_seq1	1.92225	ENSDARG00000040009	12.0438	3.59022	6.95068	386.191	5.5871e-86	1.7869e-83	20	23485786	23636541	palld	palladin, cytoskeletal associated protein [Source:ZFIN;Acc:ZDB-GENE-041014-252]
comp41588_c0_seq1	1.92225	ENSDARG00000040009	12.0438	3.59022	6.95068	386.191	5.5871e-86	1.7869e-83	20	23485786	23636541	palld	palladin, cytoskeletal associated protein [Source:ZFIN;Acc:ZDB-GENE-041014-252]
comp10954_c0_seq1	1.55306	ENSDARG00000040046	2.25932	1.17589	6.15558	82.5362	1.0376e-19	1.4314e-18	24	36882658	36888674	snai2	snail homolog 2 (Drosophila) [Source:ZFIN;Acc:ZDB-GENE-030326-6]
comp30568_c0_seq1	0.0990301	ENSDARG00000040046	2.25932	1.17589	6.15558	82.5362	1.0376e-19	1.4314e-18	24	36882658	36888674	snai2	snail homolog 2 (Drosophila) [Source:ZFIN;Acc:ZDB-GENE-030326-6]
comp35016_c0_seq2	0.556463	ENSDARG00000040064	1.53021	0.613734	4.99416	14.6198	0.00013153	0.00032653	9	31512076	31523722	acp6	acid phosphatase 6, lysophosphatidic [Source:ZFIN;Acc:ZDB-GENE-050208-290]
comp37016_c0_seq1	0.0495971	ENSDARG00000040111	1.8511	0.888386	5.02589	50.3905	1.26e-12	8.8737e-12	16	40824926	40864928	pi4kb	phosphatidylinositol 4-kinase, catalytic, beta [Source:ZFIN;Acc:ZDB-GENE-061013-96]
comp37016_c0_seq4	0.217374	ENSDARG00000040111	1.8511	0.888386	5.02589	50.3905	1.26e-12	8.8737e-12	16	40824926	40864928	pi4kb	phosphatidylinositol 4-kinase, catalytic, beta [Source:ZFIN;Acc:ZDB-GENE-061013-96]
comp37016_c0_seq5	0.640632	ENSDARG00000040111	1.8511	0.888386	5.02589	50.3905	1.26e-12	8.8737e-12	16	40824926	40864928	pi4kb	phosphatidylinositol 4-kinase, catalytic, beta [Source:ZFIN;Acc:ZDB-GENE-061013-96]
comp6108_c0_seq2	5.48831	ENSDARG00000040113	1.53669	0.619827	2.69506	14.7967	0.00011974	0.00029911	11	725065	737017	tamm41	TAM41, mitochondrial translocator assembly and maintenance protein, homolog (S. cerevisiae) [Source:ZFIN;Acc:ZDB-GENE-051030-99]
comp34937_c0_seq1	0.273592	ENSDARG00000040148	2.04943	1.03523	3.17364	37.2358	1.04672e-09	5.3734e-09	10	6269583	6271082	fam136a	family with sequence similarity 136, member A [Source:ZFIN;Acc:ZDB-GENE-040426-2729]
comp34937_c0_seq1	0.273592	ENSDARG00000040148	2.04943	1.03523	3.17364	37.2358	1.04672e-09	5.3734e-09	10	6269583	6271082	fam136a	family with sequence similarity 136, member A [Source:ZFIN;Acc:ZDB-GENE-040426-2729]
comp39829_c0_seq13	1.30471	ENSDARG00000040178	2.60026	1.37866	3.36606	37.6324	8.5415e-10	4.4264e-09	21	28496783	28504565	havcr1	hepatitis A virus cellular receptor 1 [Source:ZFIN;Acc:ZDB-GENE-040718-131]
comp39829_c0_seq20	1.91507	ENSDARG00000040178	2.60026	1.37866	3.36606	37.6324	8.5415e-10	4.4264e-09	21	28496783	28504565	havcr1	hepatitis A virus cellular receptor 1 [Source:ZFIN;Acc:ZDB-GENE-040718-131]
comp39856_c0_seq1	1.56383	ENSDARG00000040178	2.60026	1.37866	3.36606	37.6324	8.5415e-10	4.4264e-09	21	28496783	28504565	havcr1	hepatitis A virus cellular receptor 1 [Source:ZFIN;Acc:ZDB-GENE-040718-131]
comp16808_c0_seq1	0.802543	ENSDARG00000040184	1.87808	0.90926	7.9504	49.1286	2.3972e-12	1.6372e-11	20	2760603	2774552	syncrip	synaptotagmin binding, cytoplasmic RNA interacting protein [Source:ZFIN;Acc:ZDB-GENE-030131-4862]
comp16808_c0_seq2	0.0989442	ENSDARG00000040184	1.87808	0.90926	7.9504	49.1286	2.3972e-12	1.6372e-11	20	2760603	2774552	syncrip	synaptotagmin binding, cytoplasmic RNA interacting protein [Source:ZFIN;Acc:ZDB-GENE-030131-4862]
comp37749_c0_seq1	1.38383	ENSDARG00000040184	1.87808	0.90926	7.9504	49.1286	2.3972e-12	1.6372e-11	20	2760603	2774552	syncrip	synaptotagmin binding, cytoplasmic RNA interacting protein [Source:ZFIN;Acc:ZDB-GENE-030131-4862]
comp35686_c0_seq1	0.70671	ENSDARG00000040216	2.71294	1.43985	1.17875	23.3681	1.33781e-06	4.5509e-06	19	30510528	30513166	tpbga	trophoblast glycoprotein a [Source:ZFIN;Acc:ZDB-GENE-030827-4]
comp38801_c0_seq2	9.91673	ENSDARG00000040216	2.71294	1.43985	1.17875	23.3681	1.33781e-06	4.5509e-06	19	30510528	30513166	tpbga	trophoblast glycoprotein a [Source:ZFIN;Acc:ZDB-GENE-030827-4]
comp5074_c0_seq1	1.25132	ENSDARG00000040216	2.71294	1.43985	1.17875	23.3681	1.33781e-06	4.5509e-06	19	30510528	30513166	tpbga	trophoblast glycoprotein a [Source:ZFIN;Acc:ZDB-GENE-030827-4]
comp62961_c0_seq1	5.01568	ENSDARG00000040216	2.71294	1.43985	1.17875	23.3681	1.33781e-06	4.5509e-06	19	30510528	30513166	tpbga	trophoblast glycoprotein a [Source:ZFIN;Acc:ZDB-GENE-030827-4]
comp40576_c0_seq2	1.97107	ENSDARG00000040249	4.29285	2.10194	1.45765	44.0555	3.192e-11	1.9442e-10	16	31652175	31665300	tlr18	toll-like receptor 18 [Source:ZFIN;Acc:ZDB-GENE-040220-2]
comp10695_c0_seq1	5.66176	ENSDARG00000040251	2.7515	1.46022	9.48415	93.3739	4.3293e-22	7.3239e-21	16	31753228	31762840	ctsk	cathepsin K [Source:ZFIN;Acc:ZDB-GENE-001205-4]
comp39551_c0_seq1	3.96797	ENSDARG00000040251	2.7515	1.46022	9.48415	93.3739	4.3293e-22	7.3239e-21	16	31753228	31762840	ctsk	cathepsin K [Source:ZFIN;Acc:ZDB-GENE-001205-4]
comp39551_c0_seq2	1.44902	ENSDARG00000040251	2.7515	1.46022	9.48415	93.3739	4.3293e-22	7.3239e-21	16	31753228	31762840	ctsk	cathepsin K [Source:ZFIN;Acc:ZDB-GENE-001205-4]
comp40773_c0_seq1	1.71133	ENSDARG00000040265	1.6487	0.721327	5.56346	26.0515	3.32438e-07	1.23334e-06	7	27592694	27599351	mpdu1b	mannose-P-dolichol utilization defect 1b [Source:ZFIN;Acc:ZDB-GENE-040625-135]
comp40773_c0_seq2	1.16639	ENSDARG00000040265	1.6487	0.721327	5.56346	26.0515	3.32438e-07	1.23334e-06	7	27592694	27599351	mpdu1b	mannose-P-dolichol utilization defect 1b [Source:ZFIN;Acc:ZDB-GENE-040625-135]
comp40773_c0_seq6	7.97612	ENSDARG00000040265	1.6487	0.721327	5.56346	26.0515	3.32438e-07	1.23334e-06	7	27592694	27599351	mpdu1b	mannose-P-dolichol utilization defect 1b [Source:ZFIN;Acc:ZDB-GENE-040625-135]
comp23843_c0_seq1	0.953603	ENSDARG00000040296	1.77816	0.830384	3.90169	34.7522	3.74456e-09	1.79255e-08	18	49642250	49642814	rap2b	RAP2B, member of RAS oncogene family [Source:ZFIN;Acc:ZDB-GENE-040426-2818]
comp31475_c0_seq1	0.584451	ENSDARG00000040326	1.48248	0.568009	4.06227	15.9539	6.49022e-05	0.00016933	10	7177934	7220218	DHX29	DEAH (Asp-Glu-Ala-His) box polypeptide 29 [Source:HGNC Symbol;Acc:HGNC:15815]
comp40502_c0_seq2	10.8538	ENSDARG00000040346	1.79919	0.847347	3.92728	20.9576	4.69557e-06	1.47288e-05	5	70801143	70855694	ephb4a	eph receptor B4a [Source:ZFIN;Acc:ZDB-GENE-990415-62]
comp40502_c0_seq2	10.8538	ENSDARG00000040346	1.79919	0.847347	3.92728	20.9576	4.69557e-06	1.47288e-05	5	70801143	70855694	ephb4a	eph receptor B4a [Source:ZFIN;Acc:ZDB-GENE-990415-62]
comp40502_c0_seq3	10.0927	ENSDARG00000040346	1.79919	0.847347	3.92728	20.9576	4.69557e-06	1.47288e-05	5	70801143	70855694	ephb4a	eph receptor B4a [Source:ZFIN;Acc:ZDB-GENE-990415-62]
comp40502_c0_seq3	10.0927	ENSDARG00000040346	1.79919	0.847347	3.92728	20.9576	4.69557e-06	1.47288e-05	5	70801143	70855694	ephb4a	eph receptor B4a [Source:ZFIN;Acc:ZDB-GENE-990415-62]
comp40502_c0_seq3	10.0927	ENSDARG00000040346	1.79919	0.847347	3.92728	20.9576	4.69557e-06	1.47288e-05	5	70801143	70855694	ephb4a	eph receptor B4a [Source:ZFIN;Acc:ZDB-GENE-990415-62]
comp37614_c0_seq2	0.569686	ENSDARG00000040380	3.44122	1.78292	4.44852	152.045	6.1938e-35	2.5545e-33	19	11529767	11630602	arhgef1a	Rho guanine nucleotide exchange factor (GEF) 1a [Source:ZFIN;Acc:ZDB-GENE-030722-5]
comp15512_c0_seq1	0.551564	ENSDARG00000040440	1.63592	0.710103	6.20302	24.1007	9.14288e-07	3.1809e-06	18	39172964	39181178	snrpd2	small nuclear ribonucleoprotein D2 polypeptide [Source:ZFIN;Acc:ZDB-GENE-040914-10]
comp34105_c0_seq1	1.11277	ENSDARG00000040556	1.78986	0.839846	4.10534	40.3896	2.0805e-10	1.15248e-09	15	23138390	23143720	ift20	intraflagellar transport protein 20 [Source:ZFIN;Acc:ZDB-GENE-040614-2]
comp25873_c0_seq1	3.68738	ENSDARG00000040623	2.57007	1.36181	7.52134	56.8703	4.6553e-14	3.803e-13	17	41427846	41443739	fosl2	fos-like antigen 2 [Source:ZFIN;Acc:ZDB-GENE-070209-164]
comp38574_c0_seq1	3.18012	ENSDARG00000040623	2.57007	1.36181	7.52134	56.8703	4.6553e-14	3.803e-13	17	41427846	41443739	fosl2	fos-like antigen 2 [Source:ZFIN;Acc:ZDB-GENE-070209-164]
comp37741_c0_seq1	0.0561973	ENSDARG00000040649	3.89655	1.9622	5.36969	69.0062	9.8152e-17	1.0224e-15	25	383063	417239	prickle1a	prickle-like 1 (Drosophila) a [Source:ZFIN;Acc:ZDB-GENE-030724-5]
comp17940_c0_seq1	0.207573	ENSDARG00000040657	3.18423	1.67094	4.52197	139.57	3.3047e-32	1.1622e-30	3	36284104	36305521	wipi1	WD repeat domain, phosphoinositide interacting 1 [Source:ZFIN;Acc:ZDB-GENE-040426-1404]
comp15355_c0_seq1	0.191474	ENSDARG00000040678	1.18788	0.248389	5.13026	5.31983	0.0210841	0.0347678	9	39405761	39420447	ccdc93	coiled-coil domain containing 93 [Source:ZFIN;Acc:ZDB-GENE-060421-8315]
comp33569_c0_seq1	0.482785	ENSDARG00000040695	7.67835	2.9408	5.60966	382.071	4.4063e-85	1.358e-82	16	22382714	22392842	fkbp14	FK506 binding protein 14 [Source:ZFIN;Acc:ZDB-GENE-040801-210]
comp39185_c0_seq1	6.12865	ENSDARG00000040712	1.95366	0.966181	2.94865	29.4696	5.68008e-08	2.3347e-07	12	16028129	16075734	adprh	ADP-ribosylarginine hydrolase [Source:ZFIN;Acc:ZDB-GENE-040801-190]
comp39185_c0_seq2	0.33136	ENSDARG00000040712	1.95366	0.966181	2.94865	29.4696	5.68008e-08	2.3347e-07	12	16028129	16075734	adprh	ADP-ribosylarginine hydrolase [Source:ZFIN;Acc:ZDB-GENE-040801-190]
comp33081_c0_seq1	0.85278	ENSDARG00000040730	1.47967	0.565279	4.64717	11.6905	0.00062821	0.00138116	9	42193201	42230015	wdr75	WD repeat domain 75 [Source:ZFIN;Acc:ZDB-GENE-030616-5]
comp39907_c0_seq1	0.334648	ENSDARG00000040778	1.33156	0.413113	3.54549	6.49251	0.010833	0.0189642	9	37948566	37976697	ralba	v-ral simian leukemia viral oncogene homolog Ba (ras related) [Source:ZFIN;Acc:ZDB-GENE-040801-267]
comp40604_c0_seq1	1.22722	ENSDARG00000040815	1.42625	0.512227	5.49164	15.1029	0.00010181	0.00025761	15	28692374	28703114	tsku	tsukushi small leucine rich proteoglycan homolog (Xenopus laevis) [Source:ZFIN;Acc:ZDB-GENE-030131-4683]
comp45816_c0_seq1	1.02624	ENSDARG00000040853	1.1877	0.248174	4.92288	5.12419	0.0235946	0.0384606	22	32281672	32329856	shoc2	soc-2 suppressor of clear homolog (C. elegans) [Source:ZFIN;Acc:ZDB-GENE-050208-523]
comp45946_c0_seq1	1.02404	ENSDARG00000040853	1.1877	0.248174	4.92288	5.12419	0.0235946	0.0384606	22	32281672	32329856	shoc2	soc-2 suppressor of clear homolog (C. elegans) [Source:ZFIN;Acc:ZDB-GENE-050208-523]
comp7432_c0_seq1	1.54476	ENSDARG00000040853	1.1877	0.248174	4.92288	5.12419	0.0235946	0.0384606	22	32281672	32329856	shoc2	soc-2 suppressor of clear homolog (C. elegans) [Source:ZFIN;Acc:ZDB-GENE-050208-523]
comp33472_c0_seq5	0.402395	ENSDARG00000040874	1.3867	0.471657	5.05319	11.0789	0.00087315	0.00186948	22	32736920	32960144	add3a	adducin 3 (gamma) a [Source:ZFIN;Acc:ZDB-GENE-030131-2721]
comp33472_c0_seq6	1.19455	ENSDARG00000040874	1.3867	0.471657	5.05319	11.0789	0.00087315	0.00186948	22	32736920	32960144	add3a	adducin 3 (gamma) a [Source:ZFIN;Acc:ZDB-GENE-030131-2721]
comp25476_c0_seq1	0.989298	ENSDARG00000040884	1.29501	0.372963	7.08006	7.97076	0.0047539	0.00890817	22	33020249	33050753	mxi1	max interacting protein [Source:ZFIN;Acc:ZDB-GENE-990415-151]
comp25476_c0_seq2	0.53305	ENSDARG00000040884	1.29501	0.372963	7.08006	7.97076	0.0047539	0.00890817	22	33020249	33050753	mxi1	max interacting protein [Source:ZFIN;Acc:ZDB-GENE-990415-151]
comp33094_c0_seq1	9.82995	ENSDARG00000040917	2.24246	1.16508	5.57462	129.697	4.7737e-30	1.4739e-28	18	22774824	22852023	cbfb	core-binding factor, beta subunit [Source:ZFIN;Acc:ZDB-GENE-980526-440]
comp33094_c0_seq1	9.82995	ENSDARG00000040917	2.24246	1.16508	5.57462	129.697	4.7737e-30	1.4739e-28	18	22774824	22852023	cbfb	core-binding factor, beta subunit [Source:ZFIN;Acc:ZDB-GENE-980526-440]
comp33094_c0_seq2	11.3214	ENSDARG00000040917	2.24246	1.16508	5.57462	129.697	4.7737e-30	1.4739e-28	18	22774824	22852023	cbfb	core-binding factor, beta subunit [Source:ZFIN;Acc:ZDB-GENE-980526-440]
comp33094_c0_seq2	11.3214	ENSDARG00000040917	2.24246	1.16508	5.57462	129.697	4.7737e-30	1.4739e-28	18	22774824	22852023	cbfb	core-binding factor, beta subunit [Source:ZFIN;Acc:ZDB-GENE-980526-440]
comp33094_c0_seq3	1.06797	ENSDARG00000040917	2.24246	1.16508	5.57462	129.697	4.7737e-30	1.4739e-28	18	22774824	22852023	cbfb	core-binding factor, beta subunit [Source:ZFIN;Acc:ZDB-GENE-980526-440]
comp33094_c0_seq3	1.06797	ENSDARG00000040917	2.24246	1.16508	5.57462	129.697	4.7737e-30	1.4739e-28	18	22774824	22852023	cbfb	core-binding factor, beta subunit [Source:ZFIN;Acc:ZDB-GENE-980526-440]
comp33094_c0_seq4	1.79032	ENSDARG00000040917	2.24246	1.16508	5.57462	129.697	4.7737e-30	1.4739e-28	18	22774824	22852023	cbfb	core-binding factor, beta subunit [Source:ZFIN;Acc:ZDB-GENE-980526-440]
comp33094_c0_seq4	1.79032	ENSDARG00000040917	2.24246	1.16508	5.57462	129.697	4.7737e-30	1.4739e-28	18	22774824	22852023	cbfb	core-binding factor, beta subunit [Source:ZFIN;Acc:ZDB-GENE-980526-440]
comp33094_c0_seq4	1.79032	ENSDARG00000040917	2.24246	1.16508	5.57462	129.697	4.7737e-30	1.4739e-28	18	22774824	22852023	cbfb	core-binding factor, beta subunit [Source:ZFIN;Acc:ZDB-GENE-980526-440]
comp38199_c0_seq1	1.74929	ENSDARG00000041060	1.95437	0.966703	4.83843	35.444	2.62486e-09	1.28336e-08	15	30351752	30365141	zgc:92326	zgc:92326 [Source:ZFIN;Acc:ZDB-GENE-040718-159]
comp38199_c0_seq1	1.74929	ENSDARG00000041060	1.95437	0.966703	4.83843	35.444	2.62486e-09	1.28336e-08	15	30351752	30365141	zgc:92326	zgc:92326 [Source:ZFIN;Acc:ZDB-GENE-040718-159]
comp38199_c0_seq2	2.47056	ENSDARG00000041060	1.95437	0.966703	4.83843	35.444	2.62486e-09	1.28336e-08	15	30351752	30365141	zgc:92326	zgc:92326 [Source:ZFIN;Acc:ZDB-GENE-040718-159]
comp38199_c0_seq2	2.47056	ENSDARG00000041060	1.95437	0.966703	4.83843	35.444	2.62486e-09	1.28336e-08	15	30351752	30365141	zgc:92326	zgc:92326 [Source:ZFIN;Acc:ZDB-GENE-040718-159]
comp29396_c0_seq2	0.172398	ENSDARG00000041217	1.24726	0.318767	4.93393	4.66152	0.0308459	0.048967	3	14689988	14736032	xpo6	exportin 6 [Source:ZFIN;Acc:ZDB-GENE-030131-5912]
comp29396_c0_seq3	7.464	ENSDARG00000041217	1.24726	0.318767	4.93393	4.66152	0.0308459	0.048967	3	14689988	14736032	xpo6	exportin 6 [Source:ZFIN;Acc:ZDB-GENE-030131-5912]
comp12783_c0_seq1	0.908372	ENSDARG00000041260	3.50982	1.8114	2.244	36.7447	1.34655e-09	6.82373e-09	18	18271484	18415312	st3gal2	ST3 beta-galactoside alpha-2,3-sialyltransferase 2 [Source:ZFIN;Acc:ZDB-GENE-050419-181]
comp12783_c0_seq1	0.908372	ENSDARG00000041260	3.50982	1.8114	2.244	36.7447	1.34655e-09	6.82373e-09	18	18271484	18415312	st3gal2	ST3 beta-galactoside alpha-2,3-sialyltransferase 2 [Source:ZFIN;Acc:ZDB-GENE-050419-181]
comp34302_c0_seq1	0.03769	ENSDARG00000041260	3.50982	1.8114	2.244	36.7447	1.34655e-09	6.82373e-09	18	18271484	18415312	st3gal2	ST3 beta-galactoside alpha-2,3-sialyltransferase 2 [Source:ZFIN;Acc:ZDB-GENE-050419-181]
comp39611_c0_seq1	0.525984	ENSDARG00000041260	3.50982	1.8114	2.244	36.7447	1.34655e-09	6.82373e-09	18	18271484	18415312	st3gal2	ST3 beta-galactoside alpha-2,3-sialyltransferase 2 [Source:ZFIN;Acc:ZDB-GENE-050419-181]
comp39611_c0_seq2	0.761686	ENSDARG00000041260	3.50982	1.8114	2.244	36.7447	1.34655e-09	6.82373e-09	18	18271484	18415312	st3gal2	ST3 beta-galactoside alpha-2,3-sialyltransferase 2 [Source:ZFIN;Acc:ZDB-GENE-050419-181]
comp41806_c0_seq1	0.779462	ENSDARG00000041332	1.33919	0.421363	4.90876	10.1464	0.0014458	0.00298184	14	49291490	49301298	tmem33	transmembrane protein 33 [Source:ZFIN;Acc:ZDB-GENE-030131-5425]
comp28583_c0_seq1	0.581306	ENSDARG00000041337	1.43528	0.521329	1.8147	5.21042	0.0224519	0.0367784	7	65359530	65367616	lypla1	lysophospholipase I [Source:ZFIN;Acc:ZDB-GENE-050417-87]
comp37270_c0_seq1	0.883719	ENSDARG00000041361	3.76065	1.91098	3.79596	77.3399	1.4393e-18	1.7873e-17	16	6344535	6377256	ttk	ttk protein kinase [Source:ZFIN;Acc:ZDB-GENE-030123-1]
comp33781_c0_seq1	9.48336	ENSDARG00000041373	1.52564	0.60941	4.33432	20.9728	4.65849e-06	1.46288e-05	17	49995369	50007463	FCF1	FCF1 rRNA-processing protein [Source:HGNC Symbol;Acc:HGNC:20220]
comp27657_c0_seq1	0.224115	ENSDARG00000041376	1.3804	0.465085	2.4433	5.65626	0.0173932	0.0291336	8	52027182	52030831	rmi1	RMI1, RecQ mediated genome instability 1, homolog (S. cerevisiae) [Source:ZFIN;Acc:ZDB-GENE-040426-829]
comp30615_c0_seq1	0.538536	ENSDARG00000041411	1.54348	0.62619	4.30083	15.2315	9.51034e-05	0.00024173	20	46678960	46693134	rad51	RAD51 homolog (RecA homolog, E. coli) (S. cerevisiae) [Source:ZFIN;Acc:ZDB-GENE-040426-2286]
comp40719_c0_seq10	1.1116	ENSDARG00000041449	1.28523	0.362027	4.689	8.97594	0.00273557	0.00535503	17	53167625	53187252	spred1	sprouty-related, EVH1 domain containing 1 [Source:ZFIN;Acc:ZDB-GENE-040426-2338]
comp39589_c0_seq1	0.202781	ENSDARG00000041450	1.19772	0.260293	7.64799	5.44212	0.0196568	0.0325839	18	18912484	18919863	rab11a	RAB11a, member RAS oncogene family [Source:ZFIN;Acc:ZDB-GENE-041114-53]
comp30007_c0_seq1	0.105277	ENSDARG00000041560	1.49166	0.576919	1.3751	5.08292	0.0241627	0.0392696	18	17153027	17166178	C18H16orf70	chromosome 16 open reading frame 70 [Source:HGNC Symbol;Acc:HGNC:29564]
comp30007_c0_seq1	0.105277	ENSDARG00000041560	1.49166	0.576919	1.3751	5.08292	0.0241627	0.0392696	18	17153027	17166178	C18H16orf70	chromosome 16 open reading frame 70 [Source:HGNC Symbol;Acc:HGNC:29564]
comp30007_c0_seq2	8.58296	ENSDARG00000041560	1.49166	0.576919	1.3751	5.08292	0.0241627	0.0392696	18	17153027	17166178	C18H16orf70	chromosome 16 open reading frame 70 [Source:HGNC Symbol;Acc:HGNC:29564]
comp30007_c0_seq2	8.58296	ENSDARG00000041560	1.49166	0.576919	1.3751	5.08292	0.0241627	0.0392696	18	17153027	17166178	C18H16orf70	chromosome 16 open reading frame 70 [Source:HGNC Symbol;Acc:HGNC:29564]
comp44452_c0_seq1	0.433814	ENSDARG00000041586	1.2303	0.299005	3.93281	4.73235	0.0296004	0.0472214	15	16277261	16304203	dhx40	DEAH (Asp-Glu-Ala-His) box polypeptide 40 [Source:ZFIN;Acc:ZDB-GENE-080507-1]
comp35138_c0_seq1	0.813538	ENSDARG00000041689	1.49283	0.578049	4.25348	19.076	1.25613e-05	3.69279e-05	15	20214200	20222834	usf1	upstream transcription factor 1 [Source:ZFIN;Acc:ZDB-GENE-040426-1072]
comp35138_c0_seq2	0.306491	ENSDARG00000041689	1.49283	0.578049	4.25348	19.076	1.25613e-05	3.69279e-05	15	20214200	20222834	usf1	upstream transcription factor 1 [Source:ZFIN;Acc:ZDB-GENE-040426-1072]
comp28273_c0_seq2	0.208339	ENSDARG00000041708	1.34795	0.43077	3.67455	9.70831	0.00183436	0.00370523	22	25538580	25551188	csrp2bp	cysteine and glycine-rich protein 2 binding protein [Source:ZFIN;Acc:ZDB-GENE-040718-452]
comp28273_c0_seq3	1.39797	ENSDARG00000041708	1.34795	0.43077	3.67455	9.70831	0.00183436	0.00370523	22	25538580	25551188	csrp2bp	cysteine and glycine-rich protein 2 binding protein [Source:ZFIN;Acc:ZDB-GENE-040718-452]
comp38216_c0_seq1	8.17701	ENSDARG00000041728	1.9324	0.950394	4.77553	44.8905	2.0837e-11	1.2962e-10	9	21587525	21798675	MAN1A2	mannosidase, alpha, class 1A, member 2 [Source:HGNC Symbol;Acc:HGNC:6822]
comp38216_c0_seq1	8.17701	ENSDARG00000041728	1.9324	0.950394	4.77553	44.8905	2.0837e-11	1.2962e-10	9	21587525	21798675	MAN1A2	mannosidase, alpha, class 1A, member 2 [Source:HGNC Symbol;Acc:HGNC:6822]
comp38216_c0_seq2	0.575715	ENSDARG00000041728	1.9324	0.950394	4.77553	44.8905	2.0837e-11	1.2962e-10	9	21587525	21798675	MAN1A2	mannosidase, alpha, class 1A, member 2 [Source:HGNC Symbol;Acc:HGNC:6822]
comp22228_c0_seq1	0.214266	ENSDARG00000041734	2.07202	1.05104	-0.0032161	9.13652	0.00250557	0.0049432	20	40798376	40872724	tbc1d32	TBC1 domain family, member 32 [Source:ZFIN;Acc:ZDB-GENE-061106-5]
comp61821_c0_seq1	0.34565	ENSDARG00000041734	2.07202	1.05104	-0.0032161	9.13652	0.00250557	0.0049432	20	40798376	40872724	tbc1d32	TBC1 domain family, member 32 [Source:ZFIN;Acc:ZDB-GENE-061106-5]
comp70752_c0_seq1	1.68047	ENSDARG00000041734	2.07202	1.05104	-0.0032161	9.13652	0.00250557	0.0049432	20	40798376	40872724	tbc1d32	TBC1 domain family, member 32 [Source:ZFIN;Acc:ZDB-GENE-061106-5]
comp71004_c0_seq1	1.72282	ENSDARG00000041734	2.07202	1.05104	-0.0032161	9.13652	0.00250557	0.0049432	20	40798376	40872724	tbc1d32	TBC1 domain family, member 32 [Source:ZFIN;Acc:ZDB-GENE-061106-5]
comp77033_c0_seq1	1.31408	ENSDARG00000041734	2.07202	1.05104	-0.0032161	9.13652	0.00250557	0.0049432	20	40798376	40872724	tbc1d32	TBC1 domain family, member 32 [Source:ZFIN;Acc:ZDB-GENE-061106-5]
comp41772_c0_seq1	1.015	ENSDARG00000041830	1.35871	0.442237	4.80314	13.3183	0.00026283	0.00062016	9	23963020	23972855	tsn	translin [Source:ZFIN;Acc:ZDB-GENE-030131-6039]
comp17706_c0_seq1	0.765069	ENSDARG00000041870	1.36564	0.449574	4.04739	13.7613	0.00020757	0.00049873	20	38861947	38925129	ift172	intraflagellar transport 172 [Source:ZFIN;Acc:ZDB-GENE-040827-1]
comp26598_c0_seq1	0.655271	ENSDARG00000041870	1.36564	0.449574	4.04739	13.7613	0.00020757	0.00049873	20	38861947	38925129	ift172	intraflagellar transport 172 [Source:ZFIN;Acc:ZDB-GENE-040827-1]
comp31209_c0_seq2	0.119173	ENSDARG00000041870	1.36564	0.449574	4.04739	13.7613	0.00020757	0.00049873	20	38861947	38925129	ift172	intraflagellar transport 172 [Source:ZFIN;Acc:ZDB-GENE-040827-1]
comp45326_c0_seq1	0.700364	ENSDARG00000041870	1.36564	0.449574	4.04739	13.7613	0.00020757	0.00049873	20	38861947	38925129	ift172	intraflagellar transport 172 [Source:ZFIN;Acc:ZDB-GENE-040827-1]
comp53798_c0_seq1	0.495139	ENSDARG00000041870	1.36564	0.449574	4.04739	13.7613	0.00020757	0.00049873	20	38861947	38925129	ift172	intraflagellar transport 172 [Source:ZFIN;Acc:ZDB-GENE-040827-1]
comp41425_c0_seq1	0.128148	ENSDARG00000041921	1.52375	0.607627	6.32811	24.262	8.40797e-07	2.93929e-06	18	13920193	13923528	hsbp1b	heat shock factor binding protein 1b [Source:ZFIN;Acc:ZDB-GENE-040426-1721]
comp35670_c0_seq1	0.0339301	ENSDARG00000041997	1.37383	0.458204	4.86734	14.4126	0.00014682	0.00036147	24	11853461	11972939	lztfl1	leucine zipper transcription factor-like 1 [Source:ZFIN;Acc:ZDB-GENE-030131-945]
comp41133_c0_seq11	2.11011	ENSDARG00000042027	6.01611	2.58883	5.28907	206.441	8.2106e-47	6.3551e-45	20	34536286	34545649	prrx1b	paired related homeobox 1b [Source:ZFIN;Acc:ZDB-GENE-030131-9033]
comp41133_c0_seq11	2.11011	ENSDARG00000042027	6.01611	2.58883	5.28907	206.441	8.2106e-47	6.3551e-45	20	34536286	34545649	prrx1b	paired related homeobox 1b [Source:ZFIN;Acc:ZDB-GENE-030131-9033]
comp41133_c0_seq11	2.11011	ENSDARG00000042027	6.01611	2.58883	5.28907	206.441	8.2106e-47	6.3551e-45	20	34536286	34545649	prrx1b	paired related homeobox 1b [Source:ZFIN;Acc:ZDB-GENE-030131-9033]
comp41133_c0_seq12	1.28047	ENSDARG00000042027	6.01611	2.58883	5.28907	206.441	8.2106e-47	6.3551e-45	20	34536286	34545649	prrx1b	paired related homeobox 1b [Source:ZFIN;Acc:ZDB-GENE-030131-9033]
comp41133_c0_seq12	1.28047	ENSDARG00000042027	6.01611	2.58883	5.28907	206.441	8.2106e-47	6.3551e-45	20	34536286	34545649	prrx1b	paired related homeobox 1b [Source:ZFIN;Acc:ZDB-GENE-030131-9033]
comp41133_c0_seq12	1.28047	ENSDARG00000042027	6.01611	2.58883	5.28907	206.441	8.2106e-47	6.3551e-45	20	34536286	34545649	prrx1b	paired related homeobox 1b [Source:ZFIN;Acc:ZDB-GENE-030131-9033]
comp41133_c0_seq14	0.476451	ENSDARG00000042027	6.01611	2.58883	5.28907	206.441	8.2106e-47	6.3551e-45	20	34536286	34545649	prrx1b	paired related homeobox 1b [Source:ZFIN;Acc:ZDB-GENE-030131-9033]
comp41133_c0_seq14	0.476451	ENSDARG00000042027	6.01611	2.58883	5.28907	206.441	8.2106e-47	6.3551e-45	20	34536286	34545649	prrx1b	paired related homeobox 1b [Source:ZFIN;Acc:ZDB-GENE-030131-9033]
comp41133_c0_seq14	0.476451	ENSDARG00000042027	6.01611	2.58883	5.28907	206.441	8.2106e-47	6.3551e-45	20	34536286	34545649	prrx1b	paired related homeobox 1b [Source:ZFIN;Acc:ZDB-GENE-030131-9033]
comp41133_c0_seq5	1.74785	ENSDARG00000042027	6.01611	2.58883	5.28907	206.441	8.2106e-47	6.3551e-45	20	34536286	34545649	prrx1b	paired related homeobox 1b [Source:ZFIN;Acc:ZDB-GENE-030131-9033]
comp41133_c0_seq5	1.74785	ENSDARG00000042027	6.01611	2.58883	5.28907	206.441	8.2106e-47	6.3551e-45	20	34536286	34545649	prrx1b	paired related homeobox 1b [Source:ZFIN;Acc:ZDB-GENE-030131-9033]
comp41133_c0_seq5	1.74785	ENSDARG00000042027	6.01611	2.58883	5.28907	206.441	8.2106e-47	6.3551e-45	20	34536286	34545649	prrx1b	paired related homeobox 1b [Source:ZFIN;Acc:ZDB-GENE-030131-9033]
comp41133_c0_seq8	1.70968	ENSDARG00000042027	6.01611	2.58883	5.28907	206.441	8.2106e-47	6.3551e-45	20	34536286	34545649	prrx1b	paired related homeobox 1b [Source:ZFIN;Acc:ZDB-GENE-030131-9033]
comp41133_c0_seq8	1.70968	ENSDARG00000042027	6.01611	2.58883	5.28907	206.441	8.2106e-47	6.3551e-45	20	34536286	34545649	prrx1b	paired related homeobox 1b [Source:ZFIN;Acc:ZDB-GENE-030131-9033]
comp41133_c0_seq8	1.70968	ENSDARG00000042027	6.01611	2.58883	5.28907	206.441	8.2106e-47	6.3551e-45	20	34536286	34545649	prrx1b	paired related homeobox 1b [Source:ZFIN;Acc:ZDB-GENE-030131-9033]
comp41133_c0_seq9	2.55835	ENSDARG00000042027	6.01611	2.58883	5.28907	206.441	8.2106e-47	6.3551e-45	20	34536286	34545649	prrx1b	paired related homeobox 1b [Source:ZFIN;Acc:ZDB-GENE-030131-9033]
comp41133_c0_seq9	2.55835	ENSDARG00000042027	6.01611	2.58883	5.28907	206.441	8.2106e-47	6.3551e-45	20	34536286	34545649	prrx1b	paired related homeobox 1b [Source:ZFIN;Acc:ZDB-GENE-030131-9033]
comp41133_c0_seq9	2.55835	ENSDARG00000042027	6.01611	2.58883	5.28907	206.441	8.2106e-47	6.3551e-45	20	34536286	34545649	prrx1b	paired related homeobox 1b [Source:ZFIN;Acc:ZDB-GENE-030131-9033]
comp32195_c0_seq1	1.49695	ENSDARG00000042029	2.70819	1.43733	4.14308	124.727	5.8408e-29	1.6752e-27	22	20610857	20627983	mbd3b	methyl-CpG binding domain protein 3b [Source:ZFIN;Acc:ZDB-GENE-030131-9792]
comp28065_c0_seq1	0.917072	ENSDARG00000042031	1.36654	0.450526	4.09477	10.1194	0.00146715	0.00302072	20	34525760	34532103	gorab	golgin, rab6-interacting [Source:ZFIN;Acc:ZDB-GENE-040426-1384]
comp39523_c0_seq2	1.42676	ENSDARG00000042141	1.63894	0.712763	1.05618	8.02044	0.00462523	0.0086882	17	36854612	37009499	myo6b	myosin VIb [Source:ZFIN;Acc:ZDB-GENE-030318-3]
comp35381_c0_seq1	11.0067	ENSDARG00000042147	1.22237	0.28968	4.72441	5.31619	0.0211281	0.034832	22	729125	743234	rbbp5	retinoblastoma binding protein 5 [Source:ZFIN;Acc:ZDB-GENE-040426-886]
comp28176_c0_seq1	0.0459122	ENSDARG00000042151	1.53009	0.613616	6.35548	17.9557	2.261e-05	6.38559e-05	8	17915329	18035848	skia	nuclear oncoprotein skia [Source:ZFIN;Acc:ZDB-GENE-990715-9]
comp39277_c0_seq1	0.276956	ENSDARG00000042221	1.78453	0.835544	5.90614	12.6165	0.00038235	0.00087714	20	26507804	26561774	mthfd1l	methylenetetrahydrofolate dehydrogenase (NADP+ dependent) 1-like [Source:ZFIN;Acc:ZDB-GENE-041001-133]
comp24422_c0_seq1	1.29438	ENSDARG00000042236	1.40713	0.49276	7.18806	18.6236	1.59236e-05	4.62035e-05	14	10855604	10934803	atrx	alpha thalassemia/mental retardation syndrome X-linked homolog (human) [Source:ZFIN;Acc:ZDB-GENE-030912-11]
comp28249_c0_seq1	1.02212	ENSDARG00000042236	1.40713	0.49276	7.18806	18.6236	1.59236e-05	4.62035e-05	14	10855604	10934803	atrx	alpha thalassemia/mental retardation syndrome X-linked homolog (human) [Source:ZFIN;Acc:ZDB-GENE-030912-11]
comp40801_c0_seq1	9.36489	ENSDARG00000042249	1.30417	0.383136	4.18795	6.71558	0.00955743	0.0169234	18	7959828	8119764	FRMD4A	FERM domain containing 4A [Source:HGNC Symbol;Acc:HGNC:25491]
comp40801_c0_seq11	9.75865	ENSDARG00000042249	1.30417	0.383136	4.18795	6.71558	0.00955743	0.0169234	18	7959828	8119764	FRMD4A	FERM domain containing 4A [Source:HGNC Symbol;Acc:HGNC:25491]
comp40801_c0_seq5	8.71797	ENSDARG00000042249	1.30417	0.383136	4.18795	6.71558	0.00955743	0.0169234	18	7959828	8119764	FRMD4A	FERM domain containing 4A [Source:HGNC Symbol;Acc:HGNC:25491]
comp40801_c0_seq7	9.53305	ENSDARG00000042249	1.30417	0.383136	4.18795	6.71558	0.00955743	0.0169234	18	7959828	8119764	FRMD4A	FERM domain containing 4A [Source:HGNC Symbol;Acc:HGNC:25491]
comp40801_c0_seq8	10.1496	ENSDARG00000042249	1.30417	0.383136	4.18795	6.71558	0.00955743	0.0169234	18	7959828	8119764	FRMD4A	FERM domain containing 4A [Source:HGNC Symbol;Acc:HGNC:25491]
comp40801_c0_seq9	0.289213	ENSDARG00000042249	1.30417	0.383136	4.18795	6.71558	0.00955743	0.0169234	18	7959828	8119764	FRMD4A	FERM domain containing 4A [Source:HGNC Symbol;Acc:HGNC:25491]
comp65827_c0_seq1	0.552885	ENSDARG00000042249	1.30417	0.383136	4.18795	6.71558	0.00955743	0.0169234	18	7959828	8119764	FRMD4A	FERM domain containing 4A [Source:HGNC Symbol;Acc:HGNC:25491]
comp30507_c0_seq1	0.977749	ENSDARG00000042252	1.5376	0.620684	6.4737	34.1281	5.16001e-09	2.41957e-08	15	4444066	4475728	eif4h	eukaryotic translation initiation factor 4h [Source:ZFIN;Acc:ZDB-GENE-010328-19]
comp79641_c0_seq1	6.5706	ENSDARG00000042252	1.5376	0.620684	6.4737	34.1281	5.16001e-09	2.41957e-08	15	4444066	4475728	eif4h	eukaryotic translation initiation factor 4h [Source:ZFIN;Acc:ZDB-GENE-010328-19]
comp34869_c0_seq1	0.47671	ENSDARG00000042261	1.81687	0.861453	2.10046	18.1811	2.00867e-05	5.72059e-05	17	38614991	38640988	cdan1	congenital dyserythropoietic anemia, type I [Source:ZFIN;Acc:ZDB-GENE-110411-280]
comp34869_c0_seq1	0.47671	ENSDARG00000042261	1.81687	0.861453	2.10046	18.1811	2.00867e-05	5.72059e-05	17	38614991	38640988	cdan1	congenital dyserythropoietic anemia, type I [Source:ZFIN;Acc:ZDB-GENE-110411-280]
comp4591_c0_seq1	0.0752738	ENSDARG00000042261	1.81687	0.861453	2.10046	18.1811	2.00867e-05	5.72059e-05	17	38614991	38640988	cdan1	congenital dyserythropoietic anemia, type I [Source:ZFIN;Acc:ZDB-GENE-110411-280]
comp30170_c0_seq1	1.50287	ENSDARG00000042296	4.24245	2.0849	5.8404	127.118	1.7508e-29	5.1885e-28	19	42442147	42444159	dlx5a	distal-less homeobox gene 5a [Source:ZFIN;Acc:ZDB-GENE-990415-49]
comp3190_c0_seq1	1.43023	ENSDARG00000042296	4.24245	2.0849	5.8404	127.118	1.7508e-29	5.1885e-28	19	42442147	42444159	dlx5a	distal-less homeobox gene 5a [Source:ZFIN;Acc:ZDB-GENE-990415-49]
comp36511_c0_seq1	0.706132	ENSDARG00000042382	1.21623	0.282415	5.98502	5.20761	0.0224882	0.0368272	18	7017446	7026435	ARF4 (1 of 3)	ADP-ribosylation factor 4 [Source:HGNC Symbol;Acc:HGNC:655]
comp16669_c0_seq1	0.537106	ENSDARG00000042401	1.58341	0.663035	5.20259	32.8146	1.01381e-08	4.58024e-08	5	60695377	60707338	derl2	Der1-like domain family, member 2 [Source:ZFIN;Acc:ZDB-GENE-050522-90]
comp23735_c0_seq1	0.447176	ENSDARG00000042458	1.38039	0.465074	3.66385	9.76432	0.00177932	0.00360176	11	46549102	46552409	rfc4	replication factor C (activator 1) 4 [Source:ZFIN;Acc:ZDB-GENE-040824-3]
comp23735_c0_seq2	7.18199	ENSDARG00000042458	1.38039	0.465074	3.66385	9.76432	0.00177932	0.00360176	11	46549102	46552409	rfc4	replication factor C (activator 1) 4 [Source:ZFIN;Acc:ZDB-GENE-040824-3]
comp43178_c0_seq1	0.551034	ENSDARG00000042510	1.71554	0.778664	1.57646	10.2731	0.00134984	0.00280096	20	28961321	28964638	si:dkey-11e23.4	si:dkey-11e23.4 [Source:ZFIN;Acc:ZDB-GENE-041001-182]
comp39982_c0_seq2	1.1643	ENSDARG00000042520	1.31492	0.394971	5.30527	10.0116	0.00155556	0.00318381	5	70470606	70495766	UTP14A	UTP14, U3 small nucleolar ribonucleoprotein, homolog A (yeast) [Source:HGNC Symbol;Acc:HGNC:10665]
comp36073_c0_seq1	0.0596545	ENSDARG00000042530	1.23811	0.308144	5.44631	5.49991	0.0190175	0.0316386	18	11684599	11719423	nup205	nucleoporin 205 [Source:ZFIN;Acc:ZDB-GENE-040715-8]
comp35821_c0_seq1	0.155647	ENSDARG00000042555	1.42204	0.507957	2.55077	5.72263	0.0167476	0.028144	21	3729172	3865025	dym	dymeclin [Source:ZFIN;Acc:ZDB-GENE-091204-348]
comp43043_c0_seq1	2.11099	ENSDARG00000042563	3.3727	1.7539	2.87607	84.8884	3.1569e-20	4.5465e-19	17	28670856	28682470	MIS18BP1	MIS18 binding protein 1 [Source:HGNC Symbol;Acc:HGNC:20190]
comp25047_c0_seq1	0.15611	ENSDARG00000042615	1.55782	0.639525	5.08897	34.4016	4.4836e-09	2.11881e-08	18	47247679	47260280	icln	swelling dependent chloride channel [Source:ZFIN;Acc:ZDB-GENE-990415-259]
comp16047_c0_seq1	0.621467	ENSDARG00000042623	1.53828	0.621315	5.88361	26.3654	2.82551e-07	1.06151e-06	20	30728439	30747770	acbd3	acyl-Coenzyme A binding domain containing 3 [Source:ZFIN;Acc:ZDB-GENE-040426-1930]
comp32389_c0_seq1	0.43024	ENSDARG00000042624	6.30034	2.65543	1.59333	87.3997	8.8666e-21	1.3468e-19	18	6588218	6625532	pak1	p21/Cdc42/Rac1-activated kinase 1 [Source:ZFIN;Acc:ZDB-GENE-030826-29]
comp38997_c0_seq1	0.522756	ENSDARG00000042624	6.30034	2.65543	1.59333	87.3997	8.8666e-21	1.3468e-19	18	6588218	6625532	pak1	p21/Cdc42/Rac1-activated kinase 1 [Source:ZFIN;Acc:ZDB-GENE-030826-29]
comp38997_c0_seq1	0.522756	ENSDARG00000042624	6.30034	2.65543	1.59333	87.3997	8.8666e-21	1.3468e-19	18	6588218	6625532	pak1	p21/Cdc42/Rac1-activated kinase 1 [Source:ZFIN;Acc:ZDB-GENE-030826-29]
comp15104_c0_seq1	0.510001	ENSDARG00000042635	1.97169	0.979434	5.17422	42.6854	6.4291e-11	3.7566e-10	22	23574564	23582944	uchl5	ubiquitin carboxyl-terminal hydrolase L5 [Source:ZFIN;Acc:ZDB-GENE-040426-2051]
comp16488_c0_seq1	0.270618	ENSDARG00000042670	3.06504	1.61591	2.36559	56.3082	6.1956e-14	4.9797e-13	22	16058419	16103201	eps15l1a	epidermal growth factor receptor pathway substrate 15-like 1a [Source:ZFIN;Acc:ZDB-GENE-060503-274]
comp16488_c0_seq1	0.270618	ENSDARG00000042670	3.06504	1.61591	2.36559	56.3082	6.1956e-14	4.9797e-13	22	16058419	16103201	eps15l1a	epidermal growth factor receptor pathway substrate 15-like 1a [Source:ZFIN;Acc:ZDB-GENE-060503-274]
comp16488_c0_seq1	0.270618	ENSDARG00000042670	3.06504	1.61591	2.36559	56.3082	6.1956e-14	4.9797e-13	22	16058419	16103201	eps15l1a	epidermal growth factor receptor pathway substrate 15-like 1a [Source:ZFIN;Acc:ZDB-GENE-060503-274]
comp16488_c0_seq2	0.454839	ENSDARG00000042670	3.06504	1.61591	2.36559	56.3082	6.1956e-14	4.9797e-13	22	16058419	16103201	eps15l1a	epidermal growth factor receptor pathway substrate 15-like 1a [Source:ZFIN;Acc:ZDB-GENE-060503-274]
comp16488_c0_seq2	0.454839	ENSDARG00000042670	3.06504	1.61591	2.36559	56.3082	6.1956e-14	4.9797e-13	22	16058419	16103201	eps15l1a	epidermal growth factor receptor pathway substrate 15-like 1a [Source:ZFIN;Acc:ZDB-GENE-060503-274]
comp19080_c0_seq1	3.42015	ENSDARG00000042688	5.14146	2.36218	1.34805	67.7059	1.8979e-16	1.9276e-15	1	29779637	29791053	bora	bora, aurora kinase A activator [Source:ZFIN;Acc:ZDB-GENE-041114-165]
comp30654_c0_seq1	1.61124	ENSDARG00000042722	2.54419	1.34721	2.57289	32.2958	1.32398e-08	5.89359e-08	13	51494234	51543077	blnk	B-cell linker [Source:ZFIN;Acc:ZDB-GENE-040702-4]
comp30654_c0_seq2	0.33136	ENSDARG00000042722	2.54419	1.34721	2.57289	32.2958	1.32398e-08	5.89359e-08	13	51494234	51543077	blnk	B-cell linker [Source:ZFIN;Acc:ZDB-GENE-040702-4]
comp25037_c0_seq1	0.250868	ENSDARG00000042742	1.53304	0.616391	4.72411	27.3484	1.69906e-07	6.56055e-07	22	16706118	16716538	stx6	syntaxin 6 [Source:ZFIN;Acc:ZDB-GENE-030131-858]
comp6973_c0_seq1	0.492467	ENSDARG00000042742	1.53304	0.616391	4.72411	27.3484	1.69906e-07	6.56055e-07	22	16706118	16716538	stx6	syntaxin 6 [Source:ZFIN;Acc:ZDB-GENE-030131-858]
comp30547_c0_seq1	6.34432	ENSDARG00000042816	2.33206	1.22161	6.98356	43.969	3.3361e-11	2.0269e-10	8	25134455	25148890	mmp9	matrix metalloproteinase 9 [Source:ZFIN;Acc:ZDB-GENE-040426-2132]
comp29679_c0_seq1	0.506059	ENSDARG00000042823	1.46349	0.549415	6.80031	24.07	9.28961e-07	3.22945e-06	15	4846989	4858610	spcs2	signal peptidase complex subunit 2 homolog (S. cerevisiae) [Source:ZFIN;Acc:ZDB-GENE-050320-32]
comp30312_c0_seq1	0.275672	ENSDARG00000042864	1.66501	0.735532	6.03079	24.3463	8.04804e-07	2.82331e-06	20	36699691	36703841	rpl7l1	ribosomal protein L7-like 1 [Source:ZFIN;Acc:ZDB-GENE-030131-970]
comp11430_c0_seq1	1.44252	ENSDARG00000042876	1.39332	0.47853	7.77494	10.7427	0.00104694	0.00221336	20	36831006	36842803	abracl	ABRA C-terminal like [Source:ZFIN;Acc:ZDB-GENE-030131-8594]
comp41022_c0_seq1	0.811621	ENSDARG00000042948	1.66152	0.7325	0.557288	7.13534	0.00755791	0.0136205	8	24018692	24032792	dnajc5aa	DnaJ (Hsp40) homolog, subfamily C, member 5aa [Source:ZFIN;Acc:ZDB-GENE-031113-20]
comp41022_c0_seq1	0.811621	ENSDARG00000042948	1.66152	0.7325	0.557288	7.13534	0.00755791	0.0136205	8	24018692	24032792	dnajc5aa	DnaJ (Hsp40) homolog, subfamily C, member 5aa [Source:ZFIN;Acc:ZDB-GENE-031113-20]
comp30588_c0_seq1	0.298832	ENSDARG00000042983	5.63246	2.49376	2.63676	43.933	3.3981e-11	2.0609e-10	16	27179658	27185491	has1	hyaluronan synthase 1 [Source:ZFIN;Acc:ZDB-GENE-040218-2]
comp30588_c0_seq1	0.298832	ENSDARG00000042983	5.63246	2.49376	2.63676	43.933	3.3981e-11	2.0609e-10	16	27179658	27185491	has1	hyaluronan synthase 1 [Source:ZFIN;Acc:ZDB-GENE-040218-2]
comp37931_c0_seq2	2.38166	ENSDARG00000042984	2.12551	1.08781	5.00908	38.8772	4.5133e-10	2.41264e-09	16	27210998	27213981	fpr1	formyl peptide receptor 1 [Source:ZFIN;Acc:ZDB-GENE-121227-2]
comp37931_c0_seq3	2.17903	ENSDARG00000042984	2.12551	1.08781	5.00908	38.8772	4.5133e-10	2.41264e-09	16	27210998	27213981	fpr1	formyl peptide receptor 1 [Source:ZFIN;Acc:ZDB-GENE-121227-2]
comp37931_c0_seq5	1.38876	ENSDARG00000042984	2.12551	1.08781	5.00908	38.8772	4.5133e-10	2.41264e-09	16	27210998	27213981	fpr1	formyl peptide receptor 1 [Source:ZFIN;Acc:ZDB-GENE-121227-2]
[truncated: 1,844 more rows]
